# Supplementary material for: Proteolysis-assisted cyclization facilitates site-centric target deconvolution of isothiocyanates
Source: Research Square preprint supplement (doi:10.21203/rs.3.rs-5055115/v1), 2025-10-08

## Supporting Information

### Proteolytic adduct-cyclization facilitates site-centric target deconvolution of isothiocyanates

Jing-Yang He<sup>1,2,8</sup>, Caiping Tian<sup>1,2,8</sup>, Qiang Li<sup>3,8</sup>, Jian Zhang<sup>4</sup>, Ji-Xiang He<sup>2</sup>, Lingqiang Zhang<sup>1,2</sup>, Xiaoguang Lei<sup>3,4\*</sup>, Jing Yang<sup>2,5-7\*</sup>

1. School of Basic Medical Sciences, Tsinghua University, Beijing, China
2. State Key Laboratory of Medical Proteomics, Beijing Proteome Research Center, National Center for Protein Sciences • Beijing, Beijing Institute of Lifeomics, Beijing 102206, China
3. Institute for Cancer Research, Shenzhen Bay Laboratory, Shenzhen, 518107, China
4. Beijing National Laboratory for Molecular Sciences, Key Laboratory of Bioorganic Chemistry and Molecular Engineering of Ministry of Education, College of Chemistry and Molecular Engineering, and Peking-Tsinghua Center for Life Sciences, Peking University, Beijing, 100871, China
5. Guangzhou National Laboratory, Guangzhou International Bio Island, Guangzhou 510005, Guangdong, China
6. School of Pharmaceutical Sciences, Guangzhou Medical University, Guangzhou, China
7. International Academy of Phronesis Medicine (Guangdong), Guangzhou, China
8. These authors contributed equally to this work.

\*Correspondence should be addressed to X.L. and J.Y.

([xglei@pku.edu.cn](mailto:xglei@pku.edu.cn); [yangjing@ncpsb.org.cn](mailto:yangjing@ncpsb.org.cn))

**Supplementary Table 1. Reporting summary by pChem search of the data generated from ITCyne-based chemoproteomics. PSM: peptide-spectrum match.**

| <b>Rank</b> | <b>Accurate Mass</b> | <b>Top1 Site Probability</b> | <b>Others</b> | <b>#PSM</b> | <b>#PSM L H</b> |
|-------------|----------------------|------------------------------|---------------|-------------|-----------------|
| 1           | 220.09571            | C 0.952                      | N-SIDE(0.71); | 680         | 265 415         |

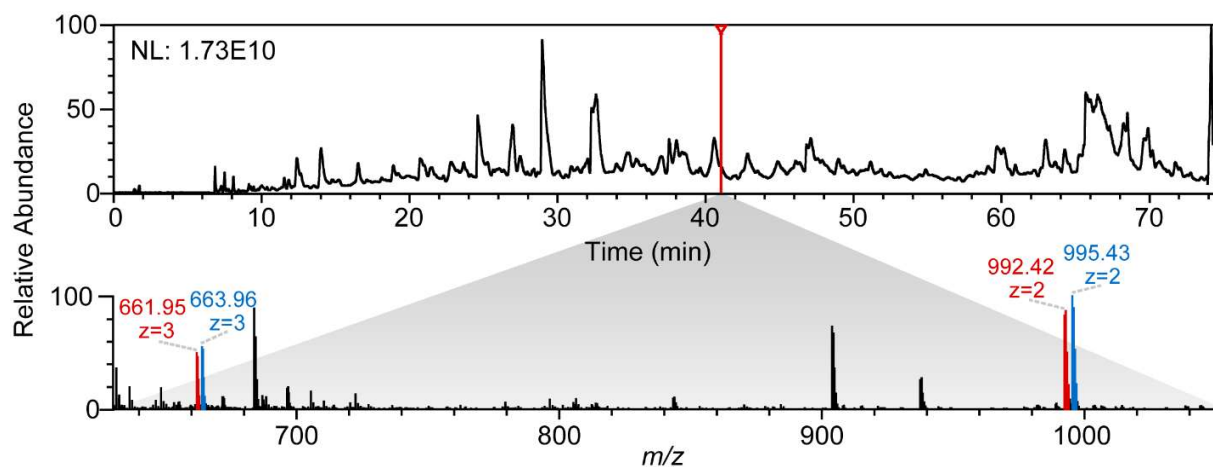

**Supplementary Figure 1. Display of LC-MS/MS data from a representative thermo. Raw file. (a)** The total ion current chromatogram showing that a large number of peaks are evenly distributed across a chromatographic time scale. NL, normalized intensity. **(b)** The full-scan MS spectrum of a randomly selected peak from (a) (denoted by the line in red color), showing a number of paired L (red) and H (blue) isotopic peaks with a  $m/z$  shift of 2 (charge 3+) or 3 (charge 2+).  $z$  = charge status.

|              |   |   |   |   |   |   |   |
|--------------|---|---|---|---|---|---|---|
| Proteinase K | - | - | - | - | - | - | + |
| ITCyne       | - | - | - | + | - | + | + |
| Lysate       | - | - | - | - | + | + | + |
| Lysis Buffer | - | - | + | + | + | + | + |
| NaHS         | + | - | - | - | - | - | - |

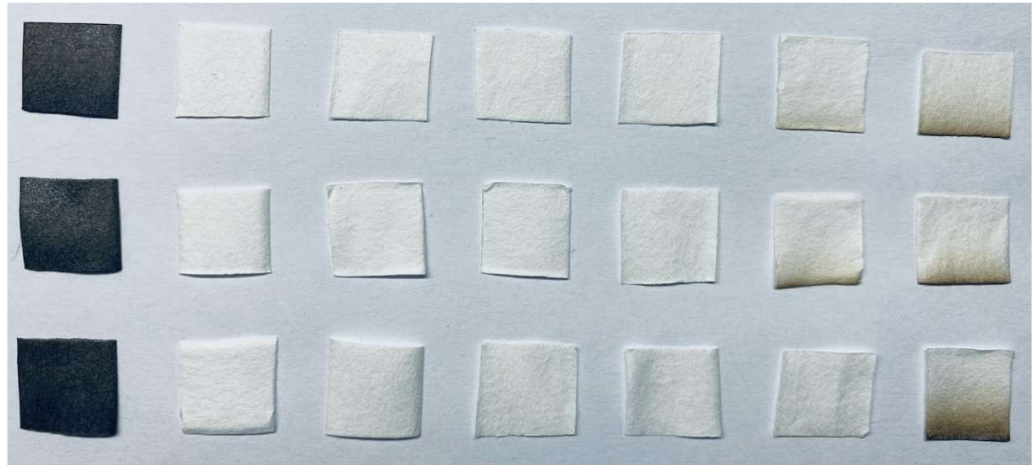

**Supplementary Figure 2. H<sub>2</sub>S production capacity of an isothiocyanate in cell lysates measured by lead acetate/lead sulfide assay.**

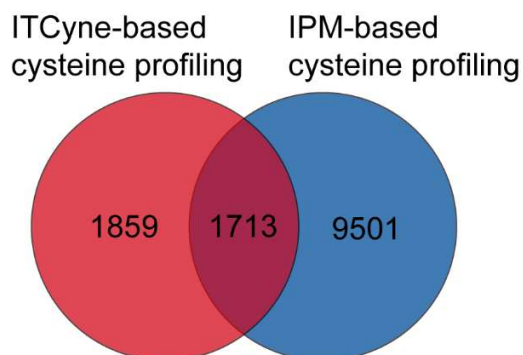

**Supplementary Figure 3. Venn diagram showing the coverage of sites mapped by using ITCyne- and IPM-based cysteine profiling.** The ITCyne-based cysteine profiling was performed as described in the main text. The IPM-based cysteine profiling was performed in parallel as previously described (Fu L, *et al.*, *Nat Protoc*, 2020, 15: 2891-2919). Specifically, the same amount of starting material was incubated with 100  $\mu$ M IPM for 1h, harvested and lysed. After proteolytic digestion with trypsin, the resulting peptides are reacted with azido biotin with a UV-cleavable linker (Az-UV-biotin). The biotinylated peptides are captured by streptavidin, and photoleased for LC-MS/MS analysis.

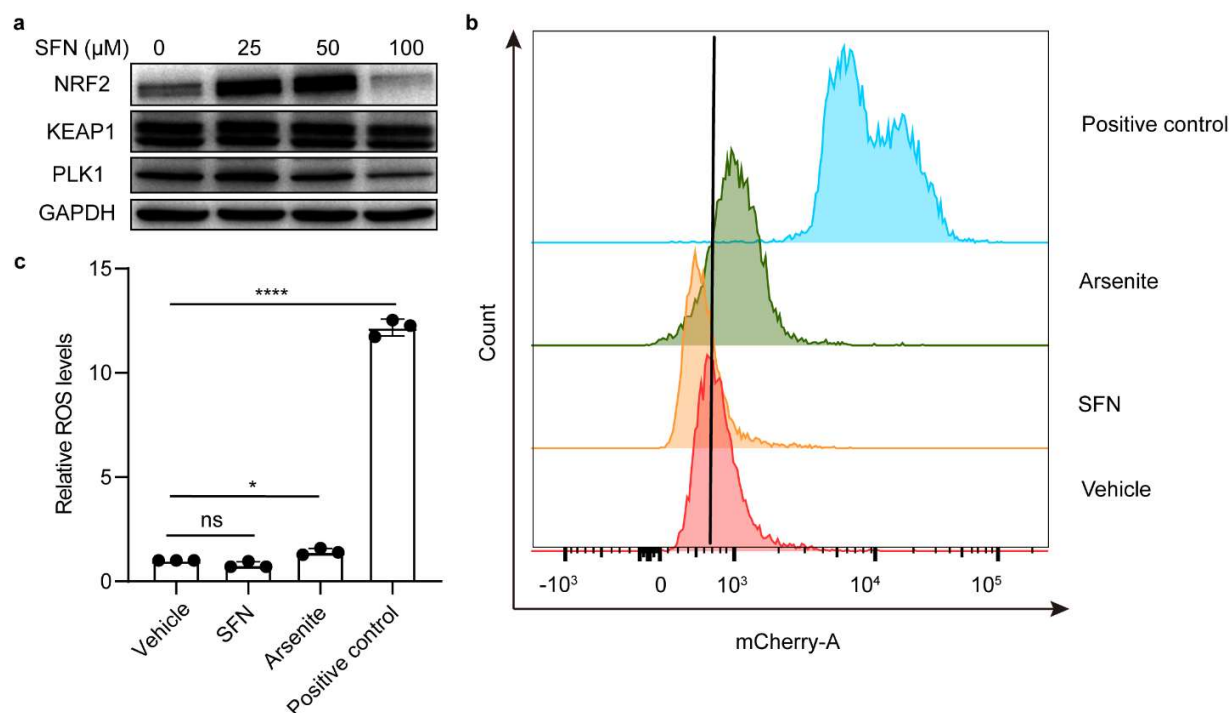

**Supplementary Figure 4.** (a) Representative immunoblots showing SFN-mediated biphasic NRF2 regulation. HEK293T cells were titrated with SFN at indicated concentration, while DMSO was used as vehicle control. The immunoblots are representative of three biological replicates. (b-c) Representative flow cytometry histogram (b) and quantification (c) of ROS levels in HEK293 cells treated with chemicals as indicated and vehicle control (See Methods for details).

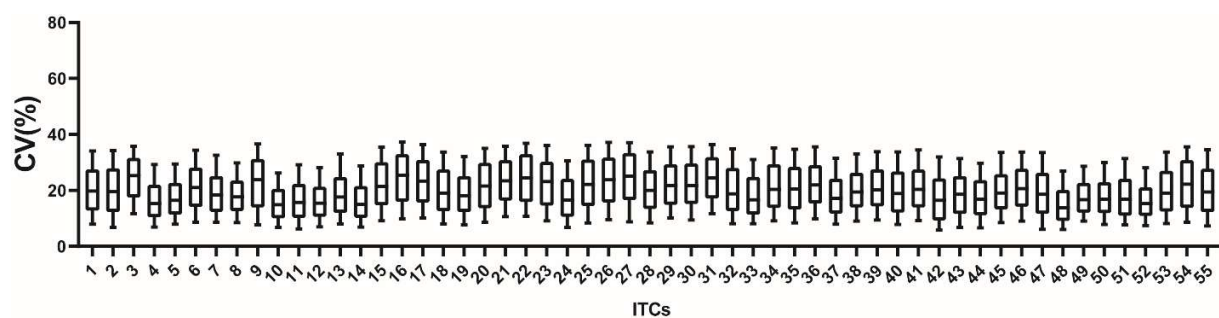

**Supplementary Figure 5. Reproducibility of ITCyne-based QTRP analysis.** Boxplots showing the distribution of CV values of the  $R_{\text{control/compound}}$  (or  $R_{\text{H/L}}$ ) values determined for each ITC compound. Data was obtained from at least three replicates. Lines in boxes denote median values and whisker lines denote the 25th and 75th percentiles.

## General synthetic methods

### Instrumentation and methods

$^1\text{H}$  NMR spectra were recorded on a Bruker 400 MHz spectrometer at ambient temperature with  $\text{CDCl}_3$  as the solvent unless otherwise stated.  $^{13}\text{C}$  NMR spectra were recorded on a Bruker 100 MHz spectrometer (with complete proton decoupling) at ambient temperature. Chemical shifts are reported in parts per million related to chloroform ( $^1\text{H}$ ,  $\delta$  7.26;  $^{13}\text{C}$ ,  $\delta$  77.00). Data for  $^1\text{H}$  NMR are reported as follows: chemical shift, multiplicity (s = singlet, d = doublet, t = triplet, q = quartet, m = multiplet), coupling constants and integration. High-resolution mass spectra were obtained at the Peking University Mass Spectrometry Laboratory using a Bruker Fourier Transform Ion Cyclotron Resonance Mass Spectrometer Solarix XR and using a TripleTOF 6600 Quadrupole Time of Flight Mass Spectrometer at the Shenzhen Bay Laboratory Mass Spectrometry Center. The samples were analyzed by HPLC/MS on a Waters Auto Purification LC/MS system (3100 Mass Detector, 2545 Binary Gradient Module, 2767 Sample Manager, and 2998 Photodiode Array (PDA) Detector). The system was equipped with a Waters C18 5m SunFire separation column (150\*4.6 mm), equilibrated with HPLC grade water (solvent A) and HPLC grade acetonitrile (solvent B) with a flow rate of 0.3 mL/min. Analytical thin layer chromatography was performed using 0.25 mm silica gel 60-F plates. Flash chromatography was performed using 200–400 mesh silica gel. Yields refer to chromatographically and spectroscopically pure materials, unless otherwise stated.

### Reagents and solvents

All chemical reagents were used as supplied by Sigma–Aldrich, J&K, Alfa Aesar Chemicals, Bidepharm, Aladdin and Energy chemicals. Anhydrous DCM with molecular sieves was purchased from Adamas. All reactions were carried out in oven-dried glassware under an argon atmosphere.

### Synthesis of SFyne.

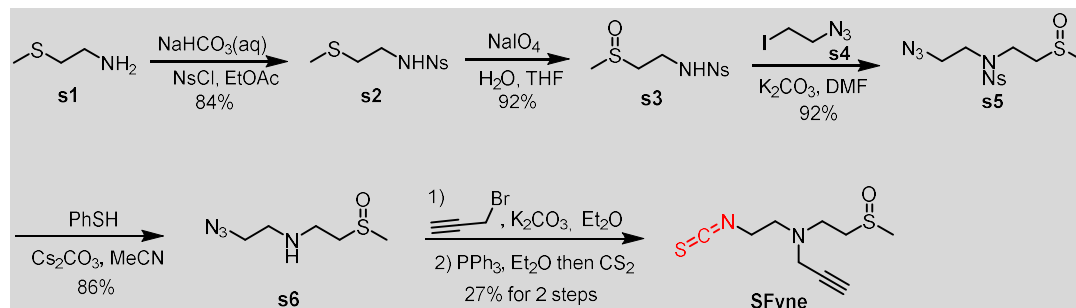

To a stirred solution of Compound **s1** (0.91 g, 10 mmol, 1 eq) in  $\text{EtOAc}$  (10 mL) and sat.  $\text{NaHCO}_3$  (10 mL) at RT was added  $\text{NsCl}$  (3.09 g, 13 mmol, 1.3 eq). After stirring for 3 h, the organic phase was washed with brine (5 mL) and dried over  $\text{Na}_2\text{SO}_4$ . The crude product was purified by column chromatography ( $\text{SiO}_2$ , eluent:  $\text{PE/EA}$ =6:1 to 2:1) to afford product **s2** (2.32 g, 8.4 mmol, 84%) as colorless oil.  $^1\text{H}$  NMR (400 MHz,  $\text{CDCl}_3$ )  $\delta$  8.20 – 8.09 (m, 1H), 7.93 – 7.85 (m, 1H), 7.83 – 7.71 (m, 2H), 6.17 (s, 1H), 3.74 – 3.57 (m, 2H), 3.11 – 3.02 (m, 1H), 2.88 (dt,  $J$  = 29.0, 11.5 Hz, 1H), 2.65 (s, 3H).  $^{13}\text{C}$  NMR (101 MHz,  $\text{DMSO}$ )  $\delta$  147.8, 134.3, 132.8, 132.3, 129.6, 124.6, 52.9, 38.1, 36.7. ESI+-MS:  $[\text{M}+\text{H}]^+$  calculated for  $\text{C}_9\text{H}_{13}\text{N}_2\text{O}_4\text{S}_2^+$ : 277.0311; found: 277.0314.



To a stirred solution of Compound **s2** (1.38 g, 5 mmol, 1 eq) in THF (10 mL) and H<sub>2</sub>O (10 mL) at RT was added NaIO<sub>4</sub> (2.14 g, 10 mmol, 2 eq). After stirring for 3 h, the solution was added EtOAc (20 mL) and sat. Na<sub>2</sub>S<sub>2</sub>O<sub>3</sub> (20 mL), the organic phase washed with brine (5 mL) and dried over Na<sub>2</sub>SO<sub>4</sub>. The crude product was purified by column chromatography (SiO<sub>2</sub>, eluent: PE/EA=5:1 to 2:1) to afford product **s3** (1.34 g, 4.6 mmol, 92%) as white solid. <sup>1</sup>H NMR (400 MHz, CDCl<sub>3</sub>) δ 8.18 – 8.09 (m, 1H), 7.93 – 7.85 (m, 1H), 7.79 – 7.70 (m, 2H), 5.79 (s, 1H), 3.32 (q, J = 6.2 Hz, 2H), 2.65 (t, J = 6.5 Hz, 2H), 2.03 (s, 3H). <sup>13</sup>C NMR (101 MHz, CDCl<sub>3</sub>) δ 148.0, 133.7, 133.6, 132.8, 130.9, 125.4, 42.1, 33.7, 14.9. ESI+-MS: [M+H]<sup>+</sup> calculated for C<sub>9</sub>H<sub>13</sub>N<sub>2</sub>O<sub>5</sub>S<sub>2</sub><sup>+</sup>: 293.0260; found: 293.0257.

To a stirred solution of Compound **s3** (584 mg, 2 mmol, 1 eq) and Compound **s4** (591 mg, 3 mmol, 1.5 eq) in DMF (6 mL) at RT was added K<sub>2</sub>CO<sub>3</sub> (552 mg, 4 mmol, 2 eq). After stirring for 3 h, the solution was added EtOAc (20 mL) and the organic phase washed with brine (10 mL x 3) and dried over Na<sub>2</sub>SO<sub>4</sub>. The crude product was purified by column chromatography (SiO<sub>2</sub>, eluent: PE/EA=6:1 to 2:1) to afford product **s5** (664 mg, 1.84 mmol, 92%) as colorless oil. <sup>1</sup>H NMR (400 MHz, CDCl<sub>3</sub>) δ 8.06 – 7.98 (m, 1H), 7.78 – 7.68 (m, 2H), 7.68 – 7.61 (m, 1H), 3.82 – 3.71 (m, 2H), 3.56 – 3.47 (m, 4H), 3.09 (dt, J = 15.2, 7.6 Hz, 1H), 2.99 – 2.87 (m, 1H), 2.60 (s, 3H). <sup>13</sup>C NMR (101 MHz, CDCl<sub>3</sub>) δ 148.0, 134.2, 132.0, 131.8, 130.8, 124.3, 53.0, 49.8, 48.0, 42.5, 38.6. ESI+-MS: [M+H]<sup>+</sup> calculated for C<sub>11</sub>H<sub>16</sub>N<sub>5</sub>O<sub>5</sub>S<sub>2</sub><sup>+</sup>: 362.0587; found: 362.0584.

To a stirred solution of Compound **s5** (361 mg, 1 mmol, 1 eq) in ACN (4 mL) at RT was added 3-Bromopropyne (330 mg, 3 mmol, 3 eq) and Cs<sub>2</sub>CO<sub>3</sub> (652 mg, 2 mmol, 2 eq). After stirring for 16 h, the solution was added EtOAc (20 mL) and the organic phase washed with brine (10 mL) and dried over Na<sub>2</sub>SO<sub>4</sub>. The crude product was purified by column chromatography (SiO<sub>2</sub>, eluent: DCM/MeOH=100:1 to 22:1) to afford product **s6** (151 mg, 0.86 mmol, 86%) as colorless oil. <sup>1</sup>H NMR (400 MHz, CDCl<sub>3</sub>) δ 3.48 – 3.33 (m, 2H), 3.21 – 3.03 (m, 2H), 2.88 – 2.72 (m, 4H), 2.59 (s, 3H), 1.69 (s, 1H). <sup>13</sup>C NMR (101 MHz, CDCl<sub>3</sub>) δ 54.7, 51.1, 48.3, 42.9, 38.9. ESI+-MS: [M+H]<sup>+</sup> calculated for C<sub>5</sub>H<sub>13</sub>N<sub>4</sub>OS<sup>+</sup>: 177.0804; found: 177.0801.

To a stirred solution of Compound **s6** (88 mg, 0.5 mmol, 1 eq) in ether (2 mL) at RT was added PhSH (119 mg, 1 mmol, 2 eq) and K<sub>2</sub>CO<sub>3</sub> (138 mg, 1 mmol, 2 eq). After stirring for 3 h, the solution was added EtOAc (20 mL) and the organic phase washed with brine (10 mL) and dried over Na<sub>2</sub>SO<sub>4</sub>. To a solution of the crude product in ether (2 mL) was added triphenylphosphine (262 mg, 1 mmol, 2 eq). After the reaction had been refluxed for 3 h, the solvent was removed under vacuum. To this residue was added carbon disulfide (1 mL); after this mixture was refluxed for 1 h, the solvent was removed under vacuum. The crude product was purified by column chromatography (SiO<sub>2</sub>, eluent: DCM/MeOH=100:1 to 22:1) to afford product **SFyne** (31 mg, 27%) as colorless oil. <sup>1</sup>H NMR (400 MHz, CDCl<sub>3</sub>) δ 3.64 – 3.57 (m, 2H), 3.51 (t, J = 2.4 Hz, 2H), 3.12 – 3.04 (m, 2H), 2.93 – 2.79 (m, 4H), 2.65 (s, 3H), 2.26 (t, J = 2.3 Hz, 1H). <sup>13</sup>C NMR (126 MHz, CDCl<sub>3</sub>) δ 77.4, 74.0, 53.4, 53.1, 46.8, 43.6, 42.3, 39.0. ESI+-MS: [M+H]<sup>+</sup> calculated for C<sub>9</sub>H<sub>15</sub>N<sub>2</sub>OS<sub>2</sub><sup>+</sup>: 231.0620; found: 231.0619.

## Synthesis of isothiocyanate compounds

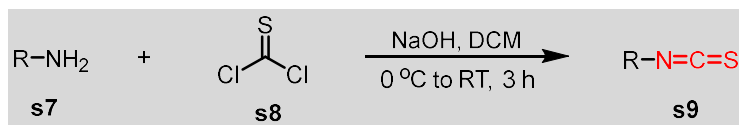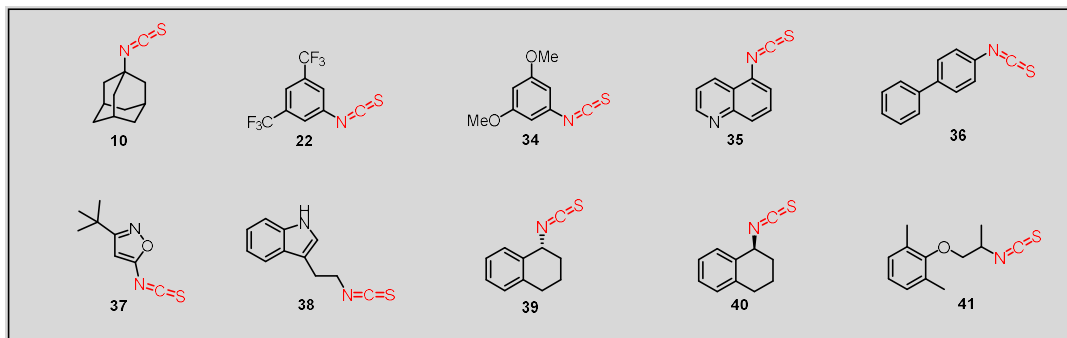

A solution of thiophosgene **s8** (3 equiv., 1.5 mmol) in anhydrous DCM (3 ml) was cooled to 0 °C under argon atmosphere. A solution of primary amine **s7** (1 equiv., 0.5 mmol) in anhydrous DCM (1 ml) was added to the above solution. Finely crushed NaOH (3 equiv., 1.5 mmol) was added, and the resulting reaction mixture was allowed to warm to room temperature over 3 h. Remove the resulting solids by filtration through kieselguhr. The solvent was removed in vacuo and the residue was purified by flash chromatography to afford the desired compounds **s9**.

### (3s,5s,7s)-1-isothiocyanatoadamantane (**10**)

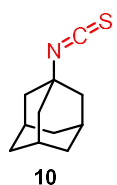

The residue was purified by flash chromatography (silica gel, 10% EtOAc in petrol ether) to afford the desired compounds **10** as white solid (81 mg, 84%). <sup>1</sup>H NMR (400 MHz CDCl<sub>3</sub>): δ 2.11 (s, 3H), 1.98 (d, J = 4 Hz, 6H), 1.66 (d, J = 4 Hz, 6H); <sup>13</sup>C NMR (100 MHz CDCl<sub>3</sub>): δ 58.4, 43.7, 35.5, 29.2; HRMS (ESI): [M-NCS]<sup>+</sup> calculated for C<sub>10</sub>H<sub>15</sub>: 135.1174, found: 135.1167.

### 1-isothiocyanato-3,5-bis(trifluoromethyl)benzene (**22**)

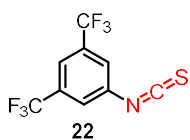

The residue was purified by flash chromatography (silica gel, 10% DCM in petrol ether) to afford the desired compounds **22** as colorless liquid (120 mg, 89%). <sup>1</sup>H NMR (400 MHz CDCl<sub>3</sub>): δ 7.76 (s, 1H), 7.64 (s, 2H); <sup>13</sup>C NMR (100 MHz CDCl<sub>3</sub>): δ 140.9, 134.0, 133.4 (q, J = 30 Hz), 125.8 (m), 122.5 (q, J = 270 Hz), 120.5 (m); HRMS (ESI): [M+H]<sup>+</sup> calculated for C<sub>9</sub>H<sub>4</sub>F<sub>6</sub>NS<sup>+</sup>: 271.9963, found: 271.9971.

### 1-isothiocyanato-3,5-dimethoxybenzene (**34**)

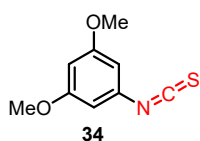

The residue was purified by flash chromatography (silica gel, 10% EtOAc in petrol ether) to afford the desired compounds **34** as brown solid (79 mg, 81%). <sup>1</sup>H NMR (400 MHz CDCl<sub>3</sub>): δ 6.37 (s, 3H), 3.77 (s, 6H); <sup>13</sup>C NMR (100 MHz CDCl<sub>3</sub>): δ 161.1, 135.3, 132.5, 104.0, 100.3, 55.5; HRMS (ESI): [M+H]<sup>+</sup> calculated for C<sub>9</sub>H<sub>10</sub>NO<sub>2</sub>S<sup>+</sup>: 196.0427, found: 196.0434.

### 5-isothiocyanatoquinoline (35)

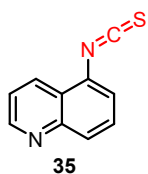

The residue was purified by flash chromatography (silica gel, 10% EtOAc in petrol ether) to afford the desired compounds **35** as yellow solid (71 mg, 76%). **<sup>1</sup>H NMR** (400 MHz CDCl<sub>3</sub>): δ 8.99 (d, J = 8 Hz, 1H), 8.46 (d, J = 8 Hz, 1H), 8.06 (d, J = 8 Hz, 1H), 7.67 (t, J = 8 Hz, 1H), 7.53 (q, J = 4 Hz, 1H), 7.50 (d, J = 8 Hz, 1H); **<sup>13</sup>C NMR** (100 MHz CDCl<sub>3</sub>): δ 151.4, 148.4, 137.5, 131.2, 129.2, 129.0, 127.6, 124.7, 123.9, 122.1; **HRMS (ESI)**: [M+H]<sup>+</sup> calculated for C<sub>10</sub>H<sub>7</sub>N<sub>2</sub>S<sup>+</sup>: 187.0324, found: 187.0330.

### 4-isothiocyanato-1,1'-biphenyl (36)

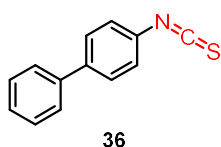

The residue was purified by flash chromatography (silica gel, 10% EtOAc in petrol ether) to afford the desired compounds **36** as white solid (68 mg, 65%). **<sup>1</sup>H NMR** (400 MHz CDCl<sub>3</sub>): δ 7.56 (m, 4H), 7.45 (t, J = 8 Hz, 2H), 7.37 (t, J = 8 Hz, 1H), 7.30 (d, J = 8 Hz, 2H); **<sup>13</sup>C NMR** (100 MHz CDCl<sub>3</sub>): δ 140.3, 139.7, 135.5, 130.2, 128.9, 128.1, 127.8, 127.0, 126.1; **HRMS (ESI)**: [M+H]<sup>+</sup> calculated for C<sub>13</sub>H<sub>10</sub>NS<sup>+</sup>: 212.0528, found: 212.0532.

### 3-(tert-butyl)-5-isothiocyanatoisoxazole (37)

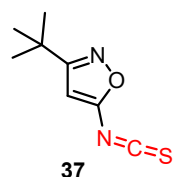

The residue was purified by flash chromatography (silica gel, 10% DCM in petrol ether) to afford the desired compounds **37** as brown liquid (70 mg, 77%). **<sup>1</sup>H NMR** (400 MHz CDCl<sub>3</sub>): δ 5.87 (s, 1H), 1.31 (s, 9H); **<sup>13</sup>C NMR** (100 MHz CDCl<sub>3</sub>): δ 173.8, 152.6, 148.2, 93.9, 32.6, 29.1; **HRMS (ESI)**: [M+H]<sup>+</sup> calculated for C<sub>8</sub>H<sub>11</sub>N<sub>2</sub>OS<sup>+</sup>: 183.0587, found: 183.0588.

### 3-(2-isothiocyanatoethyl)-1H-indole (38)

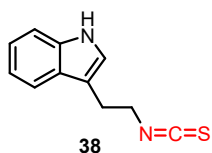

The residue was purified by flash chromatography (silica gel, 20% EtOAc in petrol ether) to afford the desired compounds **38** as yellow liquid (30 mg, 30%). **<sup>1</sup>H NMR** (400 MHz CDCl<sub>3</sub>): δ 8.09 (s, 1H), 7.56 (d, J = 8 Hz, 1H), 7.40 (d, J = 8 Hz, 1H), 7.23 (t, J = 8 Hz, 1H), 7.15 (t, J = 8 Hz, 1H), 7.13 (s, 1H), 3.78 (t, J = 8 Hz, 2H), 3.18 (t, J = 8 Hz, 2H); **<sup>13</sup>C NMR** (100 MHz CDCl<sub>3</sub>): δ 136.2, 126.8, 122.9, 122.3, 119.7, 118.2, 111.4, 111.2, 45.6, 26.5; **HRMS (ESI)**: [M+H]<sup>+</sup> calculated for C<sub>11</sub>H<sub>11</sub>N<sub>2</sub>S<sup>+</sup>: 203.0637, found: 203.0641.

**(R)-1-isothiocyanato-1,2,3,4-tetrahydronaphthalene (39)**

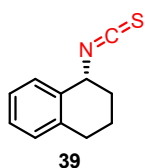

The residue was purified by flash chromatography (silica gel, 10% EtOAc in petrol ether) to afford the desired compounds **39** as brown solid (95 mg, Quant.). **<sup>1</sup>H NMR** (400 MHz CDCl<sub>3</sub>): δ 7.35 (m, 1H), 7.23 (t, J = 4 Hz, 2H), 7.13 (m, 1H), 4.94 (t, J = 8 Hz, 2H), 2.86 (m, 1H), 2.75 (m, 1H), 2.12 (m, 2H), 2.00 (m, 1H), 1.86 (m, 1H); **<sup>13</sup>C NMR** (100 MHz CDCl<sub>3</sub>): δ 136.4, 133.2, 131.8, 129.4, 128.6, 128.3, 126.5, 55.7, 30.8, 28.5, 19.3; **HRMS (ESI)**: [M-NCS]<sup>+</sup> calculated for C<sub>10</sub>H<sub>11</sub>: 131.0861, found: 131.0853.

**(S)-1-isothiocyanato-1,2,3,4-tetrahydronaphthalene (40)**

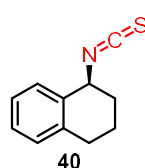

The residue was purified by flash chromatography (silica gel, 10% EtOAc in petrol ether) to afford the desired compounds **40** as brown solid (86 mg, 91%). **<sup>1</sup>H NMR** (400 MHz CDCl<sub>3</sub>): δ 7.35 (m, 1H), 7.23 (t, J = 4 Hz, 2H), 7.13 (m, 1H), 4.94 (t, J = 8 Hz, 2H), 2.86 (m, 1H), 2.75 (m, 1H), 2.12 (m, 2H), 2.00 (m, 1H), 1.86 (m, 1H); **<sup>13</sup>C NMR** (100 MHz CDCl<sub>3</sub>): δ 136.4, 133.2, 131.7, 129.4, 128.6, 128.3, 126.5, 55.7, 30.8, 28.5, 19.3; **HRMS (ESI)**: [M-NCS]<sup>+</sup> calculated for C<sub>10</sub>H<sub>11</sub>: 131.0861, found: 131.0852.

**2-(2-isothiocyanatopropoxy)-1,3-dimethylbenzene (41)**

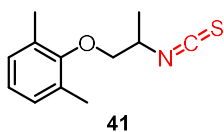

The residue was purified by flash chromatography (silica gel, 10% EtOAc in petrol ether) to afford the desired compounds **41** as brown liquid (97 mg, 88%). **<sup>1</sup>H NMR** (400 MHz CDCl<sub>3</sub>): δ 6.95 (d, J = 8 Hz, 2H), 6.87 (d, J = 8 Hz, 1H), 4.08 (m, 1H), δ 6.95 (d, J = 4 Hz, 2H), 2.23 (s, 6H), 1.43 (d, J = 4 Hz, 3H); **<sup>13</sup>C NMR** (100 MHz CDCl<sub>3</sub>): δ 154.7, 132.8, 130.7, 129.0, 124.3, 74.1, 53.6, 18.3, 16.2; **HRMS (ESI)**: [M+H]<sup>+</sup> calculated for C<sub>12</sub>H<sub>16</sub>NOS<sup>+</sup>: 222.0947, found: 222.0947.

# <sup>1</sup>H NMR and <sup>13</sup>C NMR Spectra

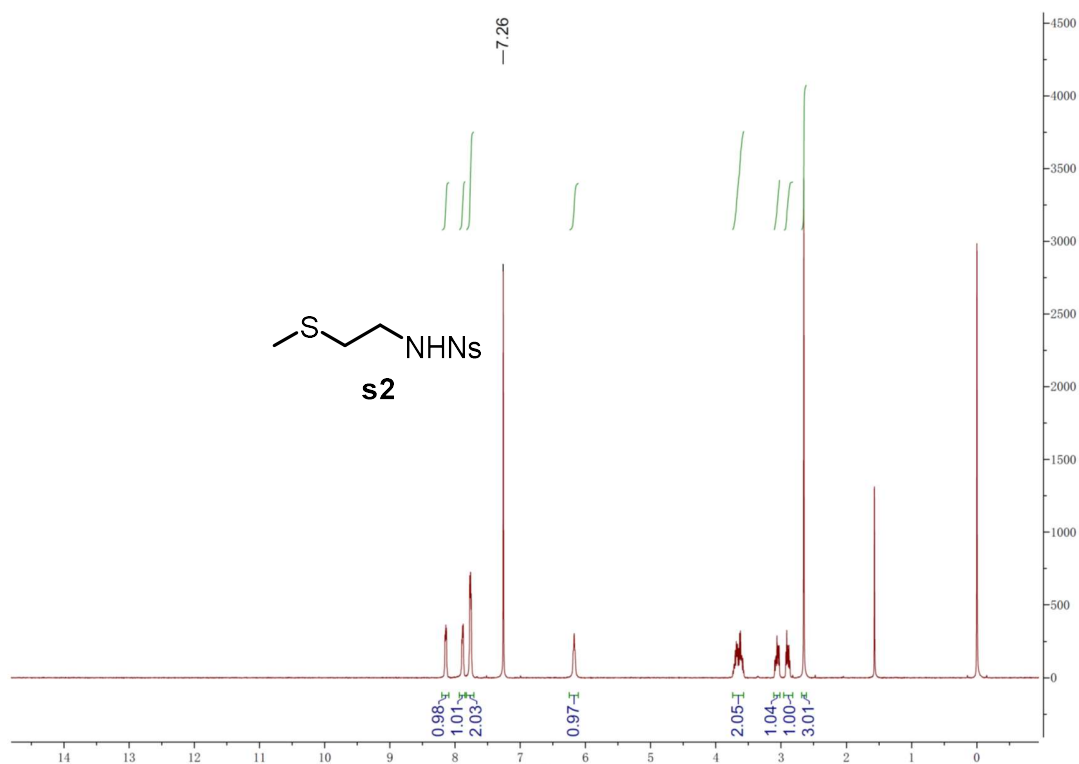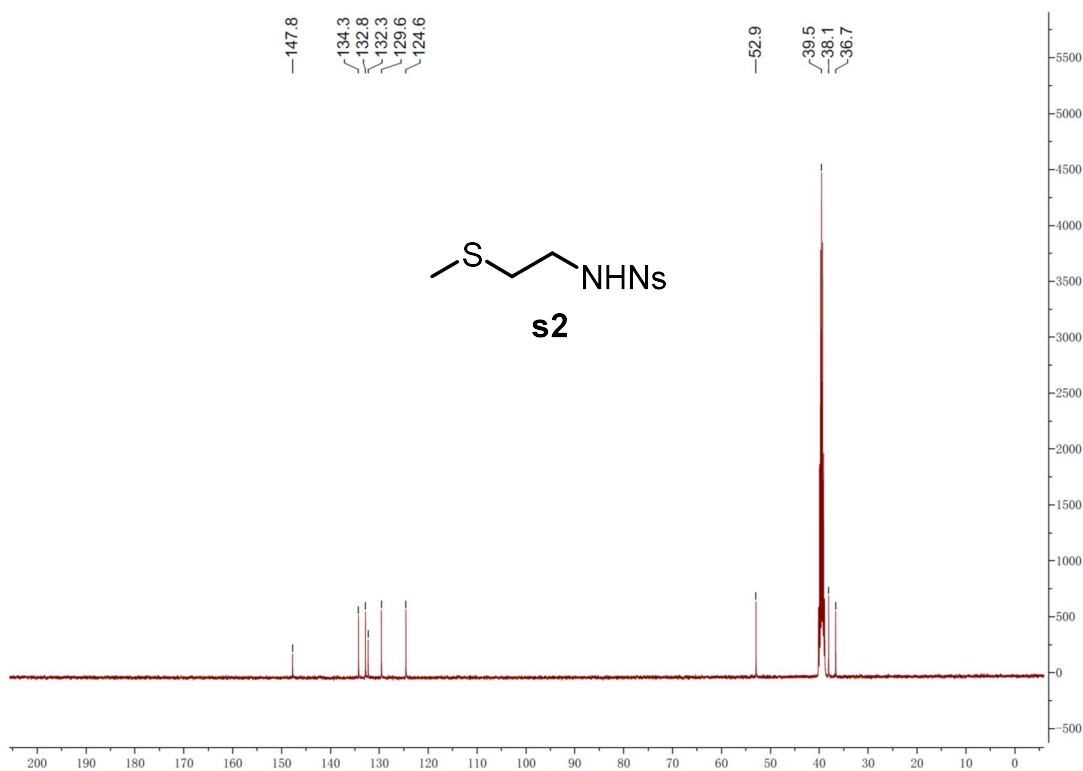

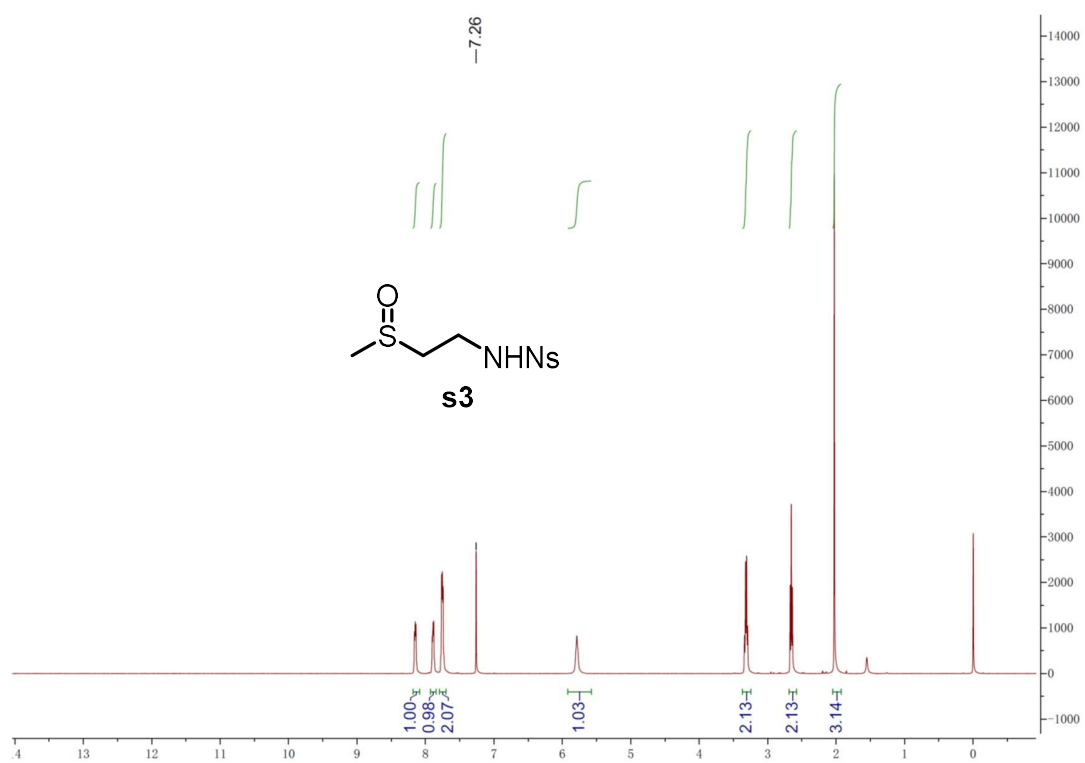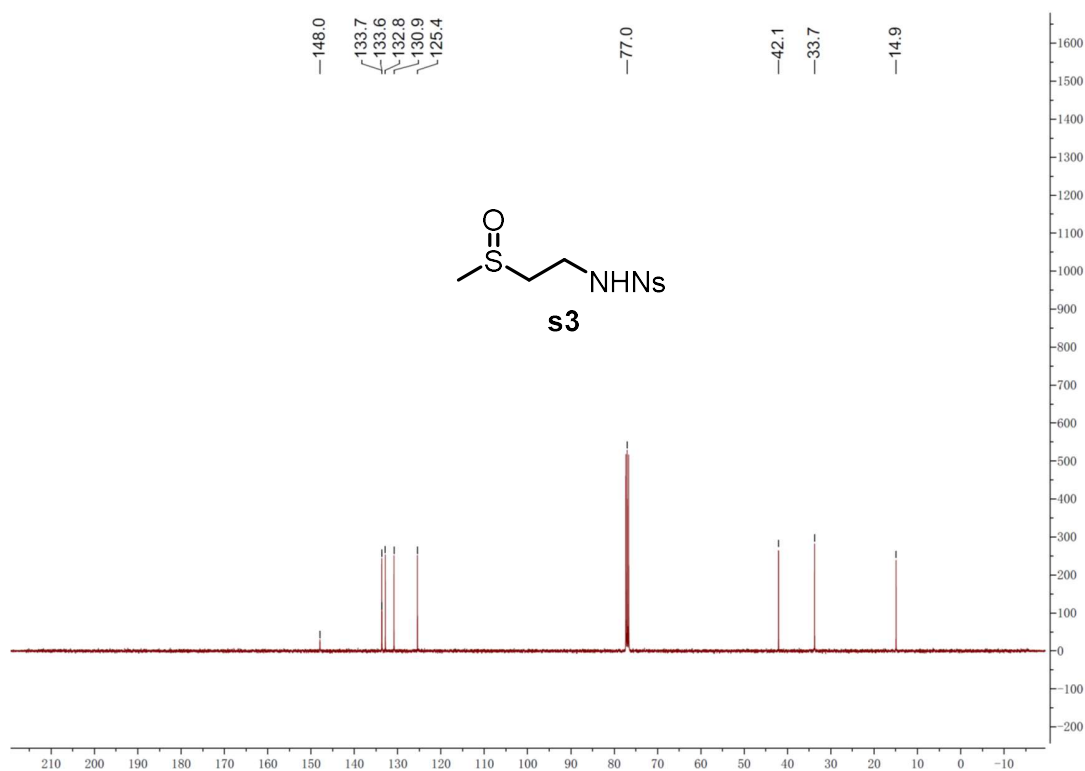

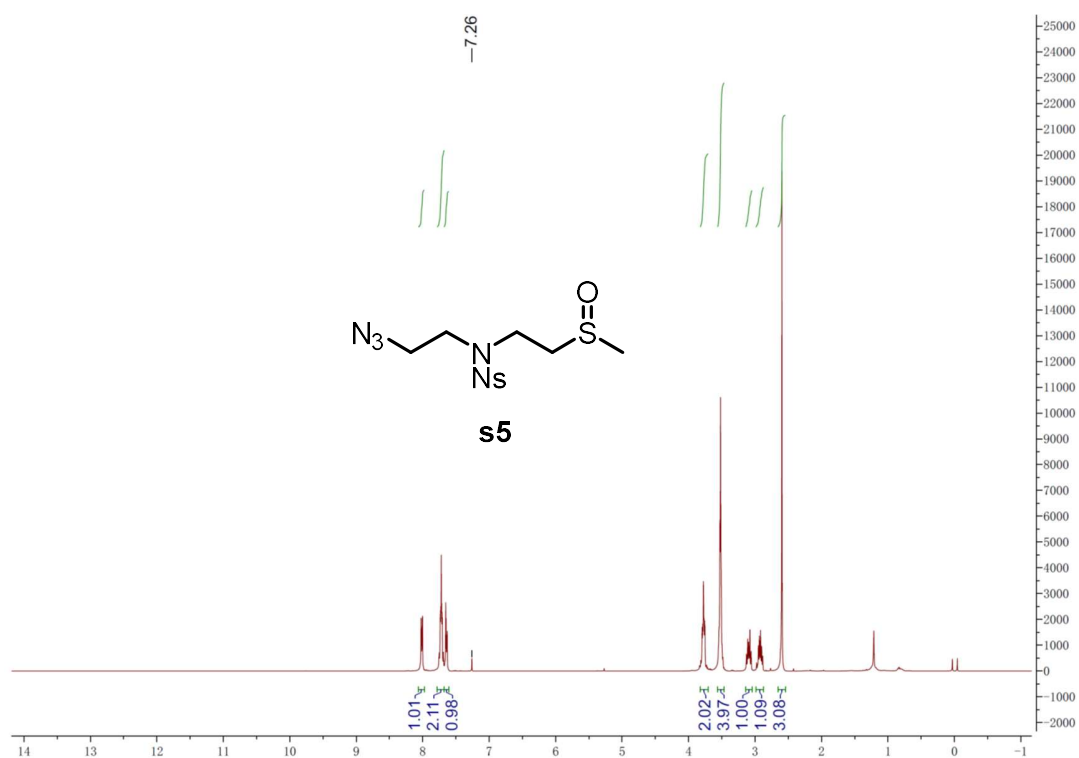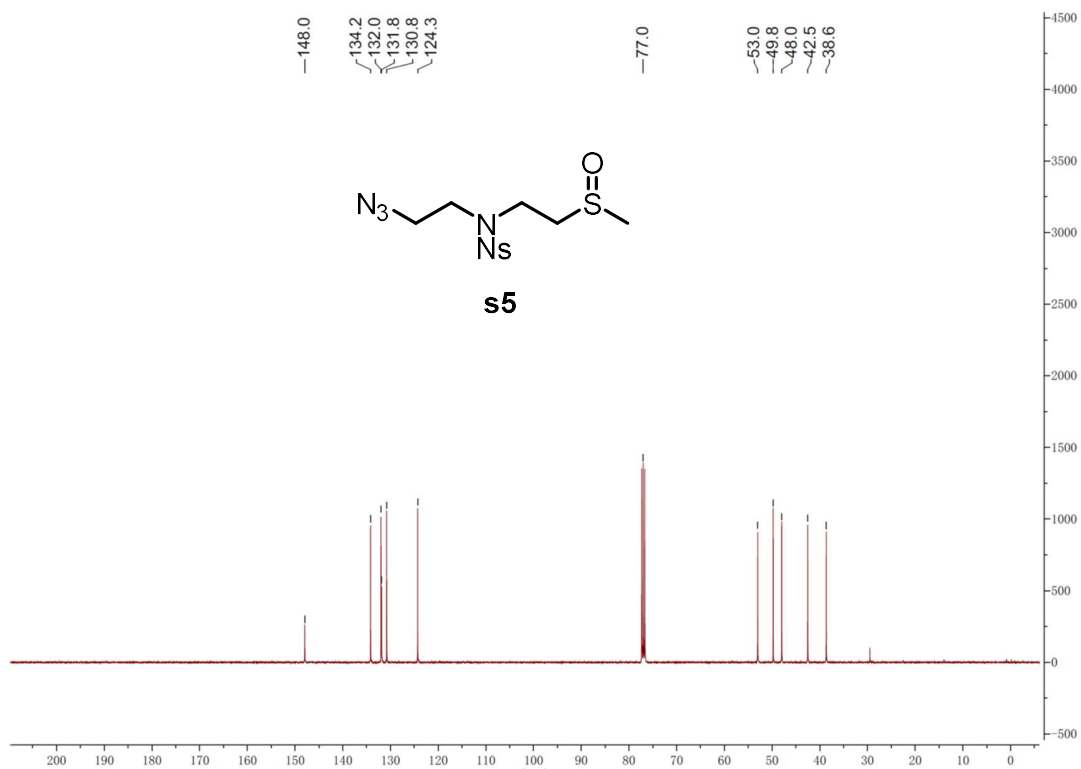

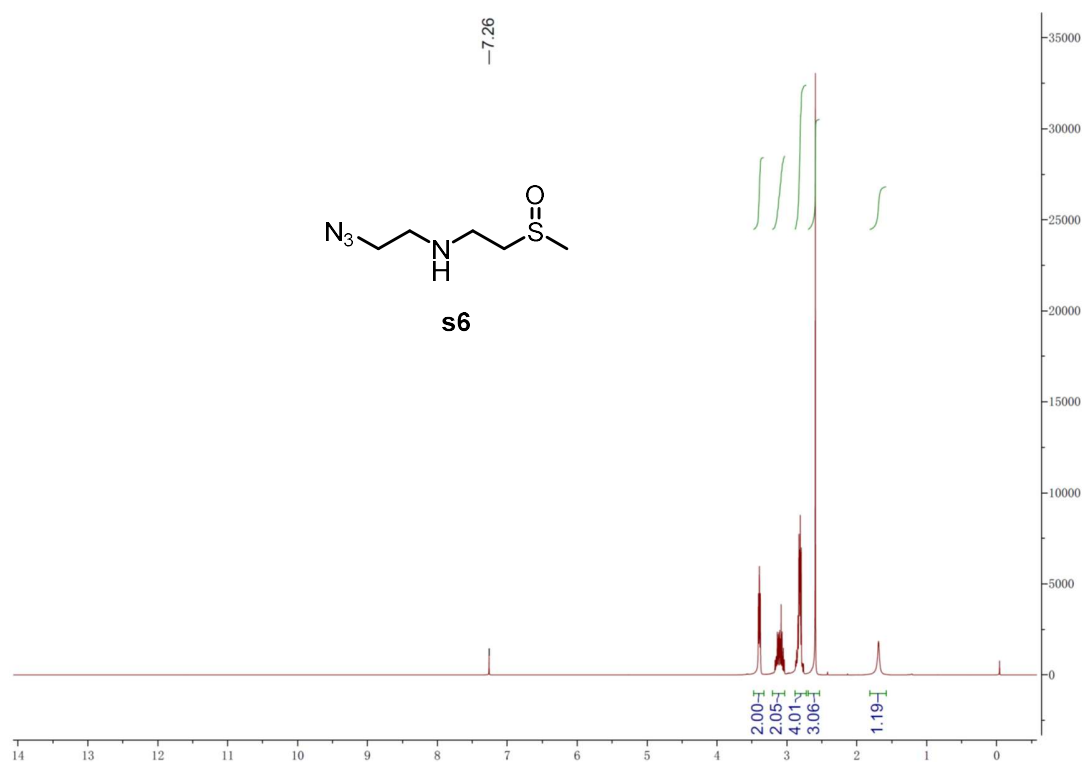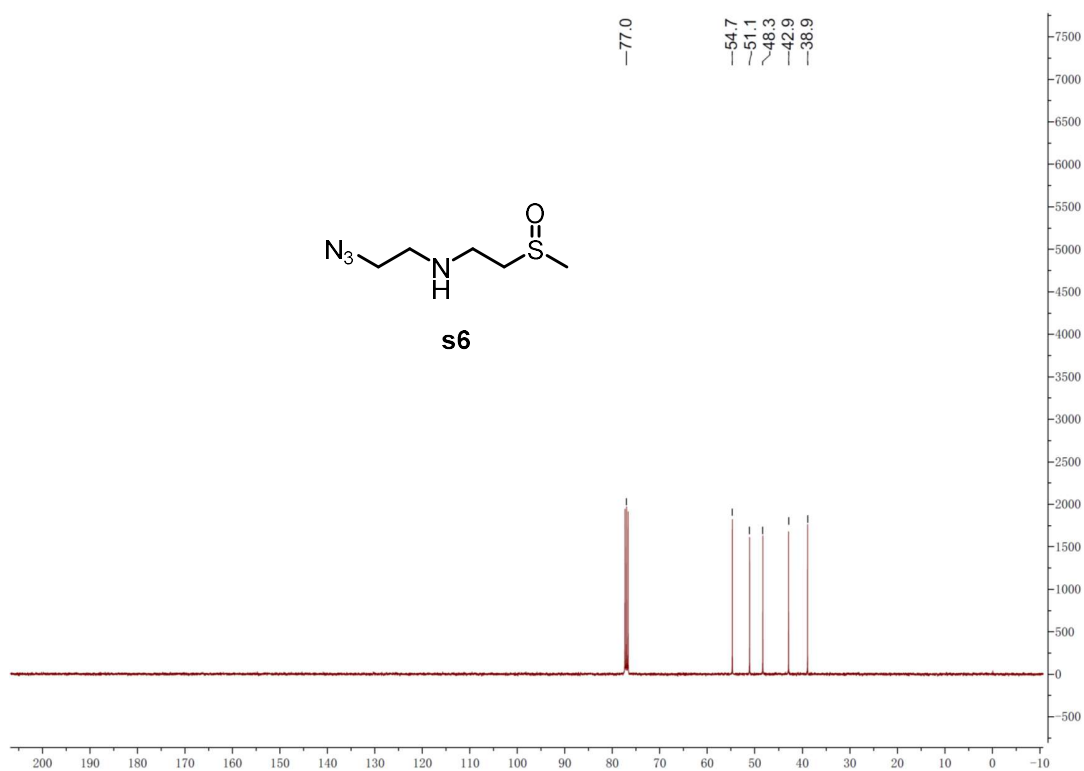



-7.26

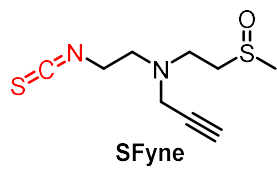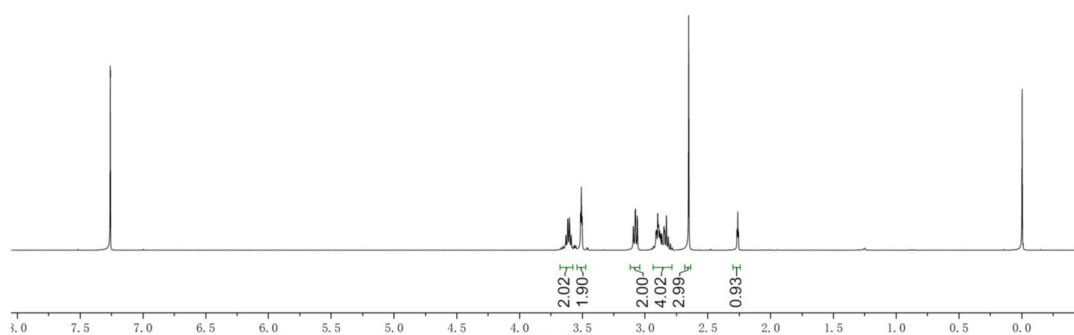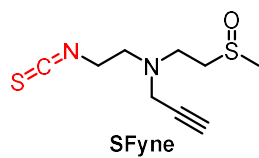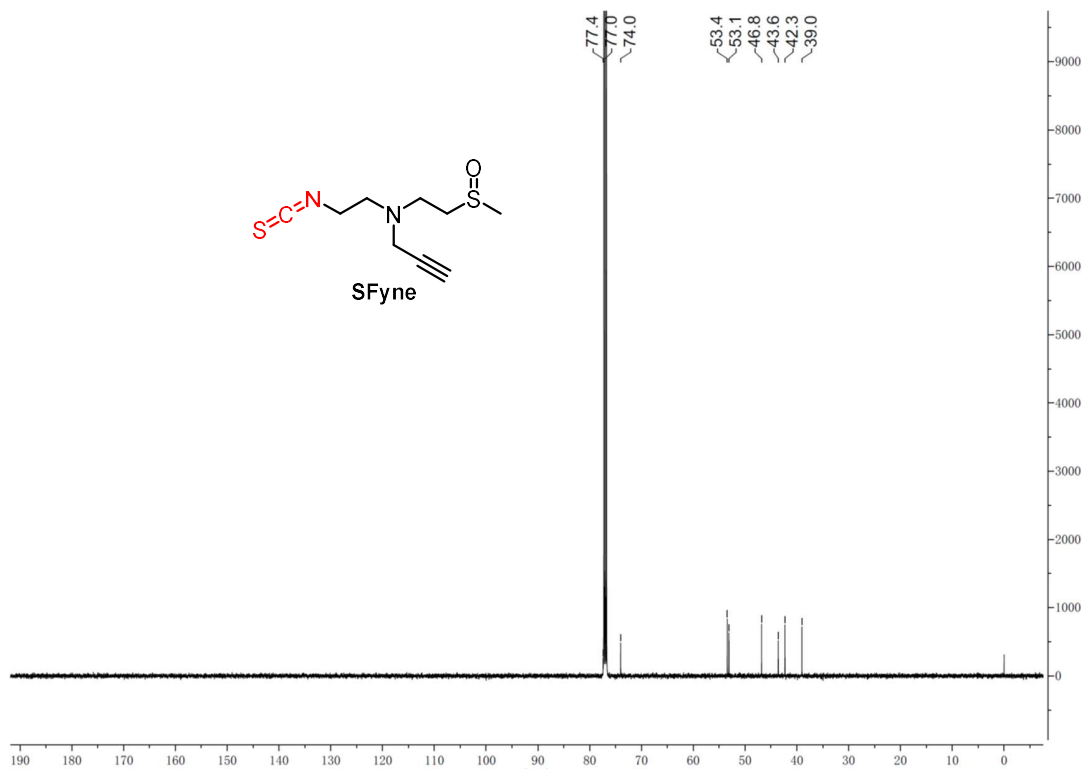

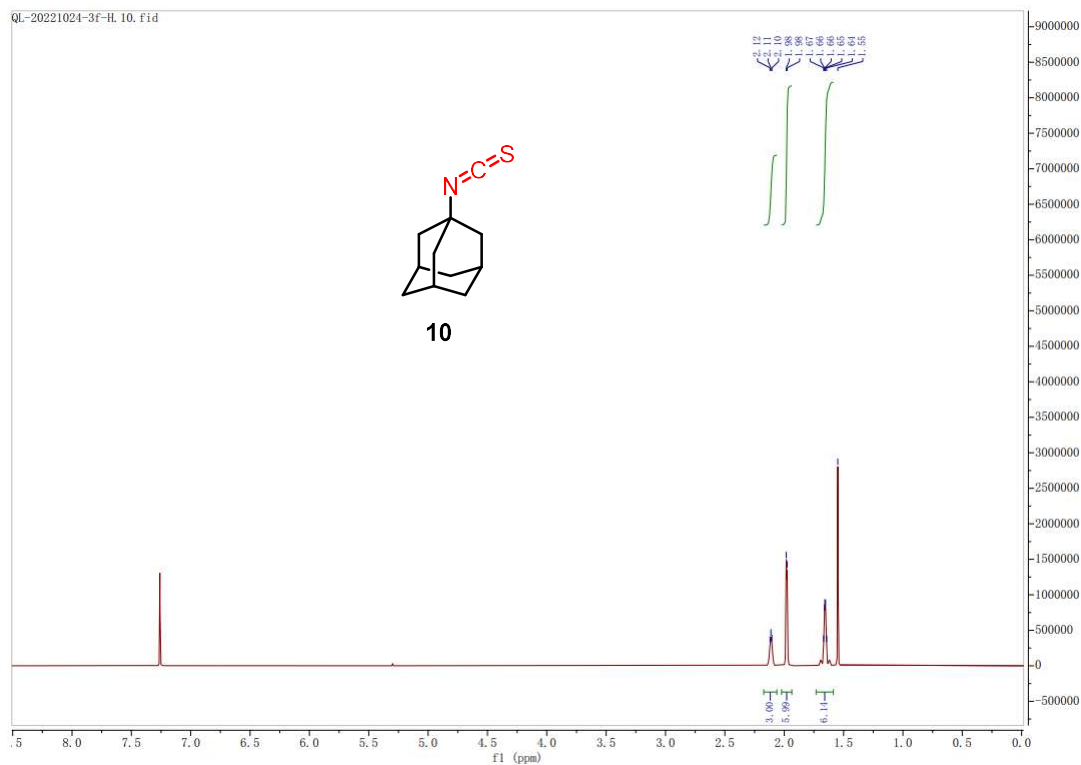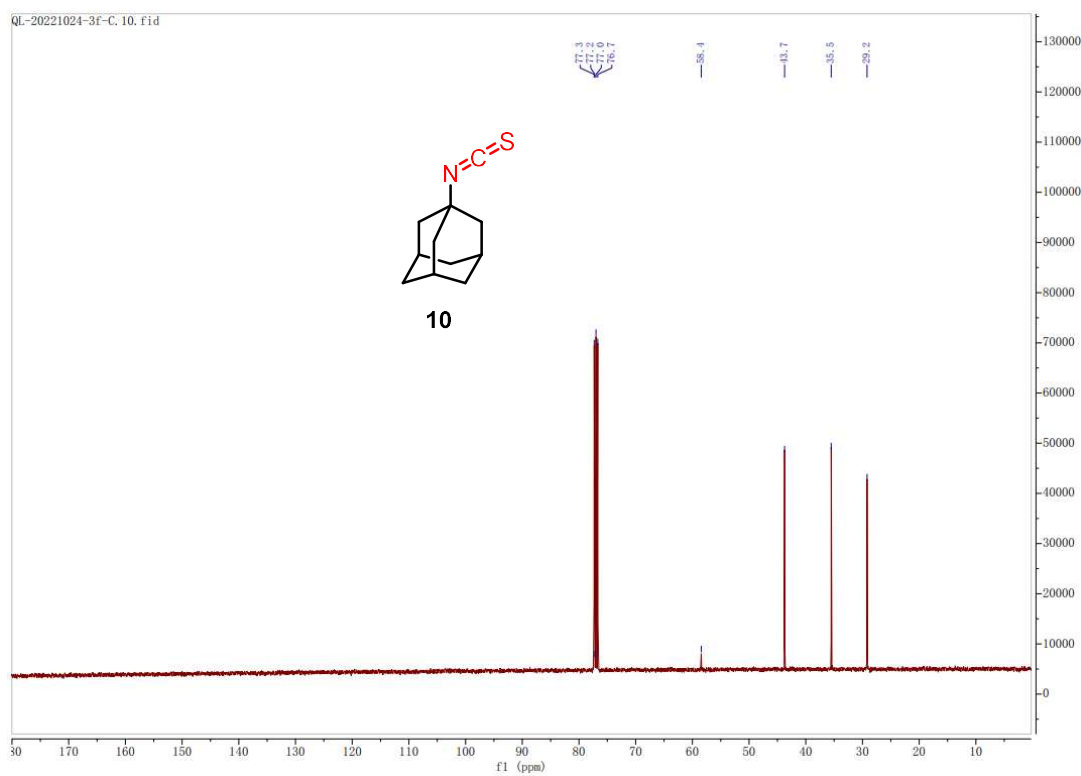

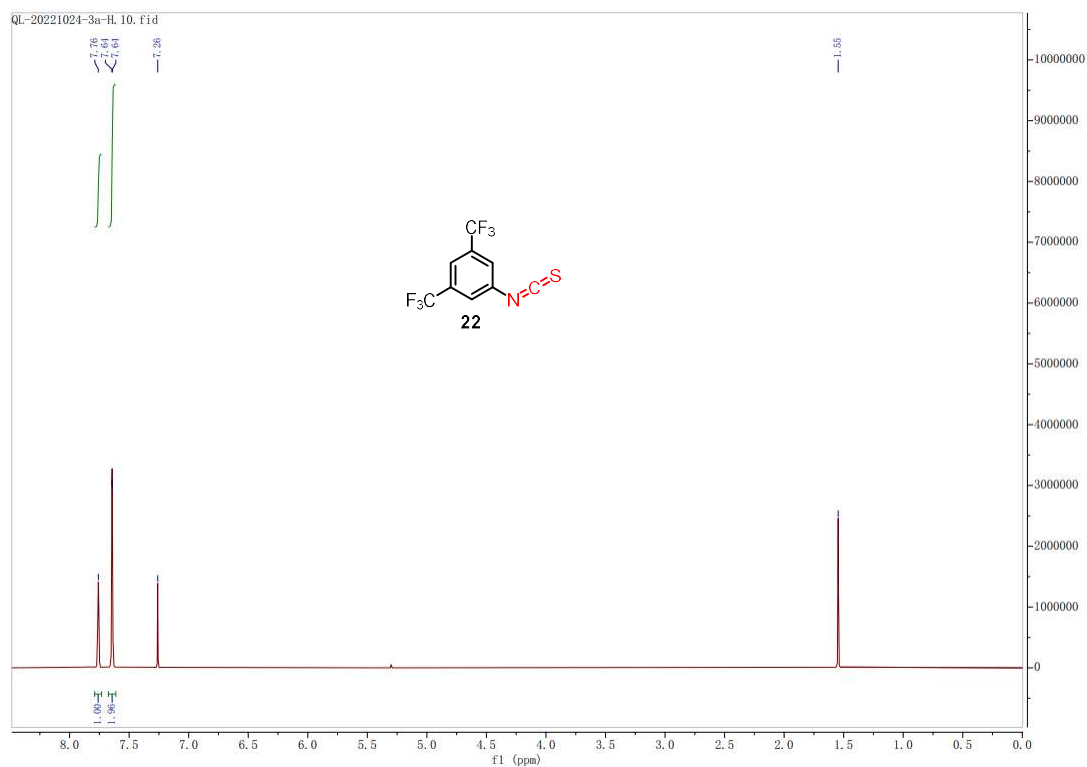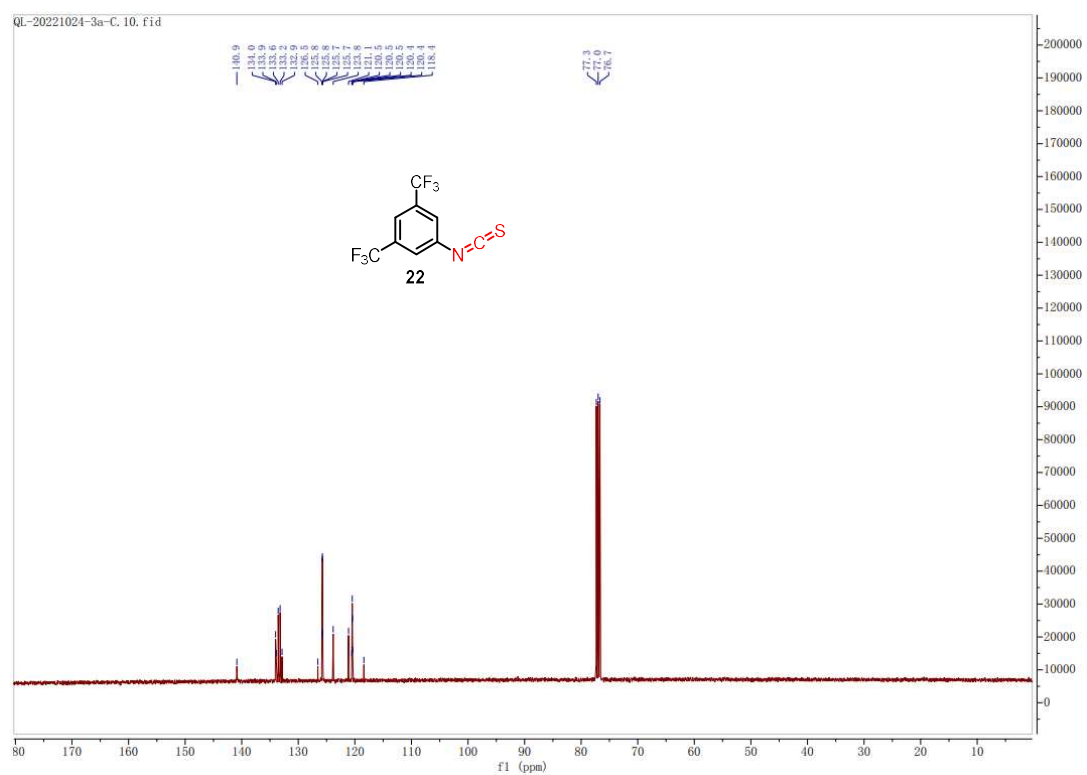

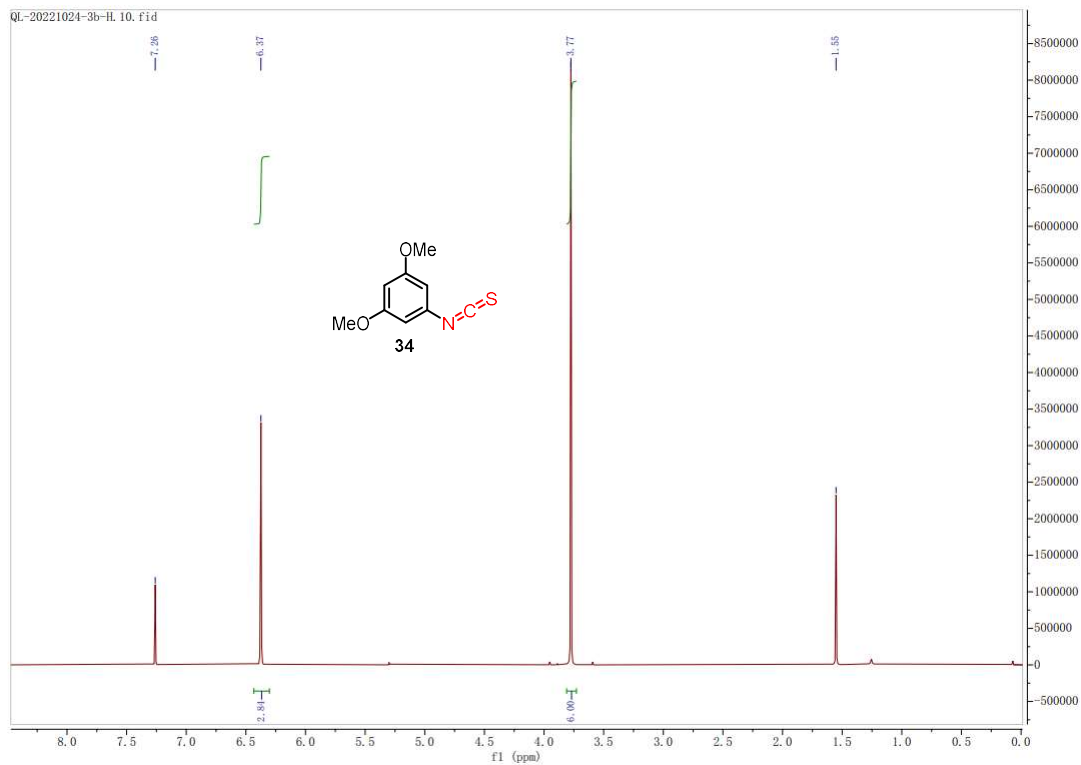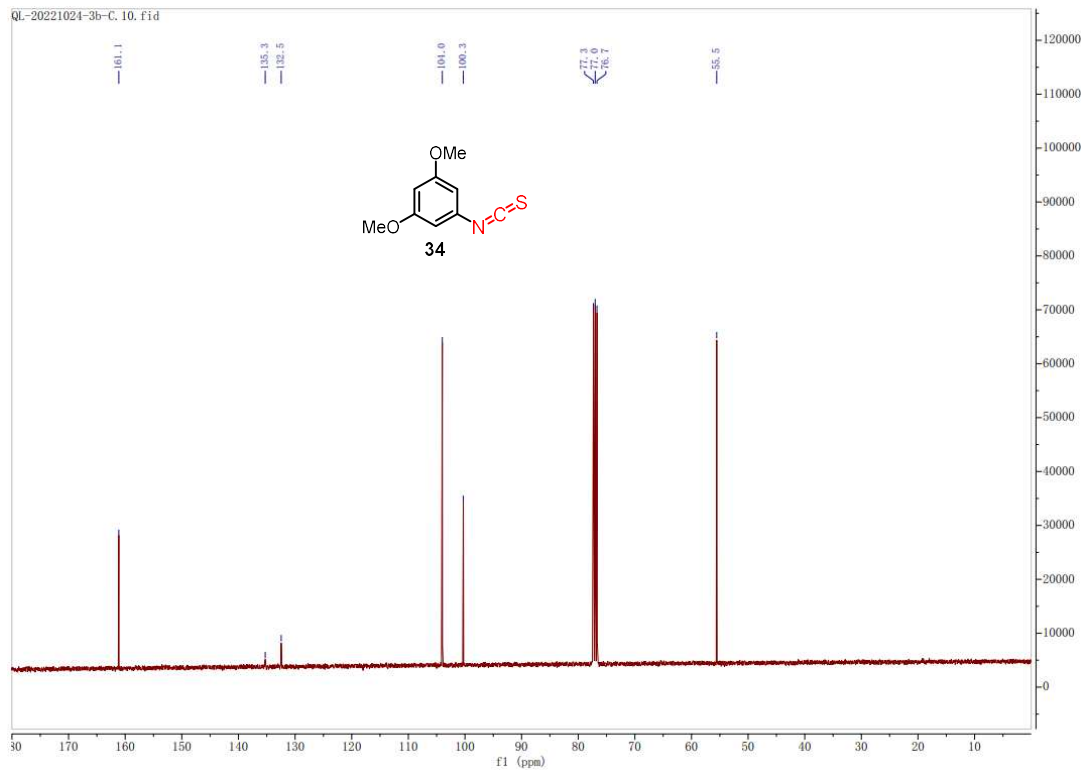

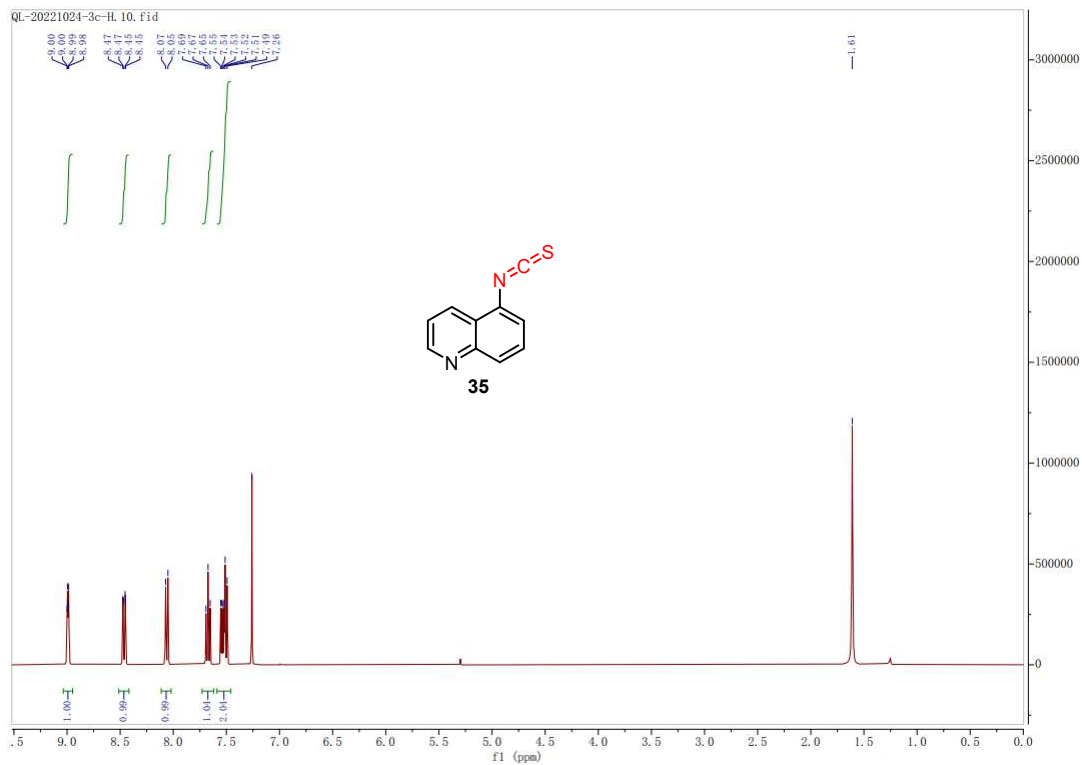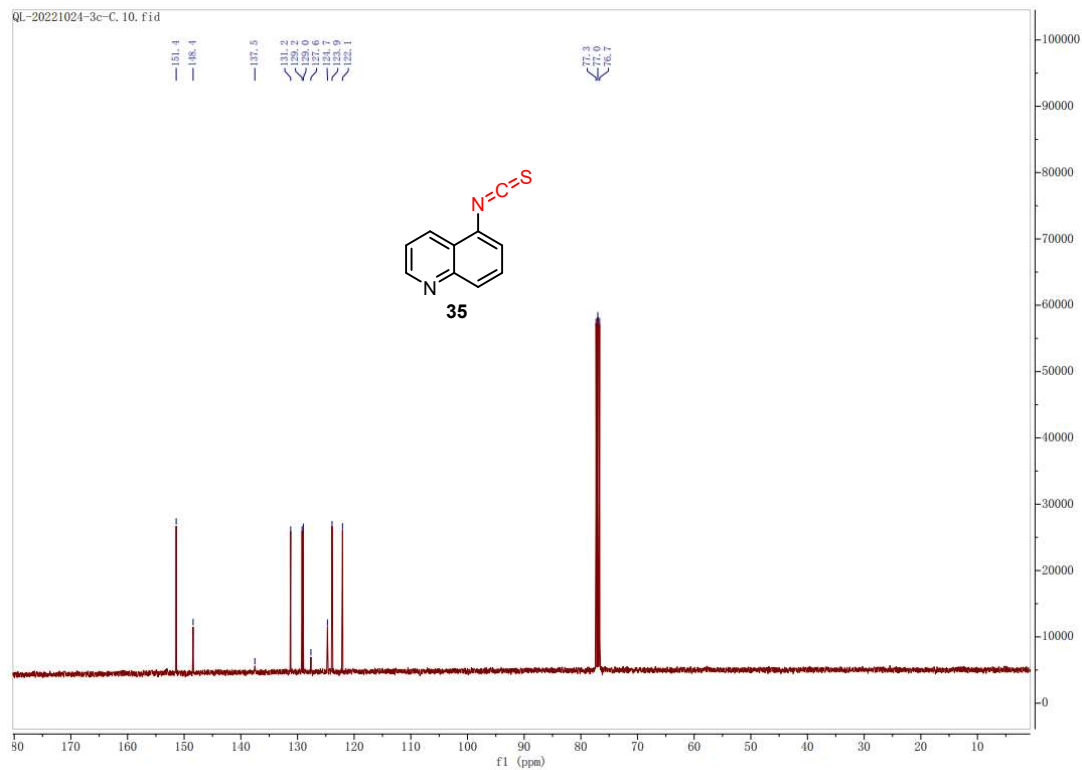

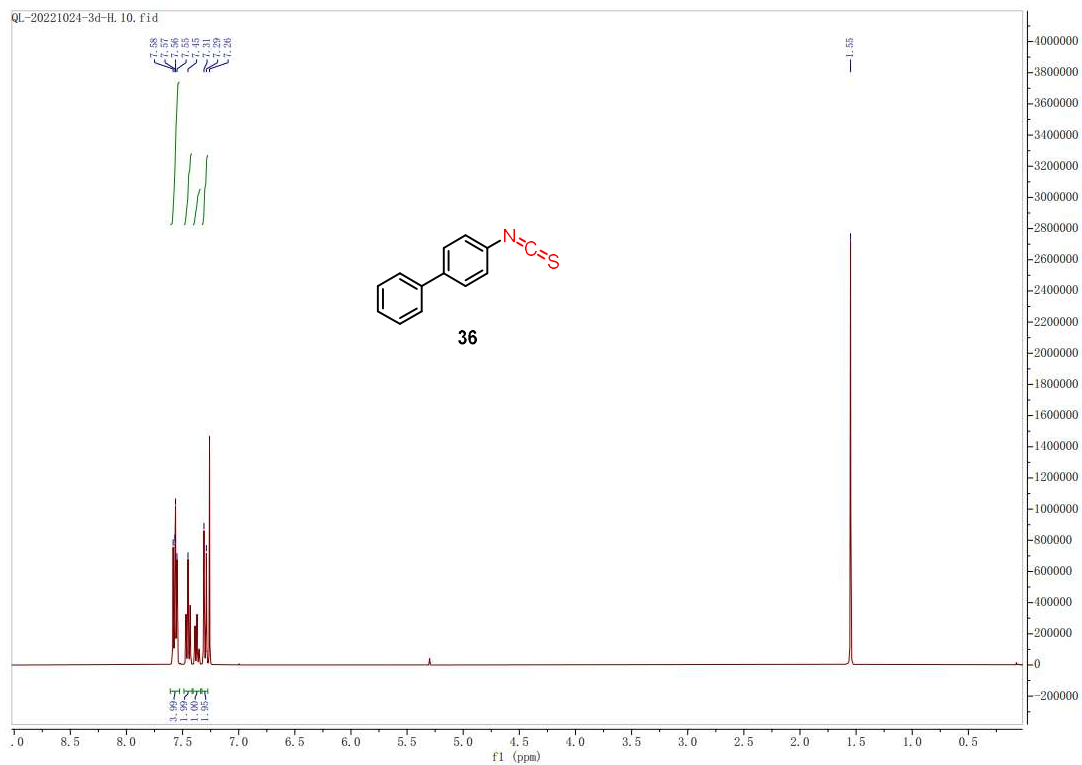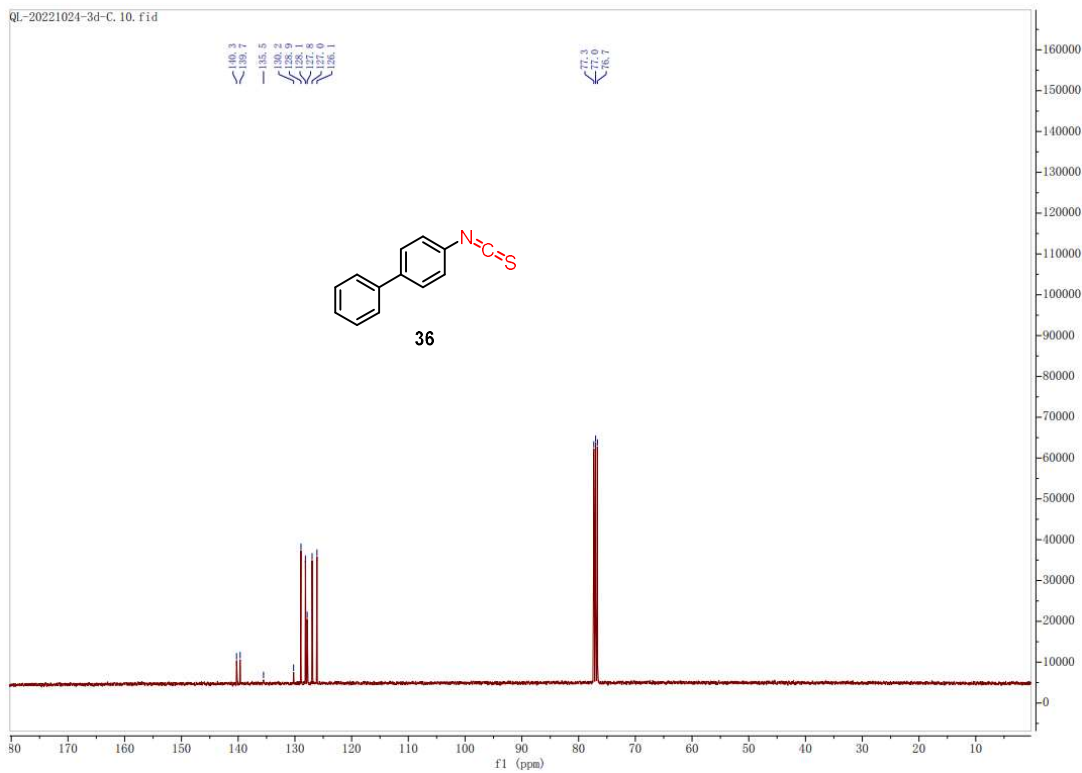

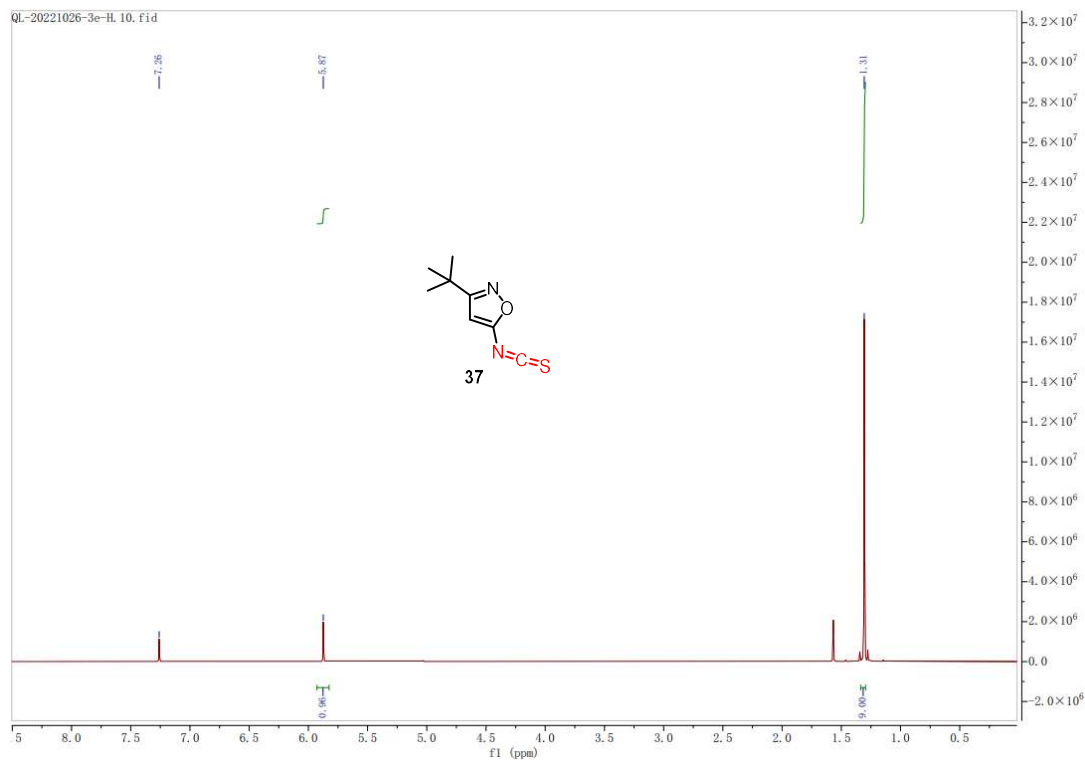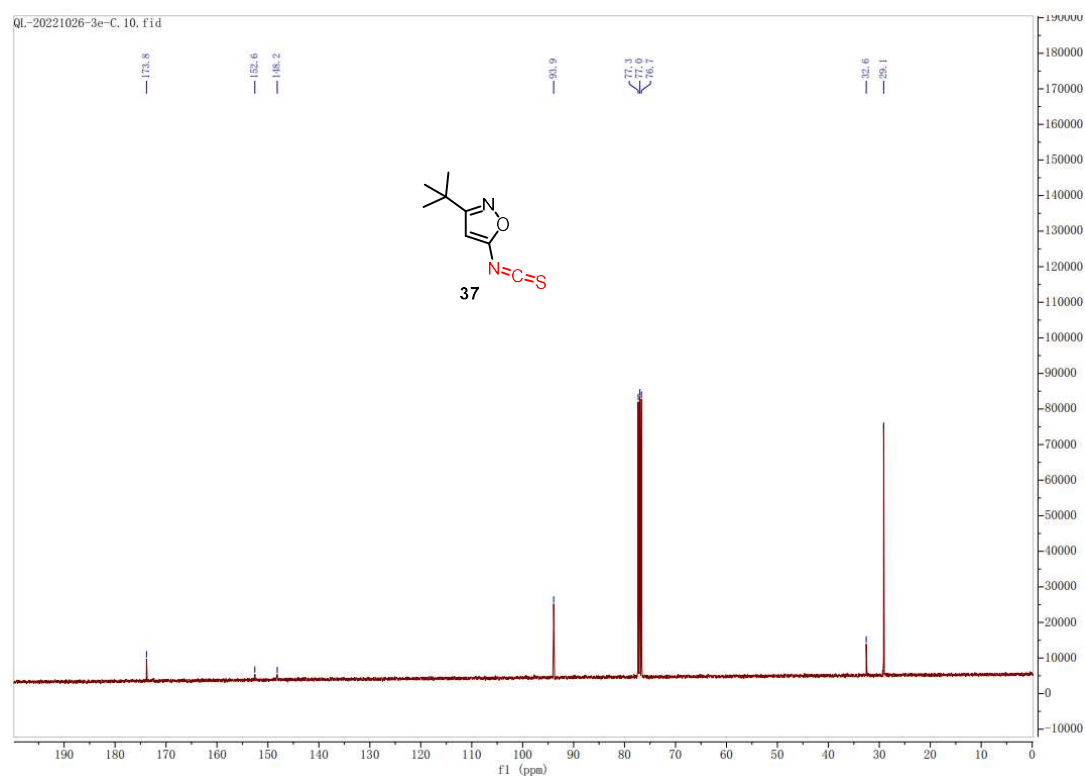

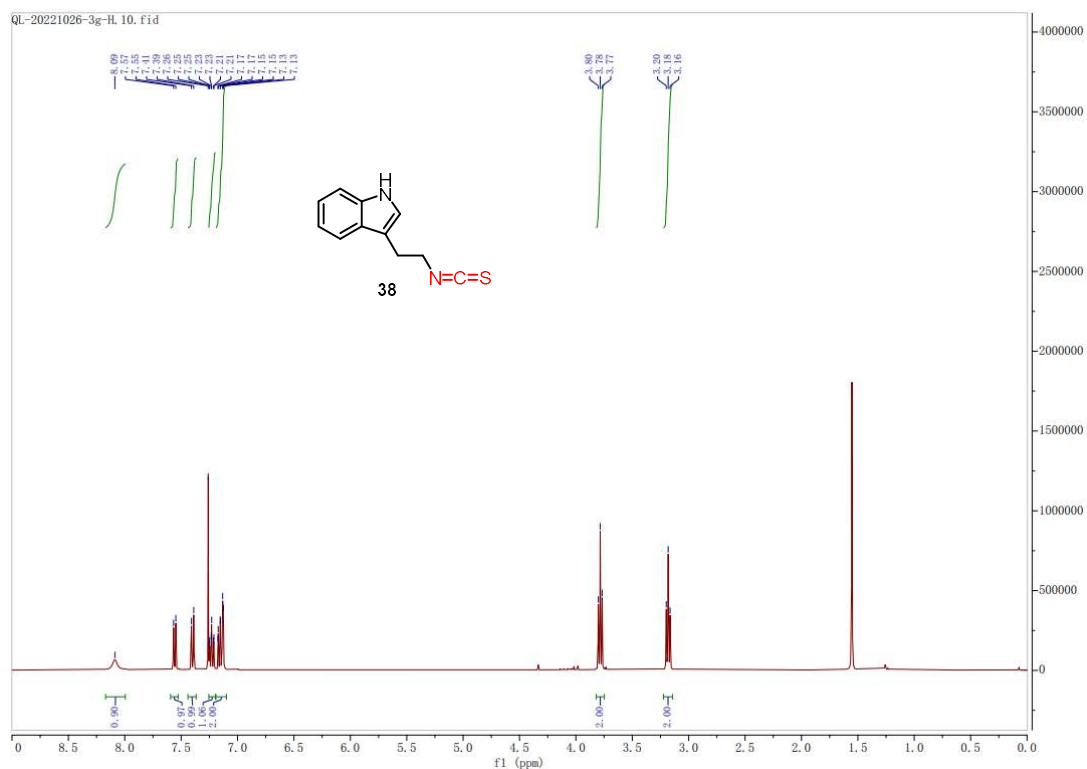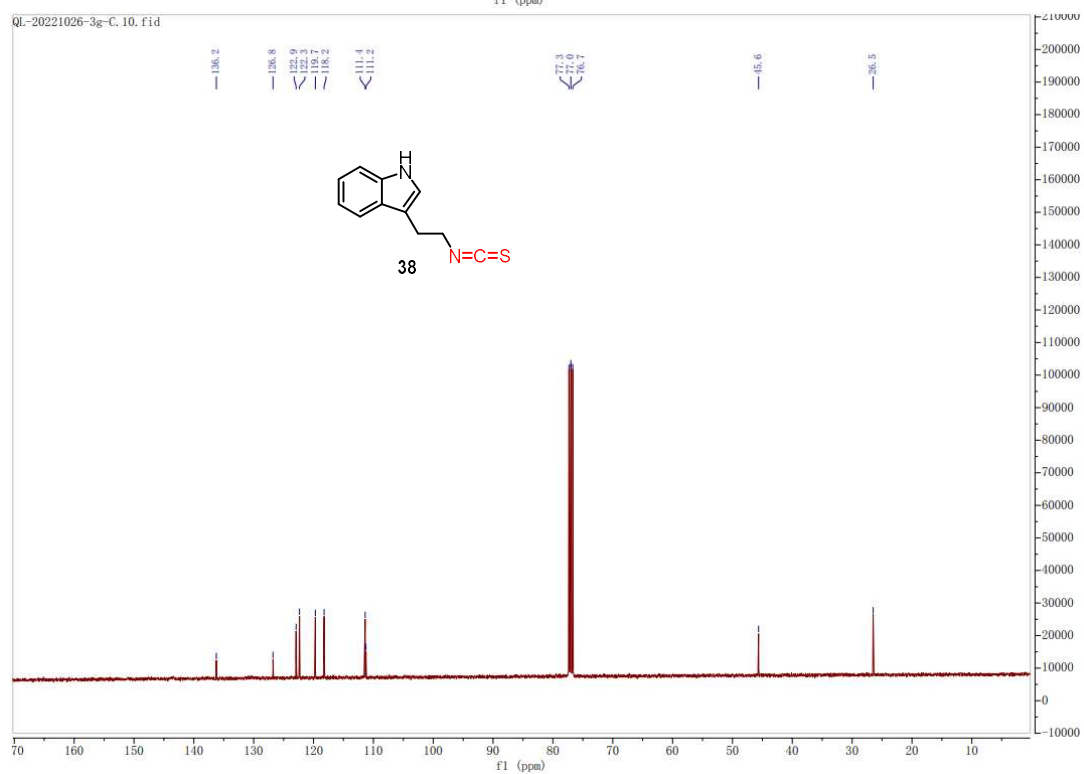



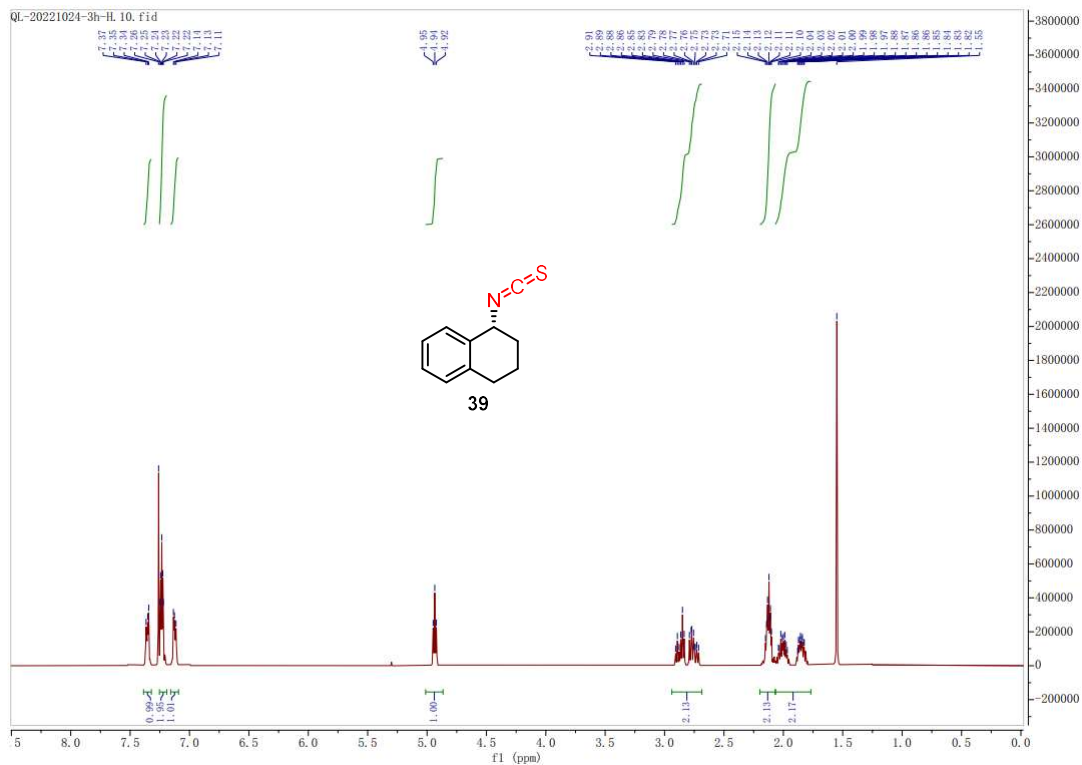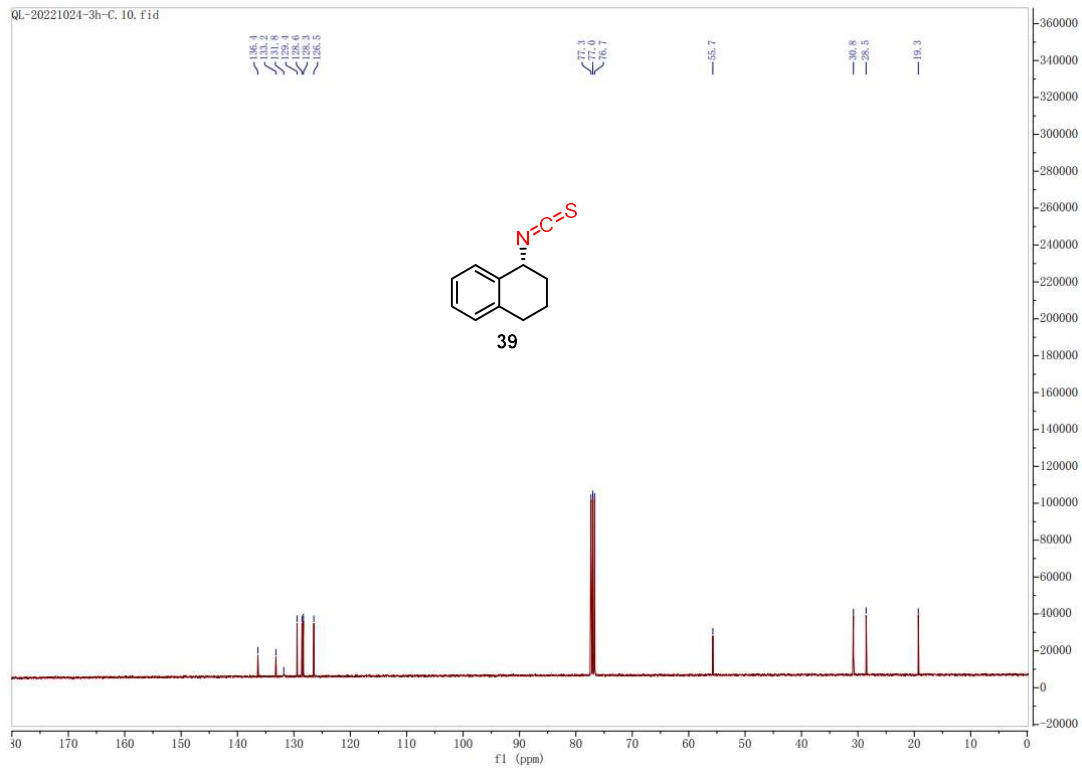

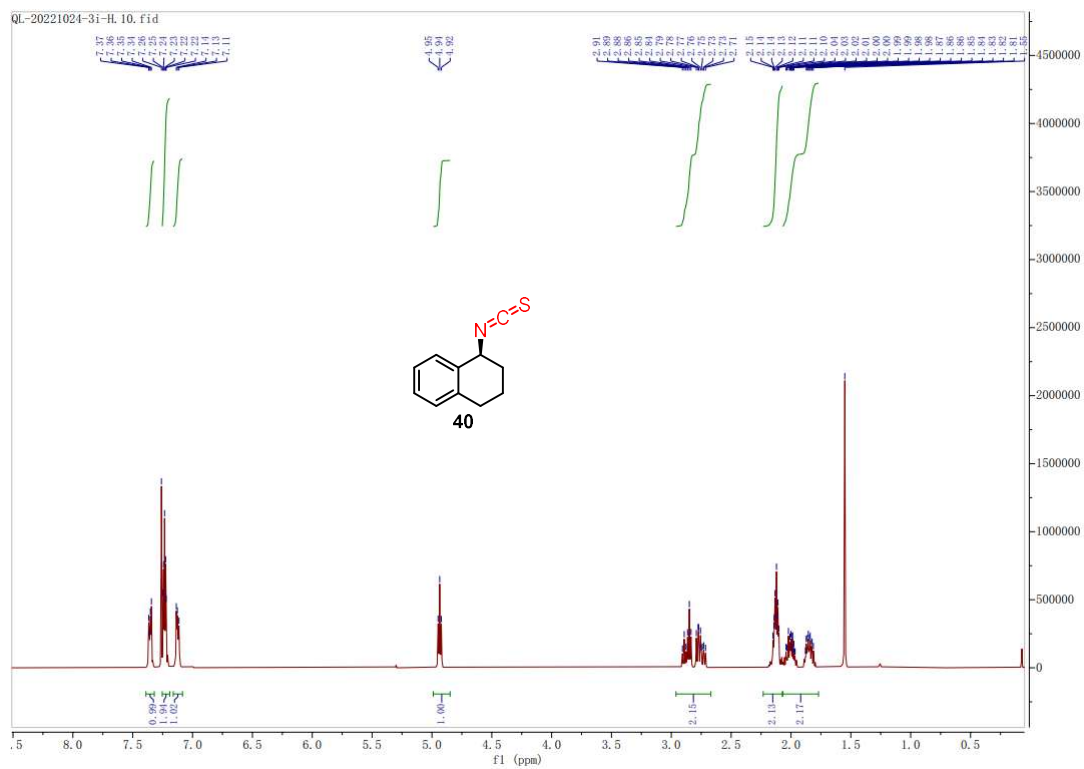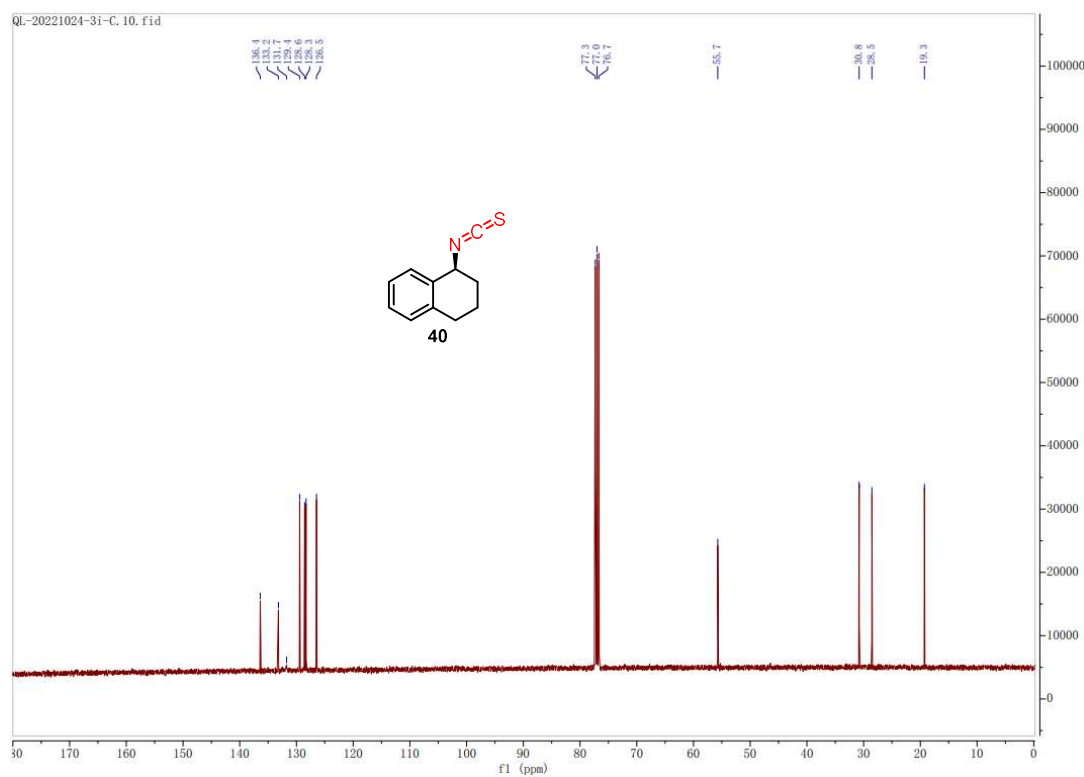

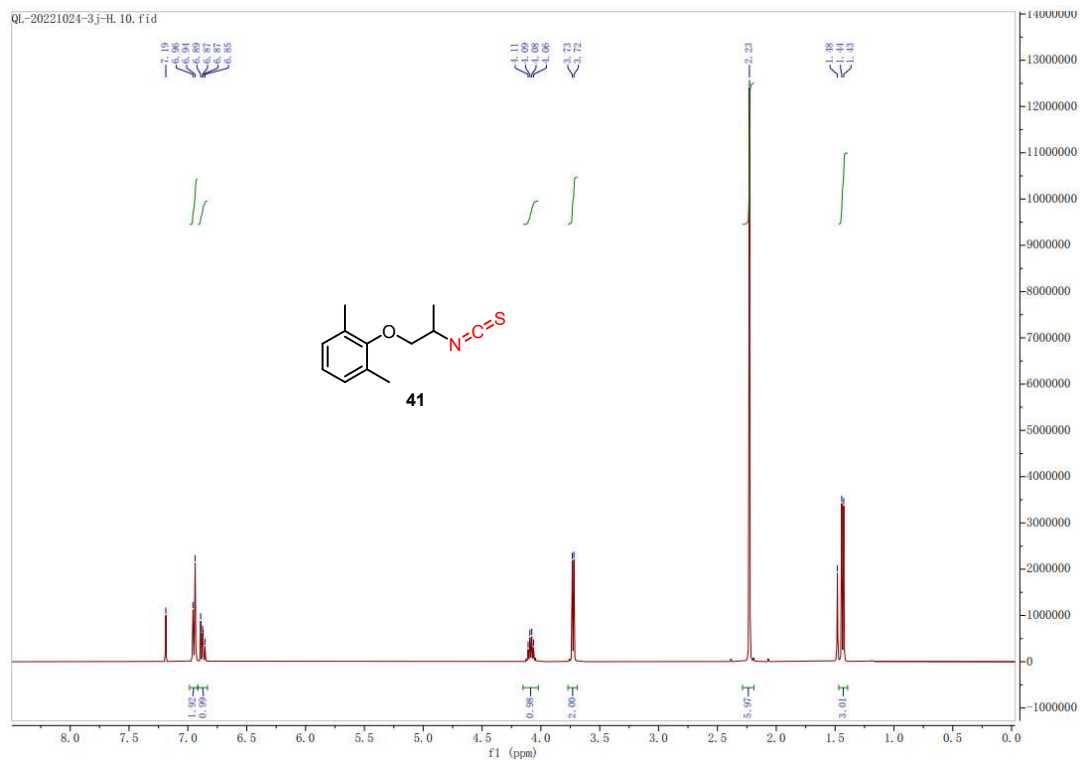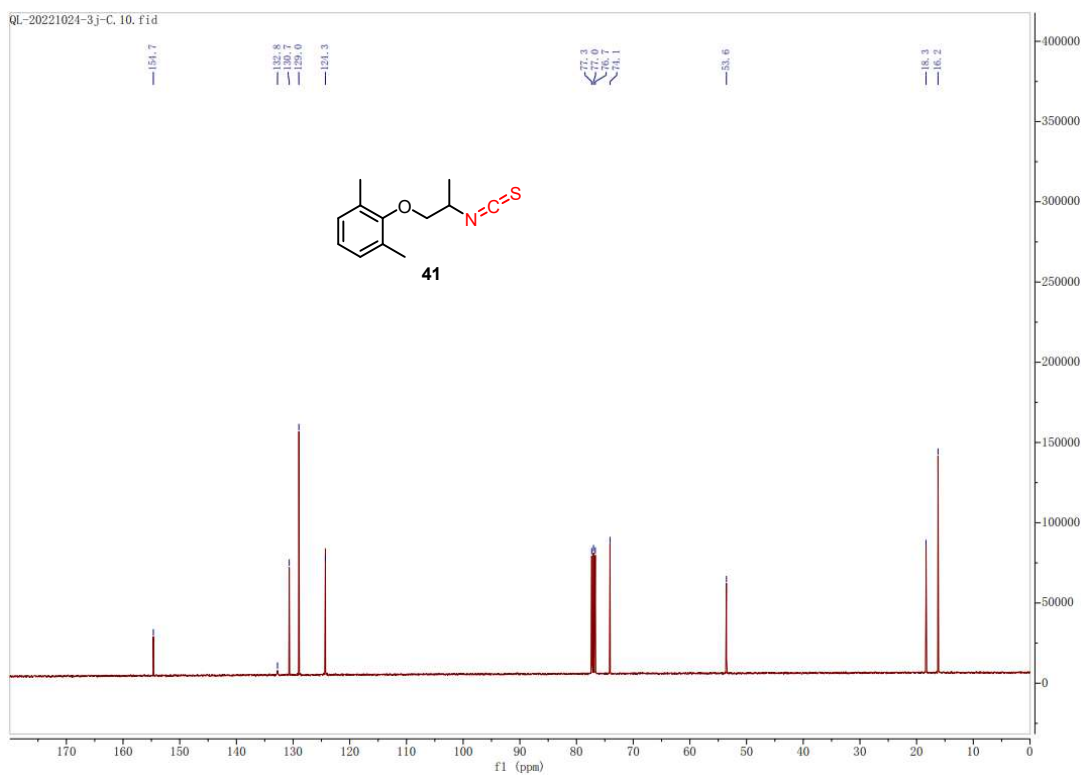

Supplement: Supplementary file 1 [file 6b169770c7951d4c1cab9fdc.pdf]
