# Supplementary material for: Proteolysis-assisted cyclization facilitates site-centric target deconvolution of isothiocyanates
Source: Research Square preprint supplement (doi:10.21203/rs.3.rs-5055115/v1), 2025-10-08
Supplement: Supplementary file 1 [file 08694029c479c9dba1e92fbd.xlsx]

## Sheet: Legend
Supplementary Data 1. Applications of ITCyne for mapping in vitro adducted sites in the HEK293T proteome. HEK293T cell lysates were labeled with 100 μM of ITCyne at 37°C for 2 h with rotation. Probe-labeled protein samples were then processed into tryptic peptides, and conjugated with both light and heavy azido-UV-cleavable-biotin (Az-UV-biotin) reagents (1:1) via CuAAC. The light and heavy ‘Clic…

## Sheet: Data S1
Uniprot Accession #	Site	Genename	Modified sequences	Spectum Count	Description	Interference Score	Identification Score	Ratio hl
Q99832	29	CCT7	C(ITC[C])QVIAEAVR	4	TCPH_HUMAN T-complex protein 1 subunit eta OS=Homo sapiens OX=9606 GN=CCT7 PE=1 SV=2	0.0225	0.12659	1.22
O00571	223	DDX3X	C(ITC[C])AQTGSGK	1	DDX3X_HUMAN ATP-dependent RNA helicase DDX3X OS=Homo sapiens OX=9606 GN=DDX3X PE=1 SV=3	0.13	0.36685	1.39
P60842	134	EIF4A1	C(ITC[C])IGGTNVR	3	IF4A1_HUMAN Eukaryotic initiation factor 4A-I OS=Homo sapiens OX=9606 GN=EIF4A1 PE=1 SV=1	0.02667	0.26679	1.33
Q15233	145	NONO	C(ITC[C])HSASLTVR	4	NONO_HUMAN Non-POU domain-containing octamer-binding protein OS=Homo sapiens OX=9606 GN=NONO PE=1 SV=4	0.0225	0.10428	1.465
Q9UKX7	151	NUP50	C(ITC[C])VGNAYHK	2	NUP50_HUMAN Nuclear pore complex protein Nup50 OS=Homo sapiens OX=9606 GN=NUP50 PE=1 SV=2	0.04	0.37967	0.94
Q15181	274	PPA1	C(ITC[C])TVPTDVDK	2	IPYR_HUMAN Inorganic pyrophosphatase OS=Homo sapiens OX=9606 GN=PPA1 PE=1 SV=2	0.03	0.07813	1.82
P49207	46	RPL34	C(ITC[C])GVCPGR	1	RL34_HUMAN 60S ribosomal protein L34 OS=Homo sapiens OX=9606 GN=RPL34 PE=1 SV=3	0.04	0.21519	1.94
Q92901	253	RPL3L	C(ITC[C])IGAWHPAR	1	RL3L_HUMAN 60S ribosomal protein L3-like OS=Homo sapiens OX=9606 GN=RPL3L PE=2 SV=3	0.03	0.12929	0.81
P04843	477	RPN1	C(ITC[C])ITEQVLTLVNK	2	RPN1_HUMAN Dolichyl-diphosphooligosaccharide--protein glycosyltransferase subunit 1 OS=Homo sapiens OX=9606 GN=RPN1 PE=1 SV=1	0.025	0.01305	1.68
O43592	877	XPOT	C(ITC[C])FLAPLK	1	XPOT_HUMAN Exportin-T OS=Homo sapiens OX=9606 GN=XPOT PE=1 SV=2	0.05	0.29183	1.04
P14618	424	PKM	C(ITC[C])SGAIIVLTK	2	KPYM_HUMAN Pyruvate kinase PKM OS=Homo sapiens OX=9606 GN=PKM PE=1 SV=4	0.035	0.16676	1.355
P62258	98	YWHAE	C(ITC[C])DILDVLDK	1	1433E_HUMAN 14-3-3 protein epsilon OS=Homo sapiens OX=9606 GN=YWHAE PE=1 SV=1	0.03	0.13316	1.6
Q9Y2S7	143	POLDIP2	C(ITC[C])PHISQR	2	PDIP2_HUMAN Polymerase delta-interacting protein 2 OS=Homo sapiens OX=9606 GN=POLDIP2 PE=1 SV=1	0.05	0.13609	1.455
P30154	402	PPP2R1B	C(ITC[C])VNEVIGIR	1	2AAB_HUMAN Serine/threonine-protein phosphatase 2A 65 kDa regulatory subunit A beta isoform OS=Homo sapiens OX=9606 GN=PPP2R1B PE=1 SV=3	0.05	0.17373	1.32
P17987	147	TCP1	C(ITC[C])LINAAK	2	TCPA_HUMAN T-complex protein 1 subunit alpha OS=Homo sapiens OX=9606 GN=TCP1 PE=1 SV=1	0.045	0.31517	1.715
P16615	997	ATP2A2	C(ITC[C])VQPATK	2	AT2A2_HUMAN Sarcoplasmic/endoplasmic reticulum calcium ATPase 2 OS=Homo sapiens OX=9606 GN=ATP2A2 PE=1 SV=1	0.03	0.29997	1.85
P63167	24	DYNLL1	C(ITC[C])ATQALEK	1	DYL1_HUMAN Dynein light chain 1, cytoplasmic OS=Homo sapiens OX=9606 GN=DYNLL1 PE=1 SV=1	0.11	0.40389	1.12
P03247	6	E1B	C(ITC[C])LEDFSAVR	2	E1BS_ADE02 E1B protein, small T-antigen OS=Human adenovirus C serotype 2 OX=10515 GN=E1B PE=1 SV=2	0.01	0.07161	1.36
P26641	266	EEF1G	C(ITC[C])EQALAAEPK	5	EF1G_HUMAN Elongation factor 1-gamma OS=Homo sapiens OX=9606 GN=EEF1G PE=1 SV=3	0.026	0.02364	2.2
Q7Z4Q2	57	HEATR3	C(ITC[C])ACAGLAR	1	HEAT3_HUMAN HEAT repeat-containing protein 3 OS=Homo sapiens OX=9606 GN=HEATR3 PE=1 SV=2	0.04	0.27861	1.42
Q99873	119	PRMT1	C(ITC[C])SSISDYAVK	4	ANM1_HUMAN Protein arginine N-methyltransferase 1 OS=Homo sapiens OX=9606 GN=PRMT1 PE=1 SV=3	0.0375	0.0627	1.29
P62829	125	RPL23	C(ITC[C])ADLWPR	6	RL23_HUMAN 60S ribosomal protein L23 OS=Homo sapiens OX=9606 GN=RPL23 PE=1 SV=1	0.02667	0.28085	1.44
P12268	140	IMPDH2	C(ITC[C])GIPITDTGR	9	IMDH2_HUMAN Inosine-5'-monophosphate dehydrogenase 2 OS=Homo sapiens OX=9606 GN=IMPDH2 PE=1 SV=2	0.02	0.0356	1.26
O00410	944	IPO5	C(ITC[C])TEALPLLVR	2	IPO5_HUMAN Importin-5 OS=Homo sapiens OX=9606 GN=IPO5 PE=1 SV=4	0.07	0.21901	1.43
O15067	270	PFAS	C(ITC[C])DNSSAIQGK	1	PUR4_HUMAN Phosphoribosylformylglycinamidine synthase OS=Homo sapiens OX=9606 GN=PFAS PE=1 SV=4	0.09	0.03229	1.18
Q06830	83	PRDX1	C(ITC[C])HLAWVNTPK	1	PRDX1_HUMAN Peroxiredoxin-1 OS=Homo sapiens OX=9606 GN=PRDX1 PE=1 SV=1	0.06	0.17585	2.19
P61619	13	SEC61A1	C(ITC[C])VILPEIQKPER	10	S61A1_HUMAN Protein transport protein Sec61 subunit alpha isoform 1 OS=Homo sapiens OX=9606 GN=SEC61A1 PE=1 SV=2	0.02	0.13369	1.16
Q13155	291	AIMP2	C(ITC[C])SVTVPANVQR	2	AIMP2_HUMAN Aminoacyl tRNA synthase complex-interacting multifunctional protein 2 OS=Homo sapiens OX=9606 GN=AIMP2 PE=1 SV=2	0.04	0.17006	1.53
P55010	59	EIF5	C(ITC[C])ELGAQTQFDVK	4	IF5_HUMAN Eukaryotic translation initiation factor 5 OS=Homo sapiens OX=9606 GN=EIF5 PE=1 SV=2	0.055	0.16054	1.545
Q96I24	460	FUBP3	C(ITC[C])FPNMAAK	1	FUBP3_HUMAN Far upstream element-binding protein 3 OS=Homo sapiens OX=9606 GN=FUBP3 PE=1 SV=2	0.06	0.17552	1.42
P63096	3	GNAI1	C(ITC[C])TLSAEDK	4	GNAI1_HUMAN Guanine nucleotide-binding protein G(i) subunit alpha-1 OS=Homo sapiens OX=9606 GN=GNAI1 PE=1 SV=2	0.035	0.07126	2.055
P52272	114	HNRNPM	C(ITC[C])AVVEFK	5	HNRPM_HUMAN Heterogeneous nuclear ribonucleoprotein M OS=Homo sapiens OX=9606 GN=HNRNPM PE=1 SV=3	0.014	0.2576	1.85
Q9H8H0	368	NOL11	C(ITC[C])GLGFQNSEQSR	2	NOL11_HUMAN Nucleolar protein 11 OS=Homo sapiens OX=9606 GN=NOL11 PE=1 SV=1	0.06	0.05817	1.615
Q9NVU0	553	POLR3E	C(ITC[C])ASTPVAR	1	RPC5_HUMAN DNA-directed RNA polymerase III subunit RPC5 OS=Homo sapiens OX=9606 GN=POLR3E PE=1 SV=1	0.05	0.31124	1.29
P78527	2880	PRKDC	C(ITC[C])LASLQQPVGIR	1	PRKDC_HUMAN DNA-dependent protein kinase catalytic subunit OS=Homo sapiens OX=9606 GN=PRKDC PE=1 SV=3	0.04	0.32656	1.19
P27635	195	RPL10	IPDGC(ITC[C])GVK LIPDGC(ITC[C])GVK	3	RL10_HUMAN 60S ribosomal protein L10 OS=Homo sapiens OX=9606 GN=RPL10 PE=1 SV=4	0.03667	0.25032	1.08
P62913	150	RPL11	TGC(ITC[C])IGAK	1	RL11_HUMAN 60S ribosomal protein L11 OS=Homo sapiens OX=9606 GN=RPL11 PE=1 SV=2	0.03	0.18187	1.14
Q07020	134	RPL18	GC(ITC[C])GTVLLSGPR	5	RL18_HUMAN 60S ribosomal protein L18 OS=Homo sapiens OX=9606 GN=RPL18 PE=1 SV=2	0.024	0.02086	1.47
P15880	229	RPS2	GC(ITC[C])TATLGNFAK C(ITC[C])TATLGNFAK	8	RS2_HUMAN 40S ribosomal protein S2 OS=Homo sapiens OX=9606 GN=RPS2 PE=1 SV=2	0.015	0.02952	1.425
Q15005	17	SPCS2	C(ITC[C])SGAGGASNCGTGSGR	2	SPCS2_HUMAN Signal peptidase complex subunit 2 OS=Homo sapiens OX=9606 GN=SPCS2 PE=1 SV=3	0.1	0.25855	1.27
Q9Y5L0	125	TNPO3	C(ITC[C])VQTLVEK	2	TNPO3_HUMAN Transportin-3 OS=Homo sapiens OX=9606 GN=TNPO3 PE=1 SV=3	0.035	0.14387	1.475
Q14247	112	CTTN	C(ITC[C])SQVDSVR	2	SRC8_HUMAN Src substrate cortactin OS=Homo sapiens OX=9606 GN=CTTN PE=1 SV=2	0.06	0.05953	1.245
Q9H583	1143	HEATR1	C(ITC[C])AQTVSSVFK	1	HEAT1_HUMAN HEAT repeat-containing protein 1 OS=Homo sapiens OX=9606 GN=HEATR1 PE=1 SV=3	0.08	0.28228	0.77
Q15185	58	PTGES3	C(ITC[C])IDPNDSK	4	TEBP_HUMAN Prostaglandin E synthase 3 OS=Homo sapiens OX=9606 GN=PTGES3 PE=1 SV=1	0.01	0.04681	1.81
Q16576	97	RBBP7	C(ITC[C])DSDKGEFGGFGSVTGK	1	RBBP7_HUMAN Histone-binding protein RBBP7 OS=Homo sapiens OX=9606 GN=RBBP7 PE=1 SV=1	0.1	0.20711	1.13
Q06330	454	RBPJ	C(ITC[C])SAAGAILR	1	SUH_HUMAN Recombining binding protein suppressor of hairless OS=Homo sapiens OX=9606 GN=RBPJ PE=1 SV=3	0.04	0.17975	1.7
P13489	75	RNH1	C(ITC[C])VLQGLQTPSCK	1	RINI_HUMAN Ribonuclease inhibitor OS=Homo sapiens OX=9606 GN=RNH1 PE=1 SV=2	0.09	0.1676	1.21
Q9UBX3	240	SLC25A10	C(ITC[C])AVETAK	1	DIC_HUMAN Mitochondrial dicarboxylate carrier OS=Homo sapiens OX=9606 GN=SLC25A10 PE=1 SV=2	0.09	0.29332	1.12
P53396	20	ACLY	C(ITC[C])TTSAIQNR	2	ACLY_HUMAN ATP-citrate synthase OS=Homo sapiens OX=9606 GN=ACLY PE=1 SV=3	0.035	0.07991	1.375
P55060	842	CSE1L	C(ITC[C])AVGITK	2	XPO2_HUMAN Exportin-2 OS=Homo sapiens OX=9606 GN=CSE1L PE=1 SV=3	0.08	0.11558	1.3
P12268	331	IMPDH2	C(ITC[C])ITQEVLACGR	3	IMDH2_HUMAN Inosine-5'-monophosphate dehydrogenase 2 OS=Homo sapiens OX=9606 GN=IMPDH2 PE=1 SV=2	0.05667	0.06573	1.59
O15381	431	NVL	C(ITC[C])LGIPDEASR	1	NVL_HUMAN Nuclear valosin-containing protein-like OS=Homo sapiens OX=9606 GN=NVL PE=1 SV=1	0.09	0.06306	3.8
P05386	61	RPLP1	C(ITC[C])NVGAGGPAPAAGAAPAGGPAPSTAAAPAEEK	1	RLA1_HUMAN 60S acidic ribosomal protein P1 OS=Homo sapiens OX=9606 GN=RPLP1 PE=1 SV=1	0.11	1e-05	1.79
P49588	773	AARS1	C(ITC[C])LSVMEAK	5	SYAC_HUMAN Alanine--tRNA ligase, cytoplasmic OS=Homo sapiens OX=9606 GN=AARS1 PE=1 SV=2	0.018	0.12088	1.51
P02765	219	AHSG	C(ITC[C])NLLAEK	1	FETUA_HUMAN Alpha-2-HS-glycoprotein OS=Homo sapiens OX=9606 GN=AHSG PE=1 SV=2	0.04	0.2755	1.17
Q13155	168	AIMP2	C(ITC[C])FGEQNK C(ITC[C])FGEQNKK	3	AIMP2_HUMAN Aminoacyl tRNA synthase complex-interacting multifunctional protein 2 OS=Homo sapiens OX=9606 GN=AIMP2 PE=1 SV=2	0.04	0.25159	1.57
Q01433	230	AMPD2	C(ITC[C])GVPFTDLLDAAK	1	AMPD2_HUMAN AMP deaminase 2 OS=Homo sapiens OX=9606 GN=AMPD2 PE=1 SV=2	0.05	0.0587	1.96
Q7Z6K5	183	ARPIN	C(ITC[C])NFTGDGK	1	ARPIN_HUMAN Arpin OS=Homo sapiens OX=9606 GN=ARPIN PE=1 SV=1	0.14	0.29442	1.21
P05023	459	ATP1A1	C(ITC[C])IELCCGSVK	2	AT1A1_HUMAN Sodium/potassium-transporting ATPase subunit alpha-1 OS=Homo sapiens OX=9606 GN=ATP1A1 PE=1 SV=1	0.06	0.14783	1.62
Q5TC12	321	ATPAF1	C(ITC[C])AQNQNK	1	ATPF1_HUMAN ATP synthase mitochondrial F1 complex assembly factor 1 OS=Homo sapiens OX=9606 GN=ATPAF1 PE=1 SV=1	0.02	0.20139	1.56
Q86VP6	802	CAND1	C(ITC[C])VAALTR	1	CAND1_HUMAN Cullin-associated NEDD8-dissociated protein 1 OS=Homo sapiens OX=9606 GN=CAND1 PE=1 SV=2	0.03	0.30152	1.44
Q9H6F5	127	CCDC86	C(ITC[C])SQDQGVLASELAQNK	3	CCD86_HUMAN Coiled-coil domain-containing protein 86 OS=Homo sapiens OX=9606 GN=CCDC86 PE=1 SV=1	0.05333	0.03053	1.11
Q99832	158	CCT7	C(ITC[C])AMTALSSK	3	TCPH_HUMAN T-complex protein 1 subunit eta OS=Homo sapiens OX=9606 GN=CCT7 PE=1 SV=2	0.04333	0.06085	2.18
O75153	1196	CLUH	C(ITC[C])LTQQAVALQR	4	CLU_HUMAN Clustered mitochondria protein homolog OS=Homo sapiens OX=9606 GN=CLUH PE=1 SV=2	0.0375	0.03782	1.91
Q15417	173	CNN3	C(ITC[C])ASQAGMTAYGTR	6	CNN3_HUMAN Calponin-3 OS=Homo sapiens OX=9606 GN=CNN3 PE=1 SV=1	0.06667	0.06037	1.26
P53618	877	COPB1	C(ITC[C])ITPEK	5	COPB_HUMAN Coatomer subunit beta OS=Homo sapiens OX=9606 GN=COPB1 PE=1 SV=3	0.02	0.2571	1.5
Q9Y678	169	COPG1	C(ITC[C])SFDVVK	2	COPG1_HUMAN Coatomer subunit gamma-1 OS=Homo sapiens OX=9606 GN=COPG1 PE=1 SV=1	0.05	0.15623	1.62
Q9ULV4	420	CORO1C	C(ITC[C])DLISIPK	1	COR1C_HUMAN Coronin-1C OS=Homo sapiens OX=9606 GN=CORO1C PE=1 SV=1	0.09	0.24213	1.26
P17812	491	CTPS1	C(ITC[C])LEEQGLK	6	PYRG1_HUMAN CTP synthase 1 OS=Homo sapiens OX=9606 GN=CTPS1 PE=1 SV=2	0.015	0.02224	1.95
Q69YN2	160	CWF19L1	C(ITC[C])VGNFGNSSGEVDTK	4	C19L1_HUMAN CWF19-like protein 1 OS=Homo sapiens OX=9606 GN=CWF19L1 PE=1 SV=2	0.05	0.04049	1.375
Q96F07	98	CYFIP2	C(ITC[C])NEQPNR	1	CYFP2_HUMAN Cytoplasmic FMR1-interacting protein 2 OS=Homo sapiens OX=9606 GN=CYFIP2 PE=1 SV=2	0.02	0.12791	3.41
Q16643	96	DBN1	C(ITC[C])ACASHVAK	2	DREB_HUMAN Drebrin OS=Homo sapiens OX=9606 GN=DBN1 PE=1 SV=4	0.125	0.09612	2.345
Q9BTC0	455	DIDO1	C(ITC[C])GAQAGIK	1	DIDO1_HUMAN Death-inducer obliterator 1 OS=Homo sapiens OX=9606 GN=DIDO1 PE=1 SV=5	0.05	0.07849	1.63
P60981	46	DSTN	C(ITC[C])IIVEEGK	3	DEST_HUMAN Destrin OS=Homo sapiens OX=9606 GN=DSTN PE=1 SV=3	0.04667	0.18173	2.02
P60981	23	DSTN	C(ITC[C])STPEEIKK C(ITC[C])STPEEIK	6	DEST_HUMAN Destrin OS=Homo sapiens OX=9606 GN=DSTN PE=1 SV=3	0.04	0.18715	1
O60841	749	EIF5B	C(ITC[C])PFIVALNK	3	IF2P_HUMAN Eukaryotic translation initiation factor 5B OS=Homo sapiens OX=9606 GN=EIF5B PE=1 SV=4	0.07667	0.2257	0.86
Q9BQ52	136	ELAC2	C(ITC[C])VLSGPPQLEK	3	RNZ2_HUMAN Zinc phosphodiesterase ELAC protein 2 OS=Homo sapiens OX=9606 GN=ELAC2 PE=1 SV=2	0.05667	0.20393	1.65
Q9NV70	650	EXOC1	C(ITC[C])ISNQIR	4	EXOC1_HUMAN Exocyst complex component 1 OS=Homo sapiens OX=9606 GN=EXOC1 PE=1 SV=4	0.06	0.19334	1.455
O75369	1617	FLNB	C(ITC[C])LATGPGIASTVK	1	FLNB_HUMAN Filamin-B OS=Homo sapiens OX=9606 GN=FLNB PE=1 SV=2	0.05	0.09019	1.51
Q9H0Q3	63	FXYD6	C(ITC[C])SFNQKPR	2	FXYD6_HUMAN FXYD domain-containing ion transport regulator 6 OS=Homo sapiens OX=9606 GN=FXYD6 PE=1 SV=1	0.06	0.21369	1.2
Q92616	2558	GCN1	C(ITC[C])LQNPSSDIR	4	GCN1_HUMAN eIF-2-alpha kinase activator GCN1 OS=Homo sapiens OX=9606 GN=GCN1 PE=1 SV=6	0.03	0.15684	1.655
P51858	12	HDGF	C(ITC[C])GDLVFAK	1	HDGF_HUMAN Hepatoma-derived growth factor OS=Homo sapiens OX=9606 GN=HDGF PE=1 SV=1	0.04	0.27492	1.38
Q9NRZ9	205	HELLS	C(ITC[C])NGQPVPFQQPK	2	HELLS_HUMAN Lymphoid-specific helicase OS=Homo sapiens OX=9606 GN=HELLS PE=1 SV=1	0.03	0.12423	1.24
P30519	265	HMOX2	C(ITC[C])PFYAAEQDK	4	HMOX2_HUMAN Heme oxygenase 2 OS=Homo sapiens OX=9606 GN=HMOX2 PE=1 SV=2	0.0675	0.1591	1.175
P11142	574	HSPA8	C(ITC[C])NEIINWLDK	1	HSP7C_HUMAN Heat shock cognate 71 kDa protein OS=Homo sapiens OX=9606 GN=HSPA8 PE=1 SV=1	0.03	0.08757	0.99
Q12906	203	ILF3	C(ITC[C])LAALASLR	2	ILF3_HUMAN Interleukin enhancer-binding factor 3 OS=Homo sapiens OX=9606 GN=ILF3 PE=1 SV=3	0.06	0.1299	1.15
Q8WZA9	373	IRGQ	C(ITC[C])SAGSQK	1	IRGQ_HUMAN Immunity-related GTPase family Q protein OS=Homo sapiens OX=9606 GN=IRGQ PE=1 SV=1	0.09	0.12248	1.31
Q9H9L3	168	ISG20L2	C(ITC[C])SGASQK	2	I20L2_HUMAN Interferon-stimulated 20 kDa exonuclease-like 2 OS=Homo sapiens OX=9606 GN=ISG20L2 PE=1 SV=1	0.02	0.13698	1.56
Q14145	288	KEAP1	C(ITC[C])EILQSDSR	1	KEAP1_HUMAN Kelch-like ECH-associated protein 1 OS=Homo sapiens OX=9606 GN=KEAP1 PE=1 SV=2	0.1	0.31887	1.77
Q92945	436	KHSRP	C(ITC[C])GLVIGR	3	FUBP2_HUMAN Far upstream element-binding protein 2 OS=Homo sapiens OX=9606 GN=KHSRP PE=1 SV=4	0.02333	0.22109	1.88
P52732	740	KIF11	C(ITC[C])ENIQKPLSSVQENIQQK	1	KIF11_HUMAN Kinesin-like protein KIF11 OS=Homo sapiens OX=9606 GN=KIF11 PE=1 SV=2	0.11	0.02131	1.34
P27816	635	MAP4	C(ITC[C])SLPAEEDSVLEK	3	MAP4_HUMAN Microtubule-associated protein 4 OS=Homo sapiens OX=9606 GN=MAP4 PE=1 SV=3	0.02	0.03266	1.1
Q9NYP9	25	MIS18A	C(ITC[C])SDSSLLGK	1	MS18A_HUMAN Protein Mis18-alpha OS=Homo sapiens OX=9606 GN=MIS18A PE=1 SV=1	0.06	0.28235	1.33
P46013	958	MKI67	C(ITC[C])APMSDLTDLK	3	KI67_HUMAN Proliferation marker protein Ki-67 OS=Homo sapiens OX=9606 GN=MKI67 PE=1 SV=2	0.08	0.13769	1.52
Q96T76	760	MMS19	C(ITC[C])FAGLLNK	1	MMS19_HUMAN MMS19 nucleotide excision repair protein homolog OS=Homo sapiens OX=9606 GN=MMS19 PE=1 SV=2	0.11	0.21321	3.77
Q15021	286	NCAPD2	C(ITC[C])PQELSR	7	CND1_HUMAN Condensin complex subunit 1 OS=Homo sapiens OX=9606 GN=NCAPD2 PE=1 SV=3	0.01857	0.10003	1.2
P78316	457	NOP14	C(ITC[C])NHPSLAEGNK	2	NOP14_HUMAN Nucleolar protein 14 OS=Homo sapiens OX=9606 GN=NOP14 PE=1 SV=3	0.06	0.0048	1.82
Q96G61	3	NUDT11	C(ITC[C])KPNQTR	1	NUD11_HUMAN Diphosphoinositol polyphosphate phosphohydrolase 3-beta OS=Homo sapiens OX=9606 GN=NUDT11 PE=1 SV=1	0.13	0.29124	1.17
O75694	974	NUP155	C(ITC[C])ITDTLQELVNQSK	1	NU155_HUMAN Nuclear pore complex protein Nup155 OS=Homo sapiens OX=9606 GN=NUP155 PE=1 SV=1	0.06	0.00064	1.18
O95453	169	PARN	C(ITC[C])PVTIPEDQKK	1	PARN_HUMAN Poly(A)-specific ribonuclease PARN OS=Homo sapiens OX=9606 GN=PARN PE=1 SV=1	0.05	0.34348	1.36
P12004	81	PCNA	C(ITC[C])AGNEDIITLR	4	PCNA_HUMAN Proliferating cell nuclear antigen OS=Homo sapiens OX=9606 GN=PCNA PE=1 SV=1	0.03	0.00623	1
O00541	153	PES1	C(ITC[C])HVQTIQLCR	6	PESC_HUMAN Pescadillo homolog OS=Homo sapiens OX=9606 GN=PES1 PE=1 SV=1	0.03833	0.08233	1.27
P14618	423	PKM	C(ITC[C])CSGAIIVLTK	4	KPYM_HUMAN Pyruvate kinase PKM OS=Homo sapiens OX=9606 GN=PKM PE=1 SV=4	0.04	0.09627	1.745
P53350	67	PLK1	C(ITC[C])FEISDADTK	2	PLK1_HUMAN Serine/threonine-protein kinase PLK1 OS=Homo sapiens OX=9606 GN=PLK1 PE=1 SV=1	0.02	0.01926	1.1
Q06203	100	PPAT	C(ITC[C])ELENCQPFVVETLHGK	1	PUR1_HUMAN Amidophosphoribosyltransferase OS=Homo sapiens OX=9606 GN=PPAT PE=1 SV=1	0.11	0.06621	1.05
O15355	13	PPM1G	C(ITC[C])SGDGVGAPR	4	PPM1G_HUMAN Protein phosphatase 1G OS=Homo sapiens OX=9606 GN=PPM1G PE=1 SV=1	0.0325	0.02741	1.915
Q5H9R7	844	PPP6R3	C(ITC[C])AAPRPPSSSPEQR	2	PP6R3_HUMAN Serine/threonine-protein phosphatase 6 regulatory subunit 3 OS=Homo sapiens OX=9606 GN=PPP6R3 PE=1 SV=2	0.095	0.32973	1.22
P78527	1312	PRKDC	C(ITC[C])FGTGAAGNR	6	PRKDC_HUMAN DNA-dependent protein kinase catalytic subunit OS=Homo sapiens OX=9606 GN=PRKDC PE=1 SV=3	0.02	0.02185	1.415
P78527	1335	PRKDC	C(ITC[C])TVVVR	2	PRKDC_HUMAN DNA-dependent protein kinase catalytic subunit OS=Homo sapiens OX=9606 GN=PRKDC PE=1 SV=3	0.01	0.33609	1.31
P78527	4106	PRKDC	C(ITC[C])LMDQATDPNILGR	1	PRKDC_HUMAN DNA-dependent protein kinase catalytic subunit OS=Homo sapiens OX=9606 GN=PRKDC PE=1 SV=3	0.09	0.00289	1.67
P48556	112	PSMD8	C(ITC[C])GEELGR	1	PSMD8_HUMAN 26S proteasome non-ATPase regulatory subunit 8 OS=Homo sapiens OX=9606 GN=PSMD8 PE=1 SV=2	0.12	0.06005	0.85
Q9UL46	91	PSME2	C(ITC[C])GFLPGNEK	2	PSME2_HUMAN Proteasome activator complex subunit 2 OS=Homo sapiens OX=9606 GN=PSME2 PE=1 SV=4	0.04	0.048	1.59
Q06124	318	PTPN11	C(ITC[C])NNSKPK	1	PTN11_HUMAN Tyrosine-protein phosphatase non-receptor type 11 OS=Homo sapiens OX=9606 GN=PTPN11 PE=1 SV=3	0.04	0.22951	1.66
Q9BZE2	420	PUS3	C(ITC[C])QGLESR	1	PUS3_HUMAN tRNA pseudouridine(38/39) synthase OS=Homo sapiens OX=9606 GN=PUS3 PE=1 SV=3	0.04	0.34092	1.27
Q2TAL8	713	QRICH1	C(ITC[C])PQSVK	2	QRIC1_HUMAN Glutamine-rich protein 1 OS=Homo sapiens OX=9606 GN=QRICH1 PE=1 SV=1	0.025	0.25342	1.275
P52756	766	RBM5	C(ITC[C])QGITAPIEAQVR	1	RBM5_HUMAN RNA-binding protein 5 OS=Homo sapiens OX=9606 GN=RBM5 PE=1 SV=2	0.03	0.04732	1.17
P50914	54	RPL14	C(ITC[C])MQLTDFILK	2	RL14_HUMAN 60S ribosomal protein L14 OS=Homo sapiens OX=9606 GN=RPL14 PE=1 SV=4	0.04	0.00196	1.61
Q02543	22	RPL18A	C(ITC[C])HTPPLYR	23	RL18A_HUMAN 60S ribosomal protein L18a OS=Homo sapiens OX=9606 GN=RPL18A PE=1 SV=2	0.04348	0.12001	1.68
P83731	36	RPL24	C(ITC[C])ESAFLSK	8	RL24_HUMAN 60S ribosomal protein L24 OS=Homo sapiens OX=9606 GN=RPL24 PE=1 SV=1	0.0275	0.10569	1.46
P05388	27	RPLP0	C(ITC[C])FIVGADNVGSK	6	RLA0_HUMAN 60S acidic ribosomal protein P0 OS=Homo sapiens OX=9606 GN=RPLP0 PE=1 SV=1	0.04167	0.00465	1.445
P62280	60	RPS11	C(ITC[C])PFTGNVSIR	8	RS11_HUMAN 40S ribosomal protein S11 OS=Homo sapiens OX=9606 GN=RPS11 PE=1 SV=3	0.01	0.00754	1.37
P62244	72	RPS15A	C(ITC[C])GVISPR	2	RS15A_HUMAN 40S ribosomal protein S15a OS=Homo sapiens OX=9606 GN=RPS15A PE=1 SV=2	0.02	0.24789	1.49
P63220	17	RPS21	C(ITC[C])SASNR	3	RS21_HUMAN 40S ribosomal protein S21 OS=Homo sapiens OX=9606 GN=RPS21 PE=1 SV=1	0.01	0.31774	1.52
Q15020	670	SART3	C(ITC[C])AAVDVEPPSK	9	SART3_HUMAN Squamous cell carcinoma antigen recognized by T-cells 3 OS=Homo sapiens OX=9606 GN=SART3 PE=1 SV=1	0.07111	0.06973	1.32
Q6IQ49	415	SDE2	C(ITC[C])GGTLQER	4	SDE2_HUMAN Replication stress response regulator SDE2 OS=Homo sapiens OX=9606 GN=SDE2 PE=1 SV=1	0.055	0.08247	1.48
O15027	1522	SEC16A	C(ITC[C])LQNENLIDK	2	SC16A_HUMAN Protein transport protein Sec16A OS=Homo sapiens OX=9606 GN=SEC16A PE=1 SV=4	0.055	0.17704	1.52
Q12874	274	SF3A3	C(ITC[C])GGTLEER	6	SF3A3_HUMAN Splicing factor 3A subunit 3 OS=Homo sapiens OX=9606 GN=SF3A3 PE=1 SV=1	0.015	0.12985	2.39
P43003	375	SLC1A3	C(ITC[C])IEENNGVDKR	2	EAA1_HUMAN Excitatory amino acid transporter 1 OS=Homo sapiens OX=9606 GN=SLC1A3 PE=1 SV=1	0.05	0.05091	0.99
Q15758	363	SLC1A5	C(ITC[C])VEENNGVAK	1	AAAT_HUMAN Neutral amino acid transporter B(0) OS=Homo sapiens OX=9606 GN=SLC1A5 PE=1 SV=2	0.04	0.02762	3.46
Q9Y3F4	305	STRAP	C(ITC[C])VLPEEDSGELAKPK	1	STRAP_HUMAN Serine-threonine kinase receptor-associated protein OS=Homo sapiens OX=9606 GN=STRAP PE=1 SV=1	0.18	0.24792	1.51
O43815	765	STRN	C(ITC[C])YIASAGADALAK	5	STRN_HUMAN Striatin OS=Homo sapiens OX=9606 GN=STRN PE=1 SV=4	0.034	0.10482	1.3
Q9Y490	1087	TLN1	C(ITC[C])TQDLGNSTK	1	TLN1_HUMAN Talin-1 OS=Homo sapiens OX=9606 GN=TLN1 PE=1 SV=3	0.35	0.3304	1.4
Q9NYL9	231	TMOD3	C(ITC[C])FSLAATR	2	TMOD3_HUMAN Tropomodulin-3 OS=Homo sapiens OX=9606 GN=TMOD3 PE=1 SV=1	0.04	0.33683	1.4
Q92973	386	TNPO1	C(ITC[C])SAAALDVLANVYR	2	TNPO1_HUMAN Transportin-1 OS=Homo sapiens OX=9606 GN=TNPO1 PE=1 SV=2	0.11	0.01292	1.32
Q9H0U9	160	TSPYL1	C(ITC[C])ATVSAAVAER	1	TSYL1_HUMAN Testis-specific Y-encoded-like protein 1 OS=Homo sapiens OX=9606 GN=TSPYL1 PE=1 SV=3	0.06	0.01051	1.31
P10599	73	TXN	C(ITC[C])MPTFQFFK	6	THIO_HUMAN Thioredoxin OS=Homo sapiens OX=9606 GN=TXN PE=1 SV=3	0.03667	0.0602	3.37
P62987	115	UBA52	C(ITC[C])GHTNNLRPK C(ITC[C])GHTNNLR	2	RL40_HUMAN Ubiquitin-60S ribosomal protein L40 OS=Homo sapiens OX=9606 GN=UBA52 PE=1 SV=2	0.06	0.07563	1.57
O75691	1794	UTP20	C(ITC[C])LASTTK	1	UTP20_HUMAN Small subunit processome component 20 homolog OS=Homo sapiens OX=9606 GN=UTP20 PE=1 SV=3	0.3	0.26337	1.26
Q8N0U8	58	VKORC1L1	C(ITC[C])SAALASR	2	VKORL_HUMAN Vitamin K epoxide reductase complex subunit 1-like protein 1 OS=Homo sapiens OX=9606 GN=VKORC1L1 PE=1 SV=2	0.11	0.05304	0.97
O75152	636	ZC3H11A	C(ITC[C])AAQTLEK	3	ZC11A_HUMAN Zinc finger CCCH domain-containing protein 11A OS=Homo sapiens OX=9606 GN=ZC3H11A PE=1 SV=3	0.03667	0.12097	1.56
O43264	404	ZW10	C(ITC[C])QDVIVAAR	1	ZW10_HUMAN Centromere/kinetochore protein zw10 homolog OS=Homo sapiens OX=9606 GN=ZW10 PE=1 SV=3	0.08	0.0152	0.77
Q96HN2	353	AHCYL2	C(ITC[C])VPAMNVNDSVTK	4	SAHH3_HUMAN Adenosylhomocysteinase 3 OS=Homo sapiens OX=9606 GN=AHCYL2 PE=1 SV=1	0.04	0.16013	1.3
Q99832	450	CCT7	C(ITC[C])DNAGFDATNILNK	2	TCPH_HUMAN T-complex protein 1 subunit eta OS=Homo sapiens OX=9606 GN=CCT7 PE=1 SV=2	0.04	0.00107	1.24
P50416	304	CPT1A	C(ITC[C])SAQWER	1	CPT1A_HUMAN Carnitine O-palmitoyltransferase 1, liver isoform OS=Homo sapiens OX=9606 GN=CPT1A PE=1 SV=2	0.06	0.31026	1
P33240	150	CSTF2	C(ITC[C])VQNSPQEAR	2	CSTF2_HUMAN Cleavage stimulation factor subunit 2 OS=Homo sapiens OX=9606 GN=CSTF2 PE=1 SV=1	0.03	0.08457	1.76
Q9UBT7	667	CTNNAL1	C(ITC[C])HQLQTVTK	2	CTNL1_HUMAN Alpha-catulin OS=Homo sapiens OX=9606 GN=CTNNAL1 PE=1 SV=2	0.08	0.20154	1
P52538	135	DBP	LC(ITC[C])SAVGK	3	DNBI_HHV6Z Major DNA-binding protein OS=Human herpesvirus 6B (strain Z29) OX=36351 GN=DBP PE=3 SV=1	0.07667	0.21496	1.93
Q8WVV9	464	HNRNPLL	C(ITC[C])VTEETFTK	1	HNRLL_HUMAN Heterogeneous nuclear ribonucleoprotein L-like OS=Homo sapiens OX=9606 GN=HNRNPLL PE=1 SV=1	0.07	0.29004	2.54
Q14974	585	KPNB1	C(ITC[C])ATLQNVLR	4	IMB1_HUMAN Importin subunit beta-1 OS=Homo sapiens OX=9606 GN=KPNB1 PE=1 SV=2	0.055	0.04613	1.235
Q9BQG0	109	MYBBP1A	C(ITC[C])SILQQIQEK	1	MBB1A_HUMAN Myb-binding protein 1A OS=Homo sapiens OX=9606 GN=MYBBP1A PE=1 SV=2	0.06	0.00428	1.19
Q29RF7	14	PDS5A	C(ITC[C])GVVSADGK	1	PDS5A_HUMAN Sister chromatid cohesion protein PDS5 homolog A OS=Homo sapiens OX=9606 GN=PDS5A PE=1 SV=1	0.1	0.13133	1.12
A6NKT7	515	RGPD3	C(ITC[C])LPLPVCK	1	RGPD3_HUMAN RanBP2-like and GRIP domain-containing protein 3 OS=Homo sapiens OX=9606 GN=RGPD3 PE=3 SV=2	0.02	0.27661	1.21
P62913	21	RPL11	C(ITC[C])LNICVGESGDR	1	RL11_HUMAN 60S ribosomal protein L11 OS=Homo sapiens OX=9606 GN=RPL11 PE=1 SV=2	0.04	0.06725	1.28
P83731	6	RPL24	C(ITC[C])SFSGYK	2	RL24_HUMAN 60S ribosomal protein L24 OS=Homo sapiens OX=9606 GN=RPL24 PE=1 SV=1	0.04	0.29436	1.4
P23396	97	RPS3	C(ITC[C])AIAQAESLR	5	RS3_HUMAN 40S ribosomal protein S3 OS=Homo sapiens OX=9606 GN=RPS3 PE=1 SV=2	0.048	0.0115	1.85
Q8NI27	743	THOC2	C(ITC[C])LLMAQQR	1	THOC2_HUMAN THO complex subunit 2 OS=Homo sapiens OX=9606 GN=THOC2 PE=1 SV=2	0.09	0.1795	0.98
Q7Z2W4	38	ZC3HAV1	C(ITC[C])EVLQVAGPDR	2	ZCCHV_HUMAN Zinc finger CCCH-type antiviral protein 1 OS=Homo sapiens OX=9606 GN=ZC3HAV1 PE=1 SV=3	0.095	0.14893	1.81
P04080	3	CSTB	C(ITC[C])GAPSATQPATAETQHIADQVR	2	CYTB_HUMAN Cystatin-B OS=Homo sapiens OX=9606 GN=CSTB PE=1 SV=2	0.03	0.00026	2.08
P68104	411	EEF1A1	C(ITC[C])VESFSDYPPLGR	13	EF1A1_HUMAN Elongation factor 1-alpha 1 OS=Homo sapiens OX=9606 GN=EEF1A1 PE=1 SV=1	0.03538	0.0466	1.36
P49915	554	GMPS	C(ITC[C])HNVNR	1	GUAA_HUMAN GMP synthase [glutamine-hydrolyzing] OS=Homo sapiens OX=9606 GN=GMPS PE=1 SV=1	0.25	0.29347	1.46
Q00839	594	HNRNPU	C(ITC[C])LFAGFQR	2	HNRPU_HUMAN Heterogeneous nuclear ribonucleoprotein U OS=Homo sapiens OX=9606 GN=HNRNPU PE=1 SV=6	0.02	0.2474	1.07
P60660	2	MYL6	C(ITC[C])DFTEDQTAEFK	1	MYL6_HUMAN Myosin light polypeptide 6 OS=Homo sapiens OX=9606 GN=MYL6 PE=1 SV=2	0.07	0.01135	2.13
Q9Y490	1353	TLN1	C(ITC[C])TQQAPGQK	1	TLN1_HUMAN Talin-1 OS=Homo sapiens OX=9606 GN=TLN1 PE=1 SV=3	0.03	0.222	1.14
Q8TBC4	237	UBA3	C(ITC[C])TIASMPR	1	UBA3_HUMAN NEDD8-activating enzyme E1 catalytic subunit OS=Homo sapiens OX=9606 GN=UBA3 PE=1 SV=2	0.04	0.17938	1.17
P45880	13	VDAC2	C(ITC[C])IPPSYADLGK	22	VDAC2_HUMAN Voltage-dependent anion-selective channel protein 2 OS=Homo sapiens OX=9606 GN=VDAC2 PE=1 SV=2	0.01864	0.1086	1.22
Q9Y277	2	VDAC3	C(ITC[C])NTPTYCDLGK	5	VDAC3_HUMAN Voltage-dependent anion-selective channel protein 3 OS=Homo sapiens OX=9606 GN=VDAC3 PE=1 SV=1	0.032	0.13234	1.43
P49368	455	CCT3	C(ITC[C])GASTIR	1	TCPG_HUMAN T-complex protein 1 subunit gamma OS=Homo sapiens OX=9606 GN=CCT3 PE=1 SV=4	0.03	0.32058	1.45
P50416	96	CPT1A	C(ITC[C])MSSQTK	1	CPT1A_HUMAN Carnitine O-palmitoyltransferase 1, liver isoform OS=Homo sapiens OX=9606 GN=CPT1A PE=1 SV=2	0.08	0.26476	1.19
P04406	156	GAPDH	C(ITC[C])LAPLAK	2	G3P_HUMAN Glyceraldehyde-3-phosphate dehydrogenase OS=Homo sapiens OX=9606 GN=GAPDH PE=1 SV=3	0.02	0.18451	1.15
Q00839	453	HNRNPU	C(ITC[C])AVEFNFGQK	1	HNRPU_HUMAN Heterogeneous nuclear ribonucleoprotein U OS=Homo sapiens OX=9606 GN=HNRNPU PE=1 SV=6	0.02	0.01363	1.24
P49321	708	NASP	C(ITC[C])VTDISHLVR	1	NASP_HUMAN Nuclear autoantigenic sperm protein OS=Homo sapiens OX=9606 GN=NASP PE=1 SV=2	0.02	0.3751	0.87
O43175	369	PHGDH	C(ITC[C])LSPAVIVGLLK	1	SERA_HUMAN D-3-phosphoglycerate dehydrogenase OS=Homo sapiens OX=9606 GN=PHGDH PE=1 SV=4	0.24	0.11142	1.53
Q00765	18	REEP5	C(ITC[C])MTDLLAK	8	REEP5_HUMAN Receptor expression-enhancing protein 5 OS=Homo sapiens OX=9606 GN=REEP5 PE=1 SV=3	0.01875	0.07786	1.325
P62829	28	RPL23	C(ITC[C])ADNTGAK	1	RL23_HUMAN 60S ribosomal protein L23 OS=Homo sapiens OX=9606 GN=RPL23 PE=1 SV=1	0.01	0.0682	2.94
P61247	96	RPS3A	C(ITC[C])LTNFHGMDLTR	2	RS3A_HUMAN 40S ribosomal protein S3a OS=Homo sapiens OX=9606 GN=RPS3A PE=1 SV=2	0.07	0.06774	1.12
O75533	1035	SF3B1	C(ITC[C])IDLVGR	2	SF3B1_HUMAN Splicing factor 3B subunit 1 OS=Homo sapiens OX=9606 GN=SF3B1 PE=1 SV=3	0.01	0.22279	1.56
O14980	34	XPO1	C(ITC[C])LYHGEGAQQR	1	XPO1_HUMAN Exportin-1 OS=Homo sapiens OX=9606 GN=XPO1 PE=1 SV=1	0.11	0.01048	1
P18621	144	RPL17	C(ITC[C])HIEMILTEK	1	RL17_HUMAN 60S ribosomal protein L17 OS=Homo sapiens OX=9606 GN=RPL17 PE=1 SV=3	0.09	0.06478	0.89
Q14204	1977	DYNC1H1	C(ITC[C])IQEALR	1	DYHC1_HUMAN Cytoplasmic dynein 1 heavy chain 1 OS=Homo sapiens OX=9606 GN=DYNC1H1 PE=1 SV=5	0.05	0.19276	1.46
Q00839	562	HNRNPU	APQC(ITC[C])LGK	2	HNRPU_HUMAN Heterogeneous nuclear ribonucleoprotein U OS=Homo sapiens OX=9606 GN=HNRNPU PE=1 SV=6	0.03	0.16529	1.14
O15226	424	NKRF	C(ITC[C])HTGSSPR	2	NKRF_HUMAN NF-kappa-B-repressing factor OS=Homo sapiens OX=9606 GN=NKRF PE=1 SV=2	0.08	0.37835	1.325
P78527	1499	PRKDC	C(ITC[C])LPSLDLSCK	1	PRKDC_HUMAN DNA-dependent protein kinase catalytic subunit OS=Homo sapiens OX=9606 GN=PRKDC PE=1 SV=3	0.06	0.26608	1.16
Q13428	1012	TCOF1	C(ITC[C])LTPGIR	1	TCOF_HUMAN Treacle protein OS=Homo sapiens OX=9606 GN=TCOF1 PE=1 SV=3	0.06	0.22784	1.61
P07437	12	TUBB	C(ITC[C])GNQIGAK EIVHIQAGQC(ITC[C])GNQIGAK	5	TBB5_HUMAN Tubulin beta chain OS=Homo sapiens OX=9606 GN=TUBB PE=1 SV=2	0.108	0.08827	1.3
Q9UL40	68	ZNF346	C(ITC[C])LFTNTQCK	1	ZN346_HUMAN Zinc finger protein 346 OS=Homo sapiens OX=9606 GN=ZNF346 PE=1 SV=1	0.04	0.36289	1.09
Q8WYP5	521	AHCTF1	C(ITC[C])LVAGLLSPR	1	ELYS_HUMAN Protein ELYS OS=Homo sapiens OX=9606 GN=AHCTF1 PE=1 SV=3	0.22	0.29703	1.18
P04075	202	ALDOA	C(ITC[C])QYVTEK	3	ALDOA_HUMAN Fructose-bisphosphate aldolase A OS=Homo sapiens OX=9606 GN=ALDOA PE=1 SV=2	0.04	0.19011	1.45
Q4VCS5	741	AMOT	C(ITC[C])LDMEGR	3	AMOT_HUMAN Angiomotin OS=Homo sapiens OX=9606 GN=AMOT PE=1 SV=1	0.05667	0.04202	1.58
P46379	345	BAG6	C(ITC[C])NLACTPPR	1	BAG6_HUMAN Large proline-rich protein BAG6 OS=Homo sapiens OX=9606 GN=BAG6 PE=1 SV=2	0.06	0.13948	1.18
Q9H3K6	31	BOLA2	C(ITC[C])SCSFR	1	BOLA2_HUMAN BolA-like protein 2 OS=Homo sapiens OX=9606 GN=BOLA2 PE=1 SV=1	0.01	0.33051	1.63
Q99832	345	CCT7	C(ITC[C])QVFEETQIGGER	2	TCPH_HUMAN T-complex protein 1 subunit eta OS=Homo sapiens OX=9606 GN=CCT7 PE=1 SV=2	0.065	0.0595	1.115
Q9NYV4	1009	CDK12	C(ITC[C])TAEQTLQSDFLK	1	CDK12_HUMAN Cyclin-dependent kinase 12 OS=Homo sapiens OX=9606 GN=CDK12 PE=1 SV=2	0.03	0.002	1.28
Q5SW79	967	CEP170	C(ITC[C])STGSPSK	1	CE170_HUMAN Centrosomal protein of 170 kDa OS=Homo sapiens OX=9606 GN=CEP170 PE=1 SV=1	0.02	0.29698	1.57
P23528	147	CFL1	C(ITC[C])TLAEK	4	COF1_HUMAN Cofilin-1 OS=Homo sapiens OX=9606 GN=CFL1 PE=1 SV=3	0.075	0.22032	1.61
Q14008	1946	CKAP5	C(ITC[C])GLDNTK	2	CKAP5_HUMAN Cytoskeleton-associated protein 5 OS=Homo sapiens OX=9606 GN=CKAP5 PE=1 SV=3	0.03	0.3293	1.205
A5YKK6	624	CNOT1	C(ITC[C])PSILGGLAPEKDQPK C(ITC[C])PSILGGLAPEK	3	CNOT1_HUMAN CCR4-NOT transcription complex subunit 1 OS=Homo sapiens OX=9606 GN=CNOT1 PE=1 SV=2	0.04333	0.0064	1.26
Q9UBF2	44	COPG2	C(ITC[C])LHILTK	1	COPG2_HUMAN Coatomer subunit gamma-2 OS=Homo sapiens OX=9606 GN=COPG2 PE=1 SV=1	0.06	0.29406	0.89
O75534	186	CSDE1	C(ITC[C])QGVVCAMK	2	CSDE1_HUMAN Cold shock domain-containing protein E1 OS=Homo sapiens OX=9606 GN=CSDE1 PE=1 SV=2	0.17	0.13461	1.28
P17812	218	CTPS1	C(ITC[C])SNPLDTSVK	4	PYRG1_HUMAN CTP synthase 1 OS=Homo sapiens OX=9606 GN=CTPS1 PE=1 SV=2	0.0425	0.09211	0.925
Q8N8A6	338	DDX51	C(ITC[C])LADIVVATPGR	1	DDX51_HUMAN ATP-dependent RNA helicase DDX51 OS=Homo sapiens OX=9606 GN=DDX51 PE=1 SV=3	0.25	0.39432	0.91
O60231	37	DHX16	C(ITC[C])TSAEEFVQR	2	DHX16_HUMAN Pre-mRNA-splicing factor ATP-dependent RNA helicase DHX16 OS=Homo sapiens OX=9606 GN=DHX16 PE=1 SV=2	0.06	0.01388	1.44
P13639	369	EEF2	C(ITC[C])ELLYEGPPDDEAAMGIK	3	EF2_HUMAN Elongation factor 2 OS=Homo sapiens OX=9606 GN=EEF2 PE=1 SV=4	0.06	0.00625	1.78
O75616	150	ERAL1	C(ITC[C])QALGVITEK	2	ERAL1_HUMAN GTPase Era, mitochondrial OS=Homo sapiens OX=9606 GN=ERAL1 PE=1 SV=2	0.09	0.01209	1.365
Q15024	34	EXOSC7	C(ITC[C])VEVETDVVSNTSGSAR	6	EXOS7_HUMAN Exosome complex component RRP42 OS=Homo sapiens OX=9606 GN=EXOSC7 PE=1 SV=3	0.035	0.00399	1.75
Q9NVI1	594	FANCI	C(ITC[C])LSQQADVR	3	FANCI_HUMAN Fanconi anemia group I protein OS=Homo sapiens OX=9606 GN=FANCI PE=1 SV=4	0.07667	0.1508	2.82
Q92616	1235	GCN1	C(ITC[C])GLALALNK	6	GCN1_HUMAN eIF-2-alpha kinase activator GCN1 OS=Homo sapiens OX=9606 GN=GCN1 PE=1 SV=6	0.03	0.04596	1.12
Q9BVP2	158	GNL3	C(ITC[C])PQVEEAIVQSGQK	6	GNL3_HUMAN Guanine nucleotide-binding protein-like 3 OS=Homo sapiens OX=9606 GN=GNL3 PE=1 SV=2	0.05	0.04707	1.375
Q9NVN8	213	GNL3L	C(ITC[C])SVPVDQASESLLK	2	GNL3L_HUMAN Guanine nucleotide-binding protein-like 3-like protein OS=Homo sapiens OX=9606 GN=GNL3L PE=1 SV=1	0.05	0.01141	1.21
Q7Z4V5	631	HDGFL2	C(ITC[C])GSSEDLHDSVR	2	HDGR2_HUMAN Hepatoma-derived growth factor-related protein 2 OS=Homo sapiens OX=9606 GN=HDGFL2 PE=1 SV=1	0.19	0.0055	0.89
O75146	650	HIP1R	C(ITC[C])TSSPDYLVSR	1	HIP1R_HUMAN Huntingtin-interacting protein 1-related protein OS=Homo sapiens OX=9606 GN=HIP1R PE=1 SV=2	0.09	0.05173	1.59
Q14527	360	HLTF	C(ITC[C])SEQPSISDIK	3	HLTF_HUMAN Helicase-like transcription factor OS=Homo sapiens OX=9606 GN=HLTF PE=1 SV=2	0.05	0.20857	1.86
Q9UJC3	432	HOOK1	C(ITC[C])SQVQQDHLNQTDASATK	1	HOOK1_HUMAN Protein Hook homolog 1 OS=Homo sapiens OX=9606 GN=HOOK1 PE=1 SV=2	0.05	0.00016	1.91
Q3SXM5	265	HSDL1	C(ITC[C])SWLVPSPK	3	HSDL1_HUMAN Inactive hydroxysteroid dehydrogenase-like protein 1 OS=Homo sapiens OX=9606 GN=HSDL1 PE=1 SV=3	0.06	0.15132	0.99
P34932	34	HSPA4	C(ITC[C])TPACISFGPK	8	HSP74_HUMAN Heat shock 70 kDa protein 4 OS=Homo sapiens OX=9606 GN=HSPA4 PE=1 SV=4	0.0375	0.09297	1.86
Q92598	34	HSPH1	C(ITC[C])TPSVISFGSK	1	HS105_HUMAN Heat shock protein 105 kDa OS=Homo sapiens OX=9606 GN=HSPH1 PE=1 SV=1	0.01	0.01895	1.53
Q9H0C8	301	ILKAP	C(ITC[C])GVTSVPDIR	2	ILKAP_HUMAN Integrin-linked kinase-associated serine/threonine phosphatase 2C OS=Homo sapiens OX=9606 GN=ILKAP PE=1 SV=1	0.045	0.08884	1.015
Q92945	379	KHSRP	C(ITC[C])EHAAR	1	FUBP2_HUMAN Far upstream element-binding protein 2 OS=Homo sapiens OX=9606 GN=KHSRP PE=1 SV=4	0.13	0.32849	1.06
Q6PKG0	1054	LARP1	C(ITC[C])PSQSSSR	2	LARP1_HUMAN La-related protein 1 OS=Homo sapiens OX=9606 GN=LARP1 PE=1 SV=2	0.02	0.04236	1.495
P42704	930	LRPPRC	C(ITC[C])VANNQVETLEK	1	LPPRC_HUMAN Leucine-rich PPR motif-containing protein, mitochondrial OS=Homo sapiens OX=9606 GN=LRPPRC PE=1 SV=3	0.04	0.00558	1.51
Q5VWZ2	12	LYPLAL1	C(ITC[C])IVSPAGR	1	LYPL1_HUMAN Lysophospholipase-like protein 1 OS=Homo sapiens OX=9606 GN=LYPLAL1 PE=1 SV=3	0.02	0.0908	1.48
P49736	624	MCM2	C(ITC[C])TVIAAANPIGGR	2	MCM2_HUMAN DNA replication licensing factor MCM2 OS=Homo sapiens OX=9606 GN=MCM2 PE=1 SV=4	0.09	0.01843	0.99
P25205	446	MCM3	C(ITC[C])SVLAAANPVYGR	1	MCM3_HUMAN DNA replication licensing factor MCM3 OS=Homo sapiens OX=9606 GN=MCM3 PE=1 SV=3	0.15	0.16891	0.92
Q14676	26	MDC1	C(ITC[C])NVEPVGR	1	MDC1_HUMAN Mediator of DNA damage checkpoint protein 1 OS=Homo sapiens OX=9606 GN=MDC1 PE=1 SV=3	0.02	0.04422	1.71
Q5TGZ0	13	MICOS10	C(ITC[C])LADAVVK	5	MIC10_HUMAN MICOS complex subunit MIC10 OS=Homo sapiens OX=9606 GN=MICOS10 PE=1 SV=1	0.022	0.06683	1.22
P46013	3014	MKI67	C(ITC[C])MPAPEEIVEELPASK	1	KI67_HUMAN Proliferation marker protein Ki-67 OS=Homo sapiens OX=9606 GN=MKI67 PE=1 SV=2	0.11	0.00288	1.54
P46013	3229	MKI67	C(ITC[C])AENPK	1	KI67_HUMAN Proliferation marker protein Ki-67 OS=Homo sapiens OX=9606 GN=MKI67 PE=1 SV=2	0.04	0.31598	1.03
P29372	61	MPG	C(ITC[C])LGPPTTPGPYR	1	3MG_HUMAN DNA-3-methyladenine glycosylase OS=Homo sapiens OX=9606 GN=MPG PE=1 SV=3	0.07	0.40021	1.17
P46459	11	NSF	C(ITC[C])PTDELSLTNCAVVNEK	2	NSF_HUMAN Vesicle-fusing ATPase OS=Homo sapiens OX=9606 GN=NSF PE=1 SV=3	0.045	0.00062	1.69
Q9BW27	603	NUP85	C(ITC[C])LEDLTSR	1	NUP85_HUMAN Nuclear pore complex protein Nup85 OS=Homo sapiens OX=9606 GN=NUP85 PE=1 SV=1	0.11	0.15635	1.07
P47712	726	PLA2G4A	C(ITC[C])SVSLSNVEAR	2	PA24A_HUMAN Cytosolic phospholipase A2 OS=Homo sapiens OX=9606 GN=PLA2G4A PE=1 SV=2	0.03	0.08585	1.4
Q9BY77	338	POLDIP3	C(ITC[C])LDGQPMK	2	PDIP3_HUMAN Polymerase delta-interacting protein 3 OS=Homo sapiens OX=9606 GN=POLDIP3 PE=1 SV=2	0.035	0.13923	1.54
P78527	25	PRKDC	C(ITC[C])GAALAGHQLIR	2	PRKDC_HUMAN DNA-dependent protein kinase catalytic subunit OS=Homo sapiens OX=9606 GN=PRKDC PE=1 SV=3	0.03	0.00075	1.14
P78527	3187	PRKDC	C(ITC[C])FFLSK	2	PRKDC_HUMAN DNA-dependent protein kinase catalytic subunit OS=Homo sapiens OX=9606 GN=PRKDC PE=1 SV=3	0.02	0.3099	1.23
P17980	387	PSMC3	C(ITC[C])TDDFNGAQCK	1	PRS6A_HUMAN 26S proteasome regulatory subunit 6A OS=Homo sapiens OX=9606 GN=PSMC3 PE=1 SV=3	0.05	0.02763	1.31
O60216	392	RAD21	C(ITC[C])LTPLVPEDLR	2	RAD21_HUMAN Double-strand-break repair protein rad21 homolog OS=Homo sapiens OX=9606 GN=RAD21 PE=1 SV=2	0.06	0.17656	1.76
O75116	804	ROCK2	C(ITC[C])LTQNDLK	1	ROCK2_HUMAN Rho-associated protein kinase 2 OS=Homo sapiens OX=9606 GN=ROCK2 PE=1 SV=4	0.06	0.3082	1.99
P30050	17	RPL12	C(ITC[C])TGGEVGATSALAPK	8	RL12_HUMAN 60S ribosomal protein L12 OS=Homo sapiens OX=9606 GN=RPL12 PE=1 SV=1	0.04875	0.00015	1.325
Q02543	16	RPL18A	C(ITC[C])LPTPK	8	RL18A_HUMAN 60S ribosomal protein L18a OS=Homo sapiens OX=9606 GN=RPL18A PE=1 SV=2	0.01125	0.24604	1.715
P15880	188	RPS2	C(ITC[C])GSVLVR	4	RS2_HUMAN 40S ribosomal protein S2 OS=Homo sapiens OX=9606 GN=RPS2 PE=1 SV=2	0.02	0.23366	1.54
Q15050	52	RRS1	C(ITC[C])AGPTPEAELQALAR	1	RRS1_HUMAN Ribosome biogenesis regulatory protein homolog OS=Homo sapiens OX=9606 GN=RRS1 PE=1 SV=2	0.07	0.02957	1.15
Q9NSC2	216	SALL1	C(ITC[C])GGASGGK	2	SALL1_HUMAN Sal-like protein 1 OS=Homo sapiens OX=9606 GN=SALL1 PE=1 SV=2	0.17	0.30173	1.18
Q9UHR5	127	SAP30BP	C(ITC[C])SNHLQDK	2	S30BP_HUMAN SAP30-binding protein OS=Homo sapiens OX=9606 GN=SAP30BP PE=1 SV=1	0.055	0.20053	1.13
P60059	25	SEC61G	C(ITC[C])TKPDR	4	SC61G_HUMAN Protein transport protein Sec61 subunit gamma OS=Homo sapiens OX=9606 GN=SEC61G PE=1 SV=1	0.01	0.20798	1.445
O75643	428	SNRNP200	C(ITC[C])QLPDGSFR	2	U520_HUMAN U5 small nuclear ribonucleoprotein 200 kDa helicase OS=Homo sapiens OX=9606 GN=SNRNP200 PE=1 SV=2	0.03	0.18674	1.63
P62306	66	SNRPF	C(ITC[C])NNVLYIR	2	RUXF_HUMAN Small nuclear ribonucleoprotein F OS=Homo sapiens OX=9606 GN=SNRPF PE=1 SV=1	0.01	0.09366	1.33
P18583	92	SON	C(ITC[C])VSVQTDPTDEIPTKK C(ITC[C])VSVQTDPTDEIPTK	7	SON_HUMAN Protein SON OS=Homo sapiens OX=9606 GN=SON PE=1 SV=4	0.05857	0.07715	1.22
Q08170	115	SRSF4	C(ITC[C])SWQDLK	3	SRSF4_HUMAN Serine/arginine-rich splicing factor 4 OS=Homo sapiens OX=9606 GN=SRSF4 PE=1 SV=2	0.01667	0.2568	1.72
Q8WXH0	5586	SYNE2	C(ITC[C])SELQGIGLNEK	1	SYNE2_HUMAN Nesprin-2 OS=Homo sapiens OX=9606 GN=SYNE2 PE=1 SV=3	0.25	0.12331	1.62
Q9NXG2	31	THUMPD1	C(ITC[C])DAGGPR	1	THUM1_HUMAN THUMP domain-containing protein 1 OS=Homo sapiens OX=9606 GN=THUMPD1 PE=1 SV=2	0.03	0.37797	1.65
Q9C0C2	136	TNKS1BP1	C(ITC[C])AAPGGVR	2	TB182_HUMAN 182 kDa tankyrase-1-binding protein OS=Homo sapiens OX=9606 GN=TNKS1BP1 PE=1 SV=4	0.02	0.13606	1.575
Q69YN4	1008	VIRMA	C(ITC[C])TLTLLK	1	VIR_HUMAN Protein virilizer homolog OS=Homo sapiens OX=9606 GN=VIRMA PE=1 SV=2	0.13	0.40331	1.42
Q8IWA0	12	WDR75	C(ITC[C])GGSELNFR	1	WDR75_HUMAN WD repeat-containing protein 75 OS=Homo sapiens OX=9606 GN=WDR75 PE=1 SV=1	0.08	0.01093	1.1
Q8ND82	94	ZNF280C	C(ITC[C])RDPPSNPVAASPR	2	Z280C_HUMAN Zinc finger protein 280C OS=Homo sapiens OX=9606 GN=ZNF280C PE=1 SV=1	0.05	0.01506	1.16
P63261	272	ACTG1	C(ITC[C])GIHETTFNSIMK	6	ACTG_HUMAN Actin, cytoplasmic 2 OS=Homo sapiens OX=9606 GN=ACTG1 PE=1 SV=1	0.04333	0.06797	1.32
Q16204	27	CCDC6	C(ITC[C])SSTSGGGGGGGGGGGGGK	3	CCDC6_HUMAN Coiled-coil domain-containing protein 6 OS=Homo sapiens OX=9606 GN=CCDC6 PE=1 SV=2	0.09667	0.08802	1.23
P41091	105	EIF2S3	C(ITC[C])GSSTPDEFPTDIPGTK	1	IF2G_HUMAN Eukaryotic translation initiation factor 2 subunit 3 OS=Homo sapiens OX=9606 GN=EIF2S3 PE=1 SV=3	0.07	0.13709	1.36
Q9NVI1	1158	FANCI	C(ITC[C])VDTILK	1	FANCI_HUMAN Fanconi anemia group I protein OS=Homo sapiens OX=9606 GN=FANCI PE=1 SV=4	0.06	0.30396	2.56
P04406	152	GAPDH	C(ITC[C])TTNCLAPLAK	4	G3P_HUMAN Glyceraldehyde-3-phosphate dehydrogenase OS=Homo sapiens OX=9606 GN=GAPDH PE=1 SV=3	0.025	0.00583	1.16
Q9BQG0	968	MYBBP1A	C(ITC[C])LDLNLVTR	3	MBB1A_HUMAN Myb-binding protein 1A OS=Homo sapiens OX=9606 GN=MYBBP1A PE=1 SV=2	0.07667	0.1224	0.9
Q9BQG0	614	MYBBP1A	C(ITC[C])DLLGDIQTCIR	1	MBB1A_HUMAN Myb-binding protein 1A OS=Homo sapiens OX=9606 GN=MYBBP1A PE=1 SV=2	0.13	0.01949	1.29
O75694	651	NUP155	C(ITC[C])VTGPEIVYSGK	1	NU155_HUMAN Nuclear pore complex protein Nup155 OS=Homo sapiens OX=9606 GN=NUP155 PE=1 SV=1	0.11	0.19169	0.98
P54646	174	PRKAA2	C(ITC[C])GSPNYAAPEVISGR	1	AAPK2_HUMAN 5'-AMP-activated protein kinase catalytic subunit alpha-2 OS=Homo sapiens OX=9606 GN=PRKAA2 PE=1 SV=2	0.19	0.05469	1.02
P78527	1904	PRKDC	C(ITC[C])ITEGNELTK	3	PRKDC_HUMAN DNA-dependent protein kinase catalytic subunit OS=Homo sapiens OX=9606 GN=PRKDC PE=1 SV=3	0.06667	0.10311	1.49
Q8IXT5	204	RBM12B	C(ITC[C])VDASGGLK	3	RB12B_HUMAN RNA-binding protein 12B OS=Homo sapiens OX=9606 GN=RBM12B PE=1 SV=2	0.02333	0.11915	1.42
O75643	1278	SNRNP200	C(ITC[C])ETQLPVSFR	2	U520_HUMAN U5 small nuclear ribonucleoprotein 200 kDa helicase OS=Homo sapiens OX=9606 GN=SNRNP200 PE=1 SV=2	0.12	0.20513	0.92
P84103	6	SRSF3	C(ITC[C])PLDCK	2	SRSF3_HUMAN Serine/arginine-rich splicing factor 3 OS=Homo sapiens OX=9606 GN=SRSF3 PE=1 SV=1	0.025	0.3559	1.815
P42166	561	TMPO	C(ITC[C])NQQLDLALCR	1	LAP2A_HUMAN Lamina-associated polypeptide 2, isoform alpha OS=Homo sapiens OX=9606 GN=TMPO PE=1 SV=2	0.02	0.05467	0.96
P45880	47	VDAC2	SC(ITC[C])SGVEFSTSGSSNTDTGK C(ITC[C])SGVEFSTSGSSNTDTGK	29	VDAC2_HUMAN Voltage-dependent anion-selective channel protein 2 OS=Homo sapiens OX=9606 GN=VDAC2 PE=1 SV=2	0.03759	0.00121	1.16
Q9Y277	36	VDAC3	C(ITC[C])SGVEFSTSGHAYTDTGK	11	VDAC3_HUMAN Voltage-dependent anion-selective channel protein 3 OS=Homo sapiens OX=9606 GN=VDAC3 PE=1 SV=1	0.03	0.00197	1.23
P51649	340	ALDH5A1	C(ITC[C])VCSNQFLVQR	2	SSDH_HUMAN Succinate-semialdehyde dehydrogenase, mitochondrial OS=Homo sapiens OX=9606 GN=ALDH5A1 PE=1 SV=2	0.05	0.03236	1.415
O95861	42	BPNT1	C(ITC[C])ATDLQTK	2	BPNT1_HUMAN 3'(2'),5'-bisphosphate nucleotidase 1 OS=Homo sapiens OX=9606 GN=BPNT1 PE=1 SV=1	0.04	0.19129	1.86
Q9H0S4	273	DDX47	C(ITC[C])NNTQR	1	DDX47_HUMAN Probable ATP-dependent RNA helicase DDX47 OS=Homo sapiens OX=9606 GN=DDX47 PE=1 SV=1	0.02	0.35509	1.35
Q9BTX1	468	NDC1	C(ITC[C])YGSPQSPQLIR	1	NDC1_HUMAN Nucleoporin NDC1 OS=Homo sapiens OX=9606 GN=NDC1 PE=1 SV=2	0.06	0.33269	1.06
Q92973	153	TNPO1	C(ITC[C])EGAFGALQK	1	TNPO1_HUMAN Transportin-1 OS=Homo sapiens OX=9606 GN=TNPO1 PE=1 SV=2	0.04	0.04134	1.16
Q93009	315	USP7	C(ITC[C])VEGTIPK	2	UBP7_HUMAN Ubiquitin carboxyl-terminal hydrolase 7 OS=Homo sapiens OX=9606 GN=USP7 PE=1 SV=2	0.01	0.36063	1.3
P08670	328	VIM	C(ITC[C])EVDALK	2	VIME_HUMAN Vimentin OS=Homo sapiens OX=9606 GN=VIM PE=1 SV=4	0.03	0.23107	1.26
O00410	110	IPO5	C(ITC[C])DIAAELAR	7	IPO5_HUMAN Importin-5 OS=Homo sapiens OX=9606 GN=IPO5 PE=1 SV=4	0.04286	0.18402	1.65
Q9BSD7	110	NTPCR	C(ITC[C])VIDEIGK	2	NTPCR_HUMAN Cancer-related nucleoside-triphosphatase OS=Homo sapiens OX=9606 GN=NTPCR PE=1 SV=1	0.05	0.20587	1.79
P62826	112	RAN	C(ITC[C])ENIPIVLCGNK	4	RAN_HUMAN GTP-binding nuclear protein Ran OS=Homo sapiens OX=9606 GN=RAN PE=1 SV=3	0.025	0.05422	1.72
P08708	35	RPS17	C(ITC[C])EEIAIIPSK	2	RS17_HUMAN 40S ribosomal protein S17 OS=Homo sapiens OX=9606 GN=RPS17 PE=1 SV=2	0.03	0.37034	1.52
P68363	376	TUBA1B	C(ITC[C])MLSNTTAIAEAWAR	1	TBA1B_HUMAN Tubulin alpha-1B chain OS=Homo sapiens OX=9606 GN=TUBA1B PE=1 SV=1	0.11	0.00095	1.82
Q9Y277	65	VDAC3	C(ITC[C])NYGLTFTQK	6	VDAC3_HUMAN Voltage-dependent anion-selective channel protein 3 OS=Homo sapiens OX=9606 GN=VDAC3 PE=1 SV=1	0.02	0.17839	1.45
Q92616	939	GCN1	C(ITC[C])QEELSVAVK	1	GCN1_HUMAN eIF-2-alpha kinase activator GCN1 OS=Homo sapiens OX=9606 GN=GCN1 PE=1 SV=6	0.07	0.04043	1.67
Q96J01	25	THOC3	C(ITC[C])SVSSGPSR	3	THOC3_HUMAN THO complex subunit 3 OS=Homo sapiens OX=9606 GN=THOC3 PE=1 SV=1	0.03	0.18359	1.3
P45880	76	VDAC2	C(ITC[C])EYGLTFTEK	3	VDAC2_HUMAN Voltage-dependent anion-selective channel protein 2 OS=Homo sapiens OX=9606 GN=VDAC2 PE=1 SV=2	0.02	0.09517	1.35
P31943	267	HNRNPH1	C(ITC[C])FSGMSDHR	3	HNRH1_HUMAN Heterogeneous nuclear ribonucleoprotein H OS=Homo sapiens OX=9606 GN=HNRNPH1 PE=1 SV=4	0.04333	0.19847	1.91
Q9BQG0	890	MYBBP1A	C(ITC[C])HDLGER	1	MBB1A_HUMAN Myb-binding protein 1A OS=Homo sapiens OX=9606 GN=MYBBP1A PE=1 SV=2	0.05	0.27599	1.1
Q9NR33	84	POLE4	C(ITC[C])CAQQGK	1	DPOE4_HUMAN DNA polymerase epsilon subunit 4 OS=Homo sapiens OX=9606 GN=POLE4 PE=1 SV=2	0.11	0.40001	1.33
P62910	96	RPL32	C(ITC[C])AEIAHNVSSK	1	RL32_HUMAN 60S ribosomal protein L32 OS=Homo sapiens OX=9606 GN=RPL32 PE=1 SV=2	0.12	0.0039	1.19
P62979	149	RPS27A	C(ITC[C])FNKPEDK	3	RS27A_HUMAN Ubiquitin-40S ribosomal protein S27a OS=Homo sapiens OX=9606 GN=RPS27A PE=1 SV=2	0.01333	0.17349	1.49
