# Supplementary material for: Proteolysis-assisted cyclization facilitates site-centric target deconvolution of isothiocyanates
Source: Research Square preprint supplement (doi:10.21203/rs.3.rs-5055115/v1), 2025-10-08
Supplement: Supplementary file 2 [file 42d809091acb45b5f95fea1e.xlsx]

## Sheet: Legend
Supplementary Data 4. ProK-based PAC for mapping in situ ITCyne-adducted sites in the HEK293T proteome. HEK293T cells treated with 500 μM ITCyne were harvested, lysed and digested with ProK. The resulting probe-labeled peptides were conjugated with Az-UV-biotin via CuAAC. The biotinylated peptides were captured with streptavidin and photoreleased for LC-MS/MS-based proteomics.

## Sheet: Data S4
Uniprot Accession #	Site #	Genename	Genename_Site#	Description	AA in P(-1)	Modified Sequences			Spectrum Count			Median identification score			# of duplicate
						BP1	BP2	BP3	BP1	BP2	BP3	BP1	BP2	BP3
P13639	369	EEF2	EEF2_C369	EF2_HUMAN Elongation factor 2 OS=Homo sapiens OX=9606 GN=EEF2 PE=1 SV=4	R	C#ELLYEGPPDDEAAMGIK	C#ELLYEGPPDDEAAMGIK	C#ELLYEGPPDDEAAMGIK	4	2	8	0.00103575	0.000100485	1.4e-05	3
P45880	47	VDAC2	VDAC2_C47	VDAC2_HUMAN Voltage-dependent anion-selective channel protein 2 OS=Homo sapiens OX=9606 GN=VDAC2 PE=1 SV=2	S	C#SGVEFSTSGSSNTDTGK C#SGVEFSTS C#SGVEFS C#SGVEF	C#SGVEFSTSGSSNTDTGK	C#SGVEFSTSGSSNTDTGK	5	3	4	0.149833	0.00225383	0.000170856	3
P21333	2543	FLNA	FLNA_C2543	FLNA_HUMAN Filamin-A OS=Homo sapiens OX=9606 GN=FLNA PE=1 SV=4	T	C#APQHGAPGPGPADASK C#APQHGAPGPGPADAS	C#APQHGAPGPGPADAS C#APQHGAPGPGPADASK C#APQHGAPGPGPA	C#APQHGAPGPGPADASK C#APQHGAPGPGPA C#APQHGAPGPGPADAS	4	6	7	0.00430221	0.0136096	0.0101093	3
P22314	1040	UBA1	UBA1_C1040	UBA1_HUMAN Ubiquitin-like modifier-activating enzyme 1 OS=Homo sapiens OX=9606 GN=UBA1 PE=1 SV=3	C	C#NDESGEDVEVPYVR	C#NDESGEDVEVPYVR	C#NDESGEDVEVPYVR	1	1	1	0.000490512	0.00102372	0.00960082	3
P13591	829	NCAM1	NCAM1_C829	NCAM1_HUMAN Neural cell adhesion molecule 1 OS=Homo sapiens OX=9606 GN=NCAM1 PE=1 SV=3	E	C#QETETKPAPAEVK	C#QETETKPAPAEVK	C#QETETKPAPAEVK	1	2	2	0.000545316	0.0331088	0.000709	3
Q9Y678	325	COPG1	COPG1_C325	COPG1_HUMAN Coatomer subunit gamma-1 OS=Homo sapiens OX=9606 GN=COPG1 PE=1 SV=1	A	C#NLDLENLVTDSNR	C#NLDLENLVTDSNR C#NLDLENL	C#NLDLENLVTDSNR	2	2	1	0.0171141	0.146912	8.81e-05	3
O00410	180	IPO5	IPO5_C180	IPO5_HUMAN Importin-5 OS=Homo sapiens OX=9606 GN=IPO5 PE=1 SV=4	Q	C#MQDQEHPSIR	C#MQDQEHPSIR	C#MQDQEHPSIR C#MQDQE	4	4	4	0.00592773	0.00259254	0.0182	3
P00558	108	PGK1	PGK1_C108	PGK1_HUMAN Phosphoglycerate kinase 1 OS=Homo sapiens OX=9606 GN=PGK1 PE=1 SV=3	A	C#ANPAAGSVILLENLR C#ANPAAGSVILL	C#ANPAAGSVILL C#ANPAAGSVILLENLR C#ANPAAGSVIL	C#ANPAAGSVILLENLR	3	3	2	0.00239589	0.0966241	0.00839483	3
P49327	1227	FASN	FASN_C1227	FAS_HUMAN Fatty acid synthase OS=Homo sapiens OX=9606 GN=FASN PE=1 SV=3	A	C#LDTAVENMPSLK	C#LDTAVENMPSLK	C#LDTAVENMPSLK	3	2	3	0.00487363	0.00097654	0.000245095	3
P19623	123	SRM	SRM_C123	SPEE_HUMAN Spermidine synthase OS=Homo sapiens OX=9606 GN=SRM PE=1 SV=1	Q	C#EIDEDVIQVSK	C#EIDEDVIQVSK	C#EIDEDVIQVSK	1	1	1	0.0029302	0.00550264	0.000432502	3
P50914	54	RPL14	RPL14_C54	RL14_HUMAN 60S ribosomal protein L14 OS=Homo sapiens OX=9606 GN=RPL14 PE=1 SV=4	K	C#MQLTDFILK	C#MQLTDFILK	C#MQLTDFILK	1	1	1	0.00316207	0.00681257	0.000725727	3
P21333	796	FLNA	FLNA_C796	FLNA_HUMAN Filamin-A OS=Homo sapiens OX=9606 GN=FLNA PE=1 SV=4	D	C#AEAGQGDVSIGIK	C#AEAGQGDVSIGIK	C#AEAGQGDVSIGIK	1	1	2	0.00319076	0.00293038	0.0256031	3
O43175	200	PHGDH	PHGDH_C200	SERA_HUMAN D-3-phosphoglycerate dehydrogenase OS=Homo sapiens OX=9606 GN=PHGDH PE=1 SV=4	L	C#DFITVHTPLLPSTT C#DFITVH	C#DFITVHTPLLPSTT C#DFITVH	C#DFITVHTPLLPSTT C#DFITVH	3	2	2	0.0440909	0.10145	0.0971416	3
Q13263	669	TRIM28	TRIM28_C669	TIF1B_HUMAN Transcription intermediary factor 1-beta OS=Homo sapiens OX=9606 GN=TRIM28 PE=1 SV=5	L	C#HVLPDLKEEDGSL C#HVLPDLK	C#HVLPDLK	C#HVLPDLKEEDGSLSLDGADST C#HVLPDLK C#HVLPDLKEEDGSL C#HVLPDLKEEDGSLS	2	4	5	0.0240559	0.0512543	0.0338991	3
Q9NVP1	183	DDX18	DDX18_C183	DDX18_HUMAN ATP-dependent RNA helicase DDX18 OS=Homo sapiens OX=9606 GN=DDX18 PE=1 SV=2	L	C#NLVNENTLK	C#NLVNENTLK C#NLVNEN	C#NLVNENTLK	1	2	1	0.00459016	0.158592	0.00169433	3
Q96T88	512	UHRF1	UHRF1_C512	UHRF1_HUMAN E3 ubiquitin-protein ligase UHRF1 OS=Homo sapiens OX=9606 GN=UHRF1 PE=1 SV=1	N	C#FAPINDQEGAEAK	C#FAPINDQEGAEAK	C#FAPINDQEGAEAK	1	1	1	0.00460966	0.182363	0.000366627	3
P52597	34	HNRNPF	HNRNPF_C34	HNRPF_HUMAN Heterogeneous nuclear ribonucleoprotein F OS=Homo sapiens OX=9606 GN=HNRNPF PE=1 SV=3	D	C#TIHDGAAGVH	C#TIHDGAAGVH	C#TIHDGAAGVH C#TIHDGAAGVHF C#TIHDGAAGV	1	1	5	0.00553827	0.00287063	0.0214036	3
P05198	218	EIF2S1	EIF2S1_C218	IF2A_HUMAN Eukaryotic translation initiation factor 2 subunit 1 OS=Homo sapiens OX=9606 GN=EIF2S1 PE=1 SV=3	N	C#STENMPIK	C#STENMPIK	C#STENMPIK	2	2	2	0.0205831	0.0259363	0.0153307	3
Q9H0D6	159	XRN2	XRN2_C159	XRN2_HUMAN 5'-3' exoribonuclease 2 OS=Homo sapiens OX=9606 GN=XRN2 PE=1 SV=1	N	C#ITPGTEFMDNLAK	C#ITPGTEFMDNLAK	C#ITPGTEFMDNLAK	3	2	3	0.0813346	0.023696	0.00708426	3
P61619	13	SEC61A1	SEC61A1_C13	S61A1_HUMAN Protein transport protein Sec61 subunit alpha isoform 1 OS=Homo sapiens OX=9606 GN=SEC61A1 PE=1 SV=2	F	C#VILPEIQKPER	C#VILPEIQKPER	C#VILPEIQKPER	4	5	1	0.0185129	0.0411118	0.00170732	3
P30050	17	RPL12	RPL12_C17	RL12_HUMAN 60S ribosomal protein L12 OS=Homo sapiens OX=9606 GN=RPL12 PE=1 SV=1	R	C#TGGEVGATSALAPK C#TGGEVGATS	C#TGGEVGATSALAPK C#TGGEVGATS C#TGGEVGAT	C#TGGEVGATSALAPK C#TGGEVGATS C#TGGEVGAT C#TGGEVGATSAL C#TGGEVGATSA	3	4	12	0.0706065	0.0548242	0.021387	3
Q15056	85	EIF4H	EIF4H_C85	IF4H_HUMAN Eukaryotic translation initiation factor 4H OS=Homo sapiens OX=9606 GN=EIF4H PE=1 SV=5	F	C#YVEFDEVDSLK	C#YVEFDEVDSLK	C#YVEFDEVDSLK	1	1	1	0.00645503	0.00308424	0.000927491	3
O75367	276	H2AFY	H2AFY_C276	H2AY_HUMAN Core histone macro-H2A.1 OS=Homo sapiens OX=9606 GN=H2AFY PE=1 SV=4	H	C#NSPVWGADK	C#NSPVWGADK	C#NSPVWGADK	2	1	1	0.14353	0.0377082	0.00807247	3
P12004	81	PCNA	PCNA_C81	PCNA_HUMAN Proliferating cell nuclear antigen OS=Homo sapiens OX=9606 GN=PCNA PE=1 SV=1	K	C#AGNEDIITLR C#AGNEDIITL	C#AGNEDIITLR C#AGNEDIITL	C#AGNEDIITLR	2	2	2	0.0614288	0.0503778	0.0179178	3
O00410	229	IPO5	IPO5_C229	IPO5_HUMAN Importin-5 OS=Homo sapiens OX=9606 GN=IPO5 PE=1 SV=4	S	C#YQNDDSVLK	C#YQNDDSVLK	C#YQNDDSVLK	1	2	1	0.00783911	0.176543	0.00200871	3
P13639	290	EEF2	EEF2_C290	EF2_HUMAN Elongation factor 2 OS=Homo sapiens OX=9606 GN=EEF2 PE=1 SV=4	F	C#QLILDPIFK	C#QLILDPIFK	C#QLILDPIFK	1	1	1	0.00784035	0.0147451	0.00829412	3
P16615	420	ATP2A2	ATP2A2_C420	AT2A2_HUMAN Sarcoplasmic/endoplasmic reticulum calcium ATPase 2 OS=Homo sapiens OX=9606 GN=ATP2A2 PE=1 SV=1	L	C#NDSALDYNEAK	C#NDSALDYNEAK	C#NDSALDYNEAK	1	1	1	0.00836607	0.0114492	0.00124678	3
P41252	87	IARS	IARS_C87	SYIC_HUMAN Isoleucine--tRNA ligase, cytoplasmic OS=Homo sapiens OX=9606 GN=IARS PE=1 SV=2	D	C#HGLPVEYEIDK	C#HGLPVEYEIDK	C#HGLPVEYEIDK	3	3	2	0.0295924	0.00950403	0.00198592	3
P13639	651	EEF2	EEF2_C651	EF2_HUMAN Elongation factor 2 OS=Homo sapiens OX=9606 GN=EEF2 PE=1 SV=4	W	C#FGPDGTGPNILTDITK	C#FGPDGTGPNILTDITK	C#FGPDGTGPNILTDITK	2	1	1	0.0232062	0.0139219	0.00143779	3
P11586	785	MTHFD1	MTHFD1_C785	C1TC_HUMAN C-1-tetrahydrofolate synthase, cytoplasmic OS=Homo sapiens OX=9606 GN=MTHFD1 PE=1 SV=3	K	C#THWAEGGK	C#THWAEGGK	C#THWAEGGK	2	2	1	0.0941746	0.0169586	0.0110589	3
P08134	107	RHOC	RHOC_C107	RHOC_HUMAN Rho-related GTP-binding protein RhoC OS=Homo sapiens OX=9606 GN=RHOC PE=1 SV=1	F	C#PNVPIILVGNK C#PNVPIILVGN	C#PNVPIILVGNK	C#PNVPIILVGNK	2	1	1	0.102622	0.0448695	0.0142698	3
Q00839	648	HNRNPU	HNRNPU_C648	HNRPU_HUMAN Heterogeneous nuclear ribonucleoprotein U OS=Homo sapiens OX=9606 GN=HNRNPU PE=1 SV=6	E	C#FDEITYVELQK	C#FDEITYVELQK	C#FDEITYVELQK C#FDEITYVELQKEEAQK	1	2	3	0.00954904	0.0262356	0.00804969	3
P12277	254	CKB	CKB_C254	KCRB_HUMAN Creatine kinase B-type OS=Homo sapiens OX=9606 GN=CKB PE=1 SV=1	F	C#TGLTQIETLFK	C#TGLTQIETLFK C#TGLTQIE	C#TGLTQIETLFK	1	2	1	0.00987436	0.0586027	0.0113764	3
Q9BZL1	18	UBL5	UBL5_C18	UBL5_HUMAN Ubiquitin-like protein 5 OS=Homo sapiens OX=9606 GN=UBL5 PE=1 SV=1	K	C#NTDDTIGDLK C#NTDDTIGDLKK	C#NTDDTIGDLKK C#NTDDTIGDLK	C#NTDDTIGDLKK	3	3	2	0.0229774	0.0349177	0.00551547	3
P53384	256	NUBP1	NUBP1_C256	NUBP1_HUMAN Cytosolic Fe-S cluster assembly factor NUBP1 OS=Homo sapiens OX=9606 GN=NUBP1 PE=1 SV=2	M	C#QDLEVPLLGR	C#QDLEVPLLGR	C#QDLEVPLLGR	2	1	2	0.106737	0.00421702	0.0187929	3
Q8WVT3	118	TRAPPC12	TRAPPC12_C118	TPC12_HUMAN Trafficking protein particle complex subunit 12 OS=Homo sapiens OX=9606 GN=TRAPPC12 PE=1 SV=3	D	C#APEDAAPSSGGAPR	C#APEDAAPSSGGAPR	C#APEDAAPSSGGAPR	1	1	2	0.0117274	0.0638356	0.242089	3
O00232	109	PSMD12	PSMD12_C109	PSD12_HUMAN 26S proteasome non-ATPase regulatory subunit 12 OS=Homo sapiens OX=9606 GN=PSMD12 PE=1 SV=3	C	C#TYVEEITDLPIK	C#TYVEEITDLPIK	C#TYVEEITDLPIK	1	1	2	0.0120942	0.010836	0.0142585	3
Q9Y2X3	106	NOP58	NOP58_C106	NOP58_HUMAN Nucleolar protein 58 OS=Homo sapiens OX=9606 GN=NOP58 PE=1 SV=1	S	C#IHSPVVNELMR	C#IHSPVVNELMR C#IHSPVVNEL	C#IHSPVVNELMR	2	4	1	0.0480064	0.0452037	0.00269244	3
P13639	536	EEF2	EEF2_C536	EF2_HUMAN Elongation factor 2 OS=Homo sapiens OX=9606 GN=EEF2 PE=1 SV=4	Q	C#IIEESGEHIIAGA C#IIEESGEHIIA C#IIEESGEHIIAG	C#IIEESGEHIIAGA C#IIEESGEHIIAG C#IIEESGEHIIA	C#IIEESGEHIIAGA C#IIEESGEHIIA C#IIEESGEHIIAG C#IIEESGEHIIAGAG	6	4	6	0.0331796	0.021482	0.00326645	3
Q15181	274	PPA1	PPA1_C274	IPYR_HUMAN Inorganic pyrophosphatase OS=Homo sapiens OX=9606 GN=PPA1 PE=1 SV=2	A	C#TVPTDVDK	C#TVPTDVDK	C#TVPTDVDK	2	1	2	0.0247598	0.0114865	0.01299	3
Q8N0X7	562	SPART	SPART_C562	SPART_HUMAN Spartin OS=Homo sapiens OX=9606 GN=SPART PE=1 SV=1	K	C#IVNNVSAETVQTVR	C#IVNNVSAETVQTVR	C#IVNNVSAETVQTVR	3	1	2	0.0309918	0.0246255	0.00147502	3
P78527	25	PRKDC	PRKDC_C25	PRKDC_HUMAN DNA-dependent protein kinase catalytic subunit OS=Homo sapiens OX=9606 GN=PRKDC PE=1 SV=3	R	C#GAALAGHQLIR	C#GAALAGH	C#GAALAGHQLIR C#GAALAGH C#GAALAGHQ	1	1	5	0.0144549	0.0585048	0.0227548	3
Q92973	103	TNPO1	TNPO1_C103	TNPO1_HUMAN Transportin-1 OS=Homo sapiens OX=9606 GN=TNPO1 PE=1 SV=2	E	C#LNNIGDSSPLIR	C#LNNIGDSSPLIR	C#LNNIGDSSPLIR	1	2	2	0.0146806	0.0147101	0.0163543	3
Q5VTL8	29	PRPF38B	PRPF38B_C29	PR38B_HUMAN Pre-mRNA-splicing factor 38B OS=Homo sapiens OX=9606 GN=PRPF38B PE=1 SV=1	Q	C#GGGGATKPAVSGK C#GGGGATK	C#GGGGATKPAVSGK	C#GGGGATKPAVSGK C#GGGGATKPAVS	3	2	2	0.060037	0.0885301	0.113991	3
Q00534	15	CDK6	CDK6_C15	CDK6_HUMAN Cyclin-dependent kinase 6 OS=Homo sapiens OX=9606 GN=CDK6 PE=1 SV=1	E	C#VAEIGEGAYGK	C#VAEIGEGAYGK	C#VAEIGEGAYGK	1	1	1	0.0155781	0.00306524	0.143038	3
P25398	69	RPS12	RPS12_C69	RS12_HUMAN 40S ribosomal protein S12 OS=Homo sapiens OX=9606 GN=RPS12 PE=1 SV=3	L	C#AEHQINLIK	C#AEHQINLIK	C#AEHQINLIK	1	1	1	0.0155916	0.0164006	0.0326966	3
P60660	2	MYL6	MYL6_C2	MYL6_HUMAN Myosin light polypeptide 6 OS=Homo sapiens OX=9606 GN=MYL6 PE=1 SV=2	M	C#DFTEDQTAEFK	C#DFTEDQTAEFK	C#DFTEDQTAEFK	2	1	1	0.0179054	0.000839478	0.000451872	3
P13489	362	RNH1	RNH1_C362	RINI_HUMAN Ribonuclease inhibitor OS=Homo sapiens OX=9606 GN=RNH1 PE=1 SV=2	L	C#QGLGQPGSVLR	C#QGLGQPGSVLR	C#QGLGQPGSVLR	1	1	1	0.0160771	0.00852272	0.00349709	3
P07814	1487	EPRS	EPRS_C1487	SYEP_HUMAN Bifunctional glutamate/proline--tRNA ligase OS=Homo sapiens OX=9606 GN=EPRS PE=1 SV=5	L	C#ELQPGAK	C#ELQPGAK	C#ELQPGAK	2	2	1	0.0469251	0.0153061	0.00803604	3
P05198	199	EIF2S1	EIF2S1_C199	IF2A_HUMAN Eukaryotic translation initiation factor 2 subunit 1 OS=Homo sapiens OX=9606 GN=EIF2S1 PE=1 SV=3	A	C#YGYEGIDAVK	C#YGYEGIDAVK	C#YGYEGIDAVK	1	2	1	0.0161948	0.0227091	0.0026787	3
Q8WXA9	494	SREK1	SREK1_C494	SREK1_HUMAN Splicing regulatory glutamine/lysine-rich protein 1 OS=Homo sapiens OX=9606 GN=SREK1 PE=1 SV=1	N	C#QLNEENLSTK	C#QLNEENLSTK	C#QLNEENLSTK	1	1	1	0.0164552	0.00664317	0.000642835	3
Q6UB35	291	MTHFD1L	MTHFD1L_C291	C1TM_HUMAN Monofunctional C1-tetrahydrofolate synthase, mitochondrial OS=Homo sapiens OX=9606 GN=MTHFD1L PE=1 SV=1	N	C#SHDFLSGK	C#SHDFLSGK	C#SHDFLSGK	2	1	2	0.0815555	0.0399621	0.0474557	3
Q14166	528	TTLL12	TTLL12_C528	TTL12_HUMAN Tubulin--tyrosine ligase-like protein 12 OS=Homo sapiens OX=9606 GN=TTLL12 PE=1 SV=2	H	C#EEFIPEFEK	C#EEFIPEFEK	C#EEFIPEFEK	1	1	1	0.0174512	0.0409779	0.0125281	3
P06748	104	NPM1	NPM1_C104	NPM_HUMAN Nucleophosmin OS=Homo sapiens OX=9606 GN=NPM1 PE=1 SV=2	K	C#GSGPVHISGQ C#GSGPVHISGQHL C#GSGPVHIS	C#GSGPVHISGQHL C#GSGPVHISGQHLVA C#GSGPVHIS C#GSGPVH C#GSGPVHISG	C#GSGPVHISGQHL C#GSGPVHISGQ C#GSGPVHISGQH C#GSGPVHIS C#GSGPVHISGQHLVAVEED C#GSGPVHISG C#GSGPVHISGQHLVA C#GSGPVHI	7	7	14	0.0817653	0.0449871	0.0145889	3
P17987	76	TCP1	TCP1_C76	TCPA_HUMAN T-complex protein 1 subunit alpha OS=Homo sapiens OX=9606 GN=TCP1 PE=1 SV=1	L	C#ELADLQDK	C#ELADLQDK	C#ELADLQDK	1	1	1	0.0181972	0.0136795	0.0445717	3
Q13363	38	CTBP1	CTBP1_C38	CTBP1_HUMAN C-terminal-binding protein 1 OS=Homo sapiens OX=9606 GN=CTBP1 PE=1 SV=2	D	C#TVEMPILK	C#TVEMPILK	C#TVEMPILK	1	1	1	0.0189316	0.0482535	0.0144148	3
Q9Y4C2	335	TCAF1	TCAF1_C335	TCAF1_HUMAN TRPM8 channel-associated factor 1 OS=Homo sapiens OX=9606 GN=TCAF1 PE=1 SV=3	Y	C#FEPVSEVGVK	C#FEPVSEVGVK	C#FEPVSEVGVK	1	1	1	0.019358	0.00674638	0.00202342	3
Q9Y490	1353	TLN1	TLN1_C1353	TLN1_HUMAN Talin-1 OS=Homo sapiens OX=9606 GN=TLN1 PE=1 SV=3	M	C#TQQAPGQK	C#TQQAPGQK	C#TQQAPGQK	1	1	2	0.0200449	0.0150278	0.066554	3
P82933	233	MRPS9	MRPS9_C233	RT09_HUMAN 28S ribosomal protein S9, mitochondrial OS=Homo sapiens OX=9606 GN=MRPS9 PE=1 SV=2	Q	C#GAAEEEFVQR	C#GAAEEEFVQR	C#GAAEEEFVQR	1	1	1	0.0201542	0.0136129	0.0209181	3
Q96QK1	640	VPS35	VPS35_C640	VPS35_HUMAN Vacuolar protein sorting-associated protein 35 OS=Homo sapiens OX=9606 GN=VPS35 PE=1 SV=2	K	C#FSEENHEPLR	C#FSEENHEPLR	C#FSEENHEPLR	1	3	2	0.0206386	0.035048	0.00190645	3
P49189	355	ALDH9A1	ALDH9A1_C355	AL9A1_HUMAN 4-trimethylaminobutyraldehyde dehydrogenase OS=Homo sapiens OX=9606 GN=ALDH9A1 PE=1 SV=3	L	C#GGDIYVPEDPK	C#GGDIYVPEDPK	C#GGDIYVPEDPK	2	1	1	0.0901201	0.0132796	0.0268613	3
Q8NI27	1111	THOC2	THOC2_C1111	THOC2_HUMAN THO complex subunit 2 OS=Homo sapiens OX=9606 GN=THOC2 PE=1 SV=2	H	C#LETGEYTHIR	C#LETGEYTHIR	C#LETGEYTHIR	2	2	2	0.0939993	0.0225944	0.044623	3
Q15269	24	PWP2	PWP2_C24	PWP2_HUMAN Periodic tryptophan protein 2 homolog OS=Homo sapiens OX=9606 GN=PWP2 PE=2 SV=2	T	C#DGNSVISPVGNR	C#DGNSVISPVGNR	C#DGNSVISPVGNR	2	2	2	0.060819	0.00406719	0.0545086	3
Q9UHD8	248	SEPTIN9	SEPTIN9_C248	SEPT9_HUMAN Septin-9 OS=Homo sapiens OX=9606 GN=SEPTIN9 PE=1 SV=2	S	C#VGDMADTPR	C#VGDMADTPR	C#VGDMADTPR	2	2	2	0.0735615	0.0309061	0.0124439	3
O95793	523	STAU1	STAU1_C523	STAU1_HUMAN Double-stranded RNA-binding protein Staufen homolog 1 OS=Homo sapiens OX=9606 GN=STAU1 PE=1 SV=2	N	C#SSQPPLISH	C#SSQPPLISH	C#SSQPPLISHGIGK C#SSQPPLISH	1	1	4	0.0239709	0.00727688	0.0112753	3
P62633	161	CNBP	CNBP_C161	CNBP_HUMAN Cellular nucleic acid-binding protein OS=Homo sapiens OX=9606 GN=CNBP PE=1 SV=1	R	C#GESGHLAR	C#GESGHLAR	C#GESGHLAR	2	2	4	0.0367736	0.033123	0.0130849	3
P78527	1904	PRKDC	PRKDC_C1904	PRKDC_HUMAN DNA-dependent protein kinase catalytic subunit OS=Homo sapiens OX=9606 GN=PRKDC PE=1 SV=3	S	C#ITEGNELTK	C#ITEGNELTK	C#ITEGNELTK	1	3	1	0.0240586	0.1924	0.0116129	3
Q9NVE7	451	PANK4	PANK4_C451	PANK4_HUMAN Pantothenate kinase 4 OS=Homo sapiens OX=9606 GN=PANK4 PE=1 SV=1	T	C#FEEALDGVVK	C#FEEALDGVVK	C#FEEALDGVVK	1	1	1	0.0246731	0.101009	0.00392065	3
Q16543	336	CDC37	CDC37_C336	CDC37_HUMAN Hsp90 co-chaperone Cdc37 OS=Homo sapiens OX=9606 GN=CDC37 PE=1 SV=1	R	C#IDSGLWVPNSK	C#IDSGLWVPNSK	C#IDSGLWVPNSK	1	1	1	0.0250476	0.0184073	0.00306124	3
Q99873	119	PRMT1	PRMT1_C119	ANM1_HUMAN Protein arginine N-methyltransferase 1 OS=Homo sapiens OX=9606 GN=PRMT1 PE=1 SV=3	E	C#SSISDYAVK	C#SSISDYAVK	C#SSISDYAVK	1	1	2	0.0251609	0.0067828	0.155569	3
Q99439	215	CNN2	CNN2_C215	CNN2_HUMAN Calponin-2 OS=Homo sapiens OX=9606 GN=CNN2 PE=1 SV=4	K	C#ASQVGMTAPGTR	C#ASQVGMTAPGTR	C#ASQVGMTAPGTR	2	2	1	0.0298536	0.00801686	0.0205645	3
Q15185	40	PTGES3	PTGES3_C40	TEBP_HUMAN Prostaglandin E synthase 3 OS=Homo sapiens OX=9606 GN=PTGES3 PE=1 SV=1	S	C#LGGSDNFK	C#LGGSDNFK C#LGGSDNF	C#LGGSDNFK	3	3	2	0.0368643	0.0420517	0.014383	3
Q9BQG0	968	MYBBP1A	MYBBP1A_C968	MBB1A_HUMAN Myb-binding protein 1A OS=Homo sapiens OX=9606 GN=MYBBP1A PE=1 SV=2	S	C#LDLNLVTR	C#LDLNLVTR	C#LDLNLVTR	1	1	1	0.0276293	0.0383252	0.0318811	3
Q15185	58	PTGES3	PTGES3_C58	TEBP_HUMAN Prostaglandin E synthase 3 OS=Homo sapiens OX=9606 GN=PTGES3 PE=1 SV=1	H	C#IDPNDSK	C#IDPNDSK	C#IDPNDSK	1	2	2	0.0276966	0.0683962	0.139774	3
P51610	1139	HCFC1	HCFC1_C1139	HCFC1_HUMAN Host cell factor 1 OS=Homo sapiens OX=9606 GN=HCFC1 PE=1 SV=2	A	C#AAGTPAVIR	C#AAGTPAVIR	C#AAGTPAVIR	1	1	2	0.0277791	0.018855	0.101525	3
Q08211	888	DHX9	DHX9_C888	DHX9_HUMAN ATP-dependent RNA helicase A OS=Homo sapiens OX=9606 GN=DHX9 PE=1 SV=4	T	C#FPEPFINEGK	C#FPEPFINEGK	C#FPEPFINEGK	1	1	1	0.0293658	0.118108	0.0261436	3
P12268	140	IMPDH2	IMPDH2_C140	IMDH2_HUMAN Inosine-5'-monophosphate dehydrogenase 2 OS=Homo sapiens OX=9606 GN=IMPDH2 PE=1 SV=2	F	C#GIPITDTGR	C#GIPITDTGR	C#GIPITDTGR	2	3	4	0.0486871	0.0930536	0.0121955	3
Q9UL46	91	PSME2	PSME2_C91	PSME2_HUMAN Proteasome activator complex subunit 2 OS=Homo sapiens OX=9606 GN=PSME2 PE=1 SV=4	K	C#GFLPGNEK	C#GFLPGNEK	C#GFLPGNEK	1	1	2	0.0300451	0.0557813	0.0548355	3
P00492	23	HPRT1	HPRT1_C23	HPRT_HUMAN Hypoxanthine-guanine phosphoribosyltransferase OS=Homo sapiens OX=9606 GN=HPRT1 PE=1 SV=2	F	C#IPNHYAEDLER	C#IPNHYAEDLER C#IPNHY	C#IPNHYAEDLER	2	4	2	0.0582589	0.108163	0.00792268	3
Q9ULC4	113	MCTS1	MCTS1_C113	MCTS1_HUMAN Malignant T-cell-amplified sequence 1 OS=Homo sapiens OX=9606 GN=MCTS1 PE=1 SV=1	M	C#PGLTSPGAK	C#PGLTSPGAK	C#PGLTSPGAK	2	2	1	0.0326271	0.111631	0.00441435	3
Q5JRX3	313	PITRM1	PITRM1_C313	PREP_HUMAN Presequence protease, mitochondrial OS=Homo sapiens OX=9606 GN=PITRM1 PE=1 SV=3	T	C#GPDSFATDPSK	C#GPDSFATDPSK	C#GPDSFATDPSK	1	1	1	0.0328752	0.0563698	0.00500934	3
P53621	522	COPA	COPA_C522	COPA_HUMAN Coatomer subunit alpha OS=Homo sapiens OX=9606 GN=COPA PE=1 SV=2	L	C#NIHENIR	C#NIHENIR	C#NIHENIR	2	1	2	0.0865561	0.117659	0.0575191	3
P41252	185	IARS	IARS_C185	SYIC_HUMAN Isoleucine--tRNA ligase, cytoplasmic OS=Homo sapiens OX=9606 GN=IARS PE=1 SV=2	A	C#NTPLSNFESHQNYK C#NTPLSNFESH	C#NTPLSNFESHQNYK	C#NTPLSNFESHQNYK C#NTPLSNFESH	2	1	4	0.0379623	0.17833	0.0147368	3
O95757	290	HSPA4L	HSPA4L_C290	HS74L_HUMAN Heat shock 70 kDa protein 4L OS=Homo sapiens OX=9606 GN=HSPA4L PE=1 SV=3	E	C#FMNDLDVSSK	C#FMNDLDVSSK	C#FMNDLDVSSK	2	2	3	0.171457	0.0201356	0.000953145	3
P26641	266	EEF1G	EEF1G_C266	EF1G_HUMAN Elongation factor 1-gamma OS=Homo sapiens OX=9606 GN=EEF1G PE=1 SV=3	E	C#EQALAAEPK	C#EQALAAEPK	C#EQALAAEPK	1	1	2	0.0330828	0.0581068	0.0122905	3
Q7Z7H8	180	MRPL10	MRPL10_C180	RM10_HUMAN 39S ribosomal protein L10, mitochondrial OS=Homo sapiens OX=9606 GN=MRPL10 PE=1 SV=3	G	C#IDDTILSR	C#IDDTILSR	C#IDDTILSR	1	1	1	0.0341492	0.147154	0.0146145	3
Q92616	1595	GCN1	GCN1_C1595	GCN1_HUMAN eIF-2-alpha kinase activator GCN1 OS=Homo sapiens OX=9606 GN=GCN1 PE=1 SV=6	K	C#LQTLLDTK	C#LQTLLDTK	C#LQTLLDTK	1	1	1	0.0344659	0.0149131	0.0153907	3
P10768	56	ESD	ESD_C56	ESTD_HUMAN S-formylglutathione hydrolase OS=Homo sapiens OX=9606 GN=ESD PE=1 SV=2	T	C#TEQNFISK	C#TEQNFISK	C#TEQNFISK	1	1	1	0.0347778	0.0206204	0.0042962	3
P68104	411	EEF1A1	EEF1A1_C411	EF1A1_HUMAN Elongation factor 1-alpha 1 OS=Homo sapiens OX=9606 GN=EEF1A1 PE=1 SV=1	M	C#VESFSDYPPLGR	C#VESFSDYPPLGR	C#VESFSDYPPLGR	4	2	5	0.0465329	0.0968951	0.0117118	3
P41227	21	NAA10	NAA10_C21	NAA10_HUMAN N-alpha-acetyltransferase 10 OS=Homo sapiens OX=9606 GN=NAA10 PE=1 SV=1	L	C#LPENYQMK	C#LPENYQMK C#LPENY	C#LPENYQMK	3	2	2	0.0743646	0.195898	0.0530051	3
P54646	174	PRKAA2	PRKAA2_C174	AAPK2_HUMAN 5'-AMP-activated protein kinase catalytic subunit alpha-2 OS=Homo sapiens OX=9606 GN=PRKAA2 PE=1 SV=2	S	C#GSPNYAAPEVISGR	C#GSPNYAAPEVISGR	C#GSPNYAAPEVISGR	1	2	3	0.0359533	0.0550961	0.0103574	3
O60341	195	KDM1A	KDM1A_C195	KDM1A_HUMAN Lysine-specific histone demethylase 1A OS=Homo sapiens OX=9606 GN=KDM1A PE=1 SV=2	A	C#FPDIISGPQQTQK	C#FPDIISGPQQTQK	C#FPDIISGPQQTQK	2	2	2	0.0375899	0.0363741	0.0317833	3
Q14192	132	FHL2	FHL2_C132	FHL2_HUMAN Four and a half LIM domains protein 2 OS=Homo sapiens OX=9606 GN=FHL2 PE=1 SV=3	R	C#QQPIGTK	C#QQPIGTK	C#QQPIGTK	1	1	1	0.0372687	0.0339624	0.00538606	3
P04637	182	TP53	TP53_C182	P53_HUMAN Cellular tumor antigen p53 OS=Homo sapiens OX=9606 GN=TP53 PE=1 SV=4	R	C#SDSDGLAPPQHL	C#SDSDGLAPPQHLIR	C#SDSDGLAPPQHLIR	1	2	4	0.0374817	0.00305584	0.000947114	3
Q92616	1362	GCN1	GCN1_C1362	GCN1_HUMAN eIF-2-alpha kinase activator GCN1 OS=Homo sapiens OX=9606 GN=GCN1 PE=1 SV=6	S	C#LPPLVPAIK	C#LPPLVPAIK	C#LPPLVPAIK	1	1	1	0.0381953	0.108436	0.0672168	3
Q00765	18	REEP5	REEP5_C18	REEP5_HUMAN Receptor expression-enhancing protein 5 OS=Homo sapiens OX=9606 GN=REEP5 PE=1 SV=3	N	C#MTDLLAK	C#MTDLLAK	C#MTDLLAK	2	2	2	0.0440661	0.0572669	0.0242783	3
Q9UHB9	562	SRP68	SRP68_C562	SRP68_HUMAN Signal recognition particle subunit SRP68 OS=Homo sapiens OX=9606 GN=SRP68 PE=1 SV=2	F	C#LDPSLVTK	C#LDPSLVTK	C#LDPSLVTK	2	1	2	0.0399083	0.0111753	0.013941	3
Q13642	71	FHL1	FHL1_C71	FHL1_HUMAN Four and a half LIM domains protein 1 OS=Homo sapiens OX=9606 GN=FHL1 PE=1 SV=4	K	C#LHPLANETFVAK	C#LHPLANETFVAK	C#LHPLANETFVAK C#LHPLANETF C#LHPLANETFVA C#LHPLANET C#LHPLAN	1	1	7	0.0395711	0.00791099	0.0837257	3
Q02543	22	RPL18A	RPL18A_C22	RL18A_HUMAN 60S ribosomal protein L18a OS=Homo sapiens OX=9606 GN=RPL18A PE=1 SV=2	K	C#HTPPLYR	C#HTPPLYR	C#HTPPLYR C#HTPPLY	16	12	6	0.144788	0.11228	0.0387959	3
P62258	98	YWHAE	YWHAE_C98	1433E_HUMAN 14-3-3 protein epsilon OS=Homo sapiens OX=9606 GN=YWHAE PE=1 SV=1	C	C#DILDVLDK	C#DILDVLDK	C#DILDVLDK	2	1	1	0.045796	0.0322408	0.0111423	3
O75694	651	NUP155	NUP155_C651	NU155_HUMAN Nuclear pore complex protein Nup155 OS=Homo sapiens OX=9606 GN=NUP155 PE=1 SV=1	S	C#VTGPEIVYSGK	C#VTGPEIVYSGK	C#VTGPEIVYSGK	2	1	2	0.0825556	0.00708089	0.0111912	3
Q08211	438	DHX9	DHX9_C438	DHX9_HUMAN ATP-dependent RNA helicase A OS=Homo sapiens OX=9606 GN=DHX9 PE=1 SV=4	E	C#NIVVTQPR	C#NIVVTQPR	C#NIVVTQPR	1	2	1	0.0415807	0.0706895	0.00914465	3
P24666	91	ACP1	ACP1_C91	PPAC_HUMAN Low molecular weight phosphotyrosine protein phosphatase OS=Homo sapiens OX=9606 GN=ACP1 PE=1 SV=3	L	C#MDESNLR	C#MDESNLR	C#MDESNLR	2	1	2	0.136987	0.0754072	0.0323215	3
P42704	930	LRPPRC	LRPPRC_C930	LPPRC_HUMAN Leucine-rich PPR motif-containing protein, mitochondrial OS=Homo sapiens OX=9606 GN=LRPPRC PE=1 SV=3	R	C#VANNQVETLEK	C#VANNQVETLEK	C#VANNQVETLEK	1	1	1	0.044733	0.00171974	0.000681005	3
Q9UJX3	131	ANAPC7	ANAPC7_C131	APC7_HUMAN Anaphase-promoting complex subunit 7 OS=Homo sapiens OX=9606 GN=ANAPC7 PE=1 SV=4	Q	C#LPSEIEVK	C#LPSEIEVK	C#LPSEIEVK	2	1	1	0.0731968	0.0454204	0.0153595	3
P78527	4061	PRKDC	PRKDC_C4061	PRKDC_HUMAN DNA-dependent protein kinase catalytic subunit OS=Homo sapiens OX=9606 GN=PRKDC PE=1 SV=3	T	C#DELLLGHEK	C#DELLLGHEK	C#DELLLGHEK	2	2	2	0.1014	0.04107	0.0107609	3
Q96A26	41	FAM162A	FAM162A_C41	F162A_HUMAN Protein FAM162A OS=Homo sapiens OX=9606 GN=FAM162A PE=1 SV=2	F	C#TKPQESPGAPSR	C#TKPQESPGAPSR	C#TKPQESPGAPSR	2	1	3	0.121937	0.0975516	0.212524	3
Q9Y3F4	305	STRAP	STRAP_C305	STRAP_HUMAN Serine-threonine kinase receptor-associated protein OS=Homo sapiens OX=9606 GN=STRAP PE=1 SV=1	K	C#VLPEEDSGELAKPK	C#VLPEEDSGELAKPK C#VLPEEDSGELAK	C#VLPEEDSGELAKPK C#VLPEEDSGELAK	2	3	4	0.051549	0.0189595	0.00593688	3
O75607	79	NPM3	NPM3_C79	NPM3_HUMAN Nucleoplasmin-3 OS=Homo sapiens OX=9606 GN=NPM3 PE=1 SV=3	E	C#NVVEVVAR	C#NVVEVVAR	C#NVVEVVAR	1	1	1	0.0504201	0.0631536	0.0723271	3
O00148	164	DDX39A	DDX39A_C164	DX39A_HUMAN ATP-dependent RNA helicase DDX39A OS=Homo sapiens OX=9606 GN=DDX39A PE=1 SV=2	N	C#PHVVVGTPGR	C#PHVVVGTPGR	C#PHVVVGTPGR	1	1	2	0.0524997	0.0226949	0.0231348	3
P22314	278	UBA1	UBA1_C278	UBA1_HUMAN Ubiquitin-like modifier-activating enzyme 1 OS=Homo sapiens OX=9606 GN=UBA1 PE=1 SV=3	I	C#DTSNFSDYIR	C#DTSNFSDYIR	C#DTSNFSDYIR	1	1	1	0.0558751	0.00751337	0.130994	3
P60891	41	PRPS1	PRPS1_C41	PRPS1_HUMAN Ribose-phosphate pyrophosphokinase 1 OS=Homo sapiens OX=9606 GN=PRPS1 PE=1 SV=2	T	C#VEIGESVR	C#VEIGESVR	C#VEIGESVR	2	1	1	0.0587615	0.0262012	0.00704428	3
P60228	328	EIF3E	EIF3E_C328	EIF3E_HUMAN Eukaryotic translation initiation factor 3 subunit E OS=Homo sapiens OX=9606 GN=EIF3E PE=1 SV=1	A	C#LEDFIENAR	C#LEDFIENAR	C#LEDFIENAR	1	1	1	0.0559928	0.0230174	0.0202457	3
P45880	13	VDAC2	VDAC2_C13	VDAC2_HUMAN Voltage-dependent anion-selective channel protein 2 OS=Homo sapiens OX=9606 GN=VDAC2 PE=1 SV=2	M	C#IPPSYADLGK	C#IPPSYADLGK	C#IPPSYADLGK	9	13	12	0.0713192	0.0810348	0.0356785	3
O14654	1065	IRS4	IRS4_C1065	IRS4_HUMAN Insulin receptor substrate 4 OS=Homo sapiens OX=9606 GN=IRS4 PE=1 SV=1	R	C#SEPPPVAR	C#SEPPPVAR	C#SEPPPVAR	3	2	4	0.0753508	0.0725183	0.0140249	3
Q08J23	758	NSUN2	NSUN2_C758	NSUN2_HUMAN tRNA (cytosine(34)-C(5))-methyltransferase OS=Homo sapiens OX=9606 GN=NSUN2 PE=1 SV=2	G	C#DPAGVHPPR	C#DPAGVHPPR	C#DPAGVHPPR	4	3	8	0.101099	0.0619114	0.0145339	3
P54577	442	YARS	YARS_C442	SYYC_HUMAN Tyrosine--tRNA ligase, cytoplasmic OS=Homo sapiens OX=9606 GN=YARS PE=1 SV=4	L	C#ASIEGINR	C#ASIEGINR	C#ASIEGINR	1	1	1	0.0579117	0.0313831	0.0389189	3
O00410	986	IPO5	IPO5_C986	IPO5_HUMAN Importin-5 OS=Homo sapiens OX=9606 GN=IPO5 PE=1 SV=4	D	C#VNVEEVLPH	C#VNVEEVLPH	C#VNVEEVLPH	1	3	3	0.0580477	0.128931	0.151052	3
P11310	159	ACADM	ACADM_C159	ACADM_HUMAN Medium-chain specific acyl-CoA dehydrogenase, mitochondrial OS=Homo sapiens OX=9606 GN=ACADM PE=1 SV=1	Y	C#VTEPGAGSDVAGIK	C#VTEPGAGSDVAGIK	C#VTEPGAGSDVAGIK	1	1	1	0.058303	0.191858	0.000267365	3
Q5JWF2	1008	GNAS	GNAS_C1008	GNAS1_HUMAN Guanine nucleotide-binding protein G(s) subunit alpha isoforms XLas OS=Homo sapiens OX=9606 GN=GNAS PE=1 SV=2	T	C#AVDTENIR	C#AVDTENIR	C#AVDTENIR	1	1	1	0.0598915	0.0929792	0.0358899	3
Q5VT52	1071	RPRD2	RPRD2_C1071	RPRD2_HUMAN Regulation of nuclear pre-mRNA domain-containing protein 2 OS=Homo sapiens OX=9606 GN=RPRD2 PE=1 SV=1	S	C#LDLPDSTEEK	C#LDLPDSTEEK	C#LDLPDSTEEK	1	1	2	0.061117	0.0656355	0.0763842	3
Q96SB3	272	PPP1R9B	PPP1R9B_C272	NEB2_HUMAN Neurabin-2 OS=Homo sapiens OX=9606 GN=PPP1R9B PE=1 SV=3	R	C#PAGQQPPQHR	C#PAGQQPPQHR	C#PAGQQPPQHR	1	2	1	0.0614029	0.112835	0.0605338	3
Q15393	641	SF3B3	SF3B3_C641	SF3B3_HUMAN Splicing factor 3B subunit 3 OS=Homo sapiens OX=9606 GN=SF3B3 PE=1 SV=4	L	C#IVEMGGTEK	C#IVEMGGTEK	C#IVEMGGTEK	1	1	2	0.0618708	0.0300944	0.00450259	3
P62979	149	RPS27A	RPS27A_C149	RS27A_HUMAN Ubiquitin-40S ribosomal protein S27a OS=Homo sapiens OX=9606 GN=RPS27A PE=1 SV=2	Y	C#FNKPEDK	C#FNKPEDK	C#FNKPEDK	3	2	4	0.202055	0.116013	0.0975102	3
P54136	369	RARS	RARS_C369	SYRC_HUMAN Arginine--tRNA ligase, cytoplasmic OS=Homo sapiens OX=9606 GN=RARS PE=1 SV=2	G	C#SIPLTIVK	C#SIPLTIVK	C#SIPLTIVK	1	1	1	0.0626003	0.0496142	0.0300778	3
P09211	48	GSTP1	GSTP1_C48	GSTP1_HUMAN Glutathione S-transferase P OS=Homo sapiens OX=9606 GN=GSTP1 PE=1 SV=2	S	C#LYGQLPK	C#LYGQLPK	C#LYGQLPK	2	1	2	0.0632594	0.0404685	0.0493777	3
P16615	997	ATP2A2	ATP2A2_C997	AT2A2_HUMAN Sarcoplasmic/endoplasmic reticulum calcium ATPase 2 OS=Homo sapiens OX=9606 GN=ATP2A2 PE=1 SV=1	E	C#VQPATK	C#VQPATK	C#VQPATK	2	1	1	0.207985	0.100054	0.155606	3
Q92616	648	GCN1	GCN1_C648	GCN1_HUMAN eIF-2-alpha kinase activator GCN1 OS=Homo sapiens OX=9606 GN=GCN1 PE=1 SV=6	L	C#VISGVPGLK	C#VISGVPGLK	C#VISGVPGLK	2	1	1	0.0693139	0.0381868	0.00826759	3
P45880	76	VDAC2	VDAC2_C76	VDAC2_HUMAN Voltage-dependent anion-selective channel protein 2 OS=Homo sapiens OX=9606 GN=VDAC2 PE=1 SV=2	W	C#EYGLTFTEK	C#EYGLTFTEK	C#EYGLTFTEK	1	1	2	0.0660772	0.0652667	0.0545718	3
Q9NP92	33	MRPS30	MRPS30_C33	RT30_HUMAN 39S ribosomal protein S30, mitochondrial OS=Homo sapiens OX=9606 GN=MRPS30 PE=1 SV=2	T	C#QDVAATPVAR	C#QDVAATPVAR	C#QDVAATPVAR	2	1	2	0.10482	0.028661	0.00741177	3
Q9Y6M5	447	SLC30A1	SLC30A1_C447	ZNT1_HUMAN Zinc transporter 1 OS=Homo sapiens OX=9606 GN=SLC30A1 PE=1 SV=3	C	C#GTLPQAPSGK	C#GTLPQAPSGK	C#GTLPQAPSGK	1	1	1	0.0671503	0.0592707	0.00972965	3
P55795	22	HNRNPH2	HNRNPH2_C22	HNRH2_HUMAN Heterogeneous nuclear ribonucleoprotein H2 OS=Homo sapiens OX=9606 GN=HNRNPH2 PE=1 SV=1	S	C#SADEVMR	C#SADEVMR	C#SADEVMR	1	2	1	0.0676393	0.0335861	0.0049262	3
Q99543	26	DNAJC2	DNAJC2_C26	DNJC2_HUMAN DnaJ homolog subfamily C member 2 OS=Homo sapiens OX=9606 GN=DNAJC2 PE=1 SV=4	L	C#QVEPVGR	C#QVEPVGR	C#QVEPVGR	1	1	1	0.0680003	0.0530315	0.0137001	3
O95372	171	LYPLA2	LYPLA2_C171	LYPA2_HUMAN Acyl-protein thioesterase 2 OS=Homo sapiens OX=9606 GN=LYPLA2 PE=1 SV=1	Q	C#HGELDPMVPVR	C#HGELDPMVPVR	C#HGELDPMVPVR	3	5	3	0.0897362	0.0753982	0.00486327	3
Q99797	281	MIPEP	MIPEP_C281	MIPEP_HUMAN Mitochondrial intermediate peptidase OS=Homo sapiens OX=9606 GN=MIPEP PE=1 SV=2	K	C#LEELLSSR	C#LEELLSSR	C#LEELLSSR	2	1	2	0.123864	0.0246716	0.243986	3
P42704	130	LRPPRC	LRPPRC_C130	LPPRC_HUMAN Leucine-rich PPR motif-containing protein, mitochondrial OS=Homo sapiens OX=9606 GN=LRPPRC PE=1 SV=3	S	C#GSLLPELK	C#GSLLPELK	C#GSLLPELK	1	1	2	0.106526	0.0247869	0.0551297	3
Q96CM8	254	ACSF2	ACSF2_C254	ACSF2_HUMAN Medium-chain acyl-CoA ligase ACSF2, mitochondrial OS=Homo sapiens OX=9606 GN=ACSF2 PE=1 SV=2	S	C#HDPINIQ	C#HDPINIQ	C#HDPINIQ	1	1	1	0.0703955	0.103313	0.208469	3
Q13685	355	AAMP	AAMP_C355	AAMP_HUMAN Angio-associated migratory cell protein OS=Homo sapiens OX=9606 GN=AAMP PE=1 SV=2	Q	C#QHQSGIVQ	C#QHQSGIVQ	C#QHQSGIVQ	1	1	1	0.0712424	0.0615506	0.046788	3
Q4VCS5	741	AMOT	AMOT_C741	AMOT_HUMAN Angiomotin OS=Homo sapiens OX=9606 GN=AMOT PE=1 SV=1	R	C#LDMEGR	C#LDMEGR	C#LDMEGR	2	2	3	0.155022	0.126217	0.111827	3
O15355	13	PPM1G	PPM1G_C13	PPM1G_HUMAN Protein phosphatase 1G OS=Homo sapiens OX=9606 GN=PPM1G PE=1 SV=1	K	C#SGDGVGAPR	C#SGDGVGAPR	C#SGDGVGAPR	1	1	4	0.0724964	0.269788	0.0104812	3
Q13526	57	PIN1	PIN1_C57	PIN1_HUMAN Peptidyl-prolyl cis-trans isomerase NIMA-interacting 1 OS=Homo sapiens OX=9606 GN=PIN1 PE=1 SV=1	R	C#SHLLVK	C#SHLLVK	C#SHLLVK	2	2	2	0.131293	0.0550166	0.0345606	3
Q9UGI8	164	TES	TES_C164	TES_HUMAN Testin OS=Homo sapiens OX=9606 GN=TES PE=1 SV=1	K	C#HELSPR	C#HELSPR	C#HELSPR	1	2	1	0.0728131	0.0340589	0.0101315	3
Q96FZ2	266	HMCES	HMCES_C266	HMCES_HUMAN Abasic site processing protein HMCES OS=Homo sapiens OX=9606 GN=HMCES PE=1 SV=1	E	C#LAPVDLVVK	C#LAPVDLVVK	C#LAPVDLVVK	1	1	1	0.0735333	0.0312411	0.0383425	3
P31689	302	DNAJA1	DNAJA1_C302	DNJA1_HUMAN DnaJ homolog subfamily A member 1 OS=Homo sapiens OX=9606 GN=DNAJA1 PE=1 SV=2	K	C#VLNEGMPIYR	C#VLNEGMPIYR	C#VLNEGMPIYR	2	3	3	0.164961	0.0967254	0.0173328	3
Q13111	79	CHAF1A	CHAF1A_C79	CAF1A_HUMAN Chromatin assembly factor 1 subunit A OS=Homo sapiens OX=9606 GN=CHAF1A PE=1 SV=3	N	C#HVGSDIDFRPK	C#HVGSDIDFRPK	C#HVGSDIDFRPK	1	3	3	0.0743096	0.0227838	0.0073022	3
P60981	46	DSTN	DSTN_C46	DEST_HUMAN Destrin OS=Homo sapiens OX=9606 GN=DSTN PE=1 SV=3	K	C#IIVEEGK	C#IIVEEGK	C#IIVEEGK	1	1	1	0.074677	0.0403329	0.0198508	3
Q9BQ04	89	RBM4B	RBM4B_C89	RBM4B_HUMAN RNA-binding protein 4B OS=Homo sapiens OX=9606 GN=RBM4B PE=1 SV=1	T	C#TNQELR	C#TNQELR	C#TNQELR	1	1	1	0.0750108	0.139716	0.0469408	3
P17812	491	CTPS1	CTPS1_C491	PYRG1_HUMAN CTP synthase 1 OS=Homo sapiens OX=9606 GN=CTPS1 PE=1 SV=2	K	C#LEEQGLK	C#LEEQGLK	C#LEEQGLK	1	1	1	0.0750302	0.0262645	0.244521	3
Q9Y3F4	340	STRAP	STRAP_C340	STRAP_HUMAN Serine-threonine kinase receptor-associated protein OS=Homo sapiens OX=9606 GN=STRAP PE=1 SV=1	D	C#IFPSAPDVK	C#IFPSAPDVK	C#IFPSAPDVK	2	1	1	0.163435	0.0507659	0.020378	3
O14929	376	HAT1	HAT1_C376	HAT1_HUMAN Histone acetyltransferase type B catalytic subunit OS=Homo sapiens OX=9606 GN=HAT1 PE=1 SV=1	K	C#LRPEELTNQ	C#LRPEELTNQ	C#LRPEELTNQM C#LRPEELTNQ C#LRPEEL C#LRPEELTN	3	1	5	0.307454	0.0673165	0.183706	3
Q12824	167	SMARCB1	SMARCB1_C167	SNF5_HUMAN SWI/SNF-related matrix-associated actin-dependent regulator of chromatin subfamily B member 1 OS=Homo sapiens OX=9606 GN=SMARCB1 PE=1 SV=2	L	C#FDDHDPAVIH	C#FDDHDPAVIH	C#FDDHDPAVIHEN C#FDDHDPAVIH	3	2	4	0.0795015	0.025388	0.0167444	3
O15523	315	DDX3Y	DDX3Y_C315	DDX3Y_HUMAN ATP-dependent RNA helicase DDX3Y OS=Homo sapiens OX=9606 GN=DDX3Y PE=1 SV=2	G	C#HLLVATPGR	C#HLLVATPGR	C#HLLVATPGR	2	1	2	0.0928959	0.35969	0.0338188	3
P49736	340	MCM2	MCM2_C340	MCM2_HUMAN DNA replication licensing factor MCM2 OS=Homo sapiens OX=9606 GN=MCM2 PE=1 SV=4	F	C#QSQNQEVKPG	C#QSQNQEVKPG	C#QSQNQEVKPGSCPECQ C#QSQNQEVKPG C#QSQNQEVKPGSCPECQSAGPF	1	1	5	0.0791203	0.0174696	0.105009	3
Q9BRR6	40	ADPGK	ADPGK_C40	ADPGK_HUMAN ADP-dependent glucokinase OS=Homo sapiens OX=9606 GN=ADPGK PE=1 SV=1	L	C#LGPAPAPPGPVSPEGR	C#LGPAPAPPGPVSPEGR	C#LGPAPAPPGPVSPEGR	2	2	3	0.207111	0.100669	0.0206596	3
P26640	381	VARS	VARS_C381	SYVC_HUMAN Valine--tRNA ligase OS=Homo sapiens OX=9606 GN=VARS PE=1 SV=4	G	C#DHAGIATQ	C#DHAGIATQ	C#DHAGIATQVVVEK C#DHAGIATQ	1	1	3	0.0802541	0.122794	0.000963581	3
Q9Y490	2161	TLN1	TLN1_C2161	TLN1_HUMAN Talin-1 OS=Homo sapiens OX=9606 GN=TLN1 PE=1 SV=3	F	C#SPEPPAK	C#SPEPPAK	C#SPEPPAK	1	1	2	0.0827748	0.0285684	0.0143731	3
O95861	42	BPNT1	BPNT1_C42	BPNT1_HUMAN 3'(2'),5'-bisphosphate nucleotidase 1 OS=Homo sapiens OX=9606 GN=BPNT1 PE=1 SV=1	T	C#ATDLQTK	C#ATDLQTK	C#ATDLQTK	1	1	2	0.0834453	0.0750025	0.0797464	3
P49368	279	CCT3	CCT3_C279	TCPG_HUMAN T-complex protein 1 subunit gamma OS=Homo sapiens OX=9606 GN=CCT3 PE=1 SV=4	L	C#EDIIQLKPDVVIT	C#EDIIQLKPDVVIT C#EDIIQLKPD	C#EDIIQLKPDVVIT C#EDIIQLKPDVVITEK C#EDIIQLKPD	2	2	4	0.200433	0.165841	0.249299	3
Q9H0H5	369	RACGAP1	RACGAP1_C369	RGAP1_HUMAN Rac GTPase-activating protein 1 OS=Homo sapiens OX=9606 GN=RACGAP1 PE=1 SV=1	H	C#VNEIEQR	C#VNEIEQR	C#VNEIEQR	1	2	1	0.0861946	0.0908686	0.0261197	3
Q14676	2021	MDC1	MDC1_C2021	MDC1_HUMAN Mediator of DNA damage checkpoint protein 1 OS=Homo sapiens OX=9606 GN=MDC1 PE=1 SV=3	C	C#GGTYLPSMPR	C#GGTYLPSMPR	C#GGTYLPSMPR	1	2	2	0.0869474	0.0443916	0.0622871	3
Q92621	698	NUP205	NUP205_C698	NU205_HUMAN Nuclear pore complex protein Nup205 OS=Homo sapiens OX=9606 GN=NUP205 PE=1 SV=3	R	C#EEYPLTR	C#EEYPLTR	C#EEYPLTR	1	1	1	0.0871811	0.0773821	0.235182	3
O43390	226	HNRNPR	HNRNPR_C226	HNRPR_HUMAN Heterogeneous nuclear ribonucleoprotein R OS=Homo sapiens OX=9606 GN=HNRNPR PE=1 SV=1	L	C#DSYEIRPGK	C#DSYEIRPGK C#DSYEIR	C#DSYEIRPGK C#DSYEIR	1	5	3	0.0880717	0.0618568	0.0146579	3
P17987	357	TCP1	TCP1_C357	TCPA_HUMAN T-complex protein 1 subunit alpha OS=Homo sapiens OX=9606 GN=TCP1 PE=1 SV=1	I	C#DDELILIK	C#DDELILIK	C#DDELILIK	1	2	1	0.0881135	0.180668	0.0925516	3
P78527	1312	PRKDC	PRKDC_C1312	PRKDC_HUMAN DNA-dependent protein kinase catalytic subunit OS=Homo sapiens OX=9606 GN=PRKDC PE=1 SV=3	K	C#FGTGAAGNR	C#FGTGAAGNR C#FGTGAA	C#FGTGAAGNR	2	2	1	0.105505	0.212955	0.0251379	3
P00558	99	PGK1	PGK1_C99	PGK1_HUMAN Phosphoglycerate kinase 1 OS=Homo sapiens OX=9606 GN=PGK1 PE=1 SV=3	D	C#VGPEVEK	C#VGPEVEK C#VGPEVEKA	C#VGPEVEK C#VGPEVEKA	1	2	2	0.0901143	0.116592	0.100764	3
Q9P2J5	92	LARS	LARS_C92	SYLC_HUMAN Leucine--tRNA ligase, cytoplasmic OS=Homo sapiens OX=9606 GN=LARS PE=1 SV=2	H	C#TGMPIK	C#TGMPIK	C#TGMPIK	2	2	2	0.106245	0.121919	0.0519748	3
O43175	281	PHGDH	PHGDH_C281	SERA_HUMAN D-3-phosphoglycerate dehydrogenase OS=Homo sapiens OX=9606 GN=PHGDH PE=1 SV=4	S	C#PHLGASTK	C#PHLGASTK	C#PHLGASTK C#PHLGAS	1	2	3	0.0905251	0.119663	0.0771119	3
Q9Y4X5	161	ARIH1	ARIH1_C161	ARI1_HUMAN E3 ubiquitin-protein ligase ARIH1 OS=Homo sapiens OX=9606 GN=ARIH1 PE=1 SV=2	E	C#HVINPSK	C#HVINPSK	C#HVINPSK	1	1	3	0.0916319	0.24076	0.0175941	3
Q13428	1012	TCOF1	TCOF1_C1012	TCOF_HUMAN Treacle protein OS=Homo sapiens OX=9606 GN=TCOF1 PE=1 SV=3	Q	C#LTPGIR	C#LTPGIR	C#LTPGIR	1	1	2	0.0916744	0.133559	0.0812996	3
O75616	150	ERAL1	ERAL1_C150	ERAL1_HUMAN GTPase Era, mitochondrial OS=Homo sapiens OX=9606 GN=ERAL1 PE=1 SV=2	R	C#QALGVITEK	C#QALGVITEK	C#QALGVITEK	1	1	1	0.0925315	0.0412606	0.000666436	3
P08754	305	GNAI3	GNAI3_C305	GNAI3_HUMAN Guanine nucleotide-binding protein G(i) subunit alpha OS=Homo sapiens OX=9606 GN=GNAI3 PE=1 SV=3	Q	C#QFEDLNR	C#QFEDLNR	C#QFEDLNR	1	2	1	0.0926071	0.164664	0.0308363	3
Q15021	286	NCAPD2	NCAPD2_C286	CND1_HUMAN Condensin complex subunit 1 OS=Homo sapiens OX=9606 GN=NCAPD2 PE=1 SV=3	K	C#PQELSR	C#PQELSR	C#PQELSR	1	1	1	0.0930652	0.0892823	0.0797389	3
Q9UBQ0	15	VPS29	VPS29_C15	VPS29_HUMAN Vacuolar protein sorting-associated protein 29 OS=Homo sapiens OX=9606 GN=VPS29 PE=1 SV=1	R	C#NSLPAK	C#NSLPAK	C#NSLPAK	1	1	2	0.0939595	0.114206	0.124047	3
Q9Y5Q8	242	GTF3C5	GTF3C5_C242	TF3C5_HUMAN General transcription factor 3C polypeptide 5 OS=Homo sapiens OX=9606 GN=GTF3C5 PE=1 SV=2	V	C#TNPVDR	C#TNPVDR	C#TNPVDR	1	1	1	0.0951452	0.133925	0.133805	3
Q96SN8	528	CDK5RAP2	CDK5RAP2_C528	CK5P2_HUMAN CDK5 regulatory subunit-associated protein 2 OS=Homo sapiens OX=9606 GN=CDK5RAP2 PE=1 SV=5	K	C#SSQQPPGSK	C#SSQQPPGSK	C#SSQQPPGSK	1	1	1	0.0966634	0.199756	0.0302562	3
Q14690	818	PDCD11	PDCD11_C818	RRP5_HUMAN Protein RRP5 homolog OS=Homo sapiens OX=9606 GN=PDCD11 PE=1 SV=3	Q	C#LEELQGVR	C#LEELQGVR	C#LEELQGVR	1	1	1	0.101047	0.0995755	0.0127794	3
Q68D10	433	SPTY2D1	SPTY2D1_C433	SPT2_HUMAN Protein SPT2 homolog OS=Homo sapiens OX=9606 GN=SPTY2D1 PE=1 SV=3	T	C#GPGQPASSSGGPGR	C#GPGQPASSSGGPGR	C#GPGQPASSSGGPGR	1	1	1	0.102945	0.0467778	0.000660759	3
Q9BTT0	123	ANP32E	ANP32E_C123	AN32E_HUMAN Acidic leucine-rich nuclear phosphoprotein 32 family member E OS=Homo sapiens OX=9606 GN=ANP32E PE=1 SV=1	N	C#EITNLEDYR	C#EITNLEDYR	C#EITNLEDYR	1	1	1	0.105503	0.194384	0.00357279	3
P20700	443	LMNB1	LMNB1_C443	LMNB1_HUMAN Lamin-B1 OS=Homo sapiens OX=9606 GN=LMNB1 PE=1 SV=2	V	C#IEEIDVDGK	C#IEEIDVDGK	C#IEEIDVDGK	1	1	1	0.106168	0.0798674	0.0035772	3
P49327	569	FASN	FASN_C569	FAS_HUMAN Fatty acid synthase OS=Homo sapiens OX=9606 GN=FASN PE=1 SV=3	S	C#MGLRPDGIVGH	C#MGLRPDGIVGH	C#MGLRPDGIVGH	1	1	1	0.106879	0.165056	0.0659145	3
Q13155	168	AIMP2	AIMP2_C168	AIMP2_HUMAN Aminoacyl tRNA synthase complex-interacting multifunctional protein 2 OS=Homo sapiens OX=9606 GN=AIMP2 PE=1 SV=2	K	C#FGEQNK	C#FGEQNK C#FGEQNKK	C#FGEQNKK C#FGEQNK	1	2	3	0.10745	0.146318	0.0391465	3
P62937	62	PPIA	PPIA_C62	PPIA_HUMAN Peptidyl-prolyl cis-trans isomerase A OS=Homo sapiens OX=9606 GN=PPIA PE=1 SV=2	M	C#QGGDFTR	C#QGGDFTR	C#QGGDFTR	1	1	2	0.108187	0.0364863	0.0630562	3
Q99707	324	MTR	MTR_C324	METH_HUMAN Methionine synthase OS=Homo sapiens OX=9606 GN=MTR PE=1 SV=2	C	C#GSTPDHIR	C#GSTPDHIR	C#GSTPDHIR	1	2	2	0.11216	0.204236	0.00837852	3
P31943	22	HNRNPH1	HNRNPH1_C22	HNRH1_HUMAN Heterogeneous nuclear ribonucleoprotein H OS=Homo sapiens OX=9606 GN=HNRNPH1 PE=1 SV=4	S	C#SADEVQR	C#SADEVQR	C#SADEVQR	1	2	1	0.11292	0.162246	0.00952882	3
Q9BUR5	78	APOO	APOO_C78	MIC26_HUMAN MICOS complex subunit MIC26 OS=Homo sapiens OX=9606 GN=APOO PE=1 SV=1	W	C#QETYSQTKPK	C#QETYSQTKPK	C#QETYSQTKPK C#QETYSQTK	2	2	3	0.181982	0.063758	0.0139787	3
Q92922	462	SMARCC1	SMARCC1_C462	SMRC1_HUMAN SWI/SNF complex subunit SMARCC1 OS=Homo sapiens OX=9606 GN=SMARCC1 PE=1 SV=3	N	C#IHVIER	C#IHVIER	C#IHVIER	5	1	3	0.280635	0.177871	0.170271	3
P14866	404	HNRNPL	HNRNPL_C404	HNRPL_HUMAN Heterogeneous nuclear ribonucleoprotein L OS=Homo sapiens OX=9606 GN=HNRNPL PE=1 SV=2	F	C#LYGNVEK C#LYGNVE	C#LYGNVEK	C#LYGNVEK	3	1	2	0.158039	0.0463047	0.0726127	3
Q14247	112	CTTN	CTTN_C112	SRC8_HUMAN Src substrate cortactin OS=Homo sapiens OX=9606 GN=CTTN PE=1 SV=2	H	C#SQVDSVR	C#SQVDSVR	C#SQVDSVR	1	1	1	0.117372	0.0467764	0.0166442	3
Q15654	387	TRIP6	TRIP6_C387	TRIP6_HUMAN Thyroid receptor-interacting protein 6 OS=Homo sapiens OX=9606 GN=TRIP6 PE=1 SV=3	H	C#IEDFHR	C#IEDFHR	C#IEDFHR	1	2	2	0.122027	0.163897	0.0813121	3
P23528	139	CFL1	CFL1_C139	COF1_HUMAN Cofilin-1 OS=Homo sapiens OX=9606 GN=CFL1 PE=1 SV=3	N	C#YEEVKDR	C#YEEVKDR C#YEEVK	C#YEEVKDR C#YEEVK	1	4	3	0.12229	0.282417	0.156753	3
P26368	464	U2AF2	U2AF2_C464	U2AF2_HUMAN Splicing factor U2AF 65 kDa subunit OS=Homo sapiens OX=9606 GN=U2AF2 PE=1 SV=4	Y	C#DPDSYHR	C#DPDSYHR	C#DPDSYHR	3	3	4	0.135426	0.0629026	0.0414413	3
Q96F86	47	EDC3	EDC3_C47	EDC3_HUMAN Enhancer of mRNA-decapping protein 3 OS=Homo sapiens OX=9606 GN=EDC3 PE=1 SV=1	K	C#LVPEVTFR	C#LVPEVTFR	C#LVPEVTFR	1	1	1	0.123292	0.0657011	0.0427146	3
P34932	290	HSPA4	HSPA4_C290	HSP74_HUMAN Heat shock 70 kDa protein 4 OS=Homo sapiens OX=9606 GN=HSPA4 PE=1 SV=4	E	C#FMNDVDVS	C#FMNDVDVS	C#FMNDVDVSGTMNR	1	1	3	0.123333	0.0312024	0.00074332	3
O14654	1055	IRS4	IRS4_C1055	IRS4_HUMAN Insulin receptor substrate 4 OS=Homo sapiens OX=9606 GN=IRS4 PE=1 SV=1	C	C#MDISLSPSR	C#MDISLSPSR	C#MDISLSPSR	3	2	3	0.246776	0.186075	0.0292827	3
P23526	421	AHCY	AHCY_C421	SAHH_HUMAN Adenosylhomocysteinase OS=Homo sapiens OX=9606 GN=AHCY PE=1 SV=4	S	C#DGPFKPDHYR	C#DGPFKPDHYR C#DGPFKPD	C#DGPFKPDHYR	3	4	4	0.179939	0.178751	0.0363384	3
Q9UBB4	165	ATXN10	ATXN10_C165	ATX10_HUMAN Ataxin-10 OS=Homo sapiens OX=9606 GN=ATXN10 PE=1 SV=1	S	C#LNHPDKK	C#LNHPDK	C#LNHPDK	1	1	1	0.125649	0.250225	0.250038	3
Q9Y678	169	COPG1	COPG1_C169	COPG1_HUMAN Coatomer subunit gamma-1 OS=Homo sapiens OX=9606 GN=COPG1 PE=1 SV=1	K	C#SFDVVK	C#SFDVVK	C#SFDVVK	1	1	1	0.126075	0.0892368	0.109524	3
Q9Y383	44	LUC7L2	LUC7L2_C44	LC7L2_HUMAN Putative RNA-binding protein Luc7-like 2 OS=Homo sapiens OX=9606 GN=LUC7L2 PE=1 SV=2	C	C#PHDVLSGTR C#PHDVLSGT	C#PHDVLSGT	C#PHDVLSGTR C#PHDVLSGT	2	1	3	0.135552	0.0984222	0.0436676	3
P68104	363	EEF1A1	EEF1A1_C363	EF1A1_HUMAN Elongation factor 1-alpha 1 OS=Homo sapiens OX=9606 GN=EEF1A1 PE=1 SV=1	D	C#HTAHIA	C#HTAHIA	C#HTAHIA	1	1	2	0.127212	0.0926096	0.21529	3
Q4VCS5	1047	AMOT	AMOT_C1047	AMOT_HUMAN Angiomotin OS=Homo sapiens OX=9606 GN=AMOT PE=1 SV=1	T	C#NPDKTDGPVFH	C#NPDKTDGPVFH C#NPDKTDGPVFHSN	C#NPDKTDGPVFHSN C#NPDKTDGPVFH	1	3	4	0.129493	0.0253653	0.00738513	3
Q7Z2W4	96	ZC3HAV1	ZC3HAV1_C96	ZCCHV_HUMAN Zinc finger CCCH-type antiviral protein 1 OS=Homo sapiens OX=9606 GN=ZC3HAV1 PE=1 SV=3	R	C#NYSQSER	C#NYSQSER	C#NYSQSER	1	1	1	0.129887	0.0639253	0.054476	3
Q96J01	25	THOC3	THOC3_C25	THOC3_HUMAN THO complex subunit 3 OS=Homo sapiens OX=9606 GN=THOC3 PE=1 SV=1	W	C#SVSSGPSR	C#SVSSGPSR	C#SVSSGPSR	2	1	2	0.13644	0.0356052	0.0945399	3
P14618	424	PKM	PKM_C424	KPYM_HUMAN Pyruvate kinase PKM OS=Homo sapiens OX=9606 GN=PKM PE=1 SV=4	C	C#SGAIIVL C#SGAIIVLTK	C#SGAIIVLTK C#SGAIIVLT	C#SGAIIVLTK C#SGAIIVL	3	2	4	0.1514	0.112144	0.106763	3
Q8IUH3	90	RBM45	RBM45_C90	RBM45_HUMAN RNA-binding protein 45 OS=Homo sapiens OX=9606 GN=RBM45 PE=1 SV=1	Q	C#LGPNDTKPIK	C#LGPNDTKPIK	C#LGPNDTKPIK	1	1	2	0.130577	0.257243	0.0195584	3
O00410	972	IPO5	IPO5_C972	IPO5_HUMAN Importin-5 OS=Homo sapiens OX=9606 GN=IPO5 PE=1 SV=4	N	C#ISAVGK	C#ISAVGK	C#ISAVGK	1	1	1	0.133514	0.0968312	0.36076	3
O75131	54	CPNE3	CPNE3_C54	CPNE3_HUMAN Copine-3 OS=Homo sapiens OX=9606 GN=CPNE3 PE=1 SV=1	N	C#LNPQFSK	C#LNPQFSK	C#LNPQFSK	1	2	1	0.133657	0.366353	0.0878166	3
Q9BQG0	109	MYBBP1A	MYBBP1A_C109	MBB1A_HUMAN Myb-binding protein 1A OS=Homo sapiens OX=9606 GN=MYBBP1A PE=1 SV=2	L	C#SILQQIQEK	C#SILQQIQEK	C#SILQQIQEK	1	1	2	0.135227	0.0104183	0.0843697	3
O75152	209	ZC3H11A	ZC3H11A_C209	ZC11A_HUMAN Zinc finger CCCH domain-containing protein 11A OS=Homo sapiens OX=9606 GN=ZC3H11A PE=1 SV=3	E	C#LNFGIK	C#LNFGIK	C#LNFGIK	1	1	1	0.135398	0.251424	0.154792	3
P49321	708	NASP	NASP_C708	NASP_HUMAN Nuclear autoantigenic sperm protein OS=Homo sapiens OX=9606 GN=NASP PE=1 SV=2	N	C#VTDISHLVR	C#VTDISHLVR C#VTDISHL	C#VTDISHLVR C#VTDISHL	1	3	3	0.13682	0.0610534	0.0309537	3
O00429	431	DNM1L	DNM1L_C431	DNM1L_HUMAN Dynamin-1-like protein OS=Homo sapiens OX=9606 GN=DNM1L PE=1 SV=2	R	C#VELVHEEMQR	C#VELVHEEMQR	C#VELVHEEMQR	1	2	4	0.138244	0.0168211	0.00952414	3
P55072	184	VCP	VCP_C184	TERA_HUMAN Transitional endoplasmic reticulum ATPase OS=Homo sapiens OX=9606 GN=VCP PE=1 SV=4	H	C#EGEPIKR	C#EGEPIKR	C#EGEPIKR	2	6	3	0.144144	0.319202	0.0307128	3
P13639	136	EEF2	EEF2_C136	EF2_HUMAN Elongation factor 2 OS=Homo sapiens OX=9606 GN=EEF2 PE=1 SV=4	V	C#VQTETVLR	C#VQTETVLR	C#VQTETVLR	1	1	1	0.138959	0.0595316	0.040646	3
P27694	503	RPA1	RPA1_C503	RFA1_HUMAN Replication protein A 70 kDa DNA-binding subunit OS=Homo sapiens OX=9606 GN=RPA1 PE=1 SV=2	K	C#DTEFPNFK	C#DTEFPNFK	C#DTEFPNFK	2	3	3	0.177585	0.0999608	0.0755203	3
P60842	134	EIF4A1	EIF4A1_C134	IF4A1_HUMAN Eukaryotic initiation factor 4A-I OS=Homo sapiens OX=9606 GN=EIF4A1 PE=1 SV=1	A	C#IGGTNVR	C#IGGTNVR	C#IGGTNVR	1	1	2	0.15191	0.221344	0.0966617	3
Q99460	104	PSMD1	PSMD1_C104	PSMD1_HUMAN 26S proteasome non-ATPase regulatory subunit 1 OS=Homo sapiens OX=9606 GN=PSMD1 PE=1 SV=2	K	C#IDHYTK	C#IDHYTK	C#IDHYTK	2	1	1	0.177663	0.152156	0.226949	3
Q9UHR5	172	SAP30BP	SAP30BP_C172	S30BP_HUMAN SAP30-binding protein OS=Homo sapiens OX=9606 GN=SAP30BP PE=1 SV=1	F	C#AIDELGTNYPK	C#AIDELGTNYPK	C#AIDELGTNYPK	1	1	1	0.15256	0.0268746	0.00119787	3
P51858	12	HDGF	HDGF_C12	HDGF_HUMAN Hepatoma-derived growth factor OS=Homo sapiens OX=9606 GN=HDGF PE=1 SV=1	K	C#GDLVFAK	C#GDLVFAK	C#GDLVFAK	1	1	2	0.155782	0.0549149	0.0785276	3
P49327	1759	FASN	FASN_C1759	FAS_HUMAN Fatty acid synthase OS=Homo sapiens OX=9606 GN=FASN PE=1 SV=3	R	C#LATHGR	C#LATHGR	C#LATHGR	1	1	1	0.15603	0.140149	0.182166	3
P16615	560	ATP2A2	ATP2A2_C560	AT2A2_HUMAN Sarcoplasmic/endoplasmic reticulum calcium ATPase 2 OS=Homo sapiens OX=9606 GN=ATP2A2 PE=1 SV=1	R	C#LALATHDNPLR	C#LALATHDNPLR	C#LALATHDNPLR	1	1	2	0.157284	0.334099	0.0194006	3
Q04917	112	YWHAH	YWHAH_C112	1433F_HUMAN 14-3-3 protein eta OS=Homo sapiens OX=9606 GN=YWHAH PE=1 SV=4	N	C#NDFQYESK	C#NDFQYESK	C#NDFQYESK	1	1	1	0.157703	0.0589554	0.0113973	3
P17987	236	TCP1	TCP1_C236	TCPA_HUMAN T-complex protein 1 subunit alpha OS=Homo sapiens OX=9606 GN=TCP1 PE=1 SV=1	A	C#LDFSLQK	C#LDFSLQK	C#LDFSLQK	1	1	1	0.159352	0.0940328	0.0568875	3
P62306	66	SNRPF	SNRPF_C66	RUXF_HUMAN Small nuclear ribonucleoprotein F OS=Homo sapiens OX=9606 GN=SNRPF PE=1 SV=1	R	C#NNVLYIR	C#NNVLYIR	C#NNVLYIR	1	1	1	0.162494	0.0366367	0.0675536	3
Q92499	668	DDX1	DDX1_C668	DDX1_HUMAN ATP-dependent RNA helicase DDX1 OS=Homo sapiens OX=9606 GN=DDX1 PE=1 SV=2	N	C#TISQVEPDIK	C#TISQVEPDIK	C#TISQVEPDIK	1	1	1	0.163924	0.0197786	0.010689	3
P26641	194	EEF1G	EEF1G_C194	EF1G_HUMAN Elongation factor 1-gamma OS=Homo sapiens OX=9606 GN=EEF1G PE=1 SV=3	T	C#INQPQFR	C#INQPQFR	C#INQPQFR	2	3	2	0.18795	0.0962329	0.13204	3
P13693	28	TPT1	TPT1_C28	TCTP_HUMAN Translationally-controlled tumor protein OS=Homo sapiens OX=9606 GN=TPT1 PE=1 SV=1	L	C#LEVEGK	C#LEVEGK	C#LEVEGK	1	1	1	0.164162	0.0708635	0.0438915	3
Q92888	815	ARHGEF1	ARHGEF1_C815	ARHG1_HUMAN Rho guanine nucleotide exchange factor 1 OS=Homo sapiens OX=9606 GN=ARHGEF1 PE=1 SV=2	F	C#RPGPEGQLA	C#RPGPEGQLA	C#RPGPEGQLAAT	1	1	1	0.167248	0.0863909	0.0747676	3
Q92945	436	KHSRP	KHSRP_C436	FUBP2_HUMAN Far upstream element-binding protein 2 OS=Homo sapiens OX=9606 GN=KHSRP PE=1 SV=4	K	C#GLVIGR	C#GLVIGR	C#GLVIGR	1	1	1	0.16737	0.084272	0.0408363	3
O75153	753	CLUH	CLUH_C753	CLU_HUMAN Clustered mitochondria protein homolog OS=Homo sapiens OX=9606 GN=CLUH PE=1 SV=2	S	C#QIPGLVK	C#QIPGLVK	C#QIPGLVK	1	1	2	0.171866	0.168208	0.215264	3
O14579	34	COPE	COPE_C34	COPE_HUMAN Coatomer subunit epsilon OS=Homo sapiens OX=9606 GN=COPE PE=1 SV=3	Q	C#INEAQR	C#INEAQR	C#INEAQR	2	1	1	0.214521	0.219449	0.093871	3
O15347	104	HMGB3	HMGB3_C104	HMGB3_HUMAN High mobility group protein B3 OS=Homo sapiens OX=9606 GN=HMGB3 PE=1 SV=4	F	C#SEFRPK	C#SEFRPK	C#SEFRPK	4	2	2	0.19111	0.148553	0.230935	3
P62495	302	ETF1	ETF1_C302	ERF1_HUMAN Eukaryotic peptide chain release factor subunit 1 OS=Homo sapiens OX=9606 GN=ETF1 PE=1 SV=3	Y	C#FGVEDTLK	C#FGVEDTLK	C#FGVEDTLK	1	1	1	0.176547	0.213884	0.303511	3
P62244	72	RPS15A	RPS15A_C72	RS15A_HUMAN 40S ribosomal protein S15a OS=Homo sapiens OX=9606 GN=RPS15A PE=1 SV=2	K	C#GVISPR	C#GVISPR	C#GVISPR	2	2	1	0.239911	0.231352	0.0479846	3
P15880	188	RPS2	RPS2_C188	RS2_HUMAN 40S ribosomal protein S2 OS=Homo sapiens OX=9606 GN=RPS2 PE=1 SV=2	R	C#GSVLVR	C#GSVLVR	C#GSVLVR	2	1	1	0.237404	0.114703	0.0452175	3
O43257	105	ZNHIT1	ZNHIT1_C105	ZNHI1_HUMAN Zinc finger HIT domain-containing protein 1 OS=Homo sapiens OX=9606 GN=ZNHIT1 PE=1 SV=1	A	C#AGPPSR	C#AGPPSR	C#AGPPSR	1	1	1	0.183177	0.128126	0.0765877	3
P14866	218	HNRNPL	HNRNPL_C218	HNRPL_HUMAN Heterogeneous nuclear ribonucleoprotein L OS=Homo sapiens OX=9606 GN=HNRNPL PE=1 SV=2	P	C#GPVQR	C#GPVQR	C#GPVQR	1	1	1	0.184197	0.129619	0.116358	3
O95801	110	TTC4	TTC4_C110	TTC4_HUMAN Tetratricopeptide repeat protein 4 OS=Homo sapiens OX=9606 GN=TTC4 PE=1 SV=3	K	C#ADPDLNAV	C#ADPDLNAV	C#ADPDLNAVLYTNR	1	2	3	0.185396	0.158592	0.00609035	3
Q9BRP1	100	PDCD2L	PDCD2L_C100	PDD2L_HUMAN Programmed cell death protein 2-like OS=Homo sapiens OX=9606 GN=PDCD2L PE=1 SV=1	Q	C#LQVPER	C#LQVPER	C#LQVPER	1	1	2	0.188838	0.121247	0.0856341	3
Q9Y4W2	306	LAS1L	LAS1L_C306	LAS1L_HUMAN Ribosomal biogenesis protein LAS1L OS=Homo sapiens OX=9606 GN=LAS1L PE=1 SV=2	E	C#VLAELK	C#VLAELK	C#VLAELK	1	1	1	0.189022	0.118654	0.244499	3
P62917	115	RPL8	RPL8_C115	RL8_HUMAN 60S ribosomal protein L8 OS=Homo sapiens OX=9606 GN=RPL8 PE=1 SV=2	C	C#LEEKPGDR	C#LEEKPGDR	C#LEEKPGDR	1	2	2	0.190783	0.0629775	0.105349	3
O95347	585	SMC2	SMC2_C585	SMC2_HUMAN Structural maintenance of chromosomes protein 2 OS=Homo sapiens OX=9606 GN=SMC2 PE=1 SV=2	R	C#IAPETLR	C#IAPETLR	C#IAPETLR	1	1	2	0.191002	0.0892026	0.091369	3
O75131	15	CPNE3	CPNE3_C15	CPNE3_HUMAN Copine-3 OS=Homo sapiens OX=9606 GN=CPNE3 PE=1 SV=1	S	C#ANLLDK	C#ANLLDK	C#ANLLDK	1	1	1	0.19254	0.0584382	0.0606619	3
Q9BQG0	890	MYBBP1A	MYBBP1A_C890	MBB1A_HUMAN Myb-binding protein 1A OS=Homo sapiens OX=9606 GN=MYBBP1A PE=1 SV=2	Y	C#HDLGER	C#HDLGER	C#HDLGER	1	2	1	0.198008	0.107035	0.0462893	3
Q9H9J2	53	MRPL44	MRPL44_C53	RM44_HUMAN 39S ribosomal protein L44, mitochondrial OS=Homo sapiens OX=9606 GN=MRPL44 PE=1 SV=1	R	C#PPPPVR	C#PPPPVR	C#PPPPVR	2	2	2	0.219027	0.213473	0.0674875	3
Q92667	389	AKAP1	AKAP1_C389	AKAP1_HUMAN A-kinase anchor protein 1, mitochondrial OS=Homo sapiens OX=9606 GN=AKAP1 PE=1 SV=1	S	C#VPVHQK	C#VPVHQK	C#VPVHQK C#VPVHQ	1	2	2	0.199421	0.15941	0.279505	3
P52788	237	SMS	SMS_C237	SPSY_HUMAN Spermine synthase OS=Homo sapiens OX=9606 GN=SMS PE=1 SV=2	T	C#GDVLDNLK	C#GDVLDNLK	C#GDVLDNLK	1	1	1	0.200823	0.0273196	0.0079579	3
Q96SI9	254	STRBP	STRBP_C254	STRBP_HUMAN Spermatid perinuclear RNA-binding protein OS=Homo sapiens OX=9606 GN=STRBP PE=1 SV=1	T	C#NRPLGAGEAL	C#NRPLGAGEAL	C#NRPLGAGEALR C#NRPLGAGEAL	1	1	4	0.201984	0.0972369	0.0584943	3
P78527	3293	PRKDC	PRKDC_C3293	PRKDC_HUMAN DNA-dependent protein kinase catalytic subunit OS=Homo sapiens OX=9606 GN=PRKDC PE=1 SV=3	G	C#SEQVLTVL	C#SEQVLTVLK C#SEQVLTVL	C#SEQVLTVLK	1	2	2	0.221363	0.10685	0.0500383	3
Q00610	459	CLTC	CLTC_C459	CLH1_HUMAN Clathrin heavy chain 1 OS=Homo sapiens OX=9606 GN=CLTC PE=1 SV=5	E	C#SEELGDLVK	C#SEELGDLVK	C#SEELGDLVK	1	1	1	0.208494	0.00597137	0.00147971	3
P62633	122	CNBP	CNBP_C122	CNBP_HUMAN Cellular nucleic acid-binding protein OS=Homo sapiens OX=9606 GN=CNBP PE=1 SV=1	S	C#GEFGHIQ	C#GEFGHIQ	C#GEFGHIQ C#GEFGH	1	1	2	0.209658	0.116419	0.237431	3
Q9H3K6	59	BOLA2	BOLA2_C59	BOLA2_HUMAN BolA-like protein 2 OS=Homo sapiens OX=9606 GN=BOLA2 PE=1 SV=1	A	C#LAEELPHIH	C#LAEELPHIH	C#LAEELPHIH	2	1	3	0.218807	0.0484777	0.00655103	3
Q9GZT3	48	SLIRP	SLIRP_C48	SLIRP_HUMAN SRA stem-loop-interacting RNA-binding protein, mitochondrial OS=Homo sapiens OX=9606 GN=SLIRP PE=1 SV=1	R	C#ILPFDK	C#ILPFDK	C#ILPFDK	1	2	1	0.211176	0.2584	0.115593	3
P63244	240	RACK1	RACK1_C240	RACK1_HUMAN Receptor of activated protein C kinase 1 OS=Homo sapiens OX=9606 GN=RACK1 PE=1 SV=3	L	C#FSPNR	C#FSPNR	C#FSPNR	3	2	2	0.282599	0.20015	0.147113	3
Q9Y520	895	PRRC2C	PRRC2C_C895	PRC2C_HUMAN Protein PRRC2C OS=Homo sapiens OX=9606 GN=PRRC2C PE=1 SV=4	A	C#FEAPDQK	C#FEAPDQK	C#FEAPDQK	1	1	1	0.217942	0.188541	0.0294597	3
O75439	62	PMPCB	PMPCB_C62	MPPB_HUMAN Mitochondrial-processing peptidase subunit beta OS=Homo sapiens OX=9606 GN=PMPCB PE=1 SV=2	T	C#LESGLR	C#LESGLR	C#LESGLR	2	1	1	0.289603	0.116659	0.075015	3
Q9C0C9	182	UBE2O	UBE2O_C182	UBE2O_HUMAN (E3-independent) E2 ubiquitin-conjugating enzyme OS=Homo sapiens OX=9606 GN=UBE2O PE=1 SV=3	N	C#IIYPVNSK	C#IIYPVNSK	C#IIYPVNSK	2	1	1	0.27808	0.0738787	0.0277499	3
P49773	84	HINT1	HINT1_C84	HINT1_HUMAN Histidine triad nucleotide-binding protein 1 OS=Homo sapiens OX=9606 GN=HINT1 PE=1 SV=2	K	C#AADLGLNK	C#AADLGLNK	C#AADLGLNK	1	1	1	0.226479	0.0173628	0.0100243	3
P55209	88	NAP1L1	NAP1L1_C88	NP1L1_HUMAN Nucleosome assembly protein 1-like 1 OS=Homo sapiens OX=9606 GN=NAP1L1 PE=1 SV=1	K	C#AQIEAK	C#AQIEAK	C#AQIEAK	1	1	1	0.226956	0.107836	0.0438446	3
Q8N8A6	420	DDX51	DDX51_C420	DDX51_HUMAN ATP-dependent RNA helicase DDX51 OS=Homo sapiens OX=9606 GN=DDX51 PE=1 SV=3	C	C#PQMPLQK	C#PQMPLQK	C#PQMPLQK	1	1	1	0.22788	0.159937	0.0528395	3
P14678	19	SNRPB	SNRPB_C19	RSMB_HUMAN Small nuclear ribonucleoprotein-associated proteins B and B' OS=Homo sapiens OX=9606 GN=SNRPB PE=1 SV=2	R	C#ILQDGR	C#ILQDGR	C#ILQDGR	1	1	2	0.228134	0.194298	0.241524	3
Q8N726	123	CDKN2A	CDKN2A_C123	ARF_HUMAN Tumor suppressor ARF OS=Homo sapiens OX=9606 GN=CDKN2A PE=1 SV=2	R	C#LGPSAR	C#LGPSAR	C#LGPSAR	1	1	1	0.228653	0.183382	0.136098	3
P42772	74	CDKN2B	CDKN2B_C74	CDN2B_HUMAN Cyclin-dependent kinase 4 inhibitor B OS=Homo sapiens OX=9606 GN=CDKN2B PE=1 SV=1	N	C#ADPATLTR	C#ADPATLTR	C#ADPATLTR	1	2	1	0.230811	0.0977142	0.0806076	3
P13639	812	EEF2	EEF2_C812	EF2_HUMAN Elongation factor 2 OS=Homo sapiens OX=9606 GN=EEF2 PE=1 SV=4	Q	C#VFDHW	C#VFDHW	C#VFDHWQILPGDPFDNSSR C#VFDHWQILPGDPFDNSSRPS C#VFDHWQ C#VFDHW	2	1	6	0.27045	0.203277	0.134971	3
Q99986	220	VRK1	VRK1_C220	VRK1_HUMAN Serine/threonine-protein kinase VRK1 OS=Homo sapiens OX=9606 GN=VRK1 PE=1 SV=1	R	C#HDGTIEFT	C#HDGTIEFT	C#HDGTIEFT	2	1	1	0.239515	0.0989176	0.0988294	3
Q13148	244	TARDBP	TARDBP_C244	TADBP_HUMAN TAR DNA-binding protein 43 OS=Homo sapiens OX=9606 GN=TARDBP PE=1 SV=1	L	C#GEDLIIK	C#GEDLIIK	C#GEDLIIK	1	1	1	0.23545	0.105326	0.015859	3
P11586	236	MTHFD1	MTHFD1_C236	C1TC_HUMAN C-1-tetrahydrofolate synthase, cytoplasmic OS=Homo sapiens OX=9606 GN=MTHFD1 PE=1 SV=3	D	C#GINYVPDDK	C#GINYVPDDK	C#GINYVPDDK	1	1	1	0.236398	0.0479687	0.0435879	3
O43175	48	PHGDH	PHGDH_C48	SERA_HUMAN D-3-phosphoglycerate dehydrogenase OS=Homo sapiens OX=9606 GN=PHGDH PE=1 SV=4	D	C#EGLIVR	C#EGLIVR	C#EGLIVR	1	1	2	0.23953	0.175216	0.244812	3
Q9Y520	620	PRRC2C	PRRC2C_C620	PRC2C_HUMAN Protein PRRC2C OS=Homo sapiens OX=9606 GN=PRRC2C PE=1 SV=4	S	C#NKEEEPVFTR	C#NKEEEPVFTR	C#NKEEEPVFTR	1	2	2	0.239912	0.0487353	0.00558772	3
P26599	23	PTBP1	PTBP1_C23	PTBP1_HUMAN Polypyrimidine tract-binding protein 1 OS=Homo sapiens OX=9606 GN=PTBP1 PE=1 SV=1	T	C#VTNGPFIM	C#VTNGPFIM	C#VTNGPFIM	1	1	1	0.241858	0.0255673	0.180896	3
P52272	653	HNRNPM	HNRNPM_C653	HNRPM_HUMAN Heterogeneous nuclear ribonucleoprotein M OS=Homo sapiens OX=9606 GN=HNRNPM PE=1 SV=3	A	C#QIFVR	C#QIFVR	C#QIFVR	3	1	3	0.250081	0.156832	0.192218	3
O00233	59	PSMD9	PSMD9_C59	PSMD9_HUMAN 26S proteasome non-ATPase regulatory subunit 9 OS=Homo sapiens OX=9606 GN=PSMD9 PE=1 SV=3	D	C#EGYPR	C#EGYPR	C#EGYPR	1	1	1	0.242774	0.181362	0.236962	3
Q9BWE0	167	REPIN1	REPIN1_C167	REPI1_HUMAN Replication initiator 1 OS=Homo sapiens OX=9606 GN=REPIN1 PE=1 SV=1	R	C#HPPAPEAR	C#HPPAPEAR	C#HPPAPEAR	1	2	3	0.243934	0.191309	0.0109054	3
P29692	247	EEF1D	EEF1D_C247	EF1D_HUMAN Elongation factor 1-delta OS=Homo sapiens OX=9606 GN=EEF1D PE=1 SV=5	Q	C#VVEDDKVGTD	C#VVEDDKVGTD	C#VVEDDKVGTDLLEEEITK C#VVEDDKVGTDLLEEEITKF	1	1	2	0.246353	0.0413236	0.0253873	3
P26358	1499	DNMT1	DNMT1_C1499	DNMT1_HUMAN DNA (cytosine-5)-methyltransferase 1 OS=Homo sapiens OX=9606 GN=DNMT1 PE=1 SV=2	W	C#LPHTGNR	C#LPHTGNR	C#LPHTGNR	1	2	3	0.246483	0.205143	0.109436	3
P48643	253	CCT5	CCT5_C253	TCPE_HUMAN T-complex protein 1 subunit epsilon OS=Homo sapiens OX=9606 GN=CCT5 PE=1 SV=1	T	C#PFEPPKPK	C#PFEPPKPK	C#PFEPPKPK	4	1	5	0.271981	0.312938	0.136153	3
Q02543	16	RPL18A	RPL18A_C16	RL18A_HUMAN 60S ribosomal protein L18a OS=Homo sapiens OX=9606 GN=RPL18A PE=1 SV=2	R	C#LPTPK	C#LPTPK	C#LPTPK	3	4	3	0.296341	0.210729	0.160218	3
O94973	491	AP2A2	AP2A2_C491	AP2A2_HUMAN AP-2 complex subunit alpha-2 OS=Homo sapiens OX=9606 GN=AP2A2 PE=1 SV=2	A	C#HENLVK	C#HENLVK	C#HENLVK	1	2	2	0.250586	0.109449	0.0484899	3
O43592	877	XPOT	XPOT_C877	XPOT_HUMAN Exportin-T OS=Homo sapiens OX=9606 GN=XPOT PE=1 SV=2	A	C#FLAPLK	C#FLAPLKQ C#FLAPLK	C#FLAPLK	1	3	1	0.253625	0.268128	0.139115	3
P61978	132	HNRNPK	HNRNPK_C132	HNRPK_HUMAN Heterogeneous nuclear ribonucleoprotein K OS=Homo sapiens OX=9606 GN=HNRNPK PE=1 SV=1	E	C#LNYQHYK	C#LNYQHYK	C#LNYQHYK C#LNYQHY	1	1	3	0.254271	0.0531652	0.0545667	3
O43447	131	PPIH	PPIH_C131	PPIH_HUMAN Peptidyl-prolyl cis-trans isomerase H OS=Homo sapiens OX=9606 GN=PPIH PE=1 SV=1	K	C#DWLDGK	C#DWLDGK	C#DWLDGK	1	2	2	0.254328	0.193051	0.246654	3
P10768	11	ESD	ESD_C11	ESTD_HUMAN S-formylglutathione hydrolase OS=Homo sapiens OX=9606 GN=ESD PE=1 SV=2	K	C#FGGLQK	C#FGGLQK C#FGGLQ	C#FGGLQK	2	2	2	0.270103	0.150092	0.0487258	3
O75643	428	SNRNP200	SNRNP200_C428	U520_HUMAN U5 small nuclear ribonucleoprotein 200 kDa helicase OS=Homo sapiens OX=9606 GN=SNRNP200 PE=1 SV=2	R	C#QLPDGSFR	C#QLPDGSFR	C#QLPDGSFR	1	1	1	0.256368	0.122928	0.0101542	3
Q9BTT0	87	ANP32E	ANP32E_C87	AN32E_HUMAN Acidic leucine-rich nuclear phosphoprotein 32 family member E OS=Homo sapiens OX=9606 GN=ANP32E PE=1 SV=1	K	C#PNLTYL	C#PNLTYLNLSGNK C#PNLTYL	C#PNLTYLNLSGNK C#PNLTYL	1	2	3	0.259131	0.0631695	0.0110148	3
O43175	295	PHGDH	PHGDH_C295	SERA_HUMAN D-3-phosphoglycerate dehydrogenase OS=Homo sapiens OX=9606 GN=PHGDH PE=1 SV=4	R	C#GEEIAVQF C#GEEIAVQ	C#GEEIAVQF	C#GEEIAVQFVDMVK C#GEEIAVQF	2	1	3	0.265819	0.0775436	0.0253209	3
Q14694	254	USP10	USP10_C254	UBP10_HUMAN Ubiquitin carboxyl-terminal hydrolase 10 OS=Homo sapiens OX=9606 GN=USP10 PE=1 SV=2	S	C#FPAEAGR	C#FPAEAGR	C#FPAEAGR	1	1	2	0.262406	0.232785	0.140536	3
Q13045	232	FLII	FLII_C232	FLII_HUMAN Protein flightless-1 homolog OS=Homo sapiens OX=9606 GN=FLII PE=1 SV=2	S	C#NDLTR	C#NDLTR	C#NDLTR	1	1	1	0.262832	0.197432	0.279665	3
Q0VDF9	304	HSPA14	HSPA14_C304	HSP7E_HUMAN Heat shock 70 kDa protein 14 OS=Homo sapiens OX=9606 GN=HSPA14 PE=1 SV=1	L	C#SPLFNK	C#SPLFNK	C#SPLFNK	1	1	1	0.263575	0.397647	0.163706	3
P50991	295	CCT4	CCT4_C295	TCPD_HUMAN T-complex protein 1 subunit delta OS=Homo sapiens OX=9606 GN=CCT4 PE=1 SV=4	G	C#NVLLIQK	C#NVLLIQK	C#NVLLIQK	1	1	1	0.264951	0.0739588	0.0449476	3
Q4J6C6	227	PREPL	PREPL_C227	PPCEL_HUMAN Prolyl endopeptidase-like OS=Homo sapiens OX=9606 GN=PREPL PE=1 SV=1	R	C#HDVYR	C#HDVYR	C#HDVYR	2	3	3	0.320352	0.175024	0.138782	3
Q6L8Q7	250	PDE12	PDE12_C250	PDE12_HUMAN 2',5'-phosphodiesterase 12 OS=Homo sapiens OX=9606 GN=PDE12 PE=1 SV=2	H	C#TPGDGQR	C#TPGDGQR	C#TPGDGQR	1	1	1	0.272051	0.235101	0.0367431	3
P46782	66	RPS5	RPS5_C66	RS5_HUMAN 40S ribosomal protein S5 OS=Homo sapiens OX=9606 GN=RPS5 PE=1 SV=4	Q	C#PIVER	C#PIVER	C#PIVER	1	1	1	0.275505	0.335678	0.273384	3
O14602	51	EIF1AY	EIF1AY_C51	IF1AY_HUMAN Eukaryotic translation initiation factor 1A, Y-chromosomal OS=Homo sapiens OX=9606 GN=EIF1AY PE=1 SV=4	L	C#FDGVK	C#FDGVK	C#FDGVK	1	1	1	0.277274	0.276879	0.223956	3
P53618	877	COPB1	COPB1_C877	COPB_HUMAN Coatomer subunit beta OS=Homo sapiens OX=9606 GN=COPB1 PE=1 SV=3	K	C#LTPEK	C#LTPEK	C#LTPEK	2	2	2	0.320775	0.266425	0.189455	3
Q14974	826	KPNB1	KPNB1_C826	IMB1_HUMAN Importin subunit beta-1 OS=Homo sapiens OX=9606 GN=KPNB1 PE=1 SV=2	L	C#TAFGK	C#TAFGK	C#TAFGK	1	1	1	0.28005	0.284897	0.227237	3
P13797	566	PLS3	PLS3_C566	PLST_HUMAN Plastin-3 OS=Homo sapiens OX=9606 GN=PLS3 PE=1 SV=4	G	C#INYDLVK	C#INYDLVK	C#INYDLVK	1	1	1	0.284097	0.165638	0.0177674	3
P49327	1828	FASN	FASN_C1828	FAS_HUMAN Fatty acid synthase OS=Homo sapiens OX=9606 GN=FASN PE=1 SV=3	K	C#TVFHGA	C#TVFHGA	C#TVFHGAQVEDAFR C#TVFHGA	2	1	4	0.315176	0.198498	0.0642696	3
Q3SXM5	265	HSDL1	HSDL1_C265	HSDL1_HUMAN Inactive hydroxysteroid dehydrogenase-like protein 1 OS=Homo sapiens OX=9606 GN=HSDL1 PE=1 SV=3	R	C#SWLVPSPK	C#SWLVPSPK	C#SWLVPSPK	1	1	1	0.285435	0.0695055	0.0479988	3
Q53H12	34	AGK	AGK_C34	AGK_HUMAN Acylglycerol kinase, mitochondrial OS=Homo sapiens OX=9606 GN=AGK PE=1 SV=2	H	C#DNLLR	C#DNLLR	C#DNLLR	2	1	2	0.321797	0.304366	0.271746	3
O15173	159	PGRMC2	PGRMC2_C159	PGRC2_HUMAN Membrane-associated progesterone receptor component 2 OS=Homo sapiens OX=9606 GN=PGRMC2 PE=1 SV=1	F	C#LDKDALR	C#LDKDALR	C#LDKDALR	1	1	1	0.294694	0.158671	0.0541047	3
Q9UPT9	171	USP22	USP22_C171	UBP22_HUMAN Ubiquitin carboxyl-terminal hydrolase 22 OS=Homo sapiens OX=9606 GN=USP22 PE=1 SV=2	N	C#TIGLR	C#TIGLR	C#TIGLR	2	1	1	0.321454	0.20683	0.181965	3
Q15637	282	SF1	SF1_C282	SF01_HUMAN Splicing factor 1 OS=Homo sapiens OX=9606 GN=SF1 PE=1 SV=4	K	C#GGAGHIA	C#GGAGHIA	C#GGAGHIA	1	1	1	0.294874	0.13588	0.0771796	3
Q9UBM7	368	DHCR7	DHCR7_C368	DHCR7_HUMAN 7-dehydrocholesterol reductase OS=Homo sapiens OX=9606 GN=DHCR7 PE=1 SV=1	R	C#LIWGR	C#LIWGR	C#LIWGR	1	2	1	0.295587	0.254405	0.286653	3
Q9Y5B9	574	SUPT16H	SUPT16H_C574	SP16H_HUMAN FACT complex subunit SPT16 OS=Homo sapiens OX=9606 GN=SUPT16H PE=1 SV=1	Y	C#PGSALGR	C#PGSALGR	C#PGSALGR	1	1	1	0.301039	0.149493	0.152075	3
Q7KZF4	837	SND1	SND1_C837	SND1_HUMAN Staphylococcal nuclease domain-containing protein 1 OS=Homo sapiens OX=9606 GN=SND1 PE=1 SV=1	G	C#PHVTLQ	C#PHVTLQ	C#PHVTLQ C#PHVTLQFADSK	1	1	2	0.302351	0.131609	0.236012	3
O43837	233	IDH3B	IDH3B_C233	IDH3B_HUMAN Isocitrate dehydrogenase [NAD] subunit beta, mitochondrial OS=Homo sapiens OX=9606 GN=IDH3B PE=1 SV=2	C	C#EEVAELYPK	C#EEVAELYPK	C#EEVAELYPK	1	1	1	0.306646	0.114216	0.020603	3
P43487	132	RANBP1	RANBP1_C132	RANG_HUMAN Ran-specific GTPase-activating protein OS=Homo sapiens OX=9606 GN=RANBP1 PE=1 SV=1	E	C#PKPELL	C#PKPELL	C#PKPELLAIR C#PKPELL	1	1	2	0.30673	0.221922	0.11697	3
P30048	60	PRDX3	PRDX3_C60	PRDX3_HUMAN Thioredoxin-dependent peroxide reductase, mitochondrial OS=Homo sapiens OX=9606 GN=PRDX3 PE=1 SV=3	S	C#HAPAVT C#HAPAVTQ	C#HAPAVT C#HAPAVTQ	C#HAPAVT C#HAPAVTQ	2	2	4	0.336257	0.137671	0.0635377	3
Q9Y490	1939	TLN1	TLN1_C1939	TLN1_HUMAN Talin-1 OS=Homo sapiens OX=9606 GN=TLN1 PE=1 SV=3	Q	C#SPSDAYTK	C#SPSDAYTK	C#SPSDAYTK	1	1	2	0.311863	0.0339443	0.0462449	3
Q92973	620	TNPO1	TNPO1_C620	TNPO1_HUMAN Transportin-1 OS=Homo sapiens OX=9606 GN=TNPO1 PE=1 SV=2	R	C#VNLVQK	C#VNLVQK	C#VNLVQK	1	1	2	0.317225	0.135217	0.112414	3
O43390	292	HNRNPR	HNRNPR_C292	HNRPR_HUMAN Heterogeneous nuclear ribonucleoprotein R OS=Homo sapiens OX=9606 GN=HNRNPR PE=1 SV=1	F	C#FLEYEDHK	C#FLEYEDHK	C#FLEYEDHK	1	2	2	0.32026	0.103151	0.12472	3
P62829	125	RPL23	RPL23_C125	RL23_HUMAN 60S ribosomal protein L23 OS=Homo sapiens OX=9606 GN=RPL23 PE=1 SV=1	E	C#ADLWPR	C#ADLWPR	C#ADLWPR	2	4	3	0.342701	0.300372	0.104389	3
Q14684	583	RRP1B	RRP1B_C583	RRP1B_HUMAN Ribosomal RNA processing protein 1 homolog B OS=Homo sapiens OX=9606 GN=RRP1B PE=1 SV=3	L	C#GLPSQK	C#GLPSQK	C#GLPSQK	2	1	1	0.349737	0.151549	0.13521	3
Q15233	208	NONO	NONO_C208	NONO_HUMAN Non-POU domain-containing octamer-binding protein OS=Homo sapiens OX=9606 GN=NONO PE=1 SV=4	R	C#SEGSFLLT	C#SEGSFLLT	C#SEGSFLLTTFPR	1	1	1	0.328195	0.215589	0.093741	3
P17987	147	TCP1	TCP1_C147	TCPA_HUMAN T-complex protein 1 subunit alpha OS=Homo sapiens OX=9606 GN=TCP1 PE=1 SV=1	D	C#LINAAK	C#LINAAK	C#LINAAK	2	1	1	0.354442	0.164851	0.0332756	3
P48643	440	CCT5	CCT5_C440	TCPE_HUMAN T-complex protein 1 subunit epsilon OS=Homo sapiens OX=9606 GN=CCT5 PE=1 SV=1	K	C#PTLEQY	C#PTLEQY	C#PTLEQYAMR	1	1	2	0.336596	0.191937	0.182229	3
Q9Y490	1363	TLN1	TLN1_C1363	TLN1_HUMAN Talin-1 OS=Homo sapiens OX=9606 GN=TLN1 PE=1 SV=3	E	C#DNALR	C#DNALR	C#DNALR	1	1	1	0.339652	0.265129	0.395842	3
Q15365	201	PCBP1	PCBP1_C201	PCBP1_HUMAN Poly(rC)-binding protein 1 OS=Homo sapiens OX=9606 GN=PCBP1 PE=1 SV=2	R	C#SDAAGYPH	C#SDAAGYPH	C#SDAAGYPHATHDLEGPPLDAY C#SDAAGYPHAT C#SDAAGYPH	1	1	5	0.340171	0.189262	0.0346508	3
Q92599	49	SEPTIN8	SEPTIN8_C49	SEPT8_HUMAN Septin-8 OS=Homo sapiens OX=9606 GN=SEPTIN8 PE=1 SV=4	L	C#VGETGIGK	C#VGETGIGK	C#VGETGIGK	1	1	1	0.346038	0.0474969	0.0166437	3
Q14974	455	KPNB1	KPNB1_C455	IMB1_HUMAN Importin subunit beta-1 OS=Homo sapiens OX=9606 GN=KPNB1 PE=1 SV=2	Q	C#LIEGLSAEPR	C#LIEGLSAEPR	C#LIEGLSAEPR	1	1	1	0.350848	0.147512	0.0148243	3
P41440	246	SLC19A1	SLC19A1_C246	S19A1_HUMAN Reduced folate transporter OS=Homo sapiens OX=9606 GN=SLC19A1 PE=1 SV=3	A	C#GDSVLAR	C#GDSVLAR	C#GDSVLAR	1	1	1	0.352746	0.330827	0.106088	3
Q96RN5	588	MED15	MED15_C588	MED15_HUMAN Mediator of RNA polymerase II transcription subunit 15 OS=Homo sapiens OX=9606 GN=MED15 PE=1 SV=2	K	C#EIALEK	C#EIALEK	C#EIALEK	1	1	1	0.353949	0.102413	0.171943	3
O43447	47	PPIH	PPIH_C47	PPIH_HUMAN Peptidyl-prolyl cis-trans isomerase H OS=Homo sapiens OX=9606 GN=PPIH PE=1 SV=1	F	C#TGEFR	C#TGEFR	C#TGEFR	1	1	1	0.356416	0.274798	0.310232	3
Q14204	3940	DYNC1H1	DYNC1H1_C3940	DYHC1_HUMAN Cytoplasmic dynein 1 heavy chain 1 OS=Homo sapiens OX=9606 GN=DYNC1H1 PE=1 SV=5	S	C#LPAFK	C#LPAFK	C#LPAFK	1	1	1	0.363114	0.319186	0.353792	3
Q9UNS2	383	COPS3	COPS3_C383	CSN3_HUMAN COP9 signalosome complex subunit 3 OS=Homo sapiens OX=9606 GN=COPS3 PE=1 SV=3	K	C#IELDER	C#IELDER	C#IELDER	1	1	1	0.363821	0.124868	0.0736349	3
Q969Y2	46	GTPBP3	GTPBP3_C46	GTPB3_HUMAN tRNA modification GTPase GTPBP3, mitochondrial OS=Homo sapiens OX=9606 GN=GTPBP3 PE=1 SV=2	R	C#GIAVIR	C#GIAVIR	C#GIAVIR	1	2	2	0.364128	0.274191	0.152242	3
O14929	27	HAT1	HAT1_C27	HAT1_HUMAN Histone acetyltransferase type B catalytic subunit OS=Homo sapiens OX=9606 GN=HAT1 PE=1 SV=1	K	C#NTNTAIEL	C#NTNTAIELK C#NTNTAIEL	C#NTNTAIELK	1	2	2	0.366887	0.0505255	0.00241236	3
Q96BN8	17	OTULIN	OTULIN_C17	OTUL_HUMAN Ubiquitin thioesterase otulin OS=Homo sapiens OX=9606 GN=OTULIN PE=1 SV=3	S	C#AETPAR	C#AETPAR	C#AETPAR	1	1	2	0.367044	0.136592	0.191605	3
Q08211	242	DHX9	DHX9_C242	DHX9_HUMAN ATP-dependent RNA helicase A OS=Homo sapiens OX=9606 GN=DHX9 PE=1 SV=4	S	C#ALSLVR	C#ALSLVR	C#ALSLVR	1	1	1	0.368622	0.142703	0.0724325	3
O00410	1017	IPO5	IPO5_C1017	IPO5_HUMAN Importin-5 OS=Homo sapiens OX=9606 GN=IPO5 PE=1 SV=4	L	C#DLIESNHPIVLGPNNTNLPK	C#DLIESNHPIVLGPNNTNLPK	NA	1	1	NA	0.00044476	0.0304345	NA	2
Q5VWZ2	98	LYPLAL1	LYPLAL1_C98	LYPL1_HUMAN Lysophospholipase-like protein 1 OS=Homo sapiens OX=9606 GN=LYPLAL1 PE=1 SV=3	M	C#QVLTDLIDEEVK	NA	C#QVLTDLIDEEVK	1	NA	1	0.00365237	NA	0.00359511	2
Q9UBF2	325	COPG2	COPG2_C325	COPG2_HUMAN Coatomer subunit gamma-2 OS=Homo sapiens OX=9606 GN=COPG2 PE=1 SV=1	A	C#NLDLENLITDSNR	NA	C#NLDLENLITDSNR	2	NA	1	0.0625403	NA	0.000394101	2
Q7Z7H8	64	MRPL10	MRPL10_C64	RM10_HUMAN 39S ribosomal protein L10, mitochondrial OS=Homo sapiens OX=9606 GN=MRPL10 PE=1 SV=3	S	C#LPSPPSPPQEEIGLIR	NA	C#LPSPPSPPQEEIGLIR	1	NA	1	0.00387839	NA	0.139513	2
P05386	61	RPLP1	RPLP1_C61	RLA1_HUMAN 60S acidic ribosomal protein P1 OS=Homo sapiens OX=9606 GN=RPLP1 PE=1 SV=1	I	C#NVGAGGPAPAAGAAPA C#NVGAGGPAPAAG C#NVGAGGPAPAA C#NVGAGGPAPA	C#NVGAGGPAPAAGAAPA C#NVGAGGPAPA	NA	5	3	NA	0.0729029	0.0660562	NA	2
P78316	457	NOP14	NOP14_C457	NOP14_HUMAN Nucleolar protein 14 OS=Homo sapiens OX=9606 GN=NOP14 PE=1 SV=3	K	C#NHPSLAEGNK	NA	C#NHPSLAEGNK C#NHPSLAEGN	1	NA	3	0.00743614	NA	0.00114879	2
P17812	218	CTPS1	CTPS1_C218	PYRG1_HUMAN CTP synthase 1 OS=Homo sapiens OX=9606 GN=CTPS1 PE=1 SV=2	R	C#SNPLDTSVK	NA	C#SNPLDTSVK	2	NA	1	0.0143842	NA	0.00190118	2
P63000	6	RAC1	RAC1_C6	RAC1_HUMAN Ras-related C3 botulinum toxin substrate 1 OS=Homo sapiens OX=9606 GN=RAC1 PE=1 SV=1	K	C#VVVGDGAVGK	C#VVVGDGAVGK	NA	1	1	NA	0.00973495	0.0159682	NA	2
Q9H223	141	EHD4	EHD4_C141	EHD4_HUMAN EH domain-containing protein 4 OS=Homo sapiens OX=9606 GN=EHD4 PE=1 SV=1	M	C#SQLPNQVLK	NA	C#SQLPNQVLK	1	NA	1	0.0108638	NA	0.00371991	2
P30084	62	ECHS1	ECHS1_C62	ECHM_HUMAN Enoyl-CoA hydratase, mitochondrial OS=Homo sapiens OX=9606 GN=ECHS1 PE=1 SV=4	L	C#DGLIDELNQALK	NA	C#DGLIDELNQALK	1	NA	1	0.0130704	NA	0.00992189	2
Q16763	118	UBE2S	UBE2S_C118	UBE2S_HUMAN Ubiquitin-conjugating enzyme E2 S OS=Homo sapiens OX=9606 GN=UBE2S PE=1 SV=2	K	C#LLIHPNPESALNEEAGR	NA	C#LLIHPNPESALNEEAGR	1	NA	1	0.0140399	NA	0.000950349	2
P0DJJ0	357	SRGAP2C	SRGAP2C_C357	SRG2C_HUMAN SLIT-ROBO Rho GTPase-activating protein 2C OS=Homo sapiens OX=9606 GN=SRGAP2C PE=1 SV=1	L	C#AQQPVQSELVQR	C#AQQPVQSELVQR	NA	1	2	NA	0.0148268	0.0107438	NA	2
Q1ED39	78	KNOP1	KNOP1_C78	KNOP1_HUMAN Lysine-rich nucleolar protein 1 OS=Homo sapiens OX=9606 GN=KNOP1 PE=1 SV=1	L	C#EEHVEPETTLPAR	NA	C#EEHVEPETTLPAR	2	NA	1	0.0809678	NA	0.000752693	2
Q7L2E3	346	DHX30	DHX30_C346	DHX30_HUMAN ATP-dependent RNA helicase DHX30 OS=Homo sapiens OX=9606 GN=DHX30 PE=1 SV=1	P	C#TIQVPEPILR	NA	C#TIQVPEPILR	1	NA	3	0.0175843	NA	0.0439823	2
Q9UGN5	495	PARP2	PARP2_C495	PARP2_HUMAN Poly [ADP-ribose] polymerase 2 OS=Homo sapiens OX=9606 GN=PARP2 PE=1 SV=2	Q	C#NELLEANPK	C#NELLEANPK	NA	1	1	NA	0.0177627	0.0106064	NA	2
P62280	60	RPS11	RPS11_C60	RS11_HUMAN 40S ribosomal protein S11 OS=Homo sapiens OX=9606 GN=RPS11 PE=1 SV=3	K	C#PFTGNVSIR	NA	C#PFTGNVSIR	2	NA	1	0.0262429	NA	0.0676192	2
O15226	246	NKRF	NKRF_C246	NKRF_HUMAN NF-kappa-B-repressing factor OS=Homo sapiens OX=9606 GN=NKRF PE=1 SV=2	R	C#QNIYLTTGYAGSK	NA	C#QNIYLTTGYAGSK	1	NA	1	0.0225293	NA	0.000609148	2
P13639	751	EEF2	EEF2_C751	EF2_HUMAN Elongation factor 2 OS=Homo sapiens OX=9606 GN=EEF2 PE=1 SV=4	Q	C#PEQVVGGIY	C#PEQVVGGIY	NA	1	1	NA	0.0262385	0.0461403	NA	2
Q8N1F7	422	NUP93	NUP93_C422	NUP93_HUMAN Nuclear pore complex protein Nup93 OS=Homo sapiens OX=9606 GN=NUP93 PE=1 SV=2	V	C#FDDDGTSSPQDR	C#FDDDGTSSPQDR	NA	1	1	NA	0.0267062	0.00459057	NA	2
P05388	27	RPLP0	RPLP0_C27	RLA0_HUMAN 60S acidic ribosomal protein P0 OS=Homo sapiens OX=9606 GN=RPLP0 PE=1 SV=1	K	C#FIVGADNVGSK	NA	C#FIVGADNVGSK	1	NA	1	0.0270567	NA	0.00278588	2
Q96D46	383	NMD3	NMD3_C383	NMD3_HUMAN 60S ribosomal export protein NMD3 OS=Homo sapiens OX=9606 GN=NMD3 PE=1 SV=1	N	C#NLNDEHVNK	NA	C#NLNDEHVNK	1	NA	2	0.027163	NA	0.120331	2
P27694	531	RPA1	RPA1_C531	RFA1_HUMAN Replication protein A 70 kDa DNA-binding subunit OS=Homo sapiens OX=9606 GN=RPA1 PE=1 SV=2	T	C#FQESAEAILGQ	C#FQESAEAILGQ	NA	1	1	NA	0.0290245	0.124833	NA	2
Q9Y2L1	799	DIS3	DIS3_C799	RRP44_HUMAN Exosome complex exonuclease RRP44 OS=Homo sapiens OX=9606 GN=DIS3 PE=1 SV=2	D	C#TYPELTDK	NA	C#TYPELTDK	1	NA	1	0.0290809	NA	0.002687	2
P06132	66	UROD	UROD_C66	DCUP_HUMAN Uroporphyrinogen decarboxylase OS=Homo sapiens OX=9606 GN=UROD PE=1 SV=2	C	C#ELTLQPLR	NA	C#ELTLQPLR	1	NA	1	0.0293735	NA	0.00917278	2
Q8NFP7	131	NUDT10	NUDT10_C131	NUD10_HUMAN Diphosphoinositol polyphosphate phosphohydrolase 3-alpha OS=Homo sapiens OX=9606 GN=NUDT10 PE=1 SV=1	Q	C#HKPVHAE	NA	C#HKPVHAEYLEK	2	NA	1	0.0519096	NA	0.0713947	2
Q92526	233	CCT6B	CCT6B_C233	TCPW_HUMAN T-complex protein 1 subunit zeta-2 OS=Homo sapiens OX=9606 GN=CCT6B PE=1 SV=5	I	C#NVSLEYEK	NA	C#NVSLEYEK	1	NA	1	0.0298644	NA	0.015687	2
Q15424	362	SAFB	SAFB_C362	SAFB1_HUMAN Scaffold attachment factor B1 OS=Homo sapiens OX=9606 GN=SAFB PE=1 SV=4	A	C#NEVPPAPK	NA	C#NEVPPAPK	1	NA	6	0.0299125	NA	0.127961	2
P29966	321	MARCKS	MARCKS_C321	MARCS_HUMAN Myristoylated alanine-rich C-kinase substrate OS=Homo sapiens OX=9606 GN=MARCKS PE=1 SV=4	E	C#SPEAPPAEAAE	C#SPEAPPAEAAE	NA	1	1	NA	0.0326347	0.0901406	NA	2
Q6P158	1349	DHX57	DHX57_C1349	DHX57_HUMAN Putative ATP-dependent RNA helicase DHX57 OS=Homo sapiens OX=9606 GN=DHX57 PE=1 SV=2	R	C#ELDQLLQDK	C#ELDQLLQDK	NA	1	1	NA	0.0366448	0.0231957	NA	2
P49327	1448	FASN	FASN_C1448	FAS_HUMAN Fatty acid synthase OS=Homo sapiens OX=9606 GN=FASN PE=1 SV=3	N	C#ATSGVVGLVN C#ATSGVVGL	C#ATSGVVGLVN C#ATSGVVGL	NA	3	2	NA	0.0637216	0.0637665	NA	2
Q6P3X3	299	TTC27	TTC27_C299	TTC27_HUMAN Tetratricopeptide repeat protein 27 OS=Homo sapiens OX=9606 GN=TTC27 PE=1 SV=1	N	C#EFTPAPTPQEHLTK	NA	C#EFTPAPTPQEHLTK	2	NA	2	0.0833547	NA	0.00926596	2
P62333	170	PSMC6	PSMC6_C170	PRS10_HUMAN 26S proteasome regulatory subunit 10B OS=Homo sapiens OX=9606 GN=PSMC6 PE=1 SV=1	G	C#LLYGPPGTGK	NA	C#LLYGPPGTGK	1	NA	1	0.0394372	NA	0.00253551	2
P78527	3403	PRKDC	PRKDC_C3403	PRKDC_HUMAN DNA-dependent protein kinase catalytic subunit OS=Homo sapiens OX=9606 GN=PRKDC PE=1 SV=3	S	C#GPAAGVIDAY C#GPAAGVID	C#GPAAGVID	NA	2	2	NA	0.146169	0.137609	NA	2
Q96CS3	349	FAF2	FAF2_C349	FAF2_HUMAN FAS-associated factor 2 OS=Homo sapiens OX=9606 GN=FAF2 PE=1 SV=2	E	C#LPPEPSPDDPESVK	NA	C#LPPEPSPDDPESVK	1	NA	1	0.0420426	NA	0.153824	2
Q6L8Q7	108	PDE12	PDE12_C108	PDE12_HUMAN 2',5'-phosphodiesterase 12 OS=Homo sapiens OX=9606 GN=PDE12 PE=1 SV=2	A	C#SGPGPEPAVF	C#SGPGPEPAVF	NA	1	1	NA	0.043389	0.0219739	NA	2
P07814	381	EPRS	EPRS_C381	SYEP_HUMAN Bifunctional glutamate/proline--tRNA ligase OS=Homo sapiens OX=9606 GN=EPRS PE=1 SV=5	A	C#PIVDSIEGVTH	C#PIVDSIEGVTH	NA	1	1	NA	0.0450688	0.00230258	NA	2
Q16543	194	CDC37	CDC37_C194	CDC37_HUMAN Hsp90 co-chaperone Cdc37 OS=Homo sapiens OX=9606 GN=CDC37 PE=1 SV=1	W	C#IDLEVEEK	C#IDLEVEEK	NA	1	1	NA	0.0456481	0.0149354	NA	2
P30260	156	CDC27	CDC27_C156	CDC27_HUMAN Cell division cycle protein 27 homolog OS=Homo sapiens OX=9606 GN=CDC27 PE=1 SV=2	L	C#EIGEKPDPDQTFK	NA	C#EIGEKPDPDQTFK	1	NA	1	0.0461311	NA	0.00282784	2
Q13686	304	ALKBH1	ALKBH1_C304	ALKB1_HUMAN Nucleic acid dioxygenase ALKBH1 OS=Homo sapiens OX=9606 GN=ALKBH1 PE=1 SV=2	H	C#LEAPLPAVLPR	NA	C#LEAPLPAVLPR	1	NA	1	0.046157	NA	0.194103	2
Q96I24	125	FUBP3	FUBP3_C125	FUBP3_HUMAN Far upstream element-binding protein 3 OS=Homo sapiens OX=9606 GN=FUBP3 PE=1 SV=2	P	C#VLTGTPESIEQAK	NA	C#VLTGTPESIEQAK	1	NA	3	0.0488926	NA	0.0516717	2
Q9BST9	199	RTKN	RTKN_C199	RTKN_HUMAN Rhotekin OS=Homo sapiens OX=9606 GN=RTKN PE=1 SV=2	A	C#VEEEGALTGGPK	C#VEEEGALTGGPK	NA	1	1	NA	0.0525923	0.108149	NA	2
P04637	124	TP53	TP53_C124	P53_HUMAN Cellular tumor antigen p53 OS=Homo sapiens OX=9606 GN=TP53 PE=1 SV=4	T	C#TYSPALNK	C#TYSPALNK	NA	2	2	NA	0.102557	0.0777182	NA	2
P54886	612	ALDH18A1	ALDH18A1_C612	P5CS_HUMAN Delta-1-pyrroline-5-carboxylate synthase OS=Homo sapiens OX=9606 GN=ALDH18A1 PE=1 SV=2	A	C#NALETLLIHR	NA	C#NALETLLIHR	1	NA	1	0.0539943	NA	0.00401002	2
Q5J8M3	69	EMC4	EMC4_C69	EMC4_HUMAN ER membrane protein complex subunit 4 OS=Homo sapiens OX=9606 GN=EMC4 PE=1 SV=2	R	C#WDIALGPLK	NA	C#WDIALGPLK	1	NA	2	0.0560441	NA	0.188261	2
P63096	305	GNAI1	GNAI1_C305	GNAI1_HUMAN Guanine nucleotide-binding protein G(i) subunit alpha-1 OS=Homo sapiens OX=9606 GN=GNAI1 PE=1 SV=2	Q	C#QFEDLNK	NA	C#QFEDLNK	1	NA	1	0.0563571	NA	0.0246216	2
Q9BZE4	174	GTPBP4	GTPBP4_C174	NOG1_HUMAN Nucleolar GTP-binding protein 1 OS=Homo sapiens OX=9606 GN=GTPBP4 PE=1 SV=3	L	C#GYPNVGK	NA	C#GYPNVGK	2	NA	1	0.0656551	NA	0.00789311	2
P54136	34	RARS	RARS_C34	SYRC_HUMAN Arginine--tRNA ligase, cytoplasmic OS=Homo sapiens OX=9606 GN=RARS PE=1 SV=2	G	C#LGASPNLEQLQEENLK	NA	C#LGASPNLEQLQEENLK	1	NA	2	0.061109	NA	0.00028407	2
Q96EY8	119	MMAB	MMAB_C119	MMAB_HUMAN Corrinoid adenosyltransferase OS=Homo sapiens OX=9606 GN=MMAB PE=1 SV=1	Q	C#TLQDVGSAL	C#TLQDVGSAL	NA	1	1	NA	0.062776	0.0709248	NA	2
P46013	958	MKI67	MKI67_C958	KI67_HUMAN Proliferation marker protein Ki-67 OS=Homo sapiens OX=9606 GN=MKI67 PE=1 SV=2	K	C#APMSDLTDLK	NA	C#APMSDLTDLK	1	NA	2	0.0630938	NA	0.00535135	2
Q92613	160	JADE3	JADE3_C160	JADE3_HUMAN Protein Jade-3 OS=Homo sapiens OX=9606 GN=JADE3 PE=1 SV=1	G	C#GPVDENLMEK	NA	C#GPVDENLMEK	1	NA	1	0.0641891	NA	0.190206	2
Q9UBF8	89	PI4KB	PI4KB_C89	PI4KB_HUMAN Phosphatidylinositol 4-kinase beta OS=Homo sapiens OX=9606 GN=PI4KB PE=1 SV=1	R	C#LDDPPAQIR	NA	C#LDDPPAQIR	1	NA	1	0.0658757	NA	0.0411169	2
P31948	26	STIP1	STIP1_C26	STIP1_HUMAN Stress-induced-phosphoprotein 1 OS=Homo sapiens OX=9606 GN=STIP1 PE=1 SV=1	Q	C#YSEAIK	C#YSEAIK	NA	2	1	NA	0.0929044	0.121072	NA	2
Q9C0C2	136	TNKS1BP1	TNKS1BP1_C136	TB182_HUMAN 182 kDa tankyrase-1-binding protein OS=Homo sapiens OX=9606 GN=TNKS1BP1 PE=1 SV=4	R	C#AAPGGVR	NA	C#AAPGGVR	1	NA	1	0.0716371	NA	0.0920715	2
P30154	186	PPP2R1B	PPP2R1B_C186	2AAB_HUMAN Serine/threonine-protein phosphatase 2A 65 kDa regulatory subunit A beta isoform OS=Homo sapiens OX=9606 GN=PPP2R1B PE=1 SV=3	L	C#SDDTPMVR	C#SDDTPMVR	NA	2	1	NA	0.0798715	0.164928	NA	2
Q9H9E3	102	COG4	COG4_C102	COG4_HUMAN Conserved oligomeric Golgi complex subunit 4 OS=Homo sapiens OX=9606 GN=COG4 PE=1 SV=3	T	C#NLAENVSSK	NA	C#NLAENVSSK	1	NA	1	0.07374	NA	0.00604759	2
Q15345	743	LRRC41	LRRC41_C743	LRC41_HUMAN Leucine-rich repeat-containing protein 41 OS=Homo sapiens OX=9606 GN=LRRC41 PE=1 SV=3	N	C#IKPDGLLEFAK	NA	C#IKPDGLLEFAK	1	NA	1	0.0747365	NA	0.072187	2
Q13155	291	AIMP2	AIMP2_C291	AIMP2_HUMAN Aminoacyl tRNA synthase complex-interacting multifunctional protein 2 OS=Homo sapiens OX=9606 GN=AIMP2 PE=1 SV=2	G	C#SVTVPANVQR	NA	C#SVTVPANVQR	1	NA	1	0.0755489	NA	0.00822025	2
Q99829	200	CPNE1	CPNE1_C200	CPNE1_HUMAN Copine-1 OS=Homo sapiens OX=9606 GN=CPNE1 PE=1 SV=1	F	C#GGNPSTPIQVQ	C#GGNPSTPIQVQ	NA	1	1	NA	0.0801545	0.15197	NA	2
O75694	974	NUP155	NUP155_C974	NU155_HUMAN Nuclear pore complex protein Nup155 OS=Homo sapiens OX=9606 GN=NUP155 PE=1 SV=1	K	C#ITDTLQELVNQ	NA	C#ITDTLQELVNQSK	1	NA	2	0.080212	NA	0.0153357	2
Q96GQ7	321	DDX27	DDX27_C321	DDX27_HUMAN Probable ATP-dependent RNA helicase DDX27 OS=Homo sapiens OX=9606 GN=DDX27 PE=1 SV=2	T	C#LAVGGLDVK	NA	C#LAVGGLDVK	1	NA	1	0.082411	NA	0.136506	2
Q8WVV9	464	HNRNPLL	HNRNPLL_C464	HNRLL_HUMAN Heterogeneous nuclear ribonucleoprotein L-like OS=Homo sapiens OX=9606 GN=HNRNPLL PE=1 SV=1	L	C#VTEETFTK	NA	C#VTEETFTK	3	NA	1	0.141947	NA	0.0527545	2
P32322	120	PYCR1	PYCR1_C120	P5CR1_HUMAN Pyrroline-5-carboxylate reductase 1, mitochondrial OS=Homo sapiens OX=9606 GN=PYCR1 PE=1 SV=2	R	C#MTNTPVVVR	NA	C#MTNTPVVVR	2	NA	4	0.211987	NA	0.157333	2
Q9NSE4	155	IARS2	IARS2_C155	SYIM_HUMAN Isoleucine--tRNA ligase, mitochondrial OS=Homo sapiens OX=9606 GN=IARS2 PE=1 SV=2	D	C#HGLPIEIK	C#HGLPIEIK	NA	2	2	NA	0.218873	0.0779879	NA	2
P49915	554	GMPS	GMPS_C554	GUAA_HUMAN GMP synthase [glutamine-hydrolyzing] OS=Homo sapiens OX=9606 GN=GMPS PE=1 SV=1	M	C#HNVNR	C#HNVNR	NA	2	1	NA	0.216846	0.323742	NA	2
Q16630	476	CPSF6	CPSF6_C476	CPSF6_HUMAN Cleavage and polyadenylation specificity factor subunit 6 OS=Homo sapiens OX=9606 GN=CPSF6 PE=1 SV=2	D	C#LHGIESK	NA	C#LHGIESK	1	NA	2	0.0862781	NA	0.0984571	2
Q9Y3A5	119	SBDS	SBDS_C119	SBDS_HUMAN Ribosome maturation protein SBDS OS=Homo sapiens OX=9606 GN=SBDS PE=1 SV=4	K	C#VNPETK	NA	C#VNPETK	1	NA	2	0.0866011	NA	0.107265	2
P35579	671	MYH9	MYH9_C671	MYH9_HUMAN Myosin-9 OS=Homo sapiens OX=9606 GN=MYH9 PE=1 SV=4	R	C#IIPNHEK	C#IIPNHEK	NA	1	2	NA	0.0917244	0.135356	NA	2
Q15365	109	PCBP1	PCBP1_C109	PCBP1_HUMAN Poly(rC)-binding protein 1 OS=Homo sapiens OX=9606 GN=PCBP1 PE=1 SV=2	Q	C#GSLIGK	C#GSLIGK	NA	3	1	NA	0.110612	0.186451	NA	2
O75607	70	NPM3	NPM3_C70	NPM3_HUMAN Nucleoplasmin-3 OS=Homo sapiens OX=9606 GN=NPM3 PE=1 SV=3	L	C#LTEGAK	NA	C#LTEGAK	1	NA	1	0.0955014	NA	0.0249445	2
O15523	221	DDX3Y	DDX3Y_C221	DDX3Y_HUMAN ATP-dependent RNA helicase DDX3Y OS=Homo sapiens OX=9606 GN=DDX3Y PE=1 SV=2	A	C#AQTGSGK	NA	C#AQTGSGK	1	NA	1	0.0961712	NA	0.291992	2
P63000	105	RAC1	RAC1_C105	RAC1_HUMAN Ras-related C3 botulinum toxin substrate 1 OS=Homo sapiens OX=9606 GN=RAC1 PE=1 SV=1	H	C#PNTPIILVGT	NA	C#PNTPIILVGTK	1	NA	1	0.0975807	NA	0.00641928	2
Q9NW64	27	RBM22	RBM22_C27	RBM22_HUMAN Pre-mRNA-splicing factor RBM22 OS=Homo sapiens OX=9606 GN=RBM22 PE=1 SV=1	T	C#LGENPYIR	NA	C#LGENPYIR	1	NA	1	0.101425	NA	0.0432142	2
Q8N3C0	1042	ASCC3	ASCC3_C1042	ASCC3_HUMAN Activating signal cointegrator 1 complex subunit 3 OS=Homo sapiens OX=9606 GN=ASCC3 PE=1 SV=3	F	C#ELSTPGGVENSYGK	NA	C#ELSTPGGVENSYGK	1	NA	1	0.103731	NA	0.00341084	2
P62633	57	CNBP	CNBP_C57	CNBP_HUMAN Cellular nucleic acid-binding protein OS=Homo sapiens OX=9606 GN=CNBP PE=1 SV=1	R	C#GESGHLAK	NA	C#GESGHLAK	1	NA	1	0.107084	NA	0.148831	2
O00410	944	IPO5	IPO5_C944	IPO5_HUMAN Importin-5 OS=Homo sapiens OX=9606 GN=IPO5 PE=1 SV=4	F	C#TEALPLLVR	NA	C#TEALPLLVR	2	NA	1	0.178589	NA	0.00715339	2
Q96LD4	347	TRIM47	TRIM47_C347	TRI47_HUMAN E3 ubiquitin-protein ligase TRIM47 OS=Homo sapiens OX=9606 GN=TRIM47 PE=1 SV=2	G	C#GPGPGPPR	NA	C#GPGPGPPR	1	NA	1	0.110304	NA	0.0786683	2
Q9Y520	223	PRRC2C	PRRC2C_C223	PRC2C_HUMAN Protein PRRC2C OS=Homo sapiens OX=9606 GN=PRRC2C PE=1 SV=4	A	C#GPPQAK	C#GPPQAK	NA	1	1	NA	0.111032	0.079838	NA	2
O14950	109	MYL12B	MYL12B_C109	ML12B_HUMAN Myosin regulatory light chain 12B OS=Homo sapiens OX=9606 GN=MYL12B PE=1 SV=2	A	C#FDEEATGTIQ	C#FDEEATGTIQ	NA	1	1	NA	0.111221	0.0699024	NA	2
P61978	185	HNRNPK	HNRNPK_C185	HNRPK_HUMAN Heterogeneous nuclear ribonucleoprotein K OS=Homo sapiens OX=9606 GN=HNRNPK PE=1 SV=1	C	C#PHSTDR	NA	C#PHSTDR	3	NA	1	0.257357	NA	0.357766	2
P15924	1957	DSP	DSP_C1957	DESP_HUMAN Desmoplakin OS=Homo sapiens OX=9606 GN=DSP PE=1 SV=3	E	C#EWTVDTSK	NA	C#EWTVDTSK	1	NA	1	0.119053	NA	0.142407	2
P26583	106	HMGB2	HMGB2_C106	HMGB2_HUMAN High mobility group protein B2 OS=Homo sapiens OX=9606 GN=HMGB2 PE=1 SV=2	F	C#SEHRPK	NA	C#SEHRPK	1	NA	1	0.120611	NA	0.392936	2
P16615	404	ATP2A2	ATP2A2_C404	AT2A2_HUMAN Sarcoplasmic/endoplasmic reticulum calcium ATPase 2 OS=Homo sapiens OX=9606 GN=ATP2A2 PE=1 SV=1	N	C#HQYDGLVELA	C#HQYDGL	NA	1	1	NA	0.120619	0.232054	NA	2
P46777	100	RPL5	RPL5_C100	RL5_HUMAN 60S ribosomal protein L5 OS=Homo sapiens OX=9606 GN=RPL5 PE=1 SV=3	Y	C#TGLLLAR	NA	C#TGLLLAR	1	NA	1	0.122546	NA	0.0317011	2
Q9Y5B0	95	CTDP1	CTDP1_C95	CTDP1_HUMAN RNA polymerase II subunit A C-terminal domain phosphatase OS=Homo sapiens OX=9606 GN=CTDP1 PE=1 SV=3	L	C#AQPGQVVAPGAVLVR	C#AQPGQVVAPGAVLVR	NA	1	1	NA	0.123622	0.052077	NA	2
Q08J23	321	NSUN2	NSUN2_C321	NSUN2_HUMAN tRNA (cytosine(34)-C(5))-methyltransferase OS=Homo sapiens OX=9606 GN=NSUN2 PE=1 SV=2	T	C#SLNPIEDEAVIA	C#SLNPIEDEAVIA	NA	1	1	NA	0.125742	0.16938	NA	2
P78362	223	SRPK2	SRPK2_C223	SRPK2_HUMAN SRSF protein kinase 2 OS=Homo sapiens OX=9606 GN=SRPK2 PE=1 SV=3	M	C#VDDAYVR	C#VDDAYVR	NA	1	1	NA	0.127431	0.0521738	NA	2
Q9ULV4	420	CORO1C	CORO1C_C420	COR1C_HUMAN Coronin-1C OS=Homo sapiens OX=9606 GN=CORO1C PE=1 SV=1	K	C#DLISIPK	NA	C#DLISIPK	1	NA	1	0.130188	NA	0.039971	2
Q15021	1229	NCAPD2	NCAPD2_C1229	CND1_HUMAN Condensin complex subunit 1 OS=Homo sapiens OX=9606 GN=NCAPD2 PE=1 SV=3	Y	C#VSQLPLTER	NA	C#VSQLPLTER	1	NA	1	0.130806	NA	0.07991	2
P36551	373	CPOX	CPOX_C373	HEM6_HUMAN Oxygen-dependent coproporphyrinogen-III oxidase, mitochondrial OS=Homo sapiens OX=9606 GN=CPOX PE=1 SV=3	H	C#DDSFTPQEK	NA	C#DDSFTPQEK	1	NA	1	0.131413	NA	0.0549331	2
Q96I59	455	NARS2	NARS2_C455	SYNM_HUMAN Probable asparagine--tRNA ligase, mitochondrial OS=Homo sapiens OX=9606 GN=NARS2 PE=1 SV=3	Q	C#ILGVDNIK	C#ILGVDNIK	NA	1	1	NA	0.135677	0.103911	NA	2
Q9P0M6	286	H2AFY2	H2AFY2_C286	H2AW_HUMAN Core histone macro-H2A.2 OS=Homo sapiens OX=9606 GN=H2AFY2 PE=1 SV=3	K	C#EEQLEETIK	NA	C#EEQLEETIK	1	NA	2	0.137567	NA	0.028601	2
P14174	60	MIF	MIF_C60	MIF_HUMAN Macrophage migration inhibitory factor OS=Homo sapiens OX=9606 GN=MIF PE=1 SV=4	L	C#SLHSIGK	NA	C#SLHSIGK	1	NA	2	0.138764	NA	0.0441291	2
Q5TBB1	7	RNASEH2B	RNASEH2B_C7	RNH2B_HUMAN Ribonuclease H2 subunit B OS=Homo sapiens OX=9606 GN=RNASEH2B PE=1 SV=1	D	C#GDGVGAR	NA	C#GDGVGAR	1	NA	1	0.140801	NA	0.0182035	2
O60488	564	ACSL4	ACSL4_C564	ACSL4_HUMAN Long-chain-fatty-acid--CoA ligase 4 OS=Homo sapiens OX=9606 GN=ACSL4 PE=1 SV=2	G	C#LQIIDR	C#LQIIDR	NA	1	1	NA	0.141239	0.0951426	NA	2
P49454	853	CENPF	CENPF_C853	CENPF_HUMAN Centromere protein F OS=Homo sapiens OX=9606 GN=CENPF PE=1 SV=3	Q	C#EELVQIK	NA	C#EELVQIK	1	NA	1	0.143891	NA	0.0110697	2
Q92600	99	CNOT9	CNOT9_C99	CNOT9_HUMAN CCR4-NOT transcription complex subunit 9 OS=Homo sapiens OX=9606 GN=CNOT9 PE=1 SV=1	Q	C#VASHPETR	NA	C#VASHPETR	1	NA	3	0.144153	NA	0.0450576	2
Q7KZF4	268	SND1	SND1_C268	SND1_HUMAN Staphylococcal nuclease domain-containing protein 1 OS=Homo sapiens OX=9606 GN=SND1 PE=1 SV=1	S	C#HNQNILGTILHPN C#HNQNIL	C#HNQNIL C#HNQNILGT	NA	2	2	NA	0.183166	0.173959	NA	2
P52292	133	KPNA2	KPNA2_C133	IMA1_HUMAN Importin subunit alpha-1 OS=Homo sapiens OX=9606 GN=KPNA2 PE=1 SV=1	D	C#SPIQFESA	C#SPIQFESA	NA	1	1	NA	0.148441	0.346515	NA	2
Q15388	100	TOMM20	TOMM20_C100	TOM20_HUMAN Mitochondrial import receptor subunit TOM20 homolog OS=Homo sapiens OX=9606 GN=TOMM20 PE=1 SV=1	V	C#GQPQQLLQ C#GQPQQLLQVL C#GQPQQLL	C#GQPQQLL C#GQPQQLLQ	NA	3	2	NA	0.157508	0.0991384	NA	2
Q93009	315	USP7	USP7_C315	UBP7_HUMAN Ubiquitin carboxyl-terminal hydrolase 7 OS=Homo sapiens OX=9606 GN=USP7 PE=1 SV=2	T	C#VEGTIPK	NA	C#VEGTIPK	2	NA	2	0.199824	NA	0.0628155	2
Q96T76	848	MMS19	MMS19_C848	MMS19_HUMAN MMS19 nucleotide excision repair protein homolog OS=Homo sapiens OX=9606 GN=MMS19 PE=1 SV=2	D	C#TDVLTR	C#TDVLTR	NA	1	1	NA	0.152148	0.0947868	NA	2
Q13838	165	DDX39B	DDX39B_C165	DX39B_HUMAN Spliceosome RNA helicase DDX39B OS=Homo sapiens OX=9606 GN=DDX39B PE=1 SV=1	N	C#PHIVVGTPGR	C#PHIVVGTPGR	NA	2	1	NA	0.174788	0.0541447	NA	2
P23497	780	SP100	SP100_C780	SP100_HUMAN Nuclear autoantigen Sp-100 OS=Homo sapiens OX=9606 GN=SP100 PE=1 SV=3	F	C#SEYRPK	C#SEYRPK	NA	3	4	NA	0.233803	0.208888	NA	2
Q6PI48	108	DARS2	DARS2_C108	SYDM_HUMAN Aspartate--tRNA ligase, mitochondrial OS=Homo sapiens OX=9606 GN=DARS2 PE=1 SV=1	L	C#EAPVESVVQVS C#EAPVESVVQ	C#EAPVESVVQVS C#EAPVESVVQ	NA	2	2	NA	0.163066	0.108388	NA	2
Q9BWD1	65	ACAT2	ACAT2_C65	THIC_HUMAN Acetyl-CoA acetyltransferase, cytosolic OS=Homo sapiens OX=9606 GN=ACAT2 PE=1 SV=2	G	C#GQNPVR	NA	C#GQNPVR	1	NA	1	0.261225	NA	0.0637543	2
Q8ND56	85	LSM14A	LSM14A_C85	LS14A_HUMAN Protein LSM14 homolog A OS=Homo sapiens OX=9606 GN=LSM14A PE=1 SV=3	Q	C#SLPQDPAIVQ	C#SLPQDPAIVQ	NA	1	1	NA	0.164555	0.0356162	NA	2
P30154	402	PPP2R1B	PPP2R1B_C402	2AAB_HUMAN Serine/threonine-protein phosphatase 2A 65 kDa regulatory subunit A beta isoform OS=Homo sapiens OX=9606 GN=PPP2R1B PE=1 SV=3	D	C#VNEVIGIR	C#VNEVIGIR	NA	2	1	NA	0.232381	0.0354042	NA	2
P14618	474	PKM	PKM_C474	KPYM_HUMAN Pyruvate kinase PKM OS=Homo sapiens OX=9606 GN=PKM PE=1 SV=4	L	C#KDPVQEAW	NA	C#KDPVQEAWAE C#KDPVQEAW	2	NA	2	0.223419	NA	0.0965936	2
Q15527	93	SURF2	SURF2_C93	SURF2_HUMAN Surfeit locus protein 2 OS=Homo sapiens OX=9606 GN=SURF2 PE=1 SV=3	K	C#PEHVLR	NA	C#PEHVLR	1	NA	3	0.167892	NA	0.0385873	2
P23528	39	CFL1	CFL1_C39	COF1_HUMAN Cofilin-1 OS=Homo sapiens OX=9606 GN=CFL1 PE=1 SV=3	F	C#LSEDKK	NA	C#LSEDKK	1	NA	1	0.171809	NA	0.183077	2
Q8NBF2	716	NHLRC2	NHLRC2_C716	NHLC2_HUMAN NHL repeat-containing protein 2 OS=Homo sapiens OX=9606 GN=NHLRC2 PE=1 SV=1	G	C#IAPVELR	NA	C#IAPVELR	1	NA	2	0.172666	NA	0.0534231	2
P15374	95	UCHL3	UCHL3_C95	UCHL3_HUMAN Ubiquitin carboxyl-terminal hydrolase isozyme L3 OS=Homo sapiens OX=9606 GN=UCHL3 PE=1 SV=1	A	C#GTIGLIH	C#GTIGLIH	NA	1	1	NA	0.180444	0.129103	NA	2
Q13263	651	TRIM28	TRIM28_C651	TIF1B_HUMAN Transcription intermediary factor 1-beta OS=Homo sapiens OX=9606 GN=TRIM28 PE=1 SV=5	D	C#HLPALQ	C#HLPALQ	NA	2	2	NA	0.201392	0.13705	NA	2
P50570	27	DNM2	DNM2_C27	DYN2_HUMAN Dynamin-2 OS=Homo sapiens OX=9606 GN=DNM2 PE=1 SV=2	S	C#HLDLPQIA	NA	C#HLDLPQIA	1	NA	1	0.191882	NA	0.183875	2
Q00839	295	HNRNPU	HNRNPU_C295	HNRPU_HUMAN Heterogeneous nuclear ribonucleoprotein U OS=Homo sapiens OX=9606 GN=HNRNPU PE=1 SV=6	N	C#DLHFK	NA	C#DLHFK	3	NA	1	0.258349	NA	0.313661	2
Q9NSU2	70	TREX1	TREX1_C70	TREX1_HUMAN Three-prime repair exonuclease 1 OS=Homo sapiens OX=9606 GN=TREX1 PE=1 SV=2	L	C#VAPGK	C#VAPGK	NA	1	1	NA	0.201097	0.189149	NA	2
P62820	126	RAB1A	RAB1A_C126	RAB1A_HUMAN Ras-related protein Rab-1A OS=Homo sapiens OX=9606 GN=RAB1A PE=1 SV=3	K	C#DLTTK	NA	C#DLTTK	1	NA	1	0.201501	NA	0.0738596	2
O95602	613	POLR1A	POLR1A_C613	RPA1_HUMAN DNA-directed RNA polymerase I subunit RPA1 OS=Homo sapiens OX=9606 GN=POLR1A PE=1 SV=2	A	C#TDQQYLVPK	C#TDQQYLVPK	NA	1	1	NA	0.202938	0.113836	NA	2
Q08211	489	DHX9	DHX9_C489	DHX9_HUMAN ATP-dependent RNA helicase A OS=Homo sapiens OX=9606 GN=DHX9 PE=1 SV=4	F	C#TVGVLLR	C#TVGVLLR	NA	1	1	NA	0.206214	0.101145	NA	2
P08865	148	RPSA	RPSA_C148	RSSA_HUMAN 40S ribosomal protein SA OS=Homo sapiens OX=9606 GN=RPSA PE=1 SV=4	L	C#NTDSPLR	NA	C#NTDSPLR	1	NA	1	0.206492	NA	0.0198598	2
Q15061	175	WDR43	WDR43_C175	WDR43_HUMAN WD repeat-containing protein 43 OS=Homo sapiens OX=9606 GN=WDR43 PE=1 SV=3	L	C#ISPDGK	NA	C#ISPDGK	1	NA	1	0.20883	NA	0.151008	2
P22681	353	CBL	CBL_C353	CBL_HUMAN E3 ubiquitin-protein ligase CBL OS=Homo sapiens OX=9606 GN=CBL PE=1 SV=2	L	C#EPTPQDHIK	NA	C#EPTPQDHIK	1	NA	1	0.212101	NA	0.0309561	2
P23526	278	AHCY	AHCY_C278	SAHH_HUMAN Adenosylhomocysteinase OS=Homo sapiens OX=9606 GN=AHCY PE=1 SV=4	G	C#IDIILGR	NA	C#IDIILGR	1	NA	1	0.216998	NA	0.263237	2
O95388	123	WISP1	WISP1_C123	WISP1_HUMAN WNT1-inducible-signaling pathway protein 1 OS=Homo sapiens OX=9606 GN=WISP1 PE=1 SV=1	G	C#VLDGVR	NA	C#VLDGVR	1	NA	1	0.217629	NA	0.0569294	2
P50991	252	CCT4	CCT4_C252	TCPD_HUMAN T-complex protein 1 subunit delta OS=Homo sapiens OX=9606 GN=CCT4 PE=1 SV=4	F	C#LSAPK	NA	C#LSAPK	1	NA	1	0.252889	NA	0.201113	2
Q14008	1360	CKAP5	CKAP5_C1360	CKAP5_HUMAN Cytoskeleton-associated protein 5 OS=Homo sapiens OX=9606 GN=CKAP5 PE=1 SV=3	V	C#QPTPGK	C#QPTPGK	NA	1	1	NA	0.228449	0.0809179	NA	2
Q9Y4C2	598	TCAF1	TCAF1_C598	TCAF1_HUMAN TRPM8 channel-associated factor 1 OS=Homo sapiens OX=9606 GN=TCAF1 PE=1 SV=3	C	C#LDKPTK	C#LDKPTK	NA	1	1	NA	0.236855	0.201048	NA	2
Q9BXW9	893	FANCD2	FANCD2_C893	FACD2_HUMAN Fanconi anemia group D2 protein OS=Homo sapiens OX=9606 GN=FANCD2 PE=1 SV=2	E	C#DPTPSHR	C#DPTPSHR	NA	1	1	NA	0.239455	0.262793	NA	2
P49792	1375	RANBP2	RANBP2_C1375	RBP2_HUMAN E3 SUMO-protein ligase RanBP2 OS=Homo sapiens OX=9606 GN=RANBP2 PE=1 SV=2	S	C#QNLNPSNK	NA	C#QNLNPSNK	1	NA	1	0.248814	NA	0.329858	2
P53621	1191	COPA	COPA_C1191	COPA_HUMAN Coatomer subunit alpha OS=Homo sapiens OX=9606 GN=COPA PE=1 SV=2	A	C#YSPEFK	NA	C#YSPEFK	1	NA	1	0.251686	NA	0.248787	2
Q9BXW9	729	FANCD2	FANCD2_C729	FACD2_HUMAN Fanconi anemia group D2 protein OS=Homo sapiens OX=9606 GN=FANCD2 PE=1 SV=2	L	C#LAPYFR	NA	C#LAPYFR	1	NA	1	0.252763	NA	0.236732	2
P39687	87	ANP32A	ANP32A_C87	AN32A_HUMAN Acidic leucine-rich nuclear phosphoprotein 32 family member A OS=Homo sapiens OX=9606 GN=ANP32A PE=1 SV=1	K	C#PNLTHL	NA	C#PNLTHL	1	NA	2	0.267634	NA	0.0974051	2
P54577	250	YARS	YARS_C250	SYYC_HUMAN Tyrosine--tRNA ligase, cytoplasmic OS=Homo sapiens OX=9606 GN=YARS PE=1 SV=4	F	C#EPGNVENNGVL	NA	C#EPGNVENNGVLSFIK	1	NA	2	0.267836	NA	0.0448699	2
Q9GZS1	14	POLR1E	POLR1E_C14	RPA49_HUMAN DNA-directed RNA polymerase I subunit RPA49 OS=Homo sapiens OX=9606 GN=POLR1E PE=1 SV=3	Y	C#GAPDGSQR	NA	C#GAPDGSQR	1	NA	1	0.268827	NA	0.305099	2
Q13322	223	GRB10	GRB10_C223	GRB10_HUMAN Growth factor receptor-bound protein 10 OS=Homo sapiens OX=9606 GN=GRB10 PE=1 SV=2	R	C#LEDHELVVQ	NA	C#LEDHELVVQ	1	NA	1	0.269312	NA	0.0732232	2
Q8WX92	23	NELFB	NELFB_C23	NELFB_HUMAN Negative elongation factor B OS=Homo sapiens OX=9606 GN=NELFB PE=1 SV=1	N	C#TEPLK	NA	C#TEPLK	1	NA	1	0.269527	NA	0.178829	2
Q9Y450	491	HBS1L	HBS1L_C491	HBS1L_HUMAN HBS1-like protein OS=Homo sapiens OX=9606 GN=HBS1L PE=1 SV=1	L	C#VSDVFK	NA	C#VSDVFK	1	NA	1	0.272156	NA	0.150442	2
Q92600	252	CNOT9	CNOT9_C252	CNOT9_HUMAN CCR4-NOT transcription complex subunit 9 OS=Homo sapiens OX=9606 GN=CNOT9 PE=1 SV=1	Q	C#LPDQLK	NA	C#LPDQLK	1	NA	1	0.274457	NA	0.157752	2
Q9P246	15	STIM2	STIM2_C15	STIM2_HUMAN Stromal interaction molecule 2 OS=Homo sapiens OX=9606 GN=STIM2 PE=1 SV=2	G	C#ELVPR	NA	C#ELVPR	2	NA	1	0.30681	NA	0.357639	2
Q5T7W7	355	TSTD2	TSTD2_C355	TSTD2_HUMAN Thiosulfate sulfurtransferase/rhodanese-like domain-containing protein 2 OS=Homo sapiens OX=9606 GN=TSTD2 PE=1 SV=1	Y	C#TGGIR	NA	C#TGGIR	1	NA	1	0.281773	NA	0.153849	2
O15371	19	EIF3D	EIF3D_C19	EIF3D_HUMAN Eukaryotic translation initiation factor 3 subunit D OS=Homo sapiens OX=9606 GN=EIF3D PE=1 SV=1	P	C#AVPEQFR	C#AVPEQFR	NA	1	1	NA	0.284306	0.16756	NA	2
Q9Y281	39	CFL2	CFL2_C39	COF2_HUMAN Cofilin-2 OS=Homo sapiens OX=9606 GN=CFL2 PE=1 SV=1	F	C#LSDDKR	NA	C#LSDDKR	1	NA	2	0.285713	NA	0.102982	2
Q969V6	509	MRTFA	MRTFA_C509	MRTFA_HUMAN Myocardin-related transcription factor A OS=Homo sapiens OX=9606 GN=MRTFA PE=1 SV=1	C	C#LSPGGR	C#LSPGGR	NA	1	1	NA	0.293928	0.235399	NA	2
P62241	100	RPS8	RPS8_C100	RS8_HUMAN 40S ribosomal protein S8 OS=Homo sapiens OX=9606 GN=RPS8 PE=1 SV=2	N	C#IVLIDSTPYR	NA	C#IVLIDSTPYR	1	NA	2	0.296362	NA	0.131017	2
O60287	849	URB1	URB1_C849	NPA1P_HUMAN Nucleolar pre-ribosomal-associated protein 1 OS=Homo sapiens OX=9606 GN=URB1 PE=1 SV=4	C	C#QQLSR	C#QQLSR	NA	1	1	NA	0.305493	0.146877	NA	2
P78527	1432	PRKDC	PRKDC_C1432	PRKDC_HUMAN DNA-dependent protein kinase catalytic subunit OS=Homo sapiens OX=9606 GN=PRKDC PE=1 SV=3	L	C#AVNLYGPDAQVDR	NA	C#AVNLYGPDAQVDR	1	NA	1	0.306167	NA	0.0110128	2
P15880	222	RPS2	RPS2_C222	RS2_HUMAN 40S ribosomal protein S2 OS=Homo sapiens OX=9606 GN=RPS2 PE=1 SV=2	D	C#YTSAR	NA	C#YTSAR	1	NA	1	0.306664	NA	0.180795	2
O75643	1278	SNRNP200	SNRNP200_C1278	U520_HUMAN U5 small nuclear ribonucleoprotein 200 kDa helicase OS=Homo sapiens OX=9606 GN=SNRNP200 PE=1 SV=2	S	C#ETQLPVSFR	NA	C#ETQLPVSFR	1	NA	1	0.314206	NA	0.00497086	2
Q96G46	315	DUS3L	DUS3L_C315	DUS3L_HUMAN tRNA-dihydrouridine(47) synthase [NAD(P)(+)]-like OS=Homo sapiens OX=9606 GN=DUS3L PE=1 SV=2	T	C#GNLPFR	C#GNLPFR	NA	1	1	NA	0.315555	0.184901	NA	2
Q14690	361	PDCD11	PDCD11_C361	RRP5_HUMAN Protein RRP5 homolog OS=Homo sapiens OX=9606 GN=PDCD11 PE=1 SV=3	S	C#QNLGAVL	C#QNLGAVL	NA	1	1	NA	0.316445	0.125002	NA	2
Q15427	168	SF3B4	SF3B4_C168	SF3B4_HUMAN Splicing factor 3B subunit 4 OS=Homo sapiens OX=9606 GN=SF3B4 PE=1 SV=1	L	C#NRPITVS	C#NRPITVSY	NA	1	1	NA	0.326067	0.342566	NA	2
Q86UP2	303	KTN1	KTN1_C303	KTN1_HUMAN Kinectin OS=Homo sapiens OX=9606 GN=KTN1 PE=1 SV=1	L	C#VVDLLK	NA	C#VVDLLK	1	NA	1	0.331785	NA	0.116115	2
Q9NRH3	138	TUBG2	TUBG2_C138	TBG2_HUMAN Tubulin gamma-2 chain OS=Homo sapiens OX=9606 GN=TUBG2 PE=2 SV=1	L	C#HSIAGGTGSGL	NA	C#HSIAGGTGS	1	NA	1	0.333176	NA	0.203756	2
P31930	316	UQCRC1	UQCRC1_C316	QCR1_HUMAN Cytochrome b-c1 complex subunit 1, mitochondrial OS=Homo sapiens OX=9606 GN=UQCRC1 PE=1 SV=3	D	C#TYGGGVHL	NA	C#TYGGGVHLS C#TYGGGVH	1	NA	2	0.339019	NA	0.368961	2
Q8NAV1	158	PRPF38A	PRPF38A_C158	PR38A_HUMAN Pre-mRNA-splicing factor 38A OS=Homo sapiens OX=9606 GN=PRPF38A PE=1 SV=1	V	C#DIILPR	C#DIILPR	NA	1	1	NA	0.343602	0.100385	NA	2
Q9BSD7	110	NTPCR	NTPCR_C110	NTPCR_HUMAN Cancer-related nucleoside-triphosphatase OS=Homo sapiens OX=9606 GN=NTPCR PE=1 SV=1	V	C#VIDEIGK	C#VIDEIGK	NA	1	1	NA	0.34972	0.0848557	NA	2
Q9UPT9	494	USP22	USP22_C494	UBP22_HUMAN Ubiquitin carboxyl-terminal hydrolase 22 OS=Homo sapiens OX=9606 GN=USP22 PE=1 SV=2	K	C#DDAIITK	NA	C#DDAIITK	1	NA	1	0.350393	NA	0.248563	2
Q9BY32	57	ITPA	ITPA_C57	ITPA_HUMAN Inosine triphosphate pyrophosphatase OS=Homo sapiens OX=9606 GN=ITPA PE=1 SV=2	K	C#QEAVR	NA	C#QEAVR	1	NA	1	0.361798	NA	0.0925752	2
O43572	475	AKAP10	AKAP10_C475	AKA10_HUMAN A-kinase anchor protein 10, mitochondrial OS=Homo sapiens OX=9606 GN=AKAP10 PE=1 SV=2	N	C#FTTPLR	NA	C#FTTPLR	1	NA	1	0.364373	NA	0.156534	2
Q9H9B4	284	SFXN1	SFXN1_C284	SFXN1_HUMAN Sideroflexin-1 OS=Homo sapiens OX=9606 GN=SFXN1 PE=1 SV=4	C	C#ALFPQK	NA	C#ALFPQK	1	NA	1	0.371218	NA	0.0845936	2
Q01780	555	EXOSC10	EXOSC10_C555	EXOSX_HUMAN Exosome component 10 OS=Homo sapiens OX=9606 GN=EXOSC10 PE=1 SV=2	C	C#NPVPPLVR	NA	C#NPVPPLVR	1	NA	2	0.371398	NA	0.210792	2
Q8TDX7	274	NEK7	NEK7_C274	NEK7_HUMAN Serine/threonine-protein kinase Nek7 OS=Homo sapiens OX=9606 GN=NEK7 PE=1 SV=1	M	C#INPDPEK	C#INPDPEK	NA	1	1	NA	0.376519	0.102886	NA	2
Q9BTD8	385	RBM42	RBM42_C385	RBM42_HUMAN RNA-binding protein 42 OS=Homo sapiens OX=9606 GN=RBM42 PE=1 SV=1	F	NA	C#GDLGNEVNDDILAR	C#GDLGNEVNDDILAR	NA	1	2	NA	0.000142154	0.00742372	2
O75369	769	FLNB	FLNB_C769	FLNB_HUMAN Filamin-B OS=Homo sapiens OX=9606 GN=FLNB PE=1 SV=2	D	NA	C#TEAGEGDVSVGIK	C#TEAGEGDVSVGIK	NA	1	1	NA	0.00104843	5.91e-05	2
Q14839	1594	CHD4	CHD4_C1594	CHD4_HUMAN Chromodomain-helicase-DNA-binding protein 4 OS=Homo sapiens OX=9606 GN=CHD4 PE=1 SV=2	E	NA	C#TQAPAPASEDEK	C#TQAPAPASEDEK	NA	1	1	NA	0.00162848	0.000489704	2
P60981	135	DSTN	DSTN_C135	DEST_HUMAN Destrin OS=Homo sapiens OX=9606 GN=DSTN PE=1 SV=3	E	NA	C#QANGPEDLNR	C#QANGPEDLNR C#QANGPEDLNRA	NA	1	3	NA	0.00256216	0.0213735	2
Q9NVN8	213	GNL3L	GNL3L_C213	GNL3L_HUMAN Guanine nucleotide-binding protein-like 3-like protein OS=Homo sapiens OX=9606 GN=GNL3L PE=1 SV=1	R	NA	C#SVPVDQASESLLK	C#SVPVDQASESLLK	NA	1	1	NA	0.00270639	0.000829714	2
O75534	53	CSDE1	CSDE1_C53	CSDE1_HUMAN Cold shock domain-containing protein E1 OS=Homo sapiens OX=9606 GN=CSDE1 PE=1 SV=2	H	NA	C#SQYNGNLQDLK	C#SQYNGNLQDLK	NA	1	1	NA	0.00291348	0.0068401	2
P05388	119	RPLP0	RPLP0_C119	RLA0_HUMAN 60S acidic ribosomal protein P0 OS=Homo sapiens OX=9606 GN=RPLP0 PE=1 SV=1	P	NA	C#EVTVPAQNTGLGPEK	C#EVTVPAQNTGLGPEK	NA	1	2	NA	0.00331383	0.00364925	2
P52815	45	MRPL12	MRPL12_C45	RM12_HUMAN 39S ribosomal protein L12, mitochondrial OS=Homo sapiens OX=9606 GN=MRPL12 PE=1 SV=2	R	NA	C#EALAGAPLDNAPK	C#EALAGAPLDNAPK	NA	1	1	NA	0.00364873	0.000589545	2
Q9Y6K0	11	CEPT1	CEPT1_C11	CEPT1_HUMAN Choline/ethanolaminephosphotransferase 1 OS=Homo sapiens OX=9606 GN=CEPT1 PE=1 SV=1	R	NA	C#GDSHPESPVGF	C#GDSHPESPVGFGHM C#GDSHPESPVGFGH C#GDSHPESPVGF	NA	1	5	NA	0.00384392	0.0284789	2
P14868	130	DARS	DARS_C130	SYDC_HUMAN Aspartate--tRNA ligase, cytoplasmic OS=Homo sapiens OX=9606 GN=DARS PE=1 SV=2	S	NA	C#TQQDVELHVQ	C#TQQDVELHVQK C#TQQDVELHVQ	NA	1	3	NA	0.00460196	0.000646	2
Q8NF37	514	LPCAT1	LPCAT1_C514	PCAT1_HUMAN Lysophosphatidylcholine acyltransferase 1 OS=Homo sapiens OX=9606 GN=LPCAT1 PE=1 SV=2	F	NA	C#ADFSPENSDAGR	C#ADFSPENSDAGR	NA	1	1	NA	0.0047398	0.0143711	2
Q9H2U2	290	PPA2	PPA2_C290	IPYR2_HUMAN Inorganic pyrophosphatase 2, mitochondrial OS=Homo sapiens OX=9606 GN=PPA2 PE=1 SV=2	N	NA	C#TNVQISDSPFR	C#TNVQISDSPFR	NA	1	1	NA	0.00479564	0.00223018	2
Q9H7S9	399	ZNF703	ZNF703_C399	ZN703_HUMAN Zinc finger protein 703 OS=Homo sapiens OX=9606 GN=ZNF703 PE=1 SV=1	T	NA	C#SAHDPAGPSLK	C#SAHDPAGPSLK	NA	1	2	NA	0.00486191	0.0293047	2
Q14318	274	FKBP8	FKBP8_C274	FKBP8_HUMAN Peptidyl-prolyl cis-trans isomerase FKBP8 OS=Homo sapiens OX=9606 GN=FKBP8 PE=1 SV=2	K	NA	C#LNNLAASQLK	C#LNNLAASQLK	NA	1	1	NA	0.00486443	0.00596621	2
Q9UQ35	872	SRRM2	SRRM2_C872	SRRM2_HUMAN Serine/arginine repetitive matrix protein 2 OS=Homo sapiens OX=9606 GN=SRRM2 PE=1 SV=2	S	NA	C#FESSPDPELK	C#FESSPDPELK	NA	1	1	NA	0.00491298	0.00514987	2
Q5H9R7	844	PPP6R3	PPP6R3_C844	PP6R3_HUMAN Serine/threonine-protein phosphatase 6 regulatory subunit 3 OS=Homo sapiens OX=9606 GN=PPP6R3 PE=1 SV=2	K	NA	C#AAPRPPSSSPEQR	C#AAPRPPSSSPEQR	NA	1	8	NA	0.00498835	0.0827004	2
Q9H3P2	471	NELFA	NELFA_C471	NELFA_HUMAN Negative elongation factor A OS=Homo sapiens OX=9606 GN=NELFA PE=1 SV=3	P	NA	C#QEQGDVIQIK	C#QEQGDVIQIK	NA	1	1	NA	0.00524282	0.000613713	2
Q99832	345	CCT7	CCT7_C345	TCPH_HUMAN T-complex protein 1 subunit eta OS=Homo sapiens OX=9606 GN=CCT7 PE=1 SV=2	R	NA	C#QVFEETQIGGER	C#QVFEETQIGGER	NA	1	2	NA	0.00580993	0.0116719	2
Q14166	270	TTLL12	TTLL12_C270	TTL12_HUMAN Tubulin--tyrosine ligase-like protein 12 OS=Homo sapiens OX=9606 GN=TTLL12 PE=1 SV=2	S	NA	C#TPEPPAEHY	C#TPEPPAEHY	NA	1	1	NA	0.00594814	0.0320554	2
Q8TAF3	350	WDR48	WDR48_C350	WDR48_HUMAN WD repeat-containing protein 48 OS=Homo sapiens OX=9606 GN=WDR48 PE=1 SV=1	L	NA	C#TQPDQVIK	C#TQPDQVIK	NA	1	1	NA	0.00629885	0.00261149	2
Q9BQ52	136	ELAC2	ELAC2_C136	RNZ2_HUMAN Zinc phosphodiesterase ELAC protein 2 OS=Homo sapiens OX=9606 GN=ELAC2 PE=1 SV=2	K	NA	C#VLSGPPQLEK	C#VLSGPPQLEK	NA	1	1	NA	0.00662216	0.00710102	2
O60942	546	RNGTT	RNGTT_C546	MCE1_HUMAN mRNA-capping enzyme OS=Homo sapiens OX=9606 GN=RNGTT PE=1 SV=1	V	NA	C#NSISNPVTK	C#NSISNPVTK	NA	1	1	NA	0.00680141	0.00441238	2
Q99832	450	CCT7	CCT7_C450	TCPH_HUMAN T-complex protein 1 subunit eta OS=Homo sapiens OX=9606 GN=CCT7 PE=1 SV=2	L	NA	C#DNAGFDATNILNK C#DNAGFDAT	C#DNAGFDATNILNK	NA	2	1	NA	0.156656	0.000198687	2
Q9UKV3	1083	ACIN1	ACIN1_C1083	ACINU_HUMAN Apoptotic chromatin condensation inducer in the nucleus OS=Homo sapiens OX=9606 GN=ACIN1 PE=1 SV=2	L	NA	C#ADYAEQDELDYHR	C#ADYAEQDELDYHR	NA	1	2	NA	0.00779598	0.00246068	2
Q9BUK6	232	MSTO1	MSTO1_C232	MSTO1_HUMAN Protein misato homolog 1 OS=Homo sapiens OX=9606 GN=MSTO1 PE=1 SV=1	L	NA	C#DLHDGFSGVGAK	C#DLHDGFSGVGAK	NA	1	2	NA	0.00868952	0.0732235	2
Q00839	453	HNRNPU	HNRNPU_C453	HNRPU_HUMAN Heterogeneous nuclear ribonucleoprotein U OS=Homo sapiens OX=9606 GN=HNRNPU PE=1 SV=6	N	NA	C#AVEFNFGQK	C#AVEFNFGQK	NA	1	1	NA	0.00927311	0.00169124	2
P18754	198	RCC1	RCC1_C198	RCC1_HUMAN Regulator of chromosome condensation OS=Homo sapiens OX=9606 GN=RCC1 PE=1 SV=1	G	NA	C#GEQGQLGR	C#GEQGQLGR	NA	1	1	NA	0.0365377	0.00319053	2
O95757	540	HSPA4L	HSPA4L_C540	HS74L_HUMAN Heat shock 70 kDa protein 4L OS=Homo sapiens OX=9606 GN=HSPA4L PE=1 SV=3	K	NA	C#HAEHTPEEEIDHTGAK	C#HAEHTPEEEIDHTGAK	NA	1	3	NA	0.010189	0.000479805	2
Q9Y5K5	100	UCHL5	UCHL5_C100	UCHL5_HUMAN Ubiquitin carboxyl-terminal hydrolase isozyme L5 OS=Homo sapiens OX=9606 GN=UCHL5 PE=1 SV=3	N	NA	C#THQDVHLGETL	C#THQDVHLGETL	NA	2	2	NA	0.0268766	0.0280839	2
Q9BTE3	108	MCMBP	MCMBP_C108	MCMBP_HUMAN Mini-chromosome maintenance complex-binding protein OS=Homo sapiens OX=9606 GN=MCMBP PE=1 SV=2	E	NA	C#GPQQELDLNSPR	C#GPQQELDLNSPR	NA	1	2	NA	0.0110627	0.00151719	2
Q14974	585	KPNB1	KPNB1_C585	IMB1_HUMAN Importin subunit beta-1 OS=Homo sapiens OX=9606 GN=KPNB1 PE=1 SV=2	L	NA	C#ATLQNVLR	C#ATLQNVLR	NA	1	1	NA	0.01128	0.0154601	2
Q9UGV2	290	NDRG3	NDRG3_C290	NDRG3_HUMAN Protein NDRG3 OS=Homo sapiens OX=9606 GN=NDRG3 PE=1 SV=2	D	NA	C#GGLPQVVQPGK	C#GGLPQVVQPGK	NA	1	2	NA	0.0113248	0.0202343	2
P38919	140	EIF4A3	EIF4A3_C140	IF4A3_HUMAN Eukaryotic initiation factor 4A-III OS=Homo sapiens OX=9606 GN=EIF4A3 PE=1 SV=4	A	NA	C#IGGTNVGEDIR	C#IGGTNVGEDIRK	NA	1	1	NA	0.0127737	0.0869434	2
Q99460	112	PSMD1	PSMD1_C112	PSMD1_HUMAN 26S proteasome non-ATPase regulatory subunit 1 OS=Homo sapiens OX=9606 GN=PSMD1 PE=1 SV=2	Q	NA	C#VENADLPEGEK	C#VENADLPEGEK	NA	1	1	NA	0.0135234	0.0169334	2
P21266	178	GSTM3	GSTM3_C178	GSTM3_HUMAN Glutathione S-transferase Mu 3 OS=Homo sapiens OX=9606 GN=GSTM3 PE=1 SV=3	K	NA	C#LDEFPNLK	C#LDEFPNLK	NA	1	1	NA	0.0144695	0.00616747	2
P78527	2880	PRKDC	PRKDC_C2880	PRKDC_HUMAN DNA-dependent protein kinase catalytic subunit OS=Homo sapiens OX=9606 GN=PRKDC PE=1 SV=3	G	NA	C#LASLQQPVGIR	C#LASLQQPVGIR	NA	1	1	NA	0.0145659	0.0332017	2
Q96KM6	58	ZNF512B	ZNF512B_C58	Z512B_HUMAN Zinc finger protein 512B OS=Homo sapiens OX=9606 GN=ZNF512B PE=1 SV=1	L	NA	C#FDPGSPASDK	C#FDPGSPASDK	NA	1	1	NA	0.0148629	0.011042	2
Q9Y6M7	993	SLC4A7	SLC4A7_C993	S4A7_HUMAN Sodium bicarbonate cotransporter 3 OS=Homo sapiens OX=9606 GN=SLC4A7 PE=1 SV=2	E	NA	C#SAPGEQPK	C#SAPGEQPK	NA	1	1	NA	0.015013	0.15288	2
Q8WZ82	41	OVCA2	OVCA2_C41	OVCA2_HUMAN Esterase OVCA2 OS=Homo sapiens OX=9606 GN=OVCA2 PE=1 SV=1	V	NA	C#LSGPHPVPDPPGPEGAR	C#LSGPHPVPDPPGPEGAR	NA	1	1	NA	0.0157342	0.0373423	2
Q8WY36	229	BBX	BBX_C229	BBX_HUMAN HMG box transcription factor BBX OS=Homo sapiens OX=9606 GN=BBX PE=1 SV=1	T	NA	C#RPDVSESPELR	C#RPDVSESPELR	NA	1	2	NA	0.0165816	0.00419723	2
Q9Y606	125	PUS1	PUS1_C125	TRUA_HUMAN tRNA pseudouridine synthase A OS=Homo sapiens OX=9606 GN=PUS1 PE=1 SV=3	G	NA	C#IPENHGEDMR	C#IPENHGEDMR	NA	2	1	NA	0.17681	0.00492512	2
O15042	65	U2SURP	U2SURP_C65	SR140_HUMAN U2 snRNP-associated SURP motif-containing protein OS=Homo sapiens OX=9606 GN=U2SURP PE=1 SV=2	L	NA	C#DSPHQNLSR	C#DSPHQNLSR	NA	1	1	NA	0.0186075	0.0069634	2
Q9UHI6	98	DDX20	DDX20_C98	DDX20_HUMAN Probable ATP-dependent RNA helicase DDX20 OS=Homo sapiens OX=9606 GN=DDX20 PE=1 SV=2	R	NA	C#GLDLIVQAK	C#GLDLIVQAK	NA	1	2	NA	0.018721	0.143043	2
Q5JRA6	1486	MIA3	MIA3_C1486	TGO1_HUMAN Transport and Golgi organization protein 1 homolog OS=Homo sapiens OX=9606 GN=MIA3 PE=1 SV=1	K	NA	C#NLEDQVK	C#NLEDQVK	NA	1	1	NA	0.0188005	0.0104846	2
Q8NEW0	330	SLC30A7	SLC30A7_C330	ZNT7_HUMAN Zinc transporter 7 OS=Homo sapiens OX=9606 GN=SLC30A7 PE=2 SV=1	L	NA	C#SDVYVGTLK	C#SDVYVGTLK	NA	1	1	NA	0.0191787	0.0960374	2
P62316	63	SNRPD2	SNRPD2_C63	SMD2_HUMAN Small nuclear ribonucleoprotein Sm D2 OS=Homo sapiens OX=9606 GN=SNRPD2 PE=1 SV=1	H	NA	C#NMVLENVK	C#NMVLENVK	NA	1	1	NA	0.0199001	0.000360705	2
Q15233	145	NONO	NONO_C145	NONO_HUMAN Non-POU domain-containing octamer-binding protein OS=Homo sapiens OX=9606 GN=NONO PE=1 SV=4	A	NA	C#HSASLTVR	C#HSASLTVR	NA	1	2	NA	0.0199194	0.0459874	2
Q01081	102	U2AF1	U2AF1_C102	U2AF1_HUMAN Splicing factor U2AF 35 kDa subunit OS=Homo sapiens OX=9606 GN=U2AF1 PE=1 SV=3	V	NA	C#DNLGDHLVGN	C#DNLGDHLVGN	NA	1	1	NA	0.0217371	0.0613712	2
Q9Y6M5	469	SLC30A1	SLC30A1_C469	ZNT1_HUMAN Zinc transporter 1 OS=Homo sapiens OX=9606 GN=SLC30A1 PE=1 SV=3	S	NA	C#LELSNNLEK	C#LELSNNLEK	NA	1	1	NA	0.0222363	0.00208111	2
Q6UB35	198	MTHFD1L	MTHFD1L_C198	C1TM_HUMAN Monofunctional C1-tetrahydrofolate synthase, mitochondrial OS=Homo sapiens OX=9606 GN=MTHFD1L PE=1 SV=1	E	NA	C#FVSPVAK	C#FVSPVAK	NA	1	1	NA	0.0229581	0.0339214	2
Q8IXT5	204	RBM12B	RBM12B_C204	RB12B_HUMAN RNA-binding protein 12B OS=Homo sapiens OX=9606 GN=RBM12B PE=1 SV=2	S	NA	C#VDASGGLK	C#VDASGGLK	NA	1	1	NA	0.023646	0.0281717	2
P41214	528	EIF2D	EIF2D_C528	EIF2D_HUMAN Eukaryotic translation initiation factor 2D OS=Homo sapiens OX=9606 GN=EIF2D PE=1 SV=3	R	NA	C#QASTTVNPAPGAK	C#QASTTVNPAPGAK	NA	1	2	NA	0.0244283	0.0405149	2
O95573	652	ACSL3	ACSL3_C652	ACSL3_HUMAN Long-chain-fatty-acid--CoA ligase 3 OS=Homo sapiens OX=9606 GN=ACSL3 PE=1 SV=3	S	NA	C#EMENEVLK	C#EMENEVLK	NA	1	2	NA	0.02552	0.101095	2
Q92575	186	UBXN4	UBXN4_C186	UBXN4_HUMAN UBX domain-containing protein 4 OS=Homo sapiens OX=9606 GN=UBXN4 PE=1 SV=2	G	NA	C#SDQRPAEDLNIR	C#SDQRPAEDLNIR	NA	1	2	NA	0.025715	0.0454259	2
Q9BQ52	609	ELAC2	ELAC2_C609	RNZ2_HUMAN Zinc phosphodiesterase ELAC protein 2 OS=Homo sapiens OX=9606 GN=ELAC2 PE=1 SV=2	K	NA	C#LQEGAEIS	C#LQEGAEISSPAVER	NA	1	2	NA	0.0258675	0.00228932	2
P10809	447	HSPD1	HSPD1_C447	CH60_HUMAN 60 kDa heat shock protein, mitochondrial OS=Homo sapiens OX=9606 GN=HSPD1 PE=1 SV=2	R	NA	C#IPALDSLTPANEDQK	C#IPALDSLTPANEDQK	NA	3	1	NA	0.0331186	0.126473	2
Q99832	29	CCT7	CCT7_C29	TCPH_HUMAN T-complex protein 1 subunit eta OS=Homo sapiens OX=9606 GN=CCT7 PE=1 SV=2	A	NA	C#QVIAEAVR	C#QVIAEAVR	NA	1	1	NA	0.029302	0.0204066	2
P41091	105	EIF2S3	EIF2S3_C105	IF2G_HUMAN Eukaryotic translation initiation factor 2 subunit 3 OS=Homo sapiens OX=9606 GN=EIF2S3 PE=1 SV=3	S	NA	C#GSSTPDEFPTDIPGTK	C#GSSTPDEFPTDIPGTK	NA	1	2	NA	0.0295964	0.00312323	2
Q96F86	14	EDC3	EDC3_C14	EDC3_HUMAN Enhancer of mRNA-decapping protein 3 OS=Homo sapiens OX=9606 GN=EDC3 PE=1 SV=1	N	NA	C#GDSLGVYQGR	C#GDSLGVYQGR	NA	1	1	NA	0.0307122	0.00111582	2
Q8NC60	150	NOA1	NOA1_C150	NOA1_HUMAN Nitric oxide-associated protein 1 OS=Homo sapiens OX=9606 GN=NOA1 PE=1 SV=2	H	NA	C#QDAGVPGYLPR	C#QDAGVPGYLPR	NA	1	1	NA	0.0316459	0.0693337	2
Q9UKN8	788	GTF3C4	GTF3C4_C788	TF3C4_HUMAN General transcription factor 3C polypeptide 4 OS=Homo sapiens OX=9606 GN=GTF3C4 PE=1 SV=2	R	NA	C#LLHDSIAR	C#LLHDSIAR	NA	2	1	NA	0.0467805	0.10166	2
P53350	67	PLK1	PLK1_C67	PLK1_HUMAN Serine/threonine-protein kinase PLK1 OS=Homo sapiens OX=9606 GN=PLK1 PE=1 SV=1	K	NA	C#FEISDADTK	C#FEISDADTK	NA	1	1	NA	0.0340445	0.00469734	2
Q8NFF5	561	FLAD1	FLAD1_C561	FAD1_HUMAN FAD synthase OS=Homo sapiens OX=9606 GN=FLAD1 PE=1 SV=1	K	NA	C#LSPGGHPTYRPA	C#LSPGGHPTYRPA	NA	1	1	NA	0.0349194	0.0173816	2
O75410	78	TACC1	TACC1_C78	TACC1_HUMAN Transforming acidic coiled-coil-containing protein 1 OS=Homo sapiens OX=9606 GN=TACC1 PE=1 SV=2	S	NA	C#DPSLGLAGPGAK	C#DPSLGLAGPGAK	NA	1	1	NA	0.035263	0.00074094	2
P41252	237	IARS	IARS_C237	SYIC_HUMAN Isoleucine--tRNA ligase, cytoplasmic OS=Homo sapiens OX=9606 GN=IARS PE=1 SV=2	V	NA	C#VNPEMQYVK	C#VNPEMQYVK	NA	2	1	NA	0.0578338	0.016696	2
Q9H981	293	ACTR8	ACTR8_C293	ARP8_HUMAN Actin-related protein 8 OS=Homo sapiens OX=9606 GN=ACTR8 PE=1 SV=2	C	NA	C#VEDGVSHR	C#VEDGVSHR	NA	1	1	NA	0.0370059	0.0955792	2
Q9UGV2	359	NDRG3	NDRG3_C359	NDRG3_HUMAN Protein NDRG3 OS=Homo sapiens OX=9606 GN=NDRG3 PE=1 SV=2	S	NA	C#ESPDVLDR	C#ESPDVLDR	NA	1	1	NA	0.037815	0.129892	2
P49736	315	MCM2	MCM2_C315	MCM2_HUMAN DNA replication licensing factor MCM2 OS=Homo sapiens OX=9606 GN=MCM2 PE=1 SV=4	S	NA	C#TGVLPQLSMVK C#TGVLPQLS	C#TGVLPQLSMVK	NA	2	1	NA	0.0571161	0.00264987	2
Q9UBK7	26	RABL2A	RABL2A_C26	RBL2A_HUMAN Rab-like protein 2A OS=Homo sapiens OX=9606 GN=RABL2A PE=1 SV=1	I	NA	C#LGDSAVGK	C#LGDSAVGK	NA	1	1	NA	0.0399319	0.306961	2
Q9BU89	232	DOHH	DOHH_C232	DOHH_HUMAN Deoxyhypusine hydroxylase OS=Homo sapiens OX=9606 GN=DOHH PE=1 SV=1	R	NA	C#TENPMVR	C#TENPMVR	NA	2	3	NA	0.0470668	0.0373308	2
Q9NZL4	348	HSPBP1	HSPBP1_C348	HPBP1_HUMAN Hsp70-binding protein 1 OS=Homo sapiens OX=9606 GN=HSPBP1 PE=1 SV=2	T	NA	C#FSSPADDSMDR	C#FSSPADDSMDR	NA	1	1	NA	0.04171	0.155814	2
O75874	73	IDH1	IDH1_C73	IDHC_HUMAN Isocitrate dehydrogenase [NADP] cytoplasmic OS=Homo sapiens OX=9606 GN=IDH1 PE=1 SV=2	K	NA	C#ATITPDEK	C#ATITPDEK	NA	1	1	NA	0.0431246	0.0326435	2
P12277	283	CKB	CKB_C283	KCRB_HUMAN Creatine kinase B-type OS=Homo sapiens OX=9606 GN=CKB PE=1 SV=1	T	NA	C#PSNLGTGL	C#PSNLGTGLR	NA	1	1	NA	0.0433832	0.00795451	2
Q9NP92	316	MRPS30	MRPS30_C316	RT30_HUMAN 39S ribosomal protein S30, mitochondrial OS=Homo sapiens OX=9606 GN=MRPS30 PE=1 SV=2	N	NA	C#ADQIEVVFR	C#ADQIEVVFR	NA	1	1	NA	0.0438479	0.00794993	2
O43776	511	NARS	NARS_C511	SYNC_HUMAN Asparagine--tRNA ligase, cytoplasmic OS=Homo sapiens OX=9606 GN=NARS PE=1 SV=1	T	NA	C#PHGGYGLGLER	C#PHGGYGLGLER	NA	2	2	NA	0.187685	0.106435	2
Q9NZL4	297	HSPBP1	HSPBP1_C297	HPBP1_HUMAN Hsp70-binding protein 1 OS=Homo sapiens OX=9606 GN=HSPBP1 PE=1 SV=2	L	NA	C#SLVTDFPQGVR	C#SLVTDFPQGVR	NA	1	1	NA	0.0450653	0.00332999	2
Q00341	948	HDLBP	HDLBP_C948	VIGLN_HUMAN Vigilin OS=Homo sapiens OX=9606 GN=HDLBP PE=1 SV=2	R	NA	C#DIIIISGR	C#DIIIISGR	NA	2	2	NA	0.141117	0.0316945	2
P52732	683	KIF11	KIF11_C683	KIF11_HUMAN Kinesin-like protein KIF11 OS=Homo sapiens OX=9606 GN=KIF11 PE=1 SV=2	L	NA	C#NNLHELQEN C#NNLHEL C#NNLHELQ	C#NNLHELQEN	NA	3	1	NA	0.219348	0.0506999	2
Q16822	325	PCK2	PCK2_C325	PCKGM_HUMAN Phosphoenolpyruvate carboxykinase [GTP], mitochondrial OS=Homo sapiens OX=9606 GN=PCK2 PE=1 SV=4	E	NA	C#VGDDIAWMR	C#VGDDIAWMR	NA	1	1	NA	0.0482053	0.0496506	2
Q9BVP2	158	GNL3	GNL3_C158	GNL3_HUMAN Guanine nucleotide-binding protein-like 3 OS=Homo sapiens OX=9606 GN=GNL3 PE=1 SV=2	R	NA	C#PQVEEAIVQ	C#PQVEEAIVQSGQK	NA	1	2	NA	0.0492744	0.00388776	2
O96017	18	CHEK2	CHEK2_C18	CHK2_HUMAN Serine/threonine-protein kinase Chk2 OS=Homo sapiens OX=9606 GN=CHEK2 PE=1 SV=1	A	NA	C#SQPHGSVT C#SQPHGSVTQ	C#SQPHGSVT C#SQPHGSVTQ	NA	2	2	NA	0.0515017	0.0443636	2
Q96QE3	772	ATAD5	ATAD5_C772	ATAD5_HUMAN ATPase family AAA domain-containing protein 5 OS=Homo sapiens OX=9606 GN=ATAD5 PE=1 SV=4	Q	NA	C#LNDVLGK	C#LNDVLGK	NA	1	1	NA	0.05286	0.0443237	2
P49411	127	TUFM	TUFM_C127	EFTU_HUMAN Elongation factor Tu, mitochondrial OS=Homo sapiens OX=9606 GN=TUFM PE=1 SV=2	D	NA	C#PGHADYVK	C#PGHADYVK	NA	1	1	NA	0.05303	0.128659	2
P10155	71	RO60	RO60_C71	RO60_HUMAN 60 kDa SS-A/Ro ribonucleoprotein OS=Homo sapiens OX=9606 GN=RO60 PE=1 SV=2	G	NA	C#EVIQEIK	C#EVIQEIK	NA	2	1	NA	0.0602872	0.010589	2
Q9UBU9	588	NXF1	NXF1_C588	NXF1_HUMAN Nuclear RNA export factor 1 OS=Homo sapiens OX=9606 GN=NXF1 PE=1 SV=1	K	NA	C#LQDNNWDYTR	C#LQDNNWDYTR	NA	1	1	NA	0.0556235	0.00265662	2
P09488	174	GSTM1	GSTM1_C174	GSTM1_HUMAN Glutathione S-transferase Mu 1 OS=Homo sapiens OX=9606 GN=GSTM1 PE=1 SV=3	K	NA	C#LDAFPNLK	C#LDAFPNLK	NA	1	1	NA	0.0572394	0.232427	2
Q9NZD8	204	SPG21	SPG21_C204	SPG21_HUMAN Maspardin OS=Homo sapiens OX=9606 GN=SPG21 PE=1 SV=1	N	NA	C#QNSYVEPHK	C#QNSYVEPHK	NA	2	2	NA	0.0674311	0.00806744	2
P08708	35	RPS17	RPS17_C35	RS17_HUMAN 40S ribosomal protein S17 OS=Homo sapiens OX=9606 GN=RPS17 PE=1 SV=2	V	NA	C#EEIAIIPSK	C#EEIAIIPSK	NA	1	1	NA	0.0595675	0.0248782	2
Q14C86	789	GAPVD1	GAPVD1_C789	GAPD1_HUMAN GTPase-activating protein and VPS9 domain-containing protein 1 OS=Homo sapiens OX=9606 GN=GAPVD1 PE=1 SV=2	E	NA	C#SSDFGGK	C#SSDFGGK	NA	1	1	NA	0.0606294	0.222021	2
P36776	520	LONP1	LONP1_C520	LONM_HUMAN Lon protease homolog, mitochondrial OS=Homo sapiens OX=9606 GN=LONP1 PE=1 SV=2	L	NA	C#FYGPPGVGK	C#FYGPPGVGK	NA	1	1	NA	0.0615662	0.0226253	2
Q8IZ69	225	TRMT2A	TRMT2A_C225	TRM2A_HUMAN tRNA (uracil-5-)-methyltransferase homolog A OS=Homo sapiens OX=9606 GN=TRMT2A PE=1 SV=2	C	NA	C#PLEGVRPSPQ	C#PLEGVRPSPQ	NA	1	1	NA	0.061941	0.252538	2
P83731	36	RPL24	RPL24_C36	RL24_HUMAN 60S ribosomal protein L24 OS=Homo sapiens OX=9606 GN=RPL24 PE=1 SV=1	K	NA	C#ESAFLSK	C#ESAFLSK	NA	1	1	NA	0.0646477	0.00868565	2
Q9BWH6	185	RPAP1	RPAP1_C185	RPAP1_HUMAN RNA polymerase II-associated protein 1 OS=Homo sapiens OX=9606 GN=RPAP1 PE=1 SV=3	T	NA	C#ETPTPR	C#ETPTPR	NA	2	2	NA	0.113469	0.064363	2
Q92621	925	NUP205	NUP205_C925	NU205_HUMAN Nuclear pore complex protein Nup205 OS=Homo sapiens OX=9606 GN=NUP205 PE=1 SV=3	S	NA	C#NSNIQIK	C#NSNIQIK	NA	1	1	NA	0.0669877	0.173255	2
Q8NCN4	337	RNF169	RNF169_C337	RN169_HUMAN E3 ubiquitin-protein ligase RNF169 OS=Homo sapiens OX=9606 GN=RNF169 PE=1 SV=2	R	NA	C#VSAPDLTIEK	C#VSAPDLTIEK	NA	1	2	NA	0.0672005	0.0357502	2
Q96PK6	90	RBM14	RBM14_C90	RBM14_HUMAN RNA-binding protein 14 OS=Homo sapiens OX=9606 GN=RBM14 PE=1 SV=2	A	NA	C#TSQELR	C#TSQELR	NA	1	1	NA	0.0691391	0.0446647	2
Q4J6C6	569	PREPL	PREPL_C569	PPCEL_HUMAN Prolyl endopeptidase-like OS=Homo sapiens OX=9606 GN=PREPL PE=1 SV=1	L	NA	C#NSNPELVR	C#NSNPELVR	NA	1	1	NA	0.0692337	0.126164	2
Q9BUF5	12	TUBB6	TUBB6_C12	TBB6_HUMAN Tubulin beta-6 chain OS=Homo sapiens OX=9606 GN=TUBB6 PE=1 SV=1	Q	NA	C#GNQIGTK	C#GNQIGTK	NA	1	1	NA	0.0701277	0.195164	2
Q92616	2558	GCN1	GCN1_C2558	GCN1_HUMAN eIF-2-alpha kinase activator GCN1 OS=Homo sapiens OX=9606 GN=GCN1 PE=1 SV=6	K	NA	C#LQNPSSDIR	C#LQNPSSDIR	NA	2	2	NA	0.0920469	0.0115245	2
Q7KZF4	826	SND1	SND1_C826	SND1_HUMAN Staphylococcal nuclease domain-containing protein 1 OS=Homo sapiens OX=9606 GN=SND1 PE=1 SV=1	Q	NA	C#LLNVEHL	C#LLNVEHL	NA	1	1	NA	0.0707852	0.0508199	2
Q8TB69	20	ZNF519	ZNF519_C20	ZN519_HUMAN Zinc finger protein 519 OS=Homo sapiens OX=9606 GN=ZNF519 PE=2 SV=2	K	NA	C#LDPAQQNLYR	C#LDPAQQNLYR	NA	1	1	NA	0.0712258	0.192666	2
Q16222	251	UAP1	UAP1_C251	UAP1_HUMAN UDP-N-acetylhexosamine pyrophosphorylase OS=Homo sapiens OX=9606 GN=UAP1 PE=1 SV=3	Y	NA	C#VDNILVK	C#VDNILVK	NA	1	2	NA	0.0721181	0.104859	2
Q8TAE6	136	PPP1R14C	PPP1R14C_C136	PP14C_HUMAN Protein phosphatase 1 regulatory subunit 14C OS=Homo sapiens OX=9606 GN=PPP1R14C PE=1 SV=3	D	NA	C#YKPTEEFIK	C#YKPTEEFIK	NA	2	1	NA	0.21864	0.183458	2
O43264	404	ZW10	ZW10_C404	ZW10_HUMAN Centromere/kinetochore protein zw10 homolog OS=Homo sapiens OX=9606 GN=ZW10 PE=1 SV=3	K	NA	C#QDVIVAAR	C#QDVIVAAR	NA	2	1	NA	0.0841453	0.00518963	2
P51553	81	IDH3G	IDH3G_C81	IDH3G_HUMAN Isocitrate dehydrogenase [NAD] subunit gamma, mitochondrial OS=Homo sapiens OX=9606 GN=IDH3G PE=1 SV=1	A	NA	C#VPVDFEEVHVS	C#VPVDFEEVHVS	NA	1	1	NA	0.0764506	0.0346631	2
Q9Y6N7	1588	ROBO1	ROBO1_C1588	ROBO1_HUMAN Roundabout homolog 1 OS=Homo sapiens OX=9606 GN=ROBO1 PE=1 SV=1	Y	NA	C#RPTFPTSNNPR	C#RPTFPTSNNPR	NA	1	1	NA	0.0771119	0.030197	2
O00273	154	DFFA	DFFA_C154	DFFA_HUMAN DNA fragmentation factor subunit alpha OS=Homo sapiens OX=9606 GN=DFFA PE=1 SV=1	P	NA	C#SDLAQELR	C#SDLAQELR	NA	1	1	NA	0.0774542	0.00310553	2
Q99615	105	DNAJC7	DNAJC7_C105	DNJC7_HUMAN DnaJ homolog subfamily C member 7 OS=Homo sapiens OX=9606 GN=DNAJC7 PE=1 SV=2	K	NA	C#HLSLGNAM	C#HLSLGNAM C#HLSLGN C#HLSLGNAMAA	NA	1	5	NA	0.0776753	0.155508	2
O00273	47	DFFA	DFFA_C47	DFFA_HUMAN DNA fragmentation factor subunit alpha OS=Homo sapiens OX=9606 GN=DFFA PE=1 SV=1	A	NA	C#DILAIDK	C#DILAIDK	NA	2	1	NA	0.197812	0.0542852	2
Q5TGZ0	13	MICOS10	MICOS10_C13	MIC10_HUMAN MICOS complex subunit MIC10 OS=Homo sapiens OX=9606 GN=MICOS10 PE=1 SV=1	R	NA	C#LADAVVK	C#LADAVVK	NA	1	1	NA	0.0784056	0.0763842	2
Q15020	114	SART3	SART3_C114	SART3_HUMAN Squamous cell carcinoma antigen recognized by T-cells 3 OS=Homo sapiens OX=9606 GN=SART3 PE=1 SV=1	N	NA	C#HVDLIR	C#HVDLIR	NA	1	1	NA	0.079769	0.139783	2
P43243	230	MATR3	MATR3_C230	MATR3_HUMAN Matrin-3 OS=Homo sapiens OX=9606 GN=MATR3 PE=1 SV=2	R	NA	C#RDDSFFGETS C#RDDSFFGET	C#RDDSFFGETS C#RDDSFFGET C#RDDSFFGE	NA	2	3	NA	0.0922093	0.0423871	2
O60716	450	CTNND1	CTNND1_C450	CTND1_HUMAN Catenin delta-1 OS=Homo sapiens OX=9606 GN=CTNND1 PE=1 SV=1	N	NA	C#DGVPALVR	C#DGVPALVR	NA	2	1	NA	0.208632	0.0874792	2
O76071	234	CIAO1	CIAO1_C234	CIAO1_HUMAN Probable cytosolic iron-sulfur protein assembly protein CIAO1 OS=Homo sapiens OX=9606 GN=CIAO1 PE=1 SV=1	A	NA	C#SGSDPSWK	C#SGSDPSWK	NA	1	1	NA	0.0815082	0.3145	2
Q9NR30	418	DDX21	DDX21_C418	DDX21_HUMAN Nucleolar RNA helicase 2 OS=Homo sapiens OX=9606 GN=DDX21 PE=1 SV=5	K	NA	C#HWTQR	C#HWTQR	NA	1	2	NA	0.0835264	0.202442	2
P52272	114	HNRNPM	HNRNPM_C114	HNRPM_HUMAN Heterogeneous nuclear ribonucleoprotein M OS=Homo sapiens OX=9606 GN=HNRNPM PE=1 SV=3	G	NA	C#AVVEFK	C#AVVEFK	NA	1	2	NA	0.107044	0.0445636	2
Q8IWS0	28	PHF6	PHF6_C28	PHF6_HUMAN PHD finger protein 6 OS=Homo sapiens OX=9606 GN=PHF6 PE=1 SV=1	E	NA	C#GQLLISENQK	C#GQLLISENQK	NA	1	2	NA	0.0845285	0.0573267	2
P34932	779	HSPA4	HSPA4_C779	HSP74_HUMAN Heat shock 70 kDa protein 4 OS=Homo sapiens OX=9606 GN=HSPA4 PE=1 SV=4	T	NA	C#SPIISK	C#SPIISK	NA	1	2	NA	0.0870793	0.201602	2
O75533	1035	SF3B1	SF3B1_C1035	SF3B1_HUMAN Splicing factor 3B subunit 1 OS=Homo sapiens OX=9606 GN=SF3B1 PE=1 SV=3	N	NA	C#IDLVGR	C#IDLVGR	NA	1	1	NA	0.0872567	0.0661235	2
P00558	50	PGK1	PGK1_C50	PGK1_HUMAN Phosphoglycerate kinase 1 OS=Homo sapiens OX=9606 GN=PGK1 PE=1 SV=3	F	NA	C#LDNGAK	C#LDNGAK	NA	1	1	NA	0.0893425	0.0211976	2
O14545	267	TRAFD1	TRAFD1_C267	TRAD1_HUMAN TRAF-type zinc finger domain-containing protein 1 OS=Homo sapiens OX=9606 GN=TRAFD1 PE=1 SV=1	V	NA	C#EADQSHGGPR	C#EADQSHGGPR	NA	2	1	NA	0.183242	0.177096	2
Q14008	1500	CKAP5	CKAP5_C1500	CKAP5_HUMAN Cytoskeleton-associated protein 5 OS=Homo sapiens OX=9606 GN=CKAP5 PE=1 SV=3	R	NA	C#EMPELVQHK	C#EMPELVQHK C#EMPELVQH	NA	1	4	NA	0.0919754	0.00647055	2
Q14241	610	ELOA	ELOA_C610	ELOA1_HUMAN Elongin-A OS=Homo sapiens OX=9606 GN=ELOA PE=1 SV=2	R	NA	C#TPDQLYR	C#TPDQLYR	NA	1	1	NA	0.0924543	0.0220626	2
Q7LBC6	1392	KDM3B	KDM3B_C1392	KDM3B_HUMAN Lysine-specific demethylase 3B OS=Homo sapiens OX=9606 GN=KDM3B PE=1 SV=2	L	NA	C#LHDPSNK	C#LHDPSNK	NA	2	1	NA	0.119186	0.0695838	2
O00410	110	IPO5	IPO5_C110	IPO5_HUMAN Importin-5 OS=Homo sapiens OX=9606 GN=IPO5 PE=1 SV=4	V	NA	C#DIAAELAR	C#DIAAELAR	NA	1	1	NA	0.0960461	0.0132594	2
Q99547	67	MPHOSPH6	MPHOSPH6_C67	MPH6_HUMAN M-phase phosphoprotein 6 OS=Homo sapiens OX=9606 GN=MPHOSPH6 PE=1 SV=2	L	NA	C#EDLLYGR	C#EDLLYGR	NA	1	1	NA	0.0969931	0.0615696	2
Q8N684	399	CPSF7	CPSF7_C399	CPSF7_HUMAN Cleavage and polyadenylation specificity factor subunit 7 OS=Homo sapiens OX=9606 GN=CPSF7 PE=1 SV=1	D	NA	C#LHGIEAK	C#LHGIEAK	NA	1	1	NA	0.0976467	0.00699181	2
P78527	478	PRKDC	PRKDC_C478	PRKDC_HUMAN DNA-dependent protein kinase catalytic subunit OS=Homo sapiens OX=9606 GN=PRKDC PE=1 SV=3	N	NA	C#ISTVVHQGLIR C#ISTVVHQ	C#ISTVVHQ	NA	3	1	NA	0.120261	0.204229	2
P43243	821	MATR3	MATR3_C821	MATR3_HUMAN Matrin-3 OS=Homo sapiens OX=9606 GN=MATR3 PE=1 SV=2	H	NA	C#SSLPHYQ	C#SSLPHYQK C#SSLPHYQ	NA	1	5	NA	0.1003	0.139642	2
O60671	215	RAD1	RAD1_C215	RAD1_HUMAN Cell cycle checkpoint protein RAD1 OS=Homo sapiens OX=9606 GN=RAD1 PE=1 SV=1	H	NA	C#NQTQVNR	C#NQTQVNR	NA	1	1	NA	0.101083	0.0184621	2
Q12789	1704	GTF3C1	GTF3C1_C1704	TF3C1_HUMAN General transcription factor 3C polypeptide 1 OS=Homo sapiens OX=9606 GN=GTF3C1 PE=1 SV=4	S	NA	C#LPDTFTK	C#LPDTFTK	NA	1	1	NA	0.102978	0.0478277	2
P28838	335	LAP3	LAP3_C335	AMPL_HUMAN Cytosol aminopeptidase OS=Homo sapiens OX=9606 GN=LAP3 PE=1 SV=3	L	NA	C#ENMPSGK	C#ENMPSGK	NA	1	1	NA	0.103274	0.0980148	2
Q9BUK6	511	MSTO1	MSTO1_C511	MSTO1_HUMAN Protein misato homolog 1 OS=Homo sapiens OX=9606 GN=MSTO1 PE=1 SV=1	L	NA	C#SSSSLHQTL	C#SSSSLHQTLEAL C#SSSSLHQTL	NA	1	2	NA	0.103333	0.0280529	2
Q15054	137	POLD3	POLD3_C137	DPOD3_HUMAN DNA polymerase delta subunit 3 OS=Homo sapiens OX=9606 GN=POLD3 PE=1 SV=2	Q	NA	C#AAAVPR	C#AAAVPR	NA	1	1	NA	0.104573	0.109494	2
O00139	406	KIF2A	KIF2A_C406	KIF2A_HUMAN Kinesin-like protein KIF2A OS=Homo sapiens OX=9606 GN=KIF2A PE=1 SV=3	K	NA	C#VEDVLK	C#VEDVLK	NA	1	1	NA	0.10463	0.039145	2
P51610	326	HCFC1	HCFC1_C326	HCFC1_HUMAN Host cell factor 1 OS=Homo sapiens OX=9606 GN=HCFC1 PE=1 SV=2	H	NA	C#AVAINTR	C#AVAINTR	NA	1	1	NA	0.105666	0.0489233	2
Q9BPX3	202	NCAPG	NCAPG_C202	CND3_HUMAN Condensin complex subunit 3 OS=Homo sapiens OX=9606 GN=NCAPG PE=1 SV=1	S	NA	C#IAPSAK	C#IAPSAK	NA	1	1	NA	0.108265	0.0459247	2
Q7Z417	234	NUFIP2	NUFIP2_C234	NUFP2_HUMAN Nuclear fragile X mental retardation-interacting protein 2 OS=Homo sapiens OX=9606 GN=NUFIP2 PE=1 SV=1	G	NA	C#ENLNIVQDK	C#ENLNIVQDK	NA	1	1	NA	0.110379	0.0134894	2
Q00610	491	CLTC	CLTC_C491	CLH1_HUMAN Clathrin heavy chain 1 OS=Homo sapiens OX=9606 GN=CLTC PE=1 SV=5	Q	NA	C#FAETGQVQK C#FAETGQVQ	C#FAETGQVQK	NA	2	1	NA	0.176056	0.00233357	2
Q13547	261	HDAC1	HDAC1_C261	HDAC1_HUMAN Histone deacetylase 1 OS=Homo sapiens OX=9606 GN=HDAC1 PE=1 SV=1	Q	NA	C#GSDSLSGDR	C#GSDSLSGDR	NA	1	1	NA	0.111124	0.333277	2
P10155	102	RO60	RO60_C102	RO60_HUMAN 60 kDa SS-A/Ro ribonucleoprotein OS=Homo sapiens OX=9606 GN=RO60 PE=1 SV=2	Q	NA	C#SDISTK	C#SDISTK	NA	2	1	NA	0.117308	0.0339627	2
P10599	73	TXN	TXN_C73	THIO_HUMAN Thioredoxin OS=Homo sapiens OX=9606 GN=TXN PE=1 SV=3	K	NA	C#MPTFQ C#MPTFQFFK	C#MPTFQFFK	NA	2	2	NA	0.118452	0.0273998	2
P33240	150	CSTF2	CSTF2_C150	CSTF2_HUMAN Cleavage stimulation factor subunit 2 OS=Homo sapiens OX=9606 GN=CSTF2 PE=1 SV=1	L	NA	C#VQNSPQEAR	C#VQNSPQEAR	NA	1	2	NA	0.113296	0.145901	2
Q5JTZ9	555	AARS2	AARS2_C555	SYAM_HUMAN Alanine--tRNA ligase, mitochondrial OS=Homo sapiens OX=9606 GN=AARS2 PE=1 SV=1	R	NA	C#GLLLDR	C#GLLLDR	NA	2	1	NA	0.14367	0.108608	2
Q14166	361	TTLL12	TTLL12_C361	TTL12_HUMAN Tubulin--tyrosine ligase-like protein 12 OS=Homo sapiens OX=9606 GN=TTLL12 PE=1 SV=2	P	NA	C#ENLLTVK	C#ENLLTVK	NA	1	2	NA	0.114027	0.103083	2
Q14566	302	MCM6	MCM6_C302	MCM6_HUMAN DNA replication licensing factor MCM6 OS=Homo sapiens OX=9606 GN=MCM6 PE=1 SV=1	C	NA	C#VAPTNPR	C#VAPTNPR	NA	1	1	NA	0.114485	0.113965	2
Q96JC9	46	EAF1	EAF1_C46	EAF1_HUMAN ELL-associated factor 1 OS=Homo sapiens OX=9606 GN=EAF1 PE=1 SV=1	S	NA	C#EGELQVGK	C#EGELQVGK	NA	1	1	NA	0.115198	0.0321365	2
P36776	909	LONP1	LONP1_C909	LONM_HUMAN Lon protease homolog, mitochondrial OS=Homo sapiens OX=9606 GN=LONP1 PE=1 SV=2	T	NA	C#IVLPAENK	C#IVLPAENK	NA	1	1	NA	0.115221	0.00971559	2
Q14331	205	FRG1	FRG1_C205	FRG1_HUMAN Protein FRG1 OS=Homo sapiens OX=9606 GN=FRG1 PE=1 SV=1	Q	NA	C#EINYVK	C#EINYVK	NA	1	1	NA	0.115323	0.194506	2
P34932	38	HSPA4	HSPA4_C38	HSP74_HUMAN Heat shock 70 kDa protein 4 OS=Homo sapiens OX=9606 GN=HSPA4 PE=1 SV=4	A	NA	C#ISFGPK	C#ISFGPK	NA	2	1	NA	0.128384	0.200804	2
Q9Y512	457	SAMM50	SAMM50_C457	SAM50_HUMAN Sorting and assembly machinery component 50 homolog OS=Homo sapiens OX=9606 GN=SAMM50 PE=1 SV=3	I	NA	C#DGVQFGAGIR	C#DGVQFGAGIR	NA	2	1	NA	0.124561	0.0023021	2
Q9NVU0	553	POLR3E	POLR3E_C553	RPC5_HUMAN DNA-directed RNA polymerase III subunit RPC5 OS=Homo sapiens OX=9606 GN=POLR3E PE=1 SV=1	G	NA	C#ASTPVAR	C#ASTPVAR	NA	1	1	NA	0.117249	0.0318778	2
P49368	455	CCT3	CCT3_C455	TCPG_HUMAN T-complex protein 1 subunit gamma OS=Homo sapiens OX=9606 GN=CCT3 PE=1 SV=4	N	NA	C#GASTIR	C#GASTIR	NA	1	1	NA	0.117463	0.120086	2
Q9ULT8	936	HECTD1	HECTD1_C936	HECD1_HUMAN E3 ubiquitin-protein ligase HECTD1 OS=Homo sapiens OX=9606 GN=HECTD1 PE=1 SV=3	D	NA	C#SQLVER	C#SQLVER	NA	2	2	NA	0.187486	0.106317	2
P49790	404	NUP153	NUP153_C404	NU153_HUMAN Nuclear pore complex protein Nup153 OS=Homo sapiens OX=9606 GN=NUP153 PE=1 SV=2	K	NA	C#STGYEK	C#STGYEK	NA	1	1	NA	0.118218	0.0474046	2
O15344	580	MID1	MID1_C580	TRI18_HUMAN E3 ubiquitin-protein ligase Midline-1 OS=Homo sapiens OX=9606 GN=MID1 PE=1 SV=1	R	NA	C#NNNWVVR	C#NNNWVVR	NA	1	1	NA	0.118568	0.172161	2
Q9Y4A5	2449	TRRAP	TRRAP_C2449	TRRAP_HUMAN Transformation/transcription domain-associated protein OS=Homo sapiens OX=9606 GN=TRRAP PE=1 SV=3	R	NA	C#AQPLIR	C#AQPLIR	NA	1	1	NA	0.119849	0.0451877	2
O75607	41	NPM3	NPM3_C41	NPM3_HUMAN Nucleoplasmin-3 OS=Homo sapiens OX=9606 GN=NPM3 PE=1 SV=3	G	NA	C#ELSGHTR	C#ELSGHTR	NA	1	1	NA	0.12091	0.0237731	2
Q9NRZ9	169	HELLS	HELLS_C169	HELLS_HUMAN Lymphoid-specific helicase OS=Homo sapiens OX=9606 GN=HELLS PE=1 SV=1	L	NA	C#VEDLQK	C#VEDLQK	NA	1	1	NA	0.122049	0.0583766	2
P53618	835	COPB1	COPB1_C835	COPB_HUMAN Coatomer subunit beta OS=Homo sapiens OX=9606 GN=COPB1 PE=1 SV=3	T	NA	C#TDAEFR	C#TDAEFR	NA	1	2	NA	0.12238	0.154743	2
Q9BYC9	93	MRPL20	MRPL20_C93	RM20_HUMAN 39S ribosomal protein L20, mitochondrial OS=Homo sapiens OX=9606 GN=MRPL20 PE=1 SV=1	K	NA	C#QVELNR	C#QVELNR	NA	1	1	NA	0.12351	0.0439978	2
Q9BSH4	256	TACO1	TACO1_C256	TACO1_HUMAN Translational activator of cytochrome c oxidase 1 OS=Homo sapiens OX=9606 GN=TACO1 PE=1 SV=1	S	NA	C#ALEFIPNSK	C#ALEFIPNSK	NA	1	1	NA	0.123574	0.0903631	2
Q14980	1907	NUMA1	NUMA1_C1907	NUMA1_HUMAN Nuclear mitotic apparatus protein 1 OS=Homo sapiens OX=9606 GN=NUMA1 PE=1 SV=2	T	NA	C#QDEPEQLDDWNR	C#QDEPEQLDDWNR	NA	1	1	NA	0.125382	0.00226322	2
Q86UV5	1021	USP48	USP48_C1021	UBP48_HUMAN Ubiquitin carboxyl-terminal hydrolase 48 OS=Homo sapiens OX=9606 GN=USP48 PE=1 SV=1	V	NA	C#MPEEGFK	C#MPEEGFK	NA	1	4	NA	0.12599	0.182288	2
P49189	220	ALDH9A1	ALDH9A1_C220	AL9A1_HUMAN 4-trimethylaminobutyraldehyde dehydrogenase OS=Homo sapiens OX=9606 GN=ALDH9A1 PE=1 SV=3	L	NA	C#QHPDVAK	C#QHPDVAK	NA	1	1	NA	0.129599	0.051129	2
P40429	38	RPL13A	RPL13A_C38	RL13A_HUMAN 60S ribosomal protein L13a OS=Homo sapiens OX=9606 GN=RPL13A PE=1 SV=2	R	NA	C#EGINIS	C#EGINISGNFYR	NA	1	1	NA	0.129977	0.0575971	2
Q7Z434	46	MAVS	MAVS_C46	MAVS_HUMAN Mitochondrial antiviral-signaling protein OS=Homo sapiens OX=9606 GN=MAVS PE=1 SV=2	T	NA	C#TLSGNR	C#TLSGNR	NA	1	1	NA	0.130766	0.110445	2
P27708	1889	CAD	CAD_C1889	PYR1_HUMAN CAD protein OS=Homo sapiens OX=9606 GN=CAD PE=1 SV=3	T	NA	C#YPPPPVPR	C#YPPPPVPR	NA	3	4	NA	0.301504	0.169385	2
P27708	868	CAD	CAD_C868	PYR1_HUMAN CAD protein OS=Homo sapiens OX=9606 GN=CAD PE=1 SV=3	K	NA	C#LGFSDK	C#LGFSDK	NA	1	1	NA	0.132857	0.0359027	2
O75821	25	EIF3G	EIF3G_C25	EIF3G_HUMAN Eukaryotic translation initiation factor 3 subunit G OS=Homo sapiens OX=9606 GN=EIF3G PE=1 SV=2	K	NA	C#VTSELLK	C#VTSELLK	NA	1	1	NA	0.133247	0.0431452	2
O95239	1171	KIF4A	KIF4A_C1171	KIF4A_HUMAN Chromosome-associated kinesin KIF4A OS=Homo sapiens OX=9606 GN=KIF4A PE=1 SV=3	M	NA	C#DVEQVLSK	C#DVEQVLSK	NA	1	1	NA	0.133478	0.0699303	2
Q9NNW5	771	WDR6	WDR6_C771	WDR6_HUMAN WD repeat-containing protein 6 OS=Homo sapiens OX=9606 GN=WDR6 PE=1 SV=1	V	NA	C#NHISSVR	C#NHISSVR	NA	1	1	NA	0.135515	0.12237	2
Q8NCM8	2793	DYNC2H1	DYNC2H1_C2793	DYHC2_HUMAN Cytoplasmic dynein 2 heavy chain 1 OS=Homo sapiens OX=9606 GN=DYNC2H1 PE=1 SV=4	N	NA	C#ESNPALHK	C#ESNPALHK	NA	1	1	NA	0.137123	0.0595434	2
P46379	856	BAG6	BAG6_C856	BAG6_HUMAN Large proline-rich protein BAG6 OS=Homo sapiens OX=9606 GN=BAG6 PE=1 SV=2	H	NA	C#TDSGFGAR	C#TDSGFGAR	NA	1	1	NA	0.13738	0.0077099	2
Q8NCA5	126	FAM98A	FAM98A_C126	FA98A_HUMAN Protein FAM98A OS=Homo sapiens OX=9606 GN=FAM98A PE=1 SV=2	L	NA	C#VNAPPK	C#VNAPPK	NA	4	4	NA	0.209261	0.170452	2
Q4VCS5	254	AMOT	AMOT_C254	AMOT_HUMAN Angiomotin OS=Homo sapiens OX=9606 GN=AMOT PE=1 SV=1	V	NA	C#KPQEPGHFY C#KPQEPGHFYSEHR	C#KPQEPGHFYSEHR C#KPQEPGHFYSE	NA	2	2	NA	0.143939	0.164372	2
Q9BY44	306	EIF2A	EIF2A_C306	EIF2A_HUMAN Eukaryotic translation initiation factor 2A OS=Homo sapiens OX=9606 GN=EIF2A PE=1 SV=3	K	NA	C#DPVFDFGTGPR	C#DPVFDFGTGPR	NA	1	1	NA	0.140089	0.0299924	2
Q9UHV7	1274	MED13	MED13_C1274	MED13_HUMAN Mediator of RNA polymerase II transcription subunit 13 OS=Homo sapiens OX=9606 GN=MED13 PE=1 SV=3	Q	NA	C#SQDILR	C#SQDILR	NA	1	1	NA	0.140619	0.100818	2
Q15942	387	ZYX	ZYX_C387	ZYX_HUMAN Zyxin OS=Homo sapiens OX=9606 GN=ZYX PE=1 SV=1	R	NA	C#HQPLAR	C#HQPLAR	NA	1	1	NA	0.142006	0.0504666	2
Q9NYP9	25	MIS18A	MIS18A_C25	MS18A_HUMAN Protein Mis18-alpha OS=Homo sapiens OX=9606 GN=MIS18A PE=1 SV=1	K	NA	C#SDSSLLGK	C#SDSSLLGK	NA	1	1	NA	0.142123	0.0183779	2
O95218	20	ZRANB2	ZRANB2_C20	ZRAB2_HUMAN Zinc finger Ran-binding domain-containing protein 2 OS=Homo sapiens OX=9606 GN=ZRANB2 PE=1 SV=2	K	NA	C#GNVNFAR	C#GNVNFAR	NA	1	1	NA	0.145664	0.0164492	2
Q5VYK3	1183	ECPAS	ECPAS_C1183	ECM29_HUMAN Proteasome adapter and scaffold protein ECM29 OS=Homo sapiens OX=9606 GN=ECPAS PE=1 SV=2	S	NA	C#LALNDLLR	C#LALNDLLR	NA	1	1	NA	0.146595	0.229736	2
P38919	99	EIF4A3	EIF4A3_C99	IF4A3_HUMAN Eukaryotic initiation factor 4A-III OS=Homo sapiens OX=9606 GN=EIF4A3 PE=1 SV=4	Q	NA	C#LDIQVR	C#LDIQVR	NA	1	2	NA	0.147105	0.171687	2
Q9NP61	241	ARFGAP3	ARFGAP3_C241	ARFG3_HUMAN ADP-ribosylation factor GTPase-activating protein 3 OS=Homo sapiens OX=9606 GN=ARFGAP3 PE=1 SV=1	T	NA	C#FNEIEK	C#FNEIEKQ	NA	1	1	NA	0.147148	0.141928	2
Q9BT22	396	ALG1	ALG1_C396	ALG1_HUMAN Chitobiosyldiphosphodolichol beta-mannosyltransferase OS=Homo sapiens OX=9606 GN=ALG1 PE=1 SV=2	K	NA	C#LHELVK	C#LHELVK	NA	1	2	NA	0.148754	0.058685	2
O00231	113	PSMD11	PSMD11_C113	PSD11_HUMAN 26S proteasome non-ATPase regulatory subunit 11 OS=Homo sapiens OX=9606 GN=PSMD11 PE=1 SV=3	E	NA	C#IEWAK	C#IEWAK	NA	1	1	NA	0.150623	0.170975	2
Q9UJV3	630	MID2	MID2_C630	TRIM1_HUMAN Probable E3 ubiquitin-protein ligase MID2 OS=Homo sapiens OX=9606 GN=MID2 PE=1 SV=3	R	NA	C#NSNFVVR	C#NSNFVVR	NA	1	1	NA	0.15298	0.108313	2
Q14974	543	KPNB1	KPNB1_C543	IMB1_HUMAN Importin subunit beta-1 OS=Homo sapiens OX=9606 GN=KPNB1 PE=1 SV=2	D	NA	C#YPAVQK	C#YPAVQK	NA	1	2	NA	0.153104	0.108354	2
Q96RG2	804	PASK	PASK_C804	PASK_HUMAN PAS domain-containing serine/threonine-protein kinase OS=Homo sapiens OX=9606 GN=PASK PE=1 SV=3	T	NA	C#VDLGQGR	C#VDLGQGR	NA	1	1	NA	0.15505	0.0553807	2
Q14203	636	DCTN1	DCTN1_C636	DCTN1_HUMAN Dynactin subunit 1 OS=Homo sapiens OX=9606 GN=DCTN1 PE=1 SV=3	N	NA	C#SERPGLR	C#SERPGLR	NA	2	2	NA	0.255688	0.127279	2
P42025	34	ACTR1B	ACTR1B_C34	ACTY_HUMAN Beta-centractin OS=Homo sapiens OX=9606 GN=ACTR1B PE=1 SV=1	Y	NA	C#FPNYVGR	C#FPNYVGR	NA	1	1	NA	0.156111	0.0771874	2
Q9NRZ9	205	HELLS	HELLS_C205	HELLS_HUMAN Lymphoid-specific helicase OS=Homo sapiens OX=9606 GN=HELLS PE=1 SV=1	K	NA	C#NGQPVPFQQPK	C#NGQPVPFQQPK	NA	1	1	NA	0.156376	0.00204086	2
P53618	248	COPB1	COPB1_C248	COPB_HUMAN Coatomer subunit beta OS=Homo sapiens OX=9606 GN=COPB1 PE=1 SV=3	R	NA	C#IYNLLQSSSPAVK	C#IYNLLQSSSPAVK	NA	1	1	NA	0.157536	0.235284	2
P55209	258	NAP1L1	NAP1L1_C258	NP1L1_HUMAN Nucleosome assembly protein 1-like 1 OS=Homo sapiens OX=9606 GN=NAP1L1 PE=1 SV=1	G	NA	C#QIDWK	C#QIDWK	NA	1	1	NA	0.157963	0.155714	2
Q14C86	568	GAPVD1	GAPVD1_C568	GAPD1_HUMAN GTPase-activating protein and VPS9 domain-containing protein 1 OS=Homo sapiens OX=9606 GN=GAPVD1 PE=1 SV=2	L	NA	C#SDNLEGISEGPSNR	C#SDNLEGISEGPSNR	NA	1	2	NA	0.158704	0.0825904	2
P60981	23	DSTN	DSTN_C23	DEST_HUMAN Destrin OS=Homo sapiens OX=9606 GN=DSTN PE=1 SV=3	K	NA	C#STPEEIKK	C#STPEEIKK C#STPEEIK	NA	2	3	NA	0.266165	0.0132851	2
Q00535	269	CDK5	CDK5_C269	CDK5_HUMAN Cyclin-dependent-like kinase 5 OS=Homo sapiens OX=9606 GN=CDK5 PE=1 SV=3	K	NA	C#NPVQR	C#NPVQR	NA	1	3	NA	0.160036	0.0800874	2
Q12769	292	NUP160	NUP160_C292	NU160_HUMAN Nuclear pore complex protein Nup160 OS=Homo sapiens OX=9606 GN=NUP160 PE=1 SV=3	H	NA	C#VEHDAFIF	C#VEHDAFIF	NA	1	1	NA	0.163263	0.299152	2
Q8IY67	297	RAVER1	RAVER1_C297	RAVR1_HUMAN Ribonucleoprotein PTB-binding 1 OS=Homo sapiens OX=9606 GN=RAVER1 PE=1 SV=1	F	NA	C#APGPPGR	C#APGPPGR	NA	1	1	NA	0.163496	0.0807805	2
Q9H425	73	C1orf198	C1orf198_C73	CA198_HUMAN Uncharacterized protein C1orf198 OS=Homo sapiens OX=9606 GN=C1orf198 PE=1 SV=1	R	NA	C#LVGPR	C#LVGPR	NA	1	1	NA	0.166939	0.276013	2
P46459	21	NSF	NSF_C21	NSF_HUMAN Vesicle-fusing ATPase OS=Homo sapiens OX=9606 GN=NSF PE=1 SV=3	N	NA	C#AVVNEK	C#AVVNEK	NA	1	1	NA	0.167426	0.0300719	2
Q9BV20	128	MRI1	MRI1_C128	MTNA_HUMAN Methylthioribose-1-phosphate isomerase OS=Homo sapiens OX=9606 GN=MRI1 PE=1 SV=1	C	NA	C#TEDMLEK	C#TEDMLEK	NA	1	1	NA	0.170817	0.283007	2
Q14192	254	FHL2	FHL2_C254	FHL2_HUMAN Four and a half LIM domains protein 2 OS=Homo sapiens OX=9606 GN=FHL2 PE=1 SV=3	K	NA	C#SLSLVGR	C#SLSLVGR	NA	2	1	NA	0.20902	0.032542	2
O95218	74	ZRANB2	ZRANB2_C74	ZRAB2_HUMAN Zinc finger Ran-binding domain-containing protein 2 OS=Homo sapiens OX=9606 GN=ZRANB2 PE=1 SV=2	T	NA	C#SNVNWAR	C#SNVNWAR	NA	1	1	NA	0.17416	0.0397265	2
P25398	56	RPS12	RPS12_C56	RS12_HUMAN 40S ribosomal protein S12 OS=Homo sapiens OX=9606 GN=RPS12 PE=1 SV=3	N	NA	C#DEPMYVK	C#DEPMYVK	NA	1	4	NA	0.17442	0.0334919	2
Q13643	10	FHL3	FHL3_C10	FHL3_HUMAN Four and a half LIM domains protein 3 OS=Homo sapiens OX=9606 GN=FHL3 PE=1 SV=4	K	NA	C#NESLYGR	C#NESLYGR	NA	1	1	NA	0.177668	0.10661	2
Q9H7D7	238	WDR26	WDR26_C238	WDR26_HUMAN WD repeat-containing protein 26 OS=Homo sapiens OX=9606 GN=WDR26 PE=1 SV=3	R	NA	C#ELTPLK	C#ELTPLK	NA	1	1	NA	0.18027	0.0144215	2
Q9BQ70	216	TCF25	TCF25_C216	TCF25_HUMAN Transcription factor 25 OS=Homo sapiens OX=9606 GN=TCF25 PE=1 SV=1	K	NA	C#TWLTTPK	C#TWLTTPK	NA	1	1	NA	0.181062	0.143868	2
Q6UXN9	195	WDR82	WDR82_C195	WDR82_HUMAN WD repeat-containing protein 82 OS=Homo sapiens OX=9606 GN=WDR82 PE=1 SV=1	T	NA	C#EWTGLK	C#EWTGLK	NA	1	1	NA	0.181316	0.169706	2
P49588	525	AARS	AARS_C525	SYAC_HUMAN Alanine--tRNA ligase, cytoplasmic OS=Homo sapiens OX=9606 GN=AARS PE=1 SV=2	E	NA	C#GVVLDK	C#GVVLDK	NA	1	1	NA	0.183737	0.049303	2
Q14839	396	CHD4	CHD4_C396	CHD4_HUMAN Chromodomain-helicase-DNA-binding protein 4 OS=Homo sapiens OX=9606 GN=CHD4 PE=1 SV=2	V	NA	C#LDPDMEK	C#LDPDMEKAPEGK	NA	2	2	NA	0.215133	0.154975	2
Q9UMS4	298	PRPF19	PRPF19_C298	PRP19_HUMAN Pre-mRNA-processing factor 19 OS=Homo sapiens OX=9606 GN=PRPF19 PE=1 SV=1	S	NA	C#VQVVR	C#VQVVR	NA	2	1	NA	0.282307	0.133831	2
Q92598	796	HSPH1	HSPH1_C796	HS105_HUMAN Heat shock protein 105 kDa OS=Homo sapiens OX=9606 GN=HSPH1 PE=1 SV=1	T	NA	C#EPVVTQPK	C#EPVVTQPK	NA	1	1	NA	0.186004	0.0176974	2
O95801	160	TTC4	TTC4_C160	TTC4_HUMAN Tetratricopeptide repeat protein 4 OS=Homo sapiens OX=9606 GN=TTC4 PE=1 SV=3	L	NA	C#HLELK	C#HLELK	NA	1	1	NA	0.187048	0.172048	2
Q15424	463	SAFB	SAFB_C463	SAFB1_HUMAN Scaffold attachment factor B1 OS=Homo sapiens OX=9606 GN=SAFB PE=1 SV=4	K	NA	C#INHLHK	C#INHLHK	NA	1	1	NA	0.189201	0.23856	2
Q0VDF9	89	HSPA14	HSPA14_C89	HSP7E_HUMAN Heat shock 70 kDa protein 14 OS=Homo sapiens OX=9606 GN=HSPA14 PE=1 SV=1	K	NA	C#LVIEK	C#LVIEK	NA	1	1	NA	0.190145	0.22322	2
Q9Y277	36	VDAC3	VDAC3_C36	VDAC3_HUMAN Voltage-dependent anion-selective channel protein 3 OS=Homo sapiens OX=9606 GN=VDAC3 PE=1 SV=1	S	NA	C#SGVEFSTSGHAYTDTGK	C#SGVEFSTSGHAYTDTGK C#SGVEFSTSGHAY C#SGVEFSTSGH	NA	1	4	NA	0.190607	0.00148	2
P62633	140	CNBP	CNBP_C140	CNBP_HUMAN Cellular nucleic acid-binding protein OS=Homo sapiens OX=9606 GN=CNBP PE=1 SV=1	R	NA	C#GETGHVA	C#GETGHVAINCSK C#GETGHVA C#GETGHVAIN	NA	1	3	NA	0.193668	0.151943	2
Q9ULC4	55	MCTS1	MCTS1_C55	MCTS1_HUMAN Malignant T-cell-amplified sequence 1 OS=Homo sapiens OX=9606 GN=MCTS1 PE=1 SV=1	R	NA	C#HEHIEIL	C#HEHIEIL	NA	1	2	NA	0.194206	0.295725	2
Q9NP77	131	SSU72	SSU72_C131	SSU72_HUMAN RNA polymerase II subunit A C-terminal domain phosphatase SSU72 OS=Homo sapiens OX=9606 GN=SSU72 PE=1 SV=1	T	NA	C#QPVHVV	C#QPVHVV	NA	1	1	NA	0.195996	0.210506	2
Q86VQ1	51	GLCCI1	GLCCI1_C51	GLCI1_HUMAN Glucocorticoid-induced transcript 1 protein OS=Homo sapiens OX=9606 GN=GLCCI1 PE=1 SV=1	G	NA	C#APAAGAGR	C#APAAGAGR	NA	1	1	NA	0.197393	0.19298	2
P50990	244	CCT8	CCT8_C244	TCPQ_HUMAN T-complex protein 1 subunit theta OS=Homo sapiens OX=9606 GN=CCT8 PE=1 SV=4	S	NA	C#PFDGMITETK	C#PFDGMITETK	NA	2	3	NA	0.273753	0.00858412	2
P42704	413	LRPPRC	LRPPRC_C413	LPPRC_HUMAN Leucine-rich PPR motif-containing protein, mitochondrial OS=Homo sapiens OX=9606 GN=LRPPRC PE=1 SV=3	H	NA	C#ALLANK	C#ALLANK	NA	1	1	NA	0.200725	0.0791961	2
O75817	66	POP7	POP7_C66	POP7_HUMAN Ribonuclease P protein subunit p20 OS=Homo sapiens OX=9606 GN=POP7 PE=1 SV=2	A	NA	C#SEIYIH	C#SEIYIH	NA	1	1	NA	0.201794	0.252216	2
Q8NG31	562	KNL1	KNL1_C562	KNL1_HUMAN Kinetochore scaffold 1 OS=Homo sapiens OX=9606 GN=KNL1 PE=1 SV=3	N	NA	C#NSVPHVSK	C#NSVPHVSK	NA	1	1	NA	0.203502	0.0163523	2
Q14204	1977	DYNC1H1	DYNC1H1_C1977	DYHC1_HUMAN Cytoplasmic dynein 1 heavy chain 1 OS=Homo sapiens OX=9606 GN=DYNC1H1 PE=1 SV=5	Q	NA	C#IQEALR	C#IQEALR	NA	1	1	NA	0.205323	0.0492257	2
O75521	282	ECI2	ECI2_C282	ECI2_HUMAN Enoyl-CoA delta isomerase 2, mitochondrial OS=Homo sapiens OX=9606 GN=ECI2 PE=1 SV=4	G	NA	C#SSYTFPK	C#SSYTFPK	NA	1	1	NA	0.205532	0.111177	2
Q9Y265	141	RUVBL1	RUVBL1_C141	RUVB1_HUMAN RuvB-like 1 OS=Homo sapiens OX=9606 GN=RUVBL1 PE=1 SV=1	P	NA	C#ETENPMGGYGK	C#ETENPMGGYGK	NA	1	3	NA	0.206094	0.0407522	2
Q86Y56	555	DNAAF5	DNAAF5_C555	DAAF5_HUMAN Dynein assembly factor 5, axonemal OS=Homo sapiens OX=9606 GN=DNAAF5 PE=1 SV=4	S	NA	C#QDLYR	C#QDLYR	NA	1	1	NA	0.206848	0.2369	2
O75131	202	CPNE3	CPNE3_C202	CPNE3_HUMAN Copine-3 OS=Homo sapiens OX=9606 GN=CPNE3 PE=1 SV=1	L	NA	C#YGDMDK	C#YGDMDK	NA	1	1	NA	0.207359	0.109981	2
Q13247	121	SRSF6	SRSF6_C121	SRSF6_HUMAN Serine/arginine-rich splicing factor 6 OS=Homo sapiens OX=9606 GN=SRSF6 PE=1 SV=2	R	NA	C#SWQDLK	C#SWQDLK	NA	1	1	NA	0.207842	0.11095	2
Q8TD19	626	NEK9	NEK9_C626	NEK9_HUMAN Serine/threonine-protein kinase Nek9 OS=Homo sapiens OX=9606 GN=NEK9 PE=1 SV=2	K	NA	C#GQLGVGNYK	C#GQLGVGNYK	NA	1	1	NA	0.210256	0.00444133	2
P49790	21	NUP153	NUP153_C21	NU153_HUMAN Nuclear pore complex protein Nup153 OS=Homo sapiens OX=9606 GN=NUP153 PE=1 SV=2	R	NA	C#HQGPIKPY	C#HQGPIKPY	NA	1	2	NA	0.21152	0.080243	2
Q14676	1742	MDC1	MDC1_C1742	MDC1_HUMAN Mediator of DNA damage checkpoint protein 1 OS=Homo sapiens OX=9606 GN=MDC1 PE=1 SV=3	P	NA	C#SAPLEPK	C#SAPLEPK	NA	1	1	NA	0.211561	0.1542	2
P78527	1335	PRKDC	PRKDC_C1335	PRKDC_HUMAN DNA-dependent protein kinase catalytic subunit OS=Homo sapiens OX=9606 GN=PRKDC PE=1 SV=3	K	NA	C#TVVVR	C#TVVVR	NA	1	1	NA	0.218411	0.302728	2
P12268	173	IMPDH2	IMPDH2_C173	IMDH2_HUMAN Inosine-5'-monophosphate dehydrogenase 2 OS=Homo sapiens OX=9606 GN=IMPDH2 PE=1 SV=2	D	NA	C#FLEEIMTK	C#FLEEIMTK	NA	1	3	NA	0.221322	0.0130312	2
P49841	199	GSK3B	GSK3B_C199	GSK3B_HUMAN Glycogen synthase kinase-3 beta OS=Homo sapiens OX=9606 GN=GSK3B PE=1 SV=2	L	NA	C#DFGSAK	C#DFGSAK	NA	1	1	NA	0.234138	0.101016	2
Q96I25	385	RBM17	RBM17_C385	SPF45_HUMAN Splicing factor 45 OS=Homo sapiens OX=9606 GN=RBM17 PE=1 SV=1	A	NA	C#FYNLDK	C#FYNLDK	NA	1	1	NA	0.234423	0.086926	2
Q14738	410	PPP2R5D	PPP2R5D_C410	2A5D_HUMAN Serine/threonine-protein phosphatase 2A 56 kDa regulatory subunit delta isoform OS=Homo sapiens OX=9606 GN=PPP2R5D PE=1 SV=1	K	NA	C#VSSPHFQVA	C#VSSPHFQVAER	NA	1	2	NA	0.238791	0.0189181	2
Q5ST30	845	VARS2	VARS2_C845	SYVM_HUMAN Valine--tRNA ligase, mitochondrial OS=Homo sapiens OX=9606 GN=VARS2 PE=1 SV=2	S	NA	C#ADLGLR	C#ADLGLR	NA	1	1	NA	0.240955	0.103453	2
Q8WW01	13	TSEN15	TSEN15_C13	SEN15_HUMAN tRNA-splicing endonuclease subunit Sen15 OS=Homo sapiens OX=9606 GN=TSEN15 PE=1 SV=1	G	NA	C#SGLGPGGVR	C#SGLGPGGVR	NA	1	1	NA	0.24181	0.00420545	2
P09874	24	PARP1	PARP1_C24	PARP1_HUMAN Poly [ADP-ribose] polymerase 1 OS=Homo sapiens OX=9606 GN=PARP1 PE=1 SV=4	K	NA	C#SESIPK	C#SESIPK	NA	1	1	NA	0.244817	0.0568199	2
P0DMV8	306	HSPA1A	HSPA1A_C306	HS71A_HUMAN Heat shock 70 kDa protein 1A OS=Homo sapiens OX=9606 GN=HSPA1A PE=1 SV=1	L	NA	C#SDIFR	C#SDIFR	NA	1	1	NA	0.248423	0.203995	2
P26358	1125	DNMT1	DNMT1_C1125	DNMT1_HUMAN DNA (cytosine-5)-methyltransferase 1 OS=Homo sapiens OX=9606 GN=DNMT1 PE=1 SV=2	A	NA	C#EPSEPEIEIK	C#EPSEPEIEIK	NA	1	1	NA	0.249575	0.328005	2
O15371	196	EIF3D	EIF3D_C196	EIF3D_HUMAN Eukaryotic translation initiation factor 3 subunit D OS=Homo sapiens OX=9606 GN=EIF3D PE=1 SV=1	C	NA	C#GALEYYDK	C#GALEYYDK	NA	2	3	NA	0.313022	0.255285	2
Q9NPD8	24	UBE2T	UBE2T_C24	UBE2T_HUMAN Ubiquitin-conjugating enzyme E2 T OS=Homo sapiens OX=9606 GN=UBE2T PE=1 SV=1	T	NA	C#WQDKDQMDDLR	C#WQDKDQMDDLR	NA	1	2	NA	0.255135	0.00610111	2
P30260	576	CDC27	CDC27_C576	CDC27_HUMAN Cell division cycle protein 27 homolog OS=Homo sapiens OX=9606 GN=CDC27 PE=1 SV=2	N	NA	C#FSLQR	C#FSLQR	NA	1	2	NA	0.258858	0.269852	2
O43491	867	EPB41L2	EPB41L2_C867	E41L2_HUMAN Band 4.1-like protein 2 OS=Homo sapiens OX=9606 GN=EPB41L2 PE=1 SV=1	C	NA	C#SEPPVVK	C#SEPPVVK	NA	1	3	NA	0.259715	0.0157818	2
P34932	310	HSPA4	HSPA4_C310	HSP74_HUMAN Heat shock 70 kDa protein 4 OS=Homo sapiens OX=9606 GN=HSPA4 PE=1 SV=4	M	NA	C#NDLLAR	C#NDLLAR	NA	1	1	NA	0.260019	0.118401	2
Q5QJE6	116	DNTTIP2	DNTTIP2_C116	TDIF2_HUMAN Deoxynucleotidyltransferase terminal-interacting protein 2 OS=Homo sapiens OX=9606 GN=DNTTIP2 PE=1 SV=2	A	NA	C#SPVSSVR	C#SPVSSVR	NA	1	1	NA	0.261528	0.312734	2
O43929	16	ORC4	ORC4_C16	ORC4_HUMAN Origin recognition complex subunit 4 OS=Homo sapiens OX=9606 GN=ORC4 PE=1 SV=2	E	NA	C#LSQVQ	C#LSQVQR	NA	1	1	NA	0.271405	0.276721	2
Q15942	492	ZYX	ZYX_C492	ZYX_HUMAN Zyxin OS=Homo sapiens OX=9606 GN=ZYX PE=1 SV=1	H	NA	C#VPDYHK	C#VPDYHK	NA	1	4	NA	0.271885	0.167027	2
Q9Y2L5	339	TRAPPC8	TRAPPC8_C339	TPPC8_HUMAN Trafficking protein particle complex subunit 8 OS=Homo sapiens OX=9606 GN=TRAPPC8 PE=1 SV=2	A	NA	C#LTLTDHDR	C#LTLTDHDR	NA	1	3	NA	0.274672	0.0581763	2
Q9Y5X2	442	SNX8	SNX8_C442	SNX8_HUMAN Sorting nexin-8 OS=Homo sapiens OX=9606 GN=SNX8 PE=1 SV=1	S	NA	C#LFAGPH	C#LFAGPH	NA	1	1	NA	0.280274	0.381036	2
Q96T88	727	UHRF1	UHRF1_C727	UHRF1_HUMAN E3 ubiquitin-protein ligase UHRF1 OS=Homo sapiens OX=9606 GN=UHRF1 PE=1 SV=1	C	NA	C#QELVFR	C#QELVFR	NA	1	1	NA	0.284894	0.351684	2
Q9H2P9	241	DPH5	DPH5_C241	DPH5_HUMAN Diphthine methyl ester synthase OS=Homo sapiens OX=9606 GN=DPH5 PE=1 SV=2	M	NA	C#TVDLGEPL	C#TVDLGEPLHSL	NA	1	1	NA	0.28576	0.00563347	2
O43913	96	ORC5	ORC5_C96	ORC5_HUMAN Origin recognition complex subunit 5 OS=Homo sapiens OX=9606 GN=ORC5 PE=1 SV=1	T	NA	C#ETFNDFVR	C#ETFNDFVR	NA	1	1	NA	0.286083	0.0361019	2
Q9NPB9	132	ACKR4	ACKR4_C132	ACKR4_HUMAN Atypical chemokine receptor 4 OS=Homo sapiens OX=9606 GN=ACKR4 PE=1 SV=1	A	NA	C#ISIDR	C#ISIDR	NA	1	1	NA	0.287519	0.143345	2
Q96PM5	136	RCHY1	RCHY1_C136	ZN363_HUMAN RING finger and CHY zinc finger domain-containing protein 1 OS=Homo sapiens OX=9606 GN=RCHY1 PE=1 SV=1	K	NA	C#IENVSR	C#IENVSR	NA	1	1	NA	0.288315	0.0643081	2
Q9P2J5	305	LARS	LARS_C305	SYLC_HUMAN Leucine--tRNA ligase, cytoplasmic OS=Homo sapiens OX=9606 GN=LARS PE=1 SV=2	N	NA	C#WVRPDMK	C#WVRPDMK	NA	1	1	NA	0.2976	0.0243246	2
O00410	915	IPO5	IPO5_C915	IPO5_HUMAN Importin-5 OS=Homo sapiens OX=9606 GN=IPO5 PE=1 SV=4	V	NA	C#DNSPEVR	C#DNSPEVR	NA	1	1	NA	0.297768	0.175824	2
O60313	801	OPA1	OPA1_C801	OPA1_HUMAN Dynamin-like 120 kDa protein, mitochondrial OS=Homo sapiens OX=9606 GN=OPA1 PE=1 SV=3	K	NA	C#NEEHPAYLA	C#NEEHPAYLASDEITTVR C#NEEHPAYLA C#NEEHPAYLAS	NA	1	3	NA	0.297788	0.0396362	2
O75179	210	ANKRD17	ANKRD17_C210	ANR17_HUMAN Ankyrin repeat domain-containing protein 17 OS=Homo sapiens OX=9606 GN=ANKRD17 PE=1 SV=3	S	NA	C#ALDEAAAAL	C#ALDEAAAALTR	NA	1	1	NA	0.299216	0.0205156	2
P33992	397	MCM5	MCM5_C397	MCM5_HUMAN DNA replication licensing factor MCM5 OS=Homo sapiens OX=9606 GN=MCM5 PE=1 SV=5	K	NA	C#SPIGVY	C#SPIGVYTSGK	NA	1	1	NA	0.30067	0.00800914	2
Q8NC51	11	SERBP1	SERBP1_C11	PAIRB_HUMAN Plasminogen activator inhibitor 1 RNA-binding protein OS=Homo sapiens OX=9606 GN=SERBP1 PE=1 SV=2	G	NA	C#VVTNR	C#VVTNR	NA	1	1	NA	0.302332	0.273864	2
Q9C0C9	341	UBE2O	UBE2O_C341	UBE2O_HUMAN (E3-independent) E2 ubiquitin-conjugating enzyme OS=Homo sapiens OX=9606 GN=UBE2O PE=1 SV=3	G	NA	C#FDHAQR	C#FDHAQR	NA	1	2	NA	0.305444	0.19764	2
Q9NYP9	115	MIS18A	MIS18A_C115	MS18A_HUMAN Protein Mis18-alpha OS=Homo sapiens OX=9606 GN=MIS18A PE=1 SV=1	S	NA	C#NVSVDK	C#NVSVDK	NA	1	1	NA	0.307511	0.070423	2
Q9UK61	149	TASOR	TASOR_C149	TASOR_HUMAN Protein TASOR OS=Homo sapiens OX=9606 GN=TASOR PE=1 SV=3	A	NA	C#LVHNELLEK	C#LVHNELLEK	NA	1	2	NA	0.310276	0.00521977	2
Q9Y2T2	10	AP3M1	AP3M1_C10	AP3M1_HUMAN AP-3 complex subunit mu-1 OS=Homo sapiens OX=9606 GN=AP3M1 PE=1 SV=1	N	NA	C#SGDIFLEK	C#SGDIFLEK	NA	1	1	NA	0.313614	0.0226244	2
Q8N3C0	208	ASCC3	ASCC3_C208	ASCC3_HUMAN Activating signal cointegrator 1 complex subunit 3 OS=Homo sapiens OX=9606 GN=ASCC3 PE=1 SV=3	A	NA	C#TPELKPVEK	C#TPELKPVEK	NA	1	1	NA	0.314683	0.133617	2
O75179	1746	ANKRD17	ANKRD17_C1746	ANR17_HUMAN Ankyrin repeat domain-containing protein 17 OS=Homo sapiens OX=9606 GN=ANKRD17 PE=1 SV=3	G	NA	C#NINAIR	C#NINAIR	NA	1	1	NA	0.315424	0.176253	2
Q96AG4	59	LRRC59	LRRC59_C59	LRC59_HUMAN Leucine-rich repeat-containing protein 59 OS=Homo sapiens OX=9606 GN=LRRC59 PE=1 SV=1	F	NA	C#GLTHLVK	C#GLTHLVK	NA	1	1	NA	0.317921	0.117301	2
Q8TDN6	115	BRIX1	BRIX1_C115	BRX1_HUMAN Ribosome biogenesis protein BRX1 homolog OS=Homo sapiens OX=9606 GN=BRIX1 PE=1 SV=2	K	NA	C#IYFEAK	C#IYFEAK	NA	2	1	NA	0.35499	0.069457	2
P10155	38	RO60	RO60_C38	RO60_HUMAN 60 kDa SS-A/Ro ribonucleoprotein OS=Homo sapiens OX=9606 GN=RO60 PE=1 SV=2	L	NA	C#FGSEGGTY	C#FGSEGGTYYIK	NA	1	1	NA	0.323437	0.00564177	2
Q99460	787	PSMD1	PSMD1_C787	PSMD1_HUMAN 26S proteasome non-ATPase regulatory subunit 1 OS=Homo sapiens OX=9606 GN=PSMD1 PE=1 SV=2	T	NA	C#VIGLNK	C#VIGLNK	NA	1	2	NA	0.324492	0.259246	2
P54578	359	USP14	USP14_C359	UBP14_HUMAN Ubiquitin carboxyl-terminal hydrolase 14 OS=Homo sapiens OX=9606 GN=USP14 PE=1 SV=3	L	NA	C#TPELQEK	C#TPELQEK	NA	2	1	NA	0.362324	0.0969047	2
Q9UL33	112	TRAPPC2L	TRAPPC2L_C112	TPC2L_HUMAN Trafficking protein particle complex subunit 2-like protein OS=Homo sapiens OX=9606 GN=TRAPPC2L PE=1 SV=1	M	NA	C#NPFYNPGDR	C#NPFYNPGDR	NA	1	2	NA	0.335141	0.173253	2
Q9BTU6	124	PI4K2A	PI4K2A_C124	P4K2A_HUMAN Phosphatidylinositol 4-kinase type 2-alpha OS=Homo sapiens OX=9606 GN=PI4K2A PE=1 SV=1	R	NA	C#IFPER	C#IFPER	NA	1	1	NA	0.337788	0.379093	2
Q9NU22	2030	MDN1	MDN1_C2030	MDN1_HUMAN Midasin OS=Homo sapiens OX=9606 GN=MDN1 PE=1 SV=2	S	NA	C#VPHPSR	C#VPHPSR	NA	1	2	NA	0.341065	0.131215	2
Q92616	1535	GCN1	GCN1_C1535	GCN1_HUMAN eIF-2-alpha kinase activator GCN1 OS=Homo sapiens OX=9606 GN=GCN1 PE=1 SV=6	S	NA	C#LPNIVPK	C#LPNIVPK	NA	2	2	NA	0.353203	0.233964	2
P35249	281	RFC4	RFC4_C281	RFC4_HUMAN Replication factor C subunit 4 OS=Homo sapiens OX=9606 GN=RFC4 PE=1 SV=2	A	NA	C#QSGSFDKL	C#QSGSFDK C#QSGSFDKL	NA	1	3	NA	0.346423	0.130156	2
Q15654	54	TRIP6	TRIP6_C54	TRIP6_HUMAN Thyroid receptor-interacting protein 6 OS=Homo sapiens OX=9606 GN=TRIP6 PE=1 SV=3	Q	NA	C#YQAPGGPEDR	C#YQAPGGPEDR	NA	1	2	NA	0.34653	0.0659108	2
Q9BX10	13	GTPBP2	GTPBP2_C13	GTPB2_HUMAN GTP-binding protein 2 OS=Homo sapiens OX=9606 GN=GTPBP2 PE=1 SV=1	C	NA	C#RPGGGPAVGGTL	C#RPGGGPAVGGTL	NA	1	1	NA	0.348239	0.161329	2
Q8TBC4	237	UBA3	UBA3_C237	UBA3_HUMAN NEDD8-activating enzyme E1 catalytic subunit OS=Homo sapiens OX=9606 GN=UBA3 PE=1 SV=2	M	NA	C#TIASMPR	C#TIASMPR	NA	1	3	NA	0.349206	0.0126995	2
Q92616	1235	GCN1	GCN1_C1235	GCN1_HUMAN eIF-2-alpha kinase activator GCN1 OS=Homo sapiens OX=9606 GN=GCN1 PE=1 SV=6	R	NA	C#GLALALNK	C#GLALALNK	NA	1	2	NA	0.350626	0.142064	2
Q01082	604	SPTBN1	SPTBN1_C604	SPTB2_HUMAN Spectrin beta chain, non-erythrocytic 1 OS=Homo sapiens OX=9606 GN=SPTBN1 PE=1 SV=2	P	NA	C#DPQVIR	C#DPQVIR	NA	1	1	NA	0.356093	0.193695	2
P12268	468	IMPDH2	IMPDH2_C468	IMDH2_HUMAN Inosine-5'-monophosphate dehydrogenase 2 OS=Homo sapiens OX=9606 GN=IMPDH2 PE=1 SV=2	S	NA	C#QDIGAK	C#QDIGAK	NA	1	2	NA	0.356233	0.152281	2
Q15269	508	PWP2	PWP2_C508	PWP2_HUMAN Periodic tryptophan protein 2 homolog OS=Homo sapiens OX=9606 GN=PWP2 PE=2 SV=2	L	NA	C#FNPMK	C#FNPMK	NA	1	2	NA	0.358596	0.262358	2
O60231	625	DHX16	DHX16_C625	DHX16_HUMAN Pre-mRNA-splicing factor ATP-dependent RNA helicase DHX16 OS=Homo sapiens OX=9606 GN=DHX16 PE=1 SV=2	A	NA	C#EMLQDR	C#EMLQDR	NA	1	1	NA	0.362446	0.276386	2
Q9BUK6	485	MSTO1	MSTO1_C485	MSTO1_HUMAN Protein misato homolog 1 OS=Homo sapiens OX=9606 GN=MSTO1 PE=1 SV=1	S	NA	C#SPPGMVLDGSPK	C#SPPGMVLDGSPK	NA	1	1	NA	0.364334	0.00377855	2
Q99873	364	PRMT1	PRMT1_C364	ANM1_HUMAN Protein arginine N-methyltransferase 1 OS=Homo sapiens OX=9606 GN=PRMT1 PE=1 SV=3	S	NA	C#STDYR	C#STDYR	NA	1	1	NA	0.365582	0.180028	2
Q9NVI1	594	FANCI	FANCI_C594	FANCI_HUMAN Fanconi anemia group I protein OS=Homo sapiens OX=9606 GN=FANCI PE=1 SV=4	R	NA	C#LSQQADVR	C#LSQQADVR	NA	1	1	NA	0.36568	0.13619	2
Q9H0F7	22	ARL6	ARL6_C22	ARL6_HUMAN ADP-ribosylation factor-like protein 6 OS=Homo sapiens OX=9606 GN=ARL6 PE=1 SV=1	L	NA	C#LGLDNSGK	C#LGLDNSGK	NA	1	1	NA	0.366685	0.169933	2
A6NDG6	35	PGP	PGP_C35	PGP_HUMAN Glycerol-3-phosphate phosphatase OS=Homo sapiens OX=9606 GN=PGP PE=1 SV=1	D	NA	C#DGVLWR	C#DGVLWR	NA	1	1	NA	0.372819	0.102025	2
P29372	61	MPG	MPG_C61	3MG_HUMAN DNA-3-methyladenine glycosylase OS=Homo sapiens OX=9606 GN=MPG PE=1 SV=3	R	NA	C#LGPPTTPGPYR	C#LGPPTTPGPYR	NA	1	1	NA	0.373304	0.0468898	2
Q01469	120	FABP5	FABP5_C120	FABP5_HUMAN Fatty acid-binding protein 5 OS=Homo sapiens OX=9606 GN=FABP5 PE=1 SV=3	E	NA	C#VMNNVT	C#VMNNVTCTR	NA	1	2	NA	0.374521	0.187345	2
Q15020	729	SART3	SART3_C729	SART3_HUMAN Squamous cell carcinoma antigen recognized by T-cells 3 OS=Homo sapiens OX=9606 GN=SART3 PE=1 SV=1	A	NA	C#GEVVQIR	C#GEVVQIR	NA	1	1	NA	0.374718	0.0721	2
Q14789	1811	GOLGB1	GOLGB1_C1811	GOGB1_HUMAN Golgin subfamily B member 1 OS=Homo sapiens OX=9606 GN=GOLGB1 PE=1 SV=2	T	NA	C#SESVPSAK	C#SESVPSAK	NA	1	1	NA	0.377766	0.00543303	2
Q9BQ39	417	DDX50	DDX50_C417	DDX50_HUMAN ATP-dependent RNA helicase DDX50 OS=Homo sapiens OX=9606 GN=DDX50 PE=1 SV=1	Q	NA	C#LHGDIA	C#LHGDIAQSQ	NA	1	1	NA	0.389043	0.0199894	2
P50990	430	CCT8	CCT8_C430	TCPQ_HUMAN T-complex protein 1 subunit theta OS=Homo sapiens OX=9606 GN=CCT8 PE=1 SV=4	T	NA	C#PGLEQY	C#PGLEQYAIK	NA	1	1	NA	0.392886	0.0266854	2
O75717	716	WDHD1	WDHD1_C716	WDHD1_HUMAN WD repeat and HMG-box DNA-binding protein 1 OS=Homo sapiens OX=9606 GN=WDHD1 PE=1 SV=1	Y	NA	C#QIATEK	C#QIATEK	NA	1	1	NA	0.395358	0.116732	2
Q9BY44	80	EIF2A	EIF2A_C80	EIF2A_HUMAN Eukaryotic translation initiation factor 2A OS=Homo sapiens OX=9606 GN=EIF2A PE=1 SV=3	V	NA	C#LEFSPK	C#LEFSPK	NA	1	1	NA	0.398104	0.203191	2
P42704	208	LRPPRC	LRPPRC_C208	LPPRC_HUMAN Leucine-rich PPR motif-containing protein, mitochondrial OS=Homo sapiens OX=9606 GN=LRPPRC PE=1 SV=3	Y	NA	C#NVGDIEGASK	C#NVGDIEGASK	NA	1	1	NA	0.40114	0.000950103	2
Q00341	878	HDLBP	HDLBP_C878	VIGLN_HUMAN Vigilin OS=Homo sapiens OX=9606 GN=HDLBP PE=1 SV=2	E	NA	C#AIPQK	C#AIPQK	NA	1	1	NA	0.403331	0.114079	2
Q9ULC4	144	MCTS1	MCTS1_C144	MCTS1_HUMAN Malignant T-cell-amplified sequence 1 OS=Homo sapiens OX=9606 GN=MCTS1 PE=1 SV=1	L	NA	C#VGVMK	C#VGVMK	NA	1	1	NA	0.407255	0.115672	2
Q16204	27	CCDC6	CCDC6_C27	CCDC6_HUMAN Coiled-coil domain-containing protein 6 OS=Homo sapiens OX=9606 GN=CCDC6 PE=1 SV=2	S	C#SSTSGGGGGGGGGGGGGK	NA	NA	1	NA	NA	0.000175333	NA	NA	1
Q9Y450	469	HBS1L	HBS1L_C469	HBS1L_HUMAN HBS1-like protein OS=Homo sapiens OX=9606 GN=HBS1L PE=1 SV=1	L	C#LLEQIDSFKPPQR	NA	NA	1	NA	NA	0.00652829	NA	NA	1
O00567	112	NOP56	NOP56_C112	NOP56_HUMAN Nucleolar protein 56 OS=Homo sapiens OX=9606 GN=NOP56 PE=1 SV=4	N	C#QTGGVIAEILR	NA	NA	1	NA	NA	0.00930965	NA	NA	1
Q9UHR5	127	SAP30BP	SAP30BP_C127	S30BP_HUMAN SAP30-binding protein OS=Homo sapiens OX=9606 GN=SAP30BP PE=1 SV=1	R	C#SNHLQDK	NA	NA	2	NA	NA	0.161444	NA	NA	1
Q8N142	63	ADSSL1	ADSSL1_C63	PURA1_HUMAN Adenylosuccinate synthetase isozyme 1 OS=Homo sapiens OX=9606 GN=ADSSL1 PE=1 SV=1	R	C#QGGNNAGHTV C#QGGNNAGH	NA	NA	2	NA	NA	0.0523864	NA	NA	1
P61247	201	RPS3A	RPS3A_C201	RS3A_HUMAN 40S ribosomal protein S3a OS=Homo sapiens OX=9606 GN=RPS3A PE=1 SV=2	A	C#QSIYPLHDVFVR	NA	NA	1	NA	NA	0.0214506	NA	NA	1
P33992	197	MCM5	MCM5_C197	MCM5_HUMAN DNA replication licensing factor MCM5 OS=Homo sapiens OX=9606 GN=MCM5 PE=1 SV=5	K	C#NTDQAGRPK	NA	NA	2	NA	NA	0.0361718	NA	NA	1
Q15050	52	RRS1	RRS1_C52	RRS1_HUMAN Ribosome biogenesis regulatory protein homolog OS=Homo sapiens OX=9606 GN=RRS1 PE=1 SV=2	R	C#AGPTPEAELQ	NA	NA	1	NA	NA	0.0281597	NA	NA	1
Q96J02	57	ITCH	ITCH_C57	ITCH_HUMAN E3 ubiquitin-protein ligase Itchy homolog OS=Homo sapiens OX=9606 GN=ITCH PE=1 SV=2	K	C#NNTNSPK	NA	NA	1	NA	NA	0.0348493	NA	NA	1
Q9H9S3	13	SEC61A2	SEC61A2_C13	S61A2_HUMAN Protein transport protein Sec61 subunit alpha isoform 2 OS=Homo sapiens OX=9606 GN=SEC61A2 PE=2 SV=3	F	C#AVLPEIQKPER	NA	NA	1	NA	NA	0.0356681	NA	NA	1
P23378	757	GLDC	GLDC_C757	GCSP_HUMAN Glycine dehydrogenase (decarboxylating), mitochondrial OS=Homo sapiens OX=9606 GN=GLDC PE=1 SV=2	F	C#IPHGGGGPGMGPIGVK	NA	NA	1	NA	NA	0.0377503	NA	NA	1
O75131	506	CPNE3	CPNE3_C506	CPNE3_HUMAN Copine-3 OS=Homo sapiens OX=9606 GN=CPNE3 PE=1 SV=1	Q	C#VLAEIPQQVVGY C#VLAEIPQ	NA	NA	2	NA	NA	0.139491	NA	NA	1
Q9Y2D5	296	AKAP2	AKAP2_C296	AKAP2_HUMAN A-kinase anchor protein 2 OS=Homo sapiens OX=9606 GN=AKAP2 PE=1 SV=3	L	C#TAPASSHER	NA	NA	1	NA	NA	0.0428736	NA	NA	1
Q92841	277	DDX17	DDX17_C277	DDX17_HUMAN Probable ATP-dependent RNA helicase DDX17 OS=Homo sapiens OX=9606 GN=DDX17 PE=1 SV=2	T	C#IYGGAPK	NA	NA	3	NA	NA	0.0981944	NA	NA	1
P35579	172	MYH9	MYH9_C172	MYH9_HUMAN Myosin-9 OS=Homo sapiens OX=9606 GN=MYH9 PE=1 SV=4	L	C#TGESGAGK	NA	NA	1	NA	NA	0.0504105	NA	NA	1
O15226	424	NKRF	NKRF_C424	NKRF_HUMAN NF-kappa-B-repressing factor OS=Homo sapiens OX=9606 GN=NKRF PE=1 SV=2	Q	C#HTGSSPR	NA	NA	2	NA	NA	0.0664132	NA	NA	1
Q8TDX7	53	NEK7	NEK7_C53	NEK7_HUMAN Serine/threonine-protein kinase Nek7 OS=Homo sapiens OX=9606 GN=NEK7 PE=1 SV=1	A	C#LLDGVPVALK	NA	NA	1	NA	NA	0.0539529	NA	NA	1
Q15120	191	PDK3	PDK3_C191	PDK3_HUMAN [Pyruvate dehydrogenase (acetyl-transferring)] kinase isozyme 3, mitochondrial OS=Homo sapiens OX=9606 GN=PDK3 PE=1 SV=1	T	C#NVADVVK	NA	NA	1	NA	NA	0.0594365	NA	NA	1
Q9Y2X8	111	UBE2D4	UBE2D4_C111	UB2D4_HUMAN Ubiquitin-conjugating enzyme E2 D4 OS=Homo sapiens OX=9606 GN=UBE2D4 PE=1 SV=1	L	C#DPNPDDPLVPEIA	NA	NA	1	NA	NA	0.0650006	NA	NA	1
O60870	45	KIN	KIN_C45	KIN17_HUMAN DNA/RNA-binding protein KIN17 OS=Homo sapiens OX=9606 GN=KIN PE=1 SV=2	H	C#MSESHQR	NA	NA	3	NA	NA	0.172734	NA	NA	1
P55884	420	EIF3B	EIF3B_C420	EIF3B_HUMAN Eukaryotic translation initiation factor 3 subunit B OS=Homo sapiens OX=9606 GN=EIF3B PE=1 SV=3	H	C#ESSAHWPIFK	NA	NA	2	NA	NA	0.0945232	NA	NA	1
Q16891	603	IMMT	IMMT_C603	MIC60_HUMAN MICOS complex subunit MIC60 OS=Homo sapiens OX=9606 GN=IMMT PE=1 SV=1	N	C#SDNEFTQAL	NA	NA	1	NA	NA	0.0731601	NA	NA	1
P19623	89	SRM	SRM_C89	SPEE_HUMAN Spermidine synthase OS=Homo sapiens OX=9606 GN=SRM PE=1 SV=1	L	C#SHPNPR	NA	NA	3	NA	NA	0.155547	NA	NA	1
P15924	3	DSP	DSP_C3	DESP_HUMAN Desmoplakin OS=Homo sapiens OX=9606 GN=DSP PE=1 SV=3	S	C#NGGSHPR	NA	NA	1	NA	NA	0.0825367	NA	NA	1
O43432	638	EIF4G3	EIF4G3_C638	IF4G3_HUMAN Eukaryotic translation initiation factor 4 gamma 3 OS=Homo sapiens OX=9606 GN=EIF4G3 PE=1 SV=2	A	C#IQKPEGLPPISDVVLDK	NA	NA	1	NA	NA	0.0837533	NA	NA	1
Q9UIC8	136	LCMT1	LCMT1_C136	LCMT1_HUMAN Leucine carboxyl methyltransferase 1 OS=Homo sapiens OX=9606 GN=LCMT1 PE=1 SV=2	K	C#KPPLSSPILELH	NA	NA	1	NA	NA	0.0840908	NA	NA	1
Q15424	309	SAFB	SAFB_C309	SAFB1_HUMAN Scaffold attachment factor B1 OS=Homo sapiens OX=9606 GN=SAFB PE=1 SV=4	D	C#EPVGLEPAVEQS	NA	NA	1	NA	NA	0.0855619	NA	NA	1
O15067	270	PFAS	PFAS_C270	PUR4_HUMAN Phosphoribosylformylglycinamidine synthase OS=Homo sapiens OX=9606 GN=PFAS PE=1 SV=4	F	C#DNSSAIQGK	NA	NA	1	NA	NA	0.0891791	NA	NA	1
P35579	931	MYH9	MYH9_C931	MYH9_HUMAN Myosin-9 OS=Homo sapiens OX=9606 GN=MYH9 PE=1 SV=4	R	C#QHLQAEK	NA	NA	1	NA	NA	0.091602	NA	NA	1
Q96FZ2	131	HMCES	HMCES_C131	HMCES_HUMAN Abasic site processing protein HMCES OS=Homo sapiens OX=9606 GN=HMCES PE=1 SV=1	R	C#QGTNQR	NA	NA	2	NA	NA	0.138295	NA	NA	1
O00267	740	SUPT5H	SUPT5H_C740	SPT5H_HUMAN Transcription elongation factor SPT5 OS=Homo sapiens OX=9606 GN=SUPT5H PE=1 SV=1	T	C#QTISVDR	NA	NA	1	NA	NA	0.109925	NA	NA	1
Q6PKG0	1054	LARP1	LARP1_C1054	LARP1_HUMAN La-related protein 1 OS=Homo sapiens OX=9606 GN=LARP1 PE=1 SV=2	R	C#PSQSSSR	NA	NA	1	NA	NA	0.118697	NA	NA	1
Q9H9B4	190	SFXN1	SFXN1_C190	SFXN1_HUMAN Sideroflexin-1 OS=Homo sapiens OX=9606 GN=SFXN1 PE=1 SV=4	N	C#INIPLMR	NA	NA	2	NA	NA	0.237069	NA	NA	1
Q86WB0	190	ZC3HC1	ZC3HC1_C190	NIPA_HUMAN Nuclear-interacting partner of ALK OS=Homo sapiens OX=9606 GN=ZC3HC1 PE=1 SV=1	L	C#HLDLQLPSLRPEDLK	NA	NA	2	NA	NA	0.135521	NA	NA	1
P29966	310	MARCKS	MARCKS_C310	MARCS_HUMAN Myristoylated alanine-rich C-kinase substrate OS=Homo sapiens OX=9606 GN=MARCKS PE=1 SV=4	A	C#AAPSQEAQPE	NA	NA	1	NA	NA	0.133991	NA	NA	1
P22314	340	UBA1	UBA1_C340	UBA1_HUMAN Ubiquitin-like modifier-activating enzyme 1 OS=Homo sapiens OX=9606 GN=UBA1 PE=1 SV=3	F	C#AQHGRPPR	NA	NA	1	NA	NA	0.139763	NA	NA	1
Q5T200	1643	ZC3H13	ZC3H13_C1643	ZC3HD_HUMAN Zinc finger CCCH domain-containing protein 13 OS=Homo sapiens OX=9606 GN=ZC3H13 PE=1 SV=1	T	C#HAPGHEK	NA	NA	1	NA	NA	0.141114	NA	NA	1
Q14232	169	EIF2B1	EIF2B1_C169	EI2BA_HUMAN Translation initiation factor eIF-2B subunit alpha OS=Homo sapiens OX=9606 GN=EIF2B1 PE=1 SV=1	L	C#HLNVPVTVVL	NA	NA	1	NA	NA	0.14132	NA	NA	1
Q16531	363	DDB1	DDB1_C363	DDB1_HUMAN DNA damage-binding protein 1 OS=Homo sapiens OX=9606 GN=DDB1 PE=1 SV=1	M	C#VVDLER	NA	NA	2	NA	NA	0.18821	NA	NA	1
Q9BQA1	172	WDR77	WDR77_C172	MEP50_HUMAN Methylosome protein 50 OS=Homo sapiens OX=9606 GN=WDR77 PE=1 SV=1	T	C#VAASPHK	NA	NA	1	NA	NA	0.147421	NA	NA	1
Q96CB9	181	NSUN4	NSUN4_C181	NSUN4_HUMAN 5-methylcytosine rRNA methyltransferase NSUN4 OS=Homo sapiens OX=9606 GN=NSUN4 PE=1 SV=2	L	C#AAPGGK	NA	NA	1	NA	NA	0.150433	NA	NA	1
P68371	129	TUBB4B	TUBB4B_C129	TBB4B_HUMAN Tubulin beta-4B chain OS=Homo sapiens OX=9606 GN=TUBB4B PE=1 SV=1	D	C#LQGFQLTH	NA	NA	1	NA	NA	0.151778	NA	NA	1
P35579	694	MYH9	MYH9_C694	MYH9_HUMAN Myosin-9 OS=Homo sapiens OX=9606 GN=MYH9 PE=1 SV=4	R	C#NGVLEGIR	NA	NA	1	NA	NA	0.154534	NA	NA	1
Q9UIG0	338	BAZ1B	BAZ1B_C338	BAZ1B_HUMAN Tyrosine-protein kinase BAZ1B OS=Homo sapiens OX=9606 GN=BAZ1B PE=1 SV=2	W	C#HVHLK	NA	NA	1	NA	NA	0.158144	NA	NA	1
P16615	498	ATP2A2	ATP2A2_C498	AT2A2_HUMAN Sarcoplasmic/endoplasmic reticulum calcium ATPase 2 OS=Homo sapiens OX=9606 GN=ATP2A2 PE=1 SV=1	Y	C#TPNKPSR	NA	NA	2	NA	NA	0.164137	NA	NA	1
Q9BTY7	163	HGH1	HGH1_C163	HGH1_HUMAN Protein HGH1 homolog OS=Homo sapiens OX=9606 GN=HGH1 PE=1 SV=1	L	C#TPGYNAR	NA	NA	1	NA	NA	0.163328	NA	NA	1
Q92793	1486	CREBBP	CREBBP_C1486	CBP_HUMAN CREB-binding protein OS=Homo sapiens OX=9606 GN=CREBBP PE=1 SV=3	H	C#HPPDQK	NA	NA	1	NA	NA	0.164449	NA	NA	1
Q70IA6	208	MOB2	MOB2_C208	MOB2_HUMAN MOB kinase activator 2 OS=Homo sapiens OX=9606 GN=MOB2 PE=1 SV=1	L	C#SGAGGVH	NA	NA	1	NA	NA	0.166621	NA	NA	1
Q15005	26	SPCS2	SPCS2_C26	SPCS2_HUMAN Signal peptidase complex subunit 2 OS=Homo sapiens OX=9606 GN=SPCS2 PE=1 SV=3	N	C#GTGSGR	NA	NA	1	NA	NA	0.1675	NA	NA	1
Q71UM5	64	RPS27L	RPS27L_C64	RS27L_HUMAN 40S ribosomal protein S27-like OS=Homo sapiens OX=9606 GN=RPS27L PE=1 SV=3	L	C#QPTGGK	NA	NA	2	NA	NA	0.231202	NA	NA	1
P84243	111	H3F3A	H3F3A_C111	H33_HUMAN Histone H3.3 OS=Homo sapiens OX=9606 GN=H3F3A PE=1 SV=2	L	C#AIHAK	NA	NA	2	NA	NA	0.191466	NA	NA	1
O15226	37	NKRF	NKRF_C37	NKRF_HUMAN NF-kappa-B-repressing factor OS=Homo sapiens OX=9606 GN=NKRF PE=1 SV=2	T	C#DGQNPPKK	NA	NA	2	NA	NA	0.230275	NA	NA	1
Q9UJV9	585	DDX41	DDX41_C585	DDX41_HUMAN Probable ATP-dependent RNA helicase DDX41 OS=Homo sapiens OX=9606 GN=DDX41 PE=1 SV=2	F	C#GGLGHR	NA	NA	1	NA	NA	0.190596	NA	NA	1
O75691	2537	UTP20	UTP20_C2537	UTP20_HUMAN Small subunit processome component 20 homolog OS=Homo sapiens OX=9606 GN=UTP20 PE=1 SV=3	S	C#HQLHSK	NA	NA	1	NA	NA	0.193498	NA	NA	1
Q9GZN8	106	C20orf27	C20orf27_C106	CT027_HUMAN UPF0687 protein C20orf27 OS=Homo sapiens OX=9606 GN=C20orf27 PE=1 SV=3	K	C#EYSAHK	NA	NA	1	NA	NA	0.194718	NA	NA	1
Q93009	961	USP7	USP7_C961	UBP7_HUMAN Ubiquitin carboxyl-terminal hydrolase 7 OS=Homo sapiens OX=9606 GN=USP7 PE=1 SV=2	E	C#LSPATSR	NA	NA	1	NA	NA	0.200564	NA	NA	1
O75319	199	DUSP11	DUSP11_C199	DUS11_HUMAN RNA/RNP complex-1-interacting phosphatase OS=Homo sapiens OX=9606 GN=DUSP11 PE=1 SV=2	H	C#THGLNR	NA	NA	1	NA	NA	0.205353	NA	NA	1
P78316	580	NOP14	NOP14_C580	NOP14_HUMAN Nucleolar protein 14 OS=Homo sapiens OX=9606 GN=NOP14 PE=1 SV=3	K	C#PILSLQDVVK	NA	NA	1	NA	NA	0.206022	NA	NA	1
Q6IQ49	160	SDE2	SDE2_C160	SDE2_HUMAN Replication stress response regulator SDE2 OS=Homo sapiens OX=9606 GN=SDE2 PE=1 SV=1	Q	C#HEMAER	NA	NA	1	NA	NA	0.208624	NA	NA	1
P52789	813	HK2	HK2_C813	HXK2_HUMAN Hexokinase-2 OS=Homo sapiens OX=9606 GN=HK2 PE=1 SV=2	T	C#DDSIIVK	NA	NA	2	NA	NA	0.26739	NA	NA	1
P60981	39	DSTN	DSTN_C39	DEST_HUMAN Destrin OS=Homo sapiens OX=9606 GN=DSTN PE=1 SV=3	F	C#LSADK C#LSADKK	NA	NA	2	NA	NA	0.226739	NA	NA	1
Q01831	377	XPC	XPC_C377	XPC_HUMAN DNA repair protein complementing XP-C cells OS=Homo sapiens OX=9606 GN=XPC PE=1 SV=4	T	C#RPSAK	NA	NA	1	NA	NA	0.214396	NA	NA	1
O60884	146	DNAJA2	DNAJA2_C146	DNJA2_HUMAN DnaJ homolog subfamily A member 2 OS=Homo sapiens OX=9606 GN=DNAJA2 PE=1 SV=1	A	C#SGQGGK	NA	NA	1	NA	NA	0.215075	NA	NA	1
P38646	317	HSPA9	HSPA9_C317	GRP75_HUMAN Stress-70 protein, mitochondrial OS=Homo sapiens OX=9606 GN=HSPA9 PE=1 SV=2	K	C#ELSSSVQ	NA	NA	1	NA	NA	0.220247	NA	NA	1
Q16718	17	NDUFA5	NDUFA5_C17	NDUA5_HUMAN NADH dehydrogenase [ubiquinone] 1 alpha subcomplex subunit 5 OS=Homo sapiens OX=9606 GN=NDUFA5 PE=1 SV=3	V	C#NTPHER	NA	NA	2	NA	NA	0.25337	NA	NA	1
Q08J23	502	NSUN2	NSUN2_C502	NSUN2_HUMAN tRNA (cytosine(34)-C(5))-methyltransferase OS=Homo sapiens OX=9606 GN=NSUN2 PE=1 SV=2	V	C#GPPPSK	NA	NA	3	NA	NA	0.233757	NA	NA	1
Q7Z6Z7	699	HUWE1	HUWE1_C699	HUWE1_HUMAN E3 ubiquitin-protein ligase HUWE1 OS=Homo sapiens OX=9606 GN=HUWE1 PE=1 SV=3	I	C#QKPSIQ	NA	NA	1	NA	NA	0.229476	NA	NA	1
P13489	409	RNH1	RNH1_C409	RINI_HUMAN Ribonuclease inhibitor OS=Homo sapiens OX=9606 GN=RNH1 PE=1 SV=2	N	C#LGDAGILQ	NA	NA	2	NA	NA	0.285034	NA	NA	1
Q14676	26	MDC1	MDC1_C26	MDC1_HUMAN Mediator of DNA damage checkpoint protein 1 OS=Homo sapiens OX=9606 GN=MDC1 PE=1 SV=3	R	C#NVEPVGR	NA	NA	1	NA	NA	0.233144	NA	NA	1
A5YKK6	1932	CNOT1	CNOT1_C1932	CNOT1_HUMAN CCR4-NOT transcription complex subunit 1 OS=Homo sapiens OX=9606 GN=CNOT1 PE=1 SV=2	K	C#YHNLDAFVR	NA	NA	1	NA	NA	0.233527	NA	NA	1
P04637	176	TP53	TP53_C176	P53_HUMAN Cellular tumor antigen p53 OS=Homo sapiens OX=9606 GN=TP53 PE=1 SV=4	R	C#PHHER	NA	NA	1	NA	NA	0.2379	NA	NA	1
Q5SW79	967	CEP170	CEP170_C967	CE170_HUMAN Centrosomal protein of 170 kDa OS=Homo sapiens OX=9606 GN=CEP170 PE=1 SV=1	R	C#STGSPSK	NA	NA	1	NA	NA	0.238413	NA	NA	1
Q9HAV4	10	XPO5	XPO5_C10	XPO5_HUMAN Exportin-5 OS=Homo sapiens OX=9606 GN=XPO5 PE=1 SV=1	L	C#EQLVK	NA	NA	1	NA	NA	0.250672	NA	NA	1
P43250	71	GRK6	GRK6_C71	GRK6_HUMAN G protein-coupled receptor kinase 6 OS=Homo sapiens OX=9606 GN=GRK6 PE=1 SV=2	F	C#ATRPELSR	NA	NA	1	NA	NA	0.251624	NA	NA	1
Q9H0S4	273	DDX47	DDX47_C273	DDX47_HUMAN Probable ATP-dependent RNA helicase DDX47 OS=Homo sapiens OX=9606 GN=DDX47 PE=1 SV=1	T	C#NNTQR	NA	NA	1	NA	NA	0.251803	NA	NA	1
Q99733	77	NAP1L4	NAP1L4_C77	NP1L4_HUMAN Nucleosome assembly protein 1-like 4 OS=Homo sapiens OX=9606 GN=NAP1L4 PE=1 SV=1	R	C#AHIEAK	NA	NA	2	NA	NA	0.2946	NA	NA	1
P35573	652	AGL	AGL_C652	GDE_HUMAN Glycogen debranching enzyme OS=Homo sapiens OX=9606 GN=AGL PE=1 SV=3	C	C#ASGSTR	NA	NA	1	NA	NA	0.254805	NA	NA	1
Q9Y265	49	RUVBL1	RUVBL1_C49	RUVB1_HUMAN RuvB-like 1 OS=Homo sapiens OX=9606 GN=RUVBL1 PE=1 SV=1	A	C#GVIVELIK	NA	NA	1	NA	NA	0.255534	NA	NA	1
P0DJJ0	370	SRGAP2C	SRGAP2C_C370	SRG2C_HUMAN SLIT-ROBO Rho GTPase-activating protein 2C OS=Homo sapiens OX=9606 GN=SRGAP2C PE=1 SV=1	R	C#QQLQSR	NA	NA	1	NA	NA	0.26235	NA	NA	1
Q96RE7	156	NACC1	NACC1_C156	NACC1_HUMAN Nucleus accumbens-associated protein 1 OS=Homo sapiens OX=9606 GN=NACC1 PE=1 SV=1	A	C#STPLPLVS	NA	NA	1	NA	NA	0.264983	NA	NA	1
Q9BQG0	614	MYBBP1A	MYBBP1A_C614	MBB1A_HUMAN Myb-binding protein 1A OS=Homo sapiens OX=9606 GN=MYBBP1A PE=1 SV=2	S	C#DLLGDIQ	NA	NA	1	NA	NA	0.26579	NA	NA	1
Q6UB35	61	MTHFD1L	MTHFD1L_C61	C1TM_HUMAN Monofunctional C1-tetrahydrofolate synthase, mitochondrial OS=Homo sapiens OX=9606 GN=MTHFD1L PE=1 SV=1	S	C#SPGGR	NA	NA	1	NA	NA	0.268879	NA	NA	1
P63220	17	RPS21	RPS21_C17	RS21_HUMAN 40S ribosomal protein S21 OS=Homo sapiens OX=9606 GN=RPS21 PE=1 SV=1	K	C#SASNR	NA	NA	1	NA	NA	0.269832	NA	NA	1
P43897	123	TSFM	TSFM_C123	EFTS_HUMAN Elongation factor Ts, mitochondrial OS=Homo sapiens OX=9606 GN=TSFM PE=1 SV=2	N	C#ETDFVSR	NA	NA	2	NA	NA	0.275068	NA	NA	1
Q9BQ52	441	ELAC2	ELAC2_C441	RNZ2_HUMAN Zinc phosphodiesterase ELAC protein 2 OS=Homo sapiens OX=9606 GN=ELAC2 PE=1 SV=2	T	C#NPEEFIVE	NA	NA	2	NA	NA	0.29503	NA	NA	1
P58546	45	MTPN	MTPN_C45	MTPN_HUMAN Myotrophin OS=Homo sapiens OX=9606 GN=MTPN PE=1 SV=2	D	C#GQLEIL	NA	NA	1	NA	NA	0.280489	NA	NA	1
O15020	115	SPTBN2	SPTBN2_C115	SPTN2_HUMAN Spectrin beta chain, non-erythrocytic 2 OS=Homo sapiens OX=9606 GN=SPTBN2 PE=1 SV=3	H	C#LENVDK	NA	NA	1	NA	NA	0.281171	NA	NA	1
Q9UEW8	99	STK39	STK39_C99	STK39_HUMAN STE20/SPS1-related proline-alanine-rich protein kinase OS=Homo sapiens OX=9606 GN=STK39 PE=1 SV=3	K	C#QTSMDELLK	NA	NA	1	NA	NA	0.281597	NA	NA	1
Q9Y2I8	330	WDR37	WDR37_C330	WDR37_HUMAN WD repeat-containing protein 37 OS=Homo sapiens OX=9606 GN=WDR37 PE=1 SV=2	C	C#THPTQR	NA	NA	1	NA	NA	0.282582	NA	NA	1
Q9UGN5	165	PARP2	PARP2_C165	PARP2_HUMAN Poly [ADP-ribose] polymerase 2 OS=Homo sapiens OX=9606 GN=PARP2 PE=1 SV=2	A	C#SGNLNK	NA	NA	1	NA	NA	0.283034	NA	NA	1
P60059	25	SEC61G	SEC61G_C25	SC61G_HUMAN Protein transport protein Sec61 subunit gamma OS=Homo sapiens OX=9606 GN=SEC61G PE=1 SV=1	R	C#TKPDR	NA	NA	1	NA	NA	0.284147	NA	NA	1
P68104	31	EEF1A1	EEF1A1_C31	EF1A1_HUMAN Elongation factor 1-alpha 1 OS=Homo sapiens OX=9606 GN=EEF1A1 PE=1 SV=1	K	C#GGIDKR	NA	NA	2	NA	NA	0.295498	NA	NA	1
Q13618	636	CUL3	CUL3_C636	CUL3_HUMAN Cullin-3 OS=Homo sapiens OX=9606 GN=CUL3 PE=1 SV=2	A	C#GKPTQR	NA	NA	1	NA	NA	0.298757	NA	NA	1
Q9NVN8	490	GNL3L	GNL3L_C490	GNL3L_HUMAN Guanine nucleotide-binding protein-like 3-like protein OS=Homo sapiens OX=9606 GN=GNL3L PE=1 SV=1	Y	C#TNPNR	NA	NA	1	NA	NA	0.302899	NA	NA	1
P45880	210	VDAC2	VDAC2_C210	VDAC2_HUMAN Voltage-dependent anion-selective channel protein 2 OS=Homo sapiens OX=9606 GN=VDAC2 PE=1 SV=2	V	C#EDLDTSVNLA	NA	NA	1	NA	NA	0.30412	NA	NA	1
Q5H9R7	431	PPP6R3	PPP6R3_C431	PP6R3_HUMAN Serine/threonine-protein phosphatase 6 regulatory subunit 3 OS=Homo sapiens OX=9606 GN=PPP6R3 PE=1 SV=2	K	C#QLIER	NA	NA	1	NA	NA	0.305798	NA	NA	1
P21333	53	FLNA	FLNA_C53	FLNA_HUMAN Filamin-A OS=Homo sapiens OX=9606 GN=FLNA PE=1 SV=4	W	C#NEHLK	NA	NA	1	NA	NA	0.308115	NA	NA	1
Q86SQ7	649	SDCCAG8	SDCCAG8_C649	SDCG8_HUMAN Serologically defined colon cancer antigen 8 OS=Homo sapiens OX=9606 GN=SDCCAG8 PE=1 SV=1	Q	C#VQHGR	NA	NA	1	NA	NA	0.309533	NA	NA	1
O43502	68	RAD51C	RAD51C_C68	RA51C_HUMAN DNA repair protein RAD51 homolog 3 OS=Homo sapiens OX=9606 GN=RAD51C PE=1 SV=1	E	C#LTNKPR	NA	NA	1	NA	NA	0.312246	NA	NA	1
P49790	874	NUP153	NUP153_C874	NU153_HUMAN Nuclear pore complex protein Nup153 OS=Homo sapiens OX=9606 GN=NUP153 PE=1 SV=2	A	C#ESAKPGTK	NA	NA	2	NA	NA	0.337336	NA	NA	1
Q8WVV9	189	HNRNPLL	HNRNPLL_C189	HNRLL_HUMAN Heterogeneous nuclear ribonucleoprotein L-like OS=Homo sapiens OX=9606 GN=HNRNPLL PE=1 SV=1	V	C#NPVGK	NA	NA	1	NA	NA	0.326762	NA	NA	1
Q00610	328	CLTC	CLTC_C328	CLH1_HUMAN Clathrin heavy chain 1 OS=Homo sapiens OX=9606 GN=CLTC PE=1 SV=5	V	C#VEEENIIPY	NA	NA	1	NA	NA	0.327236	NA	NA	1
Q14690	802	PDCD11	PDCD11_C802	RRP5_HUMAN Protein RRP5 homolog OS=Homo sapiens OX=9606 GN=PDCD11 PE=1 SV=3	D	C#GLGDLAIT	NA	NA	1	NA	NA	0.329759	NA	NA	1
Q8WYQ5	91	DGCR8	DGCR8_C91	DGCR8_HUMAN Microprocessor complex subunit DGCR8 OS=Homo sapiens OX=9606 GN=DGCR8 PE=1 SV=1	N	C#SGHSPR	NA	NA	2	NA	NA	0.35155	NA	NA	1
Q92833	206	JARID2	JARID2_C206	JARD2_HUMAN Protein Jumonji OS=Homo sapiens OX=9606 GN=JARID2 PE=1 SV=2	S	C#QSTPR	NA	NA	1	NA	NA	0.333755	NA	NA	1
Q9H832	154	UBE2Z	UBE2Z_C154	UBE2Z_HUMAN Ubiquitin-conjugating enzyme E2 Z OS=Homo sapiens OX=9606 GN=UBE2Z PE=1 SV=2	R	C#PPDYPIHPPR	NA	NA	1	NA	NA	0.334367	NA	NA	1
P13804	53	ETFA	ETFA_C53	ETFA_HUMAN Electron transfer flavoprotein subunit alpha, mitochondrial OS=Homo sapiens OX=9606 GN=ETFA PE=1 SV=1	S	C#LVAGTK	NA	NA	1	NA	NA	0.335885	NA	NA	1
Q86WX3	104	RPS19BP1	RPS19BP1_C104	AROS_HUMAN Active regulator of SIRT1 OS=Homo sapiens OX=9606 GN=RPS19BP1 PE=1 SV=1	A	C#DRPVAK	NA	NA	1	NA	NA	0.335887	NA	NA	1
P46782	172	RPS5	RPS5_C172	RS5_HUMAN 40S ribosomal protein S5 OS=Homo sapiens OX=9606 GN=RPS5 PE=1 SV=4	E	C#LADELINAA	NA	NA	1	NA	NA	0.338733	NA	NA	1
Q9NTK5	75	OLA1	OLA1_C75	OLA1_HUMAN Obg-like ATPase 1 OS=Homo sapiens OX=9606 GN=OLA1 PE=1 SV=2	L	C#QYHKPASK	NA	NA	1	NA	NA	0.338908	NA	NA	1
Q92841	247	DDX17	DDX17_C247	DDX17_HUMAN Probable ATP-dependent RNA helicase DDX17 OS=Homo sapiens OX=9606 GN=DDX17 PE=1 SV=2	I	C#LVLAPTR	NA	NA	1	NA	NA	0.339029	NA	NA	1
Q8NFP7	3	NUDT10	NUDT10_C3	NUD10_HUMAN Diphosphoinositol polyphosphate phosphohydrolase 3-alpha OS=Homo sapiens OX=9606 GN=NUDT10 PE=1 SV=1	K	C#KPNQTR	NA	NA	1	NA	NA	0.339116	NA	NA	1
Q06124	318	PTPN11	PTPN11_C318	PTN11_HUMAN Tyrosine-protein phosphatase non-receptor type 11 OS=Homo sapiens OX=9606 GN=PTPN11 PE=1 SV=2	K	C#NNSKPK	NA	NA	2	NA	NA	0.353594	NA	NA	1
Q99829	99	CPNE1	CPNE1_C99	CPNE1_HUMAN Copine-1 OS=Homo sapiens OX=9606 GN=CPNE1 PE=1 SV=1	E	C#SLGQIV	NA	NA	1	NA	NA	0.346025	NA	NA	1
O95352	406	ATG7	ATG7_C406	ATG7_HUMAN Ubiquitin-like modifier-activating enzyme ATG7 OS=Homo sapiens OX=9606 GN=ATG7 PE=1 SV=1	D	C#LGGGKPK	NA	NA	1	NA	NA	0.347135	NA	NA	1
Q99460	660	PSMD1	PSMD1_C660	PSMD1_HUMAN 26S proteasome non-ATPase regulatory subunit 1 OS=Homo sapiens OX=9606 GN=PSMD1 PE=1 SV=2	C	C#AGTGNK	NA	NA	1	NA	NA	0.347666	NA	NA	1
P23919	31	DTYMK	DTYMK_C31	KTHY_HUMAN Thymidylate kinase OS=Homo sapiens OX=9606 GN=DTYMK PE=1 SV=4	L	C#AAGHR	NA	NA	1	NA	NA	0.351475	NA	NA	1
O60826	215	CCDC22	CCDC22_C215	CCD22_HUMAN Coiled-coil domain-containing protein 22 OS=Homo sapiens OX=9606 GN=CCDC22 PE=1 SV=1	L	C#QQTGR	NA	NA	1	NA	NA	0.355537	NA	NA	1
P51965	67	UBE2E1	UBE2E1_C67	UB2E1_HUMAN Ubiquitin-conjugating enzyme E2 E1 OS=Homo sapiens OX=9606 GN=UBE2E1 PE=1 SV=1	N	C#SAGPK	NA	NA	1	NA	NA	0.357251	NA	NA	1
P61163	34	ACTR1A	ACTR1A_C34	ACTZ_HUMAN Alpha-centractin OS=Homo sapiens OX=9606 GN=ACTR1A PE=1 SV=1	Y	C#FPNYVGR	NA	NA	1	NA	NA	0.358147	NA	NA	1
Q08J23	184	NSUN2	NSUN2_C184	NSUN2_HUMAN tRNA (cytosine(34)-C(5))-methyltransferase OS=Homo sapiens OX=9606 GN=NSUN2 PE=1 SV=2	M	C#AAPGSK	NA	NA	1	NA	NA	0.358991	NA	NA	1
Q9UJ83	261	HACL1	HACL1_C261	HACL1_HUMAN 2-hydroxyacyl-CoA lyase 1 OS=Homo sapiens OX=9606 GN=HACL1 PE=1 SV=2	Y	C#VGAAR	NA	NA	1	NA	NA	0.36175	NA	NA	1
Q32P44	604	EML3	EML3_C604	EMAL3_HUMAN Echinoderm microtubule-associated protein-like 3 OS=Homo sapiens OX=9606 GN=EML3 PE=1 SV=1	L	C#THPSQNR	NA	NA	1	NA	NA	0.365333	NA	NA	1
Q03111	479	MLLT1	MLLT1_C479	ENL_HUMAN Protein ENL OS=Homo sapiens OX=9606 GN=MLLT1 PE=1 SV=2	S	C#SKPEK	NA	NA	1	NA	NA	0.36584	NA	NA	1
P17066	308	HSPA6	HSPA6_C308	HSP76_HUMAN Heat shock 70 kDa protein 6 OS=Homo sapiens OX=9606 GN=HSPA6 PE=1 SV=2	L	C#SDIFR	NA	NA	1	NA	NA	0.366734	NA	NA	1
P19622	89	EN2	EN2_C89	HME2_HUMAN Homeobox protein engrailed-2 OS=Homo sapiens OX=9606 GN=EN2 PE=2 SV=3	C	C#AGAGGGR	NA	NA	1	NA	NA	0.367445	NA	NA	1
P31040	475	SDHA	SDHA_C475	SDHA_HUMAN Succinate dehydrogenase [ubiquinone] flavoprotein subunit, mitochondrial OS=Homo sapiens OX=9606 GN=SDHA PE=1 SV=2	S	C#RPGDK	NA	NA	1	NA	NA	0.369752	NA	NA	1
P43243	296	MATR3	MATR3_C296	MATR3_HUMAN Matrin-3 OS=Homo sapiens OX=9606 GN=MATR3 PE=1 SV=2	I	C#DLPVHSN	NA	NA	1	NA	NA	0.372095	NA	NA	1
Q14146	824	URB2	URB2_C824	URB2_HUMAN Unhealthy ribosome biogenesis protein 2 homolog OS=Homo sapiens OX=9606 GN=URB2 PE=1 SV=2	L	C#SGAQR	NA	NA	1	NA	NA	0.372876	NA	NA	1
P04183	3	TK1	TK1_C3	KITH_HUMAN Thymidine kinase, cytosolic OS=Homo sapiens OX=9606 GN=TK1 PE=1 SV=2	S	NA	C#INLPTVLPGSPSK	NA	NA	1	NA	NA	0.00643249	NA	1
Q92560	320	BAP1	BAP1_C320	BAP1_HUMAN Ubiquitin carboxyl-terminal hydrolase BAP1 OS=Homo sapiens OX=9606 GN=BAP1 PE=1 SV=2	S	NA	C#AQAPSHSPPNKPK	NA	NA	2	NA	NA	0.0902459	NA	1
P23588	457	EIF4B	EIF4B_C457	IF4B_HUMAN Eukaryotic translation initiation factor 4B OS=Homo sapiens OX=9606 GN=EIF4B PE=1 SV=2	D	NA	C#HSPTSKPPKPDQPLK	NA	NA	2	NA	NA	0.0433487	NA	1
P21108	165	PRPS1L1	PRPS1L1_C165	PRPS3_HUMAN Ribose-phosphate pyrophosphokinase 3 OS=Homo sapiens OX=9606 GN=PRPS1L1 PE=1 SV=2	N	NA	C#IIVSPDAGGAK	NA	NA	1	NA	NA	0.0130247	NA	1
Q16822	210	PCK2	PCK2_C210	PCKGM_HUMAN Phosphoenolpyruvate carboxykinase [GTP], mitochondrial OS=Homo sapiens OX=9606 GN=PCK2 PE=1 SV=4	K	NA	C#LHSVGQPLTGQ	NA	NA	1	NA	NA	0.0141764	NA	1
P04843	477	RPN1	RPN1_C477	RPN1_HUMAN Dolichyl-diphosphooligosaccharide--protein glycosyltransferase subunit 1 OS=Homo sapiens OX=9606 GN=RPN1 PE=1 SV=1	A	NA	C#ITEQVLTLVNK C#ITEQVLTL	NA	NA	2	NA	NA	0.0832563	NA	1
Q99871	119	HAUS7	HAUS7_C119	HAUS7_HUMAN HAUS augmin-like complex subunit 7 OS=Homo sapiens OX=9606 GN=HAUS7 PE=1 SV=3	L	NA	C#APDDQELLK	NA	NA	1	NA	NA	0.0196898	NA	1
Q9BW83	8	IFT27	IFT27_C8	IFT27_HUMAN Intraflagellar transport protein 27 homolog OS=Homo sapiens OX=9606 GN=IFT27 PE=1 SV=1	K	NA	C#ILAGDPAVGK	NA	NA	1	NA	NA	0.0205172	NA	1
P00505	382	GOT2	GOT2_C382	AATM_HUMAN Aspartate aminotransferase, mitochondrial OS=Homo sapiens OX=9606 GN=GOT2 PE=1 SV=3	F	NA	C#FTGLKPEQVER	NA	NA	1	NA	NA	0.0206489	NA	1
Q8IWA0	12	WDR75	WDR75_C12	WDR75_HUMAN WD repeat-containing protein 75 OS=Homo sapiens OX=9606 GN=WDR75 PE=1 SV=1	R	NA	C#GGSELNFR	NA	NA	1	NA	NA	0.0264063	NA	1
Q08379	64	GOLGA2	GOLGA2_C64	GOGA2_HUMAN Golgin subfamily A member 2 OS=Homo sapiens OX=9606 GN=GOLGA2 PE=1 SV=3	G	NA	C#HSPEDTPK	NA	NA	1	NA	NA	0.0303103	NA	1
Q4VCS5	647	AMOT	AMOT_C647	AMOT_HUMAN Angiomotin OS=Homo sapiens OX=9606 GN=AMOT PE=1 SV=1	N	NA	C#QPTNVSEYNAA	NA	NA	1	NA	NA	0.0310959	NA	1
P54578	277	USP14	USP14_C277	UBP14_HUMAN Ubiquitin carboxyl-terminal hydrolase 14 OS=Homo sapiens OX=9606 GN=USP14 PE=1 SV=3	S	NA	C#FINQEVK	NA	NA	2	NA	NA	0.106137	NA	1
P49327	180	FASN	FASN_C180	FAS_HUMAN Fatty acid synthase OS=Homo sapiens OX=9606 GN=FASN PE=1 SV=3	Q	NA	C#PAAIVGGIN	NA	NA	1	NA	NA	0.0348322	NA	1
Q13613	12	MTMR1	MTMR1_C12	MTMR1_HUMAN Myotubularin-related protein 1 OS=Homo sapiens OX=9606 GN=MTMR1 PE=1 SV=4	G	NA	C#EGGGGPNPGPAGGR	NA	NA	1	NA	NA	0.0349561	NA	1
Q8N1F7	569	NUP93	NUP93_C569	NUP93_HUMAN Nuclear pore complex protein Nup93 OS=Homo sapiens OX=9606 GN=NUP93 PE=1 SV=2	R	NA	C#VSELVIESR	NA	NA	1	NA	NA	0.0352178	NA	1
P40227	233	CCT6A	CCT6A_C233	TCPZ_HUMAN T-complex protein 1 subunit zeta OS=Homo sapiens OX=9606 GN=CCT6A PE=1 SV=3	T	NA	C#NVSLEYEK	NA	NA	1	NA	NA	0.035587	NA	1
Q9Y4C8	895	RBM19	RBM19_C895	RBM19_HUMAN Probable RNA-binding protein 19 OS=Homo sapiens OX=9606 GN=RBM19 PE=1 SV=3	L	NA	C#HSTHLYGR	NA	NA	2	NA	NA	0.151361	NA	1
Q7Z4Q2	413	HEATR3	HEATR3_C413	HEAT3_HUMAN HEAT repeat-containing protein 3 OS=Homo sapiens OX=9606 GN=HEATR3 PE=1 SV=2	L	NA	C#LSHEVHTA	NA	NA	1	NA	NA	0.0409933	NA	1
O60343	93	TBC1D4	TBC1D4_C93	TBCD4_HUMAN TBC1 domain family member 4 OS=Homo sapiens OX=9606 GN=TBC1D4 PE=1 SV=2	R	NA	C#VPAPGAGAS	NA	NA	1	NA	NA	0.0437248	NA	1
O43175	369	PHGDH	PHGDH_C369	SERA_HUMAN D-3-phosphoglycerate dehydrogenase OS=Homo sapiens OX=9606 GN=PHGDH PE=1 SV=4	N	NA	C#LSPAVIVGL	NA	NA	1	NA	NA	0.0518194	NA	1
Q9BUJ2	391	HNRNPUL1	HNRNPUL1_C391	HNRL1_HUMAN Heterogeneous nuclear ribonucleoprotein U-like protein 1 OS=Homo sapiens OX=9606 GN=HNRNPUL1 PE=1 SV=2	Y	NA	C#SVLPGFTFIQ	NA	NA	1	NA	NA	0.0552011	NA	1
A0A0U1RR11	225	CENPVL1	CENPVL1_C225	CENL1_HUMAN Centromere protein V-like protein 1 OS=Homo sapiens OX=9606 GN=CENPVL1 PE=2 SV=1	H	NA	C#LDEGTVR	NA	NA	1	NA	NA	0.059007	NA	1
P35579	468	MYH9	MYH9_C468	MYH9_HUMAN Myosin-9 OS=Homo sapiens OX=9606 GN=MYH9 PE=1 SV=4	L	NA	C#INYTNEK	NA	NA	2	NA	NA	0.195278	NA	1
Q9HCK8	1913	CHD8	CHD8_C1913	CHD8_HUMAN Chromodomain-helicase-DNA-binding protein 8 OS=Homo sapiens OX=9606 GN=CHD8 PE=1 SV=5	L	NA	C#QPPGPELPK	NA	NA	1	NA	NA	0.060736	NA	1
P21333	1260	FLNA	FLNA_C1260	FLNA_HUMAN Filamin-A OS=Homo sapiens OX=9606 GN=FLNA PE=1 SV=4	Q	NA	C#YGPGIEGQ	NA	NA	1	NA	NA	0.064319	NA	1
P52732	911	KIF11	KIF11_C911	KIF11_HUMAN Kinesin-like protein KIF11 OS=Homo sapiens OX=9606 GN=KIF11 PE=1 SV=2	N	NA	C#FLEQDLK	NA	NA	1	NA	NA	0.0656643	NA	1
Q00839	497	HNRNPU	HNRNPU_C497	HNRPU_HUMAN Heterogeneous nuclear ribonucleoprotein U OS=Homo sapiens OX=9606 GN=HNRNPU PE=1 SV=6	D	NA	C#EVVMMIGLPGAGK	NA	NA	1	NA	NA	0.0660747	NA	1
P18858	508	LIG1	LIG1_C508	DNLI1_HUMAN DNA ligase 1 OS=Homo sapiens OX=9606 GN=LIG1 PE=1 SV=1	F	NA	C#EVPDLDR	NA	NA	1	NA	NA	0.0665347	NA	1
Q00610	934	CLTC	CLTC_C934	CLH1_HUMAN Clathrin heavy chain 1 OS=Homo sapiens OX=9606 GN=CLTC PE=1 SV=5	V	NA	C#NENSLFK	NA	NA	1	NA	NA	0.0665962	NA	1
P07195	164	LDHB	LDHB_C164	LDHB_HUMAN L-lactate dehydrogenase B chain OS=Homo sapiens OX=9606 GN=LDHB PE=1 SV=2	G	NA	C#NLDSAR	NA	NA	1	NA	NA	0.0853237	NA	1
P08240	25	SRPRA	SRPRA_C25	SRPRA_HUMAN Signal recognition particle receptor subunit alpha OS=Homo sapiens OX=9606 GN=SRPRA PE=1 SV=2	S	NA	C#TGPVNAL	NA	NA	1	NA	NA	0.0681583	NA	1
Q9UHQ9	288	CYB5R1	CYB5R1_C288	NB5R1_HUMAN NADH-cytochrome b5 reductase 1 OS=Homo sapiens OX=9606 GN=CYB5R1 PE=1 SV=1	A	NA	C#HPNLDK	NA	NA	1	NA	NA	0.0724769	NA	1
Q9Y320	186	TMX2	TMX2_C186	TMX2_HUMAN Thioredoxin-related transmembrane protein 2 OS=Homo sapiens OX=9606 GN=TMX2 PE=1 SV=1	N	NA	C#TGLNFGK	NA	NA	1	NA	NA	0.0742979	NA	1
Q9H4I3	217	TRABD	TRABD_C217	TRABD_HUMAN TraB domain-containing protein OS=Homo sapiens OX=9606 GN=TRABD PE=1 SV=1	L	NA	C#FLSDPISK	NA	NA	1	NA	NA	0.0744362	NA	1
Q92597	289	NDRG1	NDRG1_C289	NDRG1_HUMAN Protein NDRG1 OS=Homo sapiens OX=9606 GN=NDRG1 PE=1 SV=1	D	NA	C#GGLPQISQPAK	NA	NA	1	NA	NA	0.0750913	NA	1
P23396	97	RPS3	RPS3_C97	RS3_HUMAN 40S ribosomal protein S3 OS=Homo sapiens OX=9606 GN=RPS3 PE=1 SV=2	L	NA	C#AIAQAESLR	NA	NA	1	NA	NA	0.0757517	NA	1
Q13347	57	EIF3I	EIF3I_C57	EIF3I_HUMAN Eukaryotic translation initiation factor 3 subunit I OS=Homo sapiens OX=9606 GN=EIF3I PE=1 SV=1	W	NA	C#VDADWDTK	NA	NA	1	NA	NA	0.0790322	NA	1
Q16656	134	NRF1	NRF1_C134	NRF1_HUMAN Nuclear respiratory factor 1 OS=Homo sapiens OX=9606 GN=NRF1 PE=1 SV=1	L	NA	C#ISPSKPNPVFK	NA	NA	1	NA	NA	0.0791567	NA	1
Q9BXB4	240	OSBPL11	OSBPL11_C240	OSB11_HUMAN Oxysterol-binding protein-related protein 11 OS=Homo sapiens OX=9606 GN=OSBPL11 PE=1 SV=2	E	NA	C#LPTSGHLS	NA	NA	1	NA	NA	0.081195	NA	1
P13798	30	APEH	APEH_C30	ACPH_HUMAN Acylamino-acid-releasing enzyme OS=Homo sapiens OX=9606 GN=APEH PE=1 SV=4	A	NA	C#LGPEVTTQ	NA	NA	1	NA	NA	0.0813414	NA	1
Q9BZF1	617	OSBPL8	OSBPL8_C617	OSBL8_HUMAN Oxysterol-binding protein-related protein 8 OS=Homo sapiens OX=9606 GN=OSBPL8 PE=1 SV=3	D	NA	C#VNQISGK	NA	NA	1	NA	NA	0.0835563	NA	1
O94925	525	GLS	GLS_C525	GLSK_HUMAN Glutaminase kidney isoform, mitochondrial OS=Homo sapiens OX=9606 GN=GLS PE=1 SV=1	L	NA	C#NFHNYDNLR	NA	NA	1	NA	NA	0.0852533	NA	1
O43663	80	PRC1	PRC1_C80	PRC1_HUMAN Protein regulator of cytokinesis 1 OS=Homo sapiens OX=9606 GN=PRC1 PE=1 SV=2	L	NA	C#SELHVEPF	NA	NA	1	NA	NA	0.0892912	NA	1
P57737	303	CORO7	CORO7_C303	CORO7_HUMAN Coronin-7 OS=Homo sapiens OX=9606 GN=CORO7 PE=1 SV=2	Q	NA	C#VLESVLR	NA	NA	1	NA	NA	0.0907196	NA	1
P35914	141	HMGCL	HMGCL_C141	HMGCL_HUMAN Hydroxymethylglutaryl-CoA lyase, mitochondrial OS=Homo sapiens OX=9606 GN=HMGCL PE=1 SV=2	N	NA	C#SIEESFQR	NA	NA	1	NA	NA	0.0916544	NA	1
Q5SNT2	11	TMEM201	TMEM201_C11	TM201_HUMAN Transmembrane protein 201 OS=Homo sapiens OX=9606 GN=TMEM201 PE=1 SV=1	R	NA	C#PTAGLAGGL C#PTAGLA	NA	NA	3	NA	NA	0.312768	NA	1
Q8TAT6	208	NPLOC4	NPLOC4_C208	NPL4_HUMAN Nuclear protein localization protein 4 homolog OS=Homo sapiens OX=9606 GN=NPLOC4 PE=1 SV=3	K	NA	C#QPSAITL	NA	NA	1	NA	NA	0.0957617	NA	1
Q14166	563	TTLL12	TTLL12_C563	TTL12_HUMAN Tubulin--tyrosine ligase-like protein 12 OS=Homo sapiens OX=9606 GN=TTLL12 PE=1 SV=2	A	NA	C#AKPPPLGL	NA	NA	2	NA	NA	0.143542	NA	1
O94830	207	DDHD2	DDHD2_C207	DDHD2_HUMAN Phospholipase DDHD2 OS=Homo sapiens OX=9606 GN=DDHD2 PE=1 SV=2	H	NA	C#GEPLQIDHL	NA	NA	1	NA	NA	0.103863	NA	1
Q13085	1116	ACACA	ACACA_C1116	ACACA_HUMAN Acetyl-CoA carboxylase 1 OS=Homo sapiens OX=9606 GN=ACACA PE=1 SV=2	F	NA	C#IENLQK	NA	NA	1	NA	NA	0.105926	NA	1
Q9Y490	243	TLN1	TLN1_C243	TLN1_HUMAN Talin-1 OS=Homo sapiens OX=9606 GN=TLN1 PE=1 SV=3	Q	NA	C#QIQFGPHNEQK	NA	NA	1	NA	NA	0.107685	NA	1
P41252	1153	IARS	IARS_C1153	SYIC_HUMAN Isoleucine--tRNA ligase, cytoplasmic OS=Homo sapiens OX=9606 GN=IARS PE=1 SV=2	L	NA	C#VTAGSAPSLIN	NA	NA	1	NA	NA	0.108101	NA	1
P52788	337	SMS	SMS_C337	SPSY_HUMAN Spermine synthase OS=Homo sapiens OX=9606 GN=SMS PE=1 SV=2	Y	NA	C#PVEFSK	NA	NA	2	NA	NA	0.23851	NA	1
Q00535	94	CDK5	CDK5_C94	CDK5_HUMAN Cyclin-dependent-like kinase 5 OS=Homo sapiens OX=9606 GN=CDK5 PE=1 SV=3	S	NA	C#NGDLDPEIVK	NA	NA	1	NA	NA	0.108473	NA	1
Q06547	331	GABPB1	GABPB1_C331	GABP1_HUMAN GA-binding protein subunit beta-1 OS=Homo sapiens OX=9606 GN=GABPB1 PE=1 SV=2	Q	NA	C#IEIIENR	NA	NA	1	NA	NA	0.109561	NA	1
Q02952	470	AKAP12	AKAP12_C470	AKA12_HUMAN A-kinase anchor protein 12 OS=Homo sapiens OX=9606 GN=AKAP12 PE=1 SV=4	T	NA	C#VSGEDPTQGADLSPDEK	NA	NA	1	NA	NA	0.111813	NA	1
O60343	74	TBC1D4	TBC1D4_C74	TBCD4_HUMAN TBC1 domain family member 4 OS=Homo sapiens OX=9606 GN=TBC1D4 PE=1 SV=2	G	NA	C#GAPAAR	NA	NA	1	NA	NA	0.11488	NA	1
Q9NP73	86	ALG13	ALG13_C86	ALG13_HUMAN Putative bifunctional UDP-N-acetylglucosamine transferase and deubiquitinase ALG13 OS=Homo sapiens OX=9606 GN=ALG13 PE=1 SV=2	S	NA	C#LETLEK	NA	NA	1	NA	NA	0.118211	NA	1
Q9HCK8	2378	CHD8	CHD8_C2378	CHD8_HUMAN Chromodomain-helicase-DNA-binding protein 8 OS=Homo sapiens OX=9606 GN=CHD8 PE=1 SV=5	N	NA	C#LGMEPVQTA	NA	NA	1	NA	NA	0.121683	NA	1
P13489	134	RNH1	RNH1_C134	RINI_HUMAN Ribonuclease inhibitor OS=Homo sapiens OX=9606 GN=RNH1 PE=1 SV=2	L	NA	C#EGLLDPQ	NA	NA	1	NA	NA	0.123644	NA	1
P26640	1052	VARS	VARS_C1052	SYVC_HUMAN Valine--tRNA ligase OS=Homo sapiens OX=9606 GN=VARS PE=1 SV=4	T	NA	C#LDVGLR	NA	NA	1	NA	NA	0.126187	NA	1
P49721	46	PSMB2	PSMB2_C46	PSB2_HUMAN Proteasome subunit beta type-2 OS=Homo sapiens OX=9606 GN=PSMB2 PE=1 SV=1	L	NA	C#VGEAGDTVQFA	NA	NA	1	NA	NA	0.126474	NA	1
Q9H981	280	ACTR8	ACTR8_C280	ARP8_HUMAN Actin-related protein 8 OS=Homo sapiens OX=9606 GN=ACTR8 PE=1 SV=2	T	NA	C#IVDVGDQK	NA	NA	1	NA	NA	0.126561	NA	1
Q13541	7	EIF4EBP1	EIF4EBP1_C7	4EBP1_HUMAN Eukaryotic translation initiation factor 4E-binding protein 1 OS=Homo sapiens OX=9606 GN=EIF4EBP1 PE=1 SV=3	S	NA	C#SQTPSR	NA	NA	1	NA	NA	0.12669	NA	1
Q9Y4C2	144	TCAF1	TCAF1_C144	TCAF1_HUMAN TRPM8 channel-associated factor 1 OS=Homo sapiens OX=9606 GN=TCAF1 PE=1 SV=3	K	NA	C#GGGLLIGGQ	NA	NA	1	NA	NA	0.128234	NA	1
Q13547	273	HDAC1	HDAC1_C273	HDAC1_HUMAN Histone deacetylase 1 OS=Homo sapiens OX=9606 GN=HDAC1 PE=1 SV=1	G	NA	C#FNLTIK	NA	NA	1	NA	NA	0.135274	NA	1
Q9BUK6	403	MSTO1	MSTO1_C403	MSTO1_HUMAN Protein misato homolog 1 OS=Homo sapiens OX=9606 GN=MSTO1 PE=1 SV=1	A	NA	C#GEPSGTR	NA	NA	1	NA	NA	0.135892	NA	1
Q00839	594	HNRNPU	HNRNPU_C594	HNRPU_HUMAN Heterogeneous nuclear ribonucleoprotein U OS=Homo sapiens OX=9606 GN=HNRNPU PE=1 SV=6	M	NA	C#LFAGFQR	NA	NA	1	NA	NA	0.13748	NA	1
Q9Y5Y2	54	NUBP2	NUBP2_C54	NUBP2_HUMAN Cytosolic Fe-S cluster assembly factor NUBP2 OS=Homo sapiens OX=9606 GN=NUBP2 PE=1 SV=1	L	NA	C#GPSIPR	NA	NA	1	NA	NA	0.138758	NA	1
Q01081	67	U2AF1	U2AF1_C67	U2AF1_HUMAN Splicing factor U2AF 35 kDa subunit OS=Homo sapiens OX=9606 GN=U2AF1 PE=1 SV=3	R	NA	C#AVSDVEMQ	NA	NA	1	NA	NA	0.147502	NA	1
Q01082	112	SPTBN1	SPTBN1_C112	SPTB2_HUMAN Spectrin beta chain, non-erythrocytic 1 OS=Homo sapiens OX=9606 GN=SPTBN1 PE=1 SV=2	H	NA	C#LENVDK	NA	NA	1	NA	NA	0.148149	NA	1
Q6IQ49	298	SDE2	SDE2_C298	SDE2_HUMAN Replication stress response regulator SDE2 OS=Homo sapiens OX=9606 GN=SDE2 PE=1 SV=1	S	NA	C#AELGESK	NA	NA	1	NA	NA	0.148378	NA	1
O95782	492	AP2A1	AP2A1_C492	AP2A1_HUMAN AP-2 complex subunit alpha-1 OS=Homo sapiens OX=9606 GN=AP2A1 PE=1 SV=3	A	NA	C#HENMVK	NA	NA	1	NA	NA	0.151495	NA	1
Q4KMP7	224	TBC1D10B	TBC1D10B_C224	TB10B_HUMAN TBC1 domain family member 10B OS=Homo sapiens OX=9606 GN=TBC1D10B PE=1 SV=3	T	NA	C#EAPVAVVT	NA	NA	1	NA	NA	0.151591	NA	1
Q9P2J5	70	LARS	LARS_C70	SYLC_HUMAN Leucine--tRNA ligase, cytoplasmic OS=Homo sapiens OX=9606 GN=LARS PE=1 SV=2	K	NA	C#EFAVGYQR	NA	NA	1	NA	NA	0.152359	NA	1
P25786	182	PSMA1	PSMA1_C182	PSA1_HUMAN Proteasome subunit alpha type-1 OS=Homo sapiens OX=9606 GN=PSMA1 PE=1 SV=1	E	NA	C#NLNELVK	NA	NA	1	NA	NA	0.154548	NA	1
Q9NW82	430	WDR70	WDR70_C430	WDR70_HUMAN WD repeat-containing protein 70 OS=Homo sapiens OX=9606 GN=WDR70 PE=1 SV=1	C	NA	C#FSPDDK	NA	NA	1	NA	NA	0.154704	NA	1
Q14980	803	NUMA1	NUMA1_C803	NUMA1_HUMAN Nuclear mitotic apparatus protein 1 OS=Homo sapiens OX=9606 GN=NUMA1 PE=1 SV=2	E	NA	C#EQLVK	NA	NA	1	NA	NA	0.159397	NA	1
P19623	71	SRM	SRM_C71	SPEE_HUMAN Spermidine synthase OS=Homo sapiens OX=9606 GN=SRM PE=1 SV=1	Q	NA	C#TERDEFSYQ	NA	NA	1	NA	NA	0.163102	NA	1
Q8IVW6	540	ARID3B	ARID3B_C540	ARI3B_HUMAN AT-rich interactive domain-containing protein 3B OS=Homo sapiens OX=9606 GN=ARID3B PE=1 SV=2	H	NA	C#SPSPTSSR	NA	NA	1	NA	NA	0.163216	NA	1
Q8N668	160	COMMD1	COMMD1_C160	COMD1_HUMAN COMM domain-containing protein 1 OS=Homo sapiens OX=9606 GN=COMMD1 PE=1 SV=1	L	NA	C#LEFDEVK	NA	NA	1	NA	NA	0.166067	NA	1
Q15645	341	TRIP13	TRIP13_C341	PCH2_HUMAN Pachytene checkpoint protein 2 homolog OS=Homo sapiens OX=9606 GN=TRIP13 PE=1 SV=2	K	NA	C#QIIYPR	NA	NA	1	NA	NA	0.168319	NA	1
Q3KQV9	254	UAP1L1	UAP1L1_C254	UAP1L_HUMAN UDP-N-acetylhexosamine pyrophosphorylase-like protein 1 OS=Homo sapiens OX=9606 GN=UAP1L1 PE=1 SV=2	Y	NA	C#VDNILVR	NA	NA	1	NA	NA	0.168809	NA	1
Q9Y606	268	PUS1	PUS1_C268	TRUA_HUMAN tRNA pseudouridine synthase A OS=Homo sapiens OX=9606 GN=PUS1 PE=1 SV=3	Y	NA	C#EEPFVR	NA	NA	1	NA	NA	0.171997	NA	1
Q13185	160	CBX3	CBX3_C160	CBX3_HUMAN Chromobox protein homolog 3 OS=Homo sapiens OX=9606 GN=CBX3 PE=1 SV=4	K	NA	C#PQIVIA	NA	NA	1	NA	NA	0.17241	NA	1
Q5U5X0	97	LYRM7	LYRM7_C97	LYRM7_HUMAN Complex III assembly factor LYRM7 OS=Homo sapiens OX=9606 GN=LYRM7 PE=1 SV=1	Y	NA	C#DAPTQK	NA	NA	1	NA	NA	0.173328	NA	1
O00151	45	PDLIM1	PDLIM1_C45	PDLI1_HUMAN PDZ and LIM domain protein 1 OS=Homo sapiens OX=9606 GN=PDLIM1 PE=1 SV=4	L	NA	C#IGDVITA	NA	NA	1	NA	NA	0.17456	NA	1
Q9NPQ8	400	RIC8A	RIC8A_C400	RIC8A_HUMAN Synembryn-A OS=Homo sapiens OX=9606 GN=RIC8A PE=1 SV=3	L	NA	C#SESVPR	NA	NA	1	NA	NA	0.175407	NA	1
P27708	1296	CAD	CAD_C1296	PYR1_HUMAN CAD protein OS=Homo sapiens OX=9606 GN=CAD PE=1 SV=3	R	NA	C#EAYLK	NA	NA	1	NA	NA	0.17902	NA	1
Q14318	4	FKBP8	FKBP8_C4	FKBP8_HUMAN Peptidyl-prolyl cis-trans isomerase FKBP8 OS=Homo sapiens OX=9606 GN=FKBP8 PE=1 SV=2	S	NA	C#AEPSEPSAPLPA	NA	NA	1	NA	NA	0.180683	NA	1
Q96EL2	103	MRPS24	MRPS24_C103	RT24_HUMAN 28S ribosomal protein S24, mitochondrial OS=Homo sapiens OX=9606 GN=MRPS24 PE=1 SV=1	G	NA	C#LADQLVLK	NA	NA	1	NA	NA	0.181839	NA	1
Q96F86	272	EDC3	EDC3_C272	EDC3_HUMAN Enhancer of mRNA-decapping protein 3 OS=Homo sapiens OX=9606 GN=EDC3 PE=1 SV=1	F	NA	C#TDSGLVVPS	NA	NA	1	NA	NA	0.184708	NA	1
O75094	1051	SLIT3	SLIT3_C1051	SLIT3_HUMAN Slit homolog 3 protein OS=Homo sapiens OX=9606 GN=SLIT3 PE=2 SV=3	K	NA	C#IPLDK	NA	NA	1	NA	NA	0.187463	NA	1
Q5JTH9	839	RRP12	RRP12_C839	RRP12_HUMAN RRP12-like protein OS=Homo sapiens OX=9606 GN=RRP12 PE=1 SV=2	K	NA	C#LLHIVR	NA	NA	1	NA	NA	0.189723	NA	1
Q9H7D7	259	WDR26	WDR26_C259	WDR26_HUMAN WD repeat-containing protein 26 OS=Homo sapiens OX=9606 GN=WDR26 PE=1 SV=3	M	NA	C#SHAEDLR	NA	NA	1	NA	NA	0.190028	NA	1
Q8NI27	436	THOC2	THOC2_C436	THOC2_HUMAN THO complex subunit 2 OS=Homo sapiens OX=9606 GN=THOC2 PE=1 SV=2	F	NA	C#YLGPH	NA	NA	1	NA	NA	0.191264	NA	1
Q9UBB4	134	ATXN10	ATXN10_C134	ATX10_HUMAN Ataxin-10 OS=Homo sapiens OX=9606 GN=ATXN10 PE=1 SV=1	R	NA	C#GLQFLGNIA	NA	NA	1	NA	NA	0.191327	NA	1
Q96EQ0	38	SGTB	SGTB_C38	SGTB_HUMAN Small glutamine-rich tetratricopeptide repeat-containing protein beta OS=Homo sapiens OX=9606 GN=SGTB PE=1 SV=1	Q	NA	C#LETVFK	NA	NA	1	NA	NA	0.191987	NA	1
Q6P2E9	976	EDC4	EDC4_C976	EDC4_HUMAN Enhancer of mRNA-decapping protein 4 OS=Homo sapiens OX=9606 GN=EDC4 PE=1 SV=1	L	NA	C#TQLEGL	NA	NA	1	NA	NA	0.193602	NA	1
P21333	810	FLNA	FLNA_C810	FLNA_HUMAN Filamin-A OS=Homo sapiens OX=9606 GN=FLNA PE=1 SV=4	K	NA	C#APGVVGPA	NA	NA	1	NA	NA	0.193887	NA	1
Q6NXT1	230	ANKRD54	ANKRD54_C230	ANR54_HUMAN Ankyrin repeat domain-containing protein 54 OS=Homo sapiens OX=9606 GN=ANKRD54 PE=1 SV=2	Q	NA	C#LEAVR	NA	NA	1	NA	NA	0.202247	NA	1
P46459	11	NSF	NSF_C11	NSF_HUMAN Vesicle-fusing ATPase OS=Homo sapiens OX=9606 GN=NSF PE=1 SV=3	R	NA	C#PTDELSLT	NA	NA	1	NA	NA	0.20937	NA	1
Q15797	109	SMAD1	SMAD1_C109	SMAD1_HUMAN Mothers against decapentaplegic homolog 1 OS=Homo sapiens OX=9606 GN=SMAD1 PE=1 SV=1	C	NA	C#EFPFGSK	NA	NA	1	NA	NA	0.215915	NA	1
P41229	1213	KDM5C	KDM5C_C1213	KDM5C_HUMAN Lysine-specific demethylase 5C OS=Homo sapiens OX=9606 GN=KDM5C PE=1 SV=2	R	NA	C#VSVPR	NA	NA	1	NA	NA	0.215941	NA	1
Q9UJA3	468	MCM8	MCM8_C468	MCM8_HUMAN DNA helicase MCM8 OS=Homo sapiens OX=9606 GN=MCM8 PE=1 SV=2	A	NA	C#NVAPR	NA	NA	1	NA	NA	0.218271	NA	1
P41440	580	SLC19A1	SLC19A1_C580	S19A1_HUMAN Reduced folate transporter OS=Homo sapiens OX=9606 GN=SLC19A1 PE=1 SV=3	Q	NA	C#LPSDGVQNVNQ	NA	NA	1	NA	NA	0.218869	NA	1
O94826	442	TOMM70	TOMM70_C442	TOM70_HUMAN Mitochondrial import receptor subunit TOM70 OS=Homo sapiens OX=9606 GN=TOMM70 PE=1 SV=1	K	NA	C#FALYR	NA	NA	1	NA	NA	0.221027	NA	1
Q13263	91	TRIM28	TRIM28_C91	TIF1B_HUMAN Transcription intermediary factor 1-beta OS=Homo sapiens OX=9606 GN=TRIM28 PE=1 SV=5	A	NA	C#LGPAAPA	NA	NA	2	NA	NA	0.26443	NA	1
Q9NU22	1598	MDN1	MDN1_C1598	MDN1_HUMAN Midasin OS=Homo sapiens OX=9606 GN=MDN1 PE=1 SV=2	K	NA	C#VVSIR	NA	NA	2	NA	NA	0.290395	NA	1
O95835	814	LATS1	LATS1_C814	LATS1_HUMAN Serine/threonine-protein kinase LATS1 OS=Homo sapiens OX=9606 GN=LATS1 PE=1 SV=1	T	NA	C#AVESVHK	NA	NA	2	NA	NA	0.268898	NA	1
Q6Y7W6	133	GIGYF2	GIGYF2_C133	GGYF2_HUMAN GRB10-interacting GYF protein 2 OS=Homo sapiens OX=9606 GN=GIGYF2 PE=1 SV=1	E	NA	C#GFYQR	NA	NA	1	NA	NA	0.233909	NA	1
Q9BVA0	250	KATNB1	KATNB1_C250	KTNB1_HUMAN Katanin p80 WD40 repeat-containing subunit B1 OS=Homo sapiens OX=9606 GN=KATNB1 PE=1 SV=1	G	NA	C#QDSLR	NA	NA	1	NA	NA	0.236059	NA	1
P05549	212	TFAP2A	TFAP2A_C212	AP2A_HUMAN Transcription factor AP-2-alpha OS=Homo sapiens OX=9606 GN=TFAP2A PE=1 SV=1	F	NA	C#SVPGR	NA	NA	1	NA	NA	0.237247	NA	1
Q96EK6	45	GNPNAT1	GNPNAT1_C45	GNA1_HUMAN Glucosamine 6-phosphate N-acetyltransferase OS=Homo sapiens OX=9606 GN=GNPNAT1 PE=1 SV=1	L	NA	C#TADLNR	NA	NA	1	NA	NA	0.239685	NA	1
Q9H0Q3	63	FXYD6	FXYD6_C63	FXYD6_HUMAN FXYD domain-containing ion transport regulator 6 OS=Homo sapiens OX=9606 GN=FXYD6 PE=1 SV=1	K	NA	C#SFNQKPR	NA	NA	1	NA	NA	0.241039	NA	1
Q9H6F5	116	CCDC86	CCDC86_C116	CCD86_HUMAN Coiled-coil domain-containing protein 86 OS=Homo sapiens OX=9606 GN=CCDC86 PE=1 SV=1	R	NA	C#QPKPSEEAPK	NA	NA	1	NA	NA	0.241783	NA	1
P13639	466	EEF2	EEF2_C466	EF2_HUMAN Elongation factor 2 OS=Homo sapiens OX=9606 GN=EEF2 PE=1 SV=4	P	NA	C#GNIVGL	NA	NA	1	NA	NA	0.245107	NA	1
O95789	821	ZMYM6	ZMYM6_C821	ZMYM6_HUMAN Zinc finger MYM-type protein 6 OS=Homo sapiens OX=9606 GN=ZMYM6 PE=1 SV=2	K	NA	C#IIVEK	NA	NA	1	NA	NA	0.246397	NA	1
O75521	380	ECI2	ECI2_C380	ECI2_HUMAN Enoyl-CoA delta isomerase 2, mitochondrial OS=Homo sapiens OX=9606 GN=ECI2 PE=1 SV=4	E	NA	C#TNAVVN	NA	NA	1	NA	NA	0.247686	NA	1
Q10567	921	AP1B1	AP1B1_C921	AP1B1_HUMAN AP-1 complex subunit beta-1 OS=Homo sapiens OX=9606 GN=AP1B1 PE=1 SV=2	S	NA	C#TDLELSLK	NA	NA	1	NA	NA	0.248886	NA	1
Q14203	677	DCTN1	DCTN1_C677	DCTN1_HUMAN Dynactin subunit 1 OS=Homo sapiens OX=9606 GN=DCTN1 PE=1 SV=3	Q	NA	C#SVDVYK	NA	NA	1	NA	NA	0.249731	NA	1
P40763	108	STAT3	STAT3_C108	STAT3_HUMAN Signal transducer and activator of transcription 3 OS=Homo sapiens OX=9606 GN=STAT3 PE=1 SV=2	R	NA	C#LWEESR	NA	NA	1	NA	NA	0.250986	NA	1
Q9BQ67	280	GRWD1	GRWD1_C280	GRWD1_HUMAN Glutamate-rich WD repeat-containing protein 1 OS=Homo sapiens OX=9606 GN=GRWD1 PE=1 SV=1	S	NA	C#SADASIR	NA	NA	1	NA	NA	0.252876	NA	1
Q9H7D7	493	WDR26	WDR26_C493	WDR26_HUMAN WD repeat-containing protein 26 OS=Homo sapiens OX=9606 GN=WDR26 PE=1 SV=3	W	NA	C#LSDGK	NA	NA	1	NA	NA	0.256216	NA	1
Q96T76	760	MMS19	MMS19_C760	MMS19_HUMAN MMS19 nucleotide excision repair protein homolog OS=Homo sapiens OX=9606 GN=MMS19 PE=1 SV=2	K	NA	C#FAGLLNK	NA	NA	1	NA	NA	0.256843	NA	1
Q9BQ24	88	ZFYVE21	ZFYVE21_C88	ZFY21_HUMAN Zinc finger FYVE domain-containing protein 21 OS=Homo sapiens OX=9606 GN=ZFYVE21 PE=1 SV=1	M	NA	C#FVDPVR	NA	NA	1	NA	NA	0.262224	NA	1
Q9H6S0	620	YTHDC2	YTHDC2_C620	YTDC2_HUMAN 3'-5' RNA helicase YTHDC2 OS=Homo sapiens OX=9606 GN=YTHDC2 PE=1 SV=2	S	NA	C#DAGAVL	NA	NA	1	NA	NA	0.262323	NA	1
Q13625	50	TP53BP2	TP53BP2_C50	ASPP2_HUMAN Apoptosis-stimulating of p53 protein 2 OS=Homo sapiens OX=9606 GN=TP53BP2 PE=1 SV=2	W	NA	C#GSERPVADNER	NA	NA	1	NA	NA	0.263552	NA	1
Q9Y696	35	CLIC4	CLIC4_C35	CLIC4_HUMAN Chloride intracellular channel protein 4 OS=Homo sapiens OX=9606 GN=CLIC4 PE=1 SV=4	N	NA	C#PFSQR	NA	NA	1	NA	NA	0.263717	NA	1
P35606	351	COPB2	COPB2_C351	COPB2_HUMAN Coatomer subunit beta' OS=Homo sapiens OX=9606 GN=COPB2 PE=1 SV=2	S	NA	C#EIYPQ	NA	NA	1	NA	NA	0.264389	NA	1
Q9NNW5	577	WDR6	WDR6_C577	WDR6_HUMAN WD repeat-containing protein 6 OS=Homo sapiens OX=9606 GN=WDR6 PE=1 SV=1	T	NA	C#HGGYVY	NA	NA	1	NA	NA	0.264442	NA	1
Q99497	106	PARK7	PARK7_C106	PARK7_HUMAN Protein/nucleic acid deglycase DJ-1 OS=Homo sapiens OX=9606 GN=PARK7 PE=1 SV=2	I	NA	C#AGPTAL	NA	NA	1	NA	NA	0.26579	NA	1
Q9H361	339	PABPC3	PABPC3_C339	PABP3_HUMAN Polyadenylate-binding protein 3 OS=Homo sapiens OX=9606 GN=PABPC3 PE=1 SV=2	V	NA	C#FSSPEEATK	NA	NA	1	NA	NA	0.267009	NA	1
P84077	159	ARF1	ARF1_C159	ARF1_HUMAN ADP-ribosylation factor 1 OS=Homo sapiens OX=9606 GN=ARF1 PE=1 SV=2	T	NA	C#ATSGDGL	NA	NA	1	NA	NA	0.267113	NA	1
Q92598	845	HSPH1	HSPH1_C845	HS105_HUMAN Heat shock protein 105 kDa OS=Homo sapiens OX=9606 GN=HSPH1 PE=1 SV=1	E	NA	C#YPNEK	NA	NA	1	NA	NA	0.268725	NA	1
P78527	3187	PRKDC	PRKDC_C3187	PRKDC_HUMAN DNA-dependent protein kinase catalytic subunit OS=Homo sapiens OX=9606 GN=PRKDC PE=1 SV=3	R	NA	C#FFLSK	NA	NA	1	NA	NA	0.268902	NA	1
P17844	354	DDX5	DDX5_C354	DDX5_HUMAN Probable ATP-dependent RNA helicase DDX5 OS=Homo sapiens OX=9606 GN=DDX5 PE=1 SV=1	R	NA	C#DELTR	NA	NA	1	NA	NA	0.272611	NA	1
O14787	93	TNPO2	TNPO2_C93	TNPO2_HUMAN Transportin-2 OS=Homo sapiens OX=9606 GN=TNPO2 PE=1 SV=3	E	NA	C#LNNIGDASSLIR	NA	NA	1	NA	NA	0.273139	NA	1
O00410	750	IPO5	IPO5_C750	IPO5_HUMAN Importin-5 OS=Homo sapiens OX=9606 GN=IPO5 PE=1 SV=4	M	NA	C#DALIK	NA	NA	1	NA	NA	0.276612	NA	1
Q9P258	305	RCC2	RCC2_C305	RCC2_HUMAN Protein RCC2 OS=Homo sapiens OX=9606 GN=RCC2 PE=1 SV=2	D	NA	C#ELVPR	NA	NA	1	NA	NA	0.280525	NA	1
Q09028	167	RBBP4	RBBP4_C167	RBBP4_HUMAN Histone-binding protein RBBP4 OS=Homo sapiens OX=9606 GN=RBBP4 PE=1 SV=3	E	NA	C#NPDLR	NA	NA	1	NA	NA	0.283885	NA	1
Q9C0D5	1594	TANC1	TANC1_C1594	TANC1_HUMAN Protein TANC1 OS=Homo sapiens OX=9606 GN=TANC1 PE=1 SV=3	G	NA	C#GHFGDR	NA	NA	1	NA	NA	0.287314	NA	1
Q96RE7	178	NACC1	NACC1_C178	NACC1_HUMAN Nucleus accumbens-associated protein 1 OS=Homo sapiens OX=9606 GN=NACC1 PE=1 SV=1	Q	NA	C#MPVAK	NA	NA	2	NA	NA	0.311831	NA	1
O75396	75	SEC22B	SEC22B_C75	SC22B_HUMAN Vesicle-trafficking protein SEC22b OS=Homo sapiens OX=9606 GN=SEC22B PE=1 SV=4	L	NA	C#EAAFPK	NA	NA	1	NA	NA	0.300278	NA	1
Q6GMV3	118	PTRHD1	PTRHD1_C118	PTRD1_HUMAN Putative peptidyl-tRNA hydrolase PTRHD1 OS=Homo sapiens OX=9606 GN=PTRHD1 PE=1 SV=1	T	NA	C#IALRPYPK	NA	NA	1	NA	NA	0.305024	NA	1
P78527	1629	PRKDC	PRKDC_C1629	PRKDC_HUMAN DNA-dependent protein kinase catalytic subunit OS=Homo sapiens OX=9606 GN=PRKDC PE=1 SV=3	K	NA	C#DSWWAK	NA	NA	1	NA	NA	0.312578	NA	1
Q9P258	144	RCC2	RCC2_C144	RCC2_HUMAN Protein RCC2 OS=Homo sapiens OX=9606 GN=RCC2 PE=1 SV=2	G	NA	C#LAGVR	NA	NA	1	NA	NA	0.313576	NA	1
Q9BW92	240	TARS2	TARS2_C240	SYTM_HUMAN Threonine--tRNA ligase, mitochondrial OS=Homo sapiens OX=9606 GN=TARS2 PE=1 SV=1	L	NA	C#QGPHLR	NA	NA	1	NA	NA	0.316269	NA	1
Q92922	164	SMARCC1	SMARCC1_C164	SMRC1_HUMAN SWI/SNF complex subunit SMARCC1 OS=Homo sapiens OX=9606 GN=SMARCC1 PE=1 SV=3	N	NA	C#LTRPN	NA	NA	1	NA	NA	0.316671	NA	1
Q9UPN3	4437	MACF1	MACF1_C4437	MACF1_HUMAN Microtubule-actin cross-linking factor 1, isoforms 1/2/3/5 OS=Homo sapiens OX=9606 GN=MACF1 PE=1 SV=4	Q	NA	C#DMSDVNLK	NA	NA	1	NA	NA	0.318053	NA	1
Q9NVH0	566	EXD2	EXD2_C566	EXD2_HUMAN Exonuclease 3'-5' domain-containing protein 2 OS=Homo sapiens OX=9606 GN=EXD2 PE=1 SV=2	Q	NA	C#HSQGGLR	NA	NA	1	NA	NA	0.32206	NA	1
Q9UHN1	196	POLG2	POLG2_C196	DPOG2_HUMAN DNA polymerase subunit gamma-2, mitochondrial OS=Homo sapiens OX=9606 GN=POLG2 PE=1 SV=1	N	NA	C#LDLVNK	NA	NA	1	NA	NA	0.322491	NA	1
O43482	12	OIP5	OIP5_C12	MS18B_HUMAN Protein Mis18-beta OS=Homo sapiens OX=9606 GN=OIP5 PE=1 SV=2	R	NA	C#ATPPR	NA	NA	1	NA	NA	0.324801	NA	1
P23471	1933	PTPRZ1	PTPRZ1_C1933	PTPRZ_HUMAN Receptor-type tyrosine-protein phosphatase zeta OS=Homo sapiens OX=9606 GN=PTPRZ1 PE=1 SV=4	H	NA	C#SAGVGR	NA	NA	1	NA	NA	0.327967	NA	1
Q7Z4Q2	655	HEATR3	HEATR3_C655	HEAT3_HUMAN HEAT repeat-containing protein 3 OS=Homo sapiens OX=9606 GN=HEATR3 PE=1 SV=2	L	NA	C#VLDNVK	NA	NA	1	NA	NA	0.33041	NA	1
Q8N3U4	535	STAG2	STAG2_C535	STAG2_HUMAN Cohesin subunit SA-2 OS=Homo sapiens OX=9606 GN=STAG2 PE=1 SV=3	E	NA	C#HPPVGR	NA	NA	1	NA	NA	0.331337	NA	1
Q92990	218	GLMN	GLMN_C218	GLMN_HUMAN Glomulin OS=Homo sapiens OX=9606 GN=GLMN PE=1 SV=2	K	NA	C#PLLTAQ	NA	NA	1	NA	NA	0.331531	NA	1
O60341	360	KDM1A	KDM1A_C360	KDM1A_HUMAN Lysine-specific histone demethylase 1A OS=Homo sapiens OX=9606 GN=KDM1A PE=1 SV=2	K	NA	C#PLYEAN	NA	NA	2	NA	NA	0.349511	NA	1
Q9BQ39	369	DDX50	DDX50_C369	DDX50_HUMAN ATP-dependent RNA helicase DDX50 OS=Homo sapiens OX=9606 GN=DDX50 PE=1 SV=1	Q	NA	C#HWSQR	NA	NA	1	NA	NA	0.335044	NA	1
Q9H6F5	127	CCDC86	CCDC86_C127	CCD86_HUMAN Coiled-coil domain-containing protein 86 OS=Homo sapiens OX=9606 GN=CCDC86 PE=1 SV=1	K	NA	C#SQDQGVLA	NA	NA	1	NA	NA	0.340207	NA	1
Q9NYH9	381	UTP6	UTP6_C381	UTP6_HUMAN U3 small nucleolar RNA-associated protein 6 homolog OS=Homo sapiens OX=9606 GN=UTP6 PE=2 SV=2	L	NA	C#YNFLR	NA	NA	1	NA	NA	0.340901	NA	1
P78527	795	PRKDC	PRKDC_C795	PRKDC_HUMAN DNA-dependent protein kinase catalytic subunit OS=Homo sapiens OX=9606 GN=PRKDC PE=1 SV=3	P	NA	C#LDGYLK	NA	NA	1	NA	NA	0.343599	NA	1
Q53HC5	603	KLHL26	KLHL26_C603	KLH26_HUMAN Kelch-like protein 26 OS=Homo sapiens OX=9606 GN=KLHL26 PE=1 SV=2	A	NA	C#APVLLPR	NA	NA	1	NA	NA	0.35008	NA	1
Q9BTA9	553	WAC	WAC_C553	WAC_HUMAN WW domain-containing adapter protein with coiled-coil OS=Homo sapiens OX=9606 GN=WAC PE=1 SV=3	T	NA	C#SLTPALAA	NA	NA	1	NA	NA	0.350806	NA	1
P30536	19	TSPO	TSPO_C19	TSPO_HUMAN Translocator protein OS=Homo sapiens OX=9606 GN=TSPO PE=1 SV=3	G	NA	C#FVGSR	NA	NA	1	NA	NA	0.355381	NA	1
Q6RFH5	49	WDR74	WDR74_C49	WDR74_HUMAN WD repeat-containing protein 74 OS=Homo sapiens OX=9606 GN=WDR74 PE=1 SV=1	L	NA	C#WGTGGETQ	NA	NA	1	NA	NA	0.360067	NA	1
O75530	409	EED	EED_C409	EED_HUMAN Polycomb protein EED OS=Homo sapiens OX=9606 GN=EED PE=1 SV=2	K	NA	C#GAAIR	NA	NA	1	NA	NA	0.360243	NA	1
Q14566	351	MCM6	MCM6_C351	MCM6_HUMAN DNA replication licensing factor MCM6 OS=Homo sapiens OX=9606 GN=MCM6 PE=1 SV=1	L	NA	C#TSLFPTIH	NA	NA	1	NA	NA	0.364141	NA	1
Q9BYW2	2485	SETD2	SETD2_C2485	SETD2_HUMAN Histone-lysine N-methyltransferase SETD2 OS=Homo sapiens OX=9606 GN=SETD2 PE=1 SV=3	Q	NA	C#LNPYR	NA	NA	1	NA	NA	0.364179	NA	1
Q5JPH6	386	EARS2	EARS2_C386	SYEM_HUMAN Probable glutamate--tRNA ligase, mitochondrial OS=Homo sapiens OX=9606 GN=EARS2 PE=1 SV=2	G	NA	C#QLQNR	NA	NA	1	NA	NA	0.367151	NA	1
Q7Z2E3	161	APTX	APTX_C161	APTX_HUMAN Aprataxin OS=Homo sapiens OX=9606 GN=APTX PE=1 SV=2	Q	NA	C#SVPLKK	NA	NA	1	NA	NA	0.368636	NA	1
Q8NCM8	1540	DYNC2H1	DYNC2H1_C1540	DYHC2_HUMAN Cytoplasmic dynein 2 heavy chain 1 OS=Homo sapiens OX=9606 GN=DYNC2H1 PE=1 SV=4	L	NA	C#LAEQIK	NA	NA	1	NA	NA	0.374783	NA	1
P82279	851	CRB1	CRB1_C851	CRUM1_HUMAN Protein crumbs homolog 1 OS=Homo sapiens OX=9606 GN=CRB1 PE=1 SV=2	G	NA	C#IQDVR	NA	NA	1	NA	NA	0.375954	NA	1
Q8IW92	562	GLB1L2	GLB1L2_C562	GLBL2_HUMAN Beta-galactosidase-1-like protein 2 OS=Homo sapiens OX=9606 GN=GLB1L2 PE=2 SV=1	P	NA	C#DTFIK	NA	NA	1	NA	NA	0.376135	NA	1
Q14151	464	SAFB2	SAFB2_C464	SAFB2_HUMAN Scaffold attachment factor B2 OS=Homo sapiens OX=9606 GN=SAFB2 PE=1 SV=1	K	NA	C#ISHLHR	NA	NA	1	NA	NA	0.387847	NA	1
Q9NVE7	537	PANK4	PANK4_C537	PANK4_HUMAN Pantothenate kinase 4 OS=Homo sapiens OX=9606 GN=PANK4 PE=1 SV=1	R	NA	C#FPGVVR	NA	NA	1	NA	NA	0.391115	NA	1
P35606	56	COPB2	COPB2_C56	COPB2_HUMAN Coatomer subunit beta' OS=Homo sapiens OX=9606 GN=COPB2 PE=1 SV=2	V	NA	C#DLPVR	NA	NA	1	NA	NA	0.398802	NA	1
Q92616	907	GCN1	GCN1_C907	GCN1_HUMAN eIF-2-alpha kinase activator GCN1 OS=Homo sapiens OX=9606 GN=GCN1 PE=1 SV=6	A	NA	C#VMPSR	NA	NA	1	NA	NA	0.399369	NA	1
O75369	2501	FLNB	FLNB_C2501	FLNB_HUMAN Filamin-B OS=Homo sapiens OX=9606 GN=FLNB PE=1 SV=2	T	NA	C#YSAIPK	NA	NA	1	NA	NA	0.399812	NA	1
P08238	366	HSP90AB1	HSP90AB1_C366	HS90B_HUMAN Heat shock protein HSP 90-beta OS=Homo sapiens OX=9606 GN=HSP90AB1 PE=1 SV=4	S	NA	C#DELIPEYLNFIR	NA	NA	1	NA	NA	0.404567	NA	1
O95782	283	AP2A1	AP2A1_C283	AP2A1_HUMAN AP-2 complex subunit alpha-1 OS=Homo sapiens OX=9606 GN=AP2A1 PE=1 SV=3	E	NA	C#LETVLNK	NA	NA	1	NA	NA	0.407347	NA	1
Q8IY67	255	RAVER1	RAVER1_C255	RAVR1_HUMAN Ribonucleoprotein PTB-binding 1 OS=Homo sapiens OX=9606 GN=RAVER1 PE=1 SV=1	A	NA	NA	C#GQDGQLK	NA	NA	2	NA	NA	0.0438288	1
O60832	74	DKC1	DKC1_C74	DKC1_HUMAN H/ACA ribonucleoprotein complex subunit DKC1 OS=Homo sapiens OX=9606 GN=DKC1 PE=1 SV=3	A	NA	NA	C#GSNPLKR	NA	NA	1	NA	NA	0.257512	1
P30046	24	DDT	DDT_C24	DOPD_HUMAN D-dopachrome decarboxylase OS=Homo sapiens OX=9606 GN=DDT PE=1 SV=3	L	NA	NA	C#AAAASILGK	NA	NA	1	NA	NA	0.0611854	1
Q9P2F9	451	ZNF319	ZNF319_C451	ZN319_HUMAN Zinc finger protein 319 OS=Homo sapiens OX=9606 GN=ZNF319 PE=1 SV=2	H	NA	NA	C#AAAEKPLR	NA	NA	1	NA	NA	0.138553	1
Q8WU58	487	FAM222B	FAM222B_C487	F222B_HUMAN Protein FAM222B OS=Homo sapiens OX=9606 GN=FAM222B PE=2 SV=1	D	NA	NA	C#AAAPGAHYR	NA	NA	1	NA	NA	0.0213561	1
O15068	68	MCF2L	MCF2L_C68	MCF2L_HUMAN Guanine nucleotide exchange factor DBS OS=Homo sapiens OX=9606 GN=MCF2L PE=1 SV=2	L	NA	NA	C#AADIQDQLK	NA	NA	1	NA	NA	0.0284554	1
O75643	1580	SNRNP200	SNRNP200_C1580	U520_HUMAN U5 small nuclear ribonucleoprotein 200 kDa helicase OS=Homo sapiens OX=9606 GN=SNRNP200 PE=1 SV=2	T	NA	NA	C#AADIQR	NA	NA	1	NA	NA	0.0383797	1
P38398	805	BRCA1	BRCA1_C805	BRCA1_HUMAN Breast cancer type 1 susceptibility protein OS=Homo sapiens OX=9606 GN=BRCA1 PE=1 SV=2	Q	NA	NA	C#AAFENPK	NA	NA	1	NA	NA	0.223456	1
Q14203	1252	DCTN1	DCTN1_C1252	DCTN1_HUMAN Dynactin subunit 1 OS=Homo sapiens OX=9606 GN=DCTN1 PE=1 SV=3	S	NA	NA	C#AAGFGQR	NA	NA	2	NA	NA	0.186944	1
Q13098	251	GPS1	GPS1_C251	CSN1_HUMAN COP9 signalosome complex subunit 1 OS=Homo sapiens OX=9606 GN=GPS1 PE=1 SV=4	K	NA	NA	C#AAGLAELAAR	NA	NA	1	NA	NA	0.00271737	1
P32322	95	PYCR1	PYCR1_C95	P5CR1_HUMAN Pyrroline-5-carboxylate reductase 1, mitochondrial OS=Homo sapiens OX=9606 GN=PYCR1 PE=1 SV=2	S	NA	NA	C#AAGVTISSIEK	NA	NA	1	NA	NA	0.0775758	1
Q96C36	95	PYCR2	PYCR2_C95	P5CR2_HUMAN Pyrroline-5-carboxylate reductase 2 OS=Homo sapiens OX=9606 GN=PYCR2 PE=1 SV=1	S	NA	NA	C#AAGVTISSVEK	NA	NA	2	NA	NA	0.193689	1
Q96RS6	376	NUDCD1	NUDCD1_C376	NUDC1_HUMAN NudC domain-containing protein 1 OS=Homo sapiens OX=9606 GN=NUDCD1 PE=1 SV=2	Q	NA	NA	C#AAIAER	NA	NA	1	NA	NA	0.193011	1
P21964	145	COMT	COMT_C145	COMT_HUMAN Catechol O-methyltransferase OS=Homo sapiens OX=9606 GN=COMT PE=1 SV=2	D	NA	NA	C#AAITQR	NA	NA	1	NA	NA	0.2624	1
P39748	163	FEN1	FEN1_C163	FEN1_HUMAN Flap endonuclease 1 OS=Homo sapiens OX=9606 GN=FEN1 PE=1 SV=1	S	NA	NA	C#AALVK	NA	NA	1	NA	NA	0.098408	1
Q6IBS0	141	TWF2	TWF2_C141	TWF2_HUMAN Twinfilin-2 OS=Homo sapiens OX=9606 GN=TWF2 PE=1 SV=2	S	NA	NA	C#AAPAPLTSAER	NA	NA	1	NA	NA	0.00553722	1
Q15417	273	CNN3	CNN3_C273	CNN3_HUMAN Calponin-3 OS=Homo sapiens OX=9606 GN=CNN3 PE=1 SV=1	Y	NA	NA	C#AAPTEPVIHN	NA	NA	1	NA	NA	0.0287357	1
P63244	249	RACK1	RACK1_C249	RACK1_HUMAN Receptor of activated protein C kinase 1 OS=Homo sapiens OX=9606 GN=RACK1 PE=1 SV=3	L	NA	NA	C#AATGPSIK	NA	NA	1	NA	NA	0.0278129	1
Q9NZI7	69	UBP1	UBP1_C69	UBIP1_HUMAN Upstream-binding protein 1 OS=Homo sapiens OX=9606 GN=UBP1 PE=1 SV=1	M	NA	NA	C#AATSPAVK	NA	NA	1	NA	NA	0.00151304	1
Q15020	670	SART3	SART3_C670	SART3_HUMAN Squamous cell carcinoma antigen recognized by T-cells 3 OS=Homo sapiens OX=9606 GN=SART3 PE=1 SV=1	K	NA	NA	C#AAVDVEPPSK	NA	NA	3	NA	NA	0.0158103	1
P49792	3071	RANBP2	RANBP2_C3071	RBP2_HUMAN E3 SUMO-protein ligase RanBP2 OS=Homo sapiens OX=9606 GN=RANBP2 PE=1 SV=2	V	NA	NA	C#ADGEPLGR	NA	NA	1	NA	NA	0.217911	1
Q04446	81	GBE1	GBE1_C81	GLGB_HUMAN 1,4-alpha-glucan-branching enzyme OS=Homo sapiens OX=9606 GN=GBE1 PE=1 SV=3	R	NA	NA	C#ADGGLYCK	NA	NA	2	NA	NA	0.182734	1
Q6PI48	459	DARS2	DARS2_C459	SYDM_HUMAN Aspartate--tRNA ligase, mitochondrial OS=Homo sapiens OX=9606 GN=DARS2 PE=1 SV=1	E	NA	NA	C#ADLLETR	NA	NA	1	NA	NA	0.286504	1
Q06124	104	PTPN11	PTPN11_C104	PTN11_HUMAN Tyrosine-protein phosphatase non-receptor type 11 OS=Homo sapiens OX=9606 GN=PTPN11 PE=1 SV=2	N	NA	NA	C#ADPTSER	NA	NA	1	NA	NA	0.356043	1
Q9Y462	542	ZNF711	ZNF711_C542	ZN711_HUMAN Zinc finger protein 711 OS=Homo sapiens OX=9606 GN=ZNF711 PE=1 SV=2	R	NA	NA	C#ADQSNLK	NA	NA	1	NA	NA	0.0146907	1
P52732	773	KIF11	KIF11_C773	KIF11_HUMAN Kinesin-like protein KIF11 OS=Homo sapiens OX=9606 GN=KIF11 PE=1 SV=2	F	NA	NA	C#ADSDGFSQELR	NA	NA	1	NA	NA	0.195601	1
Q9Y617	98	PSAT1	PSAT1_C98	SERC_HUMAN Phosphoserine aminotransferase OS=Homo sapiens OX=9606 GN=PSAT1 PE=1 SV=2	R	NA	NA	C#ADYVVTGAWSAK	NA	NA	1	NA	NA	0.0739102	1
Q9UQ80	149	PA2G4	PA2G4_C149	PA2G4_HUMAN Proliferation-associated protein 2G4 OS=Homo sapiens OX=9606 GN=PA2G4 PE=1 SV=3	L	NA	NA	C#AEAALR	NA	NA	1	NA	NA	0.0956354	1
Q9BU89	242	DOHH	DOHH_C242	DOHH_HUMAN Deoxyhypusine hydroxylase OS=Homo sapiens OX=9606 GN=DOHH PE=1 SV=1	E	NA	NA	C#AEALGAIAR	NA	NA	1	NA	NA	0.0126435	1
O43663	322	PRC1	PRC1_C322	PRC1_HUMAN Protein regulator of cytokinesis 1 OS=Homo sapiens OX=9606 GN=PRC1 PE=1 SV=2	F	NA	NA	C#AEDYTESLLQLHDAEIVR	NA	NA	1	NA	NA	0.00792018	1
O75663	87	TIPRL	TIPRL_C87	TIPRL_HUMAN TIP41-like protein OS=Homo sapiens OX=9606 GN=TIPRL PE=1 SV=2	A	NA	NA	C#AEEWQESR	NA	NA	1	NA	NA	0.0230162	1
P48147	225	PREP	PREP_C225	PPCE_HUMAN Prolyl endopeptidase OS=Homo sapiens OX=9606 GN=PREP PE=1 SV=2	L	NA	NA	C#AEFPDEPK	NA	NA	1	NA	NA	0.229545	1
Q9NVM4	595	PRMT7	PRMT7_C595	ANM7_HUMAN Protein arginine N-methyltransferase 7 OS=Homo sapiens OX=9606 GN=PRMT7 PE=1 SV=1	L	NA	NA	C#AEGTVELR	NA	NA	1	NA	NA	0.040161	1
Q9NRH3	26	TUBG2	TUBG2_C26	TBG2_HUMAN Tubulin gamma-2 chain OS=Homo sapiens OX=9606 GN=TUBG2 PE=2 SV=1	L	NA	NA	C#AEHGISPEGIVEEF	NA	NA	1	NA	NA	0.29001	1
P62910	96	RPL32	RPL32_C96	RL32_HUMAN 60S ribosomal protein L32 OS=Homo sapiens OX=9606 GN=RPL32 PE=1 SV=2	Y	NA	NA	C#AEIAHNVSSK	NA	NA	1	NA	NA	0.00419111	1
Q96G46	377	DUS3L	DUS3L_C377	DUS3L_HUMAN tRNA-dihydrouridine(47) synthase [NAD(P)(+)]-like OS=Homo sapiens OX=9606 GN=DUS3L PE=1 SV=2	K	NA	NA	C#AELLSR	NA	NA	1	NA	NA	0.0747655	1
Q96EB1	271	ELP4	ELP4_C271	ELP4_HUMAN Elongator complex protein 4 OS=Homo sapiens OX=9606 GN=ELP4 PE=1 SV=2	C	NA	NA	C#AENGGNSHSLTK	NA	NA	1	NA	NA	0.0515567	1
P53041	11	PPP5C	PPP5C_C11	PPP5_HUMAN Serine/threonine-protein phosphatase 5 OS=Homo sapiens OX=9606 GN=PPP5C PE=1 SV=1	E	NA	NA	C#AEPPRDEPPADGALK C#AEPPRDEPPADGALKR	NA	NA	6	NA	NA	0.0042931	1
Q9NXE4	614	SMPD4	SMPD4_C614	NSMA3_HUMAN Sphingomyelin phosphodiesterase 4 OS=Homo sapiens OX=9606 GN=SMPD4 PE=1 SV=3	Q	NA	NA	C#AESPAGH	NA	NA	1	NA	NA	0.155424	1
Q8WVY7	154	UBLCP1	UBLCP1_C154	UBCP1_HUMAN Ubiquitin-like domain-containing CTD phosphatase 1 OS=Homo sapiens OX=9606 GN=UBLCP1 PE=1 SV=2	S	NA	NA	C#AETGVELMRPY	NA	NA	1	NA	NA	0.0453931	1
Q9NSE4	1005	IARS2	IARS2_C1005	SYIM_HUMAN Isoleucine--tRNA ligase, mitochondrial OS=Homo sapiens OX=9606 GN=IARS2 PE=1 SV=2	R	NA	NA	C#AEVVSGK	NA	NA	1	NA	NA	0.0319225	1
Q9UJX2	537	CDC23	CDC23_C537	CDC23_HUMAN Cell division cycle protein 23 homolog OS=Homo sapiens OX=9606 GN=CDC23 PE=1 SV=3	C	NA	NA	C#AFNDTR	NA	NA	1	NA	NA	0.123501	1
Q96L21	105	RPL10L	RPL10L_C105	RL10L_HUMAN 60S ribosomal protein L10-like OS=Homo sapiens OX=9606 GN=RPL10L PE=1 SV=3	S	NA	NA	C#AGADRL	NA	NA	1	NA	NA	0.190758	1
Q9H553	70	ALG2	ALG2_C70	ALG2_HUMAN Alpha-1,3/1,6-mannosyltransferase ALG2 OS=Homo sapiens OX=9606 GN=ALG2 PE=1 SV=1	R	NA	NA	C#AGDWLPR	NA	NA	1	NA	NA	0.0689854	1
Q6NVY1	95	HIBCH	HIBCH_C95	HIBCH_HUMAN 3-hydroxyisobutyryl-CoA hydrolase, mitochondrial OS=Homo sapiens OX=9606 GN=HIBCH PE=1 SV=2	F	NA	NA	C#AGGDIR	NA	NA	1	NA	NA	0.18049	1
P49916	729	LIG3	LIG3_C729	DNLI3_HUMAN DNA ligase 3 OS=Homo sapiens OX=9606 GN=LIG3 PE=1 SV=2	K	NA	NA	C#AGGHDDATLAR C#AGGHDDATLA	NA	NA	3	NA	NA	0.00182038	1
Q99714	91	HSD17B10	HSD17B10_C91	HCD2_HUMAN 3-hydroxyacyl-CoA dehydrogenase type-2 OS=Homo sapiens OX=9606 GN=HSD17B10 PE=1 SV=3	N	NA	NA	C#AGIAVASK	NA	NA	1	NA	NA	0.0126831	1
P50579	290	METAP2	METAP2_C290	MAP2_HUMAN Methionine aminopeptidase 2 OS=Homo sapiens OX=9606 GN=METAP2 PE=1 SV=1	K	NA	NA	C#AGIDVR	NA	NA	1	NA	NA	0.0897803	1
Q9H9P8	258	L2HGDH	L2HGDH_C258	L2HDH_HUMAN L-2-hydroxyglutarate dehydrogenase, mitochondrial OS=Homo sapiens OX=9606 GN=L2HGDH PE=1 SV=3	T	NA	NA	C#AGLYSDR	NA	NA	1	NA	NA	0.150077	1
Q99614	28	TTC1	TTC1_C28	TTC1_HUMAN Tetratricopeptide repeat protein 1 OS=Homo sapiens OX=9606 GN=TTC1 PE=1 SV=1	E	NA	NA	C#AGPPVPDPK	NA	NA	3	NA	NA	0.21414	1
Q5XUX0	55	FBXO31	FBXO31_C55	FBX31_HUMAN F-box only protein 31 OS=Homo sapiens OX=9606 GN=FBXO31 PE=1 SV=2	L	NA	NA	C#AGPSPPPPR	NA	NA	1	NA	NA	0.0156528	1
Q8NBF2	609	NHLRC2	NHLRC2_C609	NHLC2_HUMAN NHL repeat-containing protein 2 OS=Homo sapiens OX=9606 GN=NHLRC2 PE=1 SV=1	A	NA	NA	C#AGQTLQFK	NA	NA	1	NA	NA	0.0206535	1
Q9BQ67	90	GRWD1	GRWD1_C90	GRWD1_HUMAN Glutamate-rich WD repeat-containing protein 1 OS=Homo sapiens OX=9606 GN=GRWD1 PE=1 SV=1	L	NA	NA	C#AGTQAESAQSNR	NA	NA	2	NA	NA	0.036423	1
Q9H4H8	417	FAM83D	FAM83D_C417	FA83D_HUMAN Protein FAM83D OS=Homo sapiens OX=9606 GN=FAM83D PE=1 SV=3	A	NA	NA	C#AGTQTAVITR	NA	NA	1	NA	NA	0.00745772	1
Q9Y5A9	482	YTHDF2	YTHDF2_C482	YTHD2_HUMAN YTH domain-containing family protein 2 OS=Homo sapiens OX=9606 GN=YTHDF2 PE=1 SV=2	T	NA	NA	C#AGVWSQDK	NA	NA	1	NA	NA	0.0221727	1
Q96F45	451	ZNF503	ZNF503_C451	ZN503_HUMAN Zinc finger protein 503 OS=Homo sapiens OX=9606 GN=ZNF503 PE=1 SV=1	S	NA	NA	C#AHDPAAA C#AHDPAAAAA	NA	NA	2	NA	NA	0.09835	1
P16885	496	PLCG2	PLCG2_C496	PLCG2_HUMAN 1-phosphatidylinositol 4,5-bisphosphate phosphodiesterase gamma-2 OS=Homo sapiens OX=9606 GN=PLCG2 PE=1 SV=4	Y	NA	NA	C#AIADAK	NA	NA	1	NA	NA	0.385806	1
P48200	137	IREB2	IREB2_C137	IREB2_HUMAN Iron-responsive element-binding protein 2 OS=Homo sapiens OX=9606 GN=IREB2 PE=1 SV=4	K	NA	NA	C#AIQNAPNPGGGDLQK	NA	NA	2	NA	NA	0.0155016	1
Q6ZT62	110	BARGIN	BARGIN_C110	BGIN_HUMAN Bargin OS=Homo sapiens OX=9606 GN=BARGIN PE=1 SV=2	S	NA	NA	C#AIQNQLAR	NA	NA	1	NA	NA	0.0784453	1
P07195	36	LDHB	LDHB_C36	LDHB_HUMAN L-lactate dehydrogenase B chain OS=Homo sapiens OX=9606 GN=LDHB PE=1 SV=2	A	NA	NA	C#AISILGK	NA	NA	1	NA	NA	0.23644	1
Q9H4L7	606	SMARCAD1	SMARCAD1_C606	SMRCD_HUMAN SWI/SNF-related matrix-associated actin-dependent regulator of chromatin subfamily A containing DEAD/H box 1 OS=Homo sapiens OX=9606 GN=SMARCAD1 PE=1 SV=2	N	NA	NA	C#AISSSDDR	NA	NA	1	NA	NA	0.110757	1
P48643	429	CCT5	CCT5_C429	TCPE_HUMAN T-complex protein 1 subunit epsilon OS=Homo sapiens OX=9606 GN=CCT5 PE=1 SV=1	S	NA	NA	C#ALAVSQEADK	NA	NA	1	NA	NA	0.0143519	1
Q9BV86	64	NTMT1	NTMT1_C64	NTM1A_HUMAN N-terminal Xaa-Pro-Lys N-methyltransferase 1 OS=Homo sapiens OX=9606 GN=NTMT1 PE=1 SV=3	S	NA	NA	C#ALDCGAGIGR	NA	NA	1	NA	NA	0.0993069	1
P51970	66	NDUFA8	NDUFA8_C66	NDUA8_HUMAN NADH dehydrogenase [ubiquinone] 1 alpha subcomplex subunit 8 OS=Homo sapiens OX=9606 GN=NDUFA8 PE=1 SV=3	K	NA	NA	C#ALDFFR	NA	NA	1	NA	NA	0.156293	1
Q96D46	71	NMD3	NMD3_C71	NMD3_HUMAN 60S ribosomal export protein NMD3 OS=Homo sapiens OX=9606 GN=NMD3 PE=1 SV=1	Q	NA	NA	C#ALESR	NA	NA	1	NA	NA	0.119907	1
P13797	104	PLS3	PLS3_C104	PLST_HUMAN Plastin-3 OS=Homo sapiens OX=9606 GN=PLS3 PE=1 SV=4	I	NA	NA	C#ALGGTSELSSEGTQHSYSEEEK	NA	NA	1	NA	NA	2.31e-05	1
Q14247	246	CTTN	CTTN_C246	SRC8_HUMAN Src substrate cortactin OS=Homo sapiens OX=9606 GN=CTTN PE=1 SV=2	K	NA	NA	C#ALGWDHQEK	NA	NA	2	NA	NA	0.0155792	1
Q6SZW1	233	SARM1	SARM1_C233	SARM1_HUMAN Sterile alpha and TIR motif-containing protein 1 OS=Homo sapiens OX=9606 GN=SARM1 PE=1 SV=1	N	NA	NA	C#ALHGGQAVQR	NA	NA	1	NA	NA	0.00260257	1
P52294	469	KPNA1	KPNA1_C469	IMA5_HUMAN Importin subunit alpha-5 OS=Homo sapiens OX=9606 GN=KPNA1 PE=1 SV=3	Y	NA	NA	C#ALIEEAYGLDK	NA	NA	1	NA	NA	0.0130387	1
P23921	238	RRM1	RRM1_C238	RIR1_HUMAN Ribonucleoside-diphosphate reductase large subunit OS=Homo sapiens OX=9606 GN=RRM1 PE=1 SV=1	Q	NA	NA	C#ALISK	NA	NA	1	NA	NA	0.329142	1
O15371	438	EIF3D	EIF3D_C438	EIF3D_HUMAN Eukaryotic translation initiation factor 3 subunit D OS=Homo sapiens OX=9606 GN=EIF3D PE=1 SV=1	C	NA	NA	C#ALLAGSEYLK	NA	NA	1	NA	NA	0.0168194	1
P29590	215	PML	PML_C215	PML_HUMAN Protein PML OS=Homo sapiens OX=9606 GN=PML PE=1 SV=3	S	NA	NA	C#ALLDSSHSELK	NA	NA	1	NA	NA	0.185467	1
Q5TAX3	204	TUT4	TUT4_C204	TUT4_HUMAN Terminal uridylyltransferase 4 OS=Homo sapiens OX=9606 GN=TUT4 PE=1 SV=3	K	NA	NA	C#ALQNSPR	NA	NA	1	NA	NA	0.138743	1
P26639	467	TARS	TARS_C467	SYTC_HUMAN Threonine--tRNA ligase, cytoplasmic OS=Homo sapiens OX=9606 GN=TARS PE=1 SV=3	F	NA	NA	C#AMEQIEDEIK	NA	NA	1	NA	NA	0.0391951	1
Q12789	1091	GTF3C1	GTF3C1_C1091	TF3C1_HUMAN General transcription factor 3C polypeptide 1 OS=Homo sapiens OX=9606 GN=GTF3C1 PE=1 SV=4	K	NA	NA	C#AMLEYTTGSR	NA	NA	1	NA	NA	0.0049056	1
P28066	76	PSMA5	PSMA5_C76	PSA5_HUMAN Proteasome subunit alpha type-5 OS=Homo sapiens OX=9606 GN=PSMA5 PE=1 SV=3	G	NA	NA	C#AMSGLIADAK	NA	NA	1	NA	NA	0.0162265	1
Q99832	158	CCT7	CCT7_C158	TCPH_HUMAN T-complex protein 1 subunit eta OS=Homo sapiens OX=9606 GN=CCT7 PE=1 SV=2	K	NA	NA	C#AMTALSSK	NA	NA	3	NA	NA	0.00616851	1
Q96EY4	162	TMA16	TMA16_C162	TMA16_HUMAN Translation machinery-associated protein 16 OS=Homo sapiens OX=9606 GN=TMA16 PE=1 SV=2	I	NA	NA	C#ANDAIPK	NA	NA	1	NA	NA	0.189829	1
Q9Y263	208	PLAA	PLAA_C208	PLAP_HUMAN Phospholipase A-2-activating protein OS=Homo sapiens OX=9606 GN=PLAA PE=1 SV=2	S	NA	NA	C#ANDASIR	NA	NA	1	NA	NA	0.0392897	1
Q12789	1363	GTF3C1	GTF3C1_C1363	TF3C1_HUMAN General transcription factor 3C polypeptide 1 OS=Homo sapiens OX=9606 GN=GTF3C1 PE=1 SV=4	V	NA	NA	C#ANEFK	NA	NA	1	NA	NA	0.310931	1
P43487	99	RANBP1	RANBP1_C99	RANG_HUMAN Ran-specific GTPase-activating protein OS=Homo sapiens OX=9606 GN=RANBP1 PE=1 SV=1	I	NA	NA	C#ANHYITPM	NA	NA	2	NA	NA	0.0221777	1
Q9NRF9	51	POLE3	POLE3_C51	DPOE3_HUMAN DNA polymerase epsilon subunit 3 OS=Homo sapiens OX=9606 GN=POLE3 PE=1 SV=1	S	NA	NA	C#ANNFAMK	NA	NA	1	NA	NA	0.0631216	1
P53396	764	ACLY	ACLY_C764	ACLY_HUMAN ATP-citrate synthase OS=Homo sapiens OX=9606 GN=ACLY PE=1 SV=3	A	NA	NA	C#ANQASETAVAK	NA	NA	1	NA	NA	0.000165205	1
Q8WWH5	269	TRUB1	TRUB1_C269	TRUB1_HUMAN Probable tRNA pseudouridine synthase 1 OS=Homo sapiens OX=9606 GN=TRUB1 PE=1 SV=1	S	NA	NA	C#ANVLELTR	NA	NA	2	NA	NA	0.223324	1
Q3KQU3	382	MAP7D1	MAP7D1_C382	MA7D1_HUMAN MAP7 domain-containing protein 1 OS=Homo sapiens OX=9606 GN=MAP7D1 PE=1 SV=1	R	NA	NA	C#APAGER	NA	NA	1	NA	NA	0.122683	1
O00116	413	AGPS	AGPS_C413	ADAS_HUMAN Alkyldihydroxyacetonephosphate synthase, peroxisomal OS=Homo sapiens OX=9606 GN=AGPS PE=1 SV=1	R	NA	NA	C#APASIR	NA	NA	1	NA	NA	0.0899455	1
Q6W2J9	1311	BCOR	BCOR_C1311	BCOR_HUMAN BCL-6 corepressor OS=Homo sapiens OX=9606 GN=BCOR PE=1 SV=1	S	NA	NA	C#APASRPPAK	NA	NA	1	NA	NA	0.0479216	1
Q8TDY2	1413	RB1CC1	RB1CC1_C1413	RBCC1_HUMAN RB1-inducible coiled-coil protein 1 OS=Homo sapiens OX=9606 GN=RB1CC1 PE=1 SV=3	A	NA	NA	C#APELPGESDR	NA	NA	1	NA	NA	0.277673	1
Q8IU81	239	IRF2BP1	IRF2BP1_C239	I2BP1_HUMAN Interferon regulatory factor 2-binding protein 1 OS=Homo sapiens OX=9606 GN=IRF2BP1 PE=1 SV=1	A	NA	NA	C#APFNVR	NA	NA	1	NA	NA	0.213483	1
Q9UPQ3	417	AGAP1	AGAP1_C417	AGAP1_HUMAN Arf-GAP with GTPase, ANK repeat and PH domain-containing protein 1 OS=Homo sapiens OX=9606 GN=AGAP1 PE=1 SV=4	A	NA	NA	C#APISSPK	NA	NA	1	NA	NA	0.147639	1
Q13387	415	MAPK8IP2	MAPK8IP2_C415	JIP2_HUMAN C-Jun-amino-terminal kinase-interacting protein 2 OS=Homo sapiens OX=9606 GN=MAPK8IP2 PE=1 SV=2	L	NA	NA	C#APPPPAPAAPR	NA	NA	1	NA	NA	0.32307	1
Q9UGH3	406	SLC23A2	SLC23A2_C406	S23A2_HUMAN Solute carrier family 23 member 2 OS=Homo sapiens OX=9606 GN=SLC23A2 PE=1 SV=1	S	NA	NA	C#APPPPIHAINR	NA	NA	1	NA	NA	0.081201	1
Q14679	261	TTLL4	TTLL4_C261	TTLL4_HUMAN Tubulin polyglutamylase TTLL4 OS=Homo sapiens OX=9606 GN=TTLL4 PE=1 SV=2	D	NA	NA	C#APQPVDHK	NA	NA	1	NA	NA	0.0698718	1
Q7L2J0	54	MEPCE	MEPCE_C54	MEPCE_HUMAN 7SK snRNA methylphosphate capping enzyme OS=Homo sapiens OX=9606 GN=MEPCE PE=1 SV=1	R	NA	NA	C#APSAGSPAAAVGR	NA	NA	1	NA	NA	0.318242	1
Q9Y2I1	895	NISCH	NISCH_C895	NISCH_HUMAN Nischarin OS=Homo sapiens OX=9606 GN=NISCH PE=1 SV=3	C	NA	NA	C#APSEAVK	NA	NA	1	NA	NA	0.0188203	1
Q9Y2H6	465	FNDC3A	FNDC3A_C465	FND3A_HUMAN Fibronectin type-III domain-containing protein 3A OS=Homo sapiens OX=9606 GN=FNDC3A PE=1 SV=4	G	NA	NA	C#APSMPASPVLTK	NA	NA	1	NA	NA	0.328906	1
O75330	17	HMMR	HMMR_C17	HMMR_HUMAN Hyaluronan mediated motility receptor OS=Homo sapiens OX=9606 GN=HMMR PE=1 SV=2	G	NA	NA	C#APSPGAYDVK	NA	NA	1	NA	NA	0.360469	1
Q8WYP5	1412	AHCTF1	AHCTF1_C1412	ELYS_HUMAN Protein ELYS OS=Homo sapiens OX=9606 GN=AHCTF1 PE=1 SV=3	L	NA	NA	C#APSVYEGK	NA	NA	1	NA	NA	0.155764	1
Q9H814	51	PHAX	PHAX_C51	PHAX_HUMAN Phosphorylated adapter RNA export protein OS=Homo sapiens OX=9606 GN=PHAX PE=1 SV=1	A	NA	NA	C#APVSHY	NA	NA	1	NA	NA	0.324147	1
Q6L8Q7	321	PDE12	PDE12_C321	PDE12_HUMAN 2',5'-phosphodiesterase 12 OS=Homo sapiens OX=9606 GN=PDE12 PE=1 SV=2	Y	NA	NA	C#APYALELDYR	NA	NA	1	NA	NA	0.0965639	1
Q8IXI1	185	RHOT2	RHOT2_C185	MIRO2_HUMAN Mitochondrial Rho GTPase 2 OS=Homo sapiens OX=9606 GN=RHOT2 PE=1 SV=2	A	NA	NA	C#AQALTR	NA	NA	1	NA	NA	0.22339	1
Q9BXJ9	491	NAA15	NAA15_C491	NAA15_HUMAN N-alpha-acetyltransferase 15, NatA auxiliary subunit OS=Homo sapiens OX=9606 GN=NAA15 PE=1 SV=1	E	NA	NA	C#AQAYK	NA	NA	1	NA	NA	0.289299	1
O75410	715	TACC1	TACC1_C715	TACC1_HUMAN Transforming acidic coiled-coil-containing protein 1 OS=Homo sapiens OX=9606 GN=TACC1 PE=1 SV=2	K	NA	NA	C#AQDYLAR	NA	NA	1	NA	NA	0.205939	1
Q13501	113	SQSTM1	SQSTM1_C113	SQSTM_HUMAN Sequestosome-1 OS=Homo sapiens OX=9606 GN=SQSTM1 PE=1 SV=1	P	NA	NA	C#AQEAPR	NA	NA	1	NA	NA	0.0345996	1
O14734	302	ACOT8	ACOT8_C302	ACOT8_HUMAN Acyl-coenzyme A thioesterase 8 OS=Homo sapiens OX=9606 GN=ACOT8 PE=1 SV=1	T	NA	NA	C#AQEGVIR	NA	NA	1	NA	NA	0.047795	1
P39880	802	CUX1	CUX1_C802	CUX1_HUMAN Homeobox protein cut-like 1 OS=Homo sapiens OX=9606 GN=CUX1 PE=1 SV=3	D	NA	NA	C#AQGVLR	NA	NA	1	NA	NA	0.154044	1
P40926	128	MDH2	MDH2_C128	MDHM_HUMAN Malate dehydrogenase, mitochondrial OS=Homo sapiens OX=9606 GN=MDH2 PE=1 SV=3	A	NA	NA	C#AQHCPEAM	NA	NA	1	NA	NA	0.33787	1
O75914	424	PAK3	PAK3_C424	PAK3_HUMAN Serine/threonine-protein kinase PAK 3 OS=Homo sapiens OX=9606 GN=PAK3 PE=1 SV=2	F	NA	NA	C#AQITPEQSK	NA	NA	1	NA	NA	0.0159929	1
Q96ED9	423	HOOK2	HOOK2_C423	HOOK2_HUMAN Protein Hook homolog 2 OS=Homo sapiens OX=9606 GN=HOOK2 PE=1 SV=3	R	NA	NA	C#AQLQPR	NA	NA	1	NA	NA	0.111625	1
O76003	46	GLRX3	GLRX3_C46	GLRX3_HUMAN Glutaredoxin-3 OS=Homo sapiens OX=9606 GN=GLRX3 PE=1 SV=2	Q	NA	NA	C#AQMNEVMAELAK	NA	NA	3	NA	NA	0.00108278	1
Q9Y6H1	124	CHCHD2	CHCHD2_C124	CHCH2_HUMAN Coiled-coil-helix-coiled-coil-helix domain-containing protein 2 OS=Homo sapiens OX=9606 GN=CHCHD2 PE=1 SV=1	E	NA	NA	C#AQNQGDIK	NA	NA	1	NA	NA	0.0698809	1
Q5TC12	321	ATPAF1	ATPAF1_C321	ATPF1_HUMAN ATP synthase mitochondrial F1 complex assembly factor 1 OS=Homo sapiens OX=9606 GN=ATPAF1 PE=1 SV=1	K	NA	NA	C#AQNQNK	NA	NA	1	NA	NA	0.220805	1
O75044	357	SRGAP2	SRGAP2_C357	SRGP2_HUMAN SLIT-ROBO Rho GTPase-activating protein 2 OS=Homo sapiens OX=9606 GN=SRGAP2 PE=1 SV=3	L	NA	NA	C#AQQPVQSELVQR C#AQQPVQS	NA	NA	3	NA	NA	0.0109397	1
Q9Y263	263	PLAA	PLAA_C263	PLAP_HUMAN Phospholipase A-2-activating protein OS=Homo sapiens OX=9606 GN=PLAA PE=1 SV=2	E	NA	NA	C#AQTIR	NA	NA	1	NA	NA	0.225264	1
Q9HCC0	431	MCCC2	MCCC2_C431	MCCB_HUMAN Methylcrotonoyl-CoA carboxylase beta chain, mitochondrial OS=Homo sapiens OX=9606 GN=MCCC2 PE=1 SV=1	A	NA	NA	C#AQVPK	NA	NA	1	NA	NA	0.2411	1
Q16658	260	FSCN1	FSCN1_C260	FSCN1_HUMAN Fascin OS=Homo sapiens OX=9606 GN=FSCN1 PE=1 SV=3	S	NA	NA	C#AQVVLQAANER	NA	NA	1	NA	NA	0.00176116	1
P18031	121	PTPN1	PTPN1_C121	PTN1_HUMAN Tyrosine-protein phosphatase non-receptor type 1 OS=Homo sapiens OX=9606 GN=PTPN1 PE=1 SV=1	K	NA	NA	C#AQYWPQK	NA	NA	2	NA	NA	0.109346	1
Q8N1G4	390	LRRC47	LRRC47_C390	LRC47_HUMAN Leucine-rich repeat-containing protein 47 OS=Homo sapiens OX=9606 GN=LRRC47 PE=1 SV=1	Y	NA	NA	C#ARPPQDLK	NA	NA	3	NA	NA	0.0682676	1
Q92830	817	KAT2A	KAT2A_C817	KAT2A_HUMAN Histone acetyltransferase KAT2A OS=Homo sapiens OX=9606 GN=KAT2A PE=1 SV=3	R	NA	NA	C#ASALEK	NA	NA	1	NA	NA	0.107621	1
O15446	107	CD3EAP	CD3EAP_C107	RPA34_HUMAN DNA-directed RNA polymerase I subunit RPA34 OS=Homo sapiens OX=9606 GN=CD3EAP PE=1 SV=1	T	NA	NA	C#ASAPQGTLR	NA	NA	1	NA	NA	0.00869564	1
Q96RP9	425	GFM1	GFM1_C425	EFGM_HUMAN Elongation factor G, mitochondrial OS=Homo sapiens OX=9606 GN=GFM1 PE=1 SV=2	D	NA	NA	C#ASGDTFTDK	NA	NA	1	NA	NA	0.0086326	1
Q96F45	437	ZNF503	ZNF503_C437	ZN503_HUMAN Zinc finger protein 503 OS=Homo sapiens OX=9606 GN=ZNF503 PE=1 SV=1	H	NA	NA	C#ASHLAGAA	NA	NA	1	NA	NA	0.0264869	1
Q6P2E9	4	EDC4	EDC4_C4	EDC4_HUMAN Enhancer of mRNA-decapping protein 4 OS=Homo sapiens OX=9606 GN=EDC4 PE=1 SV=1	S	NA	NA	C#ASIDIEDATQHLR	NA	NA	2	NA	NA	0.00889429	1
Q2T9J0	110	TYSND1	TYSND1_C110	TYSD1_HUMAN Peroxisomal leader peptide-processing protease OS=Homo sapiens OX=9606 GN=TYSND1 PE=1 SV=3	Q	NA	NA	C#ASLEPGPPAPSR	NA	NA	1	NA	NA	0.0492515	1
Q9H6S0	1265	YTHDC2	YTHDC2_C1265	YTDC2_HUMAN 3'-5' RNA helicase YTHDC2 OS=Homo sapiens OX=9606 GN=YTHDC2 PE=1 SV=2	P	NA	NA	C#ASPSPPSSGK	NA	NA	1	NA	NA	0.0144084	1
Q15417	173	CNN3	CNN3_C173	CNN3_HUMAN Calponin-3 OS=Homo sapiens OX=9606 GN=CNN3 PE=1 SV=1	K	NA	NA	C#ASQAGMTAYGTR	NA	NA	1	NA	NA	0.00294332	1
Q9UJW0	258	DCTN4	DCTN4_C258	DCTN4_HUMAN Dynactin subunit 4 OS=Homo sapiens OX=9606 GN=DCTN4 PE=1 SV=1	V	NA	NA	C#ASQLYPR	NA	NA	1	NA	NA	0.0441719	1
Q99439	175	CNN2	CNN2_C175	CNN2_HUMAN Calponin-2 OS=Homo sapiens OX=9606 GN=CNN2 PE=1 SV=4	K	NA	NA	C#ASQSGMTAYGTR	NA	NA	1	NA	NA	0.0118399	1
Q9BQ52	374	ELAC2	ELAC2_C374	RNZ2_HUMAN Zinc phosphodiesterase ELAC protein 2 OS=Homo sapiens OX=9606 GN=ELAC2 PE=1 SV=2	N	NA	NA	C#ASVHNLR	NA	NA	1	NA	NA	0.394749	1
P48735	113	IDH2	IDH2_C113	IDHP_HUMAN Isocitrate dehydrogenase [NADP], mitochondrial OS=Homo sapiens OX=9606 GN=IDH2 PE=1 SV=2	K	NA	NA	C#ATITPDEAR	NA	NA	1	NA	NA	0.0163496	1
Q9HCM4	385	EPB41L5	EPB41L5_C385	E41L5_HUMAN Band 4.1-like protein 5 OS=Homo sapiens OX=9606 GN=EPB41L5 PE=1 SV=3	A	NA	NA	C#ATKPEELSVH	NA	NA	1	NA	NA	0.0868046	1
O00186	185	STXBP3	STXBP3_C185	STXB3_HUMAN Syntaxin-binding protein 3 OS=Homo sapiens OX=9606 GN=STXBP3 PE=1 SV=2	V	NA	NA	C#ATLDENPGVR	NA	NA	1	NA	NA	0.0443461	1
P52789	517	HK2	HK2_C517	HXK2_HUMAN Hexokinase-2 OS=Homo sapiens OX=9606 GN=HK2 PE=1 SV=2	V	NA	NA	C#ATPDGTEK	NA	NA	1	NA	NA	0.243877	1
Q9ULW0	145	TPX2	TPX2_C145	TPX2_HUMAN Targeting protein for Xklp2 OS=Homo sapiens OX=9606 GN=TPX2 PE=1 SV=2	R	NA	NA	C#ATPVIIDEILPSK	NA	NA	1	NA	NA	0.0750892	1
P63167	24	DYNLL1	DYNLL1_C24	DYL1_HUMAN Dynein light chain 1, cytoplasmic OS=Homo sapiens OX=9606 GN=DYNLL1 PE=1 SV=1	E	NA	NA	C#ATQALEK	NA	NA	1	NA	NA	0.0133	1
O95071	2267	UBR5	UBR5_C2267	UBR5_HUMAN E3 ubiquitin-protein ligase UBR5 OS=Homo sapiens OX=9606 GN=UBR5 PE=1 SV=2	R	NA	NA	C#ATTPMAVHR	NA	NA	2	NA	NA	0.0281757	1
Q9UBX3	240	SLC25A10	SLC25A10_C240	DIC_HUMAN Mitochondrial dicarboxylate carrier OS=Homo sapiens OX=9606 GN=SLC25A10 PE=1 SV=2	H	NA	NA	C#AVETAK	NA	NA	1	NA	NA	0.0711709	1
P53621	254	COPA	COPA_C254	COPA_HUMAN Coatomer subunit alpha OS=Homo sapiens OX=9606 GN=COPA PE=1 SV=2	S	NA	NA	C#AVFHPR	NA	NA	1	NA	NA	0.326397	1
P55060	842	CSE1L	CSE1L_C842	XPO2_HUMAN Exportin-2 OS=Homo sapiens OX=9606 GN=CSE1L PE=1 SV=3	I	NA	NA	C#AVGITK	NA	NA	2	NA	NA	0.207337	1
P49585	37	PCYT1A	PCYT1A_C37	PCY1A_HUMAN Choline-phosphate cytidylyltransferase A OS=Homo sapiens OX=9606 GN=PCYT1A PE=1 SV=2	R	NA	NA	C#AVGLR	NA	NA	1	NA	NA	0.262424	1
Q8WTW3	72	COG1	COG1_C72	COG1_HUMAN Conserved oligomeric Golgi complex subunit 1 OS=Homo sapiens OX=9606 GN=COG1 PE=1 SV=1	R	NA	NA	C#AVGLVDAVK	NA	NA	1	NA	NA	0.00519743	1
O43747	160	AP1G1	AP1G1_C160	AP1G1_HUMAN AP-1 complex subunit gamma-1 OS=Homo sapiens OX=9606 GN=AP1G1 PE=1 SV=5	L	NA	NA	C#AVHVIR	NA	NA	1	NA	NA	0.0295292	1
Q8TCT0	21	CERK	CERK_C21	CERK1_HUMAN Ceramide kinase OS=Homo sapiens OX=9606 GN=CERK PE=1 SV=1	R	NA	NA	C#AVSLEPAR	NA	NA	2	NA	NA	0.0957014	1
Q3SY69	683	ALDH1L2	ALDH1L2_C683	AL1L2_HUMAN Mitochondrial 10-formyltetrahydrofolate dehydrogenase OS=Homo sapiens OX=9606 GN=ALDH1L2 PE=1 SV=2	S	NA	NA	C#AVSNLK	NA	NA	1	NA	NA	0.135156	1
Q6P087	172	RPUSD3	RPUSD3_C172	RUSD3_HUMAN Mitochondrial mRNA pseudouridine synthase RPUSD3 OS=Homo sapiens OX=9606 GN=RPUSD3 PE=1 SV=3	Y	NA	NA	C#AVTDGIPAASEGK	NA	NA	1	NA	NA	0.12805	1
Q9Y490	575	TLN1	TLN1_C575	TLN1_HUMAN Talin-1 OS=Homo sapiens OX=9606 GN=TLN1 PE=1 SV=3	G	NA	NA	C#AVTTISSNLTEMSR	NA	NA	1	NA	NA	0.00471477	1
Q9NYH9	310	UTP6	UTP6_C310	UTP6_HUMAN U3 small nucleolar RNA-associated protein 6 homolog OS=Homo sapiens OX=9606 GN=UTP6 PE=2 SV=2	C	NA	NA	C#AVYEEAVK	NA	NA	1	NA	NA	0.020771	1
Q96T76	286	MMS19	MMS19_C286	MMS19_HUMAN MMS19 nucleotide excision repair protein homolog OS=Homo sapiens OX=9606 GN=MMS19 PE=1 SV=2	C	NA	NA	C#AVYGQK	NA	NA	1	NA	NA	0.109143	1
P04818	180	TYMS	TYMS_C180	TYSY_HUMAN Thymidylate synthase OS=Homo sapiens OX=9606 GN=TYMS PE=1 SV=3	M	NA	NA	C#AWNPR	NA	NA	2	NA	NA	0.336363	1
Q9NYZ3	416	GTSE1	GTSE1_C416	GTSE1_HUMAN G2 and S phase-expressed protein 1 OS=Homo sapiens OX=9606 GN=GTSE1 PE=1 SV=3	S	NA	NA	C#AWSESSQLNK	NA	NA	1	NA	NA	0.0801265	1
Q8TEQ6	1051	GEMIN5	GEMIN5_C1051	GEMI5_HUMAN Gem-associated protein 5 OS=Homo sapiens OX=9606 GN=GEMIN5 PE=1 SV=3	T	NA	NA	C#AYDAAK	NA	NA	1	NA	NA	0.150856	1
O00186	546	STXBP3	STXBP3_C546	STXB3_HUMAN Syntaxin-binding protein 3 OS=Homo sapiens OX=9606 GN=STXBP3 PE=1 SV=2	R	NA	NA	C#AYEVSQAHK	NA	NA	2	NA	NA	0.0521848	1
Q6P996	135	PDXDC1	PDXDC1_C135	PDXD1_HUMAN Pyridoxal-dependent decarboxylase domain-containing protein 1 OS=Homo sapiens OX=9606 GN=PDXDC1 PE=1 SV=2	G	NA	NA	C#AYFHEEER	NA	NA	1	NA	NA	0.356149	1
Q96FZ2	18	HMCES	HMCES_C18	HMCES_HUMAN Abasic site processing protein HMCES OS=Homo sapiens OX=9606 GN=HMCES PE=1 SV=1	A	NA	NA	C#AYQDR	NA	NA	1	NA	NA	0.103454	1
Q6YN16	166	HSDL2	HSDL2_C166	HSDL2_HUMAN Hydroxysteroid dehydrogenase-like protein 2 OS=Homo sapiens OX=9606 GN=HSDL2 PE=1 SV=1	H	NA	NA	C#AYTIAK	NA	NA	1	NA	NA	0.196075	1
P18077	47	RPL35A	RPL35A_C47	RL35A_HUMAN 60S ribosomal protein L35a OS=Homo sapiens OX=9606 GN=RPL35A PE=1 SV=2	R	NA	NA	C#AYVYK	NA	NA	1	NA	NA	0.140462	1
Q6P1L5	69	FAM117B	FAM117B_C69	F117B_HUMAN Protein FAM117B OS=Homo sapiens OX=9606 GN=FAM117B PE=1 SV=2	G	NA	NA	C#CGGASGPAGGGGGGGPR	NA	NA	1	NA	NA	0.185338	1
O95336	32	PGLS	PGLS_C32	6PGL_HUMAN 6-phosphogluconolactonase OS=Homo sapiens OX=9606 GN=PGLS PE=1 SV=2	A	NA	NA	C#CLAGAR	NA	NA	1	NA	NA	0.175439	1
P22314	1039	UBA1	UBA1_C1039	UBA1_HUMAN Ubiquitin-like modifier-activating enzyme 1 OS=Homo sapiens OX=9606 GN=UBA1 PE=1 SV=3	L	NA	NA	C#CNDESGEDVEVPYVR	NA	NA	1	NA	NA	0.135954	1
Q15021	766	NCAPD2	NCAPD2_C766	CND1_HUMAN Condensin complex subunit 1 OS=Homo sapiens OX=9606 GN=NCAPD2 PE=1 SV=3	A	NA	NA	C#CPLER	NA	NA	1	NA	NA	0.355585	1
Q92878	680	RAD50	RAD50_C680	RAD50_HUMAN DNA repair protein RAD50 OS=Homo sapiens OX=9606 GN=RAD50 PE=1 SV=1	S	NA	NA	C#CPVCQR	NA	NA	1	NA	NA	0.240966	1
P30566	304	ADSL	ADSL_C304	PUR8_HUMAN Adenylosuccinate lyase OS=Homo sapiens OX=9606 GN=ADSL PE=1 SV=2	R	NA	NA	C#CSLAR	NA	NA	1	NA	NA	0.315599	1
Q9BV68	15	RNF126	RNF126_C15	RN126_HUMAN E3 ubiquitin-protein ligase RNF126 OS=Homo sapiens OX=9606 GN=RNF126 PE=1 SV=2	H	NA	NA	C#CSVEIVPR	NA	NA	1	NA	NA	0.0264223	1
P31040	190	SDHA	SDHA_C190	SDHA_HUMAN Succinate dehydrogenase [ubiquinone] flavoprotein subunit, mitochondrial OS=Homo sapiens OX=9606 GN=SDHA PE=1 SV=2	C	NA	NA	C#CVADR	NA	NA	1	NA	NA	0.210923	1
P62633	97	CNBP	CNBP_C97	CNBP_HUMAN Cellular nucleic acid-binding protein OS=Homo sapiens OX=9606 GN=CNBP PE=1 SV=1	Q	NA	NA	C#CYNCGK	NA	NA	1	NA	NA	0.240913	1
O94826	588	TOMM70	TOMM70_C588	TOM70_HUMAN Mitochondrial import receptor subunit TOM70 OS=Homo sapiens OX=9606 GN=TOMM70 PE=1 SV=1	L	NA	NA	C#DAAHAQTEVAK	NA	NA	2	NA	NA	0.00639137	1
Q9H2C0	30	GAN	GAN_C30	GAN_HUMAN Gigaxonin OS=Homo sapiens OX=9606 GN=GAN PE=1 SV=1	F	NA	NA	C#DAHLVLDGEEIPVQK	NA	NA	1	NA	NA	0.00282674	1
P78527	1128	PRKDC	PRKDC_C1128	PRKDC_HUMAN DNA-dependent protein kinase catalytic subunit OS=Homo sapiens OX=9606 GN=PRKDC PE=1 SV=3	C	NA	NA	C#DAIDHLCR	NA	NA	1	NA	NA	0.0501284	1
Q9UKA4	428	AKAP11	AKAP11_C428	AKA11_HUMAN A-kinase anchor protein 11 OS=Homo sapiens OX=9606 GN=AKAP11 PE=1 SV=1	L	NA	NA	C#DAPDSPRPVK	NA	NA	1	NA	NA	0.285828	1
Q53RE8	90	ANKRD39	ANKRD39_C90	ANR39_HUMAN Ankyrin repeat domain-containing protein 39 OS=Homo sapiens OX=9606 GN=ANKRD39 PE=1 SV=1	K	NA	NA	C#DAQTHGGATALHR	NA	NA	1	NA	NA	0.00781775	1
Q9BSH4	234	TACO1	TACO1_C234	TACO1_HUMAN Translational activator of cytochrome c oxidase 1 OS=Homo sapiens OX=9606 GN=TACO1 PE=1 SV=1	I	NA	NA	C#DASSLHQVR	NA	NA	1	NA	NA	0.0229978	1
P41250	442	GARS	GARS_C442	GARS_HUMAN Glycine--tRNA ligase OS=Homo sapiens OX=9606 GN=GARS PE=1 SV=3	A	NA	NA	C#DCWDAESK	NA	NA	1	NA	NA	0.154707	1
Q14203	81	DCTN1	DCTN1_C81	DCTN1_HUMAN Dynactin subunit 1 OS=Homo sapiens OX=9606 GN=DCTN1 PE=1 SV=3	T	NA	NA	C#DEGHGIFVR	NA	NA	1	NA	NA	0.0481512	1
O95801	174	TTC4	TTC4_C174	TTC4_HUMAN Tetratricopeptide repeat protein 4 OS=Homo sapiens OX=9606 GN=TTC4 PE=1 SV=3	W	NA	NA	C#DEGLQIDAK	NA	NA	1	NA	NA	0.158328	1
Q5VTR2	905	RNF20	RNF20_C905	BRE1A_HUMAN E3 ubiquitin-protein ligase BRE1A OS=Homo sapiens OX=9606 GN=RNF20 PE=1 SV=2	K	NA	NA	C#DEILMEEIK	NA	NA	1	NA	NA	0.00174175	1
P14866	521	HNRNPL	HNRNPL_C521	HNRPL_HUMAN Heterogeneous nuclear ribonucleoprotein L OS=Homo sapiens OX=9606 GN=HNRNPL PE=1 SV=2	I	NA	NA	C#DELGVK	NA	NA	1	NA	NA	0.289365	1
P35250	255	RFC2	RFC2_C255	RFC2_HUMAN Replication factor C subunit 2 OS=Homo sapiens OX=9606 GN=RFC2 PE=1 SV=3	V	NA	NA	C#DEPHPLLVK	NA	NA	1	NA	NA	0.027703	1
Q6Y7W6	573	GIGYF2	GIGYF2_C573	GGYF2_HUMAN GRB10-interacting GYF protein 2 OS=Homo sapiens OX=9606 GN=GIGYF2 PE=1 SV=1	A	NA	NA	C#DESFQPLGDIMK	NA	NA	1	NA	NA	0.00693662	1
O94763	167	URI1	URI1_C167	RMP_HUMAN Unconventional prefoldin RPB5 interactor 1 OS=Homo sapiens OX=9606 GN=URI1 PE=1 SV=3	K	NA	NA	C#DFEFK	NA	NA	1	NA	NA	0.239297	1
P51659	277	HSD17B4	HSD17B4_C277	DHB4_HUMAN Peroxisomal multifunctional enzyme type 2 OS=Homo sapiens OX=9606 GN=HSD17B4 PE=1 SV=3	I	NA	NA	C#DFENASKPQ	NA	NA	1	NA	NA	0.0953995	1
Q9UIG0	120	BAZ1B	BAZ1B_C120	BAZ1B_HUMAN Tyrosine-protein kinase BAZ1B OS=Homo sapiens OX=9606 GN=BAZ1B PE=1 SV=2	E	NA	NA	C#DFEVGK	NA	NA	1	NA	NA	0.394317	1
Q9Y3D8	81	AK6	AK6_C81	KAD6_HUMAN Adenylate kinase isoenzyme 6 OS=Homo sapiens OX=9606 GN=AK6 PE=1 SV=1	G	NA	NA	C#DFFPER	NA	NA	2	NA	NA	0.253987	1
Q9Y5W9	232	SNX11	SNX11_C232	SNX11_HUMAN Sorting nexin-11 OS=Homo sapiens OX=9606 GN=SNX11 PE=1 SV=2	C	NA	NA	C#DFGRPK	NA	NA	1	NA	NA	0.338744	1
Q9NSY1	197	BMP2K	BMP2K_C197	BMP2K_HUMAN BMP-2-inducible protein kinase OS=Homo sapiens OX=9606 GN=BMP2K PE=1 SV=2	L	NA	NA	C#DFGSATNK	NA	NA	1	NA	NA	0.390669	1
P37837	250	TALDO1	TALDO1_C250	TALDO_HUMAN Transaldolase OS=Homo sapiens OX=9606 GN=TALDO1 PE=1 SV=2	G	NA	NA	C#DFLTISPK	NA	NA	1	NA	NA	0.161896	1
P09496	218	CLTA	CLTA_C218	CLCA_HUMAN Clathrin light chain A OS=Homo sapiens OX=9606 GN=CLTA PE=1 SV=1	L	NA	NA	C#DFNPK	NA	NA	1	NA	NA	0.222762	1
O60942	375	RNGTT	RNGTT_C375	MCE1_HUMAN mRNA-capping enzyme OS=Homo sapiens OX=9606 GN=RNGTT PE=1 SV=1	D	NA	NA	C#DFNVR	NA	NA	1	NA	NA	0.408522	1
Q04760	61	GLO1	GLO1_C61	LGUL_HUMAN Lactoylglutathione lyase OS=Homo sapiens OX=9606 GN=GLO1 PE=1 SV=4	K	NA	NA	C#DFPIMK	NA	NA	1	NA	NA	0.0677485	1
O75380	87	NDUFS6	NDUFS6_C87	NDUS6_HUMAN NADH dehydrogenase [ubiquinone] iron-sulfur protein 6, mitochondrial OS=Homo sapiens OX=9606 GN=NDUFS6 PE=1 SV=1	A	NA	NA	C#DGGGGALGHPK	NA	NA	1	NA	NA	0.0930948	1
P35219	266	CA8	CA8_C266	CAH8_HUMAN Carbonic anhydrase-related protein OS=Homo sapiens OX=9606 GN=CA8 PE=1 SV=3	G	NA	NA	C#DGILGDNFRPTQPLSDR	NA	NA	1	NA	NA	0.245726	1
Q9H0C8	325	ILKAP	ILKAP_C325	ILKAP_HUMAN Integrin-linked kinase-associated serine/threonine phosphatase 2C OS=Homo sapiens OX=9606 GN=ILKAP PE=1 SV=1	A	NA	NA	C#DGLFK	NA	NA	1	NA	NA	0.337873	1
Q9Y5A7	400	NUB1	NUB1_C400	NUB1_HUMAN NEDD8 ultimate buster 1 OS=Homo sapiens OX=9606 GN=NUB1 PE=1 SV=2	A	NA	NA	C#DGNVDHAATHITNR	NA	NA	1	NA	NA	0.114777	1
Q8TB03	145	CXorf38	CXorf38_C145	CX038_HUMAN Uncharacterized protein CXorf38 OS=Homo sapiens OX=9606 GN=CXorf38 PE=1 SV=1	S	NA	NA	C#DHFVVDR	NA	NA	1	NA	NA	0.0898531	1
O60832	358	DKC1	DKC1_C358	DKC1_HUMAN H/ACA ribonucleoprotein complex subunit DKC1 OS=Homo sapiens OX=9606 GN=DKC1 PE=1 SV=3	T	NA	NA	C#DHGIVAK	NA	NA	1	NA	NA	0.0513653	1
Q9UPN3	815	MACF1	MACF1_C815	MACF1_HUMAN Microtubule-actin cross-linking factor 1, isoforms 1/2/3/5 OS=Homo sapiens OX=9606 GN=MACF1 PE=1 SV=4	S	NA	NA	C#DHNTSLSR	NA	NA	2	NA	NA	0.0894	1
P61081	47	UBE2M	UBE2M_C47	UBC12_HUMAN NEDD8-conjugating enzyme Ubc12 OS=Homo sapiens OX=9606 GN=UBE2M PE=1 SV=1	T	NA	NA	C#DISFSDPDDLLNFK	NA	NA	1	NA	NA	0.321602	1
Q6NZY4	633	ZCCHC8	ZCCHC8_C633	ZCHC8_HUMAN Zinc finger CCHC domain-containing protein 8 OS=Homo sapiens OX=9606 GN=ZCCHC8 PE=1 SV=2	N	NA	NA	C#DISNGGSQK	NA	NA	1	NA	NA	0.0201835	1
Q9UMZ2	208	SYNRG	SYNRG_C208	SYNRG_HUMAN Synergin gamma OS=Homo sapiens OX=9606 GN=SYNRG PE=1 SV=2	S	NA	NA	C#DISTSGQEQIK	NA	NA	1	NA	NA	0.0103919	1
O43414	155	ERI3	ERI3_C155	ERI3_HUMAN ERI1 exoribonuclease 3 OS=Homo sapiens OX=9606 GN=ERI3 PE=1 SV=2	T	NA	NA	C#DKPQIHPQ	NA	NA	1	NA	NA	0.00956579	1
Q8N448	127	LNX2	LNX2_C127	LNX2_HUMAN Ligand of Numb protein X 2 OS=Homo sapiens OX=9606 GN=LNX2 PE=1 SV=1	R	NA	NA	C#DLEAHLK	NA	NA	1	NA	NA	0.225868	1
O75044	280	SRGAP2	SRGAP2_C280	SRGP2_HUMAN SLIT-ROBO Rho GTPase-activating protein 2 OS=Homo sapiens OX=9606 GN=SRGAP2 PE=1 SV=3	C	NA	NA	C#DLGYHASLNR	NA	NA	1	NA	NA	0.235419	1
Q8NB78	465	KDM1B	KDM1B_C465	KDM1B_HUMAN Lysine-specific histone demethylase 1B OS=Homo sapiens OX=9606 GN=KDM1B PE=1 SV=3	R	NA	NA	C#DLIQEGGR	NA	NA	1	NA	NA	0.033888	1
Q9Y5Q8	411	GTF3C5	GTF3C5_C411	TF3C5_HUMAN General transcription factor 3C polypeptide 5 OS=Homo sapiens OX=9606 GN=GTF3C5 PE=1 SV=2	L	NA	NA	C#DLNVEELQK	NA	NA	1	NA	NA	0.0362815	1
P21333	2160	FLNA	FLNA_C2160	FLNA_HUMAN Filamin-A OS=Homo sapiens OX=9606 GN=FLNA PE=1 SV=4	H	NA	NA	C#DLSLK	NA	NA	1	NA	NA	0.181226	1
Q9NWZ8	132	GEMIN8	GEMIN8_C132	GEMI8_HUMAN Gem-associated protein 8 OS=Homo sapiens OX=9606 GN=GEMIN8 PE=1 SV=1	E	NA	NA	C#DLSNMEITEELR	NA	NA	1	NA	NA	0.0112556	1
Q9UKX7	181	NUP50	NUP50_C181	NUP50_HUMAN Nuclear pore complex protein Nup50 OS=Homo sapiens OX=9606 GN=NUP50 PE=1 SV=2	L	NA	NA	C#DLTPIFK	NA	NA	1	NA	NA	0.321957	1
Q13823	257	GNL2	GNL2_C257	NOG2_HUMAN Nucleolar GTP-binding protein 2 OS=Homo sapiens OX=9606 GN=GNL2 PE=1 SV=1	K	NA	NA	C#DLVPTWATK	NA	NA	1	NA	NA	0.0144026	1
Q8IZ83	350	ALDH16A1	ALDH16A1_C350	A16A1_HUMAN Aldehyde dehydrogenase family 16 member A1 OS=Homo sapiens OX=9606 GN=ALDH16A1 PE=1 SV=2	A	NA	NA	C#DLVQR	NA	NA	1	NA	NA	0.194165	1
P30520	182	ADSS	ADSS_C182	PURA2_HUMAN Adenylosuccinate synthetase isozyme 2 OS=Homo sapiens OX=9606 GN=ADSS PE=1 SV=3	M	NA	NA	C#DLVSDFDGFSER	NA	NA	1	NA	NA	0.0190092	1
O60343	906	TBC1D4	TBC1D4_C906	TBCD4_HUMAN TBC1 domain family member 4 OS=Homo sapiens OX=9606 GN=TBC1D4 PE=1 SV=2	R	NA	NA	C#DMEDIHTLLK	NA	NA	1	NA	NA	0.070336	1
P51532	998	SMARCA4	SMARCA4_C998	SMCA4_HUMAN Transcription activator BRG1 OS=Homo sapiens OX=9606 GN=SMARCA4 PE=1 SV=2	K	NA	NA	C#DMSALQR	NA	NA	1	NA	NA	0.152679	1
P55060	272	CSE1L	CSE1L_C272	XPO2_HUMAN Exportin-2 OS=Homo sapiens OX=9606 GN=CSE1L PE=1 SV=3	I	NA	NA	C#DNAALYAQK	NA	NA	1	NA	NA	0.0148073	1
Q96T23	1311	RSF1	RSF1_C1311	RSF1_HUMAN Remodeling and spacing factor 1 OS=Homo sapiens OX=9606 GN=RSF1 PE=1 SV=2	S	NA	NA	C#DNAHGDANQPAR	NA	NA	1	NA	NA	0.179188	1
Q13615	621	MTMR3	MTMR3_C621	MTMR3_HUMAN Myotubularin-related protein 3 OS=Homo sapiens OX=9606 GN=MTMR3 PE=1 SV=3	A	NA	NA	C#DNTVPLASR	NA	NA	1	NA	NA	0.391497	1
Q15181	254	PPA1	PPA1_C254	IPYR_HUMAN Inorganic pyrophosphatase OS=Homo sapiens OX=9606 GN=PPA1 PE=1 SV=2	K	NA	NA	C#DPDAAR	NA	NA	1	NA	NA	0.105681	1
Q92547	1200	TOPBP1	TOPBP1_C1200	TOPB1_HUMAN DNA topoisomerase 2-binding protein 1 OS=Homo sapiens OX=9606 GN=TOPBP1 PE=1 SV=3	V	NA	NA	C#DPGNIR	NA	NA	1	NA	NA	0.379094	1
O60934	323	NBN	NBN_C323	NBN_HUMAN Nibrin OS=Homo sapiens OX=9606 GN=NBN PE=1 SV=1	Y	NA	NA	C#DPQGHPSTGLK	NA	NA	1	NA	NA	0.00325676	1
Q8NC42	371	RNF149	RNF149_C371	RN149_HUMAN E3 ubiquitin-protein ligase RNF149 OS=Homo sapiens OX=9606 GN=RNF149 PE=2 SV=2	Q	NA	NA	C#DPSFK	NA	NA	1	NA	NA	0.225975	1
Q9UPN9	461	TRIM33	TRIM33_C461	TRI33_HUMAN E3 ubiquitin-protein ligase TRIM33 OS=Homo sapiens OX=9606 GN=TRIM33 PE=1 SV=3	H	NA	NA	C#DPTFWAK	NA	NA	1	NA	NA	0.0972685	1
Q9BRX2	258	PELO	PELO_C258	PELO_HUMAN Protein pelota homolog OS=Homo sapiens OX=9606 GN=PELO PE=1 SV=2	L	NA	NA	C#DPTVASR	NA	NA	1	NA	NA	0.327734	1
P48147	255	PREP	PREP_C255	PPCE_HUMAN Prolyl endopeptidase OS=Homo sapiens OX=9606 GN=PREP PE=1 SV=2	G	NA	NA	C#DPVNR	NA	NA	1	NA	NA	0.274472	1
Q9UPN9	447	TRIM33	TRIM33_C447	TRI33_HUMAN E3 ubiquitin-protein ligase TRIM33 OS=Homo sapiens OX=9606 GN=TRIM33 PE=1 SV=3	R	NA	NA	C#DPVPAANGAIR	NA	NA	2	NA	NA	0.250042	1
Q9BS26	92	ERP44	ERP44_C92	ERP44_HUMAN Endoplasmic reticulum resident protein 44 OS=Homo sapiens OX=9606 GN=ERP44 PE=1 SV=1	D	NA	NA	C#DQHSDIAQR	NA	NA	2	NA	NA	0.0371982	1
Q9H1A3	215	METTL9	METTL9_C215	METL9_HUMAN Methyltransferase-like protein 9 OS=Homo sapiens OX=9606 GN=METTL9 PE=2 SV=1	R	NA	NA	C#DQPLTLLK	NA	NA	1	NA	NA	0.319344	1
P78527	3420	PRKDC	PRKDC_C3420	PRKDC_HUMAN DNA-dependent protein kinase catalytic subunit OS=Homo sapiens OX=9606 GN=PRKDC PE=1 SV=3	F	NA	NA	C#DQQLR	NA	NA	1	NA	NA	0.227516	1
O14545	389	TRAFD1	TRAFD1_C389	TRAD1_HUMAN TRAF-type zinc finger domain-containing protein 1 OS=Homo sapiens OX=9606 GN=TRAFD1 PE=1 SV=1	Q	NA	NA	C#DQRPATAT	NA	NA	1	NA	NA	0.0383082	1
Q9NS86	121	LANCL2	LANCL2_C121	LANC2_HUMAN LanC-like protein 2 OS=Homo sapiens OX=9606 GN=LANCL2 PE=1 SV=1	T	NA	NA	C#DQTYLLR	NA	NA	1	NA	NA	0.208986	1
Q8N6S5	48	ARL6IP6	ARL6IP6_C48	AR6P6_HUMAN ADP-ribosylation factor-like protein 6-interacting protein 6 OS=Homo sapiens OX=9606 GN=ARL6IP6 PE=1 SV=1	G	NA	NA	C#DQVAR	NA	NA	1	NA	NA	0.388074	1
Q9Y2U8	346	LEMD3	LEMD3_C346	MAN1_HUMAN Inner nuclear membrane protein Man1 OS=Homo sapiens OX=9606 GN=LEMD3 PE=1 SV=2	G	NA	NA	C#DQVDSSPVPR	NA	NA	1	NA	NA	0.0386631	1
Q8N999	294	C12orf29	C12orf29_C294	CL029_HUMAN Uncharacterized protein C12orf29 OS=Homo sapiens OX=9606 GN=C12orf29 PE=1 SV=2	K	NA	NA	C#DSAFDIK	NA	NA	1	NA	NA	0.190723	1
P20585	142	MSH3	MSH3_C142	MSH3_HUMAN DNA mismatch repair protein Msh3 OS=Homo sapiens OX=9606 GN=MSH3 PE=1 SV=4	C	NA	NA	C#DSALPQSR	NA	NA	1	NA	NA	0.00987485	1
Q16576	97	RBBP7	RBBP7_C97	RBBP7_HUMAN Histone-binding protein RBBP7 OS=Homo sapiens OX=9606 GN=RBBP7 PE=1 SV=1	H	NA	NA	C#DSDKGEFGGFGSVTGK C#DSDKGEFGGFGSVT	NA	NA	3	NA	NA	0.0331311	1
Q7Z2W4	581	ZC3HAV1	ZC3HAV1_C581	ZCCHV_HUMAN Zinc finger CCCH-type antiviral protein 1 OS=Homo sapiens OX=9606 GN=ZC3HAV1 PE=1 SV=3	S	NA	NA	C#DSFPIR	NA	NA	1	NA	NA	0.061023	1
P22413	807	ENPP1	ENPP1_C807	ENPP1_HUMAN Ectonucleotide pyrophosphatase/phosphodiesterase family member 1 OS=Homo sapiens OX=9606 GN=ENPP1 PE=1 SV=2	R	NA	NA	C#DSLENLR	NA	NA	1	NA	NA	0.02909	1
Q13043	80	STK4	STK4_C80	STK4_HUMAN Serine/threonine-protein kinase 4 OS=Homo sapiens OX=9606 GN=STK4 PE=1 SV=2	Q	NA	NA	C#DSPHVVK	NA	NA	1	NA	NA	0.194745	1
Q9Y6E0	89	STK24	STK24_C89	STK24_HUMAN Serine/threonine-protein kinase 24 OS=Homo sapiens OX=9606 GN=STK24 PE=1 SV=1	Q	NA	NA	C#DSPYVTK	NA	NA	1	NA	NA	0.0542436	1
Q8IYH5	442	ZZZ3	ZZZ3_C442	ZZZ3_HUMAN ZZ-type zinc finger-containing protein 3 OS=Homo sapiens OX=9606 GN=ZZZ3 PE=1 SV=1	C	NA	NA	C#DSQNNGSEGVSKPPSEAR	NA	NA	1	NA	NA	0.0594472	1
Q9P289	77	STK26	STK26_C77	STK26_HUMAN Serine/threonine-protein kinase 26 OS=Homo sapiens OX=9606 GN=STK26 PE=1 SV=2	Q	NA	NA	C#DSSYVTK	NA	NA	1	NA	NA	0.0554556	1
Q92540	537	SMG7	SMG7_C537	SMG7_HUMAN Protein SMG7 OS=Homo sapiens OX=9606 GN=SMG7 PE=1 SV=2	N	NA	NA	C#DTGEKPVVTFK	NA	NA	1	NA	NA	0.0735455	1
Q6GMV2	268	SMYD5	SMYD5_C268	SMYD5_HUMAN SET and MYND domain-containing protein 5 OS=Homo sapiens OX=9606 GN=SMYD5 PE=1 SV=2	A	NA	NA	C#DTLELKPQDR	NA	NA	1	NA	NA	0.287215	1
P42345	2243	MTOR	MTOR_C2243	MTOR_HUMAN Serine/threonine-protein kinase mTOR OS=Homo sapiens OX=9606 GN=MTOR PE=1 SV=1	H	NA	NA	C#DTLHAL	NA	NA	1	NA	NA	0.278399	1
Q13263	224	TRIM28	TRIM28_C224	TIF1B_HUMAN Transcription intermediary factor 1-beta OS=Homo sapiens OX=9606 GN=TRIM28 PE=1 SV=5	S	NA	NA	C#DTLTCR	NA	NA	1	NA	NA	0.284735	1
Q9NYA4	618	MTMR4	MTMR4_C618	MTMR4_HUMAN Myotubularin-related protein 4 OS=Homo sapiens OX=9606 GN=MTMR4 PE=1 SV=2	A	NA	NA	C#DTSSPLTR	NA	NA	1	NA	NA	0.17187	1
P49711	442	CTCF	CTCF_C442	CTCF_HUMAN Transcriptional repressor CTCF OS=Homo sapiens OX=9606 GN=CTCF PE=1 SV=1	H	NA	NA	C#DTVIAR	NA	NA	1	NA	NA	0.178478	1
Q5JPI3	30	C3orf38	C3orf38_C30	CC038_HUMAN Uncharacterized protein C3orf38 OS=Homo sapiens OX=9606 GN=C3orf38 PE=1 SV=1	L	NA	NA	C#DTVTNR	NA	NA	1	NA	NA	0.096407	1
P09234	9	SNRPC	SNRPC_C9	RU1C_HUMAN U1 small nuclear ribonucleoprotein C OS=Homo sapiens OX=9606 GN=SNRPC PE=1 SV=1	Y	NA	NA	C#DTYLTHDSPSVR	NA	NA	2	NA	NA	0.00106203	1
Q9NPA3	5	MID1IP1	MID1IP1_C5	M1IP1_HUMAN Mid1-interacting protein 1 OS=Homo sapiens OX=9606 GN=MID1IP1 PE=1 SV=1	I	NA	NA	C#DTYNQK	NA	NA	1	NA	NA	0.245709	1
P10316	125	HLA-A	HLA-A_C125	1A69_HUMAN HLA class I histocompatibility antigen, A-69 alpha chain OS=Homo sapiens OX=9606 GN=HLA-A PE=1 SV=2	G	NA	NA	C#DVGSDWR	NA	NA	1	NA	NA	0.382583	1
Q9P2R3	749	ANKFY1	ANKFY1_C749	ANFY1_HUMAN Rabankyrin-5 OS=Homo sapiens OX=9606 GN=ANKFY1 PE=1 SV=2	G	NA	NA	C#DVNSPR	NA	NA	1	NA	NA	0.0628466	1
P31939	325	ATIC	ATIC_C325	PUR9_HUMAN Bifunctional purine biosynthesis protein PURH OS=Homo sapiens OX=9606 GN=ATIC PE=1 SV=3	V	NA	NA	C#DVPTAK	NA	NA	1	NA	NA	0.163006	1
Q8N1F7	397	NUP93	NUP93_C397	NUP93_HUMAN Nuclear pore complex protein Nup93 OS=Homo sapiens OX=9606 GN=NUP93 PE=1 SV=2	R	NA	NA	C#DVTDNQSEVADKTEDYLWLK	NA	NA	1	NA	NA	0.00054408	1
P49589	204	CARS	CARS_C204	SYCC_HUMAN Cysteine--tRNA ligase, cytoplasmic OS=Homo sapiens OX=9606 GN=CARS PE=1 SV=3	G	NA	NA	C#DVTDNSIFSK	NA	NA	1	NA	NA	0.168084	1
Q9P0U4	531	CXXC1	CXXC1_C531	CXXC1_HUMAN CXXC-type zinc finger protein 1 OS=Homo sapiens OX=9606 GN=CXXC1 PE=1 SV=2	F	NA	NA	C#DVYNPQSK	NA	NA	1	NA	NA	0.110382	1
Q7L576	519	CYFIP1	CYFIP1_C519	CYFP1_HUMAN Cytoplasmic FMR1-interacting protein 1 OS=Homo sapiens OX=9606 GN=CYFIP1 PE=1 SV=1	V	NA	NA	C#DWETGHEPFNDPALR	NA	NA	1	NA	NA	0.193063	1
P52209	171	PGD	PGD_C171	6PGD_HUMAN 6-phosphogluconate dehydrogenase, decarboxylating OS=Homo sapiens OX=9606 GN=PGD PE=1 SV=3	C	NA	NA	C#DWVGDEGAGHFVK C#DWVGDEGAGHF	NA	NA	3	NA	NA	0.00138457	1
Q9P003	32	CNIH4	CNIH4_C32	CNIH4_HUMAN Protein cornichon homolog 4 OS=Homo sapiens OX=9606 GN=CNIH4 PE=1 SV=1	E	NA	NA	C#DYINAR	NA	NA	1	NA	NA	0.162965	1
P16333	266	NCK1	NCK1_C266	NCK1_HUMAN Cytoplasmic protein NCK1 OS=Homo sapiens OX=9606 GN=NCK1 PE=1 SV=1	Q	NA	NA	C#DYIRPSLTGK	NA	NA	2	NA	NA	0.166984	1
Q1KMD3	602	HNRNPUL2	HNRNPUL2_C602	HNRL2_HUMAN Heterogeneous nuclear ribonucleoprotein U-like protein 2 OS=Homo sapiens OX=9606 GN=HNRNPUL2 PE=1 SV=1	K	NA	NA	C#DYMDEVTYGELEKEEAQPIVTK	NA	NA	1	NA	NA	1.13e-05	1
Q14166	572	TTLL12	TTLL12_C572	TTL12_HUMAN Tubulin--tyrosine ligase-like protein 12 OS=Homo sapiens OX=9606 GN=TTLL12 PE=1 SV=2	L	NA	NA	C#DYPSSR	NA	NA	1	NA	NA	0.188411	1
P56270	371	MAZ	MAZ_C371	MAZ_HUMAN Myc-associated zinc finger protein OS=Homo sapiens OX=9606 GN=MAZ PE=1 SV=1	K	NA	NA	C#EAAFATK	NA	NA	1	NA	NA	0.118996	1
Q9UBU6	93	FAM8A1	FAM8A1_C93	FA8A1_HUMAN Protein FAM8A1 OS=Homo sapiens OX=9606 GN=FAM8A1 PE=1 SV=1	G	NA	NA	C#EAPEAAAPR	NA	NA	1	NA	NA	0.0174862	1
Q9BY67	313	CADM1	CADM1_C313	CADM1_HUMAN Cell adhesion molecule 1 OS=Homo sapiens OX=9606 GN=CADM1 PE=1 SV=2	R	NA	NA	C#EASNIVGK	NA	NA	1	NA	NA	0.0404503	1
Q14974	223	KPNB1	KPNB1_C223	IMB1_HUMAN Importin subunit beta-1 OS=Homo sapiens OX=9606 GN=KPNB1 PE=1 SV=2	V	NA	NA	C#EATQCPDTR	NA	NA	1	NA	NA	0.281973	1
P54136	638	RARS	RARS_C638	SYRC_HUMAN Arginine--tRNA ligase, cytoplasmic OS=Homo sapiens OX=9606 GN=RARS PE=1 SV=2	L	NA	NA	C#EAVAAVMAK	NA	NA	1	NA	NA	0.0320728	1
Q9NVM4	171	PRMT7	PRMT7_C171	ANM7_HUMAN Protein arginine N-methyltransferase 7 OS=Homo sapiens OX=9606 GN=PRMT7 PE=1 SV=1	N	NA	NA	C#EAVPHR	NA	NA	1	NA	NA	0.397559	1
P27694	289	RPA1	RPA1_C289	RFA1_HUMAN Replication protein A 70 kDa DNA-binding subunit OS=Homo sapiens OX=9606 GN=RPA1 PE=1 SV=2	P	NA	NA	C#EDDHHLPTVQ	NA	NA	1	NA	NA	0.00248214	1
Q8IVQ6	219	ZDHHC21	ZDHHC21_C219	ZDH21_HUMAN Palmitoyltransferase ZDHHC21 OS=Homo sapiens OX=9606 GN=ZDHHC21 PE=2 SV=1	C	NA	NA	C#EDISRPR	NA	NA	1	NA	NA	0.270993	1
P63010	95	AP2B1	AP2B1_C95	AP2B1_HUMAN AP-2 complex subunit beta OS=Homo sapiens OX=9606 GN=AP2B1 PE=1 SV=1	D	NA	NA	C#EDPNPLIR	NA	NA	1	NA	NA	0.164456	1
P61289	92	PSME3	PSME3_C92	PSME3_HUMAN Proteasome activator complex subunit 3 OS=Homo sapiens OX=9606 GN=PSME3 PE=1 SV=1	E	NA	NA	C#EEAFQGTK	NA	NA	1	NA	NA	0.0130803	1
O75970	810	MPDZ	MPDZ_C810	MPDZ_HUMAN Multiple PDZ domain protein OS=Homo sapiens OX=9606 GN=MPDZ PE=1 SV=2	S	NA	NA	C#EEAGLADKPLFR	NA	NA	1	NA	NA	0.106787	1
A0AVT1	433	UBA6	UBA6_C433	UBA6_HUMAN Ubiquitin-like modifier-activating enzyme 6 OS=Homo sapiens OX=9606 GN=UBA6 PE=1 SV=1	E	NA	NA	C#EEFLPR	NA	NA	1	NA	NA	0.0365489	1
Q9UIG0	1348	BAZ1B	BAZ1B_C1348	BAZ1B_HUMAN Tyrosine-protein kinase BAZ1B OS=Homo sapiens OX=9606 GN=BAZ1B PE=1 SV=2	K	NA	NA	C#EEILHK	NA	NA	1	NA	NA	0.295795	1
Q9P2E9	933	RRBP1	RRBP1_C933	RRBP1_HUMAN Ribosome-binding protein 1 OS=Homo sapiens OX=9606 GN=RRBP1 PE=1 SV=5	K	NA	NA	C#EELSGLHGQLQ C#EELSGLHGQ	NA	NA	3	NA	NA	0.0314942	1
O95219	342	SNX4	SNX4_C342	SNX4_HUMAN Sorting nexin-4 OS=Homo sapiens OX=9606 GN=SNX4 PE=1 SV=1	Q	NA	NA	C#EELVTGTVR	NA	NA	1	NA	NA	0.230363	1
Q9H0E9	446	BRD8	BRD8_C446	BRD8_HUMAN Bromodomain-containing protein 8 OS=Homo sapiens OX=9606 GN=BRD8 PE=1 SV=2	F	NA	NA	C#EENDDPQSLPGPWEHPIQQER	NA	NA	1	NA	NA	0.000605645	1
Q00610	870	CLTC	CLTC_C870	CLH1_HUMAN Clathrin heavy chain 1 OS=Homo sapiens OX=9606 GN=CLTC PE=1 SV=5	G	NA	NA	C#EEPATHNALAK C#EEPATHNAL	NA	NA	3	NA	NA	0.00198823	1
Q6P2E9	249	EDC4	EDC4_C249	EDC4_HUMAN Enhancer of mRNA-decapping protein 4 OS=Homo sapiens OX=9606 GN=EDC4 PE=1 SV=1	C	NA	NA	C#EESSPTVALLHEDR	NA	NA	1	NA	NA	0.0031786	1
O43542	221	XRCC3	XRCC3_C221	XRCC3_HUMAN DNA repair protein XRCC3 OS=Homo sapiens OX=9606 GN=XRCC3 PE=1 SV=1	R	NA	NA	C#EFDSQASAPR	NA	NA	1	NA	NA	0.0361709	1
P55265	519	ADAR	ADAR_C519	DSRAD_HUMAN Double-stranded RNA-specific adenosine deaminase OS=Homo sapiens OX=9606 GN=ADAR PE=1 SV=4	T	NA	NA	C#EFNMIEQSGPPHEPR	NA	NA	1	NA	NA	0.0112141	1
P10809	237	HSPD1	HSPD1_C237	CH60_HUMAN 60 kDa heat shock protein, mitochondrial OS=Homo sapiens OX=9606 GN=HSPD1 PE=1 SV=2	K	NA	NA	C#EFQDAYVLLSEK	NA	NA	1	NA	NA	0.00083272	1
Q96T17	278	MAP7D2	MAP7D2_C278	MA7D2_HUMAN MAP7 domain-containing protein 2 OS=Homo sapiens OX=9606 GN=MAP7D2 PE=1 SV=2	R	NA	NA	C#EFSGGIPK	NA	NA	1	NA	NA	0.0961556	1
Q96FC9	98	DDX11	DDX11_C98	DDX11_HUMAN ATP-dependent DNA helicase DDX11 OS=Homo sapiens OX=9606 GN=DDX11 PE=1 SV=1	S	NA	NA	C#EGAAGTPR	NA	NA	1	NA	NA	0.00793331	1
P52789	628	HK2	HK2_C628	HXK2_HUMAN Hexokinase-2 OS=Homo sapiens OX=9606 GN=HK2 PE=1 SV=2	G	NA	NA	C#EGEDVVTLLK	NA	NA	1	NA	NA	0.130084	1
Q9Y6H1	134	CHCHD2	CHCHD2_C134	CHCH2_HUMAN Coiled-coil-helix-coiled-coil-helix domain-containing protein 2 OS=Homo sapiens OX=9606 GN=CHCHD2 PE=1 SV=1	L	NA	NA	C#EGFNEVLK	NA	NA	1	NA	NA	0.133588	1
O95104	616	SCAF4	SCAF4_C616	SCAF4_HUMAN SR-related and CTD-associated factor 4 OS=Homo sapiens OX=9606 GN=SCAF4 PE=1 SV=3	F	NA	NA	C#EGGMLDSDTLNPDWK	NA	NA	2	NA	NA	0.0191397	1
P82932	105	MRPS6	MRPS6_C105	RT06_HUMAN 28S ribosomal protein S6, mitochondrial OS=Homo sapiens OX=9606 GN=MRPS6 PE=1 SV=3	E	NA	NA	C#EGIVPVPLAEK	NA	NA	1	NA	NA	0.000482315	1
Q15311	227	RALBP1	RALBP1_C227	RBP1_HUMAN RalA-binding protein 1 OS=Homo sapiens OX=9606 GN=RALBP1 PE=1 SV=3	K	NA	NA	C#EGIYR	NA	NA	1	NA	NA	0.354657	1
P18858	719	LIG1	LIG1_C719	DNLI1_HUMAN DNA ligase 1 OS=Homo sapiens OX=9606 GN=LIG1 PE=1 SV=1	S	NA	NA	C#EGLMVK	NA	NA	1	NA	NA	0.184548	1
Q9H0D6	276	XRN2	XRN2_C276	XRN2_HUMAN 5'-3' exoribonuclease 2 OS=Homo sapiens OX=9606 GN=XRN2 PE=1 SV=1	D	NA	NA	C#EGLPR	NA	NA	1	NA	NA	0.346553	1
Q96EY7	642	PTCD3	PTCD3_C642	PTCD3_HUMAN Pentatricopeptide repeat domain-containing protein 3, mitochondrial OS=Homo sapiens OX=9606 GN=PTCD3 PE=1 SV=3	I	NA	NA	C#EGLTQR	NA	NA	1	NA	NA	0.104434	1
Q15369	11	ELOC	ELOC_C11	ELOC_HUMAN Elongin-C OS=Homo sapiens OX=9606 GN=ELOC PE=1 SV=1	G	NA	NA	C#EGPDAMYVK	NA	NA	1	NA	NA	0.000830012	1
P19838	61	NFKB1	NFKB1_C61	NFKB1_HUMAN Nuclear factor NF-kappa-B p105 subunit OS=Homo sapiens OX=9606 GN=NFKB1 PE=1 SV=2	V	NA	NA	C#EGPSHGGLPGAS	NA	NA	1	NA	NA	0.0124404	1
Q9NQW6	309	ANLN	ANLN_C309	ANLN_HUMAN Anillin OS=Homo sapiens OX=9606 GN=ANLN PE=1 SV=2	S	NA	NA	C#EGQNPELLPK	NA	NA	1	NA	NA	0.0142	1
P15735	294	PHKG2	PHKG2_C294	PHKG2_HUMAN Phosphorylase b kinase gamma catalytic chain, liver/testis isoform OS=Homo sapiens OX=9606 GN=PHKG2 PE=1 SV=1	R	NA	NA	C#EGSQPWNLTPR	NA	NA	1	NA	NA	0.0217345	1
O94762	791	RECQL5	RECQL5_C791	RECQ5_HUMAN ATP-dependent DNA helicase Q5 OS=Homo sapiens OX=9606 GN=RECQL5 PE=1 SV=2	S	NA	NA	C#EGVQGPPMAPEK	NA	NA	1	NA	NA	0.015499	1
O15371	375	EIF3D	EIF3D_C375	EIF3D_HUMAN Eukaryotic translation initiation factor 3 subunit D OS=Homo sapiens OX=9606 GN=EIF3D PE=1 SV=1	R	NA	NA	C#EHDGVMTGANGEVSFINIK	NA	NA	1	NA	NA	0.00150001	1
O94906	837	PRPF6	PRPF6_C837	PRP6_HUMAN Pre-mRNA-processing factor 6 OS=Homo sapiens OX=9606 GN=PRPF6 PE=1 SV=1	K	NA	NA	C#EHDPHVLLAVAK	NA	NA	2	NA	NA	0.0088439	1
Q9BSJ2	848	TUBGCP2	TUBGCP2_C848	GCP2_HUMAN Gamma-tubulin complex component 2 OS=Homo sapiens OX=9606 GN=TUBGCP2 PE=1 SV=2	D	NA	NA	C#EHGMASVISR	NA	NA	1	NA	NA	0.324925	1
Q9NQT5	257	EXOSC3	EXOSC3_C257	EXOS3_HUMAN Exosome complex component RRP40 OS=Homo sapiens OX=9606 GN=EXOSC3 PE=1 SV=3	A	NA	NA	C#EHMTSDQR	NA	NA	1	NA	NA	0.150653	1
P42345	1999	MTOR	MTOR_C1999	MTOR_HUMAN Serine/threonine-protein kinase mTOR OS=Homo sapiens OX=9606 GN=MTOR PE=1 SV=1	M	NA	NA	C#EHSNTLVQQ	NA	NA	1	NA	NA	0.0219027	1
P38117	42	ETFB	ETFB_C42	ETFB_HUMAN Electron transfer flavoprotein subunit beta OS=Homo sapiens OX=9606 GN=ETFB PE=1 SV=3	F	NA	NA	C#EIAVEEAVR	NA	NA	1	NA	NA	0.336049	1
Q15003	239	NCAPH	NCAPH_C239	CND2_HUMAN Condensin complex subunit 2 OS=Homo sapiens OX=9606 GN=NCAPH PE=1 SV=3	K	NA	NA	C#EIDPMFQK	NA	NA	3	NA	NA	0.00727594	1
Q9NYL2	285	MAP3K20	MAP3K20_C285	M3K20_HUMAN Mitogen-activated protein kinase kinase kinase 20 OS=Homo sapiens OX=9606 GN=MAP3K20 PE=1 SV=3	R	NA	NA	C#EIEATLER	NA	NA	1	NA	NA	0.0178241	1
O94782	619	USP1	USP1_C619	UBP1_HUMAN Ubiquitin carboxyl-terminal hydrolase 1 OS=Homo sapiens OX=9606 GN=USP1 PE=1 SV=1	M	NA	NA	C#EIGKPEPLNEEEAR	NA	NA	2	NA	NA	0.0245181	1
Q15813	371	TBCE	TBCE_C371	TBCE_HUMAN Tubulin-specific chaperone E OS=Homo sapiens OX=9606 GN=TBCE PE=1 SV=1	K	NA	NA	C#EILPEER	NA	NA	1	NA	NA	0.0394425	1
Q15154	582	PCM1	PCM1_C582	PCM1_HUMAN Pericentriolar material 1 protein OS=Homo sapiens OX=9606 GN=PCM1 PE=1 SV=5	N	NA	NA	C#EINNR	NA	NA	1	NA	NA	0.336436	1
Q9NWT1	288	PAK1IP1	PAK1IP1_C288	PK1IP_HUMAN p21-activated protein kinase-interacting protein 1 OS=Homo sapiens OX=9606 GN=PAK1IP1 PE=1 SV=2	L	NA	NA	C#EINTNAR	NA	NA	1	NA	NA	0.0297118	1
Q9NWL6	378	ASNSD1	ASNSD1_C378	ASND1_HUMAN Asparagine synthetase domain-containing protein 1 OS=Homo sapiens OX=9606 GN=ASNSD1 PE=2 SV=2	K	NA	NA	C#EIPSEEFSK	NA	NA	1	NA	NA	0.0826784	1
Q9Y3P9	250	RABGAP1	RABGAP1_C250	RBGP1_HUMAN Rab GTPase-activating protein 1 OS=Homo sapiens OX=9606 GN=RABGAP1 PE=1 SV=3	R	NA	NA	C#EIQEAVSR	NA	NA	1	NA	NA	0.321236	1
Q9BPY3	319	FAM118B	FAM118B_C319	F118B_HUMAN Protein FAM118B OS=Homo sapiens OX=9606 GN=FAM118B PE=1 SV=1	T	NA	NA	C#EISTR	NA	NA	1	NA	NA	0.38287	1
Q92538	613	GBF1	GBF1_C613	GBF1_HUMAN Golgi-specific brefeldin A-resistance guanine nucleotide exchange factor 1 OS=Homo sapiens OX=9606 GN=GBF1 PE=1 SV=2	S	NA	NA	C#EIVDGTR	NA	NA	1	NA	NA	0.0407115	1
Q9Y5L0	511	TNPO3	TNPO3_C511	TNPO3_HUMAN Transportin-3 OS=Homo sapiens OX=9606 GN=TNPO3 PE=1 SV=3	L	NA	NA	C#EKPLASAAAK	NA	NA	1	NA	NA	0.010844	1
Q96SW2	310	CRBN	CRBN_C310	CRBN_HUMAN Protein cereblon OS=Homo sapiens OX=9606 GN=CRBN PE=1 SV=1	R	NA	NA	C#ELDIMNK	NA	NA	2	NA	NA	0.0433904	1
Q9Y296	195	TRAPPC4	TRAPPC4_C195	TPPC4_HUMAN Trafficking protein particle complex subunit 4 OS=Homo sapiens OX=9606 GN=TRAPPC4 PE=1 SV=1	R	NA	NA	C#ELFDQNLK	NA	NA	2	NA	NA	0.0084818	1
P55010	59	EIF5	EIF5_C59	IF5_HUMAN Eukaryotic translation initiation factor 5 OS=Homo sapiens OX=9606 GN=EIF5 PE=1 SV=2	G	NA	NA	C#ELGAQTQFDVK	NA	NA	1	NA	NA	0.0246654	1
Q15057	468	ACAP2	ACAP2_C468	ACAP2_HUMAN Arf-GAP with coiled-coil, ANK repeat and PH domain-containing protein 2 OS=Homo sapiens OX=9606 GN=ACAP2 PE=1 SV=3	M	NA	NA	C#ELGNDVINR	NA	NA	1	NA	NA	0.015579	1
P37802	63	TAGLN2	TAGLN2_C63	TAGL2_HUMAN Transgelin-2 OS=Homo sapiens OX=9606 GN=TAGLN2 PE=1 SV=3	L	NA	NA	C#ELINALYPEGQAPVK	NA	NA	2	NA	NA	0.0970409	1
O75794	170	CDC123	CDC123_C170	CD123_HUMAN Cell division cycle protein 123 homolog OS=Homo sapiens OX=9606 GN=CDC123 PE=1 SV=1	W	NA	NA	C#ELIPGAEFR	NA	NA	1	NA	NA	0.071479	1
Q9UM54	1236	MYO6	MYO6_C1236	MYO6_HUMAN Unconventional myosin-VI OS=Homo sapiens OX=9606 GN=MYO6 PE=1 SV=4	M	NA	NA	C#ELNLEETGLTR	NA	NA	1	NA	NA	0.0899079	1
Q9Y3D2	45	MSRB2	MSRB2_C45	MSRB2_HUMAN Methionine-R-sulfoxide reductase B2, mitochondrial OS=Homo sapiens OX=9606 GN=MSRB2 PE=1 SV=2	T	NA	NA	C#ELPLAK	NA	NA	1	NA	NA	0.0598055	1
Q8IXW5	288	RPAP2	RPAP2_C288	RPAP2_HUMAN Putative RNA polymerase II subunit B1 CTD phosphatase RPAP2 OS=Homo sapiens OX=9606 GN=RPAP2 PE=1 SV=1	T	NA	NA	C#ELPLQK	NA	NA	1	NA	NA	0.0958067	1
Q9BXP5	490	SRRT	SRRT_C490	SRRT_HUMAN Serrate RNA effector molecule homolog OS=Homo sapiens OX=9606 GN=SRRT PE=1 SV=1	E	NA	NA	C#ELSPGVNR	NA	NA	1	NA	NA	0.0102187	1
O43432	301	EIF4G3	EIF4G3_C301	IF4G3_HUMAN Eukaryotic translation initiation factor 4 gamma 3 OS=Homo sapiens OX=9606 GN=EIF4G3 PE=1 SV=2	R	NA	NA	C#ELSSPR	NA	NA	1	NA	NA	0.282055	1
Q96KG9	241	SCYL1	SCYL1_C241	SCYL1_HUMAN N-terminal kinase-like protein OS=Homo sapiens OX=9606 GN=SCYL1 PE=1 SV=1	Y	NA	NA	C#ELVGANPK	NA	NA	1	NA	NA	0.00849488	1
Q12905	37	ILF2	ILF2_C37	ILF2_HUMAN Interleukin enhancer-binding factor 2 OS=Homo sapiens OX=9606 GN=ILF2 PE=1 SV=2	L	NA	NA	C#EMAFPR	NA	NA	2	NA	NA	0.15543	1
P60604	75	UBE2G2	UBE2G2_C75	UB2G2_HUMAN Ubiquitin-conjugating enzyme E2 G2 OS=Homo sapiens OX=9606 GN=UBE2G2 PE=1 SV=1	T	NA	NA	C#EMFHPN	NA	NA	1	NA	NA	0.194492	1
Q9NPD3	97	EXOSC4	EXOSC4_C97	EXOS4_HUMAN Exosome complex component RRP41 OS=Homo sapiens OX=9606 GN=EXOSC4 PE=1 SV=3	S	NA	NA	C#EMGLQLR	NA	NA	1	NA	NA	0.143897	1
Q32MZ4	750	LRRFIP1	LRRFIP1_C750	LRRF1_HUMAN Leucine-rich repeat flightless-interacting protein 1 OS=Homo sapiens OX=9606 GN=LRRFIP1 PE=1 SV=2	R	NA	NA	C#EMSEHPSQTVR	NA	NA	1	NA	NA	0.323717	1
Q92945	296	KHSRP	KHSRP_C296	FUBP2_HUMAN Far upstream element-binding protein 2 OS=Homo sapiens OX=9606 GN=KHSRP PE=1 SV=4	A	NA	NA	C#EMVMDILR	NA	NA	2	NA	NA	0.14444	1
Q9BSJ5	332	C17orf80	C17orf80_C332	CQ080_HUMAN Uncharacterized protein C17orf80 OS=Homo sapiens OX=9606 GN=C17orf80 PE=2 SV=2	G	NA	NA	C#ENFNTR	NA	NA	1	NA	NA	0.11293	1
Q8IX90	126	SKA3	SKA3_C126	SKA3_HUMAN Spindle and kinetochore-associated protein 3 OS=Homo sapiens OX=9606 GN=SKA3 PE=1 SV=2	N	NA	NA	C#ENFQK	NA	NA	1	NA	NA	0.310698	1
P62826	112	RAN	RAN_C112	RAN_HUMAN GTP-binding nuclear protein Ran OS=Homo sapiens OX=9606 GN=RAN PE=1 SV=3	V	NA	NA	C#ENIPIVLCGNK	NA	NA	1	NA	NA	0.0130996	1
P52732	740	KIF11	KIF11_C740	KIF11_HUMAN Kinesin-like protein KIF11 OS=Homo sapiens OX=9606 GN=KIF11 PE=1 SV=2	K	NA	NA	C#ENIQKPLSSVQ	NA	NA	1	NA	NA	0.144612	1
P42858	1961	HTT	HTT_C1961	HD_HUMAN Huntingtin OS=Homo sapiens OX=9606 GN=HTT PE=1 SV=2	R	NA	NA	C#ENLSTPTMLK	NA	NA	1	NA	NA	0.00263811	1
Q969T7	210	NT5C3B	NT5C3B_C210	5NT3B_HUMAN 7-methylguanosine phosphate-specific 5'-nucleotidase OS=Homo sapiens OX=9606 GN=NT5C3B PE=1 SV=4	A	NA	NA	C#ENSGYFQQLEGK	NA	NA	1	NA	NA	0.000359578	1
Q96GA7	38	SDSL	SDSL_C38	SDSL_HUMAN Serine dehydratase-like OS=Homo sapiens OX=9606 GN=SDSL PE=1 SV=1	K	NA	NA	C#ENVQPSGSFK	NA	NA	1	NA	NA	0.0316995	1
Q9UBB6	22	NCDN	NCDN_C22	NCDN_HUMAN Neurochondrin OS=Homo sapiens OX=9606 GN=NCDN PE=1 SV=1	D	NA	NA	C#EPALNQAEGR	NA	NA	1	NA	NA	0.020598	1
Q9Y4G8	1000	RAPGEF2	RAPGEF2_C1000	RPGF2_HUMAN Rap guanine nucleotide exchange factor 2 OS=Homo sapiens OX=9606 GN=RAPGEF2 PE=1 SV=1	Q	NA	NA	C#EPATNTLPK	NA	NA	1	NA	NA	0.0927425	1
O75044	728	SRGAP2	SRGAP2_C728	SRGP2_HUMAN SLIT-ROBO Rho GTPase-activating protein 2 OS=Homo sapiens OX=9606 GN=SRGAP2 PE=1 SV=3	E	NA	NA	C#EPIEAIAK	NA	NA	1	NA	NA	0.0554975	1
Q9UIA9	606	XPO7	XPO7_C606	XPO7_HUMAN Exportin-7 OS=Homo sapiens OX=9606 GN=XPO7 PE=1 SV=3	R	NA	NA	C#EPITSK	NA	NA	1	NA	NA	0.0398943	1
Q12888	772	TP53BP1	TP53BP1_C772	TP53B_HUMAN TP53-binding protein 1 OS=Homo sapiens OX=9606 GN=TP53BP1 PE=1 SV=2	S	NA	NA	C#EPLEGVEK	NA	NA	1	NA	NA	0.0200768	1
O15027	107	SEC16A	SEC16A_C107	SC16A_HUMAN Protein transport protein Sec16A OS=Homo sapiens OX=9606 GN=SEC16A PE=1 SV=4	P	NA	NA	C#EPLPGPLTQPR	NA	NA	1	NA	NA	0.296233	1
Q8ND56	78	LSM14A	LSM14A_C78	LS14A_HUMAN Protein LSM14 homolog A OS=Homo sapiens OX=9606 GN=LSM14A PE=1 SV=3	V	NA	NA	C#EPPKPQ	NA	NA	1	NA	NA	0.229172	1
P08574	219	CYC1	CYC1_C219	CY1_HUMAN Cytochrome c1, heme protein, mitochondrial OS=Homo sapiens OX=9606 GN=CYC1 PE=1 SV=3	Y	NA	NA	C#EPPTGVSLR	NA	NA	2	NA	NA	0.0988196	1
Q9NRL2	232	BAZ1A	BAZ1A_C232	BAZ1A_HUMAN Bromodomain adjacent to zinc finger domain protein 1A OS=Homo sapiens OX=9606 GN=BAZ1A PE=1 SV=2	H	NA	NA	C#EPQDGVIK	NA	NA	1	NA	NA	0.0060843	1
Q8N0X7	405	SPART	SPART_C405	SPART_HUMAN Spartin OS=Homo sapiens OX=9606 GN=SPART PE=1 SV=1	P	NA	NA	C#EPVPEEKPK	NA	NA	2	NA	NA	0.0633911	1
Q96ME7	61	ZNF512	ZNF512_C61	ZN512_HUMAN Zinc finger protein 512 OS=Homo sapiens OX=9606 GN=ZNF512 PE=1 SV=2	S	NA	NA	C#EPVSDFPASFR	NA	NA	1	NA	NA	0.0298702	1
Q86VU5	88	COMTD1	COMTD1_C88	CMTD1_HUMAN Catechol O-methyltransferase domain-containing protein 1 OS=Homo sapiens OX=9606 GN=COMTD1 PE=1 SV=1	T	NA	NA	C#EQAQLLANLAR	NA	NA	1	NA	NA	0.00257546	1
Q8NFC6	2599	BOD1L1	BOD1L1_C2599	BD1L1_HUMAN Biorientation of chromosomes in cell division protein 1-like 1 OS=Homo sapiens OX=9606 GN=BOD1L1 PE=1 SV=2	K	NA	NA	C#EQDLTIK	NA	NA	2	NA	NA	0.166633	1
Q96JB2	697	COG3	COG3_C697	COG3_HUMAN Conserved oligomeric Golgi complex subunit 3 OS=Homo sapiens OX=9606 GN=COG3 PE=1 SV=3	A	NA	NA	C#EQFIQQQTK	NA	NA	1	NA	NA	0.0430125	1
Q15393	1179	SF3B3	SF3B3_C1179	SF3B3_HUMAN Splicing factor 3B subunit 3 OS=Homo sapiens OX=9606 GN=SF3B3 PE=1 SV=4	L	NA	NA	C#EQFNSMEPNK	NA	NA	1	NA	NA	0.00758416	1
Q00577	292	PURA	PURA_C292	PURA_HUMAN Transcriptional activator protein Pur-alpha OS=Homo sapiens OX=9606 GN=PURA PE=1 SV=2	A	NA	NA	C#EQLHQQ	NA	NA	1	NA	NA	0.0824368	1
O95239	977	KIF4A	KIF4A_C977	KIF4A_HUMAN Chromosome-associated kinesin KIF4A OS=Homo sapiens OX=9606 GN=KIF4A PE=1 SV=3	V	NA	NA	C#EQNQQLLR	NA	NA	1	NA	NA	0.0082517	1
Q02040	563	AKAP17A	AKAP17A_C563	AK17A_HUMAN A-kinase anchor protein 17A OS=Homo sapiens OX=9606 GN=AKAP17A PE=1 SV=2	A	NA	NA	C#EQNVSR	NA	NA	1	NA	NA	0.079218	1
Q13643	132	FHL3	FHL3_C132	FHL3_HUMAN Four and a half LIM domains protein 3 OS=Homo sapiens OX=9606 GN=FHL3 PE=1 SV=4	G	NA	NA	C#EQPLGSR	NA	NA	1	NA	NA	0.0452849	1
P23508	58	MCC	MCC_C58	CRCM_HUMAN Colorectal mutant cancer protein OS=Homo sapiens OX=9606 GN=MCC PE=1 SV=2	Q	NA	NA	C#EQSHLMR	NA	NA	1	NA	NA	0.017765	1
Q92551	248	IP6K1	IP6K1_C248	IP6K1_HUMAN Inositol hexakisphosphate kinase 1 OS=Homo sapiens OX=9606 GN=IP6K1 PE=1 SV=3	K	NA	NA	C#EQSTSATLGVR	NA	NA	1	NA	NA	0.115353	1
Q15906	163	VPS72	VPS72_C163	VPS72_HUMAN Vacuolar protein sorting-associated protein 72 homolog OS=Homo sapiens OX=9606 GN=VPS72 PE=1 SV=1	H	NA	NA	C#ERPLTQ	NA	NA	1	NA	NA	0.0911768	1
Q15181	270	PPA1	PPA1_C270	IPYR_HUMAN Inorganic pyrophosphatase OS=Homo sapiens OX=9606 GN=PPA1 PE=1 SV=2	P	NA	NA	C#ESACTVPTDVDK	NA	NA	1	NA	NA	0.255281	1
Q53T59	287	HS1BP3	HS1BP3_C287	H1BP3_HUMAN HCLS1-binding protein 3 OS=Homo sapiens OX=9606 GN=HS1BP3 PE=1 SV=1	A	NA	NA	C#ESGGPTPSLSHR	NA	NA	2	NA	NA	0.0139838	1
Q12905	291	ILF2	ILF2_C291	ILF2_HUMAN Interleukin enhancer-binding factor 2 OS=Homo sapiens OX=9606 GN=ILF2 PE=1 SV=2	P	NA	NA	C#ESGNFR	NA	NA	1	NA	NA	0.222679	1
Q27J81	745	INF2	INF2_C745	INF2_HUMAN Inverted formin-2 OS=Homo sapiens OX=9606 GN=INF2 PE=1 SV=2	A	NA	NA	C#ESLLTSR	NA	NA	1	NA	NA	0.121374	1
P52732	819	KIF11	KIF11_C819	KIF11_HUMAN Kinesin-like protein KIF11 OS=Homo sapiens OX=9606 GN=KIF11 PE=1 SV=2	R	NA	NA	C#ESLNTR	NA	NA	1	NA	NA	0.127147	1
Q8NI27	1518	THOC2	THOC2_C1518	THOC2_HUMAN THO complex subunit 2 OS=Homo sapiens OX=9606 GN=THOC2 PE=1 SV=2	P	NA	NA	C#ESPYPNEK	NA	NA	1	NA	NA	0.0318075	1
O75691	313	UTP20	UTP20_C313	UTP20_HUMAN Small subunit processome component 20 homolog OS=Homo sapiens OX=9606 GN=UTP20 PE=1 SV=3	C	NA	NA	C#ESSEQIKR	NA	NA	2	NA	NA	0.0595357	1
Q13263	174	TRIM28	TRIM28_C174	TIF1B_HUMAN Transcription intermediary factor 1-beta OS=Homo sapiens OX=9606 GN=TRIM28 PE=1 SV=5	L	NA	NA	C#ETCVEAHQR	NA	NA	1	NA	NA	0.0440542	1
Q9BUM1	104	G6PC3	G6PC3_C104	G6PC3_HUMAN Glucose-6-phosphatase 3 OS=Homo sapiens OX=9606 GN=G6PC3 PE=1 SV=2	S	NA	NA	C#ETGPGSPSGH	NA	NA	1	NA	NA	0.00286622	1
P51610	1357	HCFC1	HCFC1_C1357	HCFC1_HUMAN Host cell factor 1 OS=Homo sapiens OX=9606 GN=HCFC1 PE=1 SV=2	P	NA	NA	C#ETHQTTSTGTTM	NA	NA	1	NA	NA	0.0425139	1
O94822	1347	LTN1	LTN1_C1347	LTN1_HUMAN E3 ubiquitin-protein ligase listerin OS=Homo sapiens OX=9606 GN=LTN1 PE=1 SV=6	M	NA	NA	C#ETLTYISK	NA	NA	1	NA	NA	0.195004	1
P61081	95	UBE2M	UBE2M_C95	UBC12_HUMAN NEDD8-conjugating enzyme Ubc12 OS=Homo sapiens OX=9606 GN=UBE2M PE=1 SV=1	K	NA	NA	C#ETMVYHPN	NA	NA	2	NA	NA	0.0353259	1
P62318	20	SNRPD3	SNRPD3_C20	SMD3_HUMAN Small nuclear ribonucleoprotein Sm D3 OS=Homo sapiens OX=9606 GN=SNRPD3 PE=1 SV=1	T	NA	NA	C#ETNTGEVYR	NA	NA	1	NA	NA	0.226937	1
Q99956	138	DUSP9	DUSP9_C138	DUS9_HUMAN Dual specificity protein phosphatase 9 OS=Homo sapiens OX=9606 GN=DUSP9 PE=1 SV=1	L	NA	NA	C#ETSLAGR	NA	NA	1	NA	NA	0.0369927	1
Q8N335	164	GPD1L	GPD1L_C164	GPD1L_HUMAN Glycerol-3-phosphate dehydrogenase 1-like protein OS=Homo sapiens OX=9606 GN=GPD1L PE=1 SV=1	F	NA	NA	C#ETTIGSK	NA	NA	1	NA	NA	0.0405428	1
Q92558	407	WASF1	WASF1_C407	WASF1_HUMAN Wiskott-Aldrich syndrome protein family member 1 OS=Homo sapiens OX=9606 GN=WASF1 PE=1 SV=1	V	NA	NA	C#ETVPVHPLPQGEVQ	NA	NA	1	NA	NA	0.00476875	1
Q9BU89	273	DOHH	DOHH_C273	DOHH_HUMAN Deoxyhypusine hydroxylase OS=Homo sapiens OX=9606 GN=DOHH PE=1 SV=1	S	NA	NA	C#EVALDMYEHETGR	NA	NA	1	NA	NA	0.272071	1
Q8TDP1	34	RNASEH2C	RNASEH2C_C34	RNH2C_HUMAN Ribonuclease H2 subunit C OS=Homo sapiens OX=9606 GN=RNASEH2C PE=1 SV=1	P	NA	NA	C#EVAVDGPAPVGR	NA	NA	1	NA	NA	0.0978513	1
P08670	328	VIM	VIM_C328	VIME_HUMAN Vimentin OS=Homo sapiens OX=9606 GN=VIM PE=1 SV=4	T	NA	NA	C#EVDALK	NA	NA	1	NA	NA	0.0182999	1
P34932	417	HSPA4	HSPA4_C417	HSP74_HUMAN Heat shock 70 kDa protein 4 OS=Homo sapiens OX=9606 GN=HSPA4 PE=1 SV=4	D	NA	NA	C#EVFSK	NA	NA	1	NA	NA	0.237494	1
P35659	161	DEK	DEK_C161	DEK_HUMAN Protein DEK OS=Homo sapiens OX=9606 GN=DEK PE=1 SV=1	I	NA	NA	C#EVLDLER	NA	NA	1	NA	NA	0.27368	1
Q7Z2W4	38	ZC3HAV1	ZC3HAV1_C38	ZCCHV_HUMAN Zinc finger CCCH-type antiviral protein 1 OS=Homo sapiens OX=9606 GN=ZC3HAV1 PE=1 SV=3	L	NA	NA	C#EVLQVAGPDR	NA	NA	1	NA	NA	0.0251828	1
O95299	253	NDUFA10	NDUFA10_C253	NDUAA_HUMAN NADH dehydrogenase [ubiquinone] 1 alpha subcomplex subunit 10, mitochondrial OS=Homo sapiens OX=9606 GN=NDUFA10 PE=1 SV=1	K	NA	NA	C#EVLQYSAR	NA	NA	1	NA	NA	0.0101387	1
Q9H074	72	PAIP1	PAIP1_C72	PAIP1_HUMAN Polyadenylate-binding protein-interacting protein 1 OS=Homo sapiens OX=9606 GN=PAIP1 PE=1 SV=1	Q	NA	NA	C#EVPASPQR	NA	NA	1	NA	NA	0.0224957	1
Q9H8H0	333	NOL11	NOL11_C333	NOL11_HUMAN Nucleolar protein 11 OS=Homo sapiens OX=9606 GN=NOL11 PE=1 SV=1	K	NA	NA	C#EVSSLAGALGK	NA	NA	1	NA	NA	0.000698205	1
A3KMH1	724	VWA8	VWA8_C724	VWA8_HUMAN von Willebrand factor A domain-containing protein 8 OS=Homo sapiens OX=9606 GN=VWA8 PE=1 SV=2	K	NA	NA	C#EVTSGTLR	NA	NA	1	NA	NA	0.156409	1
P23396	134	RPS3	RPS3_C134	RS3_HUMAN 40S ribosomal protein S3 OS=Homo sapiens OX=9606 GN=RPS3 PE=1 SV=2	G	NA	NA	C#EVVVSGK	NA	NA	1	NA	NA	0.0299875	1
Q15047	385	SETDB1	SETDB1_C385	SETB1_HUMAN Histone-lysine N-methyltransferase SETDB1 OS=Homo sapiens OX=9606 GN=SETDB1 PE=1 SV=1	R	NA	NA	C#EWIYR	NA	NA	1	NA	NA	0.133889	1
P55209	132	NAP1L1	NAP1L1_C132	NP1L1_HUMAN Nucleosome assembly protein 1-like 1 OS=Homo sapiens OX=9606 GN=NAP1L1 PE=1 SV=1	E	NA	NA	C#EWKPDEEDEISEELK C#EWKPDEEDEISEELKEK	NA	NA	4	NA	NA	0.000992	1
Q8WWH5	331	TRUB1	TRUB1_C331	TRUB1_HUMAN Probable tRNA pseudouridine synthase 1 OS=Homo sapiens OX=9606 GN=TRUB1 PE=1 SV=1	S	NA	NA	C#EYITLNEPK	NA	NA	1	NA	NA	0.0874209	1
P49756	132	RBM25	RBM25_C132	RBM25_HUMAN RNA-binding protein 25 OS=Homo sapiens OX=9606 GN=RBM25 PE=1 SV=3	F	NA	NA	C#EYKEPESTLR	NA	NA	2	NA	NA	0.0316662	1
P78417	90	GSTO1	GSTO1_C90	GSTO1_HUMAN Glutathione S-transferase omega-1 OS=Homo sapiens OX=9606 GN=GSTO1 PE=1 SV=2	T	NA	NA	C#EYLDEAYPGK	NA	NA	1	NA	NA	0.0448793	1
Q9BXP5	628	SRRT	SRRT_C628	SRRT_HUMAN Serrate RNA effector molecule homolog OS=Homo sapiens OX=9606 GN=SRRT PE=1 SV=1	T	NA	NA	C#EYPNEDEMPNR	NA	NA	1	NA	NA	0.0833689	1
Q9UJX4	482	ANAPC5	ANAPC5_C482	APC5_HUMAN Anaphase-promoting complex subunit 5 OS=Homo sapiens OX=9606 GN=ANAPC5 PE=1 SV=2	G	NA	NA	C#FAAASEVLK	NA	NA	1	NA	NA	0.0310841	1
Q9UJM3	80	ERRFI1	ERRFI1_C80	ERRFI_HUMAN ERBB receptor feedback inhibitor 1 OS=Homo sapiens OX=9606 GN=ERRFI1 PE=1 SV=1	H	NA	NA	C#FAENGPSQK	NA	NA	1	NA	NA	0.0543797	1
Q9UNM6	49	PSMD13	PSMD13_C49	PSD13_HUMAN 26S proteasome non-ATPase regulatory subunit 13 OS=Homo sapiens OX=9606 GN=PSMD13 PE=1 SV=2	P	NA	NA	C#FAQGDGLIK	NA	NA	1	NA	NA	0.0761426	1
Q9BUK6	411	MSTO1	MSTO1_C411	MSTO1_HUMAN Protein misato homolog 1 OS=Homo sapiens OX=9606 GN=MSTO1 PE=1 SV=1	R	NA	NA	C#FAQSVVLR	NA	NA	2	NA	NA	0.128592	1
Q16658	121	FSCN1	FSCN1_C121	FSCN1_HUMAN Fascin OS=Homo sapiens OX=9606 GN=FSCN1 PE=1 SV=3	S	NA	NA	C#FAQTVSPAEK	NA	NA	2	NA	NA	0.00600851	1
Q5T4S7	2489	UBR4	UBR4_C2489	UBR4_HUMAN E3 ubiquitin-protein ligase UBR4 OS=Homo sapiens OX=9606 GN=UBR4 PE=1 SV=1	S	NA	NA	C#FAVGPIIEK	NA	NA	1	NA	NA	0.031737	1
Q5VST6	210	ABHD17B	ABHD17B_C210	AB17B_HUMAN Alpha/beta hydrolase domain-containing protein 17B OS=Homo sapiens OX=9606 GN=ABHD17B PE=1 SV=1	Y	NA	NA	C#FDAFPNIDK	NA	NA	1	NA	NA	0.171822	1
P24928	1470	POLR2A	POLR2A_C1470	RPB1_HUMAN DNA-directed RNA polymerase II subunit RPB1 OS=Homo sapiens OX=9606 GN=POLR2A PE=1 SV=2	G	NA	NA	C#FDLLLDAEK	NA	NA	1	NA	NA	0.00640882	1
Q15334	505	LLGL1	LLGL1_C505	L2GL1_HUMAN Lethal(2) giant larvae protein homolog 1 OS=Homo sapiens OX=9606 GN=LLGL1 PE=1 SV=3	G	NA	NA	C#FDPYSDDPR	NA	NA	1	NA	NA	0.260021	1
Q86VP1	719	TAX1BP1	TAX1BP1_C719	TAXB1_HUMAN Tax1-binding protein 1 OS=Homo sapiens OX=9606 GN=TAX1BP1 PE=1 SV=2	F	NA	NA	C#FDSSFDVHK	NA	NA	2	NA	NA	0.0845329	1
P42704	484	LRPPRC	LRPPRC_C484	LPPRC_HUMAN Leucine-rich PPR motif-containing protein, mitochondrial OS=Homo sapiens OX=9606 GN=LRPPRC PE=1 SV=3	P	NA	NA	C#FDSVNSAR	NA	NA	1	NA	NA	0.0946505	1
Q9BQ39	633	DDX50	DDX50_C633	DDX50_HUMAN ATP-dependent RNA helicase DDX50 OS=Homo sapiens OX=9606 GN=DDX50 PE=1 SV=1	V	NA	NA	C#FDVPTTESER	NA	NA	1	NA	NA	0.234854	1
Q9P2I0	294	CPSF2	CPSF2_C294	CPSF2_HUMAN Cleavage and polyadenylation specificity factor subunit 2 OS=Homo sapiens OX=9606 GN=CPSF2 PE=1 SV=2	R	NA	NA	C#FEDKR	NA	NA	2	NA	NA	0.321811	1
Q9BQG0	1046	MYBBP1A	MYBBP1A_C1046	MBB1A_HUMAN Myb-binding protein 1A OS=Homo sapiens OX=9606 GN=MYBBP1A PE=1 SV=2	S	NA	NA	C#FEDPEWK	NA	NA	1	NA	NA	0.0946539	1
Q6PJT7	540	ZC3H14	ZC3H14_C540	ZC3HE_HUMAN Zinc finger CCCH domain-containing protein 14 OS=Homo sapiens OX=9606 GN=ZC3H14 PE=1 SV=1	M	NA	NA	C#FEGMKPVNQT	NA	NA	1	NA	NA	0.195258	1
P11216	326	PYGB	PYGB_C326	PYGB_HUMAN Glycogen phosphorylase, brain form OS=Homo sapiens OX=9606 GN=PYGB PE=1 SV=5	T	NA	NA	C#FETFPDK	NA	NA	1	NA	NA	0.264092	1
Q96L92	487	SNX27	SNX27_C487	SNX27_HUMAN Sorting nexin-27 OS=Homo sapiens OX=9606 GN=SNX27 PE=1 SV=2	F	NA	NA	C#FEYAR	NA	NA	1	NA	NA	0.325141	1
Q9NRL2	1505	BAZ1A	BAZ1A_C1505	BAZ1A_HUMAN Bromodomain adjacent to zinc finger domain protein 1A OS=Homo sapiens OX=9606 GN=BAZ1A PE=1 SV=2	N	NA	NA	C#FEYNPR	NA	NA	1	NA	NA	0.0895493	1
Q96G46	135	DUS3L	DUS3L_C135	DUS3L_HUMAN tRNA-dihydrouridine(47) synthase [NAD(P)(+)]-like OS=Homo sapiens OX=9606 GN=DUS3L PE=1 SV=2	K	NA	NA	C#FFGDR	NA	NA	1	NA	NA	0.203026	1
Q9BW92	322	TARS2	TARS2_C322	SYTM_HUMAN Threonine--tRNA ligase, mitochondrial OS=Homo sapiens OX=9606 GN=TARS2 PE=1 SV=1	S	NA	NA	C#FFLPR	NA	NA	1	NA	NA	0.290588	1
Q9H2U2	161	PPA2	PPA2_C161	IPYR2_HUMAN Inorganic pyrophosphatase 2, mitochondrial OS=Homo sapiens OX=9606 GN=PPA2 PE=1 SV=2	N	NA	NA	C#FGDNDPIDVCEIGSK	NA	NA	1	NA	NA	0.000472826	1
Q9H7D7	577	WDR26	WDR26_C577	WDR26_HUMAN WD repeat-containing protein 26 OS=Homo sapiens OX=9606 GN=WDR26 PE=1 SV=3	S	NA	NA	C#FGGHNEDFIAS	NA	NA	1	NA	NA	0.351184	1
Q8IXI1	216	RHOT2	RHOT2_C216	MIRO2_HUMAN Mitochondrial Rho GTPase 2 OS=Homo sapiens OX=9606 GN=RHOT2 PE=1 SV=2	S	NA	NA	C#FGHPLAPQ	NA	NA	1	NA	NA	0.0433442	1
P78312	515	FAM193A	FAM193A_C515	F193A_HUMAN Protein FAM193A OS=Homo sapiens OX=9606 GN=FAM193A PE=1 SV=2	S	NA	NA	C#FGNTPEWNSSK	NA	NA	1	NA	NA	0.108919	1
P22102	93	GART	GART_C93	PUR2_HUMAN Trifunctional purine biosynthetic protein adenosine-3 OS=Homo sapiens OX=9606 GN=GART PE=1 SV=1	Q	NA	NA	C#FGPTAEAAQLESSK	NA	NA	1	NA	NA	0.000176241	1
P32019	783	INPP5B	INPP5B_C783	I5P2_HUMAN Type II inositol 1,4,5-trisphosphate 5-phosphatase OS=Homo sapiens OX=9606 GN=INPP5B PE=1 SV=4	S	NA	NA	C#FGSPIHTL	NA	NA	1	NA	NA	0.142419	1
Q99707	1104	MTR	MTR_C1104	METH_HUMAN Methionine synthase OS=Homo sapiens OX=9606 GN=MTR PE=1 SV=2	A	NA	NA	C#FGVEELSK	NA	NA	1	NA	NA	0.215997	1
Q9BUR4	374	WRAP53	WRAP53_C374	TCAB1_HUMAN Telomerase Cajal body protein 1 OS=Homo sapiens OX=9606 GN=WRAP53 PE=1 SV=1	L	NA	NA	C#FHPDGNR	NA	NA	1	NA	NA	0.328565	1
P23919	163	DTYMK	DTYMK_C163	KTHY_HUMAN Thymidylate kinase OS=Homo sapiens OX=9606 GN=DTYMK PE=1 SV=4	R	NA	NA	C#FHQLMK	NA	NA	3	NA	NA	0.01991	1
Q2KHT3	364	CLEC16A	CLEC16A_C364	CL16A_HUMAN Protein CLEC16A OS=Homo sapiens OX=9606 GN=CLEC16A PE=1 SV=2	R	NA	NA	C#FIKPTETLER	NA	NA	1	NA	NA	0.252871	1
P11586	143	MTHFD1	MTHFD1_C143	C1TC_HUMAN C-1-tetrahydrofolate synthase, cytoplasmic OS=Homo sapiens OX=9606 GN=MTHFD1 PE=1 SV=3	D	NA	NA	C#FIPCTPK	NA	NA	1	NA	NA	0.125782	1
Q14103	226	HNRNPD	HNRNPD_C226	HNRPD_HUMAN Heterogeneous nuclear ribonucleoprotein D0 OS=Homo sapiens OX=9606 GN=HNRNPD PE=1 SV=1	F	NA	NA	C#FITFK	NA	NA	1	NA	NA	0.262795	1
O14979	277	HNRNPDL	HNRNPDL_C277	HNRDL_HUMAN Heterogeneous nuclear ribonucleoprotein D-like OS=Homo sapiens OX=9606 GN=HNRNPDL PE=1 SV=3	F	NA	NA	C#FITYTDEEPVK C#FITYTDEEPVKK	NA	NA	3	NA	NA	0.00559668	1
Q8TAQ2	80	SMARCC2	SMARCC2_C80	SMRC2_HUMAN SWI/SNF complex subunit SMARCC2 OS=Homo sapiens OX=9606 GN=SMARCC2 PE=1 SV=1	K	NA	NA	C#FLDFK	NA	NA	1	NA	NA	0.375439	1
Q15834	82	CCDC85B	CCDC85B_C82	CC85B_HUMAN Coiled-coil domain-containing protein 85B OS=Homo sapiens OX=9606 GN=CCDC85B PE=1 SV=2	C	NA	NA	C#FLDSER	NA	NA	1	NA	NA	0.122326	1
Q13111	710	CHAF1A	CHAF1A_C710	CAF1A_HUMAN Chromatin assembly factor 1 subunit A OS=Homo sapiens OX=9606 GN=CHAF1A PE=1 SV=3	A	NA	NA	C#FLETLPAQEEQTPK	NA	NA	1	NA	NA	0.00312005	1
Q9BQ75	55	CMSS1	CMSS1_C55	CMS1_HUMAN Protein CMSS1 OS=Homo sapiens OX=9606 GN=CMSS1 PE=1 SV=2	E	NA	NA	C#FLIQPK	NA	NA	1	NA	NA	0.127838	1
Q9UQB8	195	BAIAP2	BAIAP2_C195	BAIP2_HUMAN Brain-specific angiogenesis inhibitor 1-associated protein 2 OS=Homo sapiens OX=9606 GN=BAIAP2 PE=1 SV=1	F	NA	NA	C#FLVEK	NA	NA	1	NA	NA	0.157978	1
Q92598	290	HSPH1	HSPH1_C290	HS105_HUMAN Heat shock protein 105 kDa OS=Homo sapiens OX=9606 GN=HSPH1 PE=1 SV=1	E	NA	NA	C#FMNDK C#FMNDKDVSGK	NA	NA	3	NA	NA	0.0776452	1
Q13137	419	CALCOCO2	CALCOCO2_C419	CACO2_HUMAN Calcium-binding and coiled-coil domain-containing protein 2 OS=Homo sapiens OX=9606 GN=CALCOCO2 PE=1 SV=1	L	NA	NA	C#FNCPICDK	NA	NA	1	NA	NA	0.392643	1
Q8NI27	202	THOC2	THOC2_C202	THOC2_HUMAN THO complex subunit 2 OS=Homo sapiens OX=9606 GN=THOC2 PE=1 SV=2	G	NA	NA	C#FNLDPNR	NA	NA	1	NA	NA	0.0682549	1
Q9H814	87	PHAX	PHAX_C87	PHAX_HUMAN Phosphorylated adapter RNA export protein OS=Homo sapiens OX=9606 GN=PHAX PE=1 SV=1	K	NA	NA	C#FNPPPKPEPF	NA	NA	2	NA	NA	0.121918	1
Q7Z5L9	65	IRF2BP2	IRF2BP2_C65	I2BP2_HUMAN Interferon regulatory factor 2-binding protein 2 OS=Homo sapiens OX=9606 GN=IRF2BP2 PE=1 SV=2	G	NA	NA	C#FPEGR	NA	NA	1	NA	NA	0.314645	1
Q6VN20	243	RANBP10	RANBP10_C243	RBP10_HUMAN Ran-binding protein 10 OS=Homo sapiens OX=9606 GN=RANBP10 PE=1 SV=1	H	NA	NA	C#FPISAR	NA	NA	1	NA	NA	0.319512	1
Q96I24	460	FUBP3	FUBP3_C460	FUBP3_HUMAN Far upstream element-binding protein 3 OS=Homo sapiens OX=9606 GN=FUBP3 PE=1 SV=2	G	NA	NA	C#FPNMAAK	NA	NA	3	NA	NA	0.174743	1
O60503	108	ADCY9	ADCY9_C108	ADCY9_HUMAN Adenylate cyclase type 9 OS=Homo sapiens OX=9606 GN=ADCY9 PE=1 SV=4	R	NA	NA	C#FPQTQR	NA	NA	1	NA	NA	0.246149	1
Q96GW9	428	MARS2	MARS2_C428	SYMM_HUMAN Methionine--tRNA ligase, mitochondrial OS=Homo sapiens OX=9606 GN=MARS2 PE=1 SV=2	T	NA	NA	C#FPSEPGLVGPSVR	NA	NA	1	NA	NA	0.271594	1
P09110	218	ACAA1	ACAA1_C218	THIK_HUMAN 3-ketoacyl-CoA thiolase, peroxisomal OS=Homo sapiens OX=9606 GN=ACAA1 PE=1 SV=2	G	NA	NA	C#FQAEIVPVTTTVHDDK	NA	NA	1	NA	NA	0.0053447	1
Q8TEQ6	973	GEMIN5	GEMIN5_C973	GEMI5_HUMAN Gem-associated protein 5 OS=Homo sapiens OX=9606 GN=GEMIN5 PE=1 SV=3	L	NA	NA	C#FQDQYVK	NA	NA	1	NA	NA	0.0325354	1
Q68EM7	53	ARHGAP17	ARHGAP17_C53	RHG17_HUMAN Rho GTPase-activating protein 17 OS=Homo sapiens OX=9606 GN=ARHGAP17 PE=1 SV=1	A	NA	NA	C#FQGQHGTDAER	NA	NA	1	NA	NA	0.0154413	1
Q9NVN8	152	GNL3L	GNL3L_C152	GNL3L_HUMAN Guanine nucleotide-binding protein-like 3-like protein OS=Homo sapiens OX=9606 GN=GNL3L PE=1 SV=1	R	NA	NA	C#FQMEEAVLR	NA	NA	1	NA	NA	0.0153957	1
P32780	344	GTF2H1	GTF2H1_C344	TF2H1_HUMAN General transcription factor IIH subunit 1 OS=Homo sapiens OX=9606 GN=GTF2H1 PE=1 SV=1	D	NA	NA	C#FQPAVK	NA	NA	1	NA	NA	0.0877222	1
Q7L576	1241	CYFIP1	CYFIP1_C1241	CYFP1_HUMAN Cytoplasmic FMR1-interacting protein 1 OS=Homo sapiens OX=9606 GN=CYFIP1 PE=1 SV=1	R	NA	NA	C#FQPPIHQS C#FQPPIHQ	NA	NA	3	NA	NA	0.0458035	1
P35658	728	NUP214	NUP214_C728	NU214_HUMAN Nuclear pore complex protein Nup214 OS=Homo sapiens OX=9606 GN=NUP214 PE=1 SV=2	A	NA	NA	C#FQVGTSEEMK	NA	NA	1	NA	NA	0.00310621	1
Q14146	324	URB2	URB2_C324	URB2_HUMAN Unhealthy ribosome biogenesis protein 2 homolog OS=Homo sapiens OX=9606 GN=URB2 PE=1 SV=2	L	NA	NA	C#FQVLPR	NA	NA	1	NA	NA	0.194924	1
P48735	235	IDH2	IDH2_C235	IDHP_HUMAN Isocitrate dehydrogenase [NADP], mitochondrial OS=Homo sapiens OX=9606 GN=IDH2 PE=1 SV=2	S	NA	NA	C#FQYAIQK	NA	NA	1	NA	NA	0.231457	1
Q8NB37	179	GATD1	GATD1_C179	GALD1_HUMAN Glutamine amidotransferase-like class 1 domain-containing protein 1 OS=Homo sapiens OX=9606 GN=GATD1 PE=1 SV=1	A	NA	NA	C#FSASEPDAVHVVLDR	NA	NA	1	NA	NA	0.00137154	1
O00567	384	NOP56	NOP56_C384	NOP56_HUMAN Nucleolar protein 56 OS=Homo sapiens OX=9606 GN=NOP56 PE=1 SV=4	D	NA	NA	C#FSEVPTSVFGEK	NA	NA	1	NA	NA	0.0547501	1
Q9UHJ3	511	SFMBT1	SFMBT1_C511	SMBT1_HUMAN Scm-like with four MBT domains protein 1 OS=Homo sapiens OX=9606 GN=SFMBT1 PE=1 SV=2	R	NA	NA	C#FSGPYLNK	NA	NA	1	NA	NA	0.158343	1
Q9NYL9	231	TMOD3	TMOD3_C231	TMOD3_HUMAN Tropomodulin-3 OS=Homo sapiens OX=9606 GN=TMOD3 PE=1 SV=1	K	NA	NA	C#FSLAATR	NA	NA	1	NA	NA	0.0736758	1
O96007	10	MOCS2	MOCS2_C10	MOC2B_HUMAN Molybdopterin synthase catalytic subunit OS=Homo sapiens OX=9606 GN=MOCS2 PE=1 SV=1	S	NA	NA	C#FSLETK	NA	NA	1	NA	NA	0.290199	1
Q14004	80	CDK13	CDK13_C80	CDK13_HUMAN Cyclin-dependent kinase 13 OS=Homo sapiens OX=9606 GN=CDK13 PE=1 SV=2	S	NA	NA	C#FSPGPPLEVK	NA	NA	1	NA	NA	0.0452659	1
Q03701	856	CEBPZ	CEBPZ_C856	CEBPZ_HUMAN CCAAT/enhancer-binding protein zeta OS=Homo sapiens OX=9606 GN=CEBPZ PE=1 SV=3	N	NA	NA	C#FSSGK C#FSSGKDDMDFAGNVK	NA	NA	2	NA	NA	0.215188	1
Q13310	339	PABPC4	PABPC4_C339	PABP4_HUMAN Polyadenylate-binding protein 4 OS=Homo sapiens OX=9606 GN=PABPC4 PE=1 SV=1	V	NA	NA	C#FSSPEEATK	NA	NA	1	NA	NA	0.00558206	1
P14866	581	HNRNPL	HNRNPL_C581	HNRPL_HUMAN Heterogeneous nuclear ribonucleoprotein L OS=Homo sapiens OX=9606 GN=HNRNPL PE=1 SV=2	L	NA	NA	C#FSTAQHAS	NA	NA	2	NA	NA	0.186356	1
Q9NRN7	296	AASDHPPT	AASDHPPT_C296	ADPPT_HUMAN L-aminoadipate-semialdehyde dehydrogenase-phosphopantetheinyl transferase OS=Homo sapiens OX=9606 GN=AASDHPPT PE=1 SV=2	F	NA	NA	C#FTEEIPIR	NA	NA	1	NA	NA	0.0142429	1
Q96CB9	131	NSUN4	NSUN4_C131	NSUN4_HUMAN 5-methylcytosine rRNA methyltransferase NSUN4 OS=Homo sapiens OX=9606 GN=NSUN4 PE=1 SV=2	R	NA	NA	C#FTFDR	NA	NA	1	NA	NA	0.354124	1
Q7KZF4	96	SND1	SND1_C96	SND1_HUMAN Staphylococcal nuclease domain-containing protein 1 OS=Homo sapiens OX=9606 GN=SND1 PE=1 SV=1	V	NA	NA	C#FTIENK	NA	NA	1	NA	NA	0.0987074	1
Q8IV20	342	LACC1	LACC1_C342	LACC1_HUMAN Laccase domain-containing protein 1 OS=Homo sapiens OX=9606 GN=LACC1 PE=1 SV=1	C	NA	NA	C#FTLPR	NA	NA	1	NA	NA	0.302713	1
P49327	1118	FASN	FASN_C1118	FAS_HUMAN Fatty acid synthase OS=Homo sapiens OX=9606 GN=FASN PE=1 SV=3	F	NA	NA	C#FTPHTEEGCLSER C#FTPHTEEGCLS C#FTPHTEE C#FTPHTEEG C#FTPHTEEGCL	NA	NA	8	NA	NA	0.0850149	1
Q9BV44	239	THUMPD3	THUMPD3_C239	THUM3_HUMAN THUMP domain-containing protein 3 OS=Homo sapiens OX=9606 GN=THUMPD3 PE=1 SV=1	H	NA	NA	C#FTSNEAAR	NA	NA	1	NA	NA	0.0266683	1
Q9ULP9	8	TBC1D24	TBC1D24_C8	TBC24_HUMAN TBC1 domain family member 24 OS=Homo sapiens OX=9606 GN=TBC1D24 PE=1 SV=2	N	NA	NA	C#FVDKDK	NA	NA	2	NA	NA	0.158318	1
P52701	559	MSH6	MSH6_C559	MSH6_HUMAN DNA mismatch repair protein Msh6 OS=Homo sapiens OX=9606 GN=MSH6 PE=1 SV=2	V	NA	NA	C#FVDTSLGK	NA	NA	1	NA	NA	0.0704505	1
Q9NUP7	185	TRMT13	TRMT13_C185	TRM13_HUMAN tRNA:m(4)X modification enzyme TRM13 homolog OS=Homo sapiens OX=9606 GN=TRMT13 PE=1 SV=2	R	NA	NA	C#FVEFGAGK	NA	NA	1	NA	NA	0.029144	1
Q5QJE6	464	DNTTIP2	DNTTIP2_C464	TDIF2_HUMAN Deoxynucleotidyltransferase terminal-interacting protein 2 OS=Homo sapiens OX=9606 GN=DNTTIP2 PE=1 SV=2	L	NA	NA	C#FVENSGQR	NA	NA	1	NA	NA	0.0456738	1
O95478	154	NSA2	NSA2_C154	NSA2_HUMAN Ribosome biogenesis protein NSA2 homolog OS=Homo sapiens OX=9606 GN=NSA2 PE=1 SV=1	V	NA	NA	C#FVGDGFTR	NA	NA	1	NA	NA	0.09928	1
O43143	599	DHX15	DHX15_C599	DHX15_HUMAN Pre-mRNA-splicing factor ATP-dependent RNA helicase DHX15 OS=Homo sapiens OX=9606 GN=DHX15 PE=1 SV=2	Q	NA	NA	C#FVRPTEAK	NA	NA	2	NA	NA	0.0701747	1
Q14692	757	BMS1	BMS1_C757	BMS1_HUMAN Ribosome biogenesis protein BMS1 homolog OS=Homo sapiens OX=9606 GN=BMS1 PE=1 SV=1	D	NA	NA	C#FVTGK	NA	NA	1	NA	NA	0.325922	1
P05771	71	PRKCB	PRKCB_C71	KPCB_HUMAN Protein kinase C beta type OS=Homo sapiens OX=9606 GN=PRKCB PE=1 SV=4	C	NA	NA	C#FVVHK	NA	NA	1	NA	NA	0.252027	1
Q9NW13	33	RBM28	RBM28_C33	RBM28_HUMAN RNA-binding protein 28 OS=Homo sapiens OX=9606 GN=RBM28 PE=1 SV=3	Q	NA	NA	C#FVVTEK	NA	NA	1	NA	NA	0.130106	1
Q9NR30	291	DDX21	DDX21_C291	DDX21_HUMAN Nucleolar RNA helicase 2 OS=Homo sapiens OX=9606 GN=DDX21 PE=1 SV=5	A	NA	NA	C#FYGGTPYGGQFER	NA	NA	1	NA	NA	0.150148	1
Q9BTE6	266	AARSD1	AARSD1_C266	AASD1_HUMAN Alanyl-tRNA editing protein Aarsd1 OS=Homo sapiens OX=9606 GN=AARSD1 PE=1 SV=2	K	NA	NA	C#GAEDHVEAVK	NA	NA	2	NA	NA	0.0459982	1
Q9HCU5	128	PREB	PREB_C128	PREB_HUMAN Prolactin regulatory element-binding protein OS=Homo sapiens OX=9606 GN=PREB PE=1 SV=2	K	NA	NA	C#GAETQHEGLELR	NA	NA	1	NA	NA	0.00523005	1
Q9UPN9	582	TRIM33	TRIM33_C582	TRI33_HUMAN E3 ubiquitin-protein ligase TRIM33 OS=Homo sapiens OX=9606 GN=TRIM33 PE=1 SV=3	N	NA	NA	C#GAFQAH	NA	NA	2	NA	NA	0.215406	1
Q9NZB2	919	FAM120A	FAM120A_C919	F120A_HUMAN Constitutive coactivator of PPAR-gamma-like protein 1 OS=Homo sapiens OX=9606 GN=FAM120A PE=1 SV=2	H	NA	NA	C#GAFSGSDSSR	NA	NA	1	NA	NA	0.00506089	1
Q3B7T1	918	EDRF1	EDRF1_C918	EDRF1_HUMAN Erythroid differentiation-related factor 1 OS=Homo sapiens OX=9606 GN=EDRF1 PE=1 SV=1	H	NA	NA	C#GAGDELKR	NA	NA	2	NA	NA	0.0120351	1
Q9BV86	68	NTMT1	NTMT1_C68	NTM1A_HUMAN N-terminal Xaa-Pro-Lys N-methyltransferase 1 OS=Homo sapiens OX=9606 GN=NTMT1 PE=1 SV=3	D	NA	NA	C#GAGIGR	NA	NA	1	NA	NA	0.0778	1
P52789	834	HK2	HK2_C834	HXK2_HUMAN Hexokinase-2 OS=Homo sapiens OX=9606 GN=HK2 PE=1 SV=2	L	NA	NA	C#GAGMAAVVDR	NA	NA	1	NA	NA	0.316808	1
P21359	454	NF1	NF1_C454	NF1_HUMAN Neurofibromin OS=Homo sapiens OX=9606 GN=NF1 PE=1 SV=2	G	NA	NA	C#GAHPAIR	NA	NA	1	NA	NA	0.351725	1
P36542	103	ATP5F1C	ATP5F1C_C103	ATPG_HUMAN ATP synthase subunit gamma, mitochondrial OS=Homo sapiens OX=9606 GN=ATP5F1C PE=1 SV=1	L	NA	NA	C#GAIHSSIAK	NA	NA	1	NA	NA	0.396531	1
Q7L2H7	134	EIF3M	EIF3M_C134	EIF3M_HUMAN Eukaryotic translation initiation factor 3 subunit M OS=Homo sapiens OX=9606 GN=EIF3M PE=1 SV=1	S	NA	NA	C#GAIQYIPTELDQVR	NA	NA	1	NA	NA	0.00155572	1
O15084	261	ANKRD28	ANKRD28_C261	ANR28_HUMAN Serine/threonine-protein phosphatase 6 regulatory ankyrin repeat subunit A OS=Homo sapiens OX=9606 GN=ANKRD28 PE=1 SV=5	D	NA	NA	C#GAIVNQK	NA	NA	1	NA	NA	0.333226	1
Q7Z7A3	290	CTU1	CTU1_C290	CTU1_HUMAN Cytoplasmic tRNA 2-thiolation protein 1 OS=Homo sapiens OX=9606 GN=CTU1 PE=1 SV=1	R	NA	NA	C#GALASR	NA	NA	1	NA	NA	0.157378	1
Q6XUX3	320	DSTYK	DSTYK_C320	DUSTY_HUMAN Dual serine/threonine and tyrosine protein kinase OS=Homo sapiens OX=9606 GN=DSTYK PE=1 SV=2	N	NA	NA	C#GAPGQDTK	NA	NA	1	NA	NA	0.0159163	1
O43502	124	RAD51C	RAD51C_C124	RA51C_HUMAN DNA repair protein RAD51 homolog 3 OS=Homo sapiens OX=9606 GN=RAD51C PE=1 SV=1	I	NA	NA	C#GAPGVGK	NA	NA	1	NA	NA	0.070461	1
P04080	3	CSTB	CSTB_C3	CYTB_HUMAN Cystatin-B OS=Homo sapiens OX=9606 GN=CSTB PE=1 SV=2	M	NA	NA	C#GAPSATQPATAETQHIADQVR	NA	NA	1	NA	NA	0.000594432	1
O75113	56	N4BP1	N4BP1_C56	N4BP1_HUMAN NEDD4-binding protein 1 OS=Homo sapiens OX=9606 GN=N4BP1 PE=1 SV=4	L	NA	NA	C#GAQEAVHSAK	NA	NA	1	NA	NA	0.163189	1
P18754	352	RCC1	RCC1_C352	RCC1_HUMAN Regulator of chromosome condensation OS=Homo sapiens OX=9606 GN=RCC1 PE=1 SV=1	A	NA	NA	C#GASVGYAVTK	NA	NA	1	NA	NA	0.00876409	1
Q5SYE7	764	NHSL1	NHSL1_C764	NHSL1_HUMAN NHS-like protein 1 OS=Homo sapiens OX=9606 GN=NHSL1 PE=1 SV=2	L	NA	NA	C#GATPSQSDTSSVK	NA	NA	1	NA	NA	0.190072	1
O43156	940	TTI1	TTI1_C940	TTI1_HUMAN TELO2-interacting protein 1 homolog OS=Homo sapiens OX=9606 GN=TTI1 PE=1 SV=3	K	NA	NA	C#GDFLR	NA	NA	1	NA	NA	0.338491	1
P40938	32	RFC3	RFC3_C32	RFC3_HUMAN Replication factor C subunit 3 OS=Homo sapiens OX=9606 GN=RFC3 PE=1 SV=2	Q	NA	NA	C#GDFPHLL	NA	NA	1	NA	NA	0.205127	1
Q9NRX1	64	PNO1	PNO1_C64	PNO1_HUMAN RNA-binding protein PNO1 OS=Homo sapiens OX=9606 GN=PNO1 PE=1 SV=1	L	NA	NA	C#GDGLLSGK	NA	NA	1	NA	NA	0.0372953	1
Q13098	175	GPS1	GPS1_C175	CSN1_HUMAN COP9 signalosome complex subunit 1 OS=Homo sapiens OX=9606 GN=GPS1 PE=1 SV=4	D	NA	NA	C#GDLSNALK	NA	NA	1	NA	NA	0.0648039	1
Q15181	114	PPA1	PPA1_C114	IPYR_HUMAN Inorganic pyrophosphatase OS=Homo sapiens OX=9606 GN=PPA1 PE=1 SV=2	C	NA	NA	C#GDNDPIDVCEIGSK	NA	NA	1	NA	NA	0.000901778	1
Q8TD19	487	NEK9	NEK9_C487	NEK9_HUMAN Serine/threonine-protein kinase Nek9 OS=Homo sapiens OX=9606 GN=NEK9 PE=1 SV=2	S	NA	NA	C#GDNHVVVLTR	NA	NA	1	NA	NA	0.019596	1
P22102	646	GART	GART_C646	PUR2_HUMAN Trifunctional purine biosynthetic protein adenosine-3 OS=Homo sapiens OX=9606 GN=GART PE=1 SV=1	G	NA	NA	C#GDQTLGDLLLTPTR	NA	NA	1	NA	NA	0.00163064	1
Q8TD19	25	NEK9	NEK9_C25	NEK9_HUMAN Serine/threonine-protein kinase Nek9 OS=Homo sapiens OX=9606 GN=NEK9 PE=1 SV=2	G	NA	NA	C#GDSSPGPSASQGPR	NA	NA	2	NA	NA	0.00568405	1
Q16527	122	CSRP2	CSRP2_C122	CSRP2_HUMAN Cysteine and glycine-rich protein 2 OS=Homo sapiens OX=9606 GN=CSRP2 PE=1 SV=3	R	NA	NA	C#GDSVYAAEK	NA	NA	1	NA	NA	0.0346153	1
Q8TBC4	28	UBA3	UBA3_C28	UBA3_HUMAN NEDD8-activating enzyme E1 catalytic subunit OS=Homo sapiens OX=9606 GN=UBA3 PE=1 SV=2	G	NA	NA	C#GDTGDWEGR	NA	NA	1	NA	NA	0.0326736	1
O00410	266	IPO5	IPO5_C266	IPO5_HUMAN Importin-5 OS=Homo sapiens OX=9606 GN=IPO5 PE=1 SV=4	L	NA	NA	C#GDTSLNNMQR	NA	NA	2	NA	NA	0.110182	1
P78347	745	GTF2I	GTF2I_C745	GTF2I_HUMAN General transcription factor II-I OS=Homo sapiens OX=9606 GN=GTF2I PE=1 SV=2	K	NA	NA	C#GEALGLK	NA	NA	1	NA	NA	0.0178059	1
Q15013	221	MAD2L1BP	MAD2L1BP_C221	MD2BP_HUMAN MAD2L1-binding protein OS=Homo sapiens OX=9606 GN=MAD2L1BP PE=1 SV=1	N	NA	NA	C#GEDWFRPK	NA	NA	1	NA	NA	0.406245	1
O75879	228	GATB	GATB_C228	GATB_HUMAN Glutamyl-tRNA(Gln) amidotransferase subunit B, mitochondrial OS=Homo sapiens OX=9606 GN=GATB PE=1 SV=1	S	NA	NA	C#GEEAATAVR	NA	NA	1	NA	NA	0.0293057	1
Q8NB91	450	FANCB	FANCB_C450	FANCB_HUMAN Fanconi anemia group B protein OS=Homo sapiens OX=9606 GN=FANCB PE=1 SV=1	L	NA	NA	C#GEEENSVHIL	NA	NA	1	NA	NA	0.193487	1
Q9NUD5	356	ZCCHC3	ZCCHC3_C356	ZCHC3_HUMAN Zinc finger CCHC domain-containing protein 3 OS=Homo sapiens OX=9606 GN=ZCCHC3 PE=1 SV=2	R	NA	NA	C#GEEGHLSPY	NA	NA	1	NA	NA	0.0538143	1
P26640	682	VARS	VARS_C682	SYVC_HUMAN Valine--tRNA ligase OS=Homo sapiens OX=9606 GN=VARS PE=1 SV=4	R	NA	NA	C#GEMAQAASAAVTR	NA	NA	1	NA	NA	0.284058	1
Q9C0D5	1611	TANC1	TANC1_C1611	TANC1_HUMAN Protein TANC1 OS=Homo sapiens OX=9606 GN=TANC1 PE=1 SV=3	Q	NA	NA	C#GENGPAHPLPSK	NA	NA	2	NA	NA	0.0141233	1
Q96EF6	114	FBXO17	FBXO17_C114	FBX17_HUMAN F-box only protein 17 OS=Homo sapiens OX=9606 GN=FBXO17 PE=1 SV=1	S	NA	NA	C#GEQGFR	NA	NA	1	NA	NA	0.294421	1
Q66K64	365	DCAF15	DCAF15_C365	DCA15_HUMAN DDB1- and CUL4-associated factor 15 OS=Homo sapiens OX=9606 GN=DCAF15 PE=1 SV=1	L	NA	NA	C#GETAPR	NA	NA	1	NA	NA	0.102925	1
Q9H2U2	180	PPA2	PPA2_C180	IPYR2_HUMAN Inorganic pyrophosphatase 2, mitochondrial OS=Homo sapiens OX=9606 GN=PPA2 PE=1 SV=2	S	NA	NA	C#GEVIHVK	NA	NA	1	NA	NA	0.170012	1
Q6PCB5	595	RSBN1L	RSBN1L_C595	RSBNL_HUMAN Lysine-specific demethylase RSBN1L OS=Homo sapiens OX=9606 GN=RSBN1L PE=1 SV=2	H	NA	NA	C#GEWPDQPR	NA	NA	1	NA	NA	0.104597	1
Q15149	4494	PLEC	PLEC_C4494	PLEC_HUMAN Plectin OS=Homo sapiens OX=9606 GN=PLEC PE=1 SV=3	F	NA	NA	C#GFEDPR	NA	NA	1	NA	NA	0.344145	1
O75420	177	GIGYF1	GIGYF1_C177	GGYF1_HUMAN GRB10-interacting GYF protein 1 OS=Homo sapiens OX=9606 GN=GIGYF1 PE=1 SV=2	R	NA	NA	C#GFEEGGAGPR	NA	NA	2	NA	NA	0.0615824	1
O00148	62	DDX39A	DDX39A_C62	DX39A_HUMAN ATP-dependent RNA helicase DDX39A OS=Homo sapiens OX=9606 GN=DDX39A PE=1 SV=2	D	NA	NA	C#GFEHPSEVQ	NA	NA	1	NA	NA	0.0564944	1
Q13616	496	CUL1	CUL1_C496	CUL1_HUMAN Cullin-1 OS=Homo sapiens OX=9606 GN=CUL1 PE=1 SV=2	A	NA	NA	C#GFEYTSK	NA	NA	1	NA	NA	0.091278	1
Q13395	202	TARBP1	TARBP1_C202	TARB1_HUMAN Probable methyltransferase TARBP1 OS=Homo sapiens OX=9606 GN=TARBP1 PE=1 SV=1	Q	NA	NA	C#GGAALR	NA	NA	1	NA	NA	0.265604	1
Q07820	16	MCL1	MCL1_C16	MCL1_HUMAN Induced myeloid leukemia cell differentiation protein Mcl-1 OS=Homo sapiens OX=9606 GN=MCL1 PE=1 SV=3	Y	NA	NA	C#GGAGLGAGSGGATR	NA	NA	1	NA	NA	0.00404956	1
O95573	450	ACSL3	ACSL3_C450	ACSL3_HUMAN Long-chain-fatty-acid--CoA ligase 3 OS=Homo sapiens OX=9606 GN=ACSL3 PE=1 SV=3	L	NA	NA	C#GGAPLSATTQR	NA	NA	1	NA	NA	0.00963902	1
O60494	1978	CUBN	CUBN_C1978	CUBN_HUMAN Cubilin OS=Homo sapiens OX=9606 GN=CUBN PE=1 SV=5	A	NA	NA	C#GGFLR	NA	NA	1	NA	NA	0.231358	1
Q9BXB4	34	OSBPL11	OSBPL11_C34	OSB11_HUMAN Oxysterol-binding protein-related protein 11 OS=Homo sapiens OX=9606 GN=OSBPL11 PE=1 SV=2	S	NA	NA	C#GGGISSSSSSR	NA	NA	1	NA	NA	0.022323	1
Q9H6L2	186	TMEM231	TMEM231_C186	TM231_HUMAN Transmembrane protein 231 OS=Homo sapiens OX=9606 GN=TMEM231 PE=1 SV=1	S	NA	NA	C#GGLDAR	NA	NA	1	NA	NA	0.204325	1
P26358	1148	DNMT1	DNMT1_C1148	DNMT1_HUMAN DNA (cytosine-5)-methyltransferase 1 OS=Homo sapiens OX=9606 GN=DNMT1 PE=1 SV=2	G	NA	NA	C#GGLSEGFHQA	NA	NA	1	NA	NA	0.0357655	1
Q9Y6E0	394	STK24	STK24_C394	STK24_HUMAN Serine/threonine-protein kinase 24 OS=Homo sapiens OX=9606 GN=STK24 PE=1 SV=1	A	NA	NA	C#GGNLGSIEELR	NA	NA	1	NA	NA	0.00139386	1
O75122	976	CLASP2	CLASP2_C976	CLAP2_HUMAN CLIP-associating protein 2 OS=Homo sapiens OX=9606 GN=CLASP2 PE=1 SV=3	M	NA	NA	C#GGPGMSDPR	NA	NA	1	NA	NA	0.03341	1
Q12874	274	SF3A3	SF3A3_C274	SF3A3_HUMAN Splicing factor 3A subunit 3 OS=Homo sapiens OX=9606 GN=SF3A3 PE=1 SV=1	K	NA	NA	C#GGTLEER	NA	NA	1	NA	NA	0.0160952	1
Q6IQ49	415	SDE2	SDE2_C415	SDE2_HUMAN Replication stress response regulator SDE2 OS=Homo sapiens OX=9606 GN=SDE2 PE=1 SV=1	K	NA	NA	C#GGTLQER	NA	NA	1	NA	NA	0.0168955	1
Q96CM8	378	ACSF2	ACSF2_C378	ACSF2_HUMAN Medium-chain acyl-CoA ligase ACSF2, mitochondrial OS=Homo sapiens OX=9606 GN=ACSF2 PE=1 SV=2	M	NA	NA	C#GGVIAGSPAPPELIR	NA	NA	1	NA	NA	0.00736561	1
Q9HDC5	15	JPH1	JPH1_C15	JPH1_HUMAN Junctophilin-1 OS=Homo sapiens OX=9606 GN=JPH1 PE=1 SV=2	Y	NA	NA	C#GGWEEGK	NA	NA	1	NA	NA	0.382896	1
Q9Y570	347	PPME1	PPME1_C347	PPME1_HUMAN Protein phosphatase methylesterase 1 OS=Homo sapiens OX=9606 GN=PPME1 PE=1 SV=3	Q	NA	NA	C#GHAVHEDAPDK	NA	NA	2	NA	NA	0.0562319	1
Q99570	358	PIK3R4	PIK3R4_C358	PI3R4_HUMAN Phosphoinositide 3-kinase regulatory subunit 4 OS=Homo sapiens OX=9606 GN=PIK3R4 PE=1 SV=3	L	NA	NA	C#GHDLPEK	NA	NA	1	NA	NA	0.186522	1
P24752	142	ACAT1	ACAT1_C142	THIL_HUMAN Acetyl-CoA acetyltransferase, mitochondrial OS=Homo sapiens OX=9606 GN=ACAT1 PE=1 SV=1	M	NA	NA	C#GHQDVMVA	NA	NA	1	NA	NA	0.0717555	1
P52272	676	HNRNPM	HNRNPM_C676	HNRPM_HUMAN Heterogeneous nuclear ribonucleoprotein M OS=Homo sapiens OX=9606 GN=HNRNPM PE=1 SV=3	E	NA	NA	C#GHVLYADIK	NA	NA	2	NA	NA	0.11116	1
O75940	214	SMNDC1	SMNDC1_C214	SPF30_HUMAN Survival of motor neuron-related-splicing factor 30 OS=Homo sapiens OX=9606 GN=SMNDC1 PE=1 SV=1	T	NA	NA	C#GIADKPMTQYQDTSK C#GIADKPMTQ C#GIADKPMTQY	NA	NA	5	NA	NA	0.0150225	1
P08621	39	SNRNP70	SNRNP70_C39	RU17_HUMAN U1 small nuclear ribonucleoprotein 70 kDa OS=Homo sapiens OX=9606 GN=SNRNP70 PE=1 SV=2	Y	NA	NA	C#GIAPYIR	NA	NA	1	NA	NA	0.0554367	1
Q9Y312	181	AAR2	AAR2_C181	AAR2_HUMAN Protein AAR2 homolog OS=Homo sapiens OX=9606 GN=AAR2 PE=1 SV=2	R	NA	NA	C#GIECK	NA	NA	1	NA	NA	0.171198	1
Q8N8Q9	340	NIPA2	NIPA2_C340	NIPA2_HUMAN Magnesium transporter NIPA2 OS=Homo sapiens OX=9606 GN=NIPA2 PE=2 SV=1	T	NA	NA	C#GIEQHTGENVSR	NA	NA	2	NA	NA	0.1465	1
Q96PU8	35	QKI	QKI_C35	QKI_HUMAN Protein quaking OS=Homo sapiens OX=9606 GN=QKI PE=1 SV=1	F	NA	NA	C#GIFNHLER	NA	NA	1	NA	NA	0.0290161	1
Q9BXP5	640	SRRT	SRRT_C640	SRRT_HUMAN Serrate RNA effector molecule homolog OS=Homo sapiens OX=9606 GN=SRRT PE=1 SV=1	R	NA	NA	C#GIIHVR	NA	NA	2	NA	NA	0.0410746	1
P49756	644	RBM25	RBM25_C644	RBM25_HUMAN RNA-binding protein 25 OS=Homo sapiens OX=9606 GN=RBM25 PE=1 SV=3	P	NA	NA	C#GIIIPH	NA	NA	1	NA	NA	0.187992	1
P26639	107	TARS	TARS_C107	SYTC_HUMAN Threonine--tRNA ligase, cytoplasmic OS=Homo sapiens OX=9606 GN=TARS PE=1 SV=3	A	NA	NA	C#GISQGLADNTVIAK	NA	NA	1	NA	NA	4.86e-05	1
P13489	220	RNH1	RNH1_C220	RINI_HUMAN Ribonuclease inhibitor OS=Homo sapiens OX=9606 GN=RNH1 PE=1 SV=2	L	NA	NA	C#GIVASK	NA	NA	1	NA	NA	0.21753	1
Q5TFE4	179	NT5DC1	NT5DC1_C179	NT5D1_HUMAN 5'-nucleotidase domain-containing protein 1 OS=Homo sapiens OX=9606 GN=NT5DC1 PE=1 SV=1	N	NA	NA	C#GIYFPEIK	NA	NA	1	NA	NA	0.0933941	1
Q8TEQ6	793	GEMIN5	GEMIN5_C793	GEMI5_HUMAN Gem-associated protein 5 OS=Homo sapiens OX=9606 GN=GEMIN5 PE=1 SV=3	P	NA	NA	C#GLAPAVSR	NA	NA	1	NA	NA	0.0234879	1
Q14008	1946	CKAP5	CKAP5_C1946	CKAP5_HUMAN Cytoskeleton-associated protein 5 OS=Homo sapiens OX=9606 GN=CKAP5 PE=1 SV=3	R	NA	NA	C#GLDNTK	NA	NA	1	NA	NA	0.0572513	1
Q9H8H0	368	NOL11	NOL11_C368	NOL11_HUMAN Nucleolar protein 11 OS=Homo sapiens OX=9606 GN=NOL11 PE=1 SV=1	G	NA	NA	C#GLGFQNSEQSR	NA	NA	2	NA	NA	0.0505455	1
Q14781	284	CBX2	CBX2_C284	CBX2_HUMAN Chromobox protein homolog 2 OS=Homo sapiens OX=9606 GN=CBX2 PE=1 SV=2	K	NA	NA	C#GLGLDLK	NA	NA	1	NA	NA	0.12958	1
P24386	580	CHM	CHM_C580	RAE1_HUMAN Rab proteins geranylgeranyltransferase component A 1 OS=Homo sapiens OX=9606 GN=CHM PE=1 SV=3	D	NA	NA	C#GLGNDNAVK	NA	NA	1	NA	NA	0.00248454	1
P26374	582	CHML	CHML_C582	RAE2_HUMAN Rab proteins geranylgeranyltransferase component A 2 OS=Homo sapiens OX=9606 GN=CHML PE=1 SV=2	D	NA	NA	C#GLGNEHAVK	NA	NA	2	NA	NA	0.062794	1
Q9UKJ3	247	GPATCH8	GPATCH8_C247	GPTC8_HUMAN G patch domain-containing protein 8 OS=Homo sapiens OX=9606 GN=GPATCH8 PE=1 SV=2	S	NA	NA	C#GLGSEFSTDK	NA	NA	1	NA	NA	0.0126756	1
O60684	467	KPNA6	KPNA6_C467	IMA7_HUMAN Importin subunit alpha-7 OS=Homo sapiens OX=9606 GN=KPNA6 PE=1 SV=1	Y	NA	NA	C#GLIEEAYGLDK	NA	NA	1	NA	NA	0.00526733	1
Q5JRX3	627	PITRM1	PITRM1_C627	PREP_HUMAN Presequence protease, mitochondrial OS=Homo sapiens OX=9606 GN=PITRM1 PE=1 SV=3	G	NA	NA	C#GLLDYR	NA	NA	1	NA	NA	0.181785	1
Q6P9B9	58	INTS5	INTS5_C58	INT5_HUMAN Integrator complex subunit 5 OS=Homo sapiens OX=9606 GN=INTS5 PE=1 SV=1	R	NA	NA	C#GLLLLR	NA	NA	1	NA	NA	0.267854	1
Q9Y4D8	120	HECTD4	HECTD4_C120	HECD4_HUMAN Probable E3 ubiquitin-protein ligase HECTD4 OS=Homo sapiens OX=9606 GN=HECTD4 PE=1 SV=5	S	NA	NA	C#GLPIK	NA	NA	1	NA	NA	0.239195	1
Q9H5V9	96	CXorf56	CXorf56_C96	CX056_HUMAN UPF0428 protein CXorf56 OS=Homo sapiens OX=9606 GN=CXorf56 PE=1 SV=1	K	NA	NA	C#GLPLFYQSQPK	NA	NA	1	NA	NA	0.0448609	1
O43896	711	KIF1C	KIF1C_C711	KIF1C_HUMAN Kinesin-like protein KIF1C OS=Homo sapiens OX=9606 GN=KIF1C PE=1 SV=3	R	NA	NA	C#GLPSSGK	NA	NA	1	NA	NA	0.0321414	1
Q96EK9	7	KTI12	KTI12_C7	KTI12_HUMAN Protein KTI12 homolog OS=Homo sapiens OX=9606 GN=KTI12 PE=1 SV=1	F	NA	NA	C#GLPYSGK	NA	NA	2	NA	NA	0.214667	1
Q07864	1935	POLE	POLE_C1935	DPOE1_HUMAN DNA polymerase epsilon catalytic subunit A OS=Homo sapiens OX=9606 GN=POLE PE=1 SV=5	H	NA	NA	C#GLQDSQK	NA	NA	1	NA	NA	0.049259	1
Q9H1I8	212	ASCC2	ASCC2_C212	ASCC2_HUMAN Activating signal cointegrator 1 complex subunit 2 OS=Homo sapiens OX=9606 GN=ASCC2 PE=1 SV=3	H	NA	NA	C#GLQGDGANTTPQK	NA	NA	1	NA	NA	0.0113258	1
Q9BPX3	611	NCAPG	NCAPG_C611	CND3_HUMAN Condensin complex subunit 3 OS=Homo sapiens OX=9606 GN=NCAPG PE=1 SV=1	C	NA	NA	C#GLQNQDFAR	NA	NA	1	NA	NA	0.262617	1
P13489	38	RNH1	RNH1_C38	RINI_HUMAN Ribonuclease inhibitor OS=Homo sapiens OX=9606 GN=RNH1 PE=1 SV=2	D	NA	NA	C#GLTEAR	NA	NA	1	NA	NA	0.0633005	1
Q96I24	366	FUBP3	FUBP3_C366	FUBP3_HUMAN Far upstream element-binding protein 3 OS=Homo sapiens OX=9606 GN=FUBP3 PE=1 SV=2	K	NA	NA	C#GLVIGK	NA	NA	1	NA	NA	0.0926987	1
P46060	152	RANGAP1	RANGAP1_C152	RAGP1_HUMAN Ran GTPase-activating protein 1 OS=Homo sapiens OX=9606 GN=RANGAP1 PE=1 SV=1	N	NA	NA	C#GMGIGGGK	NA	NA	1	NA	NA	0.28208	1
P10155	141	RO60	RO60_C141	RO60_HUMAN 60 kDa SS-A/Ro ribonucleoprotein OS=Homo sapiens OX=9606 GN=RO60 PE=1 SV=2	K	NA	NA	C#GMWGR	NA	NA	1	NA	NA	0.190851	1
O75164	689	KDM4A	KDM4A_C689	KDM4A_HUMAN Lysine-specific demethylase 4A OS=Homo sapiens OX=9606 GN=KDM4A PE=1 SV=2	N	NA	NA	C#GNASDLAPQK	NA	NA	1	NA	NA	0.0179053	1
P78368	54	CSNK1G2	CSNK1G2_C54	KC1G2_HUMAN Casein kinase I isoform gamma-2 OS=Homo sapiens OX=9606 GN=CSNK1G2 PE=1 SV=1	G	NA	NA	C#GNFGELR	NA	NA	1	NA	NA	0.0889	1
Q92804	365	TAF15	TAF15_C365	RBP56_HUMAN TATA-binding protein-associated factor 2N OS=Homo sapiens OX=9606 GN=TAF15 PE=1 SV=1	S	NA	NA	C#GNMNFAR	NA	NA	1	NA	NA	0.0569047	1
Q01844	529	EWSR1	EWSR1_C529	EWS_HUMAN RNA-binding protein EWS OS=Homo sapiens OX=9606 GN=EWSR1 PE=1 SV=1	G	NA	NA	C#GNQNFAWR	NA	NA	1	NA	NA	0.0866059	1
P23468	1615	PTPRD	PTPRD_C1615	PTPRD_HUMAN Receptor-type tyrosine-protein phosphatase delta OS=Homo sapiens OX=9606 GN=PTPRD PE=1 SV=2	T	NA	NA	C#GNTEVPAR	NA	NA	1	NA	NA	0.242185	1
P38117	66	ETFB	ETFB_C66	ETFB_HUMAN Electron transfer flavoprotein subunit beta OS=Homo sapiens OX=9606 GN=ETFB PE=1 SV=3	S	NA	NA	C#GPAQCQETIR	NA	NA	1	NA	NA	0.335034	1
Q9HB90	52	RRAGC	RRAGC_C52	RRAGC_HUMAN Ras-related GTP-binding protein C OS=Homo sapiens OX=9606 GN=RRAGC PE=1 SV=1	G	NA	NA	C#GPGGADSSKPR	NA	NA	1	NA	NA	0.0140914	1
Q9BSU1	222	C16orf70	C16orf70_C222	CP070_HUMAN UPF0183 protein C16orf70 OS=Homo sapiens OX=9606 GN=C16orf70 PE=1 SV=1	G	NA	NA	C#GPGLLADAK	NA	NA	2	NA	NA	0.0539204	1
Q9BWJ5	76	SF3B5	SF3B5_C76	SF3B5_HUMAN Splicing factor 3B subunit 5 OS=Homo sapiens OX=9606 GN=SF3B5 PE=1 SV=1	P	NA	NA	C#GPPADKPEEN	NA	NA	1	NA	NA	0.0518145	1
Q8WVB6	373	CHTF18	CHTF18_C373	CTF18_HUMAN Chromosome transmission fidelity protein 18 homolog OS=Homo sapiens OX=9606 GN=CHTF18 PE=1 SV=1	L	NA	NA	C#GPPGLGK	NA	NA	1	NA	NA	0.216487	1
Q9NXH9	376	TRMT1	TRMT1_C376	TRM1_HUMAN tRNA (guanine(26)-N(2))-dimethyltransferase OS=Homo sapiens OX=9606 GN=TRMT1 PE=1 SV=1	A	NA	NA	C#GPPVTPECEHCGQR	NA	NA	1	NA	NA	0.014926	1
Q06323	101	PSME1	PSME1_C101	PSME1_HUMAN Proteasome activator complex subunit 1 OS=Homo sapiens OX=9606 GN=PSME1 PE=1 SV=1	P	NA	NA	C#GPVNCNEK	NA	NA	1	NA	NA	0.0284734	1
P21980	371	TGM2	TGM2_C371	TGM2_HUMAN Protein-glutamine gamma-glutamyltransferase 2 OS=Homo sapiens OX=9606 GN=TGM2 PE=1 SV=2	C	NA	NA	C#GPVPVR	NA	NA	1	NA	NA	0.175304	1
Q92598	650	HSPH1	HSPH1_C650	HS105_HUMAN Heat shock protein 105 kDa OS=Homo sapiens OX=9606 GN=HSPH1 PE=1 SV=1	L	NA	NA	C#GPYEK	NA	NA	2	NA	NA	0.271126	1
Q99873	33	PRMT1	PRMT1_C33	ANM1_HUMAN Protein arginine N-methyltransferase 1 OS=Homo sapiens OX=9606 GN=PRMT1 PE=1 SV=3	S	NA	NA	C#GQAESSEKPNAEDMTSK	NA	NA	3	NA	NA	0.000223	1
Q68DK2	66	ZFYVE26	ZFYVE26_C66	ZFY26_HUMAN Zinc finger FYVE domain-containing protein 26 OS=Homo sapiens OX=9606 GN=ZFYVE26 PE=1 SV=3	R	NA	NA	C#GQDINPQR	NA	NA	2	NA	NA	0.102574	1
P30153	512	PPP2R1A	PPP2R1A_C512	2AAA_HUMAN Serine/threonine-protein phosphatase 2A 65 kDa regulatory subunit A alpha isoform OS=Homo sapiens OX=9606 GN=PPP2R1A PE=1 SV=4	V	NA	NA	C#GQDITTK	NA	NA	1	NA	NA	0.0317364	1
Q9H3H5	42	DPAGT1	DPAGT1_C42	GPT_HUMAN UDP-N-acetylglucosamine--dolichyl-phosphate N-acetylglucosaminephosphotransferase OS=Homo sapiens OX=9606 GN=DPAGT1 PE=1 SV=2	L	NA	NA	C#GQDLNK	NA	NA	1	NA	NA	0.0629444	1
Q9UGI8	46	TES	TES_C46	TES_HUMAN Testin OS=Homo sapiens OX=9606 GN=TES PE=1 SV=1	K	NA	NA	C#GQEEHDVLLSNEEDRK C#GQEEHDVLLSNEEDR	NA	NA	3	NA	NA	0.040639	1
P30154	524	PPP2R1B	PPP2R1B_C524	2AAB_HUMAN Serine/threonine-protein phosphatase 2A 65 kDa regulatory subunit A beta isoform OS=Homo sapiens OX=9606 GN=PPP2R1B PE=1 SV=3	A	NA	NA	C#GQEITTK	NA	NA	1	NA	NA	0.049702	1
Q96TC7	329	RMDN3	RMDN3_C329	RMD3_HUMAN Regulator of microtubule dynamics protein 3 OS=Homo sapiens OX=9606 GN=RMDN3 PE=1 SV=2	L	NA	NA	C#GQLAEHESIQR	NA	NA	1	NA	NA	0.00588732	1
Q4KMG0	1168	CDON	CDON_C1168	CDON_HUMAN Cell adhesion molecule-related/down-regulated by oncogenes OS=Homo sapiens OX=9606 GN=CDON PE=1 SV=2	D	NA	NA	C#GQLPEESVK	NA	NA	1	NA	NA	0.38058	1
Q96N21	352	TEPSIN	TEPSIN_C352	AP4AT_HUMAN AP-4 complex accessory subunit Tepsin OS=Homo sapiens OX=9606 GN=TEPSIN PE=1 SV=1	S	NA	NA	C#GQLSPAR	NA	NA	1	NA	NA	0.234144	1
Q8N3R9	490	MPP5	MPP5_C490	MPP5_HUMAN MAGUK p55 subfamily member 5 OS=Homo sapiens OX=9606 GN=MPP5 PE=1 SV=3	N	NA	NA	C#GQNELR	NA	NA	1	NA	NA	0.0817886	1
Q14686	868	NCOA6	NCOA6_C868	NCOA6_HUMAN Nuclear receptor coactivator 6 OS=Homo sapiens OX=9606 GN=NCOA6 PE=1 SV=3	S	NA	NA	C#GQNPGFPVNK	NA	NA	1	NA	NA	0.0159462	1
Q9H939	65	PSTPIP2	PSTPIP2_C65	PPIP2_HUMAN Proline-serine-threonine phosphatase-interacting protein 2 OS=Homo sapiens OX=9606 GN=PSTPIP2 PE=1 SV=4	P	NA	NA	C#GQSEINTLK	NA	NA	1	NA	NA	0.0157855	1
O14964	75	HGS	HGS_C75	HGS_HUMAN Hepatocyte growth factor-regulated tyrosine kinase substrate OS=Homo sapiens OX=9606 GN=HGS PE=1 SV=1	N	NA	NA	C#GQTVHDEVANK	NA	NA	1	NA	NA	0.0177401	1
Q02543	64	RPL18A	RPL18A_C64	RL18A_HUMAN 60S ribosomal protein L18a OS=Homo sapiens OX=9606 GN=RPL18A PE=1 SV=2	Y	NA	NA	C#GQVFEK	NA	NA	1	NA	NA	0.247474	1
P26358	356	DNMT1	DNMT1_C356	DNMT1_HUMAN DNA (cytosine-5)-methyltransferase 1 OS=Homo sapiens OX=9606 GN=DNMT1 PE=1 SV=2	Q	NA	NA	C#GQYLDDPDLK	NA	NA	1	NA	NA	0.00453123	1
P43378	412	PTPN9	PTPN9_C412	PTN9_HUMAN Tyrosine-protein phosphatase non-receptor type 9 OS=Homo sapiens OX=9606 GN=PTPN9 PE=1 SV=1	K	NA	NA	C#GQYWPLEK	NA	NA	1	NA	NA	0.254877	1
P15924	1280	DSP	DSP_C1280	DESP_HUMAN Desmoplakin OS=Homo sapiens OX=9606 GN=DSP PE=1 SV=3	A	NA	NA	C#GSEIMQK	NA	NA	1	NA	NA	0.168526	1
Q99707	1153	MTR	MTR_C1153	METH_HUMAN Methionine synthase OS=Homo sapiens OX=9606 GN=MTR PE=1 SV=2	Y	NA	NA	C#GSEQLDVADLR	NA	NA	1	NA	NA	0.000945444	1
Q7L2E3	1183	DHX30	DHX30_C1183	DHX30_HUMAN ATP-dependent RNA helicase DHX30 OS=Homo sapiens OX=9606 GN=DHX30 PE=1 SV=1	P	NA	NA	C#GSFDVR	NA	NA	1	NA	NA	0.246864	1
O00411	94	POLRMT	POLRMT_C94	RPOM_HUMAN DNA-directed RNA polymerase, mitochondrial OS=Homo sapiens OX=9606 GN=POLRMT PE=1 SV=2	E	NA	NA	C#GSGDGSLQPPR	NA	NA	1	NA	NA	0.263785	1
Q9H2U1	284	DHX36	DHX36_C284	DHX36_HUMAN ATP-dependent DNA/RNA helicase DHX36 OS=Homo sapiens OX=9606 GN=DHX36 PE=1 SV=2	S	NA	NA	C#GSGNSTGYQIR	NA	NA	1	NA	NA	0.191683	1
Q07021	71	C1QBP	C1QBP_C71	C1QBP_HUMAN Complement component 1 Q subcomponent-binding protein, mitochondrial OS=Homo sapiens OX=9606 GN=C1QBP PE=1 SV=1	G	NA	NA	C#GSLHTDGDK	NA	NA	1	NA	NA	0.0907386	1
Q7Z3T8	385	ZFYVE16	ZFYVE16_C385	ZFY16_HUMAN Zinc finger FYVE domain-containing protein 16 OS=Homo sapiens OX=9606 GN=ZFYVE16 PE=1 SV=3	M	NA	NA	C#GSLIESK	NA	NA	1	NA	NA	0.229021	1
P21953	177	BCKDHB	BCKDHB_C177	ODBB_HUMAN 2-oxoisovalerate dehydrogenase subunit beta, mitochondrial OS=Homo sapiens OX=9606 GN=BCKDHB PE=1 SV=2	N	NA	NA	C#GSLTIR	NA	NA	1	NA	NA	0.116705	1
Q7KZI7	210	MARK2	MARK2_C210	MARK2_HUMAN Serine/threonine-protein kinase MARK2 OS=Homo sapiens OX=9606 GN=MARK2 PE=1 SV=2	F	NA	NA	C#GSPPYAAPELFQGK	NA	NA	1	NA	NA	0.000353205	1
P11413	446	G6PD	G6PD_C446	G6PD_HUMAN Glucose-6-phosphate 1-dehydrogenase OS=Homo sapiens OX=9606 GN=G6PD PE=1 SV=4	F	NA	NA	C#GSQMHFVR	NA	NA	1	NA	NA	0.0483652	1
Q7Z4V5	631	HDGFL2	HDGFL2_C631	HDGR2_HUMAN Hepatoma-derived growth factor-related protein 2 OS=Homo sapiens OX=9606 GN=HDGFL2 PE=1 SV=1	R	NA	NA	C#GSSEDLHDSVR	NA	NA	2	NA	NA	0.0147524	1
P27540	269	ARNT	ARNT_C269	ARNT_HUMAN Aryl hydrocarbon receptor nuclear translocator OS=Homo sapiens OX=9606 GN=ARNT PE=1 SV=1	R	NA	NA	C#GSSSVDPVSVNR	NA	NA	1	NA	NA	0.0216454	1
Q8N567	160	ZCCHC9	ZCCHC9_C160	ZCHC9_HUMAN Zinc finger CCHC domain-containing protein 9 OS=Homo sapiens OX=9606 GN=ZCCHC9 PE=1 SV=2	R	NA	NA	C#GSTEHEITK	NA	NA	1	NA	NA	0.0505558	1
Q9H267	259	VPS33B	VPS33B_C259	VP33B_HUMAN Vacuolar protein sorting-associated protein 33B OS=Homo sapiens OX=9606 GN=VPS33B PE=1 SV=2	K	NA	NA	C#GSVDFGPEVTSSDK	NA	NA	1	NA	NA	0.071679	1
Q96SN8	1148	CDK5RAP2	CDK5RAP2_C1148	CK5P2_HUMAN CDK5 regulatory subunit-associated protein 2 OS=Homo sapiens OX=9606 GN=CDK5RAP2 PE=1 SV=5	L	NA	NA	C#GTEGAQDGLSKPK	NA	NA	2	NA	NA	0.0058691	1
P82912	112	MRPS11	MRPS11_C112	RT11_HUMAN 28S ribosomal protein S11, mitochondrial OS=Homo sapiens OX=9606 GN=MRPS11 PE=1 SV=2	S	NA	NA	C#GTEGFR	NA	NA	1	NA	NA	0.0941376	1
Q9P1U1	12	ACTR3B	ACTR3B_C12	ARP3B_HUMAN Actin-related protein 3B OS=Homo sapiens OX=9606 GN=ACTR3B PE=2 SV=1	D	NA	NA	C#GTGYTK	NA	NA	1	NA	NA	0.0736826	1
P60891	226	PRPS1	PRPS1_C226	PRPS1_HUMAN Ribose-phosphate pyrophosphokinase 1 OS=Homo sapiens OX=9606 GN=PRPS1 PE=1 SV=2	T	NA	NA	C#GTICHAADK	NA	NA	2	NA	NA	0.0969332	1
P09936	90	UCHL1	UCHL1_C90	UCHL1_HUMAN Ubiquitin carboxyl-terminal hydrolase isozyme L1 OS=Homo sapiens OX=9606 GN=UCHL1 PE=1 SV=2	S	NA	NA	C#GTIGLIHAVANNQDK C#GTIGLIHAV C#GTIGLIHAVAN C#GTIGLIHA C#GTIGLIH	NA	NA	7	NA	NA	0.0645299	1
O60232	56	ZNRD2	ZNRD2_C56	ZNRD2_HUMAN Protein ZNRD2 OS=Homo sapiens OX=9606 GN=ZNRD2 PE=1 SV=1	D	NA	NA	C#GTILLQDK	NA	NA	1	NA	NA	0.0623578	1
Q86XN7	139	PROSER1	PROSER1_C139	PRSR1_HUMAN Proline and serine-rich protein 1 OS=Homo sapiens OX=9606 GN=PROSER1 PE=1 SV=2	S	NA	NA	C#GTIPGNPYPK	NA	NA	1	NA	NA	0.330527	1
P62495	97	ETF1	ETF1_C97	ERF1_HUMAN Eukaryotic peptide chain release factor subunit 1 OS=Homo sapiens OX=9606 GN=ETF1 PE=1 SV=3	Y	NA	NA	C#GTIVTEEGK	NA	NA	2	NA	NA	0.0359557	1
Q96HA1	217	POM121	POM121_C217	P121A_HUMAN Nuclear envelope pore membrane protein POM 121 OS=Homo sapiens OX=9606 GN=POM121 PE=1 SV=2	D	NA	NA	C#GTLPNR	NA	NA	1	NA	NA	0.286182	1
Q9NV70	566	EXOC1	EXOC1_C566	EXOC1_HUMAN Exocyst complex component 1 OS=Homo sapiens OX=9606 GN=EXOC1 PE=1 SV=4	N	NA	NA	C#GTPLPVSSEK	NA	NA	1	NA	NA	0.0246726	1
Q9H9A6	23	LRRC40	LRRC40_C23	LRC40_HUMAN Leucine-rich repeat-containing protein 40 OS=Homo sapiens OX=9606 GN=LRRC40 PE=1 SV=1	D	NA	NA	C#GTSVPQGLLK	NA	NA	1	NA	NA	0.0692208	1
Q06210	392	GFPT1	GFPT1_C392	GFPT1_HUMAN Glutamine--fructose-6-phosphate aminotransferase [isomerizing] 1 OS=Homo sapiens OX=9606 GN=GFPT1 PE=1 SV=3	A	NA	NA	C#GTSYHAGVATR	NA	NA	1	NA	NA	0.142796	1
Q99460	378	PSMD1	PSMD1_C378	PSMD1_HUMAN 26S proteasome non-ATPase regulatory subunit 1 OS=Homo sapiens OX=9606 GN=PSMD1 PE=1 SV=2	H	NA	NA	C#GTTSDQFLR	NA	NA	1	NA	NA	0.00546979	1
P51812	229	RPS6KA3	RPS6KA3_C229	KS6A3_HUMAN Ribosomal protein S6 kinase alpha-3 OS=Homo sapiens OX=9606 GN=RPS6KA3 PE=1 SV=1	F	NA	NA	C#GTVEYMAPEVVNR	NA	NA	1	NA	NA	5.76e-05	1
P32121	141	ARRB2	ARRB2_C141	ARRB2_HUMAN Beta-arrestin-2 OS=Homo sapiens OX=9606 GN=ARRB2 PE=1 SV=2	A	NA	NA	C#GVDFEIR	NA	NA	1	NA	NA	0.0892124	1
Q9BX95	27	SGPP1	SGPP1_C27	SGPP1_HUMAN Sphingosine-1-phosphate phosphatase 1 OS=Homo sapiens OX=9606 GN=SGPP1 PE=1 SV=2	L	NA	NA	C#GVEAPPR	NA	NA	1	NA	NA	0.0581851	1
P27708	484	CAD	CAD_C484	PYR1_HUMAN CAD protein OS=Homo sapiens OX=9606 GN=CAD PE=1 SV=3	N	NA	NA	C#GVELTK	NA	NA	1	NA	NA	0.111171	1
P22830	360	FECH	FECH_C360	HEMH_HUMAN Ferrochelatase, mitochondrial OS=Homo sapiens OX=9606 GN=FECH PE=1 SV=2	E	NA	NA	C#GVENIR	NA	NA	1	NA	NA	0.194445	1
P08240	424	SRPRA	SRPRA_C424	SRPRA_HUMAN Signal recognition particle receptor subunit alpha OS=Homo sapiens OX=9606 GN=SRPRA PE=1 SV=2	F	NA	NA	C#GVNGVGK	NA	NA	2	NA	NA	0.204181	1
Q01433	230	AMPD2	AMPD2_C230	AMPD2_HUMAN AMP deaminase 2 OS=Homo sapiens OX=9606 GN=AMPD2 PE=1 SV=2	K	NA	NA	C#GVPFTDLLDAAK	NA	NA	1	NA	NA	0.0505706	1
Q9H9V9	143	JMJD4	JMJD4_C143	JMJD4_HUMAN 2-oxoglutarate and iron-dependent oxygenase JMJD4 OS=Homo sapiens OX=9606 GN=JMJD4 PE=1 SV=2	N	NA	NA	C#GVQEYNSNPK	NA	NA	1	NA	NA	0.0025514	1
Q7Z7K6	219	CENPV	CENPV_C219	CENPV_HUMAN Centromere protein V OS=Homo sapiens OX=9606 GN=CENPV PE=1 SV=1	R	NA	NA	C#GVQSFYTPR	NA	NA	1	NA	NA	0.0171193	1
P42356	1812	PI4KA	PI4KA_C1812	PI4KA_HUMAN Phosphatidylinositol 4-kinase alpha OS=Homo sapiens OX=9606 GN=PI4KA PE=1 SV=4	R	NA	NA	C#GVSELEK	NA	NA	1	NA	NA	0.161362	1
Q9H0C8	301	ILKAP	ILKAP_C301	ILKAP_HUMAN Integrin-linked kinase-associated serine/threonine phosphatase 2C OS=Homo sapiens OX=9606 GN=ILKAP PE=1 SV=1	R	NA	NA	C#GVTSVPDIR	NA	NA	2	NA	NA	0.180118	1
P15056	173	BRAF	BRAF_C173	BRAF_HUMAN Serine/threonine-protein kinase B-raf OS=Homo sapiens OX=9606 GN=BRAF PE=1 SV=4	R	NA	NA	C#GVTVR	NA	NA	1	NA	NA	0.201306	1
P35611	525	ADD1	ADD1_C525	ADDA_HUMAN Alpha-adducin OS=Homo sapiens OX=9606 GN=ADD1 PE=1 SV=2	L	NA	NA	C#GVVMDR	NA	NA	2	NA	NA	0.193662	1
Q13617	465	CUL2	CUL2_C465	CUL2_HUMAN Cullin-2 OS=Homo sapiens OX=9606 GN=CUL2 PE=1 SV=2	A	NA	NA	C#GYEFTSK	NA	NA	1	NA	NA	0.200802	1
P61927	37	RPL37	RPL37_C37	RL37_HUMAN 60S ribosomal protein L37 OS=Homo sapiens OX=9606 GN=RPL37 PE=1 SV=2	K	NA	NA	C#GYPAK	NA	NA	1	NA	NA	0.149854	1
Q7L5Y9	136	MAEA	MAEA_C136	MAEA_HUMAN E3 ubiquitin-protein transferase MAEA OS=Homo sapiens OX=9606 GN=MAEA PE=1 SV=1	R	NA	NA	C#GYYNTAVK	NA	NA	1	NA	NA	0.054181	1
P60842	131	EIF4A1	EIF4A1_C131	IF4A1_HUMAN Eukaryotic initiation factor 4A-I OS=Homo sapiens OX=9606 GN=EIF4A1 PE=1 SV=1	S	NA	NA	C#HACIGGTNVR	NA	NA	1	NA	NA	0.0231222	1
Q4VC44	173	FLYWCH1	FLYWCH1_C173	FWCH1_HUMAN FLYWCH-type zinc finger-containing protein 1 OS=Homo sapiens OX=9606 GN=FLYWCH1 PE=1 SV=2	H	NA	NA	C#HAPDEQGLEAR	NA	NA	1	NA	NA	0.015206	1
Q9Y3I0	485	RTCB	RTCB_C485	RTCB_HUMAN tRNA-splicing ligase RtcB homolog OS=Homo sapiens OX=9606 GN=RTCB PE=1 SV=1	T	NA	NA	C#HDAGISK	NA	NA	1	NA	NA	0.336961	1
Q5VUA4	242	ZNF318	ZNF318_C242	ZN318_HUMAN Zinc finger protein 318 OS=Homo sapiens OX=9606 GN=ZNF318 PE=1 SV=2	S	NA	NA	C#HDELLR	NA	NA	2	NA	NA	0.0868382	1
Q8TC27	495	ADAM32	ADAM32_C495	ADA32_HUMAN Disintegrin and metalloproteinase domain-containing protein 32 OS=Homo sapiens OX=9606 GN=ADAM32 PE=1 SV=2	D	NA	NA	C#HDLDAR	NA	NA	1	NA	NA	0.406467	1
Q9NZ53	548	PODXL2	PODXL2_C548	PDXL2_HUMAN Podocalyxin-like protein 2 OS=Homo sapiens OX=9606 GN=PODXL2 PE=1 SV=1	G	NA	NA	C#HDNPTLDVA	NA	NA	1	NA	NA	0.174181	1
Q92499	139	DDX1	DDX1_C139	DDX1_HUMAN ATP-dependent RNA helicase DDX1 OS=Homo sapiens OX=9606 GN=DDX1 PE=1 SV=2	S	NA	NA	C#HDQGLCR	NA	NA	2	NA	NA	0.208897	1
P31949	91	S100A11	S100A11_C91	S10AB_HUMAN Protein S100-A11 OS=Homo sapiens OX=9606 GN=S100A11 PE=1 SV=2	A	NA	NA	C#HDSFLK	NA	NA	3	NA	NA	0.0937401	1
P30279	5	CCND2	CCND2_C5	CCND2_HUMAN G1/S-specific cyclin-D2 OS=Homo sapiens OX=9606 GN=CCND2 PE=1 SV=1	L	NA	NA	C#HEVDPVR	NA	NA	2	NA	NA	0.189605	1
Q14168	256	MPP2	MPP2_C256	MPP2_HUMAN MAGUK p55 subfamily member 2 OS=Homo sapiens OX=9606 GN=MPP2 PE=1 SV=3	K	NA	NA	C#HFDYDPAR	NA	NA	1	NA	NA	0.157957	1
P47974	212	ZFP36L2	ZFP36L2_C212	TISD_HUMAN mRNA decay activator protein ZFP36L2 OS=Homo sapiens OX=9606 GN=ZFP36L2 PE=1 SV=3	R	NA	NA	C#HFIHNADER	NA	NA	2	NA	NA	0.176882	1
Q13162	51	PRDX4	PRDX4_C51	PRDX4_HUMAN Peroxiredoxin-4 OS=Homo sapiens OX=9606 GN=PRDX4 PE=1 SV=1	E	NA	NA	C#HFYAGGQ	NA	NA	1	NA	NA	0.101966	1
P36873	172	PPP1CC	PPP1CC_C172	PP1G_HUMAN Serine/threonine-protein phosphatase PP1-gamma catalytic subunit OS=Homo sapiens OX=9606 GN=PPP1CC PE=1 SV=1	C	NA	NA	C#HGGLSPDLQSM	NA	NA	1	NA	NA	0.0181587	1
Q16531	1008	DDB1	DDB1_C1008	DDB1_HUMAN DNA damage-binding protein 1 OS=Homo sapiens OX=9606 GN=DDB1 PE=1 SV=1	F	NA	NA	C#HGSLVMQ	NA	NA	1	NA	NA	0.0452728	1
P50851	1228	LRBA	LRBA_C1228	LRBA_HUMAN Lipopolysaccharide-responsive and beige-like anchor protein OS=Homo sapiens OX=9606 GN=LRBA PE=1 SV=4	D	NA	NA	C#HGSVSEASSEQK	NA	NA	1	NA	NA	0.0513132	1
Q9Y3Z3	320	SAMHD1	SAMHD1_C320	SAMH1_HUMAN Deoxynucleoside triphosphate triphosphohydrolase SAMHD1 OS=Homo sapiens OX=9606 GN=SAMHD1 PE=1 SV=2	D	NA	NA	C#HHLGIQ	NA	NA	1	NA	NA	0.268317	1
Q9UHI6	181	DDX20	DDX20_C181	DDX20_HUMAN Probable ATP-dependent RNA helicase DDX20 OS=Homo sapiens OX=9606 GN=DDX20 PE=1 SV=2	K	NA	NA	C#HIAVGSPGR	NA	NA	2	NA	NA	0.00904576	1
Q5JUR7	113	TEX30	TEX30_C113	TEX30_HUMAN Testis-expressed protein 30 OS=Homo sapiens OX=9606 GN=TEX30 PE=2 SV=1	M	NA	NA	C#HIEPDDGDDFVR	NA	NA	1	NA	NA	0.0109999	1
Q7Z3K3	547	POGZ	POGZ_C547	POGZ_HUMAN Pogo transposable element with ZNF domain OS=Homo sapiens OX=9606 GN=POGZ PE=1 SV=2	Q	NA	NA	C#HLENVHSPYEST C#HLENVHSPYESTTK	NA	NA	3	NA	NA	0.0128744	1
P15735	176	PHKG2	PHKG2_C176	PHKG2_HUMAN Phosphorylase b kinase gamma catalytic chain, liver/testis isoform OS=Homo sapiens OX=9606 GN=PHKG2 PE=1 SV=1	S	NA	NA	C#HLEPGEK	NA	NA	1	NA	NA	0.170956	1
O94804	888	STK10	STK10_C888	STK10_HUMAN Serine/threonine-protein kinase 10 OS=Homo sapiens OX=9606 GN=STK10 PE=1 SV=1	K	NA	NA	C#HLLVEHETQK	NA	NA	4	NA	NA	0.0117778	1
P63010	857	AP2B1	AP2B1_C857	AP2B1_HUMAN AP-2 complex subunit beta OS=Homo sapiens OX=9606 GN=AP2B1 PE=1 SV=1	E	NA	NA	C#HLNADTVSSK	NA	NA	1	NA	NA	0.00863525	1
Q13907	39	IDI1	IDI1_C39	IDI1_HUMAN Isopentenyl-diphosphate Delta-isomerase 1 OS=Homo sapiens OX=9606 GN=IDI1 PE=1 SV=2	N	NA	NA	C#HLNENIEK	NA	NA	1	NA	NA	0.242625	1
Q9NX24	92	NHP2	NHP2_C92	NHP2_HUMAN H/ACA ribonucleoprotein complex subunit 2 OS=Homo sapiens OX=9606 GN=NHP2 PE=1 SV=1	Y	NA	NA	C#HLPVMCEDR	NA	NA	1	NA	NA	0.0229426	1
Q15750	24	TAB1	TAB1_C24	TAB1_HUMAN TGF-beta-activated kinase 1 and MAP3K7-binding protein 1 OS=Homo sapiens OX=9606 GN=TAB1 PE=1 SV=1	L	NA	NA	C#HLSGVGSAS	NA	NA	1	NA	NA	0.0448339	1
Q68E01	740	INTS3	INTS3_C740	INT3_HUMAN Integrator complex subunit 3 OS=Homo sapiens OX=9606 GN=INTS3 PE=1 SV=1	L	NA	NA	C#HLTPSIY	NA	NA	1	NA	NA	0.389283	1
Q9UBB6	469	NCDN	NCDN_C469	NCDN_HUMAN Neurochondrin OS=Homo sapiens OX=9606 GN=NCDN PE=1 SV=1	W	NA	NA	C#HLTVEDGPR	NA	NA	1	NA	NA	0.0367665	1
Q9UGI8	364	TES	TES_C364	TES_HUMAN Testin OS=Homo sapiens OX=9606 GN=TES PE=1 SV=1	G	NA	NA	C#HNAIDPEVQR	NA	NA	2	NA	NA	0.0886529	1
Q96BR5	111	COA7	COA7_C111	COA7_HUMAN Cytochrome c oxidase assembly factor 7 OS=Homo sapiens OX=9606 GN=COA7 PE=1 SV=2	A	NA	NA	C#HNVGLL	NA	NA	1	NA	NA	0.258542	1
P19447	180	ERCC3	ERCC3_C180	ERCC3_HUMAN General transcription and DNA repair factor IIH helicase subunit XPB OS=Homo sapiens OX=9606 GN=ERCC3 PE=1 SV=1	S	NA	NA	C#HPDVIQH C#HPDVIQHL	NA	NA	2	NA	NA	0.149549	1
Q12923	324	PTPN13	PTPN13_C324	PTN13_HUMAN Tyrosine-protein phosphatase non-receptor type 13 OS=Homo sapiens OX=9606 GN=PTPN13 PE=1 SV=2	R	NA	NA	C#HPEAVTVR	NA	NA	2	NA	NA	0.0353892	1
P61421	129	ATP6V0D1	ATP6V0D1_C129	VA0D1_HUMAN V-type proton ATPase subunit d 1 OS=Homo sapiens OX=9606 GN=ATP6V0D1 PE=1 SV=1	K	NA	NA	C#HPLGSFEQM C#HPLGSF	NA	NA	2	NA	NA	0.0998081	1
Q9HCK8	1902	CHD8	CHD8_C1902	CHD8_HUMAN Chromodomain-helicase-DNA-binding protein 8 OS=Homo sapiens OX=9606 GN=CHD8 PE=1 SV=5	L	NA	NA	C#HPLLEDR	NA	NA	1	NA	NA	0.29961	1
Q5VWN6	1031	TASOR2	TASOR2_C1031	TASO2_HUMAN Protein TASOR 2 OS=Homo sapiens OX=9606 GN=TASOR2 PE=1 SV=1	E	NA	NA	C#HPSLER	NA	NA	1	NA	NA	0.352351	1
Q8WUD6	386	CHPT1	CHPT1_C386	CHPT1_HUMAN Cholinephosphotransferase 1 OS=Homo sapiens OX=9606 GN=CHPT1 PE=1 SV=1	A	NA	NA	C#HQAPEQVQVL	NA	NA	1	NA	NA	0.0190482	1
Q12968	120	NFATC3	NFATC3_C120	NFAC3_HUMAN Nuclear factor of activated T-cells, cytoplasmic 3 OS=Homo sapiens OX=9606 GN=NFATC3 PE=1 SV=1	N	NA	NA	C#HQELDAHEDDLQINDPER	NA	NA	1	NA	NA	0.139692	1
Q9UBT7	667	CTNNAL1	CTNNAL1_C667	CTNL1_HUMAN Alpha-catulin OS=Homo sapiens OX=9606 GN=CTNNAL1 PE=1 SV=2	L	NA	NA	C#HQLQTVTK	NA	NA	2	NA	NA	0.0275112	1
Q92783	336	STAM	STAM_C336	STAM1_HUMAN Signal transducing adapter molecule 1 OS=Homo sapiens OX=9606 GN=STAM PE=1 SV=3	M	NA	NA	C#HQMGPLIDEK C#HQMGPL	NA	NA	3	NA	NA	0.00187485	1
P18074	134	ERCC2	ERCC2_C134	ERCC2_HUMAN General transcription and DNA repair factor IIH helicase subunit XPD OS=Homo sapiens OX=9606 GN=ERCC2 PE=1 SV=1	K	NA	NA	C#HSLTAS	NA	NA	1	NA	NA	0.335257	1
Q14145	273	KEAP1	KEAP1_C273	KEAP1_HUMAN Kelch-like ECH-associated protein 1 OS=Homo sapiens OX=9606 GN=KEAP1 PE=1 SV=2	R	NA	NA	C#HSLTPN	NA	NA	1	NA	NA	0.167627	1
O15091	151	PRORP	PRORP_C151	MRPP3_HUMAN Mitochondrial ribonuclease P catalytic subunit OS=Homo sapiens OX=9606 GN=PRORP PE=1 SV=2	G	NA	NA	C#HSSIDVAK	NA	NA	1	NA	NA	0.0479253	1
Q9UPP5	559	KIAA1107	KIAA1107_C559	K1107_HUMAN AP2-interacting clathrin-endocytosis protein OS=Homo sapiens OX=9606 GN=KIAA1107 PE=1 SV=3	C	NA	NA	C#HSVGSDNVNSK	NA	NA	2	NA	NA	0.0141984	1
O75879	505	GATB	GATB_C505	GATB_HUMAN Glutamyl-tRNA(Gln) amidotransferase subunit B, mitochondrial OS=Homo sapiens OX=9606 GN=GATB PE=1 SV=1	L	NA	NA	C#HSVMEAHPQ	NA	NA	1	NA	NA	0.17112	1
Q9Y4C2	576	TCAF1	TCAF1_C576	TCAF1_HUMAN TRPM8 channel-associated factor 1 OS=Homo sapiens OX=9606 GN=TCAF1 PE=1 SV=3	G	NA	NA	C#HTDDLTR	NA	NA	1	NA	NA	0.0563938	1
O15027	504	SEC16A	SEC16A_C504	SC16A_HUMAN Protein transport protein Sec16A OS=Homo sapiens OX=9606 GN=SEC16A PE=1 SV=4	V	NA	NA	C#HTGAPDATLH	NA	NA	2	NA	NA	0.198141	1
Q9NVX0	89	HAUS2	HAUS2_C89	HAUS2_HUMAN HAUS augmin-like complex subunit 2 OS=Homo sapiens OX=9606 GN=HAUS2 PE=1 SV=1	K	NA	NA	C#HTLQSM	NA	NA	1	NA	NA	0.29682	1
P52701	765	MSH6	MSH6_C765	MSH6_HUMAN DNA mismatch repair protein Msh6 OS=Homo sapiens OX=9606 GN=MSH6 PE=1 SV=2	T	NA	NA	C#HTPFGK	NA	NA	1	NA	NA	0.0383163	1
Q9BSJ8	635	ESYT1	ESYT1_C635	ESYT1_HUMAN Extended synaptotagmin-1 OS=Homo sapiens OX=9606 GN=ESYT1 PE=1 SV=1	P	NA	NA	C#HTTPDSQFGTEHVLR	NA	NA	1	NA	NA	0.209411	1
Q6NXE6	484	ARMC6	ARMC6_C484	ARMC6_HUMAN Armadillo repeat-containing protein 6 OS=Homo sapiens OX=9606 GN=ARMC6 PE=1 SV=2	G	NA	NA	C#HVELR	NA	NA	2	NA	NA	0.116748	1
P17812	234	CTPS1	CTPS1_C234	PYRG1_HUMAN CTP synthase 1 OS=Homo sapiens OX=9606 GN=CTPS1 PE=1 SV=2	F	NA	NA	C#HVEPEQVIC	NA	NA	1	NA	NA	0.0178969	1
P10316	283	HLA-A	HLA-A_C283	1A69_HUMAN HLA class I histocompatibility antigen, A-69 alpha chain OS=Homo sapiens OX=9606 GN=HLA-A PE=1 SV=2	T	NA	NA	C#HVQHEGLPK	NA	NA	2	NA	NA	0.0866157	1
Q9Y4X5	347	ARIH1	ARIH1_C347	ARI1_HUMAN E3 ubiquitin-protein ligase ARIH1 OS=Homo sapiens OX=9606 GN=ARIH1 PE=1 SV=2	K	NA	NA	C#HVTIEK	NA	NA	1	NA	NA	0.0455519	1
P13797	209	PLS3	PLS3_C209	PLST_HUMAN Plastin-3 OS=Homo sapiens OX=9606 GN=PLS3 PE=1 SV=4	G	NA	NA	C#HVVNIGAEDLR	NA	NA	4	NA	NA	0.109308	1
P46060	82	RANGAP1	RANGAP1_C82	RAGP1_HUMAN Ran GTPase-activating protein 1 OS=Homo sapiens OX=9606 GN=RANGAP1 PE=1 SV=1	R	NA	NA	C#HWSDMFTGR	NA	NA	2	NA	NA	0.0536136	1
Q99575	358	POP1	POP1_C358	POP1_HUMAN Ribonucleases P/MRP protein subunit POP1 OS=Homo sapiens OX=9606 GN=POP1 PE=1 SV=2	V	NA	NA	C#IADPLPTPSQEK	NA	NA	1	NA	NA	0.0677719	1
P15924	2259	DSP	DSP_C2259	DESP_HUMAN Desmoplakin OS=Homo sapiens OX=9606 GN=DSP PE=1 SV=3	S	NA	NA	C#IAGIYNETTK	NA	NA	1	NA	NA	0.00956598	1
Q92922	761	SMARCC1	SMARCC1_C761	SMRC1_HUMAN SWI/SNF complex subunit SMARCC1 OS=Homo sapiens OX=9606 GN=SMARCC1 PE=1 SV=3	S	NA	NA	C#IAGTGPDEPEKLEGAEEEKMEADPDGQQPEK C#IAGTGPDEPEKLEGAEEEK C#IAGTGPDEPEKLEGAEEEKMEADPDGQQPEKA	NA	NA	4	NA	NA	0.0435622	1
O14936	684	CASK	CASK_C684	CSKP_HUMAN Peripheral plasma membrane protein CASK OS=Homo sapiens OX=9606 GN=CASK PE=1 SV=3	A	NA	NA	C#IAMEK	NA	NA	2	NA	NA	0.238031	1
Q9Y6I4	11	USP3	USP3_C11	UBP3_HUMAN Ubiquitin carboxyl-terminal hydrolase 3 OS=Homo sapiens OX=9606 GN=USP3 PE=1 SV=2	V	NA	NA	C#IAPDSAK	NA	NA	1	NA	NA	0.016434	1
A0A0B4J2D5	177	GATD3B	GATD3B_C177	GAL3B_HUMAN Glutamine amidotransferase-like class 1 domain-containing protein 3B, mitochondrial OS=Homo sapiens OX=9606 GN=GATD3B PE=1 SV=1	C	NA	NA	C#IAPVLAAK	NA	NA	1	NA	NA	0.00516902	1
P45974	471	USP5	USP5_C471	UBP5_HUMAN Ubiquitin carboxyl-terminal hydrolase 5 OS=Homo sapiens OX=9606 GN=USP5 PE=1 SV=2	K	NA	NA	C#IATEK	NA	NA	1	NA	NA	0.131718	1
Q96J01	134	THOC3	THOC3_C134	THOC3_HUMAN THO complex subunit 3 OS=Homo sapiens OX=9606 GN=THOC3 PE=1 SV=1	K	NA	NA	C#IATVNTK	NA	NA	1	NA	NA	0.0226269	1
O14617	39	AP3D1	AP3D1_C39	AP3D1_HUMAN AP-3 complex subunit delta-1 OS=Homo sapiens OX=9606 GN=AP3D1 PE=1 SV=1	Q	NA	NA	C#IDEIKQELK	NA	NA	1	NA	NA	0.0477068	1
P52888	175	THOP1	THOP1_C175	THOP1_HUMAN Thimet oligopeptidase OS=Homo sapiens OX=9606 GN=THOP1 PE=1 SV=2	L	NA	NA	C#IDFNK	NA	NA	2	NA	NA	0.25534	1
Q04726	623	TLE3	TLE3_C623	TLE3_HUMAN Transducin-like enhancer protein 3 OS=Homo sapiens OX=9606 GN=TLE3 PE=1 SV=2	S	NA	NA	C#IDISHDGTK	NA	NA	1	NA	NA	0.00679142	1
Q04727	624	TLE4	TLE4_C624	TLE4_HUMAN Transducin-like enhancer protein 4 OS=Homo sapiens OX=9606 GN=TLE4 PE=1 SV=3	S	NA	NA	C#IDISNDGTK	NA	NA	1	NA	NA	0.00654732	1
O94826	502	TOMM70	TOMM70_C502	TOM70_HUMAN Mitochondrial import receptor subunit TOM70 OS=Homo sapiens OX=9606 GN=TOMM70 PE=1 SV=1	K	NA	NA	C#IDLEPDNATTYVHK	NA	NA	2	NA	NA	0.017183	1
O43765	153	SGTA	SGTA_C153	SGTA_HUMAN Small glutamine-rich tetratricopeptide repeat-containing protein alpha OS=Homo sapiens OX=9606 GN=SGTA PE=1 SV=1	I	NA	NA	C#IDPAYSK	NA	NA	1	NA	NA	0.0284231	1
Q5T8P6	53	RBM26	RBM26_C53	RBM26_HUMAN RNA-binding protein 26 OS=Homo sapiens OX=9606 GN=RBM26 PE=1 SV=3	L	NA	NA	C#IDQLDVFLQK	NA	NA	1	NA	NA	0.19218	1
Q9Y4B4	533	RAD54L2	RAD54L2_C533	ARIP4_HUMAN Helicase ARIP4 OS=Homo sapiens OX=9606 GN=RAD54L2 PE=1 SV=4	Q	NA	NA	C#IDSTPQDVR	NA	NA	1	NA	NA	0.0230976	1
P15924	367	DSP	DSP_C367	DESP_HUMAN Desmoplakin OS=Homo sapiens OX=9606 GN=DSP PE=1 SV=3	K	NA	NA	C#IDVHLK	NA	NA	1	NA	NA	0.180322	1
O75094	171	SLIT3	SLIT3_C171	SLIT3_HUMAN Slit homolog 3 protein OS=Homo sapiens OX=9606 GN=SLIT3 PE=2 SV=3	S	NA	NA	C#IEDGAFR	NA	NA	1	NA	NA	0.332729	1
Q92990	36	GLMN	GLMN_C36	GLMN_HUMAN Glomulin OS=Homo sapiens OX=9606 GN=GLMN PE=1 SV=2	R	NA	NA	C#IEEGHTDQLLEIIQNEK	NA	NA	1	NA	NA	0.0113602	1
Q9BVA0	226	KATNB1	KATNB1_C226	KTNB1_HUMAN Katanin p80 WD40 repeat-containing subunit B1 OS=Homo sapiens OX=9606 GN=KATNB1 PE=1 SV=1	S	NA	NA	C#IEGEPGPVR	NA	NA	1	NA	NA	0.313704	1
Q96HA7	537	TONSL	TONSL_C537	TONSL_HUMAN Tonsoku-like protein OS=Homo sapiens OX=9606 GN=TONSL PE=1 SV=2	A	NA	NA	C#IEGQLR	NA	NA	1	NA	NA	0.235007	1
P42224	155	STAT1	STAT1_C155	STAT1_HUMAN Signal transducer and activator of transcription 1-alpha/beta OS=Homo sapiens OX=9606 GN=STAT1 PE=1 SV=2	M	NA	NA	C#IEHEIK	NA	NA	1	NA	NA	0.0568542	1
O94874	32	UFL1	UFL1_C32	UFL1_HUMAN E3 UFM1-protein ligase 1 OS=Homo sapiens OX=9606 GN=UFL1 PE=1 SV=2	N	NA	NA	C#IEIVNK	NA	NA	1	NA	NA	0.113514	1
Q53HC9	222	EIPR1	EIPR1_C222	EIPR1_HUMAN EARP and GARP complex-interacting protein 1 OS=Homo sapiens OX=9606 GN=EIPR1 PE=1 SV=2	Y	NA	NA	C#IENAHGQ	NA	NA	1	NA	NA	0.129925	1
Q8NE86	191	MCU	MCU_C191	MCU_HUMAN Calcium uniporter protein, mitochondrial OS=Homo sapiens OX=9606 GN=MCU PE=1 SV=1	L	NA	NA	C#IEQHQLNK	NA	NA	1	NA	NA	0.0585252	1
Q96FX7	209	TRMT61A	TRMT61A_C209	TRM61_HUMAN tRNA (adenine(58)-N(1))-methyltransferase catalytic subunit TRMT61A OS=Homo sapiens OX=9606 GN=TRMT61A PE=1 SV=1	P	NA	NA	C#IEQVQR	NA	NA	1	NA	NA	0.0324892	1
Q9ULT8	878	HECTD1	HECTD1_C878	HECD1_HUMAN E3 ubiquitin-protein ligase HECTD1 OS=Homo sapiens OX=9606 GN=HECTD1 PE=1 SV=3	Q	NA	NA	C#IESENTWR	NA	NA	1	NA	NA	0.120026	1
P24928	1245	POLR2A	POLR2A_C1245	RPB1_HUMAN DNA-directed RNA polymerase II subunit RPB1 OS=Homo sapiens OX=9606 GN=POLR2A PE=1 SV=2	N	NA	NA	C#IFNDDNAEK	NA	NA	1	NA	NA	0.0369379	1
O00541	361	PES1	PES1_C361	PESC_HUMAN Pescadillo homolog OS=Homo sapiens OX=9606 GN=PES1 PE=1 SV=1	L	NA	NA	C#IGATYDVTDSR	NA	NA	1	NA	NA	0.0107683	1
P39023	253	RPL3	RPL3_C253	RL3_HUMAN 60S ribosomal protein L3 OS=Homo sapiens OX=9606 GN=RPL3 PE=1 SV=2	A	NA	NA	C#IGAWHPAR	NA	NA	1	NA	NA	0.0498373	1
Q86VP6	1007	CAND1	CAND1_C1007	CAND1_HUMAN Cullin-associated NEDD8-dissociated protein 1 OS=Homo sapiens OX=9606 GN=CAND1 PE=1 SV=2	N	NA	NA	C#IGDFLK	NA	NA	1	NA	NA	0.0861127	1
Q16850	449	CYP51A1	CYP51A1_C449	CP51A_HUMAN Lanosterol 14-alpha demethylase OS=Homo sapiens OX=9606 GN=CYP51A1 PE=1 SV=3	R	NA	NA	C#IGENFAYVQIK	NA	NA	1	NA	NA	0.0186285	1
O00154	117	ACOT7	ACOT7_C117	BACH_HUMAN Cytosolic acyl coenzyme A thioester hydrolase OS=Homo sapiens OX=9606 GN=ACOT7 PE=1 SV=3	M	NA	NA	C#IGEVAHVS	NA	NA	1	NA	NA	0.0966879	1
P40763	251	STAT3	STAT3_C251	STAT3_HUMAN Signal transducer and activator of transcription 3 OS=Homo sapiens OX=9606 GN=STAT3 PE=1 SV=2	A	NA	NA	C#IGGPPNICLDR	NA	NA	1	NA	NA	0.192495	1
Q9HAV4	1157	XPO5	XPO5_C1157	XPO5_HUMAN Exportin-5 OS=Homo sapiens OX=9606 GN=XPO5 PE=1 SV=1	G	NA	NA	C#IGKPLGEQFR	NA	NA	1	NA	NA	0.178728	1
Q9UKT4	95	FBXO5	FBXO5_C95	FBX5_HUMAN F-box only protein 5 OS=Homo sapiens OX=9606 GN=FBXO5 PE=1 SV=1	S	NA	NA	C#IGSPIVSPR	NA	NA	1	NA	NA	0.371082	1
Q96ER3	25	SAAL1	SAAL1_C25	SAAL1_HUMAN Protein SAAL1 OS=Homo sapiens OX=9606 GN=SAAL1 PE=1 SV=2	D	NA	NA	C#IGSTVYSK	NA	NA	1	NA	NA	0.0272973	1
Q9NZZ3	20	CHMP5	CHMP5_C20	CHMP5_HUMAN Charged multivesicular body protein 5 OS=Homo sapiens OX=9606 GN=CHMP5 PE=1 SV=1	D	NA	NA	C#IGTVDSR	NA	NA	1	NA	NA	0.110061	1
Q8NCD3	604	HJURP	HJURP_C604	HJURP_HUMAN Holliday junction recognition protein OS=Homo sapiens OX=9606 GN=HJURP PE=1 SV=2	L	NA	NA	C#IGVSTDK	NA	NA	1	NA	NA	0.397859	1
P48735	418	IDH2	IDH2_C418	IDHP_HUMAN Isocitrate dehydrogenase [NADP], mitochondrial OS=Homo sapiens OX=9606 GN=IDH2 PE=1 SV=2	G	NA	NA	C#IHGLSNVK	NA	NA	2	NA	NA	0.0160485	1
P52306	350	RAP1GDS1	RAP1GDS1_C350	GDS1_HUMAN Rap1 GTPase-GDP dissociation stimulator 1 OS=Homo sapiens OX=9606 GN=RAP1GDS1 PE=1 SV=3	N	NA	NA	C#IHMVDNGIVEK	NA	NA	2	NA	NA	0.088344	1
Q6P1L8	57	MRPL14	MRPL14_C57	RM14_HUMAN 39S ribosomal protein L14, mitochondrial OS=Homo sapiens OX=9606 GN=MRPL14 PE=1 SV=1	R	NA	NA	C#IHVYK	NA	NA	1	NA	NA	0.398055	1
Q13347	160	EIF3I	EIF3I_C160	EIF3I_HUMAN Eukaryotic translation initiation factor 3 subunit I OS=Homo sapiens OX=9606 GN=EIF3I PE=1 SV=1	E	NA	NA	C#IIAGHESGELN C#IIAGHESGELNQY	NA	NA	2	NA	NA	0.0480053	1
Q9NTJ3	110	SMC4	SMC4_C110	SMC4_HUMAN Structural maintenance of chromosomes protein 4 OS=Homo sapiens OX=9606 GN=SMC4 PE=1 SV=2	S	NA	NA	C#IIGPNGSGK	NA	NA	1	NA	NA	0.213003	1
P55210	70	CASP7	CASP7_C70	CASP7_HUMAN Caspase-7 OS=Homo sapiens OX=9606 GN=CASP7 PE=1 SV=1	K	NA	NA	C#IIINNK	NA	NA	2	NA	NA	0.14758	1
Q7L1Q6	35	BZW1	BZW1_C35	BZW1_HUMAN Basic leucine zipper and W2 domain-containing protein 1 OS=Homo sapiens OX=9606 GN=BZW1 PE=1 SV=1	D	NA	NA	C#IIQGLTETGTDLEAVAK	NA	NA	1	NA	NA	0.0311647	1
Q01469	43	FABP5	FABP5_C43	FABP5_HUMAN Fatty acid-binding protein 5 OS=Homo sapiens OX=9606 GN=FABP5 PE=1 SV=3	D	NA	NA	C#IITCDGK	NA	NA	1	NA	NA	0.0714425	1
P36578	208	RPL4	RPL4_C208	RL4_HUMAN 60S ribosomal protein L4 OS=Homo sapiens OX=9606 GN=RPL4 PE=1 SV=5	P	NA	NA	C#IIYNEDNGIIK	NA	NA	1	NA	NA	0.00383055	1
P38935	395	IGHMBP2	IGHMBP2_C395	SMBP2_HUMAN DNA-binding protein SMUBP-2 OS=Homo sapiens OX=9606 GN=IGHMBP2 PE=1 SV=3	K	NA	NA	C#ILAGDHK	NA	NA	1	NA	NA	0.286874	1
O00411	472	POLRMT	POLRMT_C472	RPOM_HUMAN DNA-directed RNA polymerase, mitochondrial OS=Homo sapiens OX=9606 GN=POLRMT PE=1 SV=2	L	NA	NA	C#ILDER	NA	NA	1	NA	NA	0.288365	1
P57740	78	NUP107	NUP107_C78	NU107_HUMAN Nuclear pore complex protein Nup107 OS=Homo sapiens OX=9606 GN=NUP107 PE=1 SV=1	S	NA	NA	C#ILGTGGK	NA	NA	1	NA	NA	0.0469408	1
Q13907	21	IDI1	IDI1_C21	IDI1_HUMAN Isopentenyl-diphosphate Delta-isomerase 1 OS=Homo sapiens OX=9606 GN=IDI1 PE=1 SV=2	M	NA	NA	C#ILIDENDNK	NA	NA	1	NA	NA	0.19038	1
Q8IX01	970	SUGP2	SUGP2_C970	SUGP2_HUMAN SURP and G-patch domain-containing protein 2 OS=Homo sapiens OX=9606 GN=SUGP2 PE=1 SV=2	V	NA	NA	C#ILQEPK	NA	NA	1	NA	NA	0.0355126	1
O14617	574	AP3D1	AP3D1_C574	AP3D1_HUMAN AP-3 complex subunit delta-1 OS=Homo sapiens OX=9606 GN=AP3D1 PE=1 SV=1	S	NA	NA	C#ILQLVK	NA	NA	1	NA	NA	0.231892	1
Q15532	34	SS18	SS18_C34	SSXT_HUMAN Protein SSXT OS=Homo sapiens OX=9606 GN=SS18 PE=1 SV=3	Q	NA	NA	C#IMDSQNK	NA	NA	2	NA	NA	0.0743144	1
P14618	358	PKM	PKM_C358	KPYM_HUMAN Pyruvate kinase PKM OS=Homo sapiens OX=9606 GN=PKM PE=1 SV=4	D	NA	NA	C#IMLSGETAK	NA	NA	2	NA	NA	0.0438114	1
P50542	566	PEX5	PEX5_C566	PEX5_HUMAN Peroxisomal targeting signal 1 receptor OS=Homo sapiens OX=9606 GN=PEX5 PE=1 SV=3	S	NA	NA	C#INLGAHR	NA	NA	1	NA	NA	0.0606744	1
Q6PI48	371	DARS2	DARS2_C371	SYDM_HUMAN Aspartate--tRNA ligase, mitochondrial OS=Homo sapiens OX=9606 GN=DARS2 PE=1 SV=1	I	NA	NA	C#IPEGAK	NA	NA	1	NA	NA	0.180612	1
P55039	99	DRG2	DRG2_C99	DRG2_HUMAN Developmentally-regulated GTP-binding protein 2 OS=Homo sapiens OX=9606 GN=DRG2 PE=1 SV=1	T	NA	NA	C#IPGVIEYK	NA	NA	1	NA	NA	0.0666267	1
Q8IVT5	251	KSR1	KSR1_C251	KSR1_HUMAN Kinase suppressor of Ras 1 OS=Homo sapiens OX=9606 GN=KSR1 PE=1 SV=3	T	NA	NA	C#IPLHAS	NA	NA	1	NA	NA	0.296816	1
Q8WWK9	100	CKAP2	CKAP2_C100	CKAP2_HUMAN Cytoskeleton-associated protein 2 OS=Homo sapiens OX=9606 GN=CKAP2 PE=1 SV=1	H	NA	NA	C#IPLKPSNELTN C#IPLKPSNELTNS	NA	NA	2	NA	NA	0.246067	1
Q5T1M5	1031	FKBP15	FKBP15_C1031	FKB15_HUMAN FK506-binding protein 15 OS=Homo sapiens OX=9606 GN=FKBP15 PE=1 SV=2	S	NA	NA	C#IPSHR	NA	NA	1	NA	NA	0.252186	1
P46939	3117	UTRN	UTRN_C3117	UTRO_HUMAN Utrophin OS=Homo sapiens OX=9606 GN=UTRN PE=1 SV=2	Y	NA	NA	C#IPTTSGEDVR	NA	NA	1	NA	NA	0.150185	1
O15226	206	NKRF	NKRF_C206	NKRF_HUMAN NF-kappa-B-repressing factor OS=Homo sapiens OX=9606 GN=NKRF PE=1 SV=2	R	NA	NA	C#IQACK	NA	NA	1	NA	NA	0.385927	1
O00232	255	PSMD12	PSMD12_C255	PSD12_HUMAN 26S proteasome non-ATPase regulatory subunit 12 OS=Homo sapiens OX=9606 GN=PSMD12 PE=1 SV=3	P	NA	NA	C#IQAESEK	NA	NA	1	NA	NA	0.0195095	1
O75794	212	CDC123	CDC123_C212	CD123_HUMAN Cell division cycle protein 123 homolog OS=Homo sapiens OX=9606 GN=CDC123 PE=1 SV=1	R	NA	NA	C#IQDFFK	NA	NA	1	NA	NA	0.0667456	1
Q5THK1	446	PRR14L	PRR14L_C446	PR14L_HUMAN Protein PRR14L OS=Homo sapiens OX=9606 GN=PRR14L PE=1 SV=1	N	NA	NA	C#IQDSLHTGNSS	NA	NA	1	NA	NA	0.0945563	1
O43719	328	HTATSF1	HTATSF1_C328	HTSF1_HUMAN HIV Tat-specific factor 1 OS=Homo sapiens OX=9606 GN=HTATSF1 PE=1 SV=1	Y	NA	NA	C#IQTLDGR	NA	NA	1	NA	NA	0.133639	1
Q96S55	502	WRNIP1	WRNIP1_C502	WRIP1_HUMAN ATPase WRNIP1 OS=Homo sapiens OX=9606 GN=WRNIP1 PE=1 SV=2	N	NA	NA	C#ISALHK	NA	NA	2	NA	NA	0.219308	1
P07948	203	LYN	LYN_C203	LYN_HUMAN Tyrosine-protein kinase Lyn OS=Homo sapiens OX=9606 GN=LYN PE=1 SV=3	P	NA	NA	C#ISDMIK	NA	NA	1	NA	NA	0.195538	1
Q96JG6	218	VPS50	VPS50_C218	VPS50_HUMAN Syndetin OS=Homo sapiens OX=9606 GN=VPS50 PE=1 SV=3	S	NA	NA	C#ISELNSK	NA	NA	1	NA	NA	0.0358633	1
P43304	45	GPD2	GPD2_C45	GPDM_HUMAN Glycerol-3-phosphate dehydrogenase, mitochondrial OS=Homo sapiens OX=9606 GN=GPD2 PE=1 SV=3	D	NA	NA	C#ISEPVNR	NA	NA	1	NA	NA	0.36607	1
Q9UBK8	37	MTRR	MTRR_C37	MTRR_HUMAN Methionine synthase reductase OS=Homo sapiens OX=9606 GN=MTRR PE=1 SV=4	H	NA	NA	C#ISESDKYDLK	NA	NA	1	NA	NA	0.0152715	1
Q7Z408	1252	CSMD2	CSMD2_C1252	CSMD2_HUMAN CUB and sushi domain-containing protein 2 OS=Homo sapiens OX=9606 GN=CSMD2 PE=1 SV=2	L	NA	NA	C#ISGER	NA	NA	1	NA	NA	0.153022	1
Q9UHI6	338	DDX20	DDX20_C338	DDX20_HUMAN Probable ATP-dependent RNA helicase DDX20 OS=Homo sapiens OX=9606 GN=DDX20 PE=1 SV=2	E	NA	NA	C#ISGNMNQNQR	NA	NA	1	NA	NA	0.00919298	1
O14965	8	AURKA	AURKA_C8	AURKA_HUMAN Aurora kinase A OS=Homo sapiens OX=9606 GN=AURKA PE=1 SV=2	N	NA	NA	C#ISGPVK	NA	NA	1	NA	NA	0.0899104	1
Q96PY6	855	NEK1	NEK1_C855	NEK1_HUMAN Serine/threonine-protein kinase Nek1 OS=Homo sapiens OX=9606 GN=NEK1 PE=1 SV=2	Q	NA	NA	C#ISHEINPS	NA	NA	1	NA	NA	0.124894	1
O95757	38	HSPA4L	HSPA4L_C38	HS74L_HUMAN Heat shock 70 kDa protein 4L OS=Homo sapiens OX=9606 GN=HSPA4L PE=1 SV=3	A	NA	NA	C#ISLGSR	NA	NA	1	NA	NA	0.103734	1
Q9NV70	650	EXOC1	EXOC1_C650	EXOC1_HUMAN Exocyst complex component 1 OS=Homo sapiens OX=9606 GN=EXOC1 PE=1 SV=4	K	NA	NA	C#ISNQIR	NA	NA	1	NA	NA	0.148061	1
Q13573	250	SNW1	SNW1_C250	SNW1_HUMAN SNW domain-containing protein 1 OS=Homo sapiens OX=9606 GN=SNW1 PE=1 SV=1	P	NA	NA	C#ISNWK	NA	NA	1	NA	NA	0.372597	1
O95140	348	MFN2	MFN2_C348	MFN2_HUMAN Mitofusin-2 OS=Homo sapiens OX=9606 GN=MFN2 PE=1 SV=3	E	NA	NA	C#ISQSAVK	NA	NA	1	NA	NA	0.392137	1
Q9H4A6	84	GOLPH3	GOLPH3_C84	GOLP3_HUMAN Golgi phosphoprotein 3 OS=Homo sapiens OX=9606 GN=GOLPH3 PE=1 SV=1	D	NA	NA	C#ISSGLR	NA	NA	1	NA	NA	0.167585	1
Q14008	1113	CKAP5	CKAP5_C1113	CKAP5_HUMAN Cytoskeleton-associated protein 5 OS=Homo sapiens OX=9606 GN=CKAP5 PE=1 SV=3	D	NA	NA	C#ISSSTEPKPDPK	NA	NA	2	NA	NA	0.0525057	1
Q9NZI7	188	UBP1	UBP1_C188	UBIP1_HUMAN Upstream-binding protein 1 OS=Homo sapiens OX=9606 GN=UBP1 PE=1 SV=1	H	NA	NA	C#ISTEFTPR	NA	NA	1	NA	NA	0.254586	1
Q9P2I0	522	CPSF2	CPSF2_C522	CPSF2_HUMAN Cleavage and polyadenylation specificity factor subunit 2 OS=Homo sapiens OX=9606 GN=CPSF2 PE=1 SV=2	K	NA	NA	C#ISTTESIEIK	NA	NA	1	NA	NA	0.00514255	1
O43390	240	HNRNPR	HNRNPR_C240	HNRPR_HUMAN Heterogeneous nuclear ribonucleoprotein R OS=Homo sapiens OX=9606 GN=HNRNPR PE=1 SV=1	V	NA	NA	C#ISVANNR	NA	NA	1	NA	NA	0.0290054	1
Q8TAT6	341	NPLOC4	NPLOC4_C341	NPL4_HUMAN Nuclear protein localization protein 4 homolog OS=Homo sapiens OX=9606 GN=NPLOC4 PE=1 SV=3	E	NA	NA	C#ITAGDFQNK	NA	NA	1	NA	NA	0.143051	1
P49023	546	PXN	PXN_C546	PAXI_HUMAN Paxillin OS=Homo sapiens OX=9606 GN=PXN PE=1 SV=3	R	NA	NA	C#ITAMAK	NA	NA	1	NA	NA	0.0253918	1
P53597	142	SUCLG1	SUCLG1_C142	SUCA_HUMAN Succinate--CoA ligase [ADP/GDP-forming] subunit alpha, mitochondrial OS=Homo sapiens OX=9606 GN=SUCLG1 PE=1 SV=4	V	NA	NA	C#ITEGIPQQDMVR	NA	NA	1	NA	NA	0.0286337	1
A5YKK6	1615	CNOT1	CNOT1_C1615	CNOT1_HUMAN CCR4-NOT transcription complex subunit 1 OS=Homo sapiens OX=9606 GN=CNOT1 PE=1 SV=2	K	NA	NA	C#ITELEQHLH	NA	NA	1	NA	NA	0.2196	1
Q02880	237	TOP2B	TOP2B_C237	TOP2B_HUMAN DNA topoisomerase 2-beta OS=Homo sapiens OX=9606 GN=TOP2B PE=1 SV=3	T	NA	NA	C#ITFQPDLSK	NA	NA	1	NA	NA	0.00882572	1
Q6YHU6	926	THADA	THADA_C926	THADA_HUMAN Thyroid adenoma-associated protein OS=Homo sapiens OX=9606 GN=THADA PE=1 SV=1	H	NA	NA	C#ITGALQK	NA	NA	1	NA	NA	0.180961	1
Q08211	1099	DHX9	DHX9_C1099	DHX9_HUMAN ATP-dependent RNA helicase A OS=Homo sapiens OX=9606 GN=DHX9 PE=1 SV=4	A	NA	NA	C#ITGLR	NA	NA	1	NA	NA	0.169184	1
Q8NFC6	2570	BOD1L1	BOD1L1_C2570	BD1L1_HUMAN Biorientation of chromosomes in cell division protein 1-like 1 OS=Homo sapiens OX=9606 GN=BOD1L1 PE=1 SV=2	K	NA	NA	C#ITGQESK	NA	NA	1	NA	NA	0.040814	1
Q8IZH2	132	XRN1	XRN1_C132	XRN1_HUMAN 5'-3' exoribonuclease 1 OS=Homo sapiens OX=9606 GN=XRN1 PE=1 SV=1	N	NA	NA	C#ITPGTEFMAR	NA	NA	1	NA	NA	0.403396	1
Q9UNE7	244	STUB1	STUB1_C244	CHIP_HUMAN E3 ubiquitin-protein ligase CHIP OS=Homo sapiens OX=9606 GN=STUB1 PE=1 SV=2	P	NA	NA	C#ITPSGITYDR	NA	NA	1	NA	NA	0.199571	1
Q06265	46	EXOSC9	EXOSC9_C46	EXOS9_HUMAN Exosome complex component RRP45 OS=Homo sapiens OX=9606 GN=EXOSC9 PE=1 SV=3	C	NA	NA	C#IVELGK	NA	NA	1	NA	NA	0.123973	1
Q9UHA2	34	SS18L2	SS18L2_C34	S18L2_HUMAN SS18-like protein 2 OS=Homo sapiens OX=9606 GN=SS18L2 PE=1 SV=1	R	NA	NA	C#IVEYQNK	NA	NA	1	NA	NA	0.0723996	1
Q14566	393	MCM6	MCM6_C393	MCM6_HUMAN DNA replication licensing factor MCM6 OS=Homo sapiens OX=9606 GN=MCM6 PE=1 SV=1	V	NA	NA	C#IVGDPSTAK	NA	NA	1	NA	NA	0.0631234	1
Q5H9R7	467	PPP6R3	PPP6R3_C467	PP6R3_HUMAN Serine/threonine-protein phosphatase 6 regulatory subunit 3 OS=Homo sapiens OX=9606 GN=PPP6R3 PE=1 SV=2	N	NA	NA	C#IVHSTDK C#IVHST	NA	NA	3	NA	NA	0.0368452	1
Q9UBU9	528	NXF1	NXF1_C528	NXF1_HUMAN Nuclear RNA export factor 1 OS=Homo sapiens OX=9606 GN=NXF1 PE=1 SV=1	L	NA	NA	C#IVNDELFVR	NA	NA	1	NA	NA	0.230481	1
Q9H2C0	274	GAN	GAN_C274	GAN_HUMAN Gigaxonin OS=Homo sapiens OX=9606 GN=GAN PE=1 SV=1	E	NA	NA	C#IVTVGGEER	NA	NA	1	NA	NA	0.337098	1
Q9UBT2	185	UBA2	UBA2_C185	SAE2_HUMAN SUMO-activating enzyme subunit 2 OS=Homo sapiens OX=9606 GN=UBA2 PE=1 SV=2	H	NA	NA	C#IVWAK	NA	NA	1	NA	NA	0.211296	1
O60927	62	PPP1R11	PPP1R11_C62	PP1RB_HUMAN E3 ubiquitin-protein ligase PPP1R11 OS=Homo sapiens OX=9606 GN=PPP1R11 PE=1 SV=1	C	NA	NA	C#IYEKPR	NA	NA	2	NA	NA	0.20468	1
P17844	200	DDX5	DDX5_C200	DDX5_HUMAN Probable ATP-dependent RNA helicase DDX5 OS=Homo sapiens OX=9606 GN=DDX5 PE=1 SV=1	T	NA	NA	C#IYGGAPK	NA	NA	2	NA	NA	0.0458658	1
P35658	1003	NUP214	NUP214_C1003	NU214_HUMAN Nuclear pore complex protein Nup214 OS=Homo sapiens OX=9606 GN=NUP214 PE=1 SV=2	S	NA	NA	C#KDDEAVVQAPR	NA	NA	2	NA	NA	0.0208437	1
Q9Y224	19	RTRAF	RTRAF_C19	RTRAF_HUMAN RNA transcription, translation and transport factor protein OS=Homo sapiens OX=9606 GN=RTRAF PE=1 SV=1	N	NA	NA	C#KDETEFR	NA	NA	1	NA	NA	0.354226	1
Q9Y287	38	ITM2B	ITM2B_C38	ITM2B_HUMAN Integral membrane protein 2B OS=Homo sapiens OX=9606 GN=ITM2B PE=1 SV=1	D	NA	NA	C#KDPDDVVPVGQR	NA	NA	3	NA	NA	0.122818	1
Q96ME7	540	ZNF512	ZNF512_C540	ZN512_HUMAN Zinc finger protein 512 OS=Homo sapiens OX=9606 GN=ZNF512 PE=1 SV=2	S	NA	NA	C#KEPEQEPVPAQFQ	NA	NA	1	NA	NA	0.00630198	1
Q16512	317	PKN1	PKN1_C317	PKN1_HUMAN Serine/threonine-protein kinase N1 OS=Homo sapiens OX=9606 GN=PKN1 PE=1 SV=2	L	NA	NA	C#KPAPLTGTL	NA	NA	1	NA	NA	0.167473	1
Q8WUM4	524	PDCD6IP	PDCD6IP_C524	PDC6I_HUMAN Programmed cell death 6-interacting protein OS=Homo sapiens OX=9606 GN=PDCD6IP PE=1 SV=1	L	NA	NA	C#KPEPELNAAIPSANPAK	NA	NA	1	NA	NA	0.00287209	1
O60234	96	GMFG	GMFG_C96	GMFG_HUMAN Glia maturation factor gamma OS=Homo sapiens OX=9606 GN=GMFG PE=1 SV=1	G	NA	NA	C#KPEQQMM	NA	NA	1	NA	NA	0.117697	1
Q02790	107	FKBP4	FKBP4_C107	FKBP4_HUMAN Peptidyl-prolyl cis-trans isomerase FKBP4 OS=Homo sapiens OX=9606 GN=FKBP4 PE=1 SV=3	T	NA	NA	C#KPEYAYGS	NA	NA	1	NA	NA	0.111302	1
Q71F23	38	CENPU	CENPU_C38	CENPU_HUMAN Centromere protein U OS=Homo sapiens OX=9606 GN=CENPU PE=1 SV=1	K	NA	NA	C#KPIDVF	NA	NA	1	NA	NA	0.189516	1
P68402	206	PAFAH1B2	PAFAH1B2_C206	PA1B2_HUMAN Platelet-activating factor acetylhydrolase IB subunit beta OS=Homo sapiens OX=9606 GN=PAFAH1B2 PE=1 SV=1	I	NA	NA	C#KPLHELIMQ	NA	NA	1	NA	NA	0.323397	1
P41162	81	ETV3	ETV3_C81	ETV3_HUMAN ETS translocation variant 3 OS=Homo sapiens OX=9606 GN=ETV3 PE=1 SV=2	K	NA	NA	C#KPQMNYDK	NA	NA	1	NA	NA	0.342396	1
Q99460	806	PSMD1	PSMD1_C806	PSMD1_HUMAN 26S proteasome non-ATPase regulatory subunit 1 OS=Homo sapiens OX=9606 GN=PSMD1 PE=1 SV=2	N	NA	NA	C#KPSTF	NA	NA	1	NA	NA	0.266362	1
P49841	14	GSK3B	GSK3B_C14	GSK3B_HUMAN Glycogen synthase kinase-3 beta OS=Homo sapiens OX=9606 GN=GSK3B PE=1 SV=2	S	NA	NA	C#KPVQQPSAF	NA	NA	1	NA	NA	0.100394	1
Q6PIW4	358	FIGNL1	FIGNL1_C358	FIGL1_HUMAN Fidgetin-like protein 1 OS=Homo sapiens OX=9606 GN=FIGNL1 PE=1 SV=2	Q	NA	NA	C#KPYGAGPTEPAHPVDER	NA	NA	2	NA	NA	0.0103345	1
Q9BU89	254	DOHH	DOHH_C254	DOHH_HUMAN Deoxyhypusine hydroxylase OS=Homo sapiens OX=9606 GN=DOHH PE=1 SV=1	A	NA	NA	C#LAALQAHADDPER	NA	NA	1	NA	NA	0.34614	1
Q8N8A6	338	DDX51	DDX51_C338	DDX51_HUMAN ATP-dependent RNA helicase DDX51 OS=Homo sapiens OX=9606 GN=DDX51 PE=1 SV=3	R	NA	NA	C#LADIVVATPGR	NA	NA	2	NA	NA	0.176879	1
O15226	386	NKRF	NKRF_C386	NKRF_HUMAN NF-kappa-B-repressing factor OS=Homo sapiens OX=9606 GN=NKRF PE=1 SV=2	H	NA	NA	C#LAEGYGTK	NA	NA	1	NA	NA	0.036765	1
P78527	3347	PRKDC	PRKDC_C3347	PRKDC_HUMAN DNA-dependent protein kinase catalytic subunit OS=Homo sapiens OX=9606 GN=PRKDC PE=1 SV=3	A	NA	NA	C#LAEIEEDKAR	NA	NA	1	NA	NA	0.0191719	1
Q9BR61	41	ACBD6	ACBD6_C41	ACBD6_HUMAN Acyl-CoA-binding domain-containing protein 6 OS=Homo sapiens OX=9606 GN=ACBD6 PE=1 SV=1	S	NA	NA	C#LAELFEK	NA	NA	1	NA	NA	0.0370854	1
Q14839	1827	CHD4	CHD4_C1827	CHD4_HUMAN Chromodomain-helicase-DNA-binding protein 4 OS=Homo sapiens OX=9606 GN=CHD4 PE=1 SV=2	E	NA	NA	C#LAESH	NA	NA	1	NA	NA	0.0923712	1
O75150	890	RNF40	RNF40_C890	BRE1B_HUMAN E3 ubiquitin-protein ligase BRE1B OS=Homo sapiens OX=9606 GN=RNF40 PE=1 SV=5	P	NA	NA	C#LAESR	NA	NA	1	NA	NA	0.197478	1
Q9HAU0	891	PLEKHA5	PLEKHA5_C891	PKHA5_HUMAN Pleckstrin homology domain-containing family A member 5 OS=Homo sapiens OX=9606 GN=PLEKHA5 PE=1 SV=1	L	NA	NA	C#LAESTRPR	NA	NA	1	NA	NA	0.243063	1
Q8TEQ6	441	GEMIN5	GEMIN5_C441	GEMI5_HUMAN Gem-associated protein 5 OS=Homo sapiens OX=9606 GN=GEMIN5 PE=1 SV=3	G	NA	NA	C#LAFGTDDGK	NA	NA	1	NA	NA	0.200001	1
Q9NZJ0	590	DTL	DTL_C590	DTL_HUMAN Denticleless protein homolog OS=Homo sapiens OX=9606 GN=DTL PE=1 SV=3	C	NA	NA	C#LAGNQEDLSK	NA	NA	1	NA	NA	0.003603	1
P21359	93	NF1	NF1_C93	NF1_HUMAN Neurofibromin OS=Homo sapiens OX=9606 GN=NF1 PE=1 SV=2	K	NA	NA	C#LAGQPK	NA	NA	1	NA	NA	0.353218	1
Q99956	290	DUSP9	DUSP9_C290	DUS9_HUMAN Dual specificity protein phosphatase 9 OS=Homo sapiens OX=9606 GN=DUSP9 PE=1 SV=1	H	NA	NA	C#LAGVSR	NA	NA	1	NA	NA	0.334556	1
O75367	297	H2AFY	H2AFY_C297	H2AY_HUMAN Core histone macro-H2A.1 OS=Homo sapiens OX=9606 GN=H2AFY PE=1 SV=4	N	NA	NA	C#LALADDKK	NA	NA	1	NA	NA	0.0437503	1
P16615	318	ATP2A2	ATP2A2_C318	AT2A2_HUMAN Sarcoplasmic/endoplasmic reticulum calcium ATPase 2 OS=Homo sapiens OX=9606 GN=ATP2A2 PE=1 SV=1	T	NA	NA	C#LALGTR	NA	NA	1	NA	NA	0.3126	1
P40939	550	HADHA	HADHA_C550	ECHA_HUMAN Trifunctional enzyme subunit alpha, mitochondrial OS=Homo sapiens OX=9606 GN=HADHA PE=1 SV=2	R	NA	NA	C#LAPMMSEVIR	NA	NA	2	NA	NA	0.144452	1
Q7Z460	8	CLASP1	CLASP1_C8	CLAP1_HUMAN CLIP-associating protein 1 OS=Homo sapiens OX=9606 GN=CLASP1 PE=1 SV=1	S	NA	NA	C#LAQVLQK	NA	NA	1	NA	NA	0.173141	1
Q14166	370	TTLL12	TTLL12_C370	TTL12_HUMAN Tubulin--tyrosine ligase-like protein 12 OS=Homo sapiens OX=9606 GN=TTLL12 PE=1 SV=2	D	NA	NA	C#LASIAR	NA	NA	1	NA	NA	0.210414	1
O75691	1794	UTP20	UTP20_C1794	UTP20_HUMAN Small subunit processome component 20 homolog OS=Homo sapiens OX=9606 GN=UTP20 PE=1 SV=3	K	NA	NA	C#LASTTK	NA	NA	1	NA	NA	0.112718	1
P28702	265	RXRB	RXRB_C265	RXRB_HUMAN Retinoic acid receptor RXR-beta OS=Homo sapiens OX=9606 GN=RXRB PE=1 SV=2	K	NA	NA	C#LATGMK	NA	NA	1	NA	NA	0.0547656	1
Q6PJI9	163	WDR59	WDR59_C163	WDR59_HUMAN GATOR complex protein WDR59 OS=Homo sapiens OX=9606 GN=WDR59 PE=1 SV=2	N	NA	NA	C#LATSHDGDVR	NA	NA	1	NA	NA	0.275362	1
Q13427	42	PPIG	PPIG_C42	PPIG_HUMAN Peptidyl-prolyl cis-trans isomerase G OS=Homo sapiens OX=9606 GN=PPIG PE=1 SV=2	R	NA	NA	C#LCTGEK	NA	NA	1	NA	NA	0.261797	1
Q96KR1	899	ZFR	ZFR_C899	ZFR_HUMAN Zinc finger RNA-binding protein OS=Homo sapiens OX=9606 GN=ZFR PE=1 SV=2	K	NA	NA	C#LDALAALR	NA	NA	1	NA	NA	0.0705055	1
Q86VP6	356	CAND1	CAND1_C356	CAND1_HUMAN Cullin-associated NEDD8-dissociated protein 1 OS=Homo sapiens OX=9606 GN=CAND1 PE=1 SV=2	K	NA	NA	C#LDAVVSTR	NA	NA	1	NA	NA	0.0734366	1
O14617	348	AP3D1	AP3D1_C348	AP3D1_HUMAN AP-3 complex subunit delta-1 OS=Homo sapiens OX=9606 GN=AP3D1 PE=1 SV=1	Q	NA	NA	C#LDDKDESIR	NA	NA	1	NA	NA	0.315407	1
Q7Z7K6	240	CENPV	CENPV_C240	CENPV_HUMAN Centromere protein V OS=Homo sapiens OX=9606 GN=CENPV PE=1 SV=1	H	NA	NA	C#LDEGTVR	NA	NA	1	NA	NA	0.0326992	1
O14744	449	PRMT5	PRMT5_C449	ANM5_HUMAN Protein arginine N-methyltransferase 5 OS=Homo sapiens OX=9606 GN=PRMT5 PE=1 SV=4	E	NA	NA	C#LDGAQHF	NA	NA	1	NA	NA	0.0984417	1
Q96RU3	248	FNBP1	FNBP1_C248	FNBP1_HUMAN Formin-binding protein 1 OS=Homo sapiens OX=9606 GN=FNBP1 PE=1 SV=2	K	NA	NA	C#LDGIVK	NA	NA	1	NA	NA	0.160894	1
Q9BY77	338	POLDIP3	POLDIP3_C338	PDIP3_HUMAN Polymerase delta-interacting protein 3 OS=Homo sapiens OX=9606 GN=POLDIP3 PE=1 SV=2	R	NA	NA	C#LDGQPMK	NA	NA	2	NA	NA	0.00825871	1
O43242	483	PSMD3	PSMD3_C483	PSMD3_HUMAN 26S proteasome non-ATPase regulatory subunit 3 OS=Homo sapiens OX=9606 GN=PSMD3 PE=1 SV=2	F	NA	NA	C#LDIHNMSVK C#LDIHNM	NA	NA	2	NA	NA	0.0202618	1
Q8TBB5	465	KLHDC4	KLHDC4_C465	KLDC4_HUMAN Kelch domain-containing protein 4 OS=Homo sapiens OX=9606 GN=KLHDC4 PE=1 SV=1	H	NA	NA	C#LDIHR	NA	NA	1	NA	NA	0.209684	1
P49459	88	UBE2A	UBE2A_C88	UBE2A_HUMAN Ubiquitin-conjugating enzyme E2 A OS=Homo sapiens OX=9606 GN=UBE2A PE=1 SV=2	I	NA	NA	C#LDILQNR	NA	NA	1	NA	NA	0.0573599	1
P15924	798	DSP	DSP_C798	DESP_HUMAN Desmoplakin OS=Homo sapiens OX=9606 GN=DSP PE=1 SV=3	V	NA	NA	C#LDLDKVEAY	NA	NA	1	NA	NA	0.195099	1
Q6P587	100	FAHD1	FAHD1_C100	FAHD1_HUMAN Acylpyruvase FAHD1, mitochondrial OS=Homo sapiens OX=9606 GN=FAHD1 PE=1 SV=2	L	NA	NA	C#LDMTAR	NA	NA	1	NA	NA	0.209833	1
Q9NPQ8	79	RIC8A	RIC8A_C79	RIC8A_HUMAN Synembryn-A OS=Homo sapiens OX=9606 GN=RIC8A PE=1 SV=3	N	NA	NA	C#LDPFTSR	NA	NA	1	NA	NA	0.143823	1
Q6UX53	96	METTL7B	METTL7B_C96	MET7B_HUMAN Methyltransferase-like protein 7B OS=Homo sapiens OX=9606 GN=METTL7B PE=1 SV=2	T	NA	NA	C#LDPNPHFEK	NA	NA	1	NA	NA	0.026044	1
Q96L73	1226	NSD1	NSD1_C1226	NSD1_HUMAN Histone-lysine N-methyltransferase, H3 lysine-36 and H4 lysine-20 specific OS=Homo sapiens OX=9606 GN=NSD1 PE=1 SV=1	D	NA	NA	C#LDSAGPR	NA	NA	1	NA	NA	0.177808	1
Q8N1G4	164	LRRC47	LRRC47_C164	LRC47_HUMAN Leucine-rich repeat-containing protein 47 OS=Homo sapiens OX=9606 GN=LRRC47 PE=1 SV=1	N	NA	NA	C#LDSFPAELFR	NA	NA	1	NA	NA	0.0907831	1
Q9Y490	1392	TLN1	TLN1_C1392	TLN1_HUMAN Talin-1 OS=Homo sapiens OX=9606 GN=TLN1 PE=1 SV=3	G	NA	NA	C#LDSVMENSK	NA	NA	2	NA	NA	0.0371032	1
Q9H1I8	90	ASCC2	ASCC2_C90	ASCC2_HUMAN Activating signal cointegrator 1 complex subunit 2 OS=Homo sapiens OX=9606 GN=ASCC2 PE=1 SV=3	K	NA	NA	C#LDSYLR	NA	NA	1	NA	NA	0.15881	1
Q969V3	310	NCLN	NCLN_C310	NCLN_HUMAN Nicalin OS=Homo sapiens OX=9606 GN=NCLN PE=1 SV=2	L	NA	NA	C#LDTVGR	NA	NA	1	NA	NA	0.272153	1
Q68DQ2	2893	CRYBG3	CRYBG3_C2893	CRBG3_HUMAN Very large A-kinase anchor protein OS=Homo sapiens OX=9606 GN=CRYBG3 PE=1 SV=3	T	NA	NA	C#LDVIGGR	NA	NA	1	NA	NA	0.121072	1
Q8WTT2	606	NOC3L	NOC3L_C606	NOC3L_HUMAN Nucleolar complex protein 3 homolog OS=Homo sapiens OX=9606 GN=NOC3L PE=1 SV=1	Q	NA	NA	C#LDVMLTK	NA	NA	1	NA	NA	0.0753877	1
P11177	249	PDHB	PDHB_C249	ODPB_HUMAN Pyruvate dehydrogenase E1 component subunit beta, mitochondrial OS=Homo sapiens OX=9606 GN=PDHB PE=1 SV=3	H	NA	NA	C#LEAAAVLSK	NA	NA	2	NA	NA	0.00869603	1
Q5SZL2	590	CEP85L	CEP85L_C590	CE85L_HUMAN Centrosomal protein of 85 kDa-like OS=Homo sapiens OX=9606 GN=CEP85L PE=1 SV=1	R	NA	NA	C#LEDGIR	NA	NA	1	NA	NA	0.0443233	1
Q99613	79	EIF3C	EIF3C_C79	EIF3C_HUMAN Eukaryotic translation initiation factor 3 subunit C OS=Homo sapiens OX=9606 GN=EIF3C PE=1 SV=1	K	NA	NA	C#LEEFELLGK	NA	NA	1	NA	NA	0.0139401	1
O75815	261	BCAR3	BCAR3_C261	BCAR3_HUMAN Breast cancer anti-estrogen resistance protein 3 OS=Homo sapiens OX=9606 GN=BCAR3 PE=1 SV=1	R	NA	NA	C#LEEHYGTSPGQAR	NA	NA	1	NA	NA	0.0154973	1
P49721	163	PSMB2	PSMB2_C163	PSB2_HUMAN Proteasome subunit beta type-2 OS=Homo sapiens OX=9606 GN=PSMB2 PE=1 SV=1	K	NA	NA	C#LEELQK	NA	NA	1	NA	NA	0.123829	1
Q9NR46	326	SH3GLB2	SH3GLB2_C326	SHLB2_HUMAN Endophilin-B2 OS=Homo sapiens OX=9606 GN=SH3GLB2 PE=1 SV=1	L	NA	NA	C#LEEVAPPASGTR	NA	NA	1	NA	NA	0.0564992	1
Q9Y5U2	99	TSSC4	TSSC4_C99	TSSC4_HUMAN Protein TSSC4 OS=Homo sapiens OX=9606 GN=TSSC4 PE=1 SV=3	D	NA	NA	C#LEGAAR	NA	NA	1	NA	NA	0.160761	1
O95551	6	TDP2	TDP2_C6	TYDP2_HUMAN Tyrosyl-DNA phosphodiesterase 2 OS=Homo sapiens OX=9606 GN=TDP2 PE=1 SV=1	S	NA	NA	C#LEGGR	NA	NA	1	NA	NA	0.224572	1
P30876	224	POLR2B	POLR2B_C224	RPB2_HUMAN DNA-directed RNA polymerase II subunit RPB2 OS=Homo sapiens OX=9606 GN=POLR2B PE=1 SV=1	S	NA	NA	C#LENSSR	NA	NA	1	NA	NA	0.0789027	1
Q9H4A4	69	RNPEP	RNPEP_C69	AMPB_HUMAN Aminopeptidase B OS=Homo sapiens OX=9606 GN=RNPEP PE=1 SV=2	R	NA	NA	C#LEPEGAAELR	NA	NA	1	NA	NA	0.0329838	1
Q9H583	1237	HEATR1	HEATR1_C1237	HEAT1_HUMAN HEAT repeat-containing protein 1 OS=Homo sapiens OX=9606 GN=HEATR1 PE=1 SV=3	R	NA	NA	C#LEPLPQEQGNMEYTK	NA	NA	1	NA	NA	0.0230028	1
O95239	190	KIF4A	KIF4A_C190	KIF4A_HUMAN Chromosome-associated kinesin KIF4A OS=Homo sapiens OX=9606 GN=KIF4A PE=1 SV=3	S	NA	NA	C#LEQGNNSR	NA	NA	1	NA	NA	0.0303879	1
O00411	319	POLRMT	POLRMT_C319	RPOM_HUMAN DNA-directed RNA polymerase, mitochondrial OS=Homo sapiens OX=9606 GN=POLRMT PE=1 SV=2	R	NA	NA	C#LEQMSQEGLK	NA	NA	1	NA	NA	0.219112	1
P42858	2526	HTT	HTT_C2526	HD_HUMAN Huntingtin OS=Homo sapiens OX=9606 GN=HTT PE=1 SV=2	S	NA	NA	C#LEQQPR	NA	NA	1	NA	NA	0.107517	1
O75386	151	TULP3	TULP3_C151	TULP3_HUMAN Tubby-related protein 3 OS=Homo sapiens OX=9606 GN=TULP3 PE=1 SV=2	A	NA	NA	C#LERPNSASSQ	NA	NA	1	NA	NA	0.170641	1
P46736	228	BRCC3	BRCC3_C228	BRCC3_HUMAN Lys-63-specific deubiquitinase BRCC36 OS=Homo sapiens OX=9606 GN=BRCC3 PE=1 SV=2	V	NA	NA	C#LESAVELPK	NA	NA	1	NA	NA	0.325823	1
Q99590	506	SCAF11	SCAF11_C506	SCAFB_HUMAN Protein SCAF11 OS=Homo sapiens OX=9606 GN=SCAF11 PE=1 SV=2	L	NA	NA	C#LESEISENILEK	NA	NA	2	NA	NA	0.0371355	1
Q6ZSR9	251	YJ005_HUMAN	YJ005_HUMAN_C251	YJ005_HUMAN Uncharacterized protein FLJ45252 OS=Homo sapiens OX=9606 PE=2 SV=2	S	NA	NA	C#LESGGHSNDR	NA	NA	1	NA	NA	0.0214648	1
P19544	137	WT1	WT1_C137	WT1_HUMAN Wilms tumor protein OS=Homo sapiens OX=9606 GN=WT1 PE=1 SV=2	S	NA	NA	C#LESQPAIR	NA	NA	1	NA	NA	0.138149	1
P35579	1379	MYH9	MYH9_C1379	MYH9_HUMAN Myosin-9 OS=Homo sapiens OX=9606 GN=MYH9 PE=1 SV=4	G	NA	NA	C#LETAEEVKR	NA	NA	2	NA	NA	0.0267638	1
O95071	2094	UBR5	UBR5_C2094	UBR5_HUMAN E3 ubiquitin-protein ligase UBR5 OS=Homo sapiens OX=9606 GN=UBR5 PE=1 SV=2	N	NA	NA	C#LEVLPTK	NA	NA	1	NA	NA	0.144451	1
Q9P215	369	POGK	POGK_C369	POGK_HUMAN Pogo transposable element with KRAB domain OS=Homo sapiens OX=9606 GN=POGK PE=1 SV=2	I	NA	NA	C#LEVPSR	NA	NA	1	NA	NA	0.257443	1
Q6PJG2	16	ELMSAN1	ELMSAN1_C16	EMSA1_HUMAN ELM2 and SANT domain-containing protein 1 OS=Homo sapiens OX=9606 GN=ELMSAN1 PE=1 SV=2	R	NA	NA	C#LFGGQEPAPK	NA	NA	1	NA	NA	0.0238894	1
Q06210	264	GFPT1	GFPT1_C264	GFPT1_HUMAN Glutamine--fructose-6-phosphate aminotransferase [isomerizing] 1 OS=Homo sapiens OX=9606 GN=GFPT1 PE=1 SV=3	T	NA	NA	C#LFPVEEK	NA	NA	2	NA	NA	0.239227	1
Q6PJT7	634	ZC3H14	ZC3H14_C634	ZC3HE_HUMAN Zinc finger CCCH domain-containing protein 14 OS=Homo sapiens OX=9606 GN=ZC3H14 PE=1 SV=1	K	NA	NA	C#LFVHPN	NA	NA	1	NA	NA	0.116726	1
Q6ZRI6	145	C15orf39	C15orf39_C145	CO039_HUMAN Uncharacterized protein C15orf39 OS=Homo sapiens OX=9606 GN=C15orf39 PE=1 SV=3	T	NA	NA	C#LGEGAVK	NA	NA	1	NA	NA	0.117204	1
Q9NU22	2158	MDN1	MDN1_C2158	MDN1_HUMAN Midasin OS=Homo sapiens OX=9606 GN=MDN1 PE=1 SV=2	K	NA	NA	C#LGEGGK	NA	NA	2	NA	NA	0.123415	1
Q9H1H9	81	KIF13A	KIF13A_C81	KI13A_HUMAN Kinesin-like protein KIF13A OS=Homo sapiens OX=9606 GN=KIF13A PE=1 SV=2	K	NA	NA	C#LGEGILEK	NA	NA	1	NA	NA	0.306991	1
Q8WZA9	340	IRGQ	IRGQ_C340	IRGQ_HUMAN Immunity-related GTPase family Q protein OS=Homo sapiens OX=9606 GN=IRGQ PE=1 SV=1	E	NA	NA	C#LGEGK	NA	NA	1	NA	NA	0.223353	1
Q9UHB6	164	LIMA1	LIMA1_C164	LIMA1_HUMAN LIM domain and actin-binding protein 1 OS=Homo sapiens OX=9606 GN=LIMA1 PE=1 SV=1	N	NA	NA	C#LGESR	NA	NA	1	NA	NA	0.212482	1
P40939	713	HADHA	HADHA_C713	ECHA_HUMAN Trifunctional enzyme subunit alpha, mitochondrial OS=Homo sapiens OX=9606 GN=HADHA PE=1 SV=2	P	NA	NA	C#LGGPFR	NA	NA	1	NA	NA	0.116377	1
O00257	438	CBX4	CBX4_C438	CBX4_HUMAN E3 SUMO-protein ligase CBX4 OS=Homo sapiens OX=9606 GN=CBX4 PE=1 SV=3	T	NA	NA	C#LGGSPAAER	NA	NA	1	NA	NA	0.35665	1
O15381	431	NVL	NVL_C431	NVL_HUMAN Nuclear valosin-containing protein-like OS=Homo sapiens OX=9606 GN=NVL PE=1 SV=1	I	NA	NA	C#LGIPDEASR	NA	NA	1	NA	NA	0.344298	1
Q12874	437	SF3A3	SF3A3_C437	SF3A3_HUMAN Splicing factor 3A subunit 3 OS=Homo sapiens OX=9606 GN=SF3A3 PE=1 SV=1	R	NA	NA	C#LGIPNTAHFA C#LGIPNTAH	NA	NA	2	NA	NA	0.0180601	1
P38606	394	ATP6V1A	ATP6V1A_C394	VATA_HUMAN V-type proton ATPase catalytic subunit A OS=Homo sapiens OX=9606 GN=ATP6V1A PE=1 SV=2	K	NA	NA	C#LGNPER	NA	NA	1	NA	NA	0.104755	1
Q86VP6	71	CAND1	CAND1_C71	CAND1_HUMAN Cullin-associated NEDD8-dissociated protein 1 OS=Homo sapiens OX=9606 GN=CAND1 PE=1 SV=2	K	NA	NA	C#LGPLVSK	NA	NA	2	NA	NA	0.185696	1
Q9BU89	61	DOHH	DOHH_C61	DOHH_HUMAN Deoxyhypusine hydroxylase OS=Homo sapiens OX=9606 GN=DOHH PE=1 SV=1	Y	NA	NA	C#LGQMQDAR	NA	NA	1	NA	NA	0.165774	1
O75717	598	WDHD1	WDHD1_C598	WDHD1_HUMAN WD repeat and HMG-box DNA-binding protein 1 OS=Homo sapiens OX=9606 GN=WDHD1 PE=1 SV=1	Q	NA	NA	C#LGVQLLELGK	NA	NA	1	NA	NA	0.0107575	1
Q9UBF2	44	COPG2	COPG2_C44	COPG2_HUMAN Coatomer subunit gamma-2 OS=Homo sapiens OX=9606 GN=COPG2 PE=1 SV=1	R	NA	NA	C#LHILTK	NA	NA	1	NA	NA	0.228223	1
Q8WUA4	310	GTF3C2	GTF3C2_C310	TF3C2_HUMAN General transcription factor 3C polypeptide 2 OS=Homo sapiens OX=9606 GN=GTF3C2 PE=1 SV=2	K	NA	NA	C#LHLTK	NA	NA	1	NA	NA	0.337451	1
Q9NW13	490	RBM28	RBM28_C490	RBM28_HUMAN RNA-binding protein 28 OS=Homo sapiens OX=9606 GN=RBM28 PE=1 SV=3	L	NA	NA	C#LHNLPK	NA	NA	4	NA	NA	0.240177	1
[truncated: 1,058 more rows]
