# Supplementary material for: Proteolysis-assisted cyclization facilitates site-centric target deconvolution of isothiocyanates
Source: Research Square preprint supplement (doi:10.21203/rs.3.rs-5055115/v1), 2025-10-08
Supplement: Supplementary file 4 [file 751692058be94f5b5f82a29d.xlsx]

## Sheet: Legend
Supplementary Data 3. LysC-based PAC for mapping in situ ITCyne-adducted sites in the HEK293T proteome. HEK293T cells treated with 500 μM ITCyne were harvested, lysed and digested with LysC. The resulting probe-labeled peptides were conjugated with Az-UV-biotin via CuAAC. The biotinylated peptides were captured with streptavidin and photoreleased for LC-MS/MS-based proteomics.

## Sheet: Data S3
Uniprot Accession #	Site #	Genename	Genename_Site#	Description	AA in P(-1)	Modified sequences		Spectrum counts		Medium identification score		# of duplicate
						BP1	BP2	BP1	BP2	BP1	BP2
P45880	47	VDAC2	VDAC2_C47	VDAC2_HUMAN Voltage-dependent anion-selective channel protein 2 OS=Homo sapiens OX=9606 GN=VDAC2 PE=1 SV=2	S	C#SGVEFSTSGSSNTDTGK	C#SGVEFSTSGSSNTDTGK	5	5	0.0026272	7.64e-05	2
P06748	104	NPM1	NPM1_C104	NPM_HUMAN Nucleophosmin OS=Homo sapiens OX=9606 GN=NPM1 PE=1 SV=2	K	C#GSGPVHISGQHLVAVEEDAESEDEEEEDVK	C#GSGPVHISGQHLVAVEEDAESEDEEEEDVK	2	2	0.000109481	0.000308	2
Q9H6F5	127	CCDC86	CCDC86_C127	CCD86_HUMAN Coiled-coil domain-containing protein 86 OS=Homo sapiens OX=9606 GN=CCDC86 PE=1 SV=1	K	C#SQDQGVLASELAQNK	C#SQDQGVLASELAQNK	2	2	0.0434867	0.000185704	2
P30050	17	RPL12	RPL12_C17	RL12_HUMAN 60S ribosomal protein L12 OS=Homo sapiens OX=9606 GN=RPL12 PE=1 SV=1	R	C#TGGEVGATSALAPK	C#TGGEVGATSALAPK	6	6	0.00562764	0.0015876	2
P27816	635	MAP4	MAP4_C635	MAP4_HUMAN Microtubule-associated protein 4 OS=Homo sapiens OX=9606 GN=MAP4 PE=1 SV=3	K	C#SLPAEEDSVLEK	C#SLPAEEDSVLEK	1	1	0.000402248	5.64e-05	2
P13639	369	EEF2	EEF2_C369	EF2_HUMAN Elongation factor 2 OS=Homo sapiens OX=9606 GN=EEF2 PE=1 SV=4	R	C#ELLYEGPPDDEAAMGIK	C#ELLYEGPPDDEAAMGIK	5	4	0.00360447	0.000329	2
P49792	2696	RANBP2	RANBP2_C2696	RBP2_HUMAN E3 SUMO-protein ligase RanBP2 OS=Homo sapiens OX=9606 GN=RANBP2 PE=1 SV=2	K	C#RPLEENTADNEK	C#RPLEENTADNEK	3	3	0.0253181	0.023988	2
Q15181	242	PPA1	PPA1_C242	IPYR_HUMAN Inorganic pyrophosphatase OS=Homo sapiens OX=9606 GN=PPA1 PE=1 SV=2	S	C#MNTTLSESPFK	C#MNTTLSESPFK	1	1	0.000831548	0.000654712	2
Q9Y3F4	305	STRAP	STRAP_C305	STRAP_HUMAN Serine-threonine kinase receptor-associated protein OS=Homo sapiens OX=9606 GN=STRAP PE=1 SV=1	K	C#VLPEEDSGELAK	C#VLPEEDSGELAK	2	2	0.0381442	0.00691508	2
P05388	27	RPLP0	RPLP0_C27	RLA0_HUMAN 60S acidic ribosomal protein P0 OS=Homo sapiens OX=9606 GN=RPLP0 PE=1 SV=1	K	C#FIVGADNVGSK	C#FIVGADNVGSK	3	2	0.0531879	0.00765978	2
P63000	6	RAC1	RAC1_C6	RAC1_HUMAN Ras-related C3 botulinum toxin substrate 1 OS=Homo sapiens OX=9606 GN=RAC1 PE=1 SV=1	K	C#VVVGDGAVGK	C#VVVGDGAVGK	1	1	0.00244964	0.000973703	2
O95757	540	HSPA4L	HSPA4L_C540	HS74L_HUMAN Heat shock 70 kDa protein 4L OS=Homo sapiens OX=9606 GN=HSPA4L PE=1 SV=3	K	C#HAEHTPEEEIDHTGAK	C#HAEHTPEEEIDHTGAK	2	1	0.00281752	0.000423811	2
P0DMV8	574	HSPA1A	HSPA1A_C574	HS71A_HUMAN Heat shock 70 kDa protein 1A OS=Homo sapiens OX=9606 GN=HSPA1A PE=1 SV=1	K	C#QEVISWLDANTLAEK	C#QEVISWLDANTLAEK	2	2	0.0117694	0.00531618	2
Q99832	158	CCT7	CCT7_C158	TCPH_HUMAN T-complex protein 1 subunit eta OS=Homo sapiens OX=9606 GN=CCT7 PE=1 SV=2	K	C#AMTALSSK	C#AMTALSSK	2	2	0.00275714	0.000836323	2
P11142	574	HSPA8	HSPA8_C574	HSP7C_HUMAN Heat shock cognate 71 kDa protein OS=Homo sapiens OX=9606 GN=HSPA8 PE=1 SV=1	K	C#NEIINWLDK	C#NEIINWLDK	3	3	0.00353148	0.000946436	2
Q9BZL1	18	UBL5	UBL5_C18	UBL5_HUMAN Ubiquitin-like protein 5 OS=Homo sapiens OX=9606 GN=UBL5 PE=1 SV=1	K	C#NTDDTIGDLK	C#NTDDTIGDLK C#NTDDTIGDLKK	1	2	0.00386531	0.0402447	2
O60333	356	KIF1B	KIF1B_C356	KIF1B_HUMAN Kinesin-like protein KIF1B OS=Homo sapiens OX=9606 GN=KIF1B PE=1 SV=5	K	C#NAVINEDPNAK	C#NAVINEDPNAK	1	1	0.00405727	0.00816654	2
P49588	773	AARS	AARS_C773	SYAC_HUMAN Alanine--tRNA ligase, cytoplasmic OS=Homo sapiens OX=9606 GN=AARS PE=1 SV=2	K	C#LSVMEAK	C#LSVMEAK	2	2	0.11658	0.0792647	2
Q15020	670	SART3	SART3_C670	SART3_HUMAN Squamous cell carcinoma antigen recognized by T-cells 3 OS=Homo sapiens OX=9606 GN=SART3 PE=1 SV=1	K	C#AAVDVEPPSK	C#AAVDVEPPSK	4	4	0.0132749	0.0221313	2
P08238	412	HSP90AB1	HSP90AB1_C412	HS90B_HUMAN Heat shock protein HSP 90-beta OS=Homo sapiens OX=9606 GN=HSP90AB1 PE=1 SV=4	K	C#LELFSELAEDK	C#LELFSELAEDK	2	2	0.104128	0.0105541	2
P50914	54	RPL14	RPL14_C54	RL14_HUMAN 60S ribosomal protein L14 OS=Homo sapiens OX=9606 GN=RPL14 PE=1 SV=4	K	C#MQLTDFILK	C#MQLTDFILK	1	1	0.00518065	0.0168024	2
P33992	397	MCM5	MCM5_C397	MCM5_HUMAN DNA replication licensing factor MCM5 OS=Homo sapiens OX=9606 GN=MCM5 PE=1 SV=5	K	C#SPIGVYTSGK	C#SPIGVYTSGK	2	2	0.0743206	0.0198484	2
Q9P0M6	286	H2AFY2	H2AFY2_C286	H2AW_HUMAN Core histone macro-H2A.2 OS=Homo sapiens OX=9606 GN=H2AFY2 PE=1 SV=3	K	C#EEQLEETIK	C#EEQLEETIK	1	1	0.00638404	0.0271015	2
O14929	27	HAT1	HAT1_C27	HAT1_HUMAN Histone acetyltransferase type B catalytic subunit OS=Homo sapiens OX=9606 GN=HAT1 PE=1 SV=1	K	C#NTNTAIELK	C#NTNTAIELK	2	2	0.0112277	0.00412152	2
Q32MZ4	456	LRRFIP1	LRRFIP1_C456	LRRF1_HUMAN Leucine-rich repeat flightless-interacting protein 1 OS=Homo sapiens OX=9606 GN=LRRFIP1 PE=1 SV=2	K	C#MVEVPQELETSTGHSLEK	C#MVEVPQELETSTGHSLEK	2	1	0.0338419	0.00287444	2
Q9BTT0	87	ANP32E	ANP32E_C87	AN32E_HUMAN Acidic leucine-rich nuclear phosphoprotein 32 family member E OS=Homo sapiens OX=9606 GN=ANP32E PE=1 SV=1	K	C#PNLTYLNLSGNK	C#PNLTYLNLSGNK	2	2	0.02759	0.0301517	2
P30519	265	HMOX2	HMOX2_C265	HMOX2_HUMAN Heme oxygenase 2 OS=Homo sapiens OX=9606 GN=HMOX2 PE=1 SV=2	K	C#PFYAAEQDK	C#PFYAAEQDK	2	2	0.0205874	0.0233758	2
Q96AE4	148	FUBP1	FUBP1_C148	FUBP1_HUMAN Far upstream element-binding protein 1 OS=Homo sapiens OX=9606 GN=FUBP1 PE=1 SV=3	S	C#MLTGTPESVQSAK	C#MLTGTPESVQSAK	1	1	0.0113929	0.00426143	2
O94804	888	STK10	STK10_C888	STK10_HUMAN Serine/threonine-protein kinase 10 OS=Homo sapiens OX=9606 GN=STK10 PE=1 SV=1	K	C#HLLVEHETQK	C#HLLVEHETQK	1	1	0.0123377	0.00181499	2
Q9UL46	91	PSME2	PSME2_C91	PSME2_HUMAN Proteasome activator complex subunit 2 OS=Homo sapiens OX=9606 GN=PSME2 PE=1 SV=4	K	C#GFLPGNEK	C#GFLPGNEK	1	2	0.0127581	0.0113172	2
P37108	56	SRP14	SRP14_C56	SRP14_HUMAN Signal recognition particle 14 kDa protein OS=Homo sapiens OX=9606 GN=SRP14 PE=1 SV=2	K	C#LLRATDGK	C#LLRATDGK	2	2	0.0486645	0.0756518	2
P33992	197	MCM5	MCM5_C197	MCM5_HUMAN DNA replication licensing factor MCM5 OS=Homo sapiens OX=9606 GN=MCM5 PE=1 SV=5	K	C#NTDQAGRPK	C#NTDQAGRPK	4	2	0.0228805	0.213957	2
P60981	23	DSTN	DSTN_C23	DEST_HUMAN Destrin OS=Homo sapiens OX=9606 GN=DSTN PE=1 SV=3	K	C#STPEEIK C#STPEEIKK	C#STPEEIK C#STPEEIKK	3	4	0.0357066	0.0328051	2
P09936	90	UCHL1	UCHL1_C90	UCHL1_HUMAN Ubiquitin carboxyl-terminal hydrolase isozyme L1 OS=Homo sapiens OX=9606 GN=UCHL1 PE=1 SV=2	S	C#GTIGLIHAVANNQDK	C#GTIGLIHAVANNQDK	2	2	0.0326637	0.0156441	2
Q99613	79	EIF3C	EIF3C_C79	EIF3C_HUMAN Eukaryotic translation initiation factor 3 subunit C OS=Homo sapiens OX=9606 GN=EIF3C PE=1 SV=1	K	C#LEEFELLGK	C#LEEFELLGK	1	1	0.018021	0.00329822	2
Q15021	286	NCAPD2	NCAPD2_C286	CND1_HUMAN Condensin complex subunit 1 OS=Homo sapiens OX=9606 GN=NCAPD2 PE=1 SV=3	K	C#PQELSRDPSGTK	C#PQELSRDPSGTK	2	2	0.0453487	0.0764354	2
Q9Y490	1087	TLN1	TLN1_C1087	TLN1_HUMAN Talin-1 OS=Homo sapiens OX=9606 GN=TLN1 PE=1 SV=3	K	C#TQDLGNSTK	C#TQDLGNSTK	1	1	0.019243	0.0030411	2
Q92945	436	KHSRP	KHSRP_C436	FUBP2_HUMAN Far upstream element-binding protein 2 OS=Homo sapiens OX=9606 GN=KHSRP PE=1 SV=4	K	C#GLVIGRGGENVK	C#GLVIGRGGENVK	4	4	0.0475768	0.0593441	2
Q13813	1314	SPTAN1	SPTAN1_C1314	SPTN1_HUMAN Spectrin alpha chain, non-erythrocytic 1 OS=Homo sapiens OX=9606 GN=SPTAN1 PE=1 SV=3	K	C#TELNQAWSSLGK	C#TELNQAWSSLGK	1	1	0.0220299	0.00629184	2
O14744	344	PRMT5	PRMT5_C344	ANM5_HUMAN Protein arginine N-methyltransferase 5 OS=Homo sapiens OX=9606 GN=PRMT5 PE=1 SV=4	K	C#LLDRVPEEEK	C#LLDRVPEEEK	1	1	0.0227055	0.176871	2
P78347	745	GTF2I	GTF2I_C745	GTF2I_HUMAN General transcription factor II-I OS=Homo sapiens OX=9606 GN=GTF2I PE=1 SV=2	K	C#GEALGLK	C#GEALGLK	2	3	0.0308479	0.0494448	2
Q00325	91	SLC25A3	SLC25A3_C91	MPCP_HUMAN Phosphate carrier protein, mitochondrial OS=Homo sapiens OX=9606 GN=SLC25A3 PE=1 SV=2	K	C#RMQVDPQK	C#RMQVDPQK	3	2	0.132829	0.160801	2
O75152	636	ZC3H11A	ZC3H11A_C636	ZC11A_HUMAN Zinc finger CCCH domain-containing protein 11A OS=Homo sapiens OX=9606 GN=ZC3H11A PE=1 SV=3	K	C#AAQTLEK	C#AAQTLEK	2	2	0.142728	0.304279	2
Q9Y277	36	VDAC3	VDAC3_C36	VDAC3_HUMAN Voltage-dependent anion-selective channel protein 3 OS=Homo sapiens OX=9606 GN=VDAC3 PE=1 SV=1	S	C#SGVEFSTSGHAYTDTGK	C#SGVEFSTSGHAYTDTGK	1	1	0.0271659	0.0117482	2
Q9BTC0	455	DIDO1	DIDO1_C455	DIDO1_HUMAN Death-inducer obliterator 1 OS=Homo sapiens OX=9606 GN=DIDO1 PE=1 SV=5	K	C#GAQAGIK	C#GAQAGIK	1	1	0.0273247	0.00835289	2
P61224	118	RAP1B	RAP1B_C118	RAP1B_HUMAN Ras-related protein Rap-1b OS=Homo sapiens OX=9606 GN=RAP1B PE=1 SV=1	K	C#DLEDERVVGK	C#DLEDERVVGK	2	2	0.111813	0.0449786	2
P10809	237	HSPD1	HSPD1_C237	CH60_HUMAN 60 kDa heat shock protein, mitochondrial OS=Homo sapiens OX=9606 GN=HSPD1 PE=1 SV=2	K	C#EFQDAYVLLSEK	C#EFQDAYVLLSEK	2	3	0.0934401	0.0121314	2
O14981	1542	BTAF1	BTAF1_C1542	BTAF1_HUMAN TATA-binding protein-associated factor 172 OS=Homo sapiens OX=9606 GN=BTAF1 PE=1 SV=2	K	C#DVDETVSSATLSEETEKPK	C#DVDETVSSATLSEETEKPK	1	1	0.0319216	0.0340267	2
Q15758	363	SLC1A5	SLC1A5_C363	AAAT_HUMAN Neutral amino acid transporter B(0) OS=Homo sapiens OX=9606 GN=SLC1A5 PE=1 SV=2	K	C#VEENNGVAK	C#VEENNGVAK	1	1	0.0325631	0.076742	2
P41091	105	EIF2S3	EIF2S3_C105	IF2G_HUMAN Eukaryotic translation initiation factor 2 subunit 3 OS=Homo sapiens OX=9606 GN=EIF2S3 PE=1 SV=3	S	C#GSSTPDEFPTDIPGTK	C#GSSTPDEFPTDIPGTK	3	4	0.0556692	0.0148443	2
P48556	112	PSMD8	PSMD8_C112	PSMD8_HUMAN 26S proteasome non-ATPase regulatory subunit 8 OS=Homo sapiens OX=9606 GN=PSMD8 PE=1 SV=2	K	C#GEELGRLK	C#GEELGRLK	1	1	0.0333374	0.0419601	2
Q14789	1964	GOLGB1	GOLGB1_C1964	GOGB1_HUMAN Golgin subfamily B member 1 OS=Homo sapiens OX=9606 GN=GOLGB1 PE=1 SV=2	K	C#VSELEEEK	C#VSELEEEK	1	1	0.0347439	0.0102685	2
Q5JRA6	1486	MIA3	MIA3_C1486	TGO1_HUMAN Transport and Golgi organization protein 1 homolog OS=Homo sapiens OX=9606 GN=MIA3 PE=1 SV=1	K	C#NLEDQVK	C#NLEDQVK	1	1	0.0377888	0.0184028	2
P17812	491	CTPS1	CTPS1_C491	PYRG1_HUMAN CTP synthase 1 OS=Homo sapiens OX=9606 GN=CTPS1 PE=1 SV=2	K	C#LEEQGLK	C#LEEQGLK	1	2	0.0384603	0.0100979	2
P52815	45	MRPL12	MRPL12_C45	RM12_HUMAN 39S ribosomal protein L12, mitochondrial OS=Homo sapiens OX=9606 GN=MRPL12 PE=1 SV=2	R	C#EALAGAPLDNAPK	C#EALAGAPLDNAPK	1	1	0.039643	0.00265112	2
O75717	180	WDHD1	WDHD1_C180	WDHD1_HUMAN WD repeat and HMG-box DNA-binding protein 1 OS=Homo sapiens OX=9606 GN=WDHD1 PE=1 SV=1	K	C#NDVINAK	C#NDVINAK	1	1	0.039725	0.0921987	2
P35579	1379	MYH9	MYH9_C1379	MYH9_HUMAN Myosin-9 OS=Homo sapiens OX=9606 GN=MYH9 PE=1 SV=4	G	C#LETAEEVK	C#LETAEEVK	1	1	0.043989	0.0144054	2
O75369	1617	FLNB	FLNB_C1617	FLNB_HUMAN Filamin-B OS=Homo sapiens OX=9606 GN=FLNB PE=1 SV=2	K	C#LATGPGIASTVK	C#LATGPGIASTVK	1	1	0.0441634	0.00907496	2
Q8WUM4	691	PDCD6IP	PDCD6IP_C691	PDC6I_HUMAN Programmed cell death 6-interacting protein OS=Homo sapiens OX=9606 GN=PDCD6IP PE=1 SV=1	K	C#SDIVFARK	C#SDIVFARK	1	1	0.0453762	0.0210488	2
Q13616	355	CUL1	CUL1_C355	CUL1_HUMAN Cullin-1 OS=Homo sapiens OX=9606 GN=CUL1 PE=1 SV=2	K	C#GEAALNDPK	C#GEAALNDPK	1	1	0.0460581	0.0466767	2
Q9Y3A5	119	SBDS	SBDS_C119	SBDS_HUMAN Ribosome maturation protein SBDS OS=Homo sapiens OX=9606 GN=SBDS PE=1 SV=4	K	C#VNPETK	C#VNPETK	1	1	0.0468014	0.0365842	2
O00231	289	PSMD11	PSMD11_C289	PSD11_HUMAN 26S proteasome non-ATPase regulatory subunit 11 OS=Homo sapiens OX=9606 GN=PSMD11 PE=1 SV=3	K	C#VAQASK	C#VAQASK	1	1	0.0480285	0.0352552	2
Q13642	71	FHL1	FHL1_C71	FHL1_HUMAN Four and a half LIM domains protein 1 OS=Homo sapiens OX=9606 GN=FHL1 PE=1 SV=4	K	C#LHPLANETFVAK	C#LHPLANETFVAK	1	1	0.0500166	0.0422991	2
O75874	73	IDH1	IDH1_C73	IDHC_HUMAN Isocitrate dehydrogenase [NADP] cytoplasmic OS=Homo sapiens OX=9606 GN=IDH1 PE=1 SV=2	K	C#ATITPDEK	C#ATITPDEK	1	2	0.0509073	0.0247599	2
P20810	328	CAST	CAST_C328	ICAL_HUMAN Calpastatin OS=Homo sapiens OX=9606 GN=CAST PE=1 SV=4	K	C#GEDDETIPSEYRLK	C#GEDDETIPSEYRLK	1	1	0.0514434	0.0157362	2
Q9NW13	392	RBM28	RBM28_C392	RBM28_HUMAN RNA-binding protein 28 OS=Homo sapiens OX=9606 GN=RBM28 PE=1 SV=3	K	C#LLAASPENEAGGLK	C#LLAASPENEAGGLK	2	1	0.0534137	0.00401954	2
P10768	11	ESD	ESD_C11	ESTD_HUMAN S-formylglutathione hydrolase OS=Homo sapiens OX=9606 GN=ESD PE=1 SV=2	K	C#FGGLQK	C#FGGLQK	1	1	0.0519577	0.0242507	2
P46013	958	MKI67	MKI67_C958	KI67_HUMAN Proliferation marker protein Ki-67 OS=Homo sapiens OX=9606 GN=MKI67 PE=1 SV=2	K	C#APMSDLTDLK	C#APMSDLTDLK	2	2	0.0608202	0.109098	2
P55209	88	NAP1L1	NAP1L1_C88	NP1L1_HUMAN Nucleosome assembly protein 1-like 1 OS=Homo sapiens OX=9606 GN=NAP1L1 PE=1 SV=1	K	C#AQIEAK	C#AQIEAK	2	2	0.0947497	0.0250486	2
P13639	651	EEF2	EEF2_C651	EF2_HUMAN Elongation factor 2 OS=Homo sapiens OX=9606 GN=EEF2 PE=1 SV=4	W	C#FGPDGTGPNILTDITK	C#FGPDGTGPNILTDITK	1	1	0.0595305	0.0085256	2
Q96J01	134	THOC3	THOC3_C134	THOC3_HUMAN THO complex subunit 3 OS=Homo sapiens OX=9606 GN=THOC3 PE=1 SV=1	K	C#IATVNTK	C#IATVNTK	1	1	0.061171	0.0127586	2
P10599	73	TXN	TXN_C73	THIO_HUMAN Thioredoxin OS=Homo sapiens OX=9606 GN=TXN PE=1 SV=3	K	C#MPTFQFFK	C#MPTFQFFK	1	1	0.0618307	0.057165	2
Q69YN2	160	CWF19L1	CWF19L1_C160	C19L1_HUMAN CWF19-like protein 1 OS=Homo sapiens OX=9606 GN=CWF19L1 PE=1 SV=2	K	C#VGNFGNSSGEVDTK	C#VGNFGNSSGEVDTK	1	1	0.0628631	0.0298629	2
P62258	98	YWHAE	YWHAE_C98	1433E_HUMAN 14-3-3 protein epsilon OS=Homo sapiens OX=9606 GN=YWHAE PE=1 SV=1	C	C#DILDVLDK	C#DILDVLDK	1	1	0.0632436	0.0214836	2
O75821	25	EIF3G	EIF3G_C25	EIF3G_HUMAN Eukaryotic translation initiation factor 3 subunit G OS=Homo sapiens OX=9606 GN=EIF3G PE=1 SV=2	K	C#VTSELLK	C#VTSELLK	1	1	0.0644226	0.0236811	2
P07814	1487	EPRS	EPRS_C1487	SYEP_HUMAN Bifunctional glutamate/proline--tRNA ligase OS=Homo sapiens OX=9606 GN=EPRS PE=1 SV=5	L	C#ELQPGAK	C#ELQPGAK	1	1	0.0651588	0.0356131	2
P33992	221	MCM5	MCM5_C221	MCM5_HUMAN DNA replication licensing factor MCM5 OS=Homo sapiens OX=9606 GN=MCM5 PE=1 SV=5	K	C#VDFQTLK	C#VDFQTLK	2	1	0.068543	0.0104906	2
Q5TC12	321	ATPAF1	ATPAF1_C321	ATPF1_HUMAN ATP synthase mitochondrial F1 complex assembly factor 1 OS=Homo sapiens OX=9606 GN=ATPAF1 PE=1 SV=1	K	C#AQNQNK C#AQNQNKT	C#AQNQNK	2	1	0.213914	0.0393668	2
Q96J02	57	ITCH	ITCH_C57	ITCH_HUMAN E3 ubiquitin-protein ligase Itchy homolog OS=Homo sapiens OX=9606 GN=ITCH PE=1 SV=2	K	C#NNTNSPK	C#NNTNSPK	2	2	0.106146	0.112586	2
P18754	93	RCC1	RCC1_C93	RCC1_HUMAN Regulator of chromosome condensation OS=Homo sapiens OX=9606 GN=RCC1 PE=1 SV=1	G	C#NDEGALGRDTSVEGSEMVPGK	C#NDEGALGRDTSVEGSEMVPGK	1	1	0.0692672	0.0754128	2
Q15185	58	PTGES3	PTGES3_C58	TEBP_HUMAN Prostaglandin E synthase 3 OS=Homo sapiens OX=9606 GN=PTGES3 PE=1 SV=1	H	C#IDPNDSK	C#IDPNDSK	1	1	0.0703785	0.0221981	2
Q9UBC2	470	EPS15L1	EPS15L1_C470	EP15R_HUMAN Epidermal growth factor receptor substrate 15-like 1 OS=Homo sapiens OX=9606 GN=EPS15L1 PE=1 SV=1	K	C#QDETQMISSLK	C#QDETQMISSLK	2	2	0.101518	0.00984152	2
Q9UEW8	99	STK39	STK39_C99	STK39_HUMAN STE20/SPS1-related proline-alanine-rich protein kinase OS=Homo sapiens OX=9606 GN=STK39 PE=1 SV=3	K	C#QTSMDELLK	C#QTSMDELLK	1	1	0.0760069	0.00803166	2
Q04206	38	RELA	RELA_C38	TF65_HUMAN Transcription factor p65 OS=Homo sapiens OX=9606 GN=RELA PE=1 SV=2	K	C#EGRSAGSIPGERSTDTTK	C#EGRSAGSIPGERSTDTTK	2	2	0.122396	0.0754241	2
P26641	266	EEF1G	EEF1G_C266	EF1G_HUMAN Elongation factor 1-gamma OS=Homo sapiens OX=9606 GN=EEF1G PE=1 SV=3	E	C#EQALAAEPK	C#EQALAAEPK	1	1	0.0765106	0.0164698	2
P60981	46	DSTN	DSTN_C46	DEST_HUMAN Destrin OS=Homo sapiens OX=9606 GN=DSTN PE=1 SV=3	K	C#IIVEEGK	C#IIVEEGK	1	1	0.0773964	0.034439	2
Q15424	362	SAFB	SAFB_C362	SAFB1_HUMAN Scaffold attachment factor B1 OS=Homo sapiens OX=9606 GN=SAFB PE=1 SV=4	A	C#NEVPPAPK	C#NEVPPAPK	1	1	0.0776502	0.0269438	2
Q96B01	254	RAD51AP1	RAD51AP1_C254	R51A1_HUMAN RAD51-associated protein 1 OS=Homo sapiens OX=9606 GN=RAD51AP1 PE=1 SV=1	K	C#NALVTSVDSAPAAVK	C#NALVTSVDSAPAAVK	1	1	0.08186	0.00559389	2
P63167	24	DYNLL1	DYNLL1_C24	DYL1_HUMAN Dynein light chain 1, cytoplasmic OS=Homo sapiens OX=9606 GN=DYNLL1 PE=1 SV=1	E	C#ATQALEK	C#ATQALEK	1	2	0.082269	0.179258	2
Q01518	356	CAP1	CAP1_C356	CAP1_HUMAN Adenylyl cyclase-associated protein 1 OS=Homo sapiens OX=9606 GN=CAP1 PE=1 SV=5	K	C#VNTTLQIK	C#VNTTLQIK	1	1	0.082405	0.0868633	2
P33992	570	MCM5	MCM5_C570	MCM5_HUMAN DNA replication licensing factor MCM5 OS=Homo sapiens OX=9606 GN=MCM5 PE=1 SV=5	K	C#GPRLSAEAAEK	C#GPRLSAEAAEK	1	1	0.0824345	0.0826124	2
Q9BYW2	900	SETD2	SETD2_C900	SETD2_HUMAN Histone-lysine N-methyltransferase SETD2 OS=Homo sapiens OX=9606 GN=SETD2 PE=1 SV=3	K	C#GENTSPVLDAVLK	C#GENTSPVLDAVLK	1	1	0.0833032	0.168623	2
P49368	173	CCT3	CCT3_C173	TCPG_HUMAN T-complex protein 1 subunit gamma OS=Homo sapiens OX=9606 GN=CCT3 PE=1 SV=4	A	C#NIALDAVK	C#NIALDAVK	1	1	0.0833658	0.0260004	2
P14866	581	HNRNPL	HNRNPL_C581	HNRPL_HUMAN Heterogeneous nuclear ribonucleoprotein L OS=Homo sapiens OX=9606 GN=HNRNPL PE=1 SV=2	L	C#FSTAQHAS	C#FSTAQHAS	1	2	0.088042	0.0564673	2
P83731	36	RPL24	RPL24_C36	RL24_HUMAN 60S ribosomal protein L24 OS=Homo sapiens OX=9606 GN=RPL24 PE=1 SV=1	K	C#ESAFLSK	C#ESAFLSK	2	2	0.0929612	0.0289172	2
P0DPB5	37	POLR1D	POLR1D_C37	RPC22_HUMAN Protein POLR1D, isoform 2 OS=Homo sapiens OX=9606 GN=POLR1D PE=1 SV=1	K	C#PLASTNK	C#PLASTNK	1	1	0.091567	0.0345702	2
O15067	270	PFAS	PFAS_C270	PUR4_HUMAN Phosphoribosylformylglycinamidine synthase OS=Homo sapiens OX=9606 GN=PFAS PE=1 SV=4	F	C#DNSSAIQGK	C#DNSSAIQGK	1	1	0.0917994	0.0115759	2
P67936	154	TPM4	TPM4_C154	TPM4_HUMAN Tropomyosin alpha-4 chain OS=Homo sapiens OX=9606 GN=TPM4 PE=1 SV=3	K	C#GDLEEELK	C#GDLEEELK	1	1	0.0926163	0.0257127	2
O60841	749	EIF5B	EIF5B_C749	IF2P_HUMAN Eukaryotic translation initiation factor 5B OS=Homo sapiens OX=9606 GN=EIF5B PE=1 SV=4	K	C#PFIVALNK	C#PFIVALNK	1	1	0.0959394	0.0360636	2
Q8WZA9	373	IRGQ	IRGQ_C373	IRGQ_HUMAN Immunity-related GTPase family Q protein OS=Homo sapiens OX=9606 GN=IRGQ PE=1 SV=1	K	C#SAGSQK	C#SAGSQK	1	1	0.0984417	0.130972	2
P21333	2543	FLNA	FLNA_C2543	FLNA_HUMAN Filamin-A OS=Homo sapiens OX=9606 GN=FLNA PE=1 SV=4	T	C#APQHGAPGPGPADASK	C#APQHGAPGPGPADASK	1	1	0.0997397	0.0260859	2
Q15061	315	WDR43	WDR43_C315	WDR43_HUMAN WD repeat-containing protein 43 OS=Homo sapiens OX=9606 GN=WDR43 PE=1 SV=3	N	C#TIQIATPGK	C#TIQIATPGK	1	1	0.103405	0.0153423	2
Q15185	40	PTGES3	PTGES3_C40	TEBP_HUMAN Prostaglandin E synthase 3 OS=Homo sapiens OX=9606 GN=PTGES3 PE=1 SV=1	S	C#LGGSDNFK	C#LGGSDNFK	2	1	0.132481	0.0209893	2
P42566	419	EPS15	EPS15_C419	EPS15_HUMAN Epidermal growth factor receptor substrate 15 OS=Homo sapiens OX=9606 GN=EPS15 PE=1 SV=2	K	C#AEEAQLISSLK	C#AEEAQLISSLK	1	1	0.106443	0.10859	2
Q9Y490	1353	TLN1	TLN1_C1353	TLN1_HUMAN Talin-1 OS=Homo sapiens OX=9606 GN=TLN1 PE=1 SV=3	M	C#TQQAPGQK	C#TQQAPGQK	1	1	0.106605	0.0155608	2
Q13155	168	AIMP2	AIMP2_C168	AIMP2_HUMAN Aminoacyl tRNA synthase complex-interacting multifunctional protein 2 OS=Homo sapiens OX=9606 GN=AIMP2 PE=1 SV=2	K	C#FGEQNK	C#FGEQNK	3	4	0.125645	0.161642	2
P14618	424	PKM	PKM_C424	KPYM_HUMAN Pyruvate kinase PKM OS=Homo sapiens OX=9606 GN=PKM PE=1 SV=4	C	C#SGAIIVLTK	C#SGAIIVLTK	2	2	0.146069	0.0995275	2
O60870	212	KIN	KIN_C212	KIN17_HUMAN DNA/RNA-binding protein KIN17 OS=Homo sapiens OX=9606 GN=KIN PE=1 SV=2	A	C#SSSGATSSK	C#SSSGATSSK	1	1	0.115533	0.328101	2
P09874	24	PARP1	PARP1_C24	PARP1_HUMAN Poly [ADP-ribose] polymerase 1 OS=Homo sapiens OX=9606 GN=PARP1 PE=1 SV=4	K	C#SESIPK	C#SESIPK	1	1	0.124347	0.0450817	2
O15523	221	DDX3Y	DDX3Y_C221	DDX3Y_HUMAN ATP-dependent RNA helicase DDX3Y OS=Homo sapiens OX=9606 GN=DDX3Y PE=1 SV=2	A	C#AQTGSGK	C#AQTGSGK	1	1	0.128667	0.0535562	2
P78362	131	SRPK2	SRPK2_C131	SRPK2_HUMAN SRSF protein kinase 2 OS=Homo sapiens OX=9606 GN=SRPK2 PE=1 SV=3	K	C#VRESDPSDPNK	C#VRESDPSDPNK	1	1	0.130533	0.0162171	2
O95453	169	PARN	PARN_C169	PARN_HUMAN Poly(A)-specific ribonuclease PARN OS=Homo sapiens OX=9606 GN=PARN PE=1 SV=1	K	C#PVTIPEDQK	C#PVTIPEDQK	1	2	0.134066	0.136862	2
P49591	117	SARS	SARS_C117	SYSC_HUMAN Serine--tRNA ligase, cytoplasmic OS=Homo sapiens OX=9606 GN=SARS PE=1 SV=3	K	C#DAERIK	C#DAERIK	1	1	0.134532	0.0521333	2
Q7L0Y3	78	TRMT10C	TRMT10C_C78	TM10C_HUMAN tRNA methyltransferase 10 homolog C OS=Homo sapiens OX=9606 GN=TRMT10C PE=1 SV=2	E	C#VSTISSSK	C#VSTISSSK	1	1	0.135602	0.0209036	2
P26639	237	TARS	TARS_C237	SYTC_HUMAN Threonine--tRNA ligase, cytoplasmic OS=Homo sapiens OX=9606 GN=TARS PE=1 SV=3	K	C#RILNEK	C#RILNEK	2	1	0.136818	0.0490683	2
Q4VCS5	862	AMOT	AMOT_C862	AMOT_HUMAN Angiomotin OS=Homo sapiens OX=9606 GN=AMOT PE=1 SV=1	D	C#STQTERGTESNK	C#STQTERGTESNK	1	1	0.141968	0.0713271	2
P26583	45	HMGB2	HMGB2_C45	HMGB2_HUMAN High mobility group protein B2 OS=Homo sapiens OX=9606 GN=HMGB2 PE=1 SV=2	K	C#SERWK	C#SERWK	3	4	0.199697	0.204627	2
P38398	712	BRCA1	BRCA1_C712	BRCA1_HUMAN Breast cancer type 1 susceptibility protein OS=Homo sapiens OX=9606 GN=BRCA1 PE=1 SV=2	K	C#SNTSELK	C#SNTSELK	1	1	0.146053	0.049341	2
Q5VTR2	905	RNF20	RNF20_C905	BRE1A_HUMAN E3 ubiquitin-protein ligase BRE1A OS=Homo sapiens OX=9606 GN=RNF20 PE=1 SV=2	K	C#DEILMEEIK	C#DEILMEEIK	1	1	0.147896	0.00912989	2
O95861	42	BPNT1	BPNT1_C42	BPNT1_HUMAN 3'(2'),5'-bisphosphate nucleotidase 1 OS=Homo sapiens OX=9606 GN=BPNT1 PE=1 SV=1	T	C#ATDLQTK	C#ATDLQTK	1	1	0.148557	0.0597492	2
P78316	457	NOP14	NOP14_C457	NOP14_HUMAN Nucleolar protein 14 OS=Homo sapiens OX=9606 GN=NOP14 PE=1 SV=3	K	C#NHPSLAEGNK	C#NHPSLAEGNK	1	2	0.150299	0.00635498	2
Q92922	761	SMARCC1	SMARCC1_C761	SMRC1_HUMAN SWI/SNF complex subunit SMARCC1 OS=Homo sapiens OX=9606 GN=SMARCC1 PE=1 SV=3	S	C#IAGTGPDEPEK	C#IAGTGPDEPEK	1	1	0.153235	0.0080433	2
Q00839	648	HNRNPU	HNRNPU_C648	HNRPU_HUMAN Heterogeneous nuclear ribonucleoprotein U OS=Homo sapiens OX=9606 GN=HNRNPU PE=1 SV=6	E	C#FDEITYVELQK	C#FDEITYVELQK	1	1	0.156473	0.0249399	2
Q9NRZ9	205	HELLS	HELLS_C205	HELLS_HUMAN Lymphoid-specific helicase OS=Homo sapiens OX=9606 GN=HELLS PE=1 SV=1	K	C#NGQPVPFQQPK	C#NGQPVPFQQPK	2	1	0.181054	0.0199233	2
A6NHR9	1656	SMCHD1	SMCHD1_C1656	SMHD1_HUMAN Structural maintenance of chromosomes flexible hinge domain-containing protein 1 OS=Homo sapiens OX=9606 GN=SMCHD1 PE=1 SV=2	K	C#QVEEARLK	C#QVEEARLK	1	1	0.157556	0.089644	2
Q14241	339	ELOA	ELOA_C339	ELOA1_HUMAN Elongin-A OS=Homo sapiens OX=9606 GN=ELOA PE=1 SV=2	K	C#LPPSEAASDNHLK	C#LPPSEAASDNHLK	1	1	0.162883	0.216767	2
Q9NZI8	337	IGF2BP1	IGF2BP1_C337	IF2B1_HUMAN Insulin-like growth factor 2 mRNA-binding protein 1 OS=Homo sapiens OX=9606 GN=IGF2BP1 PE=1 SV=2	C	C#RAEQEIMK	C#RAEQEIMK	1	1	0.163293	0.00873919	2
O14777	528	NDC80	NDC80_C528	NDC80_HUMAN Kinetochore protein NDC80 homolog OS=Homo sapiens OX=9606 GN=NDC80 PE=1 SV=1	K	C#ASELESLEK	C#ASELESLEK	1	1	0.165502	0.0784417	2
Q15181	254	PPA1	PPA1_C254	IPYR_HUMAN Inorganic pyrophosphatase OS=Homo sapiens OX=9606 GN=PPA1 PE=1 SV=2	K	C#DPDAARAIVDALPPPCESACTVPTDVDK	C#DPDAARAIVDALPPPCESACTVPTDVDK	1	1	0.170093	0.344792	2
P33764	30	S100A3	S100A3_C30	S10A3_HUMAN Protein S100-A3 OS=Homo sapiens OX=9606 GN=S100A3 PE=1 SV=1	L	C#QAELK	C#QAELK	1	1	0.171391	0.0865197	2
P08670	328	VIM	VIM_C328	VIME_HUMAN Vimentin OS=Homo sapiens OX=9606 GN=VIM PE=1 SV=4	T	C#EVDALK	C#EVDALK	2	2	0.210881	0.0795295	2
Q8NFC6	2570	BOD1L1	BOD1L1_C2570	BD1L1_HUMAN Biorientation of chromosomes in cell division protein 1-like 1 OS=Homo sapiens OX=9606 GN=BOD1L1 PE=1 SV=2	K	C#ITGQESK	C#ITGQESK	1	1	0.176269	0.0437382	2
Q9H9L3	168	ISG20L2	ISG20L2_C168	I20L2_HUMAN Interferon-stimulated 20 kDa exonuclease-like 2 OS=Homo sapiens OX=9606 GN=ISG20L2 PE=1 SV=1	K	C#SGASQK	C#SGASQK	1	1	0.17694	0.0916228	2
Q15181	274	PPA1	PPA1_C274	IPYR_HUMAN Inorganic pyrophosphatase OS=Homo sapiens OX=9606 GN=PPA1 PE=1 SV=2	A	C#TVPTDVDK	C#TVPTDVDK	1	1	0.182625	0.293601	2
P21912	68	SDHB	SDHB_C68	SDHB_HUMAN Succinate dehydrogenase [ubiquinone] iron-sulfur subunit, mitochondrial OS=Homo sapiens OX=9606 GN=SDHB PE=1 SV=3	K	C#GPMVLDALIK	C#GPMVLDALIK	1	1	0.185349	0.0906512	2
P98175	222	RBM10	RBM10_C222	RBM10_HUMAN RNA-binding protein 10 OS=Homo sapiens OX=9606 GN=RBM10 PE=1 SV=3	K	C#GVQNFK	C#GVQNFK	1	1	0.186275	0.0825049	2
Q9P2I0	522	CPSF2	CPSF2_C522	CPSF2_HUMAN Cleavage and polyadenylation specificity factor subunit 2 OS=Homo sapiens OX=9606 GN=CPSF2 PE=1 SV=2	K	C#ISTTESIEIK	C#ISTTESIEIK	2	1	0.271803	0.330669	2
Q5M775	740	SPECC1	SPECC1_C740	CYTSB_HUMAN Cytospin-B OS=Homo sapiens OX=9606 GN=SPECC1 PE=1 SV=1	K	C#EAQQELRTVK	C#EAQQELRTVK	1	2	0.189902	0.210767	2
Q01433	230	AMPD2	AMPD2_C230	AMPD2_HUMAN AMP deaminase 2 OS=Homo sapiens OX=9606 GN=AMPD2 PE=1 SV=2	K	C#GVPFTDLLDAAK	C#GVPFTDLLDAAK	1	1	0.192397	0.0790103	2
Q96RN5	588	MED15	MED15_C588	MED15_HUMAN Mediator of RNA polymerase II transcription subunit 15 OS=Homo sapiens OX=9606 GN=MED15 PE=1 SV=2	K	C#EIALEK	C#EIALEK	1	1	0.196954	0.337271	2
P12270	224	TPR	TPR_C224	TPR_HUMAN Nucleoprotein TPR OS=Homo sapiens OX=9606 GN=TPR PE=1 SV=3	K	C#NLENK	C#NLENK	1	1	0.197005	0.0737229	2
Q15942	565	ZYX	ZYX_C565	ZYX_HUMAN Zyxin OS=Homo sapiens OX=9606 GN=ZYX PE=1 SV=1	K	C#HTARAQT	C#HTARAQT	1	1	0.198808	0.233642	2
P49588	75	AARS	AARS_C75	SYAC_HUMAN Alanine--tRNA ligase, cytoplasmic OS=Homo sapiens OX=9606 GN=AARS PE=1 SV=2	K	C#IRAGGK	C#IRAGGK	1	1	0.20604	0.280672	2
P53618	877	COPB1	COPB1_C877	COPB_HUMAN Coatomer subunit beta OS=Homo sapiens OX=9606 GN=COPB1 PE=1 SV=3	K	C#LTPEK	C#LTPEK	2	3	0.256071	0.153581	2
Q86UP2	1105	KTN1	KTN1_C1105	KTN1_HUMAN Kinectin OS=Homo sapiens OX=9606 GN=KTN1 PE=1 SV=1	E	C#MAGTSGSEEVK	C#MAGTSGSEEVK	1	1	0.21333	0.185104	2
P45880	76	VDAC2	VDAC2_C76	VDAC2_HUMAN Voltage-dependent anion-selective channel protein 2 OS=Homo sapiens OX=9606 GN=VDAC2 PE=1 SV=2	W	C#EYGLTFTEK	C#EYGLTFTEK	1	2	0.21642	0.253137	2
Q9NYP9	25	MIS18A	MIS18A_C25	MS18A_HUMAN Protein Mis18-alpha OS=Homo sapiens OX=9606 GN=MIS18A PE=1 SV=1	K	C#SDSSLLGK	C#SDSSLLGK	1	1	0.217349	0.0946753	2
Q7Z417	234	NUFIP2	NUFIP2_C234	NUFP2_HUMAN Nuclear fragile X mental retardation-interacting protein 2 OS=Homo sapiens OX=9606 GN=NUFIP2 PE=1 SV=1	G	C#ENLNIVQDK	C#ENLNIVQDK	1	1	0.21815	0.214029	2
Q16204	27	CCDC6	CCDC6_C27	CCDC6_HUMAN Coiled-coil domain-containing protein 6 OS=Homo sapiens OX=9606 GN=CCDC6 PE=1 SV=2	S	C#SSTSGGGGGGGGGGGGGK	C#SSTSGGGGGGGGGGGGGK	1	2	0.223203	0.216945	2
P35609	339	ACTN2	ACTN2_C339	ACTN2_HUMAN Alpha-actinin-2 OS=Homo sapiens OX=9606 GN=ACTN2 PE=1 SV=1	K	C#QLEINFNTLQTK	C#QLEINFNTLQTK	1	2	0.229058	0.0124128	2
P49327	313	FASN	FASN_C313	FAS_HUMAN Fatty acid synthase OS=Homo sapiens OX=9606 GN=FASN PE=1 SV=3	L	C#ATRQEPLLIGSTK	C#ATRQEPLLIGSTK	1	1	0.230213	0.157488	2
P08754	3	GNAI3	GNAI3_C3	GNAI3_HUMAN Guanine nucleotide-binding protein G(i) subunit alpha OS=Homo sapiens OX=9606 GN=GNAI3 PE=1 SV=3	G	C#TLSAEDK	C#TLSAEDK	1	1	0.237226	0.0924719	2
P49790	1129	NUP153	NUP153_C1129	NU153_HUMAN Nuclear pore complex protein Nup153 OS=Homo sapiens OX=9606 GN=NUP153 PE=1 SV=2	K	C#QPVFSFGNSEQTK	C#QPVFSFGNSEQTK	2	1	0.280276	0.0146683	2
Q14008	695	CKAP5	CKAP5_C695	CKAP5_HUMAN Cytoskeleton-associated protein 5 OS=Homo sapiens OX=9606 GN=CKAP5 PE=1 SV=3	K	C#GNNAK	C#GNNAK	1	1	0.237811	0.237593	2
P17844	200	DDX5	DDX5_C200	DDX5_HUMAN Probable ATP-dependent RNA helicase DDX5 OS=Homo sapiens OX=9606 GN=DDX5 PE=1 SV=1	T	C#IYGGAPK	C#IYGGAPK	1	1	0.243216	0.179456	2
Q15369	11	ELOC	ELOC_C11	ELOC_HUMAN Elongin-C OS=Homo sapiens OX=9606 GN=ELOC PE=1 SV=1	G	C#EGPDAMYVK	C#EGPDAMYVK	1	1	0.243615	0.0497242	2
Q6PJG2	502	ELMSAN1	ELMSAN1_C502	EMSA1_HUMAN ELM2 and SANT domain-containing protein 1 OS=Homo sapiens OX=9606 GN=ELMSAN1 PE=1 SV=2	K	C#GVEFSEPSLATK	C#GVEFSEPSLATK	1	1	0.259246	0.105083	2
Q8IVD9	260	NUDCD3	NUDCD3_C260	NUDC3_HUMAN NudC domain-containing protein 3 OS=Homo sapiens OX=9606 GN=NUDCD3 PE=1 SV=3	K	C#VLVNLSK	C#VLVNLSK	1	1	0.26115	0.158683	2
P60660	2	MYL6	MYL6_C2	MYL6_HUMAN Myosin light polypeptide 6 OS=Homo sapiens OX=9606 GN=MYL6 PE=1 SV=2	M	C#DFTEDQTAEFK	C#DFTEDQTAEFK	1	1	0.278789	0.0493255	2
Q96HN2	353	AHCYL2	AHCYL2_C353	SAHH3_HUMAN Adenosylhomocysteinase 3 OS=Homo sapiens OX=9606 GN=AHCYL2 PE=1 SV=1	L	C#VPAMNVNDSVTK	C#VPAMNVNDSVTK	1	1	0.291024	0.344178	2
Q16658	121	FSCN1	FSCN1_C121	FSCN1_HUMAN Fascin OS=Homo sapiens OX=9606 GN=FSCN1 PE=1 SV=3	S	C#FAQTVSPAEK	C#FAQTVSPAEK	1	1	0.291277	0.24713	2
O00139	406	KIF2A	KIF2A_C406	KIF2A_HUMAN Kinesin-like protein KIF2A OS=Homo sapiens OX=9606 GN=KIF2A PE=1 SV=3	K	C#VEDVLK	C#VEDVLK	1	1	0.291911	0.0363536	2
Q92879	177	CELF1	CELF1_C177	CELF1_HUMAN CUGBP Elav-like family member 1 OS=Homo sapiens OX=9606 GN=CELF1 PE=1 SV=2	G	C#SSPMVVK	C#SSPMVVK	1	1	0.29935	0.104278	2
O75691	1794	UTP20	UTP20_C1794	UTP20_HUMAN Small subunit processome component 20 homolog OS=Homo sapiens OX=9606 GN=UTP20 PE=1 SV=3	K	C#LASTTK	C#LASTTK	1	1	0.309818	0.438626	2
P22626	50	HNRNPA2B1	HNRNPA2B1_C50	ROA2_HUMAN Heterogeneous nuclear ribonucleoproteins A2/B1 OS=Homo sapiens OX=9606 GN=HNRNPA2B1 PE=1 SV=2	D	C#VVMRDPASK	C#VVMRDPASK	1	2	0.311001	0.0414631	2
P52272	114	HNRNPM	HNRNPM_C114	HNRPM_HUMAN Heterogeneous nuclear ribonucleoprotein M OS=Homo sapiens OX=9606 GN=HNRNPM PE=1 SV=3	G	C#AVVEFK	C#AVVEFK	2	1	0.336392	0.141077	2
P12277	74	CKB	CKB_C74	KCRB_HUMAN Creatine kinase B-type OS=Homo sapiens OX=9606 GN=CKB PE=1 SV=1	G	C#VAGDEESYEVFK	C#VAGDEESYEVFK	1	1	0.318659	0.164206	2
Q15029	674	EFTUD2	EFTUD2_C674	U5S1_HUMAN 116 kDa U5 small nuclear ribonucleoprotein component OS=Homo sapiens OX=9606 GN=EFTUD2 PE=1 SV=1	K	C#FAETPNKK C#FAETPNK	C#FAETPNKK C#FAETPNK	2	3	0.333292	0.253444	2
P17844	354	DDX5	DDX5_C354	DDX5_HUMAN Probable ATP-dependent RNA helicase DDX5 OS=Homo sapiens OX=9606 GN=DDX5 PE=1 SV=1	R	C#DELTRK	C#DELTRK	2	2	0.339176	0.245284	2
Q9UKD2	33	MRTO4	MRTO4_C33	MRT4_HUMAN mRNA turnover protein 4 homolog OS=Homo sapiens OX=9606 GN=MRTO4 PE=1 SV=2	K	C#VDTYK	C#VDTYK	1	2	0.323561	0.248378	2
Q5SW79	776	CEP170	CEP170_C776	CE170_HUMAN Centrosomal protein of 170 kDa OS=Homo sapiens OX=9606 GN=CEP170 PE=1 SV=1	K	C#REETFK	C#REETFK	1	2	0.325975	0.252816	2
Q00765	18	REEP5	REEP5_C18	REEP5_HUMAN Receptor expression-enhancing protein 5 OS=Homo sapiens OX=9606 GN=REEP5 PE=1 SV=3	N	C#MTDLLAK	C#MTDLLAK	1	1	0.335224	0.382885	2
Q16186	357	ADRM1	ADRM1_C357	ADRM1_HUMAN Proteasomal ubiquitin receptor ADRM1 OS=Homo sapiens OX=9606 GN=ADRM1 PE=1 SV=2	M	C#QFGLPAEAVEAANK	C#QFGLPAEAVEAANK	1	1	0.337861	0.355766	2
P38646	317	HSPA9	HSPA9_C317	GRP75_HUMAN Stress-70 protein, mitochondrial OS=Homo sapiens OX=9606 GN=HSPA9 PE=1 SV=2	K	C#ELSSSVQTDINLPYLTMDSSGPK	C#ELSSSVQTDINLPYLTMDSSGPK	1	1	0.342295	0.00112699	2
Q8TDN6	115	BRIX1	BRIX1_C115	BRX1_HUMAN Ribosome biogenesis protein BRX1 homolog OS=Homo sapiens OX=9606 GN=BRIX1 PE=1 SV=2	K	C#IYFEAK	C#IYFEAK	1	1	0.348725	0.339763	2
P60891	165	PRPS1	PRPS1_C165	PRPS1_HUMAN Ribose-phosphate pyrophosphokinase 1 OS=Homo sapiens OX=9606 GN=PRPS1 PE=1 SV=2	N	C#TIVSPDAGGAK	C#TIVSPDAGGAK	1	2	0.382957	0.132505	2
P27694	503	RPA1	RPA1_C503	RFA1_HUMAN Replication protein A 70 kDa DNA-binding subunit OS=Homo sapiens OX=9606 GN=RPA1 PE=1 SV=2	K	C#DTEFPNFK	C#DTEFPNFK	1	1	0.386603	0.239439	2
P05386	61	RPLP1	RPLP1_C61	RLA1_HUMAN 60S acidic ribosomal protein P1 OS=Homo sapiens OX=9606 GN=RPLP1 PE=1 SV=1	I	C#NVGAGGPAPAAGAAPAGGPAPSTAAAPAEEK	NA	1	NA	0.00124315	NA	1
Q9UGI8	164	TES	TES_C164	TES_HUMAN Testin OS=Homo sapiens OX=9606 GN=TES PE=1 SV=1	K	C#HELSPREVK	NA	1	NA	0.0113353	NA	1
P49454	2052	CENPF	CENPF_C2052	CENPF_HUMAN Centromere protein F OS=Homo sapiens OX=9606 GN=CENPF PE=1 SV=3	K	C#ELENQIAQLNK	NA	1	NA	0.0143254	NA	1
Q14566	242	MCM6	MCM6_C242	MCM6_HUMAN DNA replication licensing factor MCM6 OS=Homo sapiens OX=9606 GN=MCM6 PE=1 SV=1	K	C#DFTGTLIVVPDVSK	NA	1	NA	0.0181407	NA	1
Q86TU7	36	SETD3	SETD3_C36	SETD3_HUMAN Actin-histidine N-methyltransferase OS=Homo sapiens OX=9606 GN=SETD3 PE=1 SV=1	K	C#SSPAPGPGK	NA	1	NA	0.0385643	NA	1
P53675	870	CLTCL1	CLTCL1_C870	CLH2_HUMAN Clathrin heavy chain 2 OS=Homo sapiens OX=9606 GN=CLTCL1 PE=1 SV=2	G	C#EEPATHNALAK	NA	1	NA	0.0604741	NA	1
P30419	483	NMT1	NMT1_C483	NMT1_HUMAN Glycylpeptide N-tetradecanoyltransferase 1 OS=Homo sapiens OX=9606 GN=NMT1 PE=1 SV=2	K	C#PSMGAEK	NA	1	NA	0.0620929	NA	1
P51858	12	HDGF	HDGF_C12	HDGF_HUMAN Hepatoma-derived growth factor OS=Homo sapiens OX=9606 GN=HDGF PE=1 SV=1	K	C#GDLVFAK	NA	2	NA	0.171669	NA	1
Q9BQ52	136	ELAC2	ELAC2_C136	RNZ2_HUMAN Zinc phosphodiesterase ELAC protein 2 OS=Homo sapiens OX=9606 GN=ELAC2 PE=1 SV=2	K	C#VLSGPPQLEK	NA	1	NA	0.0800521	NA	1
Q9Y2L1	213	DIS3	DIS3_C213	RRP44_HUMAN Exosome complex exonuclease RRP44 OS=Homo sapiens OX=9606 GN=DIS3 PE=1 SV=2	A	C#LSEEGNEIESGK	NA	1	NA	0.10577	NA	1
Q2TAL8	713	QRICH1	QRICH1_C713	QRIC1_HUMAN Glutamine-rich protein 1 OS=Homo sapiens OX=9606 GN=QRICH1 PE=1 SV=1	K	C#PQSVK	NA	1	NA	0.120081	NA	1
Q9UHB9	525	SRP68	SRP68_C525	SRP68_HUMAN Signal recognition particle subunit SRP68 OS=Homo sapiens OX=9606 GN=SRP68 PE=1 SV=2	K	C#SLQAAAILDANDAHQTETSSSQVK	NA	1	NA	0.131918	NA	1
Q00839	497	HNRNPU	HNRNPU_C497	HNRPU_HUMAN Heterogeneous nuclear ribonucleoprotein U OS=Homo sapiens OX=9606 GN=HNRNPU PE=1 SV=6	D	C#EVVMMIGLPGAGK	NA	1	NA	0.147089	NA	1
Q96ST3	1136	SIN3A	SIN3A_C1136	SIN3A_HUMAN Paired amphipathic helix protein Sin3a OS=Homo sapiens OX=9606 GN=SIN3A PE=1 SV=2	K	C#QRGREQQEK	NA	1	NA	0.147452	NA	1
P19367	886	HK1	HK1_C886	HXK1_HUMAN Hexokinase-1 OS=Homo sapiens OX=9606 GN=HK1 PE=1 SV=3	K	C#NVSFLLSEDGSGK	NA	1	NA	0.153617	NA	1
Q8NHQ9	389	DDX55	DDX55_C389	DDX55_HUMAN ATP-dependent RNA helicase DDX55 OS=Homo sapiens OX=9606 GN=DDX55 PE=1 SV=3	K	C#PLQEMK	NA	1	NA	0.197797	NA	1
P31948	278	STIP1	STIP1_C278	STIP1_HUMAN Stress-induced-phosphoprotein 1 OS=Homo sapiens OX=9606 GN=STIP1 PE=1 SV=1	K	C#RELCEK	NA	1	NA	0.218729	NA	1
P43243	821	MATR3	MATR3_C821	MATR3_HUMAN Matrin-3 OS=Homo sapiens OX=9606 GN=MATR3 PE=1 SV=2	H	C#SSLPHYQK	NA	1	NA	0.247219	NA	1
Q8WXA9	494	SREK1	SREK1_C494	SREK1_HUMAN Splicing regulatory glutamine/lysine-rich protein 1 OS=Homo sapiens OX=9606 GN=SREK1 PE=1 SV=1	N	C#QLNEENLSTK	NA	1	NA	0.250195	NA	1
Q9GZN8	106	C20orf27	C20orf27_C106	CT027_HUMAN UPF0687 protein C20orf27 OS=Homo sapiens OX=9606 GN=C20orf27 PE=1 SV=3	K	C#EYSAHK	NA	1	NA	0.265027	NA	1
Q15181	114	PPA1	PPA1_C114	IPYR_HUMAN Inorganic pyrophosphatase OS=Homo sapiens OX=9606 GN=PPA1 PE=1 SV=2	C	C#GDNDPIDVCEIGSK	NA	1	NA	0.277911	NA	1
Q86VP6	71	CAND1	CAND1_C71	CAND1_HUMAN Cullin-associated NEDD8-dissociated protein 1 OS=Homo sapiens OX=9606 GN=CAND1 PE=1 SV=2	K	C#LGPLVSK	NA	1	NA	0.279963	NA	1
Q5VW32	267	BROX	BROX_C267	BROX_HUMAN BRO1 domain-containing protein BROX OS=Homo sapiens OX=9606 GN=BROX PE=1 SV=1	K	C#GEAIRSLQEAEK	NA	1	NA	0.280544	NA	1
Q8N5D0	312	WDTC1	WDTC1_C312	WDTC1_HUMAN WD and tetratricopeptide repeats protein 1 OS=Homo sapiens OX=9606 GN=WDTC1 PE=1 SV=2	K	C#HSSGEVQNGK	NA	1	NA	0.304857	NA	1
Q32P51	43	HNRNPA1L2	HNRNPA1L2_C43	RA1L2_HUMAN Heterogeneous nuclear ribonucleoprotein A1-like 2 OS=Homo sapiens OX=9606 GN=HNRNPA1L2 PE=2 SV=2	D	C#VVMRDPNTK	NA	1	NA	0.333322	NA	1
Q7Z6K5	183	ARPIN	ARPIN_C183	ARPIN_HUMAN Arpin OS=Homo sapiens OX=9606 GN=ARPIN PE=1 SV=1	K	C#NFTGDGK	NA	1	NA	0.33669	NA	1
Q99460	104	PSMD1	PSMD1_C104	PSMD1_HUMAN 26S proteasome non-ATPase regulatory subunit 1 OS=Homo sapiens OX=9606 GN=PSMD1 PE=1 SV=2	K	C#IDHYTK	NA	1	NA	0.339925	NA	1
Q0VDF9	89	HSPA14	HSPA14_C89	HSP7E_HUMAN Heat shock 70 kDa protein 14 OS=Homo sapiens OX=9606 GN=HSPA14 PE=1 SV=1	K	C#LVIEK	NA	1	NA	0.343185	NA	1
P16615	997	ATP2A2	ATP2A2_C997	AT2A2_HUMAN Sarcoplasmic/endoplasmic reticulum calcium ATPase 2 OS=Homo sapiens OX=9606 GN=ATP2A2 PE=1 SV=1	E	C#VQPATK	NA	1	NA	0.35407	NA	1
Q99873	119	PRMT1	PRMT1_C119	ANM1_HUMAN Protein arginine N-methyltransferase 1 OS=Homo sapiens OX=9606 GN=PRMT1 PE=1 SV=3	E	C#SSISDYAVK	NA	1	NA	0.387594	NA	1
P67870	140	CSNK2B	CSNK2B_C140	CSK2B_HUMAN Casein kinase II subunit beta OS=Homo sapiens OX=9606 GN=CSNK2B PE=1 SV=1	K	NA	C#MDVYTPK	NA	1	NA	0.0118085	1
Q7KZF4	228	SND1	SND1_C228	SND1_HUMAN Staphylococcal nuclease domain-containing protein 1 OS=Homo sapiens OX=9606 GN=SND1 PE=1 SV=1	K	NA	C#PTFRREADGSETPEPFAAEAK	NA	1	NA	0.0195348	1
P43246	873	MSH2	MSH2_C873	MSH2_HUMAN DNA mismatch repair protein Msh2 OS=Homo sapiens OX=9606 GN=MSH2 PE=1 SV=1	K	NA	C#YLEREQGEK	NA	1	NA	0.0228518	1
Q8ND82	242	ZNF280C	ZNF280C_C242	Z280C_HUMAN Zinc finger protein 280C OS=Homo sapiens OX=9606 GN=ZNF280C PE=1 SV=1	K	NA	C#NVQFNLLDPLK	NA	1	NA	0.0313846	1
O15027	1522	SEC16A	SEC16A_C1522	SC16A_HUMAN Protein transport protein Sec16A OS=Homo sapiens OX=9606 GN=SEC16A PE=1 SV=4	K	NA	C#LQNENLIDK	NA	1	NA	0.0327482	1
P07900	420	HSP90AA1	HSP90AA1_C420	HS90A_HUMAN Heat shock protein HSP 90-alpha OS=Homo sapiens OX=9606 GN=HSP90AA1 PE=1 SV=5	K	NA	C#LELFTELAEDK	NA	2	NA	0.0567541	1
P09651	43	HNRNPA1	HNRNPA1_C43	ROA1_HUMAN Heterogeneous nuclear ribonucleoprotein A1 OS=Homo sapiens OX=9606 GN=HNRNPA1 PE=1 SV=5	D	NA	C#VVMRDPNTK	NA	2	NA	0.0598226	1
Q9H974	312	QTRT2	QTRT2_C312	QTRT2_HUMAN Queuine tRNA-ribosyltransferase accessory subunit 2 OS=Homo sapiens OX=9606 GN=QTRT2 PE=1 SV=1	K	NA	C#MDQIK	NA	1	NA	0.044576	1
Q9NVP1	183	DDX18	DDX18_C183	DDX18_HUMAN ATP-dependent RNA helicase DDX18 OS=Homo sapiens OX=9606 GN=DDX18 PE=1 SV=2	L	NA	C#NLVNENTLK	NA	1	NA	0.04608	1
Q92499	668	DDX1	DDX1_C668	DDX1_HUMAN ATP-dependent RNA helicase DDX1 OS=Homo sapiens OX=9606 GN=DDX1 PE=1 SV=2	N	NA	C#TISQVEPDIK	NA	1	NA	0.0644744	1
Q00610	870	CLTC	CLTC_C870	CLH1_HUMAN Clathrin heavy chain 1 OS=Homo sapiens OX=9606 GN=CLTC PE=1 SV=5	G	NA	C#EEPATHNALAK	NA	1	NA	0.0646725	1
Q7Z5K2	133	WAPL	WAPL_C133	WAPL_HUMAN Wings apart-like protein homolog OS=Homo sapiens OX=9606 GN=WAPL PE=1 SV=1	K	NA	C#FPLEDTLLGK	NA	1	NA	0.0713536	1
Q99873	33	PRMT1	PRMT1_C33	ANM1_HUMAN Protein arginine N-methyltransferase 1 OS=Homo sapiens OX=9606 GN=PRMT1 PE=1 SV=3	S	NA	C#GQAESSEKPNAEDMTSK	NA	1	NA	0.0727543	1
P11279	338	LAMP1	LAMP1_C338	LAMP1_HUMAN Lysosome-associated membrane glycoprotein 1 OS=Homo sapiens OX=9606 GN=LAMP1 PE=1 SV=3	K	NA	C#NAEEHVRVTK	NA	1	NA	0.0742133	1
P57076	83	CFAP298	CFAP298_C83	CF298_HUMAN Cilia- and flagella-associated protein 298 OS=Homo sapiens OX=9606 GN=CFAP298 PE=1 SV=1	K	NA	C#VPSGGAVFK	NA	1	NA	0.0833269	1
P17987	218	TCP1	TCP1_C218	TCPA_HUMAN T-complex protein 1 subunit alpha OS=Homo sapiens OX=9606 GN=TCP1 PE=1 SV=1	N	NA	C#VVGSQGMPK	NA	2	NA	0.199277	1
Q70EK9	680	USP51	USP51_C680	UBP51_HUMAN Ubiquitin carboxyl-terminal hydrolase 51 OS=Homo sapiens OX=9606 GN=USP51 PE=1 SV=1	S	NA	C#DDAIITK	NA	1	NA	0.102522	1
P43003	375	SLC1A3	SLC1A3_C375	EAA1_HUMAN Excitatory amino acid transporter 1 OS=Homo sapiens OX=9606 GN=SLC1A3 PE=1 SV=1	K	NA	C#IEENNGVDK	NA	1	NA	0.104874	1
P54136	369	RARS	RARS_C369	SYRC_HUMAN Arginine--tRNA ligase, cytoplasmic OS=Homo sapiens OX=9606 GN=RARS PE=1 SV=2	G	NA	C#SIPLTIVK	NA	1	NA	0.106994	1
O00232	109	PSMD12	PSMD12_C109	PSD12_HUMAN 26S proteasome non-ATPase regulatory subunit 12 OS=Homo sapiens OX=9606 GN=PSMD12 PE=1 SV=3	C	NA	C#TYVEEITDLPIK	NA	1	NA	0.110499	1
P56270	371	MAZ	MAZ_C371	MAZ_HUMAN Myc-associated zinc finger protein OS=Homo sapiens OX=9606 GN=MAZ PE=1 SV=1	K	NA	C#EAAFATK	NA	1	NA	0.111995	1
P25205	134	MCM3	MCM3_C134	MCM3_HUMAN DNA replication licensing factor MCM3 OS=Homo sapiens OX=9606 GN=MCM3 PE=1 SV=3	K	NA	C#SLVRPK	NA	1	NA	0.114418	1
P51991	64	HNRNPA3	HNRNPA3_C64	ROA3_HUMAN Heterogeneous nuclear ribonucleoprotein A3 OS=Homo sapiens OX=9606 GN=HNRNPA3 PE=1 SV=2	D	NA	C#VVMRDPQTK	NA	2	NA	0.160484	1
Q13642	92	FHL1	FHL1_C92	FHL1_HUMAN Four and a half LIM domains protein 1 OS=Homo sapiens OX=9606 GN=FHL1 PE=1 SV=4	K	NA	C#TTREDSPK	NA	2	NA	0.15458	1
O95297	203	MPZL1	MPZL1_C203	MPZL1_HUMAN Myelin protein zero-like protein 1 OS=Homo sapiens OX=9606 GN=MPZL1 PE=1 SV=1	G	NA	C#STSESLSPVK	NA	1	NA	0.137618	1
P00558	50	PGK1	PGK1_C50	PGK1_HUMAN Phosphoglycerate kinase 1 OS=Homo sapiens OX=9606 GN=PGK1 PE=1 SV=3	F	NA	C#LDNGAK	NA	1	NA	0.137988	1
Q9H944	5	MED20	MED20_C5	MED20_HUMAN Mediator of RNA polymerase II transcription subunit 20 OS=Homo sapiens OX=9606 GN=MED20 PE=1 SV=1	T	NA	C#VSQMPVAEGK	NA	1	NA	0.140766	1
Q02040	579	AKAP17A	AKAP17A_C579	AK17A_HUMAN A-kinase anchor protein 17A OS=Homo sapiens OX=9606 GN=AKAP17A PE=1 SV=2	K	NA	C#NREPSK	NA	2	NA	0.23538	1
P13807	699	GYS1	GYS1_C699	GYS1_HUMAN Glycogen [starch] synthase, muscle OS=Homo sapiens OX=9606 GN=GYS1 PE=1 SV=2	S	NA	C#TSSTSGSK	NA	1	NA	0.147892	1
P05388	119	RPLP0	RPLP0_C119	RLA0_HUMAN 60S acidic ribosomal protein P0 OS=Homo sapiens OX=9606 GN=RPLP0 PE=1 SV=1	P	NA	C#EVTVPAQNTGLGPEK	NA	1	NA	0.168142	1
Q8IX18	124	DHX40	DHX40_C124	DHX40_HUMAN Probable ATP-dependent RNA helicase DHX40 OS=Homo sapiens OX=9606 GN=DHX40 PE=1 SV=2	K	NA	C#TLGSK	NA	1	NA	0.18252	1
Q96CS2	156	HAUS1	HAUS1_C156	HAUS1_HUMAN HAUS augmin-like complex subunit 1 OS=Homo sapiens OX=9606 GN=HAUS1 PE=1 SV=1	K	NA	C#LQEDVK	NA	1	NA	0.182618	1
Q12979	201	ABR	ABR_C201	ABR_HUMAN Active breakpoint cluster region-related protein OS=Homo sapiens OX=9606 GN=ABR PE=1 SV=2	K	NA	C#SQSNNQFQK	NA	1	NA	0.187844	1
Q96IY1	175	NSL1	NSL1_C175	NSL1_HUMAN Kinetochore-associated protein NSL1 homolog OS=Homo sapiens OX=9606 GN=NSL1 PE=1 SV=3	K	NA	C#RGETVAK	NA	1	NA	0.194602	1
Q9NYF8	242	BCLAF1	BCLAF1_C242	BCLF1_HUMAN Bcl-2-associated transcription factor 1 OS=Homo sapiens OX=9606 GN=BCLAF1 PE=1 SV=2	S	NA	C#SDAPMLSTVHSAK	NA	1	NA	0.199791	1
O00410	972	IPO5	IPO5_C972	IPO5_HUMAN Importin-5 OS=Homo sapiens OX=9606 GN=IPO5 PE=1 SV=4	N	NA	C#ISAVGK	NA	1	NA	0.206099	1
Q96EE3	315	SEH1L	SEH1L_C315	SEH1_HUMAN Nucleoporin SEH1 OS=Homo sapiens OX=9606 GN=SEH1L PE=1 SV=3	K	NA	C#TGILK	NA	1	NA	0.210802	1
Q12923	2024	PTPN13	PTPN13_C2024	PTN13_HUMAN Tyrosine-protein phosphatase non-receptor type 13 OS=Homo sapiens OX=9606 GN=PTPN13 PE=1 SV=2	K	NA	C#STYQIK	NA	1	NA	0.212534	1
Q9BTE3	636	MCMBP	MCMBP_C636	MCMBP_HUMAN Mini-chromosome maintenance complex-binding protein OS=Homo sapiens OX=9606 GN=MCMBP PE=1 SV=2	K	NA	C#VNGNEL	NA	1	NA	0.218667	1
O43684	129	BUB3	BUB3_C129	BUB3_HUMAN Mitotic checkpoint protein BUB3 OS=Homo sapiens OX=9606 GN=BUB3 PE=1 SV=1	P	NA	C#NAGTFSQPEK	NA	1	NA	0.220497	1
Q9BTF0	441	THUMPD2	THUMPD2_C441	THUM2_HUMAN THUMP domain-containing protein 2 OS=Homo sapiens OX=9606 GN=THUMPD2 PE=2 SV=2	K	NA	C#LNPEEK	NA	1	NA	0.224158	1
Q13616	752	CUL1	CUL1_C752	CUL1_HUMAN Cullin-1 OS=Homo sapiens OX=9606 GN=CUL1 PE=1 SV=2	K	NA	C#IDILIEK	NA	1	NA	0.250821	1
O76021	197	RSL1D1	RSL1D1_C197	RL1D1_HUMAN Ribosomal L1 domain-containing protein 1 OS=Homo sapiens OX=9606 GN=RSL1D1 PE=1 SV=3	D	NA	C#IGGTVLNISK	NA	1	NA	0.25915	1
P41252	1001	IARS	IARS_C1001	SYIC_HUMAN Isoleucine--tRNA ligase, cytoplasmic OS=Homo sapiens OX=9606 GN=IARS PE=1 SV=2	K	NA	C#NLVPTDEITVYYK	NA	1	NA	0.263391	1
Q12959	66	DLG1	DLG1_C66	DLG1_HUMAN Disks large homolog 1 OS=Homo sapiens OX=9606 GN=DLG1 PE=1 SV=2	K	NA	C#IDRSK	NA	1	NA	0.265306	1
P51610	149	HCFC1	HCFC1_C149	HCFC1_HUMAN Host cell factor 1 OS=Homo sapiens OX=9606 GN=HCFC1 PE=1 SV=2	K	NA	C#YLFGGLANDSEDPK	NA	1	NA	0.268847	1
O00273	38	DFFA	DFFA_C38	DFFA_HUMAN DNA fragmentation factor subunit alpha OS=Homo sapiens OX=9606 GN=DFFA PE=1 SV=1	S	NA	C#LEDLRSK	NA	1	NA	0.269324	1
P62820	126	RAB1A	RAB1A_C126	RAB1A_HUMAN Ras-related protein Rab-1A OS=Homo sapiens OX=9606 GN=RAB1A PE=1 SV=3	K	NA	C#DLTTK	NA	1	NA	0.269883	1
Q96EY4	162	TMA16	TMA16_C162	TMA16_HUMAN Translation machinery-associated protein 16 OS=Homo sapiens OX=9606 GN=TMA16 PE=1 SV=2	I	NA	C#ANDAIPK	NA	1	NA	0.270549	1
Q93009	315	USP7	USP7_C315	UBP7_HUMAN Ubiquitin carboxyl-terminal hydrolase 7 OS=Homo sapiens OX=9606 GN=USP7 PE=1 SV=2	T	NA	C#VEGTIPK	NA	1	NA	0.274912	1
P15170	261	GSPT1	GSPT1_C261	ERF3A_HUMAN Eukaryotic peptide chain release factor GTP-binding subunit ERF3A OS=Homo sapiens OX=9606 GN=GSPT1 PE=1 SV=1	P	NA	C#SGLTGANIK	NA	1	NA	0.278891	1
P62979	149	RPS27A	RPS27A_C149	RS27A_HUMAN Ubiquitin-40S ribosomal protein S27a OS=Homo sapiens OX=9606 GN=RPS27A PE=1 SV=2	Y	NA	C#FNKPEDK	NA	1	NA	0.293183	1
Q9H7N4	950	SCAF1	SCAF1_C950	SFR19_HUMAN Splicing factor, arginine/serine-rich 19 OS=Homo sapiens OX=9606 GN=SCAF1 PE=1 SV=3	S	NA	C#SQAAGTK	NA	1	NA	0.300734	1
P57721	141	PCBP3	PCBP3_C141	PCBP3_HUMAN Poly(rC)-binding protein 3 OS=Homo sapiens OX=9606 GN=PCBP3 PE=2 SV=2	Q	NA	C#GSLIGK	NA	1	NA	0.303846	1
O43491	867	EPB41L2	EPB41L2_C867	E41L2_HUMAN Band 4.1-like protein 2 OS=Homo sapiens OX=9606 GN=EPB41L2 PE=1 SV=1	C	NA	C#SEPPVVK	NA	2	NA	0.338448	1
P40227	233	CCT6A	CCT6A_C233	TCPZ_HUMAN T-complex protein 1 subunit zeta OS=Homo sapiens OX=9606 GN=CCT6A PE=1 SV=3	T	NA	C#NVSLEYEK	NA	1	NA	0.308626	1
O43395	630	PRPF3	PRPF3_C630	PRPF3_HUMAN U4/U6 small nuclear ribonucleoprotein Prp3 OS=Homo sapiens OX=9606 GN=PRPF3 PE=1 SV=2	K	NA	C#VLVWEGTAK	NA	1	NA	0.311198	1
O75152	588	ZC3H11A	ZC3H11A_C588	ZC11A_HUMAN Zinc finger CCCH domain-containing protein 11A OS=Homo sapiens OX=9606 GN=ZC3H11A PE=1 SV=3	S	NA	C#NTQVAEK	NA	1	NA	0.315832	1
Q00610	491	CLTC	CLTC_C491	CLH1_HUMAN Clathrin heavy chain 1 OS=Homo sapiens OX=9606 GN=CLTC PE=1 SV=5	Q	NA	C#FAETGQVQK	NA	1	NA	0.321332	1
P23528	139	CFL1	CFL1_C139	COF1_HUMAN Cofilin-1 OS=Homo sapiens OX=9606 GN=CFL1 PE=1 SV=3	N	NA	C#YEEVK	NA	1	NA	0.324643	1
Q9Y277	2	VDAC3	VDAC3_C2	VDAC3_HUMAN Voltage-dependent anion-selective channel protein 3 OS=Homo sapiens OX=9606 GN=VDAC3 PE=1 SV=1	M	NA	C#NTPTYCDLGK	NA	1	NA	0.32545	1
P55010	59	EIF5	EIF5_C59	IF5_HUMAN Eukaryotic translation initiation factor 5 OS=Homo sapiens OX=9606 GN=EIF5 PE=1 SV=2	G	NA	C#ELGAQTQFDVK	NA	1	NA	0.326691	1
Q9H4L7	106	SMARCAD1	SMARCAD1_C106	SMRCD_HUMAN SWI/SNF-related matrix-associated actin-dependent regulator of chromatin subfamily A containing DEAD/H box 1 OS=Homo sapiens OX=9606 GN=SMARCAD1 PE=1 SV=2	N	NA	C#SNTVQEK	NA	1	NA	0.338236	1
Q8WX92	23	NELFB	NELFB_C23	NELFB_HUMAN Negative elongation factor B OS=Homo sapiens OX=9606 GN=NELFB PE=1 SV=1	N	NA	C#TEPLK	NA	1	NA	0.338383	1
Q6IS14	22	EIF5AL1	EIF5AL1_C22	IF5AL_HUMAN Eukaryotic translation initiation factor 5A-1-like OS=Homo sapiens OX=9606 GN=EIF5AL1 PE=2 SV=2	Q	NA	C#SALRK	NA	1	NA	0.339158	1
P55060	842	CSE1L	CSE1L_C842	XPO2_HUMAN Exportin-2 OS=Homo sapiens OX=9606 GN=CSE1L PE=1 SV=3	I	NA	C#AVGITK	NA	1	NA	0.346183	1
P13797	566	PLS3	PLS3_C566	PLST_HUMAN Plastin-3 OS=Homo sapiens OX=9606 GN=PLS3 PE=1 SV=4	G	NA	C#INYDLVK	NA	1	NA	0.348799	1
Q9H361	339	PABPC3	PABPC3_C339	PABP3_HUMAN Polyadenylate-binding protein 3 OS=Homo sapiens OX=9606 GN=PABPC3 PE=1 SV=2	V	NA	C#FSSPEEATK	NA	1	NA	0.352313	1
P62333	170	PSMC6	PSMC6_C170	PRS10_HUMAN 26S proteasome regulatory subunit 10B OS=Homo sapiens OX=9606 GN=PSMC6 PE=1 SV=1	G	NA	C#LLYGPPGTGK	NA	1	NA	0.352536	1
Q15464	224	SHB	SHB_C224	SHB_HUMAN SH2 domain-containing adapter protein B OS=Homo sapiens OX=9606 GN=SHB PE=1 SV=2	K	NA	C#AASAAEESGAGKK	NA	1	NA	0.352696	1
P30044	204	PRDX5	PRDX5_C204	PRDX5_HUMAN Peroxiredoxin-5, mitochondrial OS=Homo sapiens OX=9606 GN=PRDX5 PE=1 SV=4	T	NA	C#SLAPNIISQL	NA	1	NA	0.361698	1
Q96SN8	528	CDK5RAP2	CDK5RAP2_C528	CK5P2_HUMAN CDK5 regulatory subunit-associated protein 2 OS=Homo sapiens OX=9606 GN=CDK5RAP2 PE=1 SV=5	K	NA	C#SSQQPPGSK	NA	1	NA	0.365616	1
Q15431	353	SYCP1	SYCP1_C353	SYCP1_HUMAN Synaptonemal complex protein 1 OS=Homo sapiens OX=9606 GN=SYCP1 PE=1 SV=2	I	NA	C#QLTEEK	NA	1	NA	0.367955	1
Q92667	389	AKAP1	AKAP1_C389	AKAP1_HUMAN A-kinase anchor protein 1, mitochondrial OS=Homo sapiens OX=9606 GN=AKAP1 PE=1 SV=1	S	NA	C#VPVHQK	NA	1	NA	0.370172	1
Q8IWS0	28	PHF6	PHF6_C28	PHF6_HUMAN PHD finger protein 6 OS=Homo sapiens OX=9606 GN=PHF6 PE=1 SV=1	E	NA	C#GQLLISENQK	NA	1	NA	0.375184	1
Q2KHR3	283	QSER1	QSER1_C283	QSER1_HUMAN Glutamine and serine-rich protein 1 OS=Homo sapiens OX=9606 GN=QSER1 PE=1 SV=3	S	NA	C#STEQPLTSTK	NA	1	NA	0.378871	1
Q01518	93	CAP1	CAP1_C93	CAP1_HUMAN Adenylyl cyclase-associated protein 1 OS=Homo sapiens OX=9606 GN=CAP1 PE=1 SV=5	Q	NA	C#QQPAENK	NA	1	NA	0.384822	1
Q96T23	650	RSF1	RSF1_C650	RSF1_HUMAN Remodeling and spacing factor 1 OS=Homo sapiens OX=9606 GN=RSF1 PE=1 SV=2	E	NA	C#QSTSTVGGQSVK	NA	1	NA	0.386436	1
Q13242	138	SRSF9	SRSF9_C138	SRSF9_HUMAN Serine/arginine-rich splicing factor 9 OS=Homo sapiens OX=9606 GN=SRSF9 PE=1 SV=1	V	NA	C#YADVQK	NA	1	NA	0.389299	1
Q8WUA4	310	GTF3C2	GTF3C2_C310	TF3C2_HUMAN General transcription factor 3C polypeptide 2 OS=Homo sapiens OX=9606 GN=GTF3C2 PE=1 SV=2	K	NA	C#LHLTK	NA	1	NA	0.397985	1
Q92922	108	SMARCC1	SMARCC1_C108	SMRC1_HUMAN SWI/SNF complex subunit SMARCC1 OS=Homo sapiens OX=9606 GN=SMARCC1 PE=1 SV=3	K	NA	C#FMDFK	NA	1	NA	0.403641	1
Q4VCS5	741	AMOT	AMOT_C741	AMOT_HUMAN Angiomotin OS=Homo sapiens OX=9606 GN=AMOT PE=1 SV=1	R	NA	C#LDMEGRIK	NA	1	NA	0.406786	1
Q7Z333	1416	SETX	SETX_C1416	SETX_HUMAN Probable helicase senataxin OS=Homo sapiens OX=9606 GN=SETX PE=1 SV=4	K	NA	C#MPSEPETIK	NA	1	NA	0.407494	1
Q99615	298	DNAJC7	DNAJC7_C298	DNJC7_HUMAN DnaJ homolog subfamily C member 7 OS=Homo sapiens OX=9606 GN=DNAJC7 PE=1 SV=2	Y	NA	C#NRGTVNSK	NA	1	NA	0.417351	1
Q96ER9	37	CCDC51	CCDC51_C37	CCD51_HUMAN Coiled-coil domain-containing protein 51 OS=Homo sapiens OX=9606 GN=CCDC51 PE=1 SV=2	L	NA	C#SPGPSQPGEK	NA	1	NA	0.420318	1
Q15005	26	SPCS2	SPCS2_C26	SPCS2_HUMAN Signal peptidase complex subunit 2 OS=Homo sapiens OX=9606 GN=SPCS2 PE=1 SV=3	N	NA	C#GTGSGRSGLLDK	NA	1	NA	0.420416	1
Q9Y277	229	VDAC3	VDAC3_C229	VDAC3_HUMAN Voltage-dependent anion-selective channel protein 3 OS=Homo sapiens OX=9606 GN=VDAC3 PE=1 SV=1	D	NA	C#RTSLSAK	NA	1	NA	0.423978	1
Q9P2J5	936	LARS	LARS_C936	SYLC_HUMAN Leucine--tRNA ligase, cytoplasmic OS=Homo sapiens OX=9606 GN=LARS PE=1 SV=2	H	NA	C#TIYVAK	NA	1	NA	0.443533	1
Q96I24	366	FUBP3	FUBP3_C366	FUBP3_HUMAN Far upstream element-binding protein 3 OS=Homo sapiens OX=9606 GN=FUBP3 PE=1 SV=2	K	NA	C#GLVIGK	NA	1	NA	0.447703	1
P49736	340	MCM2	MCM2_C340	MCM2_HUMAN DNA replication licensing factor MCM2 OS=Homo sapiens OX=9606 GN=MCM2 PE=1 SV=4	F	NA	C#QSQNQEVK	NA	1	NA	0.456758	1
