# Supplementary material for: Proteolysis-assisted cyclization facilitates site-centric target deconvolution of isothiocyanates
Source: Research Square preprint supplement (doi:10.21203/rs.3.rs-5055115/v1), 2025-10-08
Supplement: Supplementary file 5 [file 92c149be58e686ede0df1c32.xlsx]

## Sheet: Legend
Supplementary Data 6. ITCyne-based QTRP analysis of sulforaphane-target interactions. Intact HEK293T cells were treated with or without SFN (100 μM, 4h) and labeled with 1 mM of ITCyne for additional 2h at 37°C. The probe-labeled proteome was then processed into proteolytic peptides with trypsin/ProK. The resulting probe-labeled peptides were conjugated with both light (SFN) and heavy (Control) a…

## Sheet: Data S6
Uniprot Accession #	Site	Genename	Genename_site	Description	Modified sequences		Spectrum count		Determined R (H/L=Control/SFN)		Ratio_Average	SD	CV(%)
P53350	67	PLK1	PLK1_C67	PLK1_HUMAN Serine/threonine-protein kinase PLK1 OS=Homo sapiens OX=9606 GN=PLK1 PE=1 SV=1	#CFEISDADTK	#CFEISDADTK	2	2	9.77	9.265	9.5175	0.357089	3.75192
O60870	43	KIN	KIN_C43	KIN17_HUMAN DNA/RNA-binding protein KIN17 OS=Homo sapiens OX=9606 GN=KIN PE=1 SV=2	NA	#CHCMSESHQR	NA	1	NA	8.37	8.37	NA	NA
P84103	6	SRSF3	SRSF3_C6	SRSF3_HUMAN Serine/arginine-rich splicing factor 3 OS=Homo sapiens OX=9606 GN=SRSF3 PE=1 SV=1	#CPLDCK	NA	1	NA	8.07	NA	8.07	NA	NA
P62854	74	RPS26	RPS26_C74	RS26_HUMAN 40S ribosomal protein S26 OS=Homo sapiens OX=9606 GN=RPS26 PE=1 SV=3	#CVSCAIHSK	NA	1	NA	6.02	NA	6.02	NA	NA
P13489	75	RNH1	RNH1_C75	RINI_HUMAN Ribonuclease inhibitor OS=Homo sapiens OX=9606 GN=RNH1 PE=1 SV=2	#CVLQGLQTPSCK	#CVLQGLQTPSCK	1	2	5.74	5.22	5.48	0.367696	6.70977
P51452	22	DUSP3	DUSP3_C22	DUS3_HUMAN Dual specificity protein phosphatase 3 OS=Homo sapiens OX=9606 GN=DUSP3 PE=1 SV=1	#CYSLPSQPCNEVTPR	#CYSLPSQPCNEVTPR	2	1	5.07	4.44	4.755	0.445477	9.36861
P35869	703	AHR	AHR_C703	AHR_HUMAN Aryl hydrocarbon receptor OS=Homo sapiens OX=9606 GN=AHR PE=1 SV=2	#CNQPVLPQHSK	NA	1	NA	4.62	NA	4.62	NA	NA
Q99569	940	PKP4	PKP4_C940	PKP4_HUMAN Plakophilin-4 OS=Homo sapiens OX=9606 GN=PKP4 PE=1 SV=2	#CALHEVTSK	NA	2	NA	4.395	NA	4.395	NA	NA
Q9H2G2	1153	SLK	SLK_C1153	SLK_HUMAN STE20-like serine/threonine-protein kinase OS=Homo sapiens OX=9606 GN=SLK PE=1 SV=1	#CHLLVEHETQK	#CHLLVEHETQK	3	2	4.26	4.395	4.3275	0.0954594	2.20588
A0AV96	146	RBM47	RBM47_C146	RBM47_HUMAN RNA-binding protein 47 OS=Homo sapiens OX=9606 GN=RBM47 PE=1 SV=2	#CSVDNCR	#CSVDNCR	2	1	4.125	4.45	4.2875	0.22981	5.35999
Q12769	292	NUP160	NUP160_C292	NU160_HUMAN Nuclear pore complex protein Nup160 OS=Homo sapiens OX=9606 GN=NUP160 PE=1 SV=3	NA	#CVEHDAFIF	NA	1	NA	4.23	4.23	NA	NA
P60981	46	DSTN	DSTN_C46	DEST_HUMAN Destrin OS=Homo sapiens OX=9606 GN=DSTN PE=1 SV=3	#CIIVEEGK	#CIIVEEGK	3	4	4.22	4.21	4.215	0.00707107	0.16776
O75717	1008	WDHD1	WDHD1_C1008	WDHD1_HUMAN WD repeat and HMG-box DNA-binding protein 1 OS=Homo sapiens OX=9606 GN=WDHD1 PE=1 SV=1	#CPPQNTENQRPK	NA	1	NA	4.1	NA	4.1	NA	NA
P55072	174	VCP	VCP_C174	TERA_HUMAN Transitional endoplasmic reticulum ATPase OS=Homo sapiens OX=9606 GN=VCP PE=1 SV=4	#CIVAPDTVIHC	NA	1	NA	4.08	NA	4.08	NA	NA
Q9UNQ0	608	ABCG2	ABCG2_C608	ABCG2_HUMAN ATP-binding cassette sub-family G member 2 OS=Homo sapiens OX=9606 GN=ABCG2 PE=1 SV=3	NA	#CTGEEYLVK	NA	1	NA	4.08	4.08	NA	NA
P48507	35	GCLM	GCLM_C35	GSH0_HUMAN Glutamate--cysteine ligase regulatory subunit OS=Homo sapiens OX=9606 GN=GCLM PE=1 SV=1	#CPSTHSEELHDCIQK	#CPSTHSEELHDCIQK	2	1	2.935	5.07	4.0025	1.50967	37.7183
Q9H832	261	UBE2Z	UBE2Z_C261	UBE2Z_HUMAN Ubiquitin-conjugating enzyme E2 Z OS=Homo sapiens OX=9606 GN=UBE2Z PE=1 SV=2	#CPCPEPLR	#CPCPEPLR	1	2	4.37	3.13	3.75	0.876812	23.3817
Q14192	214	FHL2	FHL2_C214	FHL2_HUMAN Four and a half LIM domains protein 2 OS=Homo sapiens OX=9606 GN=FHL2 PE=1 SV=3	NA	#CDLYAK	NA	1	NA	3.5	3.5	NA	NA
Q9Y312	181	AAR2	AAR2_C181	AAR2_HUMAN Protein AAR2 homolog OS=Homo sapiens OX=9606 GN=AAR2 PE=1 SV=2	NA	#CGIECK	NA	1	NA	3.4	3.4	NA	NA
Q7L2J0	244	MEPCE	MEPCE_C244	MEPCE_HUMAN 7SK snRNA methylphosphate capping enzyme OS=Homo sapiens OX=9606 GN=MEPCE PE=1 SV=1	NA	#CTDEGHVVLA	NA	1	NA	3.36	3.36	NA	NA
P13639	812	EEF2	EEF2_C812	EF2_HUMAN Elongation factor 2 OS=Homo sapiens OX=9606 GN=EEF2 PE=1 SV=4	#CVFDHWQ #CVFDHW	#CVFDHW	5	4	3.26	3.34	3.3	0.0565685	1.7142
Q9BTW9	457	TBCD	TBCD_C457	TBCD_HUMAN Tubulin-specific chaperone D OS=Homo sapiens OX=9606 GN=TBCD PE=1 SV=2	#CSVGTNVR	NA	1	NA	3.28	NA	3.28	NA	NA
P49327	1118	FASN	FASN_C1118	FAS_HUMAN Fatty acid synthase OS=Homo sapiens OX=9606 GN=FASN PE=1 SV=3	#CFTPHTEEGCLSER	#CFTPHTE #CFTPHTEEGCLSER	1	4	3.86	2.44	3.15	1.00409	31.8759
Q9UBS8	262	RNF14	RNF14_C262	RNF14_HUMAN E3 ubiquitin-protein ligase RNF14 OS=Homo sapiens OX=9606 GN=RNF14 PE=1 SV=1	#CLNCPEPK	NA	1	NA	3.15	NA	3.15	NA	NA
P41250	466	GARS	GARS_C466	GARS_HUMAN Glycine--tRNA ligase OS=Homo sapiens OX=9606 GN=GARS PE=1 SV=3	#CYDLSCHAR #CYDLSCH	#CYDLSCHAR	3	4	3.22	3.005	3.1125	0.152028	4.88443
Q9C0D5	557	TANC1	TANC1_C557	TANC1_HUMAN Protein TANC1 OS=Homo sapiens OX=9606 GN=TANC1 PE=1 SV=3	NA	#CVQDPVAAFK	NA	1	NA	3.01	3.01	NA	NA
O75911	294	DHRS3	DHRS3_C294	DHRS3_HUMAN Short-chain dehydrogenase/reductase 3 OS=Homo sapiens OX=9606 GN=DHRS3 PE=1 SV=2	NA	#CMNTFK	NA	1	NA	2.97	2.97	NA	NA
P14618	423	PKM	PKM_C423	KPYM_HUMAN Pyruvate kinase PKM OS=Homo sapiens OX=9606 GN=PKM PE=1 SV=4	#CCSGAIIVLTK	#CCSGAIIVLTK #CCSGAIIVL	1	3	3.16	2.77	2.965	0.275772	9.3009
O75663	14	TIPRL	TIPRL_C14	TIPRL_HUMAN TIP41-like protein OS=Homo sapiens OX=9606 GN=TIPRL PE=1 SV=2	#CFGPWK	NA	1	NA	2.89	NA	2.89	NA	NA
Q86W42	279	THOC6	THOC6_C279	THOC6_HUMAN THO complex subunit 6 homolog OS=Homo sapiens OX=9606 GN=THOC6 PE=1 SV=1	NA	#CVNQWQLSGELK	NA	1	NA	2.87	2.87	NA	NA
Q5T4S7	4049	UBR4	UBR4_C4049	UBR4_HUMAN E3 ubiquitin-protein ligase UBR4 OS=Homo sapiens OX=9606 GN=UBR4 PE=1 SV=1	NA	#CNEIHAQ	NA	1	NA	2.87	2.87	NA	NA
P54886	612	ALDH18A1	ALDH18A1_C612	P5CS_HUMAN Delta-1-pyrroline-5-carboxylate synthase OS=Homo sapiens OX=9606 GN=ALDH18A1 PE=1 SV=2	NA	#CNALETLLIHR	NA	1	NA	2.83	2.83	NA	NA
Q99873	119	PRMT1	PRMT1_C119	ANM1_HUMAN Protein arginine N-methyltransferase 1 OS=Homo sapiens OX=9606 GN=PRMT1 PE=1 SV=3	#CSSISDYAVK	#CSSISDYAVK	1	2	2.84	2.8	2.82	0.0282843	1.00299
Q6NXE6	484	ARMC6	ARMC6_C484	ARMC6_HUMAN Armadillo repeat-containing protein 6 OS=Homo sapiens OX=9606 GN=ARMC6 PE=1 SV=2	#CHVELR	NA	1	NA	2.81	NA	2.81	NA	NA
P32780	344	GTF2H1	GTF2H1_C344	TF2H1_HUMAN General transcription factor IIH subunit 1 OS=Homo sapiens OX=9606 GN=GTF2H1 PE=1 SV=1	#CFQPAVK	NA	1	NA	2.78	NA	2.78	NA	NA
Q9UKK3	1293	PARP4	PARP4_C1293	PARP4_HUMAN Protein mono-ADP-ribosyltransferase PARP4 OS=Homo sapiens OX=9606 GN=PARP4 PE=1 SV=3	NA	#CKPTATEPLFK	NA	1	NA	2.74	2.74	NA	NA
Q9UBF6	47	RNF7	RNF7_C47	RBX2_HUMAN RING-box protein 2 OS=Homo sapiens OX=9606 GN=RNF7 PE=1 SV=1	#CDTCAICR	NA	1	NA	2.66	NA	2.66	NA	NA
P26599	23	PTBP1	PTBP1_C23	PTBP1_HUMAN Polypyrimidine tract-binding protein 1 OS=Homo sapiens OX=9606 GN=PTBP1 PE=1 SV=1	#CVTNGPFIM	NA	1	NA	2.63	NA	2.63	NA	NA
Q9NX02	815	NLRP2	NLRP2_C815	NALP2_HUMAN NACHT, LRR and PYD domains-containing protein 2 OS=Homo sapiens OX=9606 GN=NLRP2 PE=1 SV=1	NA	#CVNLSDNELLDEGAK	NA	1	NA	2.63	2.63	NA	NA
Q9HCS7	86	XAB2	XAB2_C86	SYF1_HUMAN Pre-mRNA-splicing factor SYF1 OS=Homo sapiens OX=9606 GN=XAB2 PE=1 SV=2	NA	#CVTDPAYEDVNNCHER	NA	1	NA	2.62	2.62	NA	NA
Q9UJX4	482	ANAPC5	ANAPC5_C482	APC5_HUMAN Anaphase-promoting complex subunit 5 OS=Homo sapiens OX=9606 GN=ANAPC5 PE=1 SV=2	#CFAAASEVLK	NA	1	NA	2.61	NA	2.61	NA	NA
Q8WUM4	512	PDCD6IP	PDCD6IP_C512	PDC6I_HUMAN Programmed cell death 6-interacting protein OS=Homo sapiens OX=9606 GN=PDCD6IP PE=1 SV=1	NA	#CYQSHR	NA	1	NA	2.58	2.58	NA	NA
Q9NP81	64	SARS2	SARS2_C64	SYSM_HUMAN Serine--tRNA ligase, mitochondrial OS=Homo sapiens OX=9606 GN=SARS2 PE=1 SV=1	NA	#CACPEEAAHAL	NA	1	NA	2.57	2.57	NA	NA
Q9NVN8	213	GNL3L	GNL3L_C213	GNL3L_HUMAN Guanine nucleotide-binding protein-like 3-like protein OS=Homo sapiens OX=9606 GN=GNL3L PE=1 SV=1	#CSVPVDQASESLLK	#CSVPVDQASESLLK	2	1	2.755	2.36	2.5575	0.279307	10.9211
Q86Y56	555	DNAAF5	DNAAF5_C555	DAAF5_HUMAN Dynein assembly factor 5, axonemal OS=Homo sapiens OX=9606 GN=DNAAF5 PE=1 SV=4	#CQDLYR	#CQDLYR	1	1	3.69	1.37	2.53	1.64049	64.8414
Q9NR09	4443	BIRC6	BIRC6_C4443	BIRC6_HUMAN Baculoviral IAP repeat-containing protein 6 OS=Homo sapiens OX=9606 GN=BIRC6 PE=1 SV=2	#CVDTYTNR	NA	2	NA	2.53	NA	2.53	NA	NA
O60287	1900	URB1	URB1_C1900	NPA1P_HUMAN Nucleolar pre-ribosomal-associated protein 1 OS=Homo sapiens OX=9606 GN=URB1 PE=1 SV=4	#CQPSSQEPAK	NA	1	NA	2.47	NA	2.47	NA	NA
Q9H6S3	358	EPS8L2	EPS8L2_C358	ES8L2_HUMAN Epidermal growth factor receptor kinase substrate 8-like protein 2 OS=Homo sapiens OX=9606 GN=EPS8L2 PE=1 SV=2	NA	#CSGPDIAR	NA	1	NA	2.46	2.46	NA	NA
Q8WUM9	468	SLC20A1	SLC20A1_C468	S20A1_HUMAN Sodium-dependent phosphate transporter 1 OS=Homo sapiens OX=9606 GN=SLC20A1 PE=1 SV=1	NA	#CNAVSDLHSA	NA	1	NA	2.44	2.44	NA	NA
Q14444	408	CAPRIN1	CAPRIN1_C408	CAPR1_HUMAN Caprin-1 OS=Homo sapiens OX=9606 GN=CAPRIN1 PE=1 SV=2	NA	#CPPVHSESR	NA	1	NA	2.44	2.44	NA	NA
A0AV96	145	RBM47	RBM47_C145	RBM47_HUMAN RNA-binding protein 47 OS=Homo sapiens OX=9606 GN=RBM47 PE=1 SV=2	#CCSVDNCR	NA	1	NA	2.39	NA	2.39	NA	NA
P16615	344	ATP2A2	ATP2A2_C344	AT2A2_HUMAN Sarcoplasmic/endoplasmic reticulum calcium ATPase 2 OS=Homo sapiens OX=9606 GN=ATP2A2 PE=1 SV=1	NA	#CTSVICSDK	NA	1	NA	2.39	2.39	NA	NA
Q6PKG0	502	LARP1	LARP1_C502	LARP1_HUMAN La-related protein 1 OS=Homo sapiens OX=9606 GN=LARP1 PE=1 SV=2	NA	#CPEFVPR	NA	1	NA	2.37	2.37	NA	NA
P50570	27	DNM2	DNM2_C27	DYN2_HUMAN Dynamin-2 OS=Homo sapiens OX=9606 GN=DNM2 PE=1 SV=2	NA	#CHLDLPQIA	NA	1	NA	2.36	2.36	NA	NA
Q96DX4	190	RSPRY1	RSPRY1_C190	RSPRY_HUMAN RING finger and SPRY domain-containing protein 1 OS=Homo sapiens OX=9606 GN=RSPRY1 PE=1 SV=1	NA	#CQDSSHPAK	NA	1	NA	2.34	2.34	NA	NA
Q96HN2	353	AHCYL2	AHCYL2_C353	SAHH3_HUMAN Adenosylhomocysteinase 3 OS=Homo sapiens OX=9606 GN=AHCYL2 PE=1 SV=1	#CVPAMNVNDSVTK	#CVPAMNVNDSVTK	1	2	2.43	2.245	2.3375	0.130815	5.59635
Q92616	55	GCN1	GCN1_C55	GCN1_HUMAN eIF-2-alpha kinase activator GCN1 OS=Homo sapiens OX=9606 GN=GCN1 PE=1 SV=6	#CLTLHR	NA	1	NA	2.33	NA	2.33	NA	NA
Q9Y3E5	36	PTRH2	PTRH2_C36	PTH2_HUMAN Peptidyl-tRNA hydrolase 2, mitochondrial OS=Homo sapiens OX=9606 GN=PTRH2 PE=1 SV=1	NA	#CFGMLPK	NA	1	NA	2.3	2.3	NA	NA
Q86Y56	173	DNAAF5	DNAAF5_C173	DAAF5_HUMAN Dynein assembly factor 5, axonemal OS=Homo sapiens OX=9606 GN=DNAAF5 PE=1 SV=4	NA	#CSLLDPFAAVR	NA	1	NA	2.3	2.3	NA	NA
Q3L8U1	1375	CHD9	CHD9_C1375	CHD9_HUMAN Chromodomain-helicase-DNA-binding protein 9 OS=Homo sapiens OX=9606 GN=CHD9 PE=1 SV=2	#CEEDIDQILLR	NA	1	NA	2.28	NA	2.28	NA	NA
Q13322	223	GRB10	GRB10_C223	GRB10_HUMAN Growth factor receptor-bound protein 10 OS=Homo sapiens OX=9606 GN=GRB10 PE=1 SV=2	#CLEDHELVVQ	#CLEDHELVVQ	1	3	2.15	2.4	2.275	0.176777	7.7704
Q9BSH4	256	TACO1	TACO1_C256	TACO1_HUMAN Translational activator of cytochrome c oxidase 1 OS=Homo sapiens OX=9606 GN=TACO1 PE=1 SV=1	NA	#CALEFIPNSK	NA	2	NA	2.27	2.27	NA	NA
P42224	155	STAT1	STAT1_C155	STAT1_HUMAN Signal transducer and activator of transcription 1-alpha/beta OS=Homo sapiens OX=9606 GN=STAT1 PE=1 SV=2	#CIEHEIK	NA	2	NA	2.255	NA	2.255	NA	NA
Q9NPA3	5	MID1IP1	MID1IP1_C5	M1IP1_HUMAN Mid1-interacting protein 1 OS=Homo sapiens OX=9606 GN=MID1IP1 PE=1 SV=1	#CDTYNQK	NA	2	NA	2.245	NA	2.245	NA	NA
Q13263	221	TRIM28	TRIM28_C221	TIF1B_HUMAN Transcription intermediary factor 1-beta OS=Homo sapiens OX=9606 GN=TRIM28 PE=1 SV=5	#CESCDTLTCR	NA	1	NA	2.22	NA	2.22	NA	NA
P13489	134	RNH1	RNH1_C134	RINI_HUMAN Ribonuclease inhibitor OS=Homo sapiens OX=9606 GN=RNH1 PE=1 SV=2	#CEGLLDPQCR	NA	1	NA	2.21	NA	2.21	NA	NA
Q9BQE5	166	APOL2	APOL2_C166	APOL2_HUMAN Apolipoprotein L2 OS=Homo sapiens OX=9606 GN=APOL2 PE=1 SV=1	#CSVVELVNK	NA	1	NA	2.2	NA	2.2	NA	NA
Q63ZY6	124	NSUN5P2	NSUN5P2_C124	NSN5C_HUMAN Putative methyltransferase NSUN5C OS=Homo sapiens OX=9606 GN=NSUN5P2 PE=5 SV=2	#CSGSGMPSR	NA	1	NA	2.2	NA	2.2	NA	NA
P42166	561	TMPO	TMPO_C561	LAP2A_HUMAN Lamina-associated polypeptide 2, isoform alpha OS=Homo sapiens OX=9606 GN=TMPO PE=1 SV=2	#CNQQLDLALCR	#CNQQLDLALCR	1	1	2.31	2.08	2.195	0.162635	7.40932
P16885	624	PLCG2	PLCG2_C624	PLCG2_HUMAN 1-phosphatidylinositol 4,5-bisphosphate phosphodiesterase gamma-2 OS=Homo sapiens OX=9606 GN=PLCG2 PE=1 SV=4	#CAEFELR	NA	1	NA	2.18	NA	2.18	NA	NA
P48147	255	PREP	PREP_C255	PPCE_HUMAN Prolyl endopeptidase OS=Homo sapiens OX=9606 GN=PREP PE=1 SV=2	#CDPVNR	NA	1	NA	2.18	NA	2.18	NA	NA
Q8IXT5	204	RBM12B	RBM12B_C204	RB12B_HUMAN RNA-binding protein 12B OS=Homo sapiens OX=9606 GN=RBM12B PE=1 SV=2	#CVDASGGLK	#CVDASGGLK	2	3	2.13	2.22	2.175	0.0636396	2.92596
P49588	773	AARS	AARS_C773	SYAC_HUMAN Alanine--tRNA ligase, cytoplasmic OS=Homo sapiens OX=9606 GN=AARS PE=1 SV=2	#CLSVMEAK	#CLSVMEAK	6	7	2.16	2.15	2.155	0.00707107	0.328124
P21980	370	TGM2	TGM2_C370	TGM2_HUMAN Protein-glutamine gamma-glutamyltransferase 2 OS=Homo sapiens OX=9606 GN=TGM2 PE=1 SV=2	#CCGPVPVR	#CCGPVPVR	2	3	2.16	2.13	2.145	0.0212132	0.988961
P53611	40	RABGGTB	RABGGTB_C40	PGTB2_HUMAN Geranylgeranyl transferase type-2 subunit beta OS=Homo sapiens OX=9606 GN=RABGGTB PE=1 SV=2	#CMSEYLR	NA	1	NA	2.14	NA	2.14	NA	NA
Q9H4A4	123	RNPEP	RNPEP_C123	AMPB_HUMAN Aminopeptidase B OS=Homo sapiens OX=9606 GN=RNPEP PE=1 SV=2	#CVSFPQPCR	NA	1	NA	2.14	NA	2.14	NA	NA
P62979	149	RPS27A	RPS27A_C149	RS27A_HUMAN Ubiquitin-40S ribosomal protein S27a OS=Homo sapiens OX=9606 GN=RPS27A PE=1 SV=2	#CFNKPEDK	#CFNKPEDK	5	1	2.14	2.07	2.105	0.0494975	2.35142
O00401	61	WASL	WASL_C61	WASL_HUMAN Neural Wiskott-Aldrich syndrome protein OS=Homo sapiens OX=9606 GN=WASL PE=1 SV=2	#CSGVACLVK	NA	1	NA	2.1	NA	2.1	NA	NA
O43432	301	EIF4G3	EIF4G3_C301	IF4G3_HUMAN Eukaryotic translation initiation factor 4 gamma 3 OS=Homo sapiens OX=9606 GN=EIF4G3 PE=1 SV=2	#CELSSPR	NA	1	NA	2.09	NA	2.09	NA	NA
Q8WV74	5	NUDT8	NUDT8_C5	NUDT8_HUMAN Nucleoside diphosphate-linked moiety X motif 8 OS=Homo sapiens OX=9606 GN=NUDT8 PE=1 SV=2	#CLSAEGELR	NA	1	NA	2.09	NA	2.09	NA	NA
P49841	199	GSK3B	GSK3B_C199	GSK3B_HUMAN Glycogen synthase kinase-3 beta OS=Homo sapiens OX=9606 GN=GSK3B PE=1 SV=2	NA	#CDFGSAK	NA	2	NA	2.09	2.09	NA	NA
Q16831	71	UPP1	UPP1_C71	UPP1_HUMAN Uridine phosphorylase 1 OS=Homo sapiens OX=9606 GN=UPP1 PE=1 SV=1	NA	#CVGAELGLDCPGR	NA	2	NA	2.07	2.07	NA	NA
Q92890	185	UFD1	UFD1_C185	UFD1_HUMAN Ubiquitin recognition factor in ER-associated degradation protein 1 OS=Homo sapiens OX=9606 GN=UFD1 PE=1 SV=3	#CDMNVDFDAPLGYK	NA	2	NA	2.06	NA	2.06	NA	NA
O95415	25	BRI3	BRI3_C25	BRI3_HUMAN Brain protein I3 OS=Homo sapiens OX=9606 GN=BRI3 PE=1 SV=1	#CGPHGY	#CGPHGY	1	1	1.89	2.22	2.055	0.233345	11.355
Q8NFJ5	284	GPRC5A	GPRC5A_C284	RAI3_HUMAN Retinoic acid-induced protein 3 OS=Homo sapiens OX=9606 GN=GPRC5A PE=1 SV=2	#CKPQLVK	#CKPQLVK	3	2	1.66	2.45	2.055	0.558614	27.1832
Q92616	648	GCN1	GCN1_C648	GCN1_HUMAN eIF-2-alpha kinase activator GCN1 OS=Homo sapiens OX=9606 GN=GCN1 PE=1 SV=6	#CVISGVPGLK	#CVISGVPGLK	2	2	1.96	2.13	2.045	0.120208	5.87815
Q99541	302	PLIN2	PLIN2_C302	PLIN2_HUMAN Perilipin-2 OS=Homo sapiens OX=9606 GN=PLIN2 PE=1 SV=2	#CAEHIESR	NA	1	NA	2.04	NA	2.04	NA	NA
Q99504	56	EYA3	EYA3_C56	EYA3_HUMAN Eyes absent homolog 3 OS=Homo sapiens OX=9606 GN=EYA3 PE=1 SV=3	#CTDYIPR	NA	1	NA	2.03	NA	2.03	NA	NA
P61160	221	ACTR2	ACTR2_C221	ARP2_HUMAN Actin-related protein 2 OS=Homo sapiens OX=9606 GN=ACTR2 PE=1 SV=1	NA	#CYVGYNIEQEQK	NA	2	NA	2.02	2.02	NA	NA
Q15233	145	NONO	NONO_C145	NONO_HUMAN Non-POU domain-containing octamer-binding protein OS=Homo sapiens OX=9606 GN=NONO PE=1 SV=4	#CHSASLTVR	#CHSASLTVR	2	2	2.125	1.895	2.01	0.162635	8.09127
Q9UJW0	258	DCTN4	DCTN4_C258	DCTN4_HUMAN Dynactin subunit 4 OS=Homo sapiens OX=9606 GN=DCTN4 PE=1 SV=1	NA	#CASQLYPR	NA	2	NA	2.01	2.01	NA	NA
Q9BWH6	185	RPAP1	RPAP1_C185	RPAP1_HUMAN RNA polymerase II-associated protein 1 OS=Homo sapiens OX=9606 GN=RPAP1 PE=1 SV=3	#CETPTPR	#CETPTPR	1	1	1.62	2.38	2	0.537401	26.8701
Q14690	1218	PDCD11	PDCD11_C1218	RRP5_HUMAN Protein RRP5 homolog OS=Homo sapiens OX=9606 GN=PDCD11 PE=1 SV=3	#CLSLTGPHK	NA	1	NA	1.99	NA	1.99	NA	NA
Q7L2E3	346	DHX30	DHX30_C346	DHX30_HUMAN ATP-dependent RNA helicase DHX30 OS=Homo sapiens OX=9606 GN=DHX30 PE=1 SV=1	NA	#CTIQVPEPILR	NA	2	NA	1.99	1.99	NA	NA
Q8TDH9	12	BLOC1S5	BLOC1S5_C12	BL1S5_HUMAN Biogenesis of lysosome-related organelles complex 1 subunit 5 OS=Homo sapiens OX=9606 GN=BLOC1S5 PE=1 SV=1	NA	#CEAAPGGGSK	NA	1	NA	1.99	1.99	NA	NA
P60660	2	MYL6	MYL6_C2	MYL6_HUMAN Myosin light polypeptide 6 OS=Homo sapiens OX=9606 GN=MYL6 PE=1 SV=2	#CDFTEDQTAEFK	#CDFTEDQTAEFK	5	5	2.07	1.89	1.98	0.127279	6.42824
Q9UJY1	10	HSPB8	HSPB8_C10	HSPB8_HUMAN Heat shock protein beta-8 OS=Homo sapiens OX=9606 GN=HSPB8 PE=1 SV=1	NA	#CHYPSR	NA	1	NA	1.98	1.98	NA	NA
Q9NVI1	594	FANCI	FANCI_C594	FANCI_HUMAN Fanconi anemia group I protein OS=Homo sapiens OX=9606 GN=FANCI PE=1 SV=4	#CLSQQADVR	NA	1	NA	1.97	NA	1.97	NA	NA
Q16512	317	PKN1	PKN1_C317	PKN1_HUMAN Serine/threonine-protein kinase N1 OS=Homo sapiens OX=9606 GN=PKN1 PE=1 SV=2	NA	#CKPAPLTGTLEVR	NA	3	NA	1.96	1.96	NA	NA
Q9Y5B0	201	CTDP1	CTDP1_C201	CTDP1_HUMAN RNA polymerase II subunit A C-terminal domain phosphatase OS=Homo sapiens OX=9606 GN=CTDP1 PE=1 SV=3	NA	#CQQMSNK	NA	1	NA	1.95	1.95	NA	NA
A5YKK6	624	CNOT1	CNOT1_C624	CNOT1_HUMAN CCR4-NOT transcription complex subunit 1 OS=Homo sapiens OX=9606 GN=CNOT1 PE=1 SV=2	#CPSILGGLAPEKDQPK #CPSILGGLAPEK	#CPSILGGLAPEK	3	2	1.87	2.02	1.945	0.106066	5.45327
Q86UP2	303	KTN1	KTN1_C303	KTN1_HUMAN Kinectin OS=Homo sapiens OX=9606 GN=KTN1 PE=1 SV=1	#CVVDLLK	NA	2	NA	1.94	NA	1.94	NA	NA
Q92616	1535	GCN1	GCN1_C1535	GCN1_HUMAN eIF-2-alpha kinase activator GCN1 OS=Homo sapiens OX=9606 GN=GCN1 PE=1 SV=6	#CLPNIVPK	#CLPNIVPK	1	1	2.02	1.83	1.925	0.13435	6.97924
P40818	809	USP8	USP8_C809	UBP8_HUMAN Ubiquitin carboxyl-terminal hydrolase 8 OS=Homo sapiens OX=9606 GN=USP8 PE=1 SV=1	#CYQDDINR	NA	2	NA	1.92	NA	1.92	NA	NA
Q03518	239	TAP1	TAP1_C239	TAP1_HUMAN Antigen peptide transporter 1 OS=Homo sapiens OX=9606 GN=TAP1 PE=1 SV=2	#CLGSETR	#CLGSETR	1	1	2.06	1.77	1.915	0.205061	10.7081
Q8NCG7	260	DAGLB	DAGLB_C260	DGLB_HUMAN Sn1-specific diacylglycerol lipase beta OS=Homo sapiens OX=9606 GN=DAGLB PE=1 SV=2	NA	#CHAPGSSQ	NA	1	NA	1.91	1.91	NA	NA
O75410	715	TACC1	TACC1_C715	TACC1_HUMAN Transforming acidic coiled-coil-containing protein 1 OS=Homo sapiens OX=9606 GN=TACC1 PE=1 SV=2	NA	#CAQDYLAR	NA	2	NA	1.9	1.9	NA	NA
Q9UBX3	240	SLC25A10	SLC25A10_C240	DIC_HUMAN Mitochondrial dicarboxylate carrier OS=Homo sapiens OX=9606 GN=SLC25A10 PE=1 SV=2	NA	#CAVETAK	NA	2	NA	1.9	1.9	NA	NA
Q13332	1501	PTPRS	PTPRS_C1501	PTPRS_HUMAN Receptor-type tyrosine-protein phosphatase S OS=Homo sapiens OX=9606 GN=PTPRS PE=1 SV=3	#CDQYWPNR	#CDQYWPNR	1	2	2.38	1.38	1.88	0.707107	37.6121
Q9BQ39	417	DDX50	DDX50_C417	DDX50_HUMAN ATP-dependent RNA helicase DDX50 OS=Homo sapiens OX=9606 GN=DDX50 PE=1 SV=1	#CLHGDIAQSQ	NA	1	NA	1.88	NA	1.88	NA	NA
Q9P2I0	294	CPSF2	CPSF2_C294	CPSF2_HUMAN Cleavage and polyadenylation specificity factor subunit 2 OS=Homo sapiens OX=9606 GN=CPSF2 PE=1 SV=2	NA	#CFEDKR	NA	1	NA	1.88	1.88	NA	NA
P52597	267	HNRNPF	HNRNPF_C267	HNRPF_HUMAN Heterogeneous nuclear ribonucleoprotein F OS=Homo sapiens OX=9606 GN=HNRNPF PE=1 SV=3	#CLSGMYDHR	#CLSGMYDHR	3	1	1.75	2	1.875	0.176777	9.42809
Q06136	245	KDSR	KDSR_C245	KDSR_HUMAN 3-ketodihydrosphingosine reductase OS=Homo sapiens OX=9606 GN=KDSR PE=1 SV=1	NA	#CKPEQVAK	NA	1	NA	1.87	1.87	NA	NA
Q15003	296	NCAPH	NCAPH_C296	CND2_HUMAN Condensin complex subunit 2 OS=Homo sapiens OX=9606 GN=NCAPH PE=1 SV=3	#CVEMTDLK	NA	1	NA	1.86	NA	1.86	NA	NA
Q00341	940	HDLBP	HDLBP_C940	VIGLN_HUMAN Vigilin OS=Homo sapiens OX=9606 GN=HDLBP PE=1 SV=2	#CDPGSPR	NA	1	NA	1.86	NA	1.86	NA	NA
P22681	353	CBL	CBL_C353	CBL_HUMAN E3 ubiquitin-protein ligase CBL OS=Homo sapiens OX=9606 GN=CBL PE=1 SV=2	#CEPTPQDHIK	NA	3	NA	1.86	NA	1.86	NA	NA
Q9NSK7	24	C19orf12	C19orf12_C24	CS012_HUMAN Protein C19orf12 OS=Homo sapiens OX=9606 GN=C19orf12 PE=1 SV=3	#CSLSGER	NA	1	NA	1.86	NA	1.86	NA	NA
Q86VR2	268	RETREG3	RETREG3_C268	RETR3_HUMAN Reticulophagy regulator 3 OS=Homo sapiens OX=9606 GN=RETREG3 PE=1 SV=1	#CPQLDDSTVAR	#CPQLDDSTVAR	1	2	1.92	1.795	1.8575	0.0883883	4.75846
Q13111	79	CHAF1A	CHAF1A_C79	CAF1A_HUMAN Chromatin assembly factor 1 subunit A OS=Homo sapiens OX=9606 GN=CHAF1A PE=1 SV=3	#CHVGSDIDFRPK	NA	1	NA	1.85	NA	1.85	NA	NA
Q13045	46	FLII	FLII_C46	FLII_HUMAN Protein flightless-1 homolog OS=Homo sapiens OX=9606 GN=FLII PE=1 SV=2	#CYLPEELAALQK	NA	1	NA	1.85	NA	1.85	NA	NA
Q96FZ2	131	HMCES	HMCES_C131	HMCES_HUMAN Abasic site processing protein HMCES OS=Homo sapiens OX=9606 GN=HMCES PE=1 SV=1	NA	#CQGTNQR	NA	1	NA	1.85	1.85	NA	NA
P52732	911	KIF11	KIF11_C911	KIF11_HUMAN Kinesin-like protein KIF11 OS=Homo sapiens OX=9606 GN=KIF11 PE=1 SV=2	#CFLEQDLK	#CFLEQDLK	1	2	1.51	2.18	1.845	0.473762	25.6781
Q9H1E5	326	TMX4	TMX4_C326	TMX4_HUMAN Thioredoxin-related transmembrane protein 4 OS=Homo sapiens OX=9606 GN=TMX4 PE=1 SV=1	#CPADTEVVEDSLR	NA	1	NA	1.84	NA	1.84	NA	NA
Q8TEK3	1075	DOT1L	DOT1L_C1075	DOT1L_HUMAN Histone-lysine N-methyltransferase, H3 lysine-79 specific OS=Homo sapiens OX=9606 GN=DOT1L PE=1 SV=3	#CVPSHGQDSR	NA	1	NA	1.84	NA	1.84	NA	NA
Q96LD4	115	TRIM47	TRIM47_C115	TRI47_HUMAN E3 ubiquitin-protein ligase TRIM47 OS=Homo sapiens OX=9606 GN=TRIM47 PE=1 SV=2	NA	#CAPEPWPAGEEPVR	NA	1	NA	1.84	1.84	NA	NA
Q96K49	422	TMEM87B	TMEM87B_C422	TM87B_HUMAN Transmembrane protein 87B OS=Homo sapiens OX=9606 GN=TMEM87B PE=1 SV=1	#CQSDWMER	NA	1	NA	1.83	NA	1.83	NA	NA
Q29865	25	HLA-C	HLA-C_C25	1C18_HUMAN HLA class I histocompatibility antigen, Cw-18 alpha chain OS=Homo sapiens OX=9606 GN=HLA-C PE=1 SV=1	NA	#CSHSMR	NA	2	NA	1.83	1.83	NA	NA
Q9BRR6	40	ADPGK	ADPGK_C40	ADPGK_HUMAN ADP-dependent glucokinase OS=Homo sapiens OX=9606 GN=ADPGK PE=1 SV=1	#CLGPAPAPPGPVSPEGR	#CLGPAPAPPGPVSPEGR	2	4	1.915	1.715	1.815	0.141421	7.79181
Q9NRQ2	136	PLSCR4	PLSCR4_C136	PLS4_HUMAN Phospholipid scramblase 4 OS=Homo sapiens OX=9606 GN=PLSCR4 PE=1 SV=2	#CFETNNR	NA	1	NA	1.81	NA	1.81	NA	NA
P00533	1146	EGFR	EGFR_C1146	EGFR_HUMAN Epidermal growth factor receptor OS=Homo sapiens OX=9606 GN=EGFR PE=1 SV=2	#CVNSTFDSPAH	NA	1	NA	1.81	NA	1.81	NA	NA
Q13148	244	TARDBP	TARDBP_C244	TADBP_HUMAN TAR DNA-binding protein 43 OS=Homo sapiens OX=9606 GN=TARDBP PE=1 SV=1	#CGEDLIIK	NA	1	NA	1.81	NA	1.81	NA	NA
Q5VST6	210	ABHD17B	ABHD17B_C210	AB17B_HUMAN Alpha/beta hydrolase domain-containing protein 17B OS=Homo sapiens OX=9606 GN=ABHD17B PE=1 SV=1	#CFDAFPNIDK	NA	1	NA	1.81	NA	1.81	NA	NA
Q05209	343	PTPN12	PTPN12_C343	PTN12_HUMAN Tyrosine-protein phosphatase non-receptor type 12 OS=Homo sapiens OX=9606 GN=PTPN12 PE=1 SV=3	#CLVEGDAK	#CLVEGDAK	2	1	1.65	1.97	1.81	0.226274	12.5013
Q6NUM9	534	RETSAT	RETSAT_C534	RETST_HUMAN All-trans-retinol 13,14-reductase OS=Homo sapiens OX=9606 GN=RETSAT PE=1 SV=2	#CYGADHDLGR	#CYGADHDLGR	2	2	1.53	2.09	1.81	0.39598	21.8773
Q00577	292	PURA	PURA_C292	PURA_HUMAN Transcriptional activator protein Pur-alpha OS=Homo sapiens OX=9606 GN=PURA PE=1 SV=2	#CEQLHQQ	NA	2	NA	1.8	NA	1.8	NA	NA
O75717	716	WDHD1	WDHD1_C716	WDHD1_HUMAN WD repeat and HMG-box DNA-binding protein 1 OS=Homo sapiens OX=9606 GN=WDHD1 PE=1 SV=1	#CQIATEK	NA	1	NA	1.8	NA	1.8	NA	NA
P31751	311	AKT2	AKT2_C311	AKT2_HUMAN RAC-beta serine/threonine-protein kinase OS=Homo sapiens OX=9606 GN=AKT2 PE=1 SV=2	#CGTPEYLAPEVLEDNDYGR	#CGTPEYLAPEVLEDNDYGR	2	2	1.79	1.8	1.795	0.00707107	0.393931
P35658	1003	NUP214	NUP214_C1003	NU214_HUMAN Nuclear pore complex protein Nup214 OS=Homo sapiens OX=9606 GN=NUP214 PE=1 SV=2	#CKDDEAVVQAPR	NA	2	NA	1.79	NA	1.79	NA	NA
Q9H9A5	633	CNOT10	CNOT10_C633	CNO10_HUMAN CCR4-NOT transcription complex subunit 10 OS=Homo sapiens OX=9606 GN=CNOT10 PE=1 SV=1	NA	#CYPSSVNSAR	NA	1	NA	1.79	1.79	NA	NA
O43592	877	XPOT	XPOT_C877	XPOT_HUMAN Exportin-T OS=Homo sapiens OX=9606 GN=XPOT PE=1 SV=2	#CFLAPLK	NA	2	NA	1.78	NA	1.78	NA	NA
Q92616	907	GCN1	GCN1_C907	GCN1_HUMAN eIF-2-alpha kinase activator GCN1 OS=Homo sapiens OX=9606 GN=GCN1 PE=1 SV=6	#CVMPSR	NA	1	NA	1.78	NA	1.78	NA	NA
Q9BQG0	1046	MYBBP1A	MYBBP1A_C1046	MBB1A_HUMAN Myb-binding protein 1A OS=Homo sapiens OX=9606 GN=MYBBP1A PE=1 SV=2	#CFEDPEWK	#CFEDPEWK	1	1	1.62	1.94	1.78	0.226274	12.712
Q6P2Q9	435	PRPF8	PRPF8_C435	PRP8_HUMAN Pre-mRNA-processing-splicing factor 8 OS=Homo sapiens OX=9606 GN=PRPF8 PE=1 SV=2	NA	#CPAGQPVK	NA	1	NA	1.78	1.78	NA	NA
P48163	415	ME1	ME1_C415	MAOX_HUMAN NADP-dependent malic enzyme OS=Homo sapiens OX=9606 GN=ME1 PE=1 SV=1	NA	#CSAEQCYK	NA	1	NA	1.78	1.78	NA	NA
Q9ULH0	747	KIDINS220	KIDINS220_C747	KDIS_HUMAN Kinase D-interacting substrate of 220 kDa OS=Homo sapiens OX=9606 GN=KIDINS220 PE=1 SV=3	NA	#CEVELMAR	NA	2	NA	1.775	1.775	NA	NA
Q8NCA5	126	FAM98A	FAM98A_C126	FA98A_HUMAN Protein FAM98A OS=Homo sapiens OX=9606 GN=FAM98A PE=1 SV=2	#CVNAPPK	NA	1	NA	1.77	NA	1.77	NA	NA
Q8N335	164	GPD1L	GPD1L_C164	GPD1L_HUMAN Glycerol-3-phosphate dehydrogenase 1-like protein OS=Homo sapiens OX=9606 GN=GPD1L PE=1 SV=1	#CETTIGSK	NA	1	NA	1.77	NA	1.77	NA	NA
Q96A49	283	SYAP1	SYAP1_C283	SYAP1_HUMAN Synapse-associated protein 1 OS=Homo sapiens OX=9606 GN=SYAP1 PE=1 SV=1	#CNLNQEDLR	#CNLNQEDLR	1	1	1.75	1.79	1.77	0.0282843	1.59798
Q6NUM9	106	RETSAT	RETSAT_C106	RETST_HUMAN All-trans-retinol 13,14-reductase OS=Homo sapiens OX=9606 GN=RETSAT PE=1 SV=2	NA	#CHTFGK	NA	1	NA	1.77	1.77	NA	NA
Q7Z434	46	MAVS	MAVS_C46	MAVS_HUMAN Mitochondrial antiviral-signaling protein OS=Homo sapiens OX=9606 GN=MAVS PE=1 SV=2	#CTLSGNR	NA	2	NA	1.765	NA	1.765	NA	NA
O14980	164	XPO1	XPO1_C164	XPO1_HUMAN Exportin-1 OS=Homo sapiens OX=9606 GN=XPO1 PE=1 SV=1	#CQNNMVILK	#CQNNMVILK	1	1	1.77	1.75	1.76	0.0141421	0.80353
O15382	342	BCAT2	BCAT2_C342	BCAT2_HUMAN Branched-chain-amino-acid aminotransferase, mitochondrial OS=Homo sapiens OX=9606 GN=BCAT2 PE=1 SV=2	#CQVCPVHR	#CQVCPVHR	1	2	1.83	1.69	1.76	0.0989949	5.62471
Q9BV86	195	NTMT1	NTMT1_C195	NTM1A_HUMAN N-terminal Xaa-Pro-Lys N-methyltransferase 1 OS=Homo sapiens OX=9606 GN=NTMT1 PE=1 SV=3	#CSAGLSLLAEER	NA	3	NA	1.75	NA	1.75	NA	NA
P42330	188	AKR1C3	AKR1C3_C188	AK1C3_HUMAN Aldo-keto reductase family 1 member C3 OS=Homo sapiens OX=9606 GN=AKR1C3 PE=1 SV=4	#CNQVECHPYFNR	#CNQVECHPYFNR	1	1	1.74	1.76	1.75	0.0141421	0.808122
Q96FX7	209	TRMT61A	TRMT61A_C209	TRM61_HUMAN tRNA (adenine(58)-N(1))-methyltransferase catalytic subunit TRMT61A OS=Homo sapiens OX=9606 GN=TRMT61A PE=1 SV=1	#CIEQVQR	#CIEQVQR	2	1	1.64	1.86	1.75	0.155563	8.88934
Q9P2E9	892	RRBP1	RRBP1_C892	RRBP1_HUMAN Ribosome-binding protein 1 OS=Homo sapiens OX=9606 GN=RRBP1 PE=1 SV=5	NA	#CHTQSSHA	NA	1	NA	1.75	1.75	NA	NA
Q9BW92	453	TARS2	TARS2_C453	SYTM_HUMAN Threonine--tRNA ligase, mitochondrial OS=Homo sapiens OX=9606 GN=TARS2 PE=1 SV=1	NA	#CFQQDDAHIF	NA	1	NA	1.75	1.75	NA	NA
P56134	7	ATP5MF	ATP5MF_C7	ATPK_HUMAN ATP synthase subunit f, mitochondrial OS=Homo sapiens OX=9606 GN=ATP5MF PE=1 SV=3	NA	#CPAPVPVK	NA	2	NA	1.74	1.74	NA	NA
Q92538	1766	GBF1	GBF1_C1766	GBF1_HUMAN Golgi-specific brefeldin A-resistance guanine nucleotide exchange factor 1 OS=Homo sapiens OX=9606 GN=GBF1 PE=1 SV=2	#CDFEKPESPR	NA	1	NA	1.73	NA	1.73	NA	NA
P35270	159	SPR	SPR_C159	SPRE_HUMAN Sepiapterin reductase OS=Homo sapiens OX=9606 GN=SPR PE=1 SV=1	#CALQPFK	NA	2	NA	1.73	NA	1.73	NA	NA
Q9BQS8	293	FYCO1	FYCO1_C293	FYCO1_HUMAN FYVE and coiled-coil domain-containing protein 1 OS=Homo sapiens OX=9606 GN=FYCO1 PE=1 SV=3	#CLVAELQK	NA	2	NA	1.73	NA	1.73	NA	NA
Q70EK9	680	USP51	USP51_C680	UBP51_HUMAN Ubiquitin carboxyl-terminal hydrolase 51 OS=Homo sapiens OX=9606 GN=USP51 PE=1 SV=1	NA	#CDDAIITK	NA	1	NA	1.73	1.73	NA	NA
Q07866	114	KLC1	KLC1_C114	KLC1_HUMAN Kinesin light chain 1 OS=Homo sapiens OX=9606 GN=KLC1 PE=1 SV=2	NA	#CQENQWLR	NA	1	NA	1.73	1.73	NA	NA
P21333	1157	FLNA	FLNA_C1157	FLNA_HUMAN Filamin-A OS=Homo sapiens OX=9606 GN=FLNA PE=1 SV=4	#CFDASK	#CFDASK	2	1	1.45	2	1.725	0.388909	22.5454
Q15185	58	PTGES3	PTGES3_C58	TEBP_HUMAN Prostaglandin E synthase 3 OS=Homo sapiens OX=9606 GN=PTGES3 PE=1 SV=1	#CIDPNDSK	#CIDPNDSK	2	2	1.725	1.72	1.7225	0.00353553	0.205256
P15924	2259	DSP	DSP_C2259	DESP_HUMAN Desmoplakin OS=Homo sapiens OX=9606 GN=DSP PE=1 SV=3	#CIAGIYNETTK	NA	1	NA	1.72	NA	1.72	NA	NA
O95361	154	TRIM16	TRIM16_C154	TRI16_HUMAN Tripartite motif-containing protein 16 OS=Homo sapiens OX=9606 GN=TRIM16 PE=1 SV=3	NA	#CQEHSGHTIVSL	NA	1	NA	1.72	1.72	NA	NA
Q9NYL9	231	TMOD3	TMOD3_C231	TMOD3_HUMAN Tropomodulin-3 OS=Homo sapiens OX=9606 GN=TMOD3 PE=1 SV=1	NA	#CFSLAATR	NA	1	NA	1.72	1.72	NA	NA
Q00765	18	REEP5	REEP5_C18	REEP5_HUMAN Receptor expression-enhancing protein 5 OS=Homo sapiens OX=9606 GN=REEP5 PE=1 SV=3	#CMTDLLAK	#CMTDLLAK	6	5	1.76	1.67	1.715	0.0636396	3.71076
Q8WVT3	118	TRAPPC12	TRAPPC12_C118	TPC12_HUMAN Trafficking protein particle complex subunit 12 OS=Homo sapiens OX=9606 GN=TRAPPC12 PE=1 SV=3	#CAPEDAAPSSGGAPR	#CAPEDAAPSSGGAPR	4	2	1.77	1.66	1.715	0.0777817	4.53538
Q92973	613	TNPO1	TNPO1_C613	TNPO1_HUMAN Transportin-1 OS=Homo sapiens OX=9606 GN=TNPO1 PE=1 SV=2	#CEPVYQR	#CEPVYQR	2	2	1.88	1.55	1.715	0.233345	13.6061
Q12789	1681	GTF3C1	GTF3C1_C1681	TF3C1_HUMAN General transcription factor 3C polypeptide 1 OS=Homo sapiens OX=9606 GN=GTF3C1 PE=1 SV=4	#CTPVPAR	NA	1	NA	1.71	NA	1.71	NA	NA
Q9UPQ8	99	DOLK	DOLK_C99	DOLK_HUMAN Dolichol kinase OS=Homo sapiens OX=9606 GN=DOLK PE=1 SV=1	NA	#CQTAGNPFFER	NA	1	NA	1.71	1.71	NA	NA
Q9UHB9	562	SRP68	SRP68_C562	SRP68_HUMAN Signal recognition particle subunit SRP68 OS=Homo sapiens OX=9606 GN=SRP68 PE=1 SV=2	#CLDPSLVTK	#CLDPSLVTK	2	2	1.82	1.595	1.7075	0.159099	9.31766
Q9NZU5	58	LMCD1	LMCD1_C58	LMCD1_HUMAN LIM and cysteine-rich domains protein 1 OS=Homo sapiens OX=9606 GN=LMCD1 PE=1 SV=1	#CLTSDLEDDRK	#CLTSDLEDDRK	2	1	1.695	1.71	1.7025	0.0106066	0.623002
Q53EP0	658	FNDC3B	FNDC3B_C658	FND3B_HUMAN Fibronectin type III domain-containing protein 3B OS=Homo sapiens OX=9606 GN=FNDC3B PE=1 SV=2	#CSESLPVR	NA	1	NA	1.7	NA	1.7	NA	NA
Q15334	505	LLGL1	LLGL1_C505	L2GL1_HUMAN Lethal(2) giant larvae protein homolog 1 OS=Homo sapiens OX=9606 GN=LLGL1 PE=1 SV=3	#CFDPYSDDPR	NA	1	NA	1.7	NA	1.7	NA	NA
P14314	77	PRKCSH	PRKCSH_C77	GLU2B_HUMAN Glucosidase 2 subunit beta OS=Homo sapiens OX=9606 GN=PRKCSH PE=1 SV=2	NA	#CTNTGYKPL	NA	1	NA	1.7	1.7	NA	NA
Q13085	701	ACACA	ACACA_C701	ACACA_HUMAN Acetyl-CoA carboxylase 1 OS=Homo sapiens OX=9606 GN=ACACA PE=1 SV=2	NA	#CVEVDVHR	NA	1	NA	1.69	1.69	NA	NA
Q9BV68	15	RNF126	RNF126_C15	RN126_HUMAN E3 ubiquitin-protein ligase RNF126 OS=Homo sapiens OX=9606 GN=RNF126 PE=1 SV=2	NA	#CCSVEIVPR	NA	1	NA	1.69	1.69	NA	NA
O43156	940	TTI1	TTI1_C940	TTI1_HUMAN TELO2-interacting protein 1 homolog OS=Homo sapiens OX=9606 GN=TTI1 PE=1 SV=3	NA	#CGDFLR	NA	2	NA	1.69	1.69	NA	NA
Q9UL36	95	ZNF236	ZNF236_C95	ZN236_HUMAN Zinc finger protein 236 OS=Homo sapiens OX=9606 GN=ZNF236 PE=2 SV=2	NA	#CPVCNK	NA	1	NA	1.69	1.69	NA	NA
Q6L8Q7	119	PDE12	PDE12_C119	PDE12_HUMAN 2',5'-phosphodiesterase 12 OS=Homo sapiens OX=9606 GN=PDE12 PE=1 SV=2	#CEPVVK	NA	2	NA	1.685	NA	1.685	NA	NA
Q9Y4W2	306	LAS1L	LAS1L_C306	LAS1L_HUMAN Ribosomal biogenesis protein LAS1L OS=Homo sapiens OX=9606 GN=LAS1L PE=1 SV=2	#CVLAELK	#CVLAELK	1	1	1.55	1.82	1.685	0.190919	11.3305
Q15149	4494	PLEC	PLEC_C4494	PLEC_HUMAN Plectin OS=Homo sapiens OX=9606 GN=PLEC PE=1 SV=3	#CGFEDPR	NA	1	NA	1.68	NA	1.68	NA	NA
Q14839	1594	CHD4	CHD4_C1594	CHD4_HUMAN Chromodomain-helicase-DNA-binding protein 4 OS=Homo sapiens OX=9606 GN=CHD4 PE=1 SV=2	NA	#CTQAPAPASEDEK	NA	1	NA	1.68	1.68	NA	NA
Q66K74	975	MAP1S	MAP1S_C975	MAP1S_HUMAN Microtubule-associated protein 1S OS=Homo sapiens OX=9606 GN=MAP1S PE=1 SV=2	#CYVISGQDQR	NA	1	NA	1.67	NA	1.67	NA	NA
Q9H425	73	C1orf198	C1orf198_C73	CA198_HUMAN Uncharacterized protein C1orf198 OS=Homo sapiens OX=9606 GN=C1orf198 PE=1 SV=1	#CLVGPR	#CLVGPR	1	1	1.72	1.6	1.66	0.0848528	5.11162
P22692	215	IGFBP4	IGFBP4_C215	IBP4_HUMAN Insulin-like growth factor-binding protein 4 OS=Homo sapiens OX=9606 GN=IGFBP4 PE=1 SV=2	#CHPALDGQR	NA	1	NA	1.66	NA	1.66	NA	NA
Q9NP73	86	ALG13	ALG13_C86	ALG13_HUMAN Putative bifunctional UDP-N-acetylglucosamine transferase and deubiquitinase ALG13 OS=Homo sapiens OX=9606 GN=ALG13 PE=1 SV=2	NA	#CLETLEK	NA	2	NA	1.66	1.66	NA	NA
P30838	244	ALDH3A1	ALDH3A1_C244	AL3A1_HUMAN Aldehyde dehydrogenase, dimeric NADP-preferring OS=Homo sapiens OX=9606 GN=ALDH3A1 PE=1 SV=3	#CVAPDYILCDPSIQNQIVEK	#CVAPDYILCDPSIQNQIVEK	1	1	1.66	1.64	1.65	0.0141421	0.857099
O00469	697	PLOD2	PLOD2_C697	PLOD2_HUMAN Procollagen-lysine,2-oxoglutarate 5-dioxygenase 2 OS=Homo sapiens OX=9606 GN=PLOD2 PE=1 SV=2	#CSIESPR	NA	1	NA	1.65	NA	1.65	NA	NA
Q9BTX1	468	NDC1	NDC1_C468	NDC1_HUMAN Nucleoporin NDC1 OS=Homo sapiens OX=9606 GN=NDC1 PE=1 SV=2	NA	#CYGSPQSPQLIR	NA	2	NA	1.65	1.65	NA	NA
P35579	172	MYH9	MYH9_C172	MYH9_HUMAN Myosin-9 OS=Homo sapiens OX=9606 GN=MYH9 PE=1 SV=4	NA	#CTGESGAGK	NA	2	NA	1.65	1.65	NA	NA
Q9Y224	19	RTRAF	RTRAF_C19	RTRAF_HUMAN RNA transcription, translation and transport factor protein OS=Homo sapiens OX=9606 GN=RTRAF PE=1 SV=1	NA	#CKDETEFR	NA	1	NA	1.65	1.65	NA	NA
Q8WUM9	264	SLC20A1	SLC20A1_C264	S20A1_HUMAN Sodium-dependent phosphate transporter 1 OS=Homo sapiens OX=9606 GN=SLC20A1 PE=1 SV=1	#CSPSESPLMEK	#CSPSESPLMEK	1	2	1.62	1.67	1.645	0.0353553	2.14926
P55060	272	CSE1L	CSE1L_C272	XPO2_HUMAN Exportin-2 OS=Homo sapiens OX=9606 GN=CSE1L PE=1 SV=3	NA	#CDNAALYAQK	NA	2	NA	1.64	1.64	NA	NA
O75044	357	SRGAP2	SRGAP2_C357	SRGP2_HUMAN SLIT-ROBO Rho GTPase-activating protein 2 OS=Homo sapiens OX=9606 GN=SRGAP2 PE=1 SV=3	NA	#CAQQPVQSELVQR	NA	3	NA	1.64	1.64	NA	NA
Q9UPQ3	417	AGAP1	AGAP1_C417	AGAP1_HUMAN Arf-GAP with GTPase, ANK repeat and PH domain-containing protein 1 OS=Homo sapiens OX=9606 GN=AGAP1 PE=1 SV=4	NA	#CAPISSPK	NA	1	NA	1.64	1.64	NA	NA
Q99460	365	PSMD1	PSMD1_C365	PSMD1_HUMAN 26S proteasome non-ATPase regulatory subunit 1 OS=Homo sapiens OX=9606 GN=PSMD1 PE=1 SV=2	#CHTATVIAN	#CHTATVIAN	1	1	1.45	1.82	1.635	0.26163	16.0018
Q9Y5L0	125	TNPO3	TNPO3_C125	TNPO3_HUMAN Transportin-3 OS=Homo sapiens OX=9606 GN=TNPO3 PE=1 SV=3	#CVQTLVEK	#CVQTLVEK	1	1	1.77	1.49	1.63	0.19799	12.1466
Q9P265	1019	DIP2B	DIP2B_C1019	DIP2B_HUMAN Disco-interacting protein 2 homolog B OS=Homo sapiens OX=9606 GN=DIP2B PE=1 SV=3	#CTASCLQLHK	NA	1	NA	1.63	NA	1.63	NA	NA
Q96RN5	588	MED15	MED15_C588	MED15_HUMAN Mediator of RNA polymerase II transcription subunit 15 OS=Homo sapiens OX=9606 GN=MED15 PE=1 SV=2	#CEIALEK	NA	2	NA	1.63	NA	1.63	NA	NA
P78527	1904	PRKDC	PRKDC_C1904	PRKDC_HUMAN DNA-dependent protein kinase catalytic subunit OS=Homo sapiens OX=9606 GN=PRKDC PE=1 SV=3	#CITEGNELTK	NA	4	NA	1.62	NA	1.62	NA	NA
O15056	1182	SYNJ2	SYNJ2_C1182	SYNJ2_HUMAN Synaptojanin-2 OS=Homo sapiens OX=9606 GN=SYNJ2 PE=1 SV=3	#CLLEAR	NA	1	NA	1.62	NA	1.62	NA	NA
Q8WVV4	182	POF1B	POF1B_C182	POF1B_HUMAN Protein POF1B OS=Homo sapiens OX=9606 GN=POF1B PE=1 SV=3	#CHPQAQ	NA	1	NA	1.62	NA	1.62	NA	NA
P53618	684	COPB1	COPB1_C684	COPB_HUMAN Coatomer subunit beta OS=Homo sapiens OX=9606 GN=COPB1 PE=1 SV=3	NA	#CKEDQFQLSLL	NA	1	NA	1.62	1.62	NA	NA
Q16555	504	DPYSL2	DPYSL2_C504	DPYL2_HUMAN Dihydropyrimidinase-related protein 2 OS=Homo sapiens OX=9606 GN=DPYSL2 PE=1 SV=1	#CEVSVTPK	#CEVSVTPK	2	1	1.18	2.05	1.615	0.615183	38.0918
Q9UJX3	131	ANAPC7	ANAPC7_C131	APC7_HUMAN Anaphase-promoting complex subunit 7 OS=Homo sapiens OX=9606 GN=ANAPC7 PE=1 SV=4	NA	#CLPSEIEVK	NA	1	NA	1.61	1.61	NA	NA
P15924	646	DSP	DSP_C646	DESP_HUMAN Desmoplakin OS=Homo sapiens OX=9606 GN=DSP PE=1 SV=3	NA	#CQDVNHNK	NA	1	NA	1.61	1.61	NA	NA
Q6P2E9	1261	EDC4	EDC4_C1261	EDC4_HUMAN Enhancer of mRNA-decapping protein 4 OS=Homo sapiens OX=9606 GN=EDC4 PE=1 SV=1	NA	#CQAQQAH	NA	2	NA	1.61	1.61	NA	NA
Q92968	220	PEX13	PEX13_C220	PEX13_HUMAN Peroxisomal membrane protein PEX13 OS=Homo sapiens OX=9606 GN=PEX13 PE=1 SV=2	#CLGAEDR	#CLGAEDR	1	1	1.46	1.76	1.61	0.212132	13.1759
O60256	3	PRPSAP2	PRPSAP2_C3	KPRB_HUMAN Phosphoribosyl pyrophosphate synthase-associated protein 2 OS=Homo sapiens OX=9606 GN=PRPSAP2 PE=1 SV=1	#CVTPPELETK	#CVTPPELETK	1	4	1.64	1.57	1.605	0.0494975	3.08395
Q08J23	758	NSUN2	NSUN2_C758	NSUN2_HUMAN tRNA (cytosine(34)-C(5))-methyltransferase OS=Homo sapiens OX=9606 GN=NSUN2 PE=1 SV=2	#CDPAGVHPPR	#CDPAGVHPPR	9	3	1.95	1.26	1.605	0.487904	30.399
P30536	19	TSPO	TSPO_C19	TSPO_HUMAN Translocator protein OS=Homo sapiens OX=9606 GN=TSPO PE=1 SV=3	#CFVGSR	NA	1	NA	1.6	NA	1.6	NA	NA
Q92692	446	NECTIN2	NECTIN2_C446	NECT2_HUMAN Nectin-2 OS=Homo sapiens OX=9606 GN=NECTIN2 PE=1 SV=1	#CTEQEMPR	NA	1	NA	1.6	NA	1.6	NA	NA
Q8IVF2	405	AHNAK2	AHNAK2_C405	AHNK2_HUMAN Protein AHNAK2 OS=Homo sapiens OX=9606 GN=AHNAK2 PE=1 SV=2	#CEGTPQEGGLR	#CEGTPQEGGLR	2	2	1.58	1.62	1.6	0.0282843	1.76777
Q00653	57	NFKB2	NFKB2_C57	NFKB2_HUMAN Nuclear factor NF-kappa-B p100 subunit OS=Homo sapiens OX=9606 GN=NFKB2 PE=1 SV=4	#CEGPSHGGLPGAS #CEGPSHGGLPGASSEK	#CEGPSHGGLPGAS #CEGPSHGGLPGASSEK	3	3	1.51	1.69	1.6	0.127279	7.95495
P12270	224	TPR	TPR_C224	TPR_HUMAN Nucleoprotein TPR OS=Homo sapiens OX=9606 GN=TPR PE=1 SV=3	#CNLENK	#CNLENK	2	1	1.36	1.84	1.6	0.339411	21.2132
Q8TBC4	28	UBA3	UBA3_C28	UBA3_HUMAN NEDD8-activating enzyme E1 catalytic subunit OS=Homo sapiens OX=9606 GN=UBA3 PE=1 SV=2	#CGDTGDWEGR	NA	1	NA	1.59	NA	1.59	NA	NA
P23368	120	ME2	ME2_C120	MAOM_HUMAN NAD-dependent malic enzyme, mitochondrial OS=Homo sapiens OX=9606 GN=ME2 PE=1 SV=1	#CSQYGH	NA	1	NA	1.59	NA	1.59	NA	NA
O60841	749	EIF5B	EIF5B_C749	IF2P_HUMAN Eukaryotic translation initiation factor 5B OS=Homo sapiens OX=9606 GN=EIF5B PE=1 SV=4	NA	#CPFIVAL	NA	2	NA	1.59	1.59	NA	NA
P35579	1379	MYH9	MYH9_C1379	MYH9_HUMAN Myosin-9 OS=Homo sapiens OX=9606 GN=MYH9 PE=1 SV=4	#CLETAEEVKR	#CLETAEEVKR #CLETAEEVK	3	5	1.64	1.52	1.58	0.0848528	5.37043
O95336	32	PGLS	PGLS_C32	6PGL_HUMAN 6-phosphogluconolactonase OS=Homo sapiens OX=9606 GN=PGLS PE=1 SV=2	#CCLAGAR	NA	1	NA	1.58	NA	1.58	NA	NA
Q96PZ0	319	PUS7	PUS7_C319	PUS7_HUMAN Pseudouridylate synthase 7 homolog OS=Homo sapiens OX=9606 GN=PUS7 PE=1 SV=2	#CLMNFK	NA	1	NA	1.58	NA	1.58	NA	NA
P55884	420	EIF3B	EIF3B_C420	EIF3B_HUMAN Eukaryotic translation initiation factor 3 subunit B OS=Homo sapiens OX=9606 GN=EIF3B PE=1 SV=3	#CESSAHWPIFK	NA	3	NA	1.58	NA	1.58	NA	NA
Q5JTH9	102	RRP12	RRP12_C102	RRP12_HUMAN RRP12-like protein OS=Homo sapiens OX=9606 GN=RRP12 PE=1 SV=2	NA	#CTNVTFSK	NA	1	NA	1.58	1.58	NA	NA
P30153	390	PPP2R1A	PPP2R1A_C390	2AAA_HUMAN Serine/threonine-protein phosphatase 2A 65 kDa regulatory subunit A alpha isoform OS=Homo sapiens OX=9606 GN=PPP2R1A PE=1 SV=4	NA	#CVNEVIGIR	NA	2	NA	1.58	1.58	NA	NA
Q9Y4H2	802	IRS2	IRS2_C802	IRS2_HUMAN Insulin receptor substrate 2 OS=Homo sapiens OX=9606 GN=IRS2 PE=1 SV=2	#CYSSLPR	#CYSSLPR	2	1	1.35	1.8	1.575	0.318198	20.2031
P30876	1093	POLR2B	POLR2B_C1093	RPB2_HUMAN DNA-directed RNA polymerase II subunit RPB2 OS=Homo sapiens OX=9606 GN=POLR2B PE=1 SV=1	#CQIAHGAAQ	#CQIAHGAAQ	1	1	1.32	1.83	1.575	0.360624	22.8968
Q9BW60	93	ELOVL1	ELOVL1_C93	ELOV1_HUMAN Elongation of very long chain fatty acids protein 1 OS=Homo sapiens OX=9606 GN=ELOVL1 PE=1 SV=1	#CDPVDYSNSPEALR	#CDPVDYSNSPEALR	2	1	1.65	1.5	1.575	0.106066	6.73435
Q5VWZ2	12	LYPLAL1	LYPLAL1_C12	LYPL1_HUMAN Lysophospholipase-like protein 1 OS=Homo sapiens OX=9606 GN=LYPLAL1 PE=1 SV=3	#CIVSPAGR	#CIVSPAGR	2	3	1.78	1.36	1.57	0.296985	18.9162
Q9P2E9	933	RRBP1	RRBP1_C933	RRBP1_HUMAN Ribosome-binding protein 1 OS=Homo sapiens OX=9606 GN=RRBP1 PE=1 SV=5	#CEELSGLHGQ #CEELSGLHGQLQ	#CEELSGLHGQLQ	4	4	1.78	1.36	1.57	0.296985	18.9162
O95573	652	ACSL3	ACSL3_C652	ACSL3_HUMAN Long-chain-fatty-acid--CoA ligase 3 OS=Homo sapiens OX=9606 GN=ACSL3 PE=1 SV=3	#CEMENEVLK	NA	2	NA	1.57	NA	1.57	NA	NA
Q86YN1	7	DOLPP1	DOLPP1_C7	DOPP1_HUMAN Dolichyldiphosphatase 1 OS=Homo sapiens OX=9606 GN=DOLPP1 PE=2 SV=1	#CSLPASWR	NA	1	NA	1.57	NA	1.57	NA	NA
Q9BQG0	890	MYBBP1A	MYBBP1A_C890	MBB1A_HUMAN Myb-binding protein 1A OS=Homo sapiens OX=9606 GN=MYBBP1A PE=1 SV=2	#CHDLGER	NA	2	NA	1.57	NA	1.57	NA	NA
Q8WZA9	340	IRGQ	IRGQ_C340	IRGQ_HUMAN Immunity-related GTPase family Q protein OS=Homo sapiens OX=9606 GN=IRGQ PE=1 SV=1	#CLGEGK	NA	1	NA	1.57	NA	1.57	NA	NA
Q8TAG9	28	EXOC6	EXOC6_C28	EXOC6_HUMAN Exocyst complex component 6 OS=Homo sapiens OX=9606 GN=EXOC6 PE=1 SV=3	#CVGPTLR	#CVGPTLR	1	2	1.59	1.53	1.56	0.0424264	2.71964
O43823	139	AKAP8	AKAP8_C139	AKAP8_HUMAN A-kinase anchor protein 8 OS=Homo sapiens OX=9606 GN=AKAP8 PE=1 SV=1	#CLPEHNPYRPS	NA	1	NA	1.56	NA	1.56	NA	NA
Q9ULU4	623	ZMYND8	ZMYND8_C623	PKCB1_HUMAN Protein kinase C-binding protein 1 OS=Homo sapiens OX=9606 GN=ZMYND8 PE=1 SV=2	#CQMDKEPSAVK	NA	1	NA	1.56	NA	1.56	NA	NA
Q96KC8	380	DNAJC1	DNAJC1_C380	DNJC1_HUMAN DnaJ homolog subfamily C member 1 OS=Homo sapiens OX=9606 GN=DNAJC1 PE=1 SV=1	#CSPGMVR	NA	1	NA	1.56	NA	1.56	NA	NA
Q92621	698	NUP205	NUP205_C698	NU205_HUMAN Nuclear pore complex protein Nup205 OS=Homo sapiens OX=9606 GN=NUP205 PE=1 SV=3	NA	#CEEYPLTR	NA	2	NA	1.56	1.56	NA	NA
Q9UBP9	296	GULP1	GULP1_C296	GULP1_HUMAN PTB domain-containing engulfment adapter protein 1 OS=Homo sapiens OX=9606 GN=GULP1 PE=1 SV=1	NA	#CLDPLDSR	NA	1	NA	1.56	1.56	NA	NA
Q9H0S4	273	DDX47	DDX47_C273	DDX47_HUMAN Probable ATP-dependent RNA helicase DDX47 OS=Homo sapiens OX=9606 GN=DDX47 PE=1 SV=1	NA	#CNNTQR	NA	2	NA	1.56	1.56	NA	NA
Q71UM5	64	RPS27L	RPS27L_C64	RS27L_HUMAN 40S ribosomal protein S27-like OS=Homo sapiens OX=9606 GN=RPS27L PE=1 SV=3	#CQPTGGK	#CQPTGGK	1	4	1.67	1.44	1.555	0.162635	10.4588
Q14204	2712	DYNC1H1	DYNC1H1_C2712	DYHC1_HUMAN Cytoplasmic dynein 1 heavy chain 1 OS=Homo sapiens OX=9606 GN=DYNC1H1 PE=1 SV=5	#CNPPTDPGR	#CNPPTDPGR	2	1	1.16	1.95	1.555	0.558614	35.9238
Q8IVF2	5271	AHNAK2	AHNAK2_C5271	AHNK2_HUMAN Protein AHNAK2 OS=Homo sapiens OX=9606 GN=AHNAK2 PE=1 SV=2	NA	#CDLDSTGLK	NA	2	NA	1.555	1.555	NA	NA
Q9UHD8	248	SEPTIN9	SEPTIN9_C248	SEPT9_HUMAN Septin-9 OS=Homo sapiens OX=9606 GN=SEPTIN9 PE=1 SV=2	#CVGDMADTPR	#CVGDMADTPR	4	6	1.56	1.54	1.55	0.0141421	0.912396
Q9C0C2	749	TNKS1BP1	TNKS1BP1_C749	TB182_HUMAN 182 kDa tankyrase-1-binding protein OS=Homo sapiens OX=9606 GN=TNKS1BP1 PE=1 SV=4	#CQGASQDYGLGGASPR	NA	1	NA	1.55	NA	1.55	NA	NA
P22692	174	IGFBP4	IGFBP4_C174	IBP4_HUMAN Insulin-like growth factor-binding protein 4 OS=Homo sapiens OX=9606 GN=IGFBP4 PE=1 SV=2	#CQSELHR	NA	2	NA	1.55	NA	1.55	NA	NA
Q6XZF7	1434	DNMBP	DNMBP_C1434	DNMBP_HUMAN Dynamin-binding protein OS=Homo sapiens OX=9606 GN=DNMBP PE=1 SV=1	#CPSDPDSTSQPR	NA	1	NA	1.55	NA	1.55	NA	NA
P10515	344	DLAT	DLAT_C344	ODP2_HUMAN Dihydrolipoyllysine-residue acetyltransferase component of pyruvate dehydrogenase complex, mitochondrial OS=Homo sapiens OX=9606 GN=DLAT PE=1 SV=3	#CPATPAGPK	NA	1	NA	1.55	NA	1.55	NA	NA
Q6P1A2	146	LPCAT3	LPCAT3_C146	MBOA5_HUMAN Lysophospholipid acyltransferase 5 OS=Homo sapiens OX=9606 GN=LPCAT3 PE=1 SV=1	NA	#CVLTLK	NA	1	NA	1.55	1.55	NA	NA
Q9H1A3	215	METTL9	METTL9_C215	METL9_HUMAN Methyltransferase-like protein 9 OS=Homo sapiens OX=9606 GN=METTL9 PE=2 SV=1	NA	#CDQPLTLLK	NA	1	NA	1.55	1.55	NA	NA
Q9UPY5	414	SLC7A11	SLC7A11_C414	XCT_HUMAN Cystine/glutamate transporter OS=Homo sapiens OX=9606 GN=SLC7A11 PE=1 SV=1	NA	#CPDMHR	NA	2	NA	1.55	1.55	NA	NA
P18085	62	ARF4	ARF4_C62	ARF4_HUMAN ADP-ribosylation factor 4 OS=Homo sapiens OX=9606 GN=ARF4 PE=1 SV=3	#CFTVWDVGGQDR	#CFTVWDVGGQDR	1	1	1.59	1.49	1.54	0.0707107	4.5916
P09960	147	LTA4H	LTA4H_C147	LKHA4_HUMAN Leukotriene A-4 hydrolase OS=Homo sapiens OX=9606 GN=LTA4H PE=1 SV=2	#CQDTPSVK	#CQDTPSVK	2	1	2.09	0.99	1.54	0.777817	50.5076
O94925	283	GLS	GLS_C283	GLSK_HUMAN Glutaminase kidney isoform, mitochondrial OS=Homo sapiens OX=9606 GN=GLS PE=1 SV=1	#CLQSCVKPLK	NA	1	NA	1.54	NA	1.54	NA	NA
Q2TB90	812	HKDC1	HKDC1_C812	HKDC1_HUMAN Hexokinase HKDC1 OS=Homo sapiens OX=9606 GN=HKDC1 PE=1 SV=3	#CEDSIVVK	NA	1	NA	1.54	NA	1.54	NA	NA
Q8WVV4	496	POF1B	POF1B_C496	POF1B_HUMAN Protein POF1B OS=Homo sapiens OX=9606 GN=POF1B PE=1 SV=3	#CSDFQFK	NA	1	NA	1.54	NA	1.54	NA	NA
Q2TB90	684	HKDC1	HKDC1_C684	HKDC1_HUMAN Hexokinase HKDC1 OS=Homo sapiens OX=9606 GN=HKDC1 PE=1 SV=3	#CYMEDMR	NA	3	NA	1.54	NA	1.54	NA	NA
Q7Z6Z7	3658	HUWE1	HUWE1_C3658	HUWE1_HUMAN E3 ubiquitin-protein ligase HUWE1 OS=Homo sapiens OX=9606 GN=HUWE1 PE=1 SV=3	NA	#CETLSPDGLPEEQPQTTK	NA	1	NA	1.54	1.54	NA	NA
P80297	44	MT1X	MT1X_C44	MT1X_HUMAN Metallothionein-1X OS=Homo sapiens OX=9606 GN=MT1X PE=1 SV=1	#CAQGCICK	#CAQGCICK	1	2	1.76	1.31	1.535	0.318198	20.7295
P43304	45	GPD2	GPD2_C45	GPDM_HUMAN Glycerol-3-phosphate dehydrogenase, mitochondrial OS=Homo sapiens OX=9606 GN=GPD2 PE=1 SV=3	#CISEPVNR	#CISEPVNR	2	1	1.525	1.54	1.5325	0.0106066	0.692111
Q96GQ7	321	DDX27	DDX27_C321	DDX27_HUMAN Probable ATP-dependent RNA helicase DDX27 OS=Homo sapiens OX=9606 GN=DDX27 PE=1 SV=2	#CLAVGGLDVK	#CLAVGGLDVK	2	1	1.355	1.71	1.5325	0.251023	16.38
Q9NV70	650	EXOC1	EXOC1_C650	EXOC1_HUMAN Exocyst complex component 1 OS=Homo sapiens OX=9606 GN=EXOC1 PE=1 SV=4	#CISNQIR	NA	1	NA	1.53	NA	1.53	NA	NA
Q7Z3C6	178	ATG9A	ATG9A_C178	ATG9A_HUMAN Autophagy-related protein 9A OS=Homo sapiens OX=9606 GN=ATG9A PE=1 SV=3	#CTWQEVQAR	NA	2	NA	1.53	NA	1.53	NA	NA
Q9H1B7	14	IRF2BPL	IRF2BPL_C14	I2BPL_HUMAN Probable E3 ubiquitin-protein ligase IRF2BPL OS=Homo sapiens OX=9606 GN=IRF2BPL PE=1 SV=1	#CYLCDLPR	NA	1	NA	1.53	NA	1.53	NA	NA
P23458	810	JAK1	JAK1_C810	JAK1_HUMAN Tyrosine-protein kinase JAK1 OS=Homo sapiens OX=9606 GN=JAK1 PE=1 SV=2	#CRPVTPSCK	NA	1	NA	1.53	NA	1.53	NA	NA
P00533	797	EGFR	EGFR_C797	EGFR_HUMAN Epidermal growth factor receptor OS=Homo sapiens OX=9606 GN=EGFR PE=1 SV=2	NA	#CLLDYVR	NA	1	NA	1.53	1.53	NA	NA
Q12789	1091	GTF3C1	GTF3C1_C1091	TF3C1_HUMAN General transcription factor 3C polypeptide 1 OS=Homo sapiens OX=9606 GN=GTF3C1 PE=1 SV=4	#CAMLEYTTGSR	#CAMLEYTTGSR	1	1	1.67	1.39	1.53	0.19799	12.9405
Q9P1U0	78	ZNRD1	ZNRD1_C78	RPA12_HUMAN DNA-directed RNA polymerase I subunit RPA12 OS=Homo sapiens OX=9606 GN=ZNRD1 PE=2 SV=1	#CQGPVVDR	#CQGPVVDR	1	1	1.46	1.59	1.525	0.0919239	6.0278
Q9BZF9	408	UACA	UACA_C408	UACA_HUMAN Uveal autoantigen with coiled-coil domains and ankyrin repeats OS=Homo sapiens OX=9606 GN=UACA PE=1 SV=2	#CTSPGIPAHMQSR	#CTSPGIPAHMQSR #CTSPGIPAHMQ	1	2	1.53	1.51	1.52	0.0141421	0.930404
Q9BPY3	319	FAM118B	FAM118B_C319	F118B_HUMAN Protein FAM118B OS=Homo sapiens OX=9606 GN=FAM118B PE=1 SV=1	#CEISTR	NA	1	NA	1.52	NA	1.52	NA	NA
P46821	1814	MAP1B	MAP1B_C1814	MAP1B_HUMAN Microtubule-associated protein 1B OS=Homo sapiens OX=9606 GN=MAP1B PE=1 SV=2	#CHSSSSPPIDAA	#CHSSSSPPIDAA	2	4	1.5	1.54	1.52	0.0282843	1.86081
Q7L7V1	152	DHX32	DHX32_C152	DHX32_HUMAN Putative pre-mRNA-splicing factor ATP-dependent RNA helicase DHX32 OS=Homo sapiens OX=9606 GN=DHX32 PE=1 SV=1	NA	#CTNETILR	NA	1	NA	1.52	1.52	NA	NA
O60264	374	SMARCA5	SMARCA5_C374	SMCA5_HUMAN SWI/SNF-related matrix-associated actin-dependent regulator of chromatin subfamily A member 5 OS=Homo sapiens OX=9606 GN=SMARCA5 PE=1 SV=1	NA	#CLGDQK	NA	1	NA	1.52	1.52	NA	NA
Q9Y520	895	PRRC2C	PRRC2C_C895	PRC2C_HUMAN Protein PRRC2C OS=Homo sapiens OX=9606 GN=PRRC2C PE=1 SV=4	#CFEAPDQK	#CFEAPDQK	1	1	1.27	1.76	1.515	0.346482	22.8701
O15226	424	NKRF	NKRF_C424	NKRF_HUMAN NF-kappa-B-repressing factor OS=Homo sapiens OX=9606 GN=NKRF PE=1 SV=2	NA	#CHTGSSPR	NA	2	NA	1.515	1.515	NA	NA
Q9NXG2	31	THUMPD1	THUMPD1_C31	THUM1_HUMAN THUMP domain-containing protein 1 OS=Homo sapiens OX=9606 GN=THUMPD1 PE=1 SV=2	NA	#CDAGGPR	NA	2	NA	1.515	1.515	NA	NA
Q9Y5X2	442	SNX8	SNX8_C442	SNX8_HUMAN Sorting nexin-8 OS=Homo sapiens OX=9606 GN=SNX8 PE=1 SV=1	#CLFAGPH	#CLFAGPH	1	3	1.51	1.51	1.51	0	0
O75691	313	UTP20	UTP20_C313	UTP20_HUMAN Small subunit processome component 20 homolog OS=Homo sapiens OX=9606 GN=UTP20 PE=1 SV=3	#CESSEQIKR	NA	1	NA	1.51	NA	1.51	NA	NA
Q00653	432	NFKB2	NFKB2_C432	NFKB2_HUMAN Nuclear factor NF-kappa-B p100 subunit OS=Homo sapiens OX=9606 GN=NFKB2 PE=1 SV=4	#CEPQAPEMLQR	#CEPQAPEMLQR	1	3	1.73	1.28	1.505	0.318198	21.1427
Q8TEX9	42	IPO4	IPO4_C42	IPO4_HUMAN Importin-4 OS=Homo sapiens OX=9606 GN=IPO4 PE=1 SV=2	#CDLLASAADPQIR	#CDLLASAADPQIR	1	3	1.15	1.86	1.505	0.502046	33.3585
Q8WVY7	154	UBLCP1	UBLCP1_C154	UBCP1_HUMAN Ubiquitin-like domain-containing CTD phosphatase 1 OS=Homo sapiens OX=9606 GN=UBLCP1 PE=1 SV=2	NA	#CAETGVELMR #CAETGVELMRPY	NA	4	NA	1.505	1.505	NA	NA
Q15257	103	PTPA	PTPA_C103	PTPA_HUMAN Serine/threonine-protein phosphatase 2A activator OS=Homo sapiens OX=9606 GN=PTPA PE=1 SV=3	#CAPSEAIEK	#CAPSEAIEK	2	1	1.94	1.06	1.5	0.622254	41.4836
Q92598	516	HSPH1	HSPH1_C516	HS105_HUMAN Heat shock protein 105 kDa OS=Homo sapiens OX=9606 GN=HSPH1 PE=1 SV=1	#CLNQRPPENPDTDK	#CLNQRPPENPDTDK	3	3	1.58	1.42	1.5	0.113137	7.54247
O95388	123	WISP1	WISP1_C123	WISP1_HUMAN WNT1-inducible-signaling pathway protein 1 OS=Homo sapiens OX=9606 GN=WISP1 PE=1 SV=1	#CVLDGVR	NA	1	NA	1.5	NA	1.5	NA	NA
Q6XUX3	320	DSTYK	DSTYK_C320	DUSTY_HUMAN Dual serine/threonine and tyrosine protein kinase OS=Homo sapiens OX=9606 GN=DSTYK PE=1 SV=2	#CGAPGQDTK	NA	2	NA	1.5	NA	1.5	NA	NA
Q13617	232	CUL2	CUL2_C232	CUL2_HUMAN Cullin-2 OS=Homo sapiens OX=9606 GN=CUL2 PE=1 SV=2	#CSQYMEK	NA	1	NA	1.5	NA	1.5	NA	NA
O15042	65	U2SURP	U2SURP_C65	SR140_HUMAN U2 snRNP-associated SURP motif-containing protein OS=Homo sapiens OX=9606 GN=U2SURP PE=1 SV=2	#CDSPHQNLSR	#CDSPHQNLSR	1	2	1.34	1.66	1.5	0.226274	15.0849
P51991	85	HNRNPA3	HNRNPA3_C85	ROA3_HUMAN Heterogeneous nuclear ribonucleoprotein A3 OS=Homo sapiens OX=9606 GN=HNRNPA3 PE=1 SV=2	#CVEEVDAAMCAR	#CVEEVDAAMCAR	3	1	1.67	1.31	1.49	0.254558	17.0845
Q9BQ24	88	ZFYVE21	ZFYVE21_C88	ZFY21_HUMAN Zinc finger FYVE domain-containing protein 21 OS=Homo sapiens OX=9606 GN=ZFYVE21 PE=1 SV=1	#CFVDPVR	#CFVDPVR	2	1	1.53	1.45	1.49	0.0565685	3.79655
Q6SZW1	311	SARM1	SARM1_C311	SARM1_HUMAN Sterile alpha and TIR motif-containing protein 1 OS=Homo sapiens OX=9606 GN=SARM1 PE=1 SV=1	#CLVDASDTSQGR	NA	2	NA	1.49	NA	1.49	NA	NA
Q9H6R7	574	WDCP	WDCP_C574	WDCP_HUMAN WD repeat and coiled-coil-containing protein OS=Homo sapiens OX=9606 GN=WDCP PE=1 SV=1	#CLSELTNR	NA	2	NA	1.49	NA	1.49	NA	NA
Q06210	264	GFPT1	GFPT1_C264	GFPT1_HUMAN Glutamine--fructose-6-phosphate aminotransferase [isomerizing] 1 OS=Homo sapiens OX=9606 GN=GFPT1 PE=1 SV=3	#CLFPVEEK	NA	2	NA	1.49	NA	1.49	NA	NA
P25116	411	F2R	F2R_C411	PAR1_HUMAN Proteinase-activated receptor 1 OS=Homo sapiens OX=9606 GN=F2R PE=1 SV=2	NA	#CSSNLNNSIYK	NA	1	NA	1.49	1.49	NA	NA
P49368	475	CCT3	CCT3_C475	TCPG_HUMAN T-complex protein 1 subunit gamma OS=Homo sapiens OX=9606 GN=CCT3 PE=1 SV=4	NA	#CETWGVNGETGTLVDMK	NA	1	NA	1.49	1.49	NA	NA
Q92575	186	UBXN4	UBXN4_C186	UBXN4_HUMAN UBX domain-containing protein 4 OS=Homo sapiens OX=9606 GN=UBXN4 PE=1 SV=2	#CSDQRPAEDLNIR	#CSDQRPAEDLNIR	1	1	1.55	1.41	1.48	0.0989949	6.68885
Q9Y2Z0	62	SUGT1	SUGT1_C62	SGT1_HUMAN Protein SGT1 homolog OS=Homo sapiens OX=9606 GN=SUGT1 PE=1 SV=3	#CVAVADAK	NA	1	NA	1.48	NA	1.48	NA	NA
Q9Y256	314	RCE1	RCE1_C314	FACE2_HUMAN CAAX prenyl protease 2 OS=Homo sapiens OX=9606 GN=RCE1 PE=1 SV=1	#CVLLER	NA	2	NA	1.48	NA	1.48	NA	NA
P48735	235	IDH2	IDH2_C235	IDHP_HUMAN Isocitrate dehydrogenase [NADP], mitochondrial OS=Homo sapiens OX=9606 GN=IDH2 PE=1 SV=2	#CFQYAIQK	NA	1	NA	1.48	NA	1.48	NA	NA
P62633	97	CNBP	CNBP_C97	CNBP_HUMAN Cellular nucleic acid-binding protein OS=Homo sapiens OX=9606 GN=CNBP PE=1 SV=1	#CCYNCGK	NA	2	NA	1.48	NA	1.48	NA	NA
P50552	334	VASP	VASP_C334	VASP_HUMAN Vasodilator-stimulated phosphoprotein OS=Homo sapiens OX=9606 GN=VASP PE=1 SV=3	NA	#CTPSSSDYSDLQR	NA	3	NA	1.48	1.48	NA	NA
Q7Z7H8	213	MRPL10	MRPL10_C213	RM10_HUMAN 39S ribosomal protein L10, mitochondrial OS=Homo sapiens OX=9606 GN=MRPL10 PE=1 SV=3	NA	#CLTAQTH	NA	2	NA	1.48	1.48	NA	NA
P53041	11	PPP5C	PPP5C_C11	PPP5_HUMAN Serine/threonine-protein phosphatase 5 OS=Homo sapiens OX=9606 GN=PPP5C PE=1 SV=1	#CAEPPRDEPPADGALK	#CAEPPRDEPPADGALK	2	1	1.585	1.36	1.4725	0.159099	10.8047
Q5T7W7	355	TSTD2	TSTD2_C355	TSTD2_HUMAN Thiosulfate sulfurtransferase/rhodanese-like domain-containing protein 2 OS=Homo sapiens OX=9606 GN=TSTD2 PE=1 SV=1	#CTGGIR	#CTGGIR	1	1	1.67	1.27	1.47	0.282843	19.241
Q5TGZ0	13	MICOS10	MICOS10_C13	MIC10_HUMAN MICOS complex subunit MIC10 OS=Homo sapiens OX=9606 GN=MICOS10 PE=1 SV=1	#CLADAVVK	NA	2	NA	1.47	NA	1.47	NA	NA
P30154	402	PPP2R1B	PPP2R1B_C402	2AAB_HUMAN Serine/threonine-protein phosphatase 2A 65 kDa regulatory subunit A beta isoform OS=Homo sapiens OX=9606 GN=PPP2R1B PE=1 SV=3	#CVNEVIGIR	NA	1	NA	1.47	NA	1.47	NA	NA
Q99426	51	TBCB	TBCB_C51	TBCB_HUMAN Tubulin-folding cofactor B OS=Homo sapiens OX=9606 GN=TBCB PE=1 SV=2	#CMELELYGVDDK	NA	1	NA	1.47	NA	1.47	NA	NA
P15313	106	ATP6V1B1	ATP6V1B1_C106	VATB1_HUMAN V-type proton ATPase subunit B, kidney isoform OS=Homo sapiens OX=9606 GN=ATP6V1B1 PE=1 SV=3	#CEFTGDILR	NA	1	NA	1.47	NA	1.47	NA	NA
Q8TEQ6	1051	GEMIN5	GEMIN5_C1051	GEMI5_HUMAN Gem-associated protein 5 OS=Homo sapiens OX=9606 GN=GEMIN5 PE=1 SV=3	#CAYDAAK	NA	1	NA	1.47	NA	1.47	NA	NA
Q8WYP5	1412	AHCTF1	AHCTF1_C1412	ELYS_HUMAN Protein ELYS OS=Homo sapiens OX=9606 GN=AHCTF1 PE=1 SV=3	NA	#CAPSVYEGK	NA	1	NA	1.47	1.47	NA	NA
P46100	1122	ATRX	ATRX_C1122	ATRX_HUMAN Transcriptional regulator ATRX OS=Homo sapiens OX=9606 GN=ATRX PE=1 SV=5	NA	#CNSSDKR	NA	1	NA	1.47	1.47	NA	NA
O14976	1007	GAK	GAK_C1007	GAK_HUMAN Cyclin-G-associated kinase OS=Homo sapiens OX=9606 GN=GAK PE=1 SV=2	NA	#CSADFLHL	NA	1	NA	1.47	1.47	NA	NA
Q6YN16	166	HSDL2	HSDL2_C166	HSDL2_HUMAN Hydroxysteroid dehydrogenase-like protein 2 OS=Homo sapiens OX=9606 GN=HSDL2 PE=1 SV=1	#CAYTIAK	#CAYTIAK	2	1	1.85	1.08	1.465	0.544472	37.1653
Q8TEQ6	806	GEMIN5	GEMIN5_C806	GEMI5_HUMAN Gem-associated protein 5 OS=Homo sapiens OX=9606 GN=GEMIN5 PE=1 SV=3	#CTPVSSGFEK	#CTPVSSGFEK	1	1	1.64	1.29	1.465	0.247487	16.8933
P61619	13	SEC61A1	SEC61A1_C13	S61A1_HUMAN Protein transport protein Sec61 subunit alpha isoform 1 OS=Homo sapiens OX=9606 GN=SEC61A1 PE=1 SV=2	#CVILPEIQKPER	#CVILPEIQKPER	1	6	1.41	1.52	1.465	0.0777817	5.30933
O75821	25	EIF3G	EIF3G_C25	EIF3G_HUMAN Eukaryotic translation initiation factor 3 subunit G OS=Homo sapiens OX=9606 GN=EIF3G PE=1 SV=2	#CVTSELLK	NA	3	NA	1.46	NA	1.46	NA	NA
O75369	2556	FLNB	FLNB_C2556	FLNB_HUMAN Filamin-B OS=Homo sapiens OX=9606 GN=FLNB PE=1 SV=2	#CEEVSMK	NA	1	NA	1.46	NA	1.46	NA	NA
P46939	3423	UTRN	UTRN_C3423	UTRO_HUMAN Utrophin OS=Homo sapiens OX=9606 GN=UTRN PE=1 SV=2	#CPNVPSRPQAM	NA	1	NA	1.46	NA	1.46	NA	NA
Q92616	1362	GCN1	GCN1_C1362	GCN1_HUMAN eIF-2-alpha kinase activator GCN1 OS=Homo sapiens OX=9606 GN=GCN1 PE=1 SV=6	NA	#CLPPLVPAIK	NA	3	NA	1.46	1.46	NA	NA
Q12769	931	NUP160	NUP160_C931	NU160_HUMAN Nuclear pore complex protein Nup160 OS=Homo sapiens OX=9606 GN=NUP160 PE=1 SV=3	#CQAASEVGK	#CQAASEVGK	1	1	1.26	1.65	1.455	0.275772	18.9534
P16615	997	ATP2A2	ATP2A2_C997	AT2A2_HUMAN Sarcoplasmic/endoplasmic reticulum calcium ATPase 2 OS=Homo sapiens OX=9606 GN=ATP2A2 PE=1 SV=1	#CVQPATK	#CVQPATK	1	1	1.37	1.53	1.45	0.113137	7.80256
O43491	867	EPB41L2	EPB41L2_C867	E41L2_HUMAN Band 4.1-like protein 2 OS=Homo sapiens OX=9606 GN=EPB41L2 PE=1 SV=1	#CSEPPVVK	NA	3	NA	1.45	NA	1.45	NA	NA
Q9Y287	38	ITM2B	ITM2B_C38	ITM2B_HUMAN Integral membrane protein 2B OS=Homo sapiens OX=9606 GN=ITM2B PE=1 SV=1	#CKDPDDVVPVGQR	NA	2	NA	1.45	NA	1.45	NA	NA
Q9NVE7	537	PANK4	PANK4_C537	PANK4_HUMAN Pantothenate kinase 4 OS=Homo sapiens OX=9606 GN=PANK4 PE=1 SV=1	#CFPGVVR	#CFPGVVR	1	1	1.39	1.51	1.45	0.0848528	5.85192
Q6ZV73	744	FGD6	FGD6_C744	FGD6_HUMAN FYVE, RhoGEF and PH domain-containing protein 6 OS=Homo sapiens OX=9606 GN=FGD6 PE=1 SV=2	NA	#CAPEYENIR	NA	2	NA	1.45	1.45	NA	NA
P36894	323	BMPR1A	BMPR1A_C323	BMR1A_HUMAN Bone morphogenetic protein receptor type-1A OS=Homo sapiens OX=9606 GN=BMPR1A PE=1 SV=2	NA	#CATLDTR	NA	1	NA	1.45	1.45	NA	NA
P25116	296	F2R	F2R_C296	PAR1_HUMAN Proteinase-activated receptor 1 OS=Homo sapiens OX=9606 GN=F2R PE=1 SV=2	#CLSSSAVANR	NA	2	NA	1.44	NA	1.44	NA	NA
Q06547	331	GABPB1	GABPB1_C331	GABP1_HUMAN GA-binding protein subunit beta-1 OS=Homo sapiens OX=9606 GN=GABPB1 PE=1 SV=2	#CIEIIENR	NA	1	NA	1.44	NA	1.44	NA	NA
Q7Z5J4	322	RAI1	RAI1_C322	RAI1_HUMAN Retinoic acid-induced protein 1 OS=Homo sapiens OX=9606 GN=RAI1 PE=1 SV=2	NA	#CQPDAAVR	NA	1	NA	1.44	1.44	NA	NA
Q96SN8	528	CDK5RAP2	CDK5RAP2_C528	CK5P2_HUMAN CDK5 regulatory subunit-associated protein 2 OS=Homo sapiens OX=9606 GN=CDK5RAP2 PE=1 SV=5	NA	#CSSQQPPGSK	NA	2	NA	1.435	1.435	NA	NA
P17029	243	ZKSCAN1	ZKSCAN1_C243	ZKSC1_HUMAN Zinc finger protein with KRAB and SCAN domains 1 OS=Homo sapiens OX=9606 GN=ZKSCAN1 PE=1 SV=3	#CQNLAR	NA	1	NA	1.43	NA	1.43	NA	NA
Q99497	53	PARK7	PARK7_C53	PARK7_HUMAN Protein/nucleic acid deglycase DJ-1 OS=Homo sapiens OX=9606 GN=PARK7 PE=1 SV=2	#CPDASLEDAKK	NA	1	NA	1.43	NA	1.43	NA	NA
Q68CZ2	888	TNS3	TNS3_C888	TENS3_HUMAN Tensin-3 OS=Homo sapiens OX=9606 GN=TNS3 PE=1 SV=2	#CPETLTH	NA	2	NA	1.43	NA	1.43	NA	NA
P21333	2543	FLNA	FLNA_C2543	FLNA_HUMAN Filamin-A OS=Homo sapiens OX=9606 GN=FLNA PE=1 SV=4	#CAPQHGAPGPGPADASK #CAPQHGAPGPGPAD #CAPQHGAPGPGPA #CAPQHGAPGPGPADAS #CAPQHGAPGPGPADA	#CAPQHGAPGPGPADASK #CAPQHGAPGPGPA #CAPQHGAPGPGPADAS #CAPQHGAPGPGPADA	11	8	1.38	1.48	1.43	0.0707107	4.9448
O43847	1127	NRDC	NRDC_C1127	NRDC_HUMAN Nardilysin OS=Homo sapiens OX=9606 GN=NRDC PE=1 SV=3	NA	#CIIPITDIR	NA	1	NA	1.43	1.43	NA	NA
O95359	2859	TACC2	TACC2_C2859	TACC2_HUMAN Transforming acidic coiled-coil-containing protein 2 OS=Homo sapiens OX=9606 GN=TACC2 PE=1 SV=3	#CAQEYLSR	#CAQEYLSR	2	3	1.395	1.46	1.4275	0.0459619	3.21975
P60842	134	EIF4A1	EIF4A1_C134	IF4A1_HUMAN Eukaryotic initiation factor 4A-I OS=Homo sapiens OX=9606 GN=EIF4A1 PE=1 SV=1	#CIGGTNVR	#CIGGTNVR	4	3	1.44	1.41	1.425	0.0212132	1.48865
P23528	147	CFL1	CFL1_C147	COF1_HUMAN Cofilin-1 OS=Homo sapiens OX=9606 GN=CFL1 PE=1 SV=3	#CTLAEK	#CTLAEK	1	1	1.43	1.42	1.425	0.00707107	0.496215
Q9NSK0	113	KLC4	KLC4_C113	KLC4_HUMAN Kinesin light chain 4 OS=Homo sapiens OX=9606 GN=KLC4 PE=1 SV=3	#CQENQWLR	NA	2	NA	1.42	NA	1.42	NA	NA
Q9NZN5	294	ARHGEF12	ARHGEF12_C294	ARHGC_HUMAN Rho guanine nucleotide exchange factor 12 OS=Homo sapiens OX=9606 GN=ARHGEF12 PE=1 SV=1	#CSSGDASRPSSDNADSPK	NA	1	NA	1.42	NA	1.42	NA	NA
Q9C0C2	1443	TNKS1BP1	TNKS1BP1_C1443	TB182_HUMAN 182 kDa tankyrase-1-binding protein OS=Homo sapiens OX=9606 GN=TNKS1BP1 PE=1 SV=4	#CPARPPPSGSQ	NA	2	NA	1.42	NA	1.42	NA	NA
O15040	778	TECPR2	TECPR2_C778	TCPR2_HUMAN Tectonin beta-propeller repeat-containing protein 2 OS=Homo sapiens OX=9606 GN=TECPR2 PE=1 SV=4	#CSQQDLSR	NA	3	NA	1.42	NA	1.42	NA	NA
Q14789	3070	GOLGB1	GOLGB1_C3070	GOGB1_HUMAN Golgin subfamily B member 1 OS=Homo sapiens OX=9606 GN=GOLGB1 PE=1 SV=2	#CDTSQSLR	NA	2	NA	1.42	NA	1.42	NA	NA
Q86W50	253	METTL16	METTL16_C253	MET16_HUMAN RNA N6-adenosine-methyltransferase METTL16 OS=Homo sapiens OX=9606 GN=METTL16 PE=1 SV=2	#CSLAPLKEELR	#CSLAPLK #CSLAPLKEELR	2	3	1.27	1.57	1.42	0.212132	14.9389
Q15645	341	TRIP13	TRIP13_C341	PCH2_HUMAN Pachytene checkpoint protein 2 homolog OS=Homo sapiens OX=9606 GN=TRIP13 PE=1 SV=2	NA	#CQIIYPR	NA	2	NA	1.42	1.42	NA	NA
Q14974	585	KPNB1	KPNB1_C585	IMB1_HUMAN Importin subunit beta-1 OS=Homo sapiens OX=9606 GN=KPNB1 PE=1 SV=2	NA	#CATLQNVLR	NA	2	NA	1.42	1.42	NA	NA
P23193	212	TCEA1	TCEA1_C212	TCEA1_HUMAN Transcription elongation factor A protein 1 OS=Homo sapiens OX=9606 GN=TCEA1 PE=1 SV=2	NA	#CGNIPPDLFAR	NA	1	NA	1.42	1.42	NA	NA
P60059	25	SEC61G	SEC61G_C25	SC61G_HUMAN Protein transport protein Sec61 subunit gamma OS=Homo sapiens OX=9606 GN=SEC61G PE=1 SV=1	NA	#CTKPDR	NA	1	NA	1.42	1.42	NA	NA
Q5GLZ8	60	HERC4	HERC4_C60	HERC4_HUMAN Probable E3 ubiquitin-protein ligase HERC4 OS=Homo sapiens OX=9606 GN=HERC4 PE=1 SV=1	#CNDLGQLGHEK	#CNDLGQLGHEK	2	5	1.4	1.43	1.415	0.0212132	1.49917
P27816	126	MAP4	MAP4_C126	MAP4_HUMAN Microtubule-associated protein 4 OS=Homo sapiens OX=9606 GN=MAP4 PE=1 SV=3	#CFQPEQVVDPIQTDPFK	#CFQPEQVVDPIQTDPFK	2	1	1.38	1.45	1.415	0.0494975	3.49805
P26368	464	U2AF2	U2AF2_C464	U2AF2_HUMAN Splicing factor U2AF 65 kDa subunit OS=Homo sapiens OX=9606 GN=U2AF2 PE=1 SV=4	NA	#CDPDSYHR	NA	2	NA	1.415	1.415	NA	NA
Q70CQ2	2364	USP34	USP34_C2364	UBP34_HUMAN Ubiquitin carboxyl-terminal hydrolase 34 OS=Homo sapiens OX=9606 GN=USP34 PE=1 SV=2	#CPNQIVR	#CPNQIVR	4	1	1.61	1.21	1.41	0.282843	20.0598
Q14008	1500	CKAP5	CKAP5_C1500	CKAP5_HUMAN Cytoskeleton-associated protein 5 OS=Homo sapiens OX=9606 GN=CKAP5 PE=1 SV=3	#CEMPELVQHK #CEMPELVQH	#CEMPELVQH #CEMPELVQHK	5	4	1.55	1.27	1.41	0.19799	14.0418
Q86Y56	612	DNAAF5	DNAAF5_C612	DAAF5_HUMAN Dynein assembly factor 5, axonemal OS=Homo sapiens OX=9606 GN=DNAAF5 PE=1 SV=4	#CLQPSQDPQMR	NA	1	NA	1.41	NA	1.41	NA	NA
Q969F9	56	HPS3	HPS3_C56	HPS3_HUMAN Hermansky-Pudlak syndrome 3 protein OS=Homo sapiens OX=9606 GN=HPS3 PE=1 SV=1	#CAFSTLGR	NA	1	NA	1.41	NA	1.41	NA	NA
Q96FV9	49	THOC1	THOC1_C49	THOC1_HUMAN THO complex subunit 1 OS=Homo sapiens OX=9606 GN=THOC1 PE=1 SV=1	#CTLDQAFR	NA	2	NA	1.41	NA	1.41	NA	NA
P55957	3	BID	BID_C3	BID_HUMAN BH3-interacting domain death agonist OS=Homo sapiens OX=9606 GN=BID PE=1 SV=1	#CEVNNGSSLR	NA	2	NA	1.41	NA	1.41	NA	NA
Q86X02	317	CDR2L	CDR2L_C317	CDR2L_HUMAN Cerebellar degeneration-related protein 2-like OS=Homo sapiens OX=9606 GN=CDR2L PE=1 SV=2	#CSDTALNAIVAK	#CSDTALNAIVAK	1	1	1.42	1.39	1.405	0.0212132	1.50984
O60664	39	PLIN3	PLIN3_C39	PLIN3_HUMAN Perilipin-3 OS=Homo sapiens OX=9606 GN=PLIN3 PE=1 SV=3	#CDMVSAAYASTK	NA	3	NA	1.4	NA	1.4	NA	NA
P33764	14	S100A3	S100A3_C14	S10A3_HUMAN Protein S100-A3 OS=Homo sapiens OX=9606 GN=S100A3 PE=1 SV=1	#CTFQEYAGR	NA	3	NA	1.4	NA	1.4	NA	NA
P49711	38	CTCF	CTCF_C38	CTCF_HUMAN Transcriptional repressor CTCF OS=Homo sapiens OX=9606 GN=CTCF PE=1 SV=1	#CHLPQNQTDGGEVVQDVNSSVQ	NA	1	NA	1.4	NA	1.4	NA	NA
Q86V87	204	FAM160B2	FAM160B2_C204	F16B2_HUMAN Protein FAM160B2 OS=Homo sapiens OX=9606 GN=FAM160B2 PE=2 SV=2	#CSHDGAPARPQ	NA	1	NA	1.4	NA	1.4	NA	NA
Q6P6C2	378	ALKBH5	ALKBH5_C378	ALKB5_HUMAN RNA demethylase ALKBH5 OS=Homo sapiens OX=9606 GN=ALKBH5 PE=1 SV=2	#CSEAAGSPAR	NA	1	NA	1.4	NA	1.4	NA	NA
P78368	54	CSNK1G2	CSNK1G2_C54	KC1G2_HUMAN Casein kinase I isoform gamma-2 OS=Homo sapiens OX=9606 GN=CSNK1G2 PE=1 SV=1	NA	#CGNFGELR	NA	2	NA	1.4	1.4	NA	NA
P49589	204	CARS	CARS_C204	SYCC_HUMAN Cysteine--tRNA ligase, cytoplasmic OS=Homo sapiens OX=9606 GN=CARS PE=1 SV=3	NA	#CDVTDNSIFSK	NA	1	NA	1.4	1.4	NA	NA
O43513	197	MED7	MED7_C197	MED7_HUMAN Mediator of RNA polymerase II transcription subunit 7 OS=Homo sapiens OX=9606 GN=MED7 PE=1 SV=1	NA	#CTGQNEHQR	NA	2	NA	1.395	1.395	NA	NA
Q86VP1	719	TAX1BP1	TAX1BP1_C719	TAXB1_HUMAN Tax1-binding protein 1 OS=Homo sapiens OX=9606 GN=TAX1BP1 PE=1 SV=2	#CFDSSFDVHK	#CFDSSFDVHK	3	3	1.28	1.5	1.39	0.155563	11.1916
P13797	209	PLS3	PLS3_C209	PLST_HUMAN Plastin-3 OS=Homo sapiens OX=9606 GN=PLS3 PE=1 SV=4	#CHVVNIGAEDLR	#CHVVNIGAEDLR	1	2	0.96	1.82	1.39	0.608112	43.7491
P26641	266	EEF1G	EEF1G_C266	EF1G_HUMAN Elongation factor 1-gamma OS=Homo sapiens OX=9606 GN=EEF1G PE=1 SV=3	#CEQALAAEPK	#CEQALAAEPK	3	3	1.39	1.39	1.39	0	0
O43896	229	KIF1C	KIF1C_C229	KIF1C_HUMAN Kinesin-like protein KIF1C OS=Homo sapiens OX=9606 GN=KIF1C PE=1 SV=3	#CHDQLTGLDSEK	NA	1	NA	1.39	NA	1.39	NA	NA
O15269	438	SPTLC1	SPTLC1_C438	SPTC1_HUMAN Serine palmitoyltransferase 1 OS=Homo sapiens OX=9606 GN=SPTLC1 PE=1 SV=1	#CLPPPSIR	NA	1	NA	1.39	NA	1.39	NA	NA
P13639	536	EEF2	EEF2_C536	EF2_HUMAN Elongation factor 2 OS=Homo sapiens OX=9606 GN=EEF2 PE=1 SV=4	#CIIEESGEHIIA	NA	3	NA	1.39	NA	1.39	NA	NA
Q9Y2U8	346	LEMD3	LEMD3_C346	MAN1_HUMAN Inner nuclear membrane protein Man1 OS=Homo sapiens OX=9606 GN=LEMD3 PE=1 SV=2	NA	#CDQVDSSPVPR	NA	1	NA	1.39	1.39	NA	NA
Q92616	939	GCN1	GCN1_C939	GCN1_HUMAN eIF-2-alpha kinase activator GCN1 OS=Homo sapiens OX=9606 GN=GCN1 PE=1 SV=6	NA	#CQEELSVAVK	NA	2	NA	1.39	1.39	NA	NA
P62913	21	RPL11	RPL11_C21	RL11_HUMAN 60S ribosomal protein L11 OS=Homo sapiens OX=9606 GN=RPL11 PE=1 SV=2	NA	#CLNICVGESGDR	NA	2	NA	1.39	1.39	NA	NA
P17655	82	CAPN2	CAPN2_C82	CAN2_HUMAN Calpain-2 catalytic subunit OS=Homo sapiens OX=9606 GN=CAPN2 PE=1 SV=6	NA	#CADPQFIIGGATR	NA	1	NA	1.39	1.39	NA	NA
P00533	818	EGFR	EGFR_C818	EGFR_HUMAN Epidermal growth factor receptor OS=Homo sapiens OX=9606 GN=EGFR PE=1 SV=2	NA	#CVQIAK	NA	1	NA	1.39	1.39	NA	NA
Q5QJE6	116	DNTTIP2	DNTTIP2_C116	TDIF2_HUMAN Deoxynucleotidyltransferase terminal-interacting protein 2 OS=Homo sapiens OX=9606 GN=DNTTIP2 PE=1 SV=2	#CSPVSSVR	#CSPVSSVR	1	1	1.49	1.28	1.385	0.148492	10.7215
Q9NP92	33	MRPS30	MRPS30_C33	RT30_HUMAN 39S ribosomal protein S30, mitochondrial OS=Homo sapiens OX=9606 GN=MRPS30 PE=1 SV=2	#CQDVAATPVAR	#CQDVAATPVAR	1	2	1.45	1.32	1.385	0.0919239	6.6371
Q92616	2558	GCN1	GCN1_C2558	GCN1_HUMAN eIF-2-alpha kinase activator GCN1 OS=Homo sapiens OX=9606 GN=GCN1 PE=1 SV=6	#CLQNPSSDIR	#CLQNPSSDIR	1	2	1.48	1.28	1.38	0.141421	10.2479
P31153	214	MAT2A	MAT2A_C214	METK2_HUMAN S-adenosylmethionine synthase isoform type-2 OS=Homo sapiens OX=9606 GN=MAT2A PE=1 SV=1	#CLDEMR	NA	1	NA	1.38	NA	1.38	NA	NA
Q9HBM0	488	VEZT	VEZT_C488	VEZA_HUMAN Vezatin OS=Homo sapiens OX=9606 GN=VEZT PE=1 SV=3	#CWEEAISQVDK	NA	2	NA	1.38	NA	1.38	NA	NA
Q9BXB5	511	OSBPL10	OSBPL10_C511	OSB10_HUMAN Oxysterol-binding protein-related protein 10 OS=Homo sapiens OX=9606 GN=OSBPL10 PE=1 SV=2	#CHEHPMADDPSK	NA	2	NA	1.38	NA	1.38	NA	NA
Q8IVF2	4752	AHNAK2	AHNAK2_C4752	AHNK2_HUMAN Protein AHNAK2 OS=Homo sapiens OX=9606 GN=AHNAK2 PE=1 SV=2	#CSEPSMQMPK	NA	1	NA	1.38	NA	1.38	NA	NA
Q92538	613	GBF1	GBF1_C613	GBF1_HUMAN Golgi-specific brefeldin A-resistance guanine nucleotide exchange factor 1 OS=Homo sapiens OX=9606 GN=GBF1 PE=1 SV=2	NA	#CEIVDGTR	NA	1	NA	1.38	1.38	NA	NA
P54886	88	ALDH18A1	ALDH18A1_C88	P5CS_HUMAN Delta-1-pyrroline-5-carboxylate synthase OS=Homo sapiens OX=9606 GN=ALDH18A1 PE=1 SV=2	NA	#CGLALGR	NA	1	NA	1.38	1.38	NA	NA
Q9BQG0	942	MYBBP1A	MYBBP1A_C942	MBB1A_HUMAN Myb-binding protein 1A OS=Homo sapiens OX=9606 GN=MYBBP1A PE=1 SV=2	NA	#CVHETQEK	NA	1	NA	1.38	1.38	NA	NA
P34932	34	HSPA4	HSPA4_C34	HSP74_HUMAN Heat shock 70 kDa protein 4 OS=Homo sapiens OX=9606 GN=HSPA4 PE=1 SV=4	#CTPACISFGPK	#CTPACISFGPK	2	5	1.145	1.61	1.3775	0.328805	23.8697
Q9UNS2	383	COPS3	COPS3_C383	CSN3_HUMAN COP9 signalosome complex subunit 3 OS=Homo sapiens OX=9606 GN=COPS3 PE=1 SV=3	#CIELDER	#CIELDER	2	1	1.42	1.33	1.375	0.0636396	4.62834
P38117	66	ETFB	ETFB_C66	ETFB_HUMAN Electron transfer flavoprotein subunit beta OS=Homo sapiens OX=9606 GN=ETFB PE=1 SV=3	#CGPAQCQETIR	NA	2	NA	1.37	NA	1.37	NA	NA
Q9UKV8	188	AGO2	AGO2_C188	AGO2_HUMAN Protein argonaute-2 OS=Homo sapiens OX=9606 GN=AGO2 PE=1 SV=3	#CSNPLGGGR	NA	1	NA	1.37	NA	1.37	NA	NA
P41252	237	IARS	IARS_C237	SYIC_HUMAN Isoleucine--tRNA ligase, cytoplasmic OS=Homo sapiens OX=9606 GN=IARS PE=1 SV=2	NA	#CVNPEMQYVK	NA	2	NA	1.37	1.37	NA	NA
O95373	827	IPO7	IPO7_C827	IPO7_HUMAN Importin-7 OS=Homo sapiens OX=9606 GN=IPO7 PE=1 SV=1	NA	#CFLGLHDR	NA	1	NA	1.37	1.37	NA	NA
Q08378	455	GOLGA3	GOLGA3_C455	GOGA3_HUMAN Golgin subfamily A member 3 OS=Homo sapiens OX=9606 GN=GOLGA3 PE=1 SV=2	NA	#CSHSSQQR	NA	2	NA	1.37	1.37	NA	NA
Q8NF37	330	LPCAT1	LPCAT1_C330	PCAT1_HUMAN Lysophosphatidylcholine acyltransferase 1 OS=Homo sapiens OX=9606 GN=LPCAT1 PE=1 SV=2	NA	#CLLEFAR	NA	1	NA	1.37	1.37	NA	NA
P15170	381	GSPT1	GSPT1_C381	ERF3A_HUMAN Eukaryotic peptide chain release factor GTP-binding subunit ERF3A OS=Homo sapiens OX=9606 GN=GSPT1 PE=1 SV=1	#CDPNNLCHSGR	NA	2	NA	1.365	NA	1.365	NA	NA
Q13219	485	PAPPA	PAPPA_C485	PAPP1_HUMAN Pappalysin-1 OS=Homo sapiens OX=9606 GN=PAPPA PE=1 SV=3	#CFDPDSPHR	NA	1	NA	1.36	NA	1.36	NA	NA
Q92616	1984	GCN1	GCN1_C1984	GCN1_HUMAN eIF-2-alpha kinase activator GCN1 OS=Homo sapiens OX=9606 GN=GCN1 PE=1 SV=6	#CIGLSEIMK	NA	1	NA	1.36	NA	1.36	NA	NA
P45880	76	VDAC2	VDAC2_C76	VDAC2_HUMAN Voltage-dependent anion-selective channel protein 2 OS=Homo sapiens OX=9606 GN=VDAC2 PE=1 SV=2	#CEYGLTFTEK	NA	2	NA	1.36	NA	1.36	NA	NA
P31641	171	SLC6A6	SLC6A6_C171	SC6A6_HUMAN Sodium- and chloride-dependent taurine transporter OS=Homo sapiens OX=9606 GN=SLC6A6 PE=1 SV=2	#CMEDTMR	NA	1	NA	1.36	NA	1.36	NA	NA
Q99650	871	OSMR	OSMR_C871	OSMR_HUMAN Oncostatin-M-specific receptor subunit beta OS=Homo sapiens OX=9606 GN=OSMR PE=1 SV=1	#CGHVPVSPK	NA	1	NA	1.36	NA	1.36	NA	NA
O75616	150	ERAL1	ERAL1_C150	ERAL1_HUMAN GTPase Era, mitochondrial OS=Homo sapiens OX=9606 GN=ERAL1 PE=1 SV=2	NA	#CQALGVITEK	NA	1	NA	1.36	1.36	NA	NA
Q9HCC0	216	MCCC2	MCCC2_C216	MCCB_HUMAN Methylcrotonoyl-CoA carboxylase beta chain, mitochondrial OS=Homo sapiens OX=9606 GN=MCCC2 PE=1 SV=1	NA	#CTAGGAYVPAMADENIIVR	NA	2	NA	1.36	1.36	NA	NA
Q86VP6	1007	CAND1	CAND1_C1007	CAND1_HUMAN Cullin-associated NEDD8-dissociated protein 1 OS=Homo sapiens OX=9606 GN=CAND1 PE=1 SV=2	NA	#CIGDFLK	NA	2	NA	1.36	1.36	NA	NA
P10599	73	TXN	TXN_C73	THIO_HUMAN Thioredoxin OS=Homo sapiens OX=9606 GN=TXN PE=1 SV=3	#CMPTFQFFK	#CMPTFQFFK	5	6	1.38	1.34	1.36	0.0282843	2.07973
Q9Y277	36	VDAC3	VDAC3_C36	VDAC3_HUMAN Voltage-dependent anion-selective channel protein 3 OS=Homo sapiens OX=9606 GN=VDAC3 PE=1 SV=1	#CSGVEFSTSGH #CSGVEFSTSGHAY	#CSGVEFSTSGHAYTDTGK #CSGVEFSTSGH #CSGVEFSTSGHAY	6	9	1.38	1.32	1.35	0.0424264	3.1427
P50395	282	GDI2	GDI2_C282	GDIB_HUMAN Rab GDP dissociation inhibitor beta OS=Homo sapiens OX=9606 GN=GDI2 PE=1 SV=2	#CDPSYVK	NA	1	NA	1.35	NA	1.35	NA	NA
Q6IN84	182	MRM1	MRM1_C182	MRM1_HUMAN rRNA methyltransferase 1, mitochondrial OS=Homo sapiens OX=9606 GN=MRM1 PE=1 SV=1	#CPLTPVVSK	NA	2	NA	1.35	NA	1.35	NA	NA
P68543	51	UBXN2A	UBXN2A_C51	UBX2A_HUMAN UBX domain-containing protein 2A OS=Homo sapiens OX=9606 GN=UBXN2A PE=1 SV=1	#CVSPAEQK	NA	3	NA	1.35	NA	1.35	NA	NA
Q8WU76	331	SCFD2	SCFD2_C331	SCFD2_HUMAN Sec1 family domain-containing protein 2 OS=Homo sapiens OX=9606 GN=SCFD2 PE=1 SV=2	#CLSQSSDTTAK	NA	2	NA	1.35	NA	1.35	NA	NA
P26358	1499	DNMT1	DNMT1_C1499	DNMT1_HUMAN DNA (cytosine-5)-methyltransferase 1 OS=Homo sapiens OX=9606 GN=DNMT1 PE=1 SV=2	#CLPHTGNR	NA	1	NA	1.35	NA	1.35	NA	NA
A2RRP1	1594	NBAS	NBAS_C1594	NBAS_HUMAN Neuroblastoma-amplified sequence OS=Homo sapiens OX=9606 GN=NBAS PE=1 SV=2	#CHPLYR	NA	1	NA	1.35	NA	1.35	NA	NA
Q86XA9	1421	HEATR5A	HEATR5A_C1421	HTR5A_HUMAN HEAT repeat-containing protein 5A OS=Homo sapiens OX=9606 GN=HEATR5A PE=1 SV=2	#CLEDGIR	#CLEDGIR	2	2	1.3	1.4	1.35	0.0707107	5.23783
P42330	145	AKR1C3	AKR1C3_C145	AK1C3_HUMAN Aldo-keto reductase family 1 member C3 OS=Homo sapiens OX=9606 GN=AKR1C3 PE=1 SV=4	#CTTWEAMEK	#CTTWEAMEK	2	5	1.12	1.58	1.35	0.325269	24.094
Q9UPM8	976	AP4E1	AP4E1_C976	AP4E1_HUMAN AP-4 complex subunit epsilon-1 OS=Homo sapiens OX=9606 GN=AP4E1 PE=1 SV=2	NA	#CLPVMEAESTK	NA	1	NA	1.35	1.35	NA	NA
Q01831	377	XPC	XPC_C377	XPC_HUMAN DNA repair protein complementing XP-C cells OS=Homo sapiens OX=9606 GN=XPC PE=1 SV=4	NA	#CRPSAK	NA	1	NA	1.35	1.35	NA	NA
Q00653	891	NFKB2	NFKB2_C891	NFKB2_HUMAN Nuclear factor NF-kappa-B p100 subunit OS=Homo sapiens OX=9606 GN=NFKB2 PE=1 SV=4	#CHGHPQPQVH	#CHGHPQPQVH	1	1	1.65	1.04	1.345	0.431335	32.0695
P47755	111	CAPZA2	CAPZA2_C111	CAZA2_HUMAN F-actin-capping protein subunit alpha-2 OS=Homo sapiens OX=9606 GN=CAPZA2 PE=1 SV=3	#CEVENAVESWR	#CEVENAVESWR	2	1	1.5	1.19	1.345	0.219203	16.2976
Q9NPB9	132	ACKR4	ACKR4_C132	ACKR4_HUMAN Atypical chemokine receptor 4 OS=Homo sapiens OX=9606 GN=ACKR4 PE=1 SV=1	#CISIDR	#CISIDR	2	2	1.375	1.31	1.3425	0.0459619	3.42361
O95573	429	ACSL3	ACSL3_C429	ACSL3_HUMAN Long-chain-fatty-acid--CoA ligase 3 OS=Homo sapiens OX=9606 GN=ACSL3 PE=1 SV=3	#CDSFVFR	#CDSFVFR	1	2	1.35	1.33	1.34	0.0141421	1.05538
Q96JQ2	445	CLMN	CLMN_C445	CLMN_HUMAN Calmin OS=Homo sapiens OX=9606 GN=CLMN PE=1 SV=1	#CFEGSPR	NA	1	NA	1.34	NA	1.34	NA	NA
P57740	78	NUP107	NUP107_C78	NU107_HUMAN Nuclear pore complex protein Nup107 OS=Homo sapiens OX=9606 GN=NUP107 PE=1 SV=1	#CILGTGGK	NA	1	NA	1.34	NA	1.34	NA	NA
Q9BVG8	794	KIFC3	KIFC3_C794	KIFC3_HUMAN Kinesin-like protein KIFC3 OS=Homo sapiens OX=9606 GN=KIFC3 PE=1 SV=4	#CQTPQPSAR	NA	2	NA	1.34	NA	1.34	NA	NA
Q9Y5B9	574	SUPT16H	SUPT16H_C574	SP16H_HUMAN FACT complex subunit SPT16 OS=Homo sapiens OX=9606 GN=SUPT16H PE=1 SV=1	#CPGSALGR	NA	1	NA	1.34	NA	1.34	NA	NA
Q9HCK8	1780	CHD8	CHD8_C1780	CHD8_HUMAN Chromodomain-helicase-DNA-binding protein 8 OS=Homo sapiens OX=9606 GN=CHD8 PE=1 SV=5	NA	#CEAAFK	NA	1	NA	1.34	1.34	NA	NA
Q16658	260	FSCN1	FSCN1_C260	FSCN1_HUMAN Fascin OS=Homo sapiens OX=9606 GN=FSCN1 PE=1 SV=3	NA	#CAQVVLQAANER	NA	1	NA	1.34	1.34	NA	NA
P42356	19	PI4KA	PI4KA_C19	PI4KA_HUMAN Phosphatidylinositol 4-kinase alpha OS=Homo sapiens OX=9606 GN=PI4KA PE=1 SV=4	NA	#CSGSGSSASR	NA	2	NA	1.34	1.34	NA	NA
Q96N67	608	DOCK7	DOCK7_C608	DOCK7_HUMAN Dedicator of cytokinesis protein 7 OS=Homo sapiens OX=9606 GN=DOCK7 PE=1 SV=4	#CSEFSK	#CSEFSK	1	1	1.23	1.45	1.34	0.155563	11.6092
O94915	372	FRYL	FRYL_C372	FRYL_HUMAN Protein furry homolog-like OS=Homo sapiens OX=9606 GN=FRYL PE=1 SV=2	#CESNTVTQSR	#CESNTVTQSR	1	2	1.21	1.47	1.34	0.183848	13.72
Q8N0U8	50	VKORC1L1	VKORC1L1_C50	VKORL_HUMAN Vitamin K epoxide reductase complex subunit 1-like protein 1 OS=Homo sapiens OX=9606 GN=VKORC1L1 PE=1 SV=2	#CDLGPWVK	#CDLGPWVK	1	2	1.46	1.21	1.335	0.176777	13.2417
Q1ED39	78	KNOP1	KNOP1_C78	KNOP1_HUMAN Lysine-rich nucleolar protein 1 OS=Homo sapiens OX=9606 GN=KNOP1 PE=1 SV=1	#CEEHVEPETTLPAR	#CEEHVEPETTLPAR	3	3	1.34	1.33	1.335	0.00707107	0.529668
Q5QJE6	464	DNTTIP2	DNTTIP2_C464	TDIF2_HUMAN Deoxynucleotidyltransferase terminal-interacting protein 2 OS=Homo sapiens OX=9606 GN=DNTTIP2 PE=1 SV=2	#CFVENSGQR	#CFVENSGQR	1	1	1.23	1.44	1.335	0.148492	11.123
P60981	23	DSTN	DSTN_C23	DEST_HUMAN Destrin OS=Homo sapiens OX=9606 GN=DSTN PE=1 SV=3	#CSTPEEIK #CSTPEEIKK	#CSTPEEIKK #CSTPEEIK	11	6	1.34	1.325	1.3325	0.0106066	0.795993
Q9NR46	326	SH3GLB2	SH3GLB2_C326	SHLB2_HUMAN Endophilin-B2 OS=Homo sapiens OX=9606 GN=SH3GLB2 PE=1 SV=1	#CLEEVAPPASGTR	#CLEEVAPPASGTR	2	2	1.52	1.14	1.33	0.268701	20.2031
O00410	986	IPO5	IPO5_C986	IPO5_HUMAN Importin-5 OS=Homo sapiens OX=9606 GN=IPO5 PE=1 SV=4	#CVNVEEVLPH	NA	1	NA	1.33	NA	1.33	NA	NA
P62263	31	RPS14	RPS14_C31	RS14_HUMAN 40S ribosomal protein S14 OS=Homo sapiens OX=9606 GN=RPS14 PE=1 SV=3	#CHIFASF	NA	1	NA	1.33	NA	1.33	NA	NA
Q14690	535	PDCD11	PDCD11_C535	RRP5_HUMAN Protein RRP5 homolog OS=Homo sapiens OX=9606 GN=PDCD11 PE=1 SV=3	#CYADAK	NA	1	NA	1.33	NA	1.33	NA	NA
Q9NY27	134	PPP4R2	PPP4R2_C134	PP4R2_HUMAN Serine/threonine-protein phosphatase 4 regulatory subunit 2 OS=Homo sapiens OX=9606 GN=PPP4R2 PE=1 SV=3	#CVYPSSEK	#CVYPSSEK	2	1	1.26	1.4	1.33	0.0989949	7.44323
Q93052	364	LPP	LPP_C364	LPP_HUMAN Lipoma-preferred partner OS=Homo sapiens OX=9606 GN=LPP PE=1 SV=1	NA	#CAPPLQPK	NA	3	NA	1.33	1.33	NA	NA
P12814	370	ACTN1	ACTN1_C370	ACTN1_HUMAN Alpha-actinin-1 OS=Homo sapiens OX=9606 GN=ACTN1 PE=1 SV=2	NA	#CLEQVEK	NA	2	NA	1.33	1.33	NA	NA
Q6N075	242	MFSD5	MFSD5_C242	MFSD5_HUMAN Molybdate-anion transporter OS=Homo sapiens OX=9606 GN=MFSD5 PE=1 SV=2	NA	#CLLSDR	NA	1	NA	1.33	1.33	NA	NA
Q15165	283	PON2	PON2_C283	PON2_HUMAN Serum paraoxonase/arylesterase 2 OS=Homo sapiens OX=9606 GN=PON2 PE=1 SV=4	NA	#CHPNGQK	NA	3	NA	1.33	1.33	NA	NA
Q14980	658	NUMA1	NUMA1_C658	NUMA1_HUMAN Nuclear mitotic apparatus protein 1 OS=Homo sapiens OX=9606 GN=NUMA1 PE=1 SV=2	NA	#CVETAR	NA	1	NA	1.33	1.33	NA	NA
Q9Y6N5	337	SQOR	SQOR_C337	SQOR_HUMAN Sulfide:quinone oxidoreductase, mitochondrial OS=Homo sapiens OX=9606 GN=SQOR PE=1 SV=1	#CTNLPTSK	#CTNLPTSK	2	2	1.285	1.365	1.325	0.0565685	4.26932
P45880	47	VDAC2	VDAC2_C47	VDAC2_HUMAN Voltage-dependent anion-selective channel protein 2 OS=Homo sapiens OX=9606 GN=VDAC2 PE=1 SV=2	#CSGVEFSTSGSSNTDTGK	#CSGVEFSTSGSSNTDTGK	8	4	1.32	1.32	1.32	0	0
Q9HAV4	765	XPO5	XPO5_C765	XPO5_HUMAN Exportin-5 OS=Homo sapiens OX=9606 GN=XPO5 PE=1 SV=1	#CTEQILK	NA	1	NA	1.32	NA	1.32	NA	NA
Q13042	544	CDC16	CDC16_C544	CDC16_HUMAN Cell division cycle protein 16 homolog OS=Homo sapiens OX=9606 GN=CDC16 PE=1 SV=2	#CYDFDVHTMK	NA	2	NA	1.32	NA	1.32	NA	NA
Q92547	1099	TOPBP1	TOPBP1_C1099	TOPB1_HUMAN DNA topoisomerase 2-binding protein 1 OS=Homo sapiens OX=9606 GN=TOPBP1 PE=1 SV=3	#CNSASSTPDSTR	NA	2	NA	1.32	NA	1.32	NA	NA
P43034	252	PAFAH1B1	PAFAH1B1_C252	LIS1_HUMAN Platelet-activating factor acetylhydrolase IB subunit alpha OS=Homo sapiens OX=9606 GN=PAFAH1B1 PE=1 SV=2	#CSNDQTVR	NA	1	NA	1.32	NA	1.32	NA	NA
Q96NU0	1203	CNTNAP3B	CNTNAP3B_C1203	CNT3B_HUMAN Contactin-associated protein-like 3B OS=Homo sapiens OX=9606 GN=CNTNAP3B PE=2 SV=3	#CAAGAASGSPAR	NA	1	NA	1.32	NA	1.32	NA	NA
Q9HC35	82	EML4	EML4_C82	EMAL4_HUMAN Echinoderm microtubule-associated protein-like 4 OS=Homo sapiens OX=9606 GN=EML4 PE=1 SV=3	#CITNGSGANR	NA	1	NA	1.32	NA	1.32	NA	NA
Q13155	291	AIMP2	AIMP2_C291	AIMP2_HUMAN Aminoacyl tRNA synthase complex-interacting multifunctional protein 2 OS=Homo sapiens OX=9606 GN=AIMP2 PE=1 SV=2	#CSVTVPANVQR	#CSVTVPANVQR	1	1	1.26	1.38	1.32	0.0848528	6.42824
Q96L21	105	RPL10L	RPL10L_C105	RL10L_HUMAN 60S ribosomal protein L10-like OS=Homo sapiens OX=9606 GN=RPL10L PE=1 SV=3	#CAGADRL	#CAGADRL	2	2	1.31	1.32	1.315	0.00707107	0.537724
Q9NRR3	11	CDC42SE2	CDC42SE2_C11	C42S2_HUMAN CDC42 small effector protein 2 OS=Homo sapiens OX=9606 GN=CDC42SE2 PE=1 SV=1	#CIAEQPQPK	#CIAEQPQPK	2	2	1.3	1.33	1.315	0.0212132	1.61317
P61978	132	HNRNPK	HNRNPK_C132	HNRPK_HUMAN Heterogeneous nuclear ribonucleoprotein K OS=Homo sapiens OX=9606 GN=HNRNPK PE=1 SV=1	#CLNYQHYK	#CLNYQHYK	2	1	1.59	1.03	1.31	0.39598	30.2275
Q6DN90	906	IQSEC1	IQSEC1_C906	IQEC1_HUMAN IQ motif and SEC7 domain-containing protein 1 OS=Homo sapiens OX=9606 GN=IQSEC1 PE=1 SV=1	#CLDDSYASGEGLK	NA	1	NA	1.31	NA	1.31	NA	NA
Q9BYG3	237	NIFK	NIFK_C237	MK67I_HUMAN MKI67 FHA domain-interacting nucleolar phosphoprotein OS=Homo sapiens OX=9606 GN=NIFK PE=1 SV=1	#CTPTFLER	NA	2	NA	1.31	NA	1.31	NA	NA
O94964	992	SOGA1	SOGA1_C992	SOGA1_HUMAN Protein SOGA1 OS=Homo sapiens OX=9606 GN=SOGA1 PE=1 SV=2	#CQDPPGR	NA	1	NA	1.31	NA	1.31	NA	NA
Q9ULD2	427	MTUS1	MTUS1_C427	MTUS1_HUMAN Microtubule-associated tumor suppressor 1 OS=Homo sapiens OX=9606 GN=MTUS1 PE=1 SV=2	NA	#CMSTPVLEPTK	NA	2	NA	1.31	1.31	NA	NA
Q9UGH3	406	SLC23A2	SLC23A2_C406	S23A2_HUMAN Solute carrier family 23 member 2 OS=Homo sapiens OX=9606 GN=SLC23A2 PE=1 SV=1	NA	#CAPPPPIHAINR	NA	1	NA	1.31	1.31	NA	NA
Q9H2D6	2280	TRIOBP	TRIOBP_C2280	TARA_HUMAN TRIO and F-actin-binding protein OS=Homo sapiens OX=9606 GN=TRIOBP PE=1 SV=3	NA	#CELEVLLR	NA	1	NA	1.31	1.31	NA	NA
O15446	107	CD3EAP	CD3EAP_C107	RPA34_HUMAN DNA-directed RNA polymerase I subunit RPA34 OS=Homo sapiens OX=9606 GN=CD3EAP PE=1 SV=1	NA	#CASAPQGTLR	NA	1	NA	1.31	1.31	NA	NA
Q13772	368	NCOA4	NCOA4_C368	NCOA4_HUMAN Nuclear receptor coactivator 4 OS=Homo sapiens OX=9606 GN=NCOA4 PE=1 SV=1	#CLNDHLEAK	#CLNDHLEAK	1	1	1.38	1.23	1.305	0.106066	8.12766
Q96EF6	114	FBXO17	FBXO17_C114	FBX17_HUMAN F-box only protein 17 OS=Homo sapiens OX=9606 GN=FBXO17 PE=1 SV=1	#CGEQGFR	#CGEQGFR	1	1	1.17	1.44	1.305	0.190919	14.6298
P17987	357	TCP1	TCP1_C357	TCPA_HUMAN T-complex protein 1 subunit alpha OS=Homo sapiens OX=9606 GN=TCP1 PE=1 SV=1	#CDDELILIK	#CDDELILIK	2	1	1.16	1.45	1.305	0.205061	15.7135
P78527	111	PRKDC	PRKDC_C111	PRKDC_HUMAN DNA-dependent protein kinase catalytic subunit OS=Homo sapiens OX=9606 GN=PRKDC PE=1 SV=3	#CTSVYTK	#CTSVYTK	2	2	1.14	1.47	1.305	0.233345	17.8809
P24390	29	KDELR1	KDELR1_C29	ERD21_HUMAN ER lumen protein-retaining receptor 1 OS=Homo sapiens OX=9606 GN=KDELR1 PE=1 SV=1	NA	#CAGISGK	NA	2	NA	1.305	1.305	NA	NA
Q9NZN5	518	ARHGEF12	ARHGEF12_C518	ARHGC_HUMAN Rho guanine nucleotide exchange factor 12 OS=Homo sapiens OX=9606 GN=ARHGEF12 PE=1 SV=1	#CAEQIVAK	NA	1	NA	1.3	NA	1.3	NA	NA
Q15024	34	EXOSC7	EXOSC7_C34	EXOS7_HUMAN Exosome complex component RRP42 OS=Homo sapiens OX=9606 GN=EXOSC7 PE=1 SV=3	#CVEVETDVVSNTSGSAR	NA	2	NA	1.3	NA	1.3	NA	NA
Q9ULG6	265	CCPG1	CCPG1_C265	CCPG1_HUMAN Cell cycle progression protein 1 OS=Homo sapiens OX=9606 GN=CCPG1 PE=1 SV=3	#CQQEQESFIDYK	NA	2	NA	1.3	NA	1.3	NA	NA
Q14318	274	FKBP8	FKBP8_C274	FKBP8_HUMAN Peptidyl-prolyl cis-trans isomerase FKBP8 OS=Homo sapiens OX=9606 GN=FKBP8 PE=1 SV=2	#CLNNLAASQLK	NA	2	NA	1.3	NA	1.3	NA	NA
Q63HN8	4456	RNF213	RNF213_C4456	RN213_HUMAN E3 ubiquitin-protein ligase RNF213 OS=Homo sapiens OX=9606 GN=RNF213 PE=1 SV=3	#CGQNELLEPLK	NA	1	NA	1.3	NA	1.3	NA	NA
P20810	661	CAST	CAST_C661	ICAL_HUMAN Calpastatin OS=Homo sapiens OX=9606 GN=CAST PE=1 SV=4	#CPSTTETSQNTAK	NA	3	NA	1.3	NA	1.3	NA	NA
Q69YU5	22	C12orf73	C12orf73_C22	CL073_HUMAN Uncharacterized protein C12orf73 OS=Homo sapiens OX=9606 GN=C12orf73 PE=3 SV=2	#CAGAEVVHR	NA	2	NA	1.3	NA	1.3	NA	NA
P08237	351	PFKM	PFKM_C351	PFKAM_HUMAN ATP-dependent 6-phosphofructokinase, muscle type OS=Homo sapiens OX=9606 GN=PFKM PE=1 SV=2	#CVQVTK	NA	1	NA	1.3	NA	1.3	NA	NA
O75509	560	TNFRSF21	TNFRSF21_C560	TNR21_HUMAN Tumor necrosis factor receptor superfamily member 21 OS=Homo sapiens OX=9606 GN=TNFRSF21 PE=1 SV=1	#CDSTSSGSSALSR	#CDSTSSGSSALSR	1	1	1.09	1.51	1.3	0.296985	22.845
P10644	18	PRKAR1A	PRKAR1A_C18	KAP0_HUMAN cAMP-dependent protein kinase type I-alpha regulatory subunit OS=Homo sapiens OX=9606 GN=PRKAR1A PE=1 SV=1	NA	#CELYVQK	NA	1	NA	1.3	1.3	NA	NA
Q5JTH9	326	RRP12	RRP12_C326	RRP12_HUMAN RRP12-like protein OS=Homo sapiens OX=9606 GN=RRP12 PE=1 SV=2	NA	#CSETLLR	NA	1	NA	1.3	1.3	NA	NA
Q9NVI1	1158	FANCI	FANCI_C1158	FANCI_HUMAN Fanconi anemia group I protein OS=Homo sapiens OX=9606 GN=FANCI PE=1 SV=4	NA	#CVDTILK	NA	2	NA	1.3	1.3	NA	NA
Q8N0U8	58	VKORC1L1	VKORC1L1_C58	VKORL_HUMAN Vitamin K epoxide reductase complex subunit 1-like protein 1 OS=Homo sapiens OX=9606 GN=VKORC1L1 PE=1 SV=2	#CSAALASR	#CSAALASR	1	2	1.43	1.16	1.295	0.190919	14.7428
Q96LD4	347	TRIM47	TRIM47_C347	TRI47_HUMAN E3 ubiquitin-protein ligase TRIM47 OS=Homo sapiens OX=9606 GN=TRIM47 PE=1 SV=2	#CGPGPGPPR	#CGPGPGPPR	2	1	0.81	1.78	1.295	0.685894	52.9648
Q13501	289	SQSTM1	SQSTM1_C289	SQSTM_HUMAN Sequestosome-1 OS=Homo sapiens OX=9606 GN=SQSTM1 PE=1 SV=1	#CCSDPSKPGGNVEGATQ	#CCSDPSKPGGNVEGA	1	1	1.38	1.2	1.29	0.127279	9.86661
P04920	16	SLC4A2	SLC4A2_C16	B3A2_HUMAN Anion exchange protein 2 OS=Homo sapiens OX=9606 GN=SLC4A2 PE=1 SV=4	#CTPEPESLGPGTPGFPEQEEDELHR	#CTPEPESLGPGTPGFPEQEEDELHR	2	3	1.33	1.25	1.29	0.0565685	4.38516
P78527	1335	PRKDC	PRKDC_C1335	PRKDC_HUMAN DNA-dependent protein kinase catalytic subunit OS=Homo sapiens OX=9606 GN=PRKDC PE=1 SV=3	#CTVVVR	#CTVVVR	1	1	1.31	1.27	1.29	0.0282843	2.19258
O00267	740	SUPT5H	SUPT5H_C740	SPT5H_HUMAN Transcription elongation factor SPT5 OS=Homo sapiens OX=9606 GN=SUPT5H PE=1 SV=1	#CQTISVDR	NA	1	NA	1.29	NA	1.29	NA	NA
Q96AW1	158	VOPP1	VOPP1_C158	VOPP1_HUMAN Vesicular, overexpressed in cancer, prosurvival protein 1 OS=Homo sapiens OX=9606 GN=VOPP1 PE=2 SV=1	#CNTPPPPYEQVVK	NA	1	NA	1.29	NA	1.29	NA	NA
Q9Y6M5	469	SLC30A1	SLC30A1_C469	ZNT1_HUMAN Zinc transporter 1 OS=Homo sapiens OX=9606 GN=SLC30A1 PE=1 SV=3	#CLELSNNLEK	NA	1	NA	1.29	NA	1.29	NA	NA
P62873	294	GNB1	GNB1_C294	GBB1_HUMAN Guanine nucleotide-binding protein G(I)/G(S)/G(T) subunit beta-1 OS=Homo sapiens OX=9606 GN=GNB1 PE=1 SV=3	#CNVWDALK	NA	1	NA	1.29	NA	1.29	NA	NA
Q9UBM7	368	DHCR7	DHCR7_C368	DHCR7_HUMAN 7-dehydrocholesterol reductase OS=Homo sapiens OX=9606 GN=DHCR7 PE=1 SV=1	#CLIWGR	#CLIWGR	1	1	1.24	1.34	1.29	0.0707107	5.48145
Q92888	815	ARHGEF1	ARHGEF1_C815	ARHG1_HUMAN Rho guanine nucleotide exchange factor 1 OS=Homo sapiens OX=9606 GN=ARHGEF1 PE=1 SV=2	NA	#CRPGPEGQLAAT	NA	1	NA	1.29	1.29	NA	NA
O75367	276	H2AFY	H2AFY_C276	H2AY_HUMAN Core histone macro-H2A.1 OS=Homo sapiens OX=9606 GN=H2AFY PE=1 SV=4	NA	#CNSPVWGADK	NA	1	NA	1.29	1.29	NA	NA
Q5VT52	1071	RPRD2	RPRD2_C1071	RPRD2_HUMAN Regulation of nuclear pre-mRNA domain-containing protein 2 OS=Homo sapiens OX=9606 GN=RPRD2 PE=1 SV=1	NA	#CLDLPDSTEEK	NA	2	NA	1.29	1.29	NA	NA
O15027	107	SEC16A	SEC16A_C107	SC16A_HUMAN Protein transport protein Sec16A OS=Homo sapiens OX=9606 GN=SEC16A PE=1 SV=4	NA	#CEPLPGPLTQPR	NA	1	NA	1.29	1.29	NA	NA
Q9Y256	158	RCE1	RCE1_C158	FACE2_HUMAN CAAX prenyl protease 2 OS=Homo sapiens OX=9606 GN=RCE1 PE=1 SV=1	NA	#CLTDMR	NA	1	NA	1.29	1.29	NA	NA
Q96I24	460	FUBP3	FUBP3_C460	FUBP3_HUMAN Far upstream element-binding protein 3 OS=Homo sapiens OX=9606 GN=FUBP3 PE=1 SV=2	#CFPNMAAK	#CFPNMAAK	2	1	1.475	1.09	1.2825	0.272236	21.227
P21333	2378	FLNA	FLNA_C2378	FLNA_HUMAN Filamin-A OS=Homo sapiens OX=9606 GN=FLNA PE=1 SV=4	#CYVTEIDQDK	#CYVTEIDQDK	2	1	1.31	1.25	1.28	0.0424264	3.31456
P29992	10	GNA11	GNA11_C10	GNA11_HUMAN Guanine nucleotide-binding protein subunit alpha-11 OS=Homo sapiens OX=9606 GN=GNA11 PE=1 SV=2	#CLSDEVK	NA	2	NA	1.28	NA	1.28	NA	NA
Q16401	133	PSMD5	PSMD5_C133	PSMD5_HUMAN 26S proteasome non-ATPase regulatory subunit 5 OS=Homo sapiens OX=9606 GN=PSMD5 PE=1 SV=3	#CIGGENLSVAK	#CIGGENLSVAK	2	2	1.28	1.28	1.28	0	0
P40926	128	MDH2	MDH2_C128	MDHM_HUMAN Malate dehydrogenase, mitochondrial OS=Homo sapiens OX=9606 GN=MDH2 PE=1 SV=3	#CAQHCPEAM	NA	1	NA	1.28	NA	1.28	NA	NA
Q9C0C9	341	UBE2O	UBE2O_C341	UBE2O_HUMAN (E3-independent) E2 ubiquitin-conjugating enzyme OS=Homo sapiens OX=9606 GN=UBE2O PE=1 SV=3	#CFDHAQR	NA	1	NA	1.28	NA	1.28	NA	NA
Q92945	379	KHSRP	KHSRP_C379	FUBP2_HUMAN Far upstream element-binding protein 2 OS=Homo sapiens OX=9606 GN=KHSRP PE=1 SV=4	NA	#CEHAAR	NA	1	NA	1.28	1.28	NA	NA
Q5T4S7	2554	UBR4	UBR4_C2554	UBR4_HUMAN E3 ubiquitin-protein ligase UBR4 OS=Homo sapiens OX=9606 GN=UBR4 PE=1 SV=1	NA	#CLNTSSK	NA	1	NA	1.28	1.28	NA	NA
O95453	169	PARN	PARN_C169	PARN_HUMAN Poly(A)-specific ribonuclease PARN OS=Homo sapiens OX=9606 GN=PARN PE=1 SV=1	#CPVTIPEDQKK #CPVTIPEDQK	#CPVTIPEDQKK #CPVTIPEDQK	2	8	1.385	1.165	1.275	0.155563	12.2011
P55011	791	SLC12A2	SLC12A2_C791	S12A2_HUMAN Solute carrier family 12 member 2 OS=Homo sapiens OX=9606 GN=SLC12A2 PE=1 SV=1	#CLVMTGAPNSR	#CLVMTGAPNSR	3	1	1.21	1.34	1.275	0.0919239	7.20972
P51659	425	HSD17B4	HSD17B4_C425	DHB4_HUMAN Peroxisomal multifunctional enzyme type 2 OS=Homo sapiens OX=9606 GN=HSD17B4 PE=1 SV=3	#CEAVVADVLDK	#CEAVVADVLDK	1	1	1	1.55	1.275	0.388909	30.5026
Q15003	239	NCAPH	NCAPH_C239	CND2_HUMAN Condensin complex subunit 2 OS=Homo sapiens OX=9606 GN=NCAPH PE=1 SV=3	#CEIDPMFQK	#CEIDPMFQK	2	3	1.3	1.24	1.27	0.0424264	3.34066
Q9H814	51	PHAX	PHAX_C51	PHAX_HUMAN Phosphorylated adapter RNA export protein OS=Homo sapiens OX=9606 GN=PHAX PE=1 SV=1	#CAPVSHY	NA	2	NA	1.27	NA	1.27	NA	NA
Q02817	712	MUC2	MUC2_C712	MUC2_HUMAN Mucin-2 OS=Homo sapiens OX=9606 GN=MUC2 PE=1 SV=2	#CVPIAK	NA	1	NA	1.27	NA	1.27	NA	NA
Q9NYL2	22	MAP3K20	MAP3K20_C22	M3K20_HUMAN Mitogen-activated protein kinase kinase kinase 20 OS=Homo sapiens OX=9606 GN=MAP3K20 PE=1 SV=3	#CGGGSFGSVYR	NA	2	NA	1.27	NA	1.27	NA	NA
P07814	744	EPRS	EPRS_C744	SYEP_HUMAN Bifunctional glutamate/proline--tRNA ligase OS=Homo sapiens OX=9606 GN=EPRS PE=1 SV=5	#CTTSEDSLVLYNR	#CTTSEDSLVLYNR	2	6	1.27	1.27	1.27	0	0
P24928	1470	POLR2A	POLR2A_C1470	RPB1_HUMAN DNA-directed RNA polymerase II subunit RPB1 OS=Homo sapiens OX=9606 GN=POLR2A PE=1 SV=2	#CFDLLLDAEK	#CFDLLLDAEK	1	2	1.27	1.27	1.27	0	0
Q96RU2	478	USP28	USP28_C478	UBP28_HUMAN Ubiquitin carboxyl-terminal hydrolase 28 OS=Homo sapiens OX=9606 GN=USP28 PE=1 SV=1	#CSVSDQTSK	NA	1	NA	1.27	NA	1.27	NA	NA
Q5T1M5	1031	FKBP15	FKBP15_C1031	FKB15_HUMAN FK506-binding protein 15 OS=Homo sapiens OX=9606 GN=FKBP15 PE=1 SV=2	#CIPSHR	NA	3	NA	1.27	NA	1.27	NA	NA
P08865	148	RPSA	RPSA_C148	RSSA_HUMAN 40S ribosomal protein SA OS=Homo sapiens OX=9606 GN=RPSA PE=1 SV=4	#CNTDSPLR	#CNTDSPLR	3	3	1.25	1.29	1.27	0.0282843	2.22711
O75044	873	SRGAP2	SRGAP2_C873	SRGP2_HUMAN SLIT-ROBO Rho GTPase-activating protein 2 OS=Homo sapiens OX=9606 GN=SRGAP2 PE=1 SV=3	#CRPSSQPIMSQ	#CRPSSQPIMSQ	1	2	1.22	1.32	1.27	0.0707107	5.56777
O43815	765	STRN	STRN_C765	STRN_HUMAN Striatin OS=Homo sapiens OX=9606 GN=STRN PE=1 SV=4	#CYIASAGADALAK	#CYIASAGADALAK	2	2	0.98	1.56	1.27	0.410122	32.2931
P13716	223	ALAD	ALAD_C223	HEM2_HUMAN Delta-aminolevulinic acid dehydratase OS=Homo sapiens OX=9606 GN=ALAD PE=1 SV=1	#CYQLPPGAR	#CYQLPPGAR	1	1	0.97	1.57	1.27	0.424264	33.4066
Q9Y5E3	329	PCDHB6	PCDHB6_C329	PCDB6_HUMAN Protocadherin beta-6 OS=Homo sapiens OX=9606 GN=PCDHB6 PE=2 SV=1	NA	#CSLVVR	NA	1	NA	1.27	1.27	NA	NA
Q63HN8	1156	RNF213	RNF213_C1156	RN213_HUMAN E3 ubiquitin-protein ligase RNF213 OS=Homo sapiens OX=9606 GN=RNF213 PE=1 SV=3	NA	#CVDSLLK	NA	1	NA	1.27	1.27	NA	NA
Q14738	346	PPP2R5D	PPP2R5D_C346	2A5D_HUMAN Serine/threonine-protein phosphatase 2A 56 kDa regulatory subunit delta isoform OS=Homo sapiens OX=9606 GN=PPP2R5D PE=1 SV=1	NA	#CVVQFLEK	NA	1	NA	1.27	1.27	NA	NA
Q9UHD8	531	SEPTIN9	SEPTIN9_C531	SEPT9_HUMAN Septin-9 OS=Homo sapiens OX=9606 GN=SEPTIN9 PE=1 SV=2	#CEFAYLR	#CEFAYLR	2	1	1.5	1.03	1.265	0.33234	26.272
Q27J81	650	INF2	INF2_C650	INF2_HUMAN Inverted formin-2 OS=Homo sapiens OX=9606 GN=INF2 PE=1 SV=2	#CSNEEVAAMIR	#CSNEEVAAMIR	4	4	1.41	1.12	1.265	0.205061	16.2104
O14929	376	HAT1	HAT1_C376	HAT1_HUMAN Histone acetyltransferase type B catalytic subunit OS=Homo sapiens OX=9606 GN=HAT1 PE=1 SV=1	#CLRPEELTNQ	#CLRPEELTNQ	2	2	1.41	1.12	1.265	0.205061	16.2104
Q15149	850	PLEC	PLEC_C850	PLEC_HUMAN Plectin OS=Homo sapiens OX=9606 GN=PLEC PE=1 SV=3	#CIEAHLK	NA	2	NA	1.265	NA	1.265	NA	NA
Q8IUC4	657	RHPN2	RHPN2_C657	RHPN2_HUMAN Rhophilin-2 OS=Homo sapiens OX=9606 GN=RHPN2 PE=1 SV=1	#CLPSVGAAR #CLPSVGAARPQ	#CLPSVGAAR #CLPSVGAARPQ	5	4	1.5	1.025	1.2625	0.335876	26.604
Q9Y2H0	864	DLGAP4	DLGAP4_C864	DLGP4_HUMAN Disks large-associated protein 4 OS=Homo sapiens OX=9606 GN=DLGAP4 PE=1 SV=3	#CEQNLNPDANPR	#CEQNLNPDANPR	2	2	1.21	1.315	1.2625	0.0742462	5.88089
Q8IY17	418	PNPLA6	PNPLA6_C418	PLPL6_HUMAN Neuropathy target esterase OS=Homo sapiens OX=9606 GN=PNPLA6 PE=1 SV=3	#CVSMPGDISGLQGGPR	#CVSMPGDISGLQGGPR	1	2	1.3	1.22	1.26	0.0565685	4.48957
Q8TC12	33	RDH11	RDH11_C33	RDH11_HUMAN Retinol dehydrogenase 11 OS=Homo sapiens OX=9606 GN=RDH11 PE=1 SV=2	#CTSTVQLPGK	NA	2	NA	1.26	NA	1.26	NA	NA
O15438	5	ABCC3	ABCC3_C5	MRP3_HUMAN Canalicular multispecific organic anion transporter 2 OS=Homo sapiens OX=9606 GN=ABCC3 PE=1 SV=3	#CGSGELGSK	NA	2	NA	1.26	NA	1.26	NA	NA
O95372	213	LYPLA2	LYPLA2_C213	LYPA2_HUMAN Acyl-protein thioesterase 2 OS=Homo sapiens OX=9606 GN=LYPLA2 PE=1 SV=1	#CPQEMAAVK	#CPQEMAAVK	1	2	1.12	1.4	1.26	0.19799	15.7135
Q9Y277	2	VDAC3	VDAC3_C2	VDAC3_HUMAN Voltage-dependent anion-selective channel protein 3 OS=Homo sapiens OX=9606 GN=VDAC3 PE=1 SV=1	NA	#CNTPTYCDLGK	NA	1	NA	1.26	1.26	NA	NA
P55209	255	NAP1L1	NAP1L1_C255	NP1L1_HUMAN Nucleosome assembly protein 1-like 1 OS=Homo sapiens OX=9606 GN=NAP1L1 PE=1 SV=1	NA	#CTGCQIDWK	NA	2	NA	1.26	1.26	NA	NA
P35520	370	CBS	CBS_C370	CBS_HUMAN Cystathionine beta-synthase OS=Homo sapiens OX=9606 GN=CBS PE=1 SV=2	NA	#CVVILPDSVR	NA	2	NA	1.26	1.26	NA	NA
Q03111	479	MLLT1	MLLT1_C479	ENL_HUMAN Protein ENL OS=Homo sapiens OX=9606 GN=MLLT1 PE=1 SV=2	NA	#CSKPEK	NA	1	NA	1.26	1.26	NA	NA
Q8IYQ7	82	THNSL1	THNSL1_C82	THNS1_HUMAN Threonine synthase-like 1 OS=Homo sapiens OX=9606 GN=THNSL1 PE=1 SV=2	NA	#CVIDVDDDILEK	NA	2	NA	1.26	1.26	NA	NA
Q6ZWT7	505	MBOAT2	MBOAT2_C505	MBOA2_HUMAN Lysophospholipid acyltransferase 2 OS=Homo sapiens OX=9606 GN=MBOAT2 PE=2 SV=2	NA	#CNQNQEIASR	NA	2	NA	1.26	1.26	NA	NA
Q96FX8	4	PERP	PERP_C4	PERP_HUMAN p53 apoptosis effector related to PMP-22 OS=Homo sapiens OX=9606 GN=PERP PE=2 SV=1	NA	#CGLACER	NA	1	NA	1.26	1.26	NA	NA
Q63HN8	701	RNF213	RNF213_C701	RN213_HUMAN E3 ubiquitin-protein ligase RNF213 OS=Homo sapiens OX=9606 GN=RNF213 PE=1 SV=3	NA	#CMELAPR	NA	2	NA	1.26	1.26	NA	NA
P46734	29	MAP2K3	MAP2K3_C29	MP2K3_HUMAN Dual specificity mitogen-activated protein kinase kinase 3 OS=Homo sapiens OX=9606 GN=MAP2K3 PE=1 SV=2	#CMSKPPAPNPTPPR	#CMSKPPAPNPTPPR	2	1	1.075	1.44	1.2575	0.258094	20.5244
Q9NTK5	55	OLA1	OLA1_C55	OLA1_HUMAN Obg-like ATPase 1 OS=Homo sapiens OX=9606 GN=OLA1 PE=1 SV=2	#CTIDPNESR	#CTIDPNESR	1	2	0.93	1.58	1.255	0.459619	36.6231
Q9Y490	1353	TLN1	TLN1_C1353	TLN1_HUMAN Talin-1 OS=Homo sapiens OX=9606 GN=TLN1 PE=1 SV=3	#CTQQAPGQK	NA	2	NA	1.255	NA	1.255	NA	NA
P49327	634	FASN	FASN_C634	FAS_HUMAN Fatty acid synthase OS=Homo sapiens OX=9606 GN=FASN PE=1 SV=3	#CPPGVVPACHNSK	NA	2	NA	1.255	NA	1.255	NA	NA
Q93009	315	USP7	USP7_C315	UBP7_HUMAN Ubiquitin carboxyl-terminal hydrolase 7 OS=Homo sapiens OX=9606 GN=USP7 PE=1 SV=2	#CVEGTIPK	#CVEGTIPK	1	1	1.25	1.26	1.255	0.00707107	0.563432
O96013	276	PAK4	PAK4_C276	PAK4_HUMAN Serine/threonine-protein kinase PAK 4 OS=Homo sapiens OX=9606 GN=PAK4 PE=1 SV=1	#CTPAAPAVPGPPGPR	#CTPAAPAVPGPPGPR	3	5	1.24	1.27	1.255	0.0212132	1.6903
Q14004	80	CDK13	CDK13_C80	CDK13_HUMAN Cyclin-dependent kinase 13 OS=Homo sapiens OX=9606 GN=CDK13 PE=1 SV=2	#CFSPGPPLEVK	#CFSPGPPLEVK	2	2	1.035	1.475	1.255	0.311127	24.791
O14980	585	XPO1	XPO1_C585	XPO1_HUMAN Exportin-1 OS=Homo sapiens OX=9606 GN=XPO1 PE=1 SV=1	#CDTFIK	#CDTFIK	2	1	1.02	1.49	1.255	0.33234	26.4813
Q00341	948	HDLBP	HDLBP_C948	VIGLN_HUMAN Vigilin OS=Homo sapiens OX=9606 GN=HDLBP PE=1 SV=2	#CDIIIISGR	#CDIIIISGR	1	2	1.33	1.175	1.2525	0.109602	8.75062
Q15149	3110	PLEC	PLEC_C3110	PLEC_HUMAN Plectin OS=Homo sapiens OX=9606 GN=PLEC PE=1 SV=3	#CFEGLR	#CFEGLR	1	2	1.42	1.08	1.25	0.240416	19.2333
Q14839	493	CHD4	CHD4_C493	CHD4_HUMAN Chromodomain-helicase-DNA-binding protein 4 OS=Homo sapiens OX=9606 GN=CHD4 PE=1 SV=2	#CTCPALK	NA	1	NA	1.25	NA	1.25	NA	NA
Q09666	108	AHNAK	AHNAK_C108	AHNK_HUMAN Neuroblast differentiation-associated protein AHNAK OS=Homo sapiens OX=9606 GN=AHNAK PE=1 SV=2	#CSSEVVLSGDDEEYQR	NA	2	NA	1.25	NA	1.25	NA	NA
Q6ZWJ8	902	KCP	KCP_C902	KCP_HUMAN Kielin/chordin-like protein OS=Homo sapiens OX=9606 GN=KCP PE=2 SV=3	#CISQGR	NA	2	NA	1.25	NA	1.25	NA	NA
Q7Z5G4	24	GOLGA7	GOLGA7_C24	GOGA7_HUMAN Golgin subfamily A member 7 OS=Homo sapiens OX=9606 GN=GOLGA7 PE=1 SV=2	#CQFQTK	NA	1	NA	1.25	NA	1.25	NA	NA
Q9UID3	190	VPS51	VPS51_C190	VPS51_HUMAN Vacuolar protein sorting-associated protein 51 homolog OS=Homo sapiens OX=9606 GN=VPS51 PE=1 SV=2	#CVELGAYGQAVR	#CVELGAYGQAVR	1	1	1.24	1.26	1.25	0.0141421	1.13137
O43379	1176	WDR62	WDR62_C1176	WDR62_HUMAN WD repeat-containing protein 62 OS=Homo sapiens OX=9606 GN=WDR62 PE=1 SV=4	#CVPASSVLPTDR	#CVPASSVLPTDR	2	1	1.23	1.27	1.25	0.0282843	2.26274
Q13613	12	MTMR1	MTMR1_C12	MTMR1_HUMAN Myotubularin-related protein 1 OS=Homo sapiens OX=9606 GN=MTMR1 PE=1 SV=4	#CEGGGGPNPGPAGGR	#CEGGGGPNPGPAGGR	1	1	1.1	1.4	1.25	0.212132	16.9706
Q9UH92	159	MLX	MLX_C159	MLX_HUMAN Max-like protein X OS=Homo sapiens OX=9606 GN=MLX PE=1 SV=2	#CQQQDFSIGSQK	#CQQQDFSIGSQK	2	1	0.97	1.53	1.25	0.39598	31.6784
P83436	174	COG7	COG7_C174	COG7_HUMAN Conserved oligomeric Golgi complex subunit 7 OS=Homo sapiens OX=9606 GN=COG7 PE=1 SV=1	NA	#CVHLEALK	NA	1	NA	1.25	1.25	NA	NA
P53041	77	PPP5C	PPP5C_C77	PPP5_HUMAN Serine/threonine-protein phosphatase 5 OS=Homo sapiens OX=9606 GN=PPP5C PE=1 SV=1	NA	#CYGYALGDATR	NA	1	NA	1.25	1.25	NA	NA
Q8IWB7	401	WDFY1	WDFY1_C401	WDFY1_HUMAN WD repeat and FYVE domain-containing protein 1 OS=Homo sapiens OX=9606 GN=WDFY1 PE=1 SV=1	NA	#CSLATGFSPH	NA	1	NA	1.25	1.25	NA	NA
Q68CZ2	928	TNS3	TNS3_C928	TENS3_HUMAN Tensin-3 OS=Homo sapiens OX=9606 GN=TNS3 PE=1 SV=2	NA	#CTISSNGPGQR	NA	1	NA	1.25	1.25	NA	NA
Q9ULP9	8	TBC1D24	TBC1D24_C8	TBC24_HUMAN TBC1 domain family member 24 OS=Homo sapiens OX=9606 GN=TBC1D24 PE=1 SV=2	NA	#CFVDKDK	NA	2	NA	1.25	1.25	NA	NA
Q13427	310	PPIG	PPIG_C310	PPIG_HUMAN Peptidyl-prolyl cis-trans isomerase G OS=Homo sapiens OX=9606 GN=PPIG PE=1 SV=2	#CNPPNSQPASYQR	#CNPPNSQPASYQR	1	1	1.42	1.07	1.245	0.247487	19.8785
P49841	14	GSK3B	GSK3B_C14	GSK3B_HUMAN Glycogen synthase kinase-3 beta OS=Homo sapiens OX=9606 GN=GSK3B PE=1 SV=2	#CKPVQQPSAF	#CKPVQQPSAF	2	1	1.26	1.23	1.245	0.0212132	1.70387
Q15020	670	SART3	SART3_C670	SART3_HUMAN Squamous cell carcinoma antigen recognized by T-cells 3 OS=Homo sapiens OX=9606 GN=SART3 PE=1 SV=1	#CAAVDVEPPSK	#CAAVDVEPPSK	5	3	1.46	1.02	1.24	0.311127	25.0909
Q9Y314	8	NOSIP	NOSIP_C8	NOSIP_HUMAN Nitric oxide synthase-interacting protein OS=Homo sapiens OX=9606 GN=NOSIP PE=1 SV=1	#CTAGAVYTYHEK	NA	2	NA	1.24	NA	1.24	NA	NA
Q9Y618	1503	NCOR2	NCOR2_C1503	NCOR2_HUMAN Nuclear receptor corepressor 2 OS=Homo sapiens OX=9606 GN=NCOR2 PE=1 SV=3	#CYEESLK	NA	1	NA	1.24	NA	1.24	NA	NA
Q9Y263	666	PLAA	PLAA_C666	PLAP_HUMAN Phospholipase A-2-activating protein OS=Homo sapiens OX=9606 GN=PLAA PE=1 SV=2	#CFVGQAGQK	NA	2	NA	1.24	NA	1.24	NA	NA
P78527	2093	PRKDC	PRKDC_C2093	PRKDC_HUMAN DNA-dependent protein kinase catalytic subunit OS=Homo sapiens OX=9606 GN=PRKDC PE=1 SV=3	#CMAPLTALVK	NA	1	NA	1.24	NA	1.24	NA	NA
P98170	12	XIAP	XIAP_C12	XIAP_HUMAN E3 ubiquitin-protein ligase XIAP OS=Homo sapiens OX=9606 GN=XIAP PE=1 SV=2	#CVPADINKEEEFVEEFNR	NA	1	NA	1.24	NA	1.24	NA	NA
Q9C0C2	1175	TNKS1BP1	TNKS1BP1_C1175	TB182_HUMAN 182 kDa tankyrase-1-binding protein OS=Homo sapiens OX=9606 GN=TNKS1BP1 PE=1 SV=4	#CVGSGGSSEAR	NA	1	NA	1.24	NA	1.24	NA	NA
Q9NX02	588	NLRP2	NLRP2_C588	NALP2_HUMAN NACHT, LRR and PYD domains-containing protein 2 OS=Homo sapiens OX=9606 GN=NLRP2 PE=1 SV=1	#CDISCK	NA	1	NA	1.24	NA	1.24	NA	NA
P48643	253	CCT5	CCT5_C253	TCPE_HUMAN T-complex protein 1 subunit epsilon OS=Homo sapiens OX=9606 GN=CCT5 PE=1 SV=1	#CPFEPPKPK	#CPFEPPKPK	3	6	1.19	1.29	1.24	0.0707107	5.70247
Q5T8P6	53	RBM26	RBM26_C53	RBM26_HUMAN RNA-binding protein 26 OS=Homo sapiens OX=9606 GN=RBM26 PE=1 SV=3	#CIDQLDVFLQK	#CIDQLDVFLQK	2	1	1.15	1.33	1.24	0.127279	10.2645
Q6P3X3	299	TTC27	TTC27_C299	TTC27_HUMAN Tetratricopeptide repeat protein 27 OS=Homo sapiens OX=9606 GN=TTC27 PE=1 SV=1	NA	#CEFTPAPTPQEHLTK	NA	1	NA	1.24	1.24	NA	NA
O95789	821	ZMYM6	ZMYM6_C821	ZMYM6_HUMAN Zinc finger MYM-type protein 6 OS=Homo sapiens OX=9606 GN=ZMYM6 PE=1 SV=2	NA	#CIIVEK	NA	1	NA	1.24	1.24	NA	NA
Q01082	1970	SPTBN1	SPTBN1_C1970	SPTB2_HUMAN Spectrin beta chain, non-erythrocytic 1 OS=Homo sapiens OX=9606 GN=SPTBN1 PE=1 SV=2	NA	#CIELGK	NA	1	NA	1.24	1.24	NA	NA
O75152	209	ZC3H11A	ZC3H11A_C209	ZC11A_HUMAN Zinc finger CCCH domain-containing protein 11A OS=Homo sapiens OX=9606 GN=ZC3H11A PE=1 SV=3	NA	#CLNFGIK	NA	1	NA	1.24	1.24	NA	NA
Q16718	17	NDUFA5	NDUFA5_C17	NDUA5_HUMAN NADH dehydrogenase [ubiquinone] 1 alpha subcomplex subunit 5 OS=Homo sapiens OX=9606 GN=NDUFA5 PE=1 SV=3	NA	#CNTPHER	NA	1	NA	1.24	1.24	NA	NA
O75410	174	TACC1	TACC1_C174	TACC1_HUMAN Transforming acidic coiled-coil-containing protein 1 OS=Homo sapiens OX=9606 GN=TACC1 PE=1 SV=2	#CVTAVSGK	#CVTAVSGK	1	1	1.37	1.1	1.235	0.190919	15.459
P04899	112	GNAI2	GNAI2_C112	GNAI2_HUMAN Guanine nucleotide-binding protein G(i) subunit alpha-2 OS=Homo sapiens OX=9606 GN=GNAI2 PE=1 SV=3	#CTAEEQGVLPDDLSGVIR	#CTAEEQGVLPDDLSGVIR	1	1	1.28	1.19	1.235	0.0636396	5.153
Q15021	1229	NCAPD2	NCAPD2_C1229	CND1_HUMAN Condensin complex subunit 1 OS=Homo sapiens OX=9606 GN=NCAPD2 PE=1 SV=3	#CVSQLPLTER	#CVSQLPLTER	2	1	1.05	1.42	1.235	0.26163	21.1846
O43824	394	GTPBP6	GTPBP6_C394	GTPB6_HUMAN Putative GTP-binding protein 6 OS=Homo sapiens OX=9606 GN=GTPBP6 PE=2 SV=4	#CSVLSTLR	#CSVLSTLR	1	2	1.24	1.22	1.23	0.0141421	1.14977
Q9NPD3	97	EXOSC4	EXOSC4_C97	EXOS4_HUMAN Exosome complex component RRP41 OS=Homo sapiens OX=9606 GN=EXOSC4 PE=1 SV=3	#CEMGLQLR	NA	1	NA	1.23	NA	1.23	NA	NA
Q9Y4R8	30	TELO2	TELO2_C30	TELO2_HUMAN Telomere length regulation protein TEL2 homolog OS=Homo sapiens OX=9606 GN=TELO2 PE=1 SV=2	#CTLESLK	NA	1	NA	1.23	NA	1.23	NA	NA
P12236	129	SLC25A6	SLC25A6_C129	ADT3_HUMAN ADP/ATP translocase 3 OS=Homo sapiens OX=9606 GN=SLC25A6 PE=1 SV=4	#CFVYPLDFAR	NA	2	NA	1.23	NA	1.23	NA	NA
P30048	60	PRDX3	PRDX3_C60	PRDX3_HUMAN Thioredoxin-dependent peroxide reductase, mitochondrial OS=Homo sapiens OX=9606 GN=PRDX3 PE=1 SV=3	#CHAPAVTQH #CHAPAVT	NA	3	NA	1.23	NA	1.23	NA	NA
Q15021	286	NCAPD2	NCAPD2_C286	CND1_HUMAN Condensin complex subunit 1 OS=Homo sapiens OX=9606 GN=NCAPD2 PE=1 SV=3	#CPQELSR	NA	1	NA	1.23	NA	1.23	NA	NA
Q53T59	287	HS1BP3	HS1BP3_C287	H1BP3_HUMAN HCLS1-binding protein 3 OS=Homo sapiens OX=9606 GN=HS1BP3 PE=1 SV=1	#CESGGPTPSLSHR	NA	1	NA	1.23	NA	1.23	NA	NA
Q7LBC6	1357	KDM3B	KDM3B_C1357	KDM3B_HUMAN Lysine-specific demethylase 3B OS=Homo sapiens OX=9606 GN=KDM3B PE=1 SV=2	#CNLTDTQK	NA	2	NA	1.23	NA	1.23	NA	NA
Q7Z417	234	NUFIP2	NUFIP2_C234	NUFP2_HUMAN Nuclear fragile X mental retardation-interacting protein 2 OS=Homo sapiens OX=9606 GN=NUFIP2 PE=1 SV=1	#CENLNIVQDK	#CENLNIVQDK	1	2	1.15	1.31	1.23	0.113137	9.19814
P48960	802	CD97	CD97_C802	CD97_HUMAN CD97 antigen OS=Homo sapiens OX=9606 GN=CD97 PE=1 SV=4	NA	#CLVAGGSK	NA	1	NA	1.23	1.23	NA	NA
O60934	119	NBN	NBN_C119	NBN_HUMAN Nibrin OS=Homo sapiens OX=9606 GN=NBN PE=1 SV=1	NA	#CLDVSGK	NA	1	NA	1.23	1.23	NA	NA
Q03001	3737	DST	DST_C3737	DYST_HUMAN Dystonin OS=Homo sapiens OX=9606 GN=DST PE=1 SV=4	NA	#CEQLNLK	NA	1	NA	1.23	1.23	NA	NA
Q9NY65	295	TUBA8	TUBA8_C295	TBA8_HUMAN Tubulin alpha-8 chain OS=Homo sapiens OX=9606 GN=TUBA8 PE=1 SV=1	NA	#CFEPNSQMVK	NA	1	NA	1.23	1.23	NA	NA
P51798	211	CLCN7	CLCN7_C211	CLCN7_HUMAN H(+)/Cl(-) exchange transporter 7 OS=Homo sapiens OX=9606 GN=CLCN7 PE=1 SV=2	NA	#CFLNGVK	NA	1	NA	1.23	1.23	NA	NA
Q6PCE3	303	PGM2L1	PGM2L1_C303	PGM2L_HUMAN Glucose 1,6-bisphosphate synthase OS=Homo sapiens OX=9606 GN=PGM2L1 PE=1 SV=3	NA	#CPNPEEGESVLELSLR	NA	1	NA	1.23	1.23	NA	NA
P21964	145	COMT	COMT_C145	COMT_HUMAN Catechol O-methyltransferase OS=Homo sapiens OX=9606 GN=COMT PE=1 SV=2	NA	#CAAITQR	NA	2	NA	1.23	1.23	NA	NA
Q9NR09	613	BIRC6	BIRC6_C613	BIRC6_HUMAN Baculoviral IAP repeat-containing protein 6 OS=Homo sapiens OX=9606 GN=BIRC6 PE=1 SV=2	#CTNSELNSPLVR	#CTNSELNSPLVR	1	1	1.23	1.22	1.225	0.00707107	0.57723
Q13418	257	ILK	ILK_C257	ILK_HUMAN Integrin-linked protein kinase OS=Homo sapiens OX=9606 GN=ILK PE=1 SV=2	#CQSPPAPHPT	NA	2	NA	1.225	NA	1.225	NA	NA
P43243	230	MATR3	MATR3_C230	MATR3_HUMAN Matrin-3 OS=Homo sapiens OX=9606 GN=MATR3 PE=1 SV=2	#CRDDSFFGETS	#CRDDSFFGETS #CRDDSFFGET	3	5	1.14	1.31	1.225	0.120208	9.81291
P50851	2675	LRBA	LRBA_C2675	LRBA_HUMAN Lipopolysaccharide-responsive and beige-like anchor protein OS=Homo sapiens OX=9606 GN=LRBA PE=1 SV=4	#CSGIGDNPGSETAAPR	#CSGIGDNPGSETAAPR	2	2	1.25	1.195	1.2225	0.0388909	3.18126
Q02543	22	RPL18A	RPL18A_C22	RL18A_HUMAN 60S ribosomal protein L18a OS=Homo sapiens OX=9606 GN=RPL18A PE=1 SV=2	#CHTPPLYR	#CHTPPLYR	10	12	1.215	1.23	1.2225	0.0106066	0.867616
Q15149	317	PLEC	PLEC_C317	PLEC_HUMAN Plectin OS=Homo sapiens OX=9606 GN=PLEC PE=1 SV=3	#CDNFTSSWR	#CDNFTSSWR	1	2	1.27	1.17	1.22	0.0707107	5.79596
P10620	50	MGST1	MGST1_C50	MGST1_HUMAN Microsomal glutathione S-transferase 1 OS=Homo sapiens OX=9606 GN=MGST1 PE=1 SV=1	#CVAFGK	#CVAFGK	6	13	1.24	1.2	1.22	0.0282843	2.31838
Q15424	362	SAFB	SAFB_C362	SAFB1_HUMAN Scaffold attachment factor B1 OS=Homo sapiens OX=9606 GN=SAFB PE=1 SV=4	#CNEVPPAPK	NA	5	NA	1.22	NA	1.22	NA	NA
Q3L8U1	993	CHD9	CHD9_C993	CHD9_HUMAN Chromodomain-helicase-DNA-binding protein 9 OS=Homo sapiens OX=9606 GN=CHD9 PE=1 SV=2	#CVIIDEAHR	NA	1	NA	1.22	NA	1.22	NA	NA
Q4J6C6	227	PREPL	PREPL_C227	PPCEL_HUMAN Prolyl endopeptidase-like OS=Homo sapiens OX=9606 GN=PREPL PE=1 SV=1	#CHDVYR	NA	4	NA	1.22	NA	1.22	NA	NA
O15156	23	ZBTB7B	ZBTB7B_C23	ZBT7B_HUMAN Zinc finger and BTB domain-containing protein 7B OS=Homo sapiens OX=9606 GN=ZBTB7B PE=1 SV=2	#CLNEQR	NA	2	NA	1.22	NA	1.22	NA	NA
Q14974	543	KPNB1	KPNB1_C543	IMB1_HUMAN Importin subunit beta-1 OS=Homo sapiens OX=9606 GN=KPNB1 PE=1 SV=2	#CYPAVQK	#CYPAVQK	1	2	1.13	1.31	1.22	0.127279	10.4327
Q8NF37	514	LPCAT1	LPCAT1_C514	PCAT1_HUMAN Lysophosphatidylcholine acyltransferase 1 OS=Homo sapiens OX=9606 GN=LPCAT1 PE=1 SV=2	NA	#CADFSPENSDAGR	NA	2	NA	1.22	1.22	NA	NA
P50416	608	CPT1A	CPT1A_C608	CPT1A_HUMAN Carnitine O-palmitoyltransferase 1, liver isoform OS=Homo sapiens OX=9606 GN=CPT1A PE=1 SV=2	NA	#CTTESCDFVR	NA	2	NA	1.22	1.22	NA	NA
P49721	163	PSMB2	PSMB2_C163	PSB2_HUMAN Proteasome subunit beta type-2 OS=Homo sapiens OX=9606 GN=PSMB2 PE=1 SV=1	NA	#CLEELQK	NA	1	NA	1.22	1.22	NA	NA
P78527	1629	PRKDC	PRKDC_C1629	PRKDC_HUMAN DNA-dependent protein kinase catalytic subunit OS=Homo sapiens OX=9606 GN=PRKDC PE=1 SV=3	NA	#CDSWWAK	NA	3	NA	1.22	1.22	NA	NA
O43663	80	PRC1	PRC1_C80	PRC1_HUMAN Protein regulator of cytokinesis 1 OS=Homo sapiens OX=9606 GN=PRC1 PE=1 SV=2	NA	#CSELHVEPF	NA	2	NA	1.22	1.22	NA	NA
P30084	149	ECHS1	ECHS1_C149	ECHM_HUMAN Enoyl-CoA hydratase, mitochondrial OS=Homo sapiens OX=9606 GN=ECHS1 PE=1 SV=4	#CDIIYAGEK	#CDIIYAGEK	3	1	1.34	1.09	1.215	0.176777	14.5495
P15924	174	DSP	DSP_C174	DESP_HUMAN Desmoplakin OS=Homo sapiens OX=9606 GN=DSP PE=1 SV=3	#CQSGSGWDEFTK	#CQSGSGWDEFTK	2	2	1.29	1.14	1.215	0.106066	8.72971
Q6YHU6	1126	THADA	THADA_C1126	THADA_HUMAN Thyroid adenoma-associated protein OS=Homo sapiens OX=9606 GN=THADA PE=1 SV=1	#CPNVSLQK	#CPNVSLQK	2	2	1.365	1.06	1.2125	0.215668	17.787
Q32MZ4	14	LRRFIP1	LRRFIP1_C14	LRRF1_HUMAN Leucine-rich repeat flightless-interacting protein 1 OS=Homo sapiens OX=9606 GN=LRRFIP1 PE=1 SV=2	#CLSPEAQK	NA	2	NA	1.21	NA	1.21	NA	NA
P05556	466	ITGB1	ITGB1_C466	ITB1_HUMAN Integrin beta-1 OS=Homo sapiens OX=9606 GN=ITGB1 PE=1 SV=2	#CQSEGIPESPK	NA	1	NA	1.21	NA	1.21	NA	NA
P20290	22	BTF3	BTF3_C22	BTF3_HUMAN Transcription factor BTF3 OS=Homo sapiens OX=9606 GN=BTF3 PE=1 SV=1	#CPGGEATLSQPPPR	NA	2	NA	1.21	NA	1.21	NA	NA
P22102	202	GART	GART_C202	PUR2_HUMAN Trifunctional purine biosynthetic protein adenosine-3 OS=Homo sapiens OX=9606 GN=GART PE=1 SV=1	#CFTDGK	NA	1	NA	1.21	NA	1.21	NA	NA
P49753	76	ACOT2	ACOT2_C76	ACOT2_HUMAN Acyl-coenzyme A thioesterase 2, mitochondrial OS=Homo sapiens OX=9606 GN=ACOT2 PE=1 SV=6	#CWDEPVR	NA	2	NA	1.21	NA	1.21	NA	NA
O00567	384	NOP56	NOP56_C384	NOP56_HUMAN Nucleolar protein 56 OS=Homo sapiens OX=9606 GN=NOP56 PE=1 SV=4	#CFSEVPTSVFGEK	NA	1	NA	1.21	NA	1.21	NA	NA
Q6ZSR9	251		_C251	YJ005_HUMAN Uncharacterized protein FLJ45252 OS=Homo sapiens OX=9606 PE=2 SV=2	#CLESGGHSNDR	NA	2	NA	1.21	NA	1.21	NA	NA
Q7L7V1	329	DHX32	DHX32_C329	DHX32_HUMAN Putative pre-mRNA-splicing factor ATP-dependent RNA helicase DHX32 OS=Homo sapiens OX=9606 GN=DHX32 PE=1 SV=1	#CQVYQR	NA	1	NA	1.21	NA	1.21	NA	NA
O95297	203	MPZL1	MPZL1_C203	MPZL1_HUMAN Myelin protein zero-like protein 1 OS=Homo sapiens OX=9606 GN=MPZL1 PE=1 SV=1	NA	#CSTSESLSPVK	NA	1	NA	1.21	1.21	NA	NA
Q6ZV73	1003	FGD6	FGD6_C1003	FGD6_HUMAN FYVE, RhoGEF and PH domain-containing protein 6 OS=Homo sapiens OX=9606 GN=FGD6 PE=1 SV=2	NA	#CANLALK	NA	1	NA	1.21	1.21	NA	NA
P50991	295	CCT4	CCT4_C295	TCPD_HUMAN T-complex protein 1 subunit delta OS=Homo sapiens OX=9606 GN=CCT4 PE=1 SV=4	NA	#CNVLLIQK	NA	1	NA	1.21	1.21	NA	NA
O75794	170	CDC123	CDC123_C170	CD123_HUMAN Cell division cycle protein 123 homolog OS=Homo sapiens OX=9606 GN=CDC123 PE=1 SV=1	NA	#CELIPGAEFR	NA	1	NA	1.21	1.21	NA	NA
Q9BSD7	110	NTPCR	NTPCR_C110	NTPCR_HUMAN Cancer-related nucleoside-triphosphatase OS=Homo sapiens OX=9606 GN=NTPCR PE=1 SV=1	#CVIDEIGK	#CVIDEIGK	1	2	1.44	0.97	1.205	0.33234	27.5801
Q15021	121	NCAPD2	NCAPD2_C121	CND1_HUMAN Condensin complex subunit 1 OS=Homo sapiens OX=9606 GN=NCAPD2 PE=1 SV=3	#CYALIR	#CYALIR	1	1	1.22	1.19	1.205	0.0212132	1.76043
Q15654	54	TRIP6	TRIP6_C54	TRIP6_HUMAN Thyroid receptor-interacting protein 6 OS=Homo sapiens OX=9606 GN=TRIP6 PE=1 SV=3	#CYQAPGGPEDR	#CYQAPGGPEDR	3	2	1.21	1.2	1.205	0.00707107	0.586811
Q9HBM0	41	VEZT	VEZT_C41	VEZA_HUMAN Vezatin OS=Homo sapiens OX=9606 GN=VEZT PE=1 SV=3	#CTTEGQQKPPTR	#CTTEGQQKPPTR	4	1	1.145	1.26	1.2025	0.0813173	6.76235
Q9BSJ8	635	ESYT1	ESYT1_C635	ESYT1_HUMAN Extended synaptotagmin-1 OS=Homo sapiens OX=9606 GN=ESYT1 PE=1 SV=1	#CHTTPDSQFGTEHVLR	#CHTTPDSQFGTEHVLR	1	1	1.09	1.31	1.2	0.155563	12.9636
P51812	229	RPS6KA3	RPS6KA3_C229	KS6A3_HUMAN Ribosomal protein S6 kinase alpha-3 OS=Homo sapiens OX=9606 GN=RPS6KA3 PE=1 SV=1	#CGTVEYMAPEVVNR	NA	1	NA	1.2	NA	1.2	NA	NA
Q8N3V7	396	SYNPO	SYNPO_C396	SYNPO_HUMAN Synaptopodin OS=Homo sapiens OX=9606 GN=SYNPO PE=1 SV=2	#CSTLLIDK	NA	1	NA	1.2	NA	1.2	NA	NA
P14868	349	DARS	DARS_C349	SYDC_HUMAN Aspartate--tRNA ligase, cytoplasmic OS=Homo sapiens OX=9606 GN=DARS PE=1 SV=2	#CEALAMLR	NA	1	NA	1.2	NA	1.2	NA	NA
Q6ZV73	463	FGD6	FGD6_C463	FGD6_HUMAN FYVE, RhoGEF and PH domain-containing protein 6 OS=Homo sapiens OX=9606 GN=FGD6 PE=1 SV=2	#CNEHLQSGR	NA	1	NA	1.2	NA	1.2	NA	NA
P52306	117	RAP1GDS1	RAP1GDS1_C117	GDS1_HUMAN Rap1 GTPase-GDP dissociation stimulator 1 OS=Homo sapiens OX=9606 GN=RAP1GDS1 PE=1 SV=3	#CYDSHEGR	NA	1	NA	1.2	NA	1.2	NA	NA
Q5TBB1	7	RNASEH2B	RNASEH2B_C7	RNH2B_HUMAN Ribonuclease H2 subunit B OS=Homo sapiens OX=9606 GN=RNASEH2B PE=1 SV=1	#CGDGVGAR	NA	1	NA	1.2	NA	1.2	NA	NA
Q9P2F9	451	ZNF319	ZNF319_C451	ZN319_HUMAN Zinc finger protein 319 OS=Homo sapiens OX=9606 GN=ZNF319 PE=1 SV=2	#CAAAEKPLR	NA	1	NA	1.2	NA	1.2	NA	NA
O75369	2501	FLNB	FLNB_C2501	FLNB_HUMAN Filamin-B OS=Homo sapiens OX=9606 GN=FLNB PE=1 SV=2	NA	#CYSAIPK	NA	1	NA	1.2	1.2	NA	NA
Q9P2R3	34	ANKFY1	ANKFY1_C34	ANFY1_HUMAN Rabankyrin-5 OS=Homo sapiens OX=9606 GN=ANKFY1 PE=1 SV=2	NA	#CALLAAQANK	NA	1	NA	1.2	1.2	NA	NA
Q9Y4B5	507	MTCL1	MTCL1_C507	MTCL1_HUMAN Microtubule cross-linking factor 1 OS=Homo sapiens OX=9606 GN=MTCL1 PE=1 SV=5	NA	#CQLQFAK	NA	1	NA	1.2	1.2	NA	NA
Q00839	453	HNRNPU	HNRNPU_C453	HNRPU_HUMAN Heterogeneous nuclear ribonucleoprotein U OS=Homo sapiens OX=9606 GN=HNRNPU PE=1 SV=6	NA	#CAVEFNFGQK	NA	1	NA	1.2	1.2	NA	NA
P27708	1455	CAD	CAD_C1455	PYR1_HUMAN CAD protein OS=Homo sapiens OX=9606 GN=CAD PE=1 SV=3	NA	#CMTSQK	NA	2	NA	1.2	1.2	NA	NA
Q9UIG0	338	BAZ1B	BAZ1B_C338	BAZ1B_HUMAN Tyrosine-protein kinase BAZ1B OS=Homo sapiens OX=9606 GN=BAZ1B PE=1 SV=2	NA	#CHVHLK	NA	2	NA	1.2	1.2	NA	NA
Q9C0B1	171	FTO	FTO_C171	FTO_HUMAN Alpha-ketoglutarate-dependent dioxygenase FTO OS=Homo sapiens OX=9606 GN=FTO PE=1 SV=3	#CMSADFPR	#CMSADFPR	3	5	1.14	1.25	1.195	0.0777817	6.50893
O76071	234	CIAO1	CIAO1_C234	CIAO1_HUMAN Probable cytosolic iron-sulfur protein assembly protein CIAO1 OS=Homo sapiens OX=9606 GN=CIAO1 PE=1 SV=1	#CSGSDPSWK	#CSGSDPSWK	2	2	1.23	1.155	1.1925	0.053033	4.44721
Q9Y4X5	161	ARIH1	ARIH1_C161	ARI1_HUMAN E3 ubiquitin-protein ligase ARIH1 OS=Homo sapiens OX=9606 GN=ARIH1 PE=1 SV=2	#CHVINPSK	#CHVINPSK	3	1	1.45	0.93	1.19	0.367696	30.8988
O00154	117	ACOT7	ACOT7_C117	BACH_HUMAN Cytosolic acyl coenzyme A thioester hydrolase OS=Homo sapiens OX=9606 GN=ACOT7 PE=1 SV=3	#CIGEVAHVS	#CIGEVAHVS	1	2	1.43	0.95	1.19	0.339411	28.522
P49591	438	SARS	SARS_C438	SYSC_HUMAN Serine--tRNA ligase, cytoplasmic OS=Homo sapiens OX=9606 GN=SARS PE=1 SV=3	#CAILENYQTEK	NA	1	NA	1.19	NA	1.19	NA	NA
O00194	123	RAB27B	RAB27B_C123	RB27B_HUMAN Ras-related protein Rab-27B OS=Homo sapiens OX=9606 GN=RAB27B PE=1 SV=4	#CENPDIVLIGNK	NA	1	NA	1.19	NA	1.19	NA	NA
P51610	1357	HCFC1	HCFC1_C1357	HCFC1_HUMAN Host cell factor 1 OS=Homo sapiens OX=9606 GN=HCFC1 PE=1 SV=2	#CETHQTTSTGTTM	NA	2	NA	1.19	NA	1.19	NA	NA
Q7Z3U7	373	MON2	MON2_C373	MON2_HUMAN Protein MON2 homolog OS=Homo sapiens OX=9606 GN=MON2 PE=1 SV=3	#CQSYDMK	NA	2	NA	1.19	NA	1.19	NA	NA
P10586	1610	PTPRF	PTPRF_C1610	PTPRF_HUMAN Receptor-type tyrosine-protein phosphatase F OS=Homo sapiens OX=9606 GN=PTPRF PE=1 SV=2	#CGHTEVPAR	NA	1	NA	1.19	NA	1.19	NA	NA
Q9H479	24	FN3K	FN3K_C24	FN3K_HUMAN Fructosamine-3-kinase OS=Homo sapiens OX=9606 GN=FN3K PE=1 SV=1	#CISEGR	NA	1	NA	1.19	NA	1.19	NA	NA
Q15061	175	WDR43	WDR43_C175	WDR43_HUMAN WD repeat-containing protein 43 OS=Homo sapiens OX=9606 GN=WDR43 PE=1 SV=3	#CISPDGK	NA	1	NA	1.19	NA	1.19	NA	NA
Q8NE86	191	MCU	MCU_C191	MCU_HUMAN Calcium uniporter protein, mitochondrial OS=Homo sapiens OX=9606 GN=MCU PE=1 SV=1	#CIEQHQLNK	#CIEQHQLNK	1	1	1.03	1.35	1.19	0.226274	19.0146
Q9BQ70	216	TCF25	TCF25_C216	TCF25_HUMAN Transcription factor 25 OS=Homo sapiens OX=9606 GN=TCF25 PE=1 SV=1	NA	#CTWLTTPK	NA	2	NA	1.19	1.19	NA	NA
Q9NYH9	524	UTP6	UTP6_C524	UTP6_HUMAN U3 small nucleolar RNA-associated protein 6 homolog OS=Homo sapiens OX=9606 GN=UTP6 PE=2 SV=2	NA	#CNMANIR	NA	1	NA	1.19	1.19	NA	NA
Q14008	1317	CKAP5	CKAP5_C1317	CKAP5_HUMAN Cytoskeleton-associated protein 5 OS=Homo sapiens OX=9606 GN=CKAP5 PE=1 SV=3	#CLVYPASK	#CLVYPASK	2	1	1.29	1.08	1.185	0.148492	12.531
Q13428	1012	TCOF1	TCOF1_C1012	TCOF_HUMAN Treacle protein OS=Homo sapiens OX=9606 GN=TCOF1 PE=1 SV=3	#CLTPGIR	#CLTPGIR	2	2	1.35	1.015	1.1825	0.236881	20.0322
Q9NZM1	275	MYOF	MYOF_C275	MYOF_HUMAN Myoferlin OS=Homo sapiens OX=9606 GN=MYOF PE=1 SV=1	#CLMGEFK	#CLMGEFK	4	6	1.185	1.18	1.1825	0.00353553	0.298988
P62633	98	CNBP	CNBP_C98	CNBP_HUMAN Cellular nucleic acid-binding protein OS=Homo sapiens OX=9606 GN=CNBP PE=1 SV=1	#CYNCGK	#CYNCGK	1	1	1.78	0.58	1.18	0.848528	71.9092
P41162	81	ETV3	ETV3_C81	ETV3_HUMAN ETS translocation variant 3 OS=Homo sapiens OX=9606 GN=ETV3 PE=1 SV=2	#CKPQMNYDK	#CKPQMNYDK	4	1	1.19	1.17	1.18	0.0141421	1.19849
Q9UGP4	374	LIMD1	LIMD1_C374	LIMD1_HUMAN LIM domain-containing protein 1 OS=Homo sapiens OX=9606 GN=LIMD1 PE=1 SV=1	#CTDLGTGPK	NA	1	NA	1.18	NA	1.18	NA	NA
Q969V6	509	MRTFA	MRTFA_C509	MRTFA_HUMAN Myocardin-related transcription factor A OS=Homo sapiens OX=9606 GN=MRTFA PE=1 SV=1	#CLSPGGR	NA	2	NA	1.18	NA	1.18	NA	NA
P61764	552	STXBP1	STXBP1_C552	STXB1_HUMAN Syntaxin-binding protein 1 OS=Homo sapiens OX=9606 GN=STXBP1 PE=1 SV=1	#CAYEVTQANGK	NA	1	NA	1.18	NA	1.18	NA	NA
Q05397	459	PTK2	PTK2_C459	FAK1_HUMAN Focal adhesion kinase 1 OS=Homo sapiens OX=9606 GN=PTK2 PE=1 SV=2	#CTSDSVR	NA	1	NA	1.18	NA	1.18	NA	NA
Q12802	1414	AKAP13	AKAP13_C1414	AKP13_HUMAN A-kinase anchor protein 13 OS=Homo sapiens OX=9606 GN=AKAP13 PE=1 SV=2	NA	#CENFLDVGLGR	NA	1	NA	1.18	1.18	NA	NA
Q8WX93	837	PALLD	PALLD_C837	PALLD_HUMAN Palladin OS=Homo sapiens OX=9606 GN=PALLD PE=1 SV=3	NA	#CSSPATR	NA	1	NA	1.18	1.18	NA	NA
Q14573	1183	ITPR3	ITPR3_C1183	ITPR3_HUMAN Inositol 1,4,5-trisphosphate receptor type 3 OS=Homo sapiens OX=9606 GN=ITPR3 PE=1 SV=2	NA	#CGVGEQMR	NA	1	NA	1.18	1.18	NA	NA
P78527	25	PRKDC	PRKDC_C25	PRKDC_HUMAN DNA-dependent protein kinase catalytic subunit OS=Homo sapiens OX=9606 GN=PRKDC PE=1 SV=3	#CGAALAGH	#CGAALAGHQLIR #CGAALAGH	2	5	1.165	1.19	1.1775	0.0176777	1.50129
Q8IWP9	108	CCDC28A	CCDC28A_C108	CC28A_HUMAN Coiled-coil domain-containing protein 28A OS=Homo sapiens OX=9606 GN=CCDC28A PE=1 SV=1	#CTQVVNAK	NA	2	NA	1.175	NA	1.175	NA	NA
O00220	336	TNFRSF10A	TNFRSF10A_C336	TR10A_HUMAN Tumor necrosis factor receptor superfamily member 10A OS=Homo sapiens OX=9606 GN=TNFRSF10A PE=1 SV=3	#CLLGPAEAEGSQR	#CLLGPAEAEGSQR	3	1	1.17	1.18	1.175	0.00707107	0.601793
Q14203	1252	DCTN1	DCTN1_C1252	DCTN1_HUMAN Dynactin subunit 1 OS=Homo sapiens OX=9606 GN=DCTN1 PE=1 SV=3	#CAAGFGQR	#CAAGFGQR	1	2	1.16	1.19	1.175	0.0212132	1.80538
Q14694	254	USP10	USP10_C254	UBP10_HUMAN Ubiquitin carboxyl-terminal hydrolase 10 OS=Homo sapiens OX=9606 GN=USP10 PE=1 SV=2	#CFPAEAGR	#CFPAEAGR	1	2	1.14	1.21	1.175	0.0494975	4.21255
Q7L576	1241	CYFIP1	CYFIP1_C1241	CYFP1_HUMAN Cytoplasmic FMR1-interacting protein 1 OS=Homo sapiens OX=9606 GN=CYFIP1 PE=1 SV=1	#CFQPPIHQS #CFQPPIHQ	#CFQPPIHQS #CFQPPIHQ #CFQPPIHQSLASS	4	5	1.185	1.16	1.1725	0.0176777	1.50769
Q15149	1098	PLEC	PLEC_C1098	PLEC_HUMAN Plectin OS=Homo sapiens OX=9606 GN=PLEC PE=1 SV=3	#CSHHYQQLLQ	#CSHHYQQLLQ #CSHHYQQ	1	4	1.15	1.195	1.1725	0.0318198	2.71384
Q8NB16	184	MLKL	MLKL_C184	MLKL_HUMAN Mixed lineage kinase domain-like protein OS=Homo sapiens OX=9606 GN=MLKL PE=1 SV=1	#CMQEIPQEQIK	#CMQEIPQEQIK	4	1	1.105	1.24	1.1725	0.0954594	8.14153
P14923	33	JUP	JUP_C33	PLAK_HUMAN Junction plakoglobin OS=Homo sapiens OX=9606 GN=JUP PE=1 SV=3	#CVPSVSSK	#CVPSVSSK	2	2	1.32	1.02	1.17	0.212132	18.1309
Q9NV70	566	EXOC1	EXOC1_C566	EXOC1_HUMAN Exocyst complex component 1 OS=Homo sapiens OX=9606 GN=EXOC1 PE=1 SV=4	#CGTPLPVSSEK	NA	2	NA	1.17	NA	1.17	NA	NA
Q9Y490	243	TLN1	TLN1_C243	TLN1_HUMAN Talin-1 OS=Homo sapiens OX=9606 GN=TLN1 PE=1 SV=3	#CQIQFGPHNEQK	NA	1	NA	1.17	NA	1.17	NA	NA
P49736	315	MCM2	MCM2_C315	MCM2_HUMAN DNA replication licensing factor MCM2 OS=Homo sapiens OX=9606 GN=MCM2 PE=1 SV=4	#CTGVLPQLSMVK	NA	1	NA	1.17	NA	1.17	NA	NA
Q03701	282	CEBPZ	CEBPZ_C282	CEBPZ_HUMAN CCAAT/enhancer-binding protein zeta OS=Homo sapiens OX=9606 GN=CEBPZ PE=1 SV=3	#CLMALDTFK	NA	1	NA	1.17	NA	1.17	NA	NA
O75369	1280	FLNB	FLNB_C1280	FLNB_HUMAN Filamin-B OS=Homo sapiens OX=9606 GN=FLNB PE=1 SV=2	#CFVTDNADGTYQVEYTPFEK	NA	1	NA	1.17	NA	1.17	NA	NA
Q15942	387	ZYX	ZYX_C387	ZYX_HUMAN Zyxin OS=Homo sapiens OX=9606 GN=ZYX PE=1 SV=1	#CHQPLAR	NA	1	NA	1.17	NA	1.17	NA	NA
P20701	777	ITGAL	ITGAL_C777	ITAL_HUMAN Integrin alpha-L OS=Homo sapiens OX=9606 GN=ITGAL PE=1 SV=3	#CEANLR	NA	1	NA	1.17	NA	1.17	NA	NA
Q04656	185	ATP7A	ATP7A_C185	ATP7A_HUMAN Copper-transporting ATPase 1 OS=Homo sapiens OX=9606 GN=ATP7A PE=1 SV=4	#CTSTIEGK	NA	1	NA	1.17	NA	1.17	NA	NA
Q9BZF1	617	OSBPL8	OSBPL8_C617	OSBL8_HUMAN Oxysterol-binding protein-related protein 8 OS=Homo sapiens OX=9606 GN=OSBPL8 PE=1 SV=3	#CVNQISGK	NA	2	NA	1.17	NA	1.17	NA	NA
P12268	468	IMPDH2	IMPDH2_C468	IMDH2_HUMAN Inosine-5'-monophosphate dehydrogenase 2 OS=Homo sapiens OX=9606 GN=IMPDH2 PE=1 SV=2	#CQDIGAK	#CQDIGAK	5	3	1.12	1.22	1.17	0.0707107	6.04365
P46013	3014	MKI67	MKI67_C3014	KI67_HUMAN Proliferation marker protein Ki-67 OS=Homo sapiens OX=9606 GN=MKI67 PE=1 SV=2	#CMPAPEEIVEELPASK	#CMPAPEEIVEELPASK	2	1	1.07	1.27	1.17	0.141421	12.0873
Q68CZ2	842	TNS3	TNS3_C842	TENS3_HUMAN Tensin-3 OS=Homo sapiens OX=9606 GN=TNS3 PE=1 SV=2	#CSTPAFPVSPETPYVK	#CSTPAFPVSPETPYVK	2	1	0.98	1.36	1.17	0.268701	22.9659
Q5VYK3	1183	ECPAS	ECPAS_C1183	ECM29_HUMAN Proteasome adapter and scaffold protein ECM29 OS=Homo sapiens OX=9606 GN=ECPAS PE=1 SV=2	NA	#CLALNDLLR	NA	1	NA	1.17	1.17	NA	NA
P31040	190	SDHA	SDHA_C190	SDHA_HUMAN Succinate dehydrogenase [ubiquinone] flavoprotein subunit, mitochondrial OS=Homo sapiens OX=9606 GN=SDHA PE=1 SV=2	NA	#CCVADR	NA	1	NA	1.17	1.17	NA	NA
Q12789	1704	GTF3C1	GTF3C1_C1704	TF3C1_HUMAN General transcription factor 3C polypeptide 1 OS=Homo sapiens OX=9606 GN=GTF3C1 PE=1 SV=4	#CLPDTFTK	#CLPDTFTK	2	2	1.24	1.095	1.1675	0.10253	8.78205
Q02543	16	RPL18A	RPL18A_C16	RL18A_HUMAN 60S ribosomal protein L18a OS=Homo sapiens OX=9606 GN=RPL18A PE=1 SV=2	#CLPTPK	#CLPTPK	5	4	1.17	1.165	1.1675	0.00353553	0.302829
P46013	958	MKI67	MKI67_C958	KI67_HUMAN Proliferation marker protein Ki-67 OS=Homo sapiens OX=9606 GN=MKI67 PE=1 SV=2	#CAPMSDLTDLK	#CAPMSDLTDLK	2	3	1.045	1.29	1.1675	0.173241	14.8386
Q96C19	53	EFHD2	EFHD2_C53	EFHD2_HUMAN EF-hand domain-containing protein D2 OS=Homo sapiens OX=9606 GN=EFHD2 PE=1 SV=1	#CELSAK	#CELSAK	3	2	1.18	1.15	1.165	0.0212132	1.82088
Q92616	329	GCN1	GCN1_C329	GCN1_HUMAN eIF-2-alpha kinase activator GCN1 OS=Homo sapiens OX=9606 GN=GCN1 PE=1 SV=6	#CSDSSAMESLTK	#CSDSSAMESLTK	4	5	1.13	1.2	1.165	0.0494975	4.24871
Q9UBF2	44	COPG2	COPG2_C44	COPG2_HUMAN Coatomer subunit gamma-2 OS=Homo sapiens OX=9606 GN=COPG2 PE=1 SV=1	#CLHILTK	#CLHILTK	2	2	1.08	1.25	1.165	0.120208	10.3183
Q13501	290	SQSTM1	SQSTM1_C290	SQSTM_HUMAN Sequestosome-1 OS=Homo sapiens OX=9606 GN=SQSTM1 PE=1 SV=1	#CSDPSKPGGNVEGATQSLAEQMR #CSDPSKPGGN #CSDPSKPG #CSDPSKPGGNVEG #CSDPSKPGGNVEGATQS #CSDPSKPGGNVEGATQ #CSDPSKPGGNVEGA	#CSDPSKPGGNVEGATQSLAEQMR #CSDPSKPGGN #CSDPSKPGGNVEGATQ	16	13	1.165	1.16	1.1625	0.00353553	0.304132
Q02750	277	MAP2K1	MAP2K1_C277	MP2K1_HUMAN Dual specificity mitogen-activated protein kinase kinase 1 OS=Homo sapiens OX=9606 GN=MAP2K1 PE=1 SV=2	#CQVEGDAAETPPRPR	#CQVEGDAAETPPRPR	2	2	1.115	1.21	1.1625	0.0671751	5.77851
P54136	34	RARS	RARS_C34	SYRC_HUMAN Arginine--tRNA ligase, cytoplasmic OS=Homo sapiens OX=9606 GN=RARS PE=1 SV=2	#CLGASPNLEQLQEENLK	#CLGASPNLEQLQEENLK	1	2	1.28	1.04	1.16	0.169706	14.6298
Q9H074	72	PAIP1	PAIP1_C72	PAIP1_HUMAN Polyadenylate-binding protein-interacting protein 1 OS=Homo sapiens OX=9606 GN=PAIP1 PE=1 SV=1	#CEVPASPQR #CEVPASPQ #CEVPASPQRPSR	#CEVPASPQ #CEVPASPQR	5	3	1.19	1.13	1.16	0.0424264	3.65745
Q9BUM1	269	G6PC3	G6PC3_C269	G6PC3_HUMAN Glucose-6-phosphatase 3 OS=Homo sapiens OX=9606 GN=G6PC3 PE=1 SV=2	#CYAQVR	NA	2	NA	1.16	NA	1.16	NA	NA
Q9P2E3	421	ZNFX1	ZNFX1_C421	ZNFX1_HUMAN NFX1-type zinc finger-containing protein 1 OS=Homo sapiens OX=9606 GN=ZNFX1 PE=2 SV=2	#CSSSGIVYK	NA	1	NA	1.16	NA	1.16	NA	NA
Q9Y2F5	228	ICE1	ICE1_C228	ICE1_HUMAN Little elongation complex subunit 1 OS=Homo sapiens OX=9606 GN=ICE1 PE=1 SV=5	#CVPEKPAK	NA	1	NA	1.16	NA	1.16	NA	NA
Q15154	582	PCM1	PCM1_C582	PCM1_HUMAN Pericentriolar material 1 protein OS=Homo sapiens OX=9606 GN=PCM1 PE=1 SV=5	#CEINNR	NA	1	NA	1.16	NA	1.16	NA	NA
Q04637	1306	EIF4G1	EIF4G1_C1306	IF4G1_HUMAN Eukaryotic translation initiation factor 4 gamma 1 OS=Homo sapiens OX=9606 GN=EIF4G1 PE=1 SV=4	#CAGHLSTAQ	NA	1	NA	1.16	NA	1.16	NA	NA
O43149	2553	ZZEF1	ZZEF1_C2553	ZZEF1_HUMAN Zinc finger ZZ-type and EF-hand domain-containing protein 1 OS=Homo sapiens OX=9606 GN=ZZEF1 PE=1 SV=6	#CDQATAESNPVTQK	NA	1	NA	1.16	NA	1.16	NA	NA
Q12888	1178	TP53BP1	TP53BP1_C1178	TP53B_HUMAN TP53-binding protein 1 OS=Homo sapiens OX=9606 GN=TP53BP1 PE=1 SV=2	NA	#CEQGTSTVDQNFGK	NA	1	NA	1.16	1.16	NA	NA
Q96K76	767	USP47	USP47_C767	UBP47_HUMAN Ubiquitin carboxyl-terminal hydrolase 47 OS=Homo sapiens OX=9606 GN=USP47 PE=1 SV=3	NA	#CYNDLR	NA	1	NA	1.16	1.16	NA	NA
Q99832	450	CCT7	CCT7_C450	TCPH_HUMAN T-complex protein 1 subunit eta OS=Homo sapiens OX=9606 GN=CCT7 PE=1 SV=2	NA	#CDNAGFDATNILNK	NA	1	NA	1.16	1.16	NA	NA
Q9BW04	338	SARG	SARG_C338	SARG_HUMAN Specifically androgen-regulated gene protein OS=Homo sapiens OX=9606 GN=SARG PE=1 SV=2	NA	#CSLQEQR	NA	2	NA	1.16	1.16	NA	NA
Q9BY77	338	POLDIP3	POLDIP3_C338	PDIP3_HUMAN Polymerase delta-interacting protein 3 OS=Homo sapiens OX=9606 GN=POLDIP3 PE=1 SV=2	#CLDGQPMK	#CLDGQPMK	3	2	1.33	0.985	1.1575	0.243952	21.0758
Q16576	97	RBBP7	RBBP7_C97	RBBP7_HUMAN Histone-binding protein RBBP7 OS=Homo sapiens OX=9606 GN=RBBP7 PE=1 SV=1	#CDSDKGEFGGFGSVT	#CDSDKGEFGGFGSVTGK	2	4	1.28	1.03	1.155	0.176777	15.3053
P07195	36	LDHB	LDHB_C36	LDHB_HUMAN L-lactate dehydrogenase B chain OS=Homo sapiens OX=9606 GN=LDHB PE=1 SV=2	#CAISILGK	#CAISILGK	1	2	1.19	1.12	1.155	0.0494975	4.2855
P11216	326	PYGB	PYGB_C326	PYGB_HUMAN Glycogen phosphorylase, brain form OS=Homo sapiens OX=9606 GN=PYGB PE=1 SV=5	#CFETFPDK	#CFETFPDK	5	4	1.01	1.295	1.1525	0.201525	17.4859
Q9H2P0	76	ADNP	ADNP_C76	ADNP_HUMAN Activity-dependent neuroprotector homeobox protein OS=Homo sapiens OX=9606 GN=ADNP PE=1 SV=1	#CSACPFSSK	NA	1	NA	1.15	NA	1.15	NA	NA
Q9Y4A5	2449	TRRAP	TRRAP_C2449	TRRAP_HUMAN Transformation/transcription domain-associated protein OS=Homo sapiens OX=9606 GN=TRRAP PE=1 SV=3	#CAQPLIR	NA	1	NA	1.15	NA	1.15	NA	NA
P19367	813	HK1	HK1_C813	HXK1_HUMAN Hexokinase-1 OS=Homo sapiens OX=9606 GN=HK1 PE=1 SV=3	#CDDSIIVK	NA	2	NA	1.15	NA	1.15	NA	NA
A6ND36	8	FAM83G	FAM83G_C8	FA83G_HUMAN Protein FAM83G OS=Homo sapiens OX=9606 GN=FAM83G PE=1 SV=2	#CLDDNHVNWR	NA	1	NA	1.15	NA	1.15	NA	NA
Q96GA3	215	LTV1	LTV1_C215	LTV1_HUMAN Protein LTV1 homolog OS=Homo sapiens OX=9606 GN=LTV1 PE=1 SV=1	#CMSVPGK	NA	1	NA	1.15	NA	1.15	NA	NA
Q9UPN3	7245	MACF1	MACF1_C7245	MACF1_HUMAN Microtubule-actin cross-linking factor 1, isoforms 1/2/3/5 OS=Homo sapiens OX=9606 GN=MACF1 PE=1 SV=4	#CTSMPSSPATPASGTK	NA	2	NA	1.15	NA	1.15	NA	NA
Q8IVQ6	219	ZDHHC21	ZDHHC21_C219	ZDH21_HUMAN Palmitoyltransferase ZDHHC21 OS=Homo sapiens OX=9606 GN=ZDHHC21 PE=2 SV=1	#CEDISRPR	NA	1	NA	1.15	NA	1.15	NA	NA
Q86U90	99	YRDC	YRDC_C99	YRDC_HUMAN YrdC domain-containing protein, mitochondrial OS=Homo sapiens OX=9606 GN=YRDC PE=1 SV=1	#CSAALR	NA	1	NA	1.15	NA	1.15	NA	NA
Q5VZ89	1105	DENND4C	DENND4C_C1105	DEN4C_HUMAN DENN domain-containing protein 4C OS=Homo sapiens OX=9606 GN=DENND4C PE=1 SV=3	#CHLPDSR	NA	2	NA	1.15	NA	1.15	NA	NA
Q9Y520	620	PRRC2C	PRRC2C_C620	PRC2C_HUMAN Protein PRRC2C OS=Homo sapiens OX=9606 GN=PRRC2C PE=1 SV=4	#CNKEEEPVFTR	#CNKEEEPVFTR	2	4	1.11	1.19	1.15	0.0565685	4.919
Q5UIP0	82	RIF1	RIF1_C82	RIF1_HUMAN Telomere-associated protein RIF1 OS=Homo sapiens OX=9606 GN=RIF1 PE=1 SV=2	NA	#CLYNPK	NA	1	NA	1.15	1.15	NA	NA
Q2TB90	627	HKDC1	HKDC1_C627	HKDC1_HUMAN Hexokinase HKDC1 OS=Homo sapiens OX=9606 GN=HKDC1 PE=1 SV=3	NA	#CEGEDVVDMLR	NA	2	NA	1.15	1.15	NA	NA
Q14204	4556	DYNC1H1	DYNC1H1_C4556	DYHC1_HUMAN Cytoplasmic dynein 1 heavy chain 1 OS=Homo sapiens OX=9606 GN=DYNC1H1 PE=1 SV=5	NA	#CSFGVTGLK	NA	1	NA	1.15	1.15	NA	NA
P00558	367	PGK1	PGK1_C367	PGK1_HUMAN Phosphoglycerate kinase 1 OS=Homo sapiens OX=9606 GN=PGK1 PE=1 SV=3	NA	#CITIIGGGDTATCCAK	NA	1	NA	1.15	1.15	NA	NA
Q6Y7W6	573	GIGYF2	GIGYF2_C573	GGYF2_HUMAN GRB10-interacting GYF protein 2 OS=Homo sapiens OX=9606 GN=GIGYF2 PE=1 SV=1	NA	#CDESFQPLGDIMK	NA	1	NA	1.15	1.15	NA	NA
P49790	404	NUP153	NUP153_C404	NU153_HUMAN Nuclear pore complex protein Nup153 OS=Homo sapiens OX=9606 GN=NUP153 PE=1 SV=2	NA	#CSTGYEK	NA	2	NA	1.15	1.15	NA	NA
P37173	461	TGFBR2	TGFBR2_C461	TGFR2_HUMAN TGF-beta receptor type-2 OS=Homo sapiens OX=9606 GN=TGFBR2 PE=1 SV=2	NA	#CNAVGEVK	NA	1	NA	1.15	1.15	NA	NA
Q5VZE5	409	NAA35	NAA35_C409	NAA35_HUMAN N-alpha-acetyltransferase 35, NatC auxiliary subunit OS=Homo sapiens OX=9606 GN=NAA35 PE=1 SV=1	#CYLYNNHQAK	#CYLYNNHQAK	3	1	1.16	1.13	1.145	0.0212132	1.85268
Q9UI10	69	EIF2B4	EIF2B4_C69	EI2BD_HUMAN Translation initiation factor eIF-2B subunit delta OS=Homo sapiens OX=9606 GN=EIF2B4 PE=1 SV=2	#CQVGPTR	#CQVGPTR	1	1	1.16	1.13	1.145	0.0212132	1.85268
Q9UBM7	380	DHCR7	DHCR7_C380	DHCR7_HUMAN 7-dehydrocholesterol reductase OS=Homo sapiens OX=9606 GN=DHCR7 PE=1 SV=1	#CSYTSADGQR	#CSYTSADGQR	2	2	1.06	1.23	1.145	0.120208	10.4985
Q9NZB2	919	FAM120A	FAM120A_C919	F120A_HUMAN Constitutive coactivator of PPAR-gamma-like protein 1 OS=Homo sapiens OX=9606 GN=FAM120A PE=1 SV=2	#CGAFSGSDSSR	#CGAFSGSDSSR	1	2	1.02	1.27	1.145	0.176777	15.439
O75369	2333	FLNB	FLNB_C2333	FLNB_HUMAN Filamin-B OS=Homo sapiens OX=9606 GN=FLNB PE=1 SV=2	#CHVSELEPDKYAVR	#CHVSELEPDKYAVR #CHVSELEPDK	1	3	0.88	1.41	1.145	0.374767	32.7307
Q63HN8	3008	RNF213	RNF213_C3008	RN213_HUMAN E3 ubiquitin-protein ligase RNF213 OS=Homo sapiens OX=9606 GN=RNF213 PE=1 SV=3	#CSEEVSPMQLIK	#CSEEVSPMQLIK	4	6	1.04	1.245	1.1425	0.144957	12.6877
Q86XA9	1533	HEATR5A	HEATR5A_C1533	HTR5A_HUMAN HEAT repeat-containing protein 5A OS=Homo sapiens OX=9606 GN=HEATR5A PE=1 SV=2	#CQGSSSGATIK	#CQGSSSGATIK	1	2	1.21	1.07	1.14	0.0989949	8.68377
P00492	23	HPRT1	HPRT1_C23	HPRT_HUMAN Hypoxanthine-guanine phosphoribosyltransferase OS=Homo sapiens OX=9606 GN=HPRT1 PE=1 SV=2	#CIPNHYAEDLER	#CIPNHYAEDLER	4	7	1.17	1.11	1.14	0.0424264	3.72161
Q9HC21	222	SLC25A19	SLC25A19_C222	TPC_HUMAN Mitochondrial thiamine pyrophosphate carrier OS=Homo sapiens OX=9606 GN=SLC25A19 PE=1 SV=1	#CGSGAGVISK	#CGSGAGVISK	1	1	1.02	1.26	1.14	0.169706	14.8865
Q92797	859	SYMPK	SYMPK_C859	SYMPK_HUMAN Symplekin OS=Homo sapiens OX=9606 GN=SYMPK PE=1 SV=2	#CLHSLTDK	NA	1	NA	1.14	NA	1.14	NA	NA
Q15477	579	SKIV2L	SKIV2L_C579	SKIV2_HUMAN Helicase SKI2W OS=Homo sapiens OX=9606 GN=SKIV2L PE=1 SV=3	#CDEQASGLTSLDLTTSSEK	NA	1	NA	1.14	NA	1.14	NA	NA
P08581	624	MET	MET_C624	MET_HUMAN Hepatocyte growth factor receptor OS=Homo sapiens OX=9606 GN=MET PE=1 SV=4	#CTVGPAMNK	NA	1	NA	1.14	NA	1.14	NA	NA
P46013	226	MKI67	MKI67_C226	KI67_HUMAN Proliferation marker protein Ki-67 OS=Homo sapiens OX=9606 GN=MKI67 PE=1 SV=2	#CLDNSK	NA	1	NA	1.14	NA	1.14	NA	NA
P25054	1727	APC	APC_C1727	APC_HUMAN Adenomatous polyposis coli protein OS=Homo sapiens OX=9606 GN=APC PE=1 SV=2	#CINSAMPK	NA	2	NA	1.14	NA	1.14	NA	NA
P52701	783	MSH6	MSH6_C783	MSH6_HUMAN DNA mismatch repair protein Msh6 OS=Homo sapiens OX=9606 GN=MSH6 PE=1 SV=2	#CNHYAINDR	NA	1	NA	1.14	NA	1.14	NA	NA
P15924	1805	DSP	DSP_C1805	DESP_HUMAN Desmoplakin OS=Homo sapiens OX=9606 GN=DSP PE=1 SV=3	#CTQVVQER	NA	1	NA	1.14	NA	1.14	NA	NA
Q9GIP4	102	SLC7A5P2	SLC7A5P2_C102	LAT1L_HUMAN Putative L-type amino acid transporter 1-like protein IMAA OS=Homo sapiens OX=9606 GN=SLC7A5P2 PE=5 SV=2	NA	#CYAELGTTISK	NA	1	NA	1.14	1.14	NA	NA
Q9UIA9	1038	XPO7	XPO7_C1038	XPO7_HUMAN Exportin-7 OS=Homo sapiens OX=9606 GN=XPO7 PE=1 SV=3	NA	#CFENLMEGIER	NA	4	NA	1.14	1.14	NA	NA
P78345	80	RPP38	RPP38_C80	RPP38_HUMAN Ribonuclease P protein subunit p38 OS=Homo sapiens OX=9606 GN=RPP38 PE=1 SV=2	NA	#CSIAVDISENLK	NA	1	NA	1.14	1.14	NA	NA
A6PVS8	312	LRRIQ3	LRRIQ3_C312	LRIQ3_HUMAN Leucine-rich repeat and IQ domain-containing protein 3 OS=Homo sapiens OX=9606 GN=LRRIQ3 PE=1 SV=1	NA	#CELKPK	NA	1	NA	1.14	1.14	NA	NA
Q14204	2142	DYNC1H1	DYNC1H1_C2142	DYHC1_HUMAN Cytoplasmic dynein 1 heavy chain 1 OS=Homo sapiens OX=9606 GN=DYNC1H1 PE=1 SV=5	NA	#CETMVPK	NA	1	NA	1.14	1.14	NA	NA
Q13155	205	AIMP2	AIMP2_C205	AIMP2_HUMAN Aminoacyl tRNA synthase complex-interacting multifunctional protein 2 OS=Homo sapiens OX=9606 GN=AIMP2 PE=1 SV=2	#CPIEGEGNIAR	#CPIEGEGNIAR	2	2	1.09	1.18	1.135	0.0636396	5.60701
P34932	290	HSPA4	HSPA4_C290	HSP74_HUMAN Heat shock 70 kDa protein 4 OS=Homo sapiens OX=9606 GN=HSPA4 PE=1 SV=4	#CFMNDVDVSGTMNR	#CFMNDVDVSGTMNR	9	8	0.94	1.325	1.1325	0.272236	24.0385
P62495	302	ETF1	ETF1_C302	ERF1_HUMAN Eukaryotic peptide chain release factor subunit 1 OS=Homo sapiens OX=9606 GN=ETF1 PE=1 SV=3	#CFGVEDTLK	#CFGVEDTLK	1	1	1.26	1	1.13	0.183848	16.2697
Q9NVP1	183	DDX18	DDX18_C183	DDX18_HUMAN ATP-dependent RNA helicase DDX18 OS=Homo sapiens OX=9606 GN=DDX18 PE=1 SV=2	#CNLVNENTLK	#CNLVNENTLK	2	2	1.14	1.12	1.13	0.0141421	1.25152
Q92922	761	SMARCC1	SMARCC1_C761	SMRC1_HUMAN SWI/SNF complex subunit SMARCC1 OS=Homo sapiens OX=9606 GN=SMARCC1 PE=1 SV=3	#CIAGTGPDEPEKLEGAEEEKMEADPDGQQPEK	NA	1	NA	1.13	NA	1.13	NA	NA
Q1L5Z9	258	LONRF2	LONRF2_C258	LONF2_HUMAN LON peptidase N-terminal domain and RING finger protein 2 OS=Homo sapiens OX=9606 GN=LONRF2 PE=2 SV=3	#CQNEPLLIK	NA	1	NA	1.13	NA	1.13	NA	NA
Q8NCN4	337	RNF169	RNF169_C337	RN169_HUMAN E3 ubiquitin-protein ligase RNF169 OS=Homo sapiens OX=9606 GN=RNF169 PE=1 SV=2	#CVSAPDLTIEK	NA	1	NA	1.13	NA	1.13	NA	NA
P56559	161	ARL4C	ARL4C_C161	ARL4C_HUMAN ADP-ribosylation factor-like protein 4C OS=Homo sapiens OX=9606 GN=ARL4C PE=1 SV=1	#CAIIGEGLTEGMDK	NA	5	NA	1.13	NA	1.13	NA	NA
Q9H9B4	190	SFXN1	SFXN1_C190	SFXN1_HUMAN Sideroflexin-1 OS=Homo sapiens OX=9606 GN=SFXN1 PE=1 SV=4	#CINIPLMR	NA	1	NA	1.13	NA	1.13	NA	NA
Q9BUR4	14	WRAP53	WRAP53_C14	TCAB1_HUMAN Telomerase Cajal body protein 1 OS=Homo sapiens OX=9606 GN=WRAP53 PE=1 SV=1	#CPSDQDPAPAHPSPHASPM	NA	1	NA	1.13	NA	1.13	NA	NA
P55263	143	ADK	ADK_C143	ADK_HUMAN Adenosine kinase OS=Homo sapiens OX=9606 GN=ADK PE=1 SV=2	#CITGDNR	NA	1	NA	1.13	NA	1.13	NA	NA
Q9NRF9	51	POLE3	POLE3_C51	DPOE3_HUMAN DNA polymerase epsilon subunit 3 OS=Homo sapiens OX=9606 GN=POLE3 PE=1 SV=1	#CANNFAMK	NA	1	NA	1.13	NA	1.13	NA	NA
O75420	514	GIGYF1	GIGYF1_C514	GGYF1_HUMAN GRB10-interacting GYF protein 1 OS=Homo sapiens OX=9606 GN=GIGYF1 PE=1 SV=2	#CDEGFQPLGEVIK	#CDEGFQPLGEVIK	1	2	1.11	1.15	1.13	0.0282843	2.50303
Q9Y277	65	VDAC3	VDAC3_C65	VDAC3_HUMAN Voltage-dependent anion-selective channel protein 3 OS=Homo sapiens OX=9606 GN=VDAC3 PE=1 SV=1	#CNYGLTFTQK	#CNYGLTFTQK	1	2	1.02	1.24	1.13	0.155563	13.7667
P24534	191	EEF1B2	EEF1B2_C191	EF1B_HUMAN Elongation factor 1-beta OS=Homo sapiens OX=9606 GN=EEF1B2 PE=1 SV=3	NA	#CVVEDDKVGTDMLEEQITAF	NA	1	NA	1.13	1.13	NA	NA
P78527	1312	PRKDC	PRKDC_C1312	PRKDC_HUMAN DNA-dependent protein kinase catalytic subunit OS=Homo sapiens OX=9606 GN=PRKDC PE=1 SV=3	#CFGTGAAGNR	#CFGTGAAGNR	2	2	1.135	1.12	1.1275	0.0106066	0.940719
P13639	136	EEF2	EEF2_C136	EF2_HUMAN Elongation factor 2 OS=Homo sapiens OX=9606 GN=EEF2 PE=1 SV=4	#CVQTETVLR	#CVQTETVLR	3	4	1.13	1.125	1.1275	0.00353553	0.313573
P52701	88	MSH6	MSH6_C88	MSH6_HUMAN DNA mismatch repair protein Msh6 OS=Homo sapiens OX=9606 GN=MSH6 PE=1 SV=2	#CDFSPGDLVWAK	#CDFSPGDLVWAK	1	1	1.36	0.89	1.125	0.33234	29.5413
Q9NRL3	337	STRN4	STRN4_C337	STRN4_HUMAN Striatin-4 OS=Homo sapiens OX=9606 GN=STRN4 PE=1 SV=2	#CTVDGSPHELESR	#CTVDGSPHELESR	3	1	1.2	1.05	1.125	0.106066	9.42809
Q9Y6G9	51	DYNC1LI1	DYNC1LI1_C51	DC1L1_HUMAN Cytoplasmic dynein 1 light intermediate chain 1 OS=Homo sapiens OX=9606 GN=DYNC1LI1 PE=1 SV=3	#CILSEVSTR	#CILSEVSTR	1	1	1.15	1.1	1.125	0.0353553	3.1427
Q7Z6K5	183	ARPIN	ARPIN_C183	ARPIN_HUMAN Arpin OS=Homo sapiens OX=9606 GN=ARPIN PE=1 SV=1	#CNFTGDGK	NA	4	NA	1.125	NA	1.125	NA	NA
Q9NVC3	30	SLC38A7	SLC38A7_C30	S38A7_HUMAN Putative sodium-coupled neutral amino acid transporter 7 OS=Homo sapiens OX=9606 GN=SLC38A7 PE=1 SV=1	#CVDTAPK	#CVDTAPK	3	1	1.08	1.17	1.125	0.0636396	5.65685
P04083	324	ANXA1	ANXA1_C324	ANXA1_HUMAN Annexin A1 OS=Homo sapiens OX=9606 GN=ANXA1 PE=1 SV=2	#CQAILDETK #CQAILDETKGDYEK	#CQAILDETK #CQAILDETKGDYEK	4	4	1.105	1.14	1.1225	0.0247487	2.20479
Q63HN8	3261	RNF213	RNF213_C3261	RN213_HUMAN E3 ubiquitin-protein ligase RNF213 OS=Homo sapiens OX=9606 GN=RNF213 PE=1 SV=3	#CATPDAVVR	#CATPDAVVR	1	2	1.16	1.08	1.12	0.0565685	5.05076
O00410	944	IPO5	IPO5_C944	IPO5_HUMAN Importin-5 OS=Homo sapiens OX=9606 GN=IPO5 PE=1 SV=4	#CTEALPLLVR	#CTEALPLLVR	5	5	1.13	1.11	1.12	0.0141421	1.26269
Q08J23	221	NSUN2	NSUN2_C221	NSUN2_HUMAN tRNA (cytosine(34)-C(5))-methyltransferase OS=Homo sapiens OX=9606 GN=NSUN2 PE=1 SV=2	#CYLLVHQAK #CYLLVH	NA	3	NA	1.12	NA	1.12	NA	NA
P27797	163	CALR	CALR_C163	CALR_HUMAN Calreticulin OS=Homo sapiens OX=9606 GN=CALR PE=1 SV=1	#CKDDEFTHLY	NA	2	NA	1.12	NA	1.12	NA	NA
P54136	32	RARS	RARS_C32	SYRC_HUMAN Arginine--tRNA ligase, cytoplasmic OS=Homo sapiens OX=9606 GN=RARS PE=1 SV=2	#CGCLGASPNLEQLQEENLK	NA	2	NA	1.12	NA	1.12	NA	NA
Q13627	551	DYRK1A	DYRK1A_C551	DYR1A_HUMAN Dual specificity tyrosine-phosphorylation-regulated kinase 1A OS=Homo sapiens OX=9606 GN=DYRK1A PE=1 SV=2	#CETHSPQVR	NA	1	NA	1.12	NA	1.12	NA	NA
Q9C0D5	1611	TANC1	TANC1_C1611	TANC1_HUMAN Protein TANC1 OS=Homo sapiens OX=9606 GN=TANC1 PE=1 SV=3	#CGENGPAHPLPSK	NA	1	NA	1.12	NA	1.12	NA	NA
P46940	781	IQGAP1	IQGAP1_C781	IQGA1_HUMAN Ras GTPase-activating-like protein IQGAP1 OS=Homo sapiens OX=9606 GN=IQGAP1 PE=1 SV=1	NA	#CIQSQWR	NA	2	NA	1.12	1.12	NA	NA
O94822	1347	LTN1	LTN1_C1347	LTN1_HUMAN E3 ubiquitin-protein ligase listerin OS=Homo sapiens OX=9606 GN=LTN1 PE=1 SV=6	NA	#CETLTYISK	NA	1	NA	1.12	1.12	NA	NA
Q14669	710	TRIP12	TRIP12_C710	TRIPC_HUMAN E3 ubiquitin-protein ligase TRIP12 OS=Homo sapiens OX=9606 GN=TRIP12 PE=1 SV=1	NA	#CQEQIDLVPR	NA	1	NA	1.12	1.12	NA	NA
Q92567	75	FAM168A	FAM168A_C75	F168A_HUMAN Protein FAM168A OS=Homo sapiens OX=9606 GN=FAM168A PE=1 SV=2	NA	#CGTEGTFHLPVDTGTENR	NA	1	NA	1.12	1.12	NA	NA
Q15738	40	NSDHL	NSDHL_C40	NSDHL_HUMAN Sterol-4-alpha-carboxylate 3-dehydrogenase, decarboxylating OS=Homo sapiens OX=9606 GN=NSDHL PE=1 SV=2	NA	#CTVIGGSGFLGQH	NA	1	NA	1.12	1.12	NA	NA
P51970	36	NDUFA8	NDUFA8_C36	NDUA8_HUMAN NADH dehydrogenase [ubiquinone] 1 alpha subcomplex subunit 8 OS=Homo sapiens OX=9606 GN=NDUFA8 PE=1 SV=3	NA	#CDKPNK	NA	2	NA	1.12	1.12	NA	NA
Q8TCG1	337	CIP2A	CIP2A_C337	CIP2A_HUMAN Protein CIP2A OS=Homo sapiens OX=9606 GN=CIP2A PE=1 SV=2	NA	#CLEPTVALLR	NA	1	NA	1.12	1.12	NA	NA
Q9NZL4	22	HSPBP1	HSPBP1_C22	HPBP1_HUMAN Hsp70-binding protein 1 OS=Homo sapiens OX=9606 GN=HSPBP1 PE=1 SV=2	NA	#CSSGGGGGGSSAGGSGNSRPPR	NA	1	NA	1.12	1.12	NA	NA
Q969W9	218	PMEPA1	PMEPA1_C218	PMEPA_HUMAN Protein TMEPAI OS=Homo sapiens OX=9606 GN=PMEPA1 PE=1 SV=1	NA	#CYGSGGR	NA	2	NA	1.12	1.12	NA	NA
P35611	525	ADD1	ADD1_C525	ADDA_HUMAN Alpha-adducin OS=Homo sapiens OX=9606 GN=ADD1 PE=1 SV=2	NA	#CGVVMDR	NA	1	NA	1.12	1.12	NA	NA
Q7Z7H8	64	MRPL10	MRPL10_C64	RM10_HUMAN 39S ribosomal protein L10, mitochondrial OS=Homo sapiens OX=9606 GN=MRPL10 PE=1 SV=3	#CLPSPPSPPQEEIGLIR	#CLPSPPSPPQEEIGLIR	1	2	1.34	0.895	1.1175	0.314663	28.1577
P78527	974	PRKDC	PRKDC_C974	PRKDC_HUMAN DNA-dependent protein kinase catalytic subunit OS=Homo sapiens OX=9606 GN=PRKDC PE=1 SV=3	#CDVDQVTR	#CDVDQVTR	1	1	1.12	1.11	1.115	0.00707107	0.634176
Q9BQ75	55	CMSS1	CMSS1_C55	CMS1_HUMAN Protein CMSS1 OS=Homo sapiens OX=9606 GN=CMSS1 PE=1 SV=2	#CFLIQPK	#CFLIQPK	2	3	1.12	1.11	1.115	0.00707107	0.634176
Q9NZB2	1088	FAM120A	FAM120A_C1088	F120A_HUMAN Constitutive coactivator of PPAR-gamma-like protein 1 OS=Homo sapiens OX=9606 GN=FAM120A PE=1 SV=2	#CNTNPHLN	#CNTNPHLNAL	1	2	1.61	0.62	1.115	0.700036	62.7835
Q13616	551	CUL1	CUL1_C551	CUL1_HUMAN Cullin-1 OS=Homo sapiens OX=9606 GN=CUL1 PE=1 SV=2	#CTFALPSELER	#CTFALPSELER	1	2	1.33	0.9	1.115	0.304056	27.2696
Q93099	418	HGD	HGD_C418	HGD_HUMAN Homogentisate 1,2-dioxygenase OS=Homo sapiens OX=9606 GN=HGD PE=1 SV=2	#CLDENYHK	#CLDENYHK	1	3	1.18	1.05	1.115	0.0919239	8.24429
Q7Z3K3	547	POGZ	POGZ_C547	POGZ_HUMAN Pogo transposable element with ZNF domain OS=Homo sapiens OX=9606 GN=POGZ PE=1 SV=2	#CHLENVHSPYEST	NA	2	NA	1.115	NA	1.115	NA	NA
P48059	181	LIMS1	LIMS1_C181	LIMS1_HUMAN LIM and senescent cell antigen-like-containing domain protein 1 OS=Homo sapiens OX=9606 GN=LIMS1 PE=1 SV=4	#CLPCHDK	NA	2	NA	1.115	NA	1.115	NA	NA
Q06124	318	PTPN11	PTPN11_C318	PTN11_HUMAN Tyrosine-protein phosphatase non-receptor type 11 OS=Homo sapiens OX=9606 GN=PTPN11 PE=1 SV=2	NA	#CNNSKPK	NA	2	NA	1.115	1.115	NA	NA
P07355	262	ANXA2	ANXA2_C262	ANXA2_HUMAN Annexin A2 OS=Homo sapiens OX=9606 GN=ANXA2 PE=1 SV=2	#CIQNKPLYFADR #CIQNKPLYFAD	#CIQNKPLYFADR #CIQNKPLYFAD	2	3	1.385	0.84	1.1125	0.385373	34.6403
Q9NZM1	1574	MYOF	MYOF_C1574	MYOF_HUMAN Myoferlin OS=Homo sapiens OX=9606 GN=MYOF PE=1 SV=1	#CDPYIK	NA	1	NA	1.11	NA	1.11	NA	NA
P62917	114	RPL8	RPL8_C114	RL8_HUMAN 60S ribosomal protein L8 OS=Homo sapiens OX=9606 GN=RPL8 PE=1 SV=2	#CCLEEKPGDR	NA	1	NA	1.11	NA	1.11	NA	NA
P48163	556	ME1	ME1_C556	MAOX_HUMAN NADP-dependent malic enzyme OS=Homo sapiens OX=9606 GN=ME1 PE=1 SV=1	#CYSWPEEVQK	#CYSWPEEVQK	3	3	0.9	1.32	1.11	0.296985	26.7554
Q9NTM9	248	CUTC	CUTC_C248	CUTC_HUMAN Copper homeostasis protein cutC homolog OS=Homo sapiens OX=9606 GN=CUTC PE=1 SV=1	NA	#CSEYSLK	NA	2	NA	1.11	1.11	NA	NA
Q14764	282	MVP	MVP_C282	MVP_HUMAN Major vault protein OS=Homo sapiens OX=9606 GN=MVP PE=1 SV=4	NA	#CVILDPVGPDGK	NA	1	NA	1.11	1.11	NA	NA
Q13618	636	CUL3	CUL3_C636	CUL3_HUMAN Cullin-3 OS=Homo sapiens OX=9606 GN=CUL3 PE=1 SV=2	NA	#CGKPTQR	NA	2	NA	1.11	1.11	NA	NA
Q01831	60	XPC	XPC_C60	XPC_HUMAN DNA repair protein complementing XP-C cells OS=Homo sapiens OX=9606 GN=XPC PE=1 SV=4	NA	#CSHPGGSADGPAK	NA	2	NA	1.11	1.11	NA	NA
P00352	464	ALDH1A1	ALDH1A1_C464	AL1A1_HUMAN Retinal dehydrogenase 1 OS=Homo sapiens OX=9606 GN=ALDH1A1 PE=1 SV=2	#CPFGGFK	#CPFGGFK	3	2	1.17	1.05	1.11	0.0848528	7.6444
P40926	93	MDH2	MDH2_C93	MDHM_HUMAN Malate dehydrogenase, mitochondrial OS=Homo sapiens OX=9606 GN=MDH2 PE=1 SV=3	#CDVVVIPAGVPR	#CDVVVIPAGVPR	2	1	1.17	1.05	1.11	0.0848528	7.6444
P78527	3187	PRKDC	PRKDC_C3187	PRKDC_HUMAN DNA-dependent protein kinase catalytic subunit OS=Homo sapiens OX=9606 GN=PRKDC PE=1 SV=3	#CFFLSK	#CFFLSK	1	1	1.14	1.08	1.11	0.0424264	3.8222
P53396	20	ACLY	ACLY_C20	ACLY_HUMAN ATP-citrate synthase OS=Homo sapiens OX=9606 GN=ACLY PE=1 SV=3	#CTTSAIQNR	#CTTSAIQNR	2	2	1.14	1.08	1.11	0.0424264	3.8222
Q9H1K1	138	ISCU	ISCU_C138	ISCU_HUMAN Iron-sulfur cluster assembly enzyme ISCU, mitochondrial OS=Homo sapiens OX=9606 GN=ISCU PE=1 SV=2	#CSMLAEDAIK	#CSMLAEDAIK	4	3	1.22	0.99	1.105	0.162635	14.7181
Q13162	51	PRDX4	PRDX4_C51	PRDX4_HUMAN Peroxiredoxin-4 OS=Homo sapiens OX=9606 GN=PRDX4 PE=1 SV=1	#CHFYAGGQ	#CHFYAGGQ	2	2	1.18	1.03	1.105	0.106066	9.59873
Q96EY5	33	MVB12A	MVB12A_C33	MB12A_HUMAN Multivesicular body subunit 12A OS=Homo sapiens OX=9606 GN=MVB12A PE=1 SV=1	#CTVEGAPASFGK	#CTVEGAPASFGK	1	1	1.08	1.13	1.105	0.0353553	3.19958
Q9H6S3	9	EPS8L2	EPS8L2_C9	ES8L2_HUMAN Epidermal growth factor receptor kinase substrate 8-like protein 2 OS=Homo sapiens OX=9606 GN=EPS8L2 PE=1 SV=2	#CCPGATNGSLGR	#CCPGATNGSLGR	2	2	0.99	1.22	1.105	0.162635	14.7181
P21333	1165	FLNA	FLNA_C1165	FLNA_HUMAN Filamin-A OS=Homo sapiens OX=9606 GN=FLNA PE=1 SV=4	#CSGPGLER	#CSGPGLER	3	2	1.09	1.115	1.1025	0.0176777	1.60342
Q9Y6K5	350	OAS3	OAS3_C350	OAS3_HUMAN 2'-5'-oligoadenylate synthase 3 OS=Homo sapiens OX=9606 GN=OAS3 PE=1 SV=3	#CSGLGHPIQLDPNQK	#CSGLGHPIQLDPNQK	2	2	0.98	1.225	1.1025	0.173241	15.7135
Q86XL3	286	ANKLE2	ANKLE2_C286	ANKL2_HUMAN Ankyrin repeat and LEM domain-containing protein 2 OS=Homo sapiens OX=9606 GN=ANKLE2 PE=1 SV=4	#CLSESETVNK	#CLSESETVNK	2	1	1.4	0.8	1.1	0.424264	38.5695
P78417	90	GSTO1	GSTO1_C90	GSTO1_HUMAN Glutathione S-transferase omega-1 OS=Homo sapiens OX=9606 GN=GSTO1 PE=1 SV=2	#CEYLDEAYPGK	#CEYLDEAYPGK	2	2	1.15	1.05	1.1	0.0707107	6.42824
Q13263	169	TRIM28	TRIM28_C169	TIF1B_HUMAN Transcription intermediary factor 1-beta OS=Homo sapiens OX=9606 GN=TRIM28 PE=1 SV=5	#CSEPLCETCVEAHQR	NA	1	NA	1.1	NA	1.1	NA	NA
Q0JRZ9	86	FCHO2	FCHO2_C86	FCHO2_HUMAN F-BAR domain only protein 2 OS=Homo sapiens OX=9606 GN=FCHO2 PE=1 SV=2	#CHLDLVR	NA	1	NA	1.1	NA	1.1	NA	NA
P50213	127	IDH3A	IDH3A_C127	IDH3A_HUMAN Isocitrate dehydrogenase [NAD] subunit alpha, mitochondrial OS=Homo sapiens OX=9606 GN=IDH3A PE=1 SV=1	#CVSIEGYK	#CVSIEGYK	1	1	1.08	1.12	1.1	0.0282843	2.5713
Q5TGZ0	58	MICOS10	MICOS10_C58	MIC10_HUMAN MICOS complex subunit MIC10 OS=Homo sapiens OX=9606 GN=MICOS10 PE=1 SV=1	#CQHDFQAPYLLH	#CQHDFQAPYLLHGK	1	1	0.96	1.24	1.1	0.19799	17.9991
O43572	475	AKAP10	AKAP10_C475	AKA10_HUMAN A-kinase anchor protein 10, mitochondrial OS=Homo sapiens OX=9606 GN=AKAP10 PE=1 SV=2	NA	#CFTTPLR	NA	5	NA	1.1	1.1	NA	NA
Q9HAS0	288	C17orf75	C17orf75_C288	NJMU_HUMAN Protein Njmu-R1 OS=Homo sapiens OX=9606 GN=C17orf75 PE=1 SV=2	NA	#CNAGSNR	NA	2	NA	1.1	1.1	NA	NA
P57764	191	GSDMD	GSDMD_C191	GSDMD_HUMAN Gasdermin-D OS=Homo sapiens OX=9606 GN=GSDMD PE=1 SV=1	NA	#CLQGEGQGHLSQK	NA	1	NA	1.1	1.1	NA	NA
P52272	653	HNRNPM	HNRNPM_C653	HNRPM_HUMAN Heterogeneous nuclear ribonucleoprotein M OS=Homo sapiens OX=9606 GN=HNRNPM PE=1 SV=3	#CQIFVR	#CQIFVR	2	2	1.135	1.06	1.0975	0.053033	4.83216
P00558	99	PGK1	PGK1_C99	PGK1_HUMAN Phosphoglycerate kinase 1 OS=Homo sapiens OX=9606 GN=PGK1 PE=1 SV=3	#CVGPEVEKA	#CVGPEVEKA	1	1	1.21	0.98	1.095	0.162635	14.8525
Q14527	360	HLTF	HLTF_C360	HLTF_HUMAN Helicase-like transcription factor OS=Homo sapiens OX=9606 GN=HLTF PE=1 SV=2	#CSEQPSISDIK	NA	2	NA	1.095	NA	1.095	NA	NA
Q06830	83	PRDX1	PRDX1_C83	PRDX1_HUMAN Peroxiredoxin-1 OS=Homo sapiens OX=9606 GN=PRDX1 PE=1 SV=1	#CHLAWVNTPK	#CHLAWVNTPK	1	3	1.04	1.15	1.095	0.0777817	7.10336
O60313	801	OPA1	OPA1_C801	OPA1_HUMAN Dynamin-like 120 kDa protein, mitochondrial OS=Homo sapiens OX=9606 GN=OPA1 PE=1 SV=3	#CNEEHPAYLA #CNEEHPAYLASDEITTVR	#CNEEHPAYLA #CNEEHPAYLASDEITTVR	3	2	0.82	1.365	1.0925	0.385373	35.2744
Q96HC4	213	PDLIM5	PDLIM5_C213	PDLI5_HUMAN PDZ and LIM domain protein 5 OS=Homo sapiens OX=9606 GN=PDLIM5 PE=1 SV=5	#CSETSQELAEGQR	NA	1	NA	1.09	NA	1.09	NA	NA
Q15427	168	SF3B4	SF3B4_C168	SF3B4_HUMAN Splicing factor 3B subunit 4 OS=Homo sapiens OX=9606 GN=SF3B4 PE=1 SV=1	#CNRPITVS	NA	1	NA	1.09	NA	1.09	NA	NA
Q04446	473	GBE1	GBE1_C473	GLGB_HUMAN 1,4-alpha-glucan-branching enzyme OS=Homo sapiens OX=9606 GN=GBE1 PE=1 SV=3	#CIAYAESHDQALVGDK	NA	1	NA	1.09	NA	1.09	NA	NA
Q9H694	621	BICC1	BICC1_C621	BICC1_HUMAN Protein bicaudal C homolog 1 OS=Homo sapiens OX=9606 GN=BICC1 PE=1 SV=2	#CNDAFVEVGMPR	NA	1	NA	1.09	NA	1.09	NA	NA
Q8WXH0	5586	SYNE2	SYNE2_C5586	SYNE2_HUMAN Nesprin-2 OS=Homo sapiens OX=9606 GN=SYNE2 PE=1 SV=3	#CSELQGIGLNEK	NA	1	NA	1.09	NA	1.09	NA	NA
Q12907	239	LMAN2	LMAN2_C239	LMAN2_HUMAN Vesicular integral-membrane protein VIP36 OS=Homo sapiens OX=9606 GN=LMAN2 PE=1 SV=1	#CIDITGVR	NA	2	NA	1.09	NA	1.09	NA	NA
Q9BQ52	136	ELAC2	ELAC2_C136	RNZ2_HUMAN Zinc phosphodiesterase ELAC protein 2 OS=Homo sapiens OX=9606 GN=ELAC2 PE=1 SV=2	#CVLSGPPQLEK	NA	3	NA	1.09	NA	1.09	NA	NA
Q9UKK9	139	NUDT5	NUDT5_C139	NUDT5_HUMAN ADP-sugar pyrophosphatase OS=Homo sapiens OX=9606 GN=NUDT5 PE=1 SV=1	#CTIHIVTV	NA	1	NA	1.09	NA	1.09	NA	NA
Q7L1Q6	35	BZW1	BZW1_C35	BZW1_HUMAN Basic leucine zipper and W2 domain-containing protein 1 OS=Homo sapiens OX=9606 GN=BZW1 PE=1 SV=1	#CIIQGLTETGTDLEAVAK	NA	1	NA	1.09	NA	1.09	NA	NA
Q92499	139	DDX1	DDX1_C139	DDX1_HUMAN ATP-dependent RNA helicase DDX1 OS=Homo sapiens OX=9606 GN=DDX1 PE=1 SV=2	#CHDQGLCR	NA	1	NA	1.09	NA	1.09	NA	NA
Q8NFC6	2570	BOD1L1	BOD1L1_C2570	BD1L1_HUMAN Biorientation of chromosomes in cell division protein 1-like 1 OS=Homo sapiens OX=9606 GN=BOD1L1 PE=1 SV=2	#CITGQESK	NA	1	NA	1.09	NA	1.09	NA	NA
Q9BQ67	280	GRWD1	GRWD1_C280	GRWD1_HUMAN Glutamate-rich WD repeat-containing protein 1 OS=Homo sapiens OX=9606 GN=GRWD1 PE=1 SV=1	#CSADASIR	NA	2	NA	1.09	NA	1.09	NA	NA
Q9NU22	2158	MDN1	MDN1_C2158	MDN1_HUMAN Midasin OS=Homo sapiens OX=9606 GN=MDN1 PE=1 SV=2	#CLGEGGK	#CLGEGGK	1	1	0.66	1.52	1.09	0.608112	55.7901
Q04727	624	TLE4	TLE4_C624	TLE4_HUMAN Transducin-like enhancer protein 4 OS=Homo sapiens OX=9606 GN=TLE4 PE=1 SV=3	NA	#CIDISNDGTK	NA	1	NA	1.09	1.09	NA	NA
Q13347	57	EIF3I	EIF3I_C57	EIF3I_HUMAN Eukaryotic translation initiation factor 3 subunit I OS=Homo sapiens OX=9606 GN=EIF3I PE=1 SV=1	NA	#CVDADWDTK	NA	1	NA	1.09	1.09	NA	NA
Q8IU81	207	IRF2BP1	IRF2BP1_C207	I2BP1_HUMAN Interferon regulatory factor 2-binding protein 1 OS=Homo sapiens OX=9606 GN=IRF2BP1 PE=1 SV=1	NA	#CLAELNEAMR	NA	1	NA	1.09	1.09	NA	NA
Q9Y512	65	SAMM50	SAMM50_C65	SAM50_HUMAN Sorting and assembly machinery component 50 homolog OS=Homo sapiens OX=9606 GN=SAMM50 PE=1 SV=3	NA	#CEIGDVFK	NA	1	NA	1.09	1.09	NA	NA
Q9NRN7	296	AASDHPPT	AASDHPPT_C296	ADPPT_HUMAN L-aminoadipate-semialdehyde dehydrogenase-phosphopantetheinyl transferase OS=Homo sapiens OX=9606 GN=AASDHPPT PE=1 SV=2	NA	#CFTEEIPIR	NA	2	NA	1.09	1.09	NA	NA
Q17RY0	458	CPEB4	CPEB4_C458	CPEB4_HUMAN Cytoplasmic polyadenylation element-binding protein 4 OS=Homo sapiens OX=9606 GN=CPEB4 PE=1 SV=1	NA	#CFSHQNGER	NA	1	NA	1.09	1.09	NA	NA
P15428	63	HPGD	HPGD_C63	PGDH_HUMAN 15-hydroxyprostaglandin dehydrogenase [NAD(+)] OS=Homo sapiens OX=9606 GN=HPGD PE=1 SV=1	#CDVADQQQLR	#CDVADQQQLR	1	2	1.66	0.52	1.09	0.806102	73.9543
P05556	213	ITGB1	ITGB1_C213	ITB1_HUMAN Integrin beta-1 OS=Homo sapiens OX=9606 GN=ITGB1 PE=1 SV=2	#CTSPFSYK	#CTSPFSYK	1	1	1.16	1.02	1.09	0.0989949	9.08211
Q9UKV3	1083	ACIN1	ACIN1_C1083	ACINU_HUMAN Apoptotic chromatin condensation inducer in the nucleus OS=Homo sapiens OX=9606 GN=ACIN1 PE=1 SV=2	#CADYAEQDELDYHR	#CADYAEQDELDYHR	3	2	1.17	1	1.085	0.120208	11.0791
P30838	223	ALDH3A1	ALDH3A1_C223	AL3A1_HUMAN Aldehyde dehydrogenase, dimeric NADP-preferring OS=Homo sapiens OX=9606 GN=ALDH3A1 PE=1 SV=3	#CDLDVACR	#CDLDVACR	2	1	1.15	1.02	1.085	0.0919239	8.47225
P82912	112	MRPS11	MRPS11_C112	RT11_HUMAN 28S ribosomal protein S11, mitochondrial OS=Homo sapiens OX=9606 GN=MRPS11 PE=1 SV=2	#CGTEGFR	NA	2	NA	1.085	NA	1.085	NA	NA
Q8IV32	76	CCDC71	CCDC71_C76	CCD71_HUMAN Coiled-coil domain-containing protein 71 OS=Homo sapiens OX=9606 GN=CCDC71 PE=1 SV=3	#CTANPPSQTK	NA	2	NA	1.085	NA	1.085	NA	NA
Q13263	224	TRIM28	TRIM28_C224	TIF1B_HUMAN Transcription intermediary factor 1-beta OS=Homo sapiens OX=9606 GN=TRIM28 PE=1 SV=5	#CDTLTCR	#CDTLTCR	1	1	1.06	1.11	1.085	0.0353553	3.25856
P50990	244	CCT8	CCT8_C244	TCPQ_HUMAN T-complex protein 1 subunit theta OS=Homo sapiens OX=9606 GN=CCT8 PE=1 SV=4	#CPFDGMITETK	#CPFDGMITETK	6	2	1.03	1.14	1.085	0.0777817	7.16882
Q03701	856	CEBPZ	CEBPZ_C856	CEBPZ_HUMAN CCAAT/enhancer-binding protein zeta OS=Homo sapiens OX=9606 GN=CEBPZ PE=1 SV=3	#CFSSGKDDMDFAGNVK	#CFSSGKDDMDFAGNVK #CFSSGK	1	3	0.88	1.29	1.085	0.289914	26.7202
Q5VZ89	763	DENND4C	DENND4C_C763	DEN4C_HUMAN DENN domain-containing protein 4C OS=Homo sapiens OX=9606 GN=DENND4C PE=1 SV=3	#CYTNPPQWAK	NA	2	NA	1.08	NA	1.08	NA	NA
P78527	1432	PRKDC	PRKDC_C1432	PRKDC_HUMAN DNA-dependent protein kinase catalytic subunit OS=Homo sapiens OX=9606 GN=PRKDC PE=1 SV=3	#CAVNLYGPDAQVDR	NA	1	NA	1.08	NA	1.08	NA	NA
O75116	247	ROCK2	ROCK2_C247	ROCK2_HUMAN Rho-associated protein kinase 2 OS=Homo sapiens OX=9606 GN=ROCK2 PE=1 SV=4	#CDTAVGTPDYISPEVLK	NA	2	NA	1.08	NA	1.08	NA	NA
Q9Y5L0	511	TNPO3	TNPO3_C511	TNPO3_HUMAN Transportin-3 OS=Homo sapiens OX=9606 GN=TNPO3 PE=1 SV=3	#CEKPLASAAAK	NA	1	NA	1.08	NA	1.08	NA	NA
Q7L273	282	KCTD9	KCTD9_C282	KCTD9_HUMAN BTB/POZ domain-containing protein KCTD9 OS=Homo sapiens OX=9606 GN=KCTD9 PE=1 SV=1	#CSNAEGASLK	NA	1	NA	1.08	NA	1.08	NA	NA
Q8TBC4	237	UBA3	UBA3_C237	UBA3_HUMAN NEDD8-activating enzyme E1 catalytic subunit OS=Homo sapiens OX=9606 GN=UBA3 PE=1 SV=2	#CTIASMPR	#CTIASMPR	1	1	1.06	1.1	1.08	0.0282843	2.61891
Q9H9J2	53	MRPL44	MRPL44_C53	RM44_HUMAN 39S ribosomal protein L44, mitochondrial OS=Homo sapiens OX=9606 GN=MRPL44 PE=1 SV=1	#CPPPPVR	#CPPPPVR	1	1	1.05	1.11	1.08	0.0424264	3.92837
P28827	894	PTPRM	PTPRM_C894	PTPRM_HUMAN Receptor-type tyrosine-protein phosphatase mu OS=Homo sapiens OX=9606 GN=PTPRM PE=1 SV=2	NA	#CAEGYGFK	NA	1	NA	1.08	1.08	NA	NA
P10155	71	RO60	RO60_C71	RO60_HUMAN 60 kDa SS-A/Ro ribonucleoprotein OS=Homo sapiens OX=9606 GN=RO60 PE=1 SV=2	NA	#CEVIQEIK	NA	2	NA	1.08	1.08	NA	NA
Q5JTH9	839	RRP12	RRP12_C839	RRP12_HUMAN RRP12-like protein OS=Homo sapiens OX=9606 GN=RRP12 PE=1 SV=2	NA	#CLLHIVR	NA	1	NA	1.08	1.08	NA	NA
Q9UHR5	172	SAP30BP	SAP30BP_C172	S30BP_HUMAN SAP30-binding protein OS=Homo sapiens OX=9606 GN=SAP30BP PE=1 SV=1	NA	#CAIDELGTNYPK	NA	3	NA	1.08	1.08	NA	NA
P78527	2880	PRKDC	PRKDC_C2880	PRKDC_HUMAN DNA-dependent protein kinase catalytic subunit OS=Homo sapiens OX=9606 GN=PRKDC PE=1 SV=3	NA	#CLASLQQPVGIR	NA	2	NA	1.08	1.08	NA	NA
Q9NQ88	114	TIGAR	TIGAR_C114	TIGAR_HUMAN Fructose-2,6-bisphosphatase TIGAR OS=Homo sapiens OX=9606 GN=TIGAR PE=1 SV=1	NA	#CPVFTPPGGETLDQVK	NA	1	NA	1.08	1.08	NA	NA
Q8N6M3	7	FITM2	FITM2_C7	FITM2_HUMAN Fat storage-inducing transmembrane protein 2 OS=Homo sapiens OX=9606 GN=FITM2 PE=1 SV=1	NA	#CEWLLR	NA	1	NA	1.08	1.08	NA	NA
Q9BU89	232	DOHH	DOHH_C232	DOHH_HUMAN Deoxyhypusine hydroxylase OS=Homo sapiens OX=9606 GN=DOHH PE=1 SV=1	NA	#CTENPMVR	NA	1	NA	1.08	1.08	NA	NA
Q92900	628	UPF1	UPF1_C628	RENT1_HUMAN Regulator of nonsense transcripts 1 OS=Homo sapiens OX=9606 GN=UPF1 PE=1 SV=2	NA	#CVGAGDPR	NA	1	NA	1.08	1.08	NA	NA
P45880	13	VDAC2	VDAC2_C13	VDAC2_HUMAN Voltage-dependent anion-selective channel protein 2 OS=Homo sapiens OX=9606 GN=VDAC2 PE=1 SV=2	#CIPPSYADLGK	#CIPPSYADLGK	26	41	1.085	1.07	1.0775	0.0106066	0.984371
P83731	36	RPL24	RPL24_C36	RL24_HUMAN 60S ribosomal protein L24 OS=Homo sapiens OX=9606 GN=RPL24 PE=1 SV=1	#CESAFLSK #CESAFLS	#CESAFLSK #CESAFLS	4	5	1.075	1.08	1.0775	0.00353553	0.328124
Q16666	191	IFI16	IFI16_C191	IF16_HUMAN Gamma-interferon-inducible protein 16 OS=Homo sapiens OX=9606 GN=IFI16 PE=1 SV=3	#CQVTPR	#CQVTPR	1	1	1.12	1.03	1.075	0.0636396	5.91996
Q92963	12	RIT1	RIT1_C12	RIT1_HUMAN GTP-binding protein Rit1 OS=Homo sapiens OX=9606 GN=RIT1 PE=1 SV=1	#CSSPAGLSR	#CSSPAGLSR	2	2	1.03	1.12	1.075	0.0636396	5.91996
Q02952	1139	AKAP12	AKAP12_C1139	AKA12_HUMAN A-kinase anchor protein 12 OS=Homo sapiens OX=9606 GN=AKAP12 PE=1 SV=4	#CQAETLAGVK	#CQAETLAGVK	3	2	1.13	1.02	1.075	0.0777817	7.23551
O60437	1693	PPL	PPL_C1693	PEPL_HUMAN Periplakin OS=Homo sapiens OX=9606 GN=PPL PE=1 SV=4	#CDWEEISVK	#CDWEEISVK	2	2	0.845	1.3	1.0725	0.321734	29.9985
P30041	47	PRDX6	PRDX6_C47	PRDX6_HUMAN Peroxiredoxin-6 OS=Homo sapiens OX=9606 GN=PRDX6 PE=1 SV=3	#CTTELGR	NA	2	NA	1.07	NA	1.07	NA	NA
Q9UBQ5	87	EIF3K	EIF3K_C87	EIF3K_HUMAN Eukaryotic translation initiation factor 3 subunit K OS=Homo sapiens OX=9606 GN=EIF3K PE=1 SV=1	#CMIDQAHQEER #CMIDQAHQEERPIR	NA	6	NA	1.07	NA	1.07	NA	NA
P17676	248	CEBPB	CEBPB_C248	CEBPB_HUMAN CCAAT/enhancer-binding protein beta OS=Homo sapiens OX=9606 GN=CEBPB PE=1 SV=2	#CYAGAAPAPSQVK	NA	1	NA	1.07	NA	1.07	NA	NA
O75420	177	GIGYF1	GIGYF1_C177	GGYF1_HUMAN GRB10-interacting GYF protein 1 OS=Homo sapiens OX=9606 GN=GIGYF1 PE=1 SV=2	#CGFEEGGAGPR	NA	1	NA	1.07	NA	1.07	NA	NA
Q9BT22	396	ALG1	ALG1_C396	ALG1_HUMAN Chitobiosyldiphosphodolichol beta-mannosyltransferase OS=Homo sapiens OX=9606 GN=ALG1 PE=1 SV=2	#CLHELVK	NA	2	NA	1.07	NA	1.07	NA	NA
P14866	404	HNRNPL	HNRNPL_C404	HNRPL_HUMAN Heterogeneous nuclear ribonucleoprotein L OS=Homo sapiens OX=9606 GN=HNRNPL PE=1 SV=2	#CLYGNVEK	NA	1	NA	1.07	NA	1.07	NA	NA
Q7L266	97	ASRGL1	ASRGL1_C97	ASGL1_HUMAN Isoaspartyl peptidase/L-asparaginase OS=Homo sapiens OX=9606 GN=ASRGL1 PE=1 SV=2	#CIANPIK	NA	1	NA	1.07	NA	1.07	NA	NA
Q3KQU3	382	MAP7D1	MAP7D1_C382	MA7D1_HUMAN MAP7 domain-containing protein 1 OS=Homo sapiens OX=9606 GN=MAP7D1 PE=1 SV=1	#CAPAGER	NA	1	NA	1.07	NA	1.07	NA	NA
Q14202	620	ZMYM3	ZMYM3_C620	ZMYM3_HUMAN Zinc finger MYM-type protein 3 OS=Homo sapiens OX=9606 GN=ZMYM3 PE=1 SV=2	#CEDFKR	NA	1	NA	1.07	NA	1.07	NA	NA
Q7Z4V5	631	HDGFL2	HDGFL2_C631	HDGR2_HUMAN Hepatoma-derived growth factor-related protein 2 OS=Homo sapiens OX=9606 GN=HDGFL2 PE=1 SV=1	#CGSSEDLHDSVR	NA	1	NA	1.07	NA	1.07	NA	NA
P49419	70	ALDH7A1	ALDH7A1_C70	AL7A1_HUMAN Alpha-aminoadipic semialdehyde dehydrogenase OS=Homo sapiens OX=9606 GN=ALDH7A1 PE=1 SV=5	#CPANNEPIAR	NA	3	NA	1.07	NA	1.07	NA	NA
P35227	168	PCGF2	PCGF2_C168	PCGF2_HUMAN Polycomb group RING finger protein 2 OS=Homo sapiens OX=9606 GN=PCGF2 PE=1 SV=1	#CPAAMTVM	NA	1	NA	1.07	NA	1.07	NA	NA
P54646	174	PRKAA2	PRKAA2_C174	AAPK2_HUMAN 5'-AMP-activated protein kinase catalytic subunit alpha-2 OS=Homo sapiens OX=9606 GN=PRKAA2 PE=1 SV=2	#CGSPNYAAPEVISGR	#CGSPNYAAPEVISGR	1	4	1.04	1.1	1.07	0.0424264	3.96508
P46821	2361	MAP1B	MAP1B_C2361	MAP1B_HUMAN Microtubule-associated protein 1B OS=Homo sapiens OX=9606 GN=MAP1B PE=1 SV=2	#CYIPNHSNSK	#CYIPNHSNSK	1	1	1.02	1.12	1.07	0.0707107	6.60847
Q14789	1941	GOLGB1	GOLGB1_C1941	GOGB1_HUMAN Golgin subfamily B member 1 OS=Homo sapiens OX=9606 GN=GOLGB1 PE=1 SV=2	NA	#CQDVTDAQIK	NA	2	NA	1.07	1.07	NA	NA
Q9NVH1	241	DNAJC11	DNAJC11_C241	DJC11_HUMAN DnaJ homolog subfamily C member 11 OS=Homo sapiens OX=9606 GN=DNAJC11 PE=1 SV=2	NA	#CALQFSSR	NA	1	NA	1.07	1.07	NA	NA
A2RRP1	1453	NBAS	NBAS_C1453	NBAS_HUMAN Neuroblastoma-amplified sequence OS=Homo sapiens OX=9606 GN=NBAS PE=1 SV=2	NA	#CGGAYQIGTTANEDLEK	NA	1	NA	1.07	1.07	NA	NA
P36894	377	BMPR1A	BMPR1A_C377	BMR1A_HUMAN Bone morphogenetic protein receptor type-1A OS=Homo sapiens OX=9606 GN=BMPR1A PE=1 SV=2	NA	#CIADLGLAVK	NA	1	NA	1.07	1.07	NA	NA
P51116	151	FXR2	FXR2_C151	FXR2_HUMAN Fragile X mental retardation syndrome-related protein 2 OS=Homo sapiens OX=9606 GN=FXR2 PE=1 SV=2	NA	#CSNENVHK	NA	1	NA	1.07	1.07	NA	NA
O95104	54	SCAF4	SCAF4_C54	SCAF4_HUMAN SR-related and CTD-associated factor 4 OS=Homo sapiens OX=9606 GN=SCAF4 PE=1 SV=3	NA	#CKPEYK	NA	1	NA	1.07	1.07	NA	NA
P23528	39	CFL1	CFL1_C39	COF1_HUMAN Cofilin-1 OS=Homo sapiens OX=9606 GN=CFL1 PE=1 SV=3	NA	#CLSEDKK	NA	1	NA	1.07	1.07	NA	NA
O95602	613	POLR1A	POLR1A_C613	RPA1_HUMAN DNA-directed RNA polymerase I subunit RPA1 OS=Homo sapiens OX=9606 GN=POLR1A PE=1 SV=2	#CTDQQYLVPK	#CTDQQYLVPK	1	2	1.19	0.95	1.07	0.169706	15.8603
Q9Y3Q3	144	TMED3	TMED3_C144	TMED3_HUMAN Transmembrane emp24 domain-containing protein 3 OS=Homo sapiens OX=9606 GN=TMED3 PE=1 SV=1	#CVTIHEALK	#CVTIHEALK	1	1	0.76	1.38	1.07	0.438406	40.9725
P30519	265	HMOX2	HMOX2_C265	HMOX2_HUMAN Heme oxygenase 2 OS=Homo sapiens OX=9606 GN=HMOX2 PE=1 SV=2	#CPFYAAEQDK	#CPFYAAEQDK	2	2	1.07	1.06	1.065	0.00707107	0.66395
Q96BN8	17	OTULIN	OTULIN_C17	OTUL_HUMAN Ubiquitin thioesterase otulin OS=Homo sapiens OX=9606 GN=OTULIN PE=1 SV=3	#CAETPAR	#CAETPAR	2	1	1.07	1.06	1.065	0.00707107	0.66395
P55072	184	VCP	VCP_C184	TERA_HUMAN Transitional endoplasmic reticulum ATPase OS=Homo sapiens OX=9606 GN=VCP PE=1 SV=4	#CEGEPIKR	NA	2	NA	1.065	NA	1.065	NA	NA
P13693	28	TPT1	TPT1_C28	TCTP_HUMAN Translationally-controlled tumor protein OS=Homo sapiens OX=9606 GN=TPT1 PE=1 SV=1	#CLEVEGK	#CLEVEGK	1	2	1.03	1.1	1.065	0.0494975	4.64765
P14174	60	MIF	MIF_C60	MIF_HUMAN Macrophage migration inhibitory factor OS=Homo sapiens OX=9606 GN=MIF PE=1 SV=4	#CSLHSIGK	#CSLHSIGK	3	2	1.02	1.11	1.065	0.0636396	5.97555
Q9NZQ3	239	NCKIPSD	NCKIPSD_C239	SPN90_HUMAN NCK-interacting protein with SH3 domain OS=Homo sapiens OX=9606 GN=NCKIPSD PE=1 SV=1	#CSPTPPPVPR	#CSPTPPPVPR	1	1	0.88	1.25	1.065	0.26163	24.5662
Q9Y2X3	139	NOP58	NOP58_C139	NOP58_HUMAN Nucleolar protein 58 OS=Homo sapiens OX=9606 GN=NOP58 PE=1 SV=1	#CLGLAH	#CLGLAH	1	1	1.11	1.01	1.06	0.0707107	6.67082
Q9ULH0	1250	KIDINS220	KIDINS220_C1250	KDIS_HUMAN Kinase D-interacting substrate of 220 kDa OS=Homo sapiens OX=9606 GN=KIDINS220 PE=1 SV=3	#CNIDELKK	NA	1	NA	1.06	NA	1.06	NA	NA
Q15349	220	RPS6KA2	RPS6KA2_C220	KS6A2_HUMAN Ribosomal protein S6 kinase alpha-2 OS=Homo sapiens OX=9606 GN=RPS6KA2 PE=1 SV=2	#CGTIEYMAPEVVNR	NA	1	NA	1.06	NA	1.06	NA	NA
Q9Y6K0	11	CEPT1	CEPT1_C11	CEPT1_HUMAN Choline/ethanolaminephosphotransferase 1 OS=Homo sapiens OX=9606 GN=CEPT1 PE=1 SV=1	#CGDSHPESPVGF	NA	1	NA	1.06	NA	1.06	NA	NA
Q92973	467	TNPO1	TNPO1_C467	TNPO1_HUMAN Transportin-1 OS=Homo sapiens OX=9606 GN=TNPO1 PE=1 SV=2	#CWTLSR	NA	1	NA	1.06	NA	1.06	NA	NA
O94925	500	GLS	GLS_C500	GLSK_HUMAN Glutaminase kidney isoform, mitochondrial OS=Homo sapiens OX=9606 GN=GLS PE=1 SV=1	#CWSPPLDK	NA	1	NA	1.06	NA	1.06	NA	NA
P00558	108	PGK1	PGK1_C108	PGK1_HUMAN Phosphoglycerate kinase 1 OS=Homo sapiens OX=9606 GN=PGK1 PE=1 SV=3	#CANPAAGSVILLENLR	#CANPAAGSVILLENLR	1	5	1.05	1.07	1.06	0.0141421	1.33416
O75940	214	SMNDC1	SMNDC1_C214	SPF30_HUMAN Survival of motor neuron-related-splicing factor 30 OS=Homo sapiens OX=9606 GN=SMNDC1 PE=1 SV=1	#CGIADKPMTQY #CGIADKPMTQ	#CGIADKPMTQ	2	2	0.9	1.22	1.06	0.226274	21.3466
Q9H9A5	347	CNOT10	CNOT10_C347	CNO10_HUMAN CCR4-NOT transcription complex subunit 10 OS=Homo sapiens OX=9606 GN=CNOT10 PE=1 SV=1	NA	#CTLLTNK	NA	2	NA	1.06	1.06	NA	NA
Q8N6M3	121	FITM2	FITM2_C121	FITM2_HUMAN Fat storage-inducing transmembrane protein 2 OS=Homo sapiens OX=9606 GN=FITM2 PE=1 SV=1	NA	#CYQSPALEGVR	NA	2	NA	1.06	1.06	NA	NA
A5YKK6	1932	CNOT1	CNOT1_C1932	CNOT1_HUMAN CCR4-NOT transcription complex subunit 1 OS=Homo sapiens OX=9606 GN=CNOT1 PE=1 SV=2	NA	#CYHNLDAFVR	NA	1	NA	1.06	1.06	NA	NA
Q9BQG0	109	MYBBP1A	MYBBP1A_C109	MBB1A_HUMAN Myb-binding protein 1A OS=Homo sapiens OX=9606 GN=MYBBP1A PE=1 SV=2	NA	#CSILQQIQEK	NA	1	NA	1.06	1.06	NA	NA
Q9Y6D5	1450	ARFGEF2	ARFGEF2_C1450	BIG2_HUMAN Brefeldin A-inhibited guanine nucleotide-exchange protein 2 OS=Homo sapiens OX=9606 GN=ARFGEF2 PE=1 SV=3	NA	#CLENLVISNGEK	NA	2	NA	1.06	1.06	NA	NA
Q8IWA4	665	MFN1	MFN1_C665	MFN1_HUMAN Mitofusin-1 OS=Homo sapiens OX=9606 GN=MFN1 PE=1 SV=3	NA	#CSHQVK	NA	1	NA	1.06	1.06	NA	NA
Q9H3H5	42	DPAGT1	DPAGT1_C42	GPT_HUMAN UDP-N-acetylglucosamine--dolichyl-phosphate N-acetylglucosaminephosphotransferase OS=Homo sapiens OX=9606 GN=DPAGT1 PE=1 SV=2	NA	#CGQDLNK	NA	2	NA	1.06	1.06	NA	NA
Q8N8A6	420	DDX51	DDX51_C420	DDX51_HUMAN ATP-dependent RNA helicase DDX51 OS=Homo sapiens OX=9606 GN=DDX51 PE=1 SV=3	NA	#CPQMPLQK	NA	1	NA	1.06	1.06	NA	NA
Q15758	363	SLC1A5	SLC1A5_C363	AAAT_HUMAN Neutral amino acid transporter B(0) OS=Homo sapiens OX=9606 GN=SLC1A5 PE=1 SV=2	NA	#CVEENNGVAK	NA	2	NA	1.06	1.06	NA	NA
P31939	325	ATIC	ATIC_C325	PUR9_HUMAN Bifunctional purine biosynthesis protein PURH OS=Homo sapiens OX=9606 GN=ATIC PE=1 SV=3	NA	#CDVPTAK	NA	1	NA	1.06	1.06	NA	NA
P48200	178	IREB2	IREB2_C178	IREB2_HUMAN Iron-responsive element-binding protein 2 OS=Homo sapiens OX=9606 GN=IREB2 PE=1 SV=4	NA	#CDSGELGR	NA	1	NA	1.06	1.06	NA	NA
Q63HN8	4937	RNF213	RNF213_C4937	RN213_HUMAN E3 ubiquitin-protein ligase RNF213 OS=Homo sapiens OX=9606 GN=RNF213 PE=1 SV=3	NA	#CQYQVEEGR	NA	2	NA	1.06	1.06	NA	NA
P00352	133	ALDH1A1	ALDH1A1_C133	AL1A1_HUMAN Retinal dehydrogenase 1 OS=Homo sapiens OX=9606 GN=ALDH1A1 PE=1 SV=2	#CAGWADK	#CAGWADK	1	2	1.56	0.55	1.055	0.714178	67.6946
Q5SRE5	95	NUP188	NUP188_C95	NU188_HUMAN Nucleoporin NUP188 homolog OS=Homo sapiens OX=9606 GN=NUP188 PE=1 SV=1	#CYLQEDYR	#CYLQEDYR	2	3	1.42	0.69	1.055	0.516188	48.9278
Q8IXI2	559	RHOT1	RHOT1_C559	MIRO1_HUMAN Mitochondrial Rho GTPase 1 OS=Homo sapiens OX=9606 GN=RHOT1 PE=1 SV=2	#CNTADAPSK	NA	2	NA	1.055	NA	1.055	NA	NA
Q9Y6N5	201	SQOR	SQOR_C201	SQOR_HUMAN Sulfide:quinone oxidoreductase, mitochondrial OS=Homo sapiens OX=9606 GN=SQOR PE=1 SV=1	NA	#CAGAPQK	NA	2	NA	1.055	1.055	NA	NA
P78346	257	RPP30	RPP30_C257	RPP30_HUMAN Ribonuclease P protein subunit p30 OS=Homo sapiens OX=9606 GN=RPP30 PE=1 SV=1	#CIPASK	NA	1	NA	1.05	NA	1.05	NA	NA
P55060	842	CSE1L	CSE1L_C842	XPO2_HUMAN Exportin-2 OS=Homo sapiens OX=9606 GN=CSE1L PE=1 SV=3	#CAVGITK	NA	1	NA	1.05	NA	1.05	NA	NA
Q9H4A6	84	GOLPH3	GOLPH3_C84	GOLP3_HUMAN Golgi phosphoprotein 3 OS=Homo sapiens OX=9606 GN=GOLPH3 PE=1 SV=1	#CISSGLR	NA	1	NA	1.05	NA	1.05	NA	NA
Q01814	898	ATP2B2	ATP2B2_C898	AT2B2_HUMAN Plasma membrane calcium-transporting ATPase 2 OS=Homo sapiens OX=9606 GN=ATP2B2 PE=1 SV=2	#CITQDSPLK	NA	1	NA	1.05	NA	1.05	NA	NA
Q9NVU7	87	SDAD1	SDAD1_C87	SDA1_HUMAN Protein SDA1 homolog OS=Homo sapiens OX=9606 GN=SDAD1 PE=1 SV=3	#CNHTVLDPDLR	NA	1	NA	1.05	NA	1.05	NA	NA
Q9NQX7	96	ITM2C	ITM2C_C96	ITM2C_HUMAN Integral membrane protein 2C OS=Homo sapiens OX=9606 GN=ITM2C PE=1 SV=1	#CGVLYEDSLSSQVR	NA	2	NA	1.05	NA	1.05	NA	NA
O60237	723	PPP1R12B	PPP1R12B_C723	MYPT2_HUMAN Protein phosphatase 1 regulatory subunit 12B OS=Homo sapiens OX=9606 GN=PPP1R12B PE=1 SV=2	#CPAQPDKPTTPASPSTSR	NA	1	NA	1.05	NA	1.05	NA	NA
Q9H6S3	10	EPS8L2	EPS8L2_C10	ES8L2_HUMAN Epidermal growth factor receptor kinase substrate 8-like protein 2 OS=Homo sapiens OX=9606 GN=EPS8L2 PE=1 SV=2	#CPGATNGSLGR	NA	3	NA	1.05	NA	1.05	NA	NA
Q9UHB6	164	LIMA1	LIMA1_C164	LIMA1_HUMAN LIM domain and actin-binding protein 1 OS=Homo sapiens OX=9606 GN=LIMA1 PE=1 SV=1	#CLGESR	NA	1	NA	1.05	NA	1.05	NA	NA
P21333	1453	FLNA	FLNA_C1453	FLNA_HUMAN Filamin-A OS=Homo sapiens OX=9606 GN=FLNA PE=1 SV=4	#CSGPGLSPGMVR	#CSGPGLSPGMVR	4	4	1.04	1.06	1.05	0.0141421	1.34687
P63010	57	AP2B1	AP2B1_C57	AP2B1_HUMAN AP-2 complex subunit beta OS=Homo sapiens OX=9606 GN=AP2B1 PE=1 SV=1	#CMQTDNLELK	#CMQTDNLELK	2	1	0.9	1.2	1.05	0.212132	20.2031
P62306	66	SNRPF	SNRPF_C66	RUXF_HUMAN Small nuclear ribonucleoprotein F OS=Homo sapiens OX=9606 GN=SNRPF PE=1 SV=1	NA	#CNNVLYIR	NA	2	NA	1.05	1.05	NA	NA
Q9BVA0	344	KATNB1	KATNB1_C344	KTNB1_HUMAN Katanin p80 WD40 repeat-containing subunit B1 OS=Homo sapiens OX=9606 GN=KATNB1 PE=1 SV=1	NA	#CSKPQR	NA	1	NA	1.05	1.05	NA	NA
P30566	113	ADSL	ADSL_C113	PUR8_HUMAN Adenylosuccinate lyase OS=Homo sapiens OX=9606 GN=ADSL PE=1 SV=2	NA	#CYVGDNTDLIILR	NA	1	NA	1.05	1.05	NA	NA
Q9H0D6	21	XRN2	XRN2_C21	XRN2_HUMAN 5'-3' exoribonuclease 2 OS=Homo sapiens OX=9606 GN=XRN2 PE=1 SV=1	NA	#CVEEKPK	NA	1	NA	1.05	1.05	NA	NA
O15027	2293	SEC16A	SEC16A_C2293	SC16A_HUMAN Protein transport protein Sec16A OS=Homo sapiens OX=9606 GN=SEC16A PE=1 SV=4	NA	#CSSMSSLSR	NA	1	NA	1.05	1.05	NA	NA
Q6NZY4	633	ZCCHC8	ZCCHC8_C633	ZCHC8_HUMAN Zinc finger CCHC domain-containing protein 8 OS=Homo sapiens OX=9606 GN=ZCCHC8 PE=1 SV=2	NA	#CDISNGGSQK	NA	1	NA	1.05	1.05	NA	NA
Q96A65	619	EXOC4	EXOC4_C619	EXOC4_HUMAN Exocyst complex component 4 OS=Homo sapiens OX=9606 GN=EXOC4 PE=1 SV=1	NA	#CTAAYR	NA	1	NA	1.05	1.05	NA	NA
Q99614	28	TTC1	TTC1_C28	TTC1_HUMAN Tetratricopeptide repeat protein 1 OS=Homo sapiens OX=9606 GN=TTC1 PE=1 SV=1	#CAGPPVPDPK	#CAGPPVPDPK	1	3	0.94	1.16	1.05	0.155563	14.8156
Q9C0C2	136	TNKS1BP1	TNKS1BP1_C136	TB182_HUMAN 182 kDa tankyrase-1-binding protein OS=Homo sapiens OX=9606 GN=TNKS1BP1 PE=1 SV=4	#CAAPGGVR	#CAAPGGVR	1	2	1.09	1.005	1.0475	0.0601041	5.73786
P53396	764	ACLY	ACLY_C764	ACLY_HUMAN ATP-citrate synthase OS=Homo sapiens OX=9606 GN=ACLY PE=1 SV=3	#CANQASETAVAK	#CANQASE #CANQASETAVAK	4	3	1.065	1.03	1.0475	0.0247487	2.36265
P60981	135	DSTN	DSTN_C135	DEST_HUMAN Destrin OS=Homo sapiens OX=9606 GN=DSTN PE=1 SV=3	#CQANGPEDLNR #CQANGPEDLNRA	#CQANGPEDLNR #CQANGPEDLNRA	6	7	1.04	1.05	1.045	0.00707107	0.676657
Q92621	1855	NUP205	NUP205_C1855	NU205_HUMAN Nuclear pore complex protein Nup205 OS=Homo sapiens OX=9606 GN=NUP205 PE=1 SV=3	#CQSVMPAGVDK	#CQSVMPAGVDK	1	3	1.04	1.05	1.045	0.00707107	0.676657
O60292	1577	SIPA1L3	SIPA1L3_C1577	SI1L3_HUMAN Signal-induced proliferation-associated 1-like protein 3 OS=Homo sapiens OX=9606 GN=SIPA1L3 PE=1 SV=3	#CAFPSSTLPAR	#CAFPSSTLPAR	1	2	1.01	1.08	1.045	0.0494975	4.7366
P17812	491	CTPS1	CTPS1_C491	PYRG1_HUMAN CTP synthase 1 OS=Homo sapiens OX=9606 GN=CTPS1 PE=1 SV=2	#CLEEQGLK	#CLEEQGLK	3	1	1.34	0.74	1.04	0.424264	40.7946
Q5J8M3	69	EMC4	EMC4_C69	EMC4_HUMAN ER membrane protein complex subunit 4 OS=Homo sapiens OX=9606 GN=EMC4 PE=1 SV=2	#CWDIALGPLK	#CWDIALGPLK	2	1	1.24	0.84	1.04	0.282843	27.1964
O15438	1419	ABCC3	ABCC3_C1419	MRP3_HUMAN Canalicular multispecific organic anion transporter 2 OS=Homo sapiens OX=9606 GN=ABCC3 PE=1 SV=3	#CSEGGENLSVGQR	#CSEGGENLSVGQR	1	2	1.09	0.99	1.04	0.0707107	6.7991
Q68D10	535	SPTY2D1	SPTY2D1_C535	SPT2_HUMAN Protein SPT2 homolog OS=Homo sapiens OX=9606 GN=SPTY2D1 PE=1 SV=3	#CTVVSETISSK	#CTVVSETISSK	2	2	1.06	1.02	1.04	0.0282843	2.71964
Q96L91	1761	EP400	EP400_C1761	EP400_HUMAN E1A-binding protein p400 OS=Homo sapiens OX=9606 GN=EP400 PE=1 SV=4	#CSQAPVYGR	NA	1	NA	1.04	NA	1.04	NA	NA
Q02790	107	FKBP4	FKBP4_C107	FKBP4_HUMAN Peptidyl-prolyl cis-trans isomerase FKBP4 OS=Homo sapiens OX=9606 GN=FKBP4 PE=1 SV=3	#CKPEYAYGSAGSPPK	NA	2	NA	1.04	NA	1.04	NA	NA
Q9UPN3	4437	MACF1	MACF1_C4437	MACF1_HUMAN Microtubule-actin cross-linking factor 1, isoforms 1/2/3/5 OS=Homo sapiens OX=9606 GN=MACF1 PE=1 SV=4	#CDMSDVNLK	NA	1	NA	1.04	NA	1.04	NA	NA
Q53HC9	198	EIPR1	EIPR1_C198	EIPR1_HUMAN EARP and GARP complex-interacting protein 1 OS=Homo sapiens OX=9606 GN=EIPR1 PE=1 SV=2	#CTQVATANDTTLR	NA	2	NA	1.04	NA	1.04	NA	NA
P52788	337	SMS	SMS_C337	SPSY_HUMAN Spermine synthase OS=Homo sapiens OX=9606 GN=SMS PE=1 SV=2	#CPVEFSK	NA	2	NA	1.04	NA	1.04	NA	NA
P53621	1191	COPA	COPA_C1191	COPA_HUMAN Coatomer subunit alpha OS=Homo sapiens OX=9606 GN=COPA PE=1 SV=2	#CYSPEFK	NA	2	NA	1.04	NA	1.04	NA	NA
Q14204	1888	DYNC1H1	DYNC1H1_C1888	DYHC1_HUMAN Cytoplasmic dynein 1 heavy chain 1 OS=Homo sapiens OX=9606 GN=DYNC1H1 PE=1 SV=5	#CYLTMTQALEAR	NA	5	NA	1.04	NA	1.04	NA	NA
Q96PU8	35	QKI	QKI_C35	QKI_HUMAN Protein quaking OS=Homo sapiens OX=9606 GN=QKI PE=1 SV=1	#CGIFNHLER	NA	2	NA	1.04	NA	1.04	NA	NA
Q6FI81	277	CIAPIN1	CIAPIN1_C277	CPIN1_HUMAN Anamorsin OS=Homo sapiens OX=9606 GN=CIAPIN1 PE=1 SV=2	#CYLGDAFR	NA	1	NA	1.04	NA	1.04	NA	NA
Q32MZ4	750	LRRFIP1	LRRFIP1_C750	LRRF1_HUMAN Leucine-rich repeat flightless-interacting protein 1 OS=Homo sapiens OX=9606 GN=LRRFIP1 PE=1 SV=2	#CEMSEHPSQTVR	NA	2	NA	1.04	NA	1.04	NA	NA
P35790	22	CHKA	CHKA_C22	CHKA_HUMAN Choline kinase alpha OS=Homo sapiens OX=9606 GN=CHKA PE=1 SV=3	#CGSGSAAPAPGVGQQR	NA	1	NA	1.04	NA	1.04	NA	NA
Q5SVZ6	899	ZMYM1	ZMYM1_C899	ZMYM1_HUMAN Zinc finger MYM-type protein 1 OS=Homo sapiens OX=9606 GN=ZMYM1 PE=1 SV=1	#CLSSER	NA	2	NA	1.04	NA	1.04	NA	NA
Q29RF7	14	PDS5A	PDS5A_C14	PDS5A_HUMAN Sister chromatid cohesion protein PDS5 homolog A OS=Homo sapiens OX=9606 GN=PDS5A PE=1 SV=1	#CGVVSADGK	NA	2	NA	1.04	NA	1.04	NA	NA
P54646	382	PRKAA2	PRKAA2_C382	AAPK2_HUMAN 5'-AMP-activated protein kinase catalytic subunit alpha-2 OS=Homo sapiens OX=9606 GN=PRKAA2 PE=1 SV=2	NA	#CPLDALNTTKPK	NA	1	NA	1.04	1.04	NA	NA
Q9UHR4	194	BAIAP2L1	BAIAP2L1_C194	BI2L1_HUMAN Brain-specific angiogenesis inhibitor 1-associated protein 2-like protein 1 OS=Homo sapiens OX=9606 GN=BAIAP2L1 PE=1 SV=2	NA	#CFLVDK	NA	1	NA	1.04	1.04	NA	NA
Q8TD55	388	PLEKHO2	PLEKHO2_C388	PKHO2_HUMAN Pleckstrin homology domain-containing family O member 2 OS=Homo sapiens OX=9606 GN=PLEKHO2 PE=1 SV=1	NA	#CSSLGDLLGEGPR	NA	1	NA	1.04	1.04	NA	NA
Q9ULW0	145	TPX2	TPX2_C145	TPX2_HUMAN Targeting protein for Xklp2 OS=Homo sapiens OX=9606 GN=TPX2 PE=1 SV=2	NA	#CATPVIIDEILPSK	NA	1	NA	1.04	1.04	NA	NA
Q13501	27	SQSTM1	SQSTM1_C27	SQSTM_HUMAN Sequestosome-1 OS=Homo sapiens OX=9606 GN=SQSTM1 PE=1 SV=1	#CSPEPEAEAEAAAGPGPCER	#CSPEPEAEAEAAAGPGPCER	2	6	1.055	1.02	1.0375	0.0247487	2.38542
Q9H7D7	238	WDR26	WDR26_C238	WDR26_HUMAN WD repeat-containing protein 26 OS=Homo sapiens OX=9606 GN=WDR26 PE=1 SV=3	#CELTPLK	#CELTPLK	2	1	1.045	1.03	1.0375	0.0106066	1.02232
Q00839	594	HNRNPU	HNRNPU_C594	HNRPU_HUMAN Heterogeneous nuclear ribonucleoprotein U OS=Homo sapiens OX=9606 GN=HNRNPU PE=1 SV=6	#CLFAGFQR	#CLFAGFQR	2	3	1.015	1.06	1.0375	0.0318198	3.06697
Q68CZ2	615	TNS3	TNS3_C615	TENS3_HUMAN Tensin-3 OS=Homo sapiens OX=9606 GN=TNS3 PE=1 SV=2	#CPADNPGLVQAQPR	#CPADNPGLVQAQPR	6	8	1.005	1.07	1.0375	0.0459619	4.43007
Q9P2J5	92	LARS	LARS_C92	SYLC_HUMAN Leucine--tRNA ligase, cytoplasmic OS=Homo sapiens OX=9606 GN=LARS PE=1 SV=2	#CTGMPIK	#CTGMPIK	1	1	1.12	0.95	1.035	0.120208	11.6143
P51610	1139	HCFC1	HCFC1_C1139	HCFC1_HUMAN Host cell factor 1 OS=Homo sapiens OX=9606 GN=HCFC1 PE=1 SV=2	#CAAGTPAVIR	#CAAGTPAVIR	1	2	1.08	0.99	1.035	0.0636396	6.14875
O00410	972	IPO5	IPO5_C972	IPO5_HUMAN Importin-5 OS=Homo sapiens OX=9606 GN=IPO5 PE=1 SV=4	#CISAVGK	#CISAVGK	3	2	1.06	1.01	1.035	0.0353553	3.41597
Q9NRR8	11	CDC42SE1	CDC42SE1_C11	C42S1_HUMAN CDC42 small effector protein 1 OS=Homo sapiens OX=9606 GN=CDC42SE1 PE=1 SV=1	#CVVEKPQPK	#CVVEKPQPK	2	1	0.92	1.15	1.035	0.162635	15.7135
Q99547	67	MPHOSPH6	MPHOSPH6_C67	MPH6_HUMAN M-phase phosphoprotein 6 OS=Homo sapiens OX=9606 GN=MPHOSPH6 PE=1 SV=2	#CEDLLYGR	#CEDLLYGR	2	2	0.82	1.25	1.035	0.304056	29.3774
O75717	180	WDHD1	WDHD1_C180	WDHD1_HUMAN WD repeat and HMG-box DNA-binding protein 1 OS=Homo sapiens OX=9606 GN=WDHD1 PE=1 SV=1	#CNDVINAK	#CNDVINAK	2	1	0.61	1.46	1.035	0.601041	58.0716
P27708	1889	CAD	CAD_C1889	PYR1_HUMAN CAD protein OS=Homo sapiens OX=9606 GN=CAD PE=1 SV=3	NA	#CYPPPPVPR	NA	2	NA	1.035	1.035	NA	NA
Q92973	103	TNPO1	TNPO1_C103	TNPO1_HUMAN Transportin-1 OS=Homo sapiens OX=9606 GN=TNPO1 PE=1 SV=2	#CLNNIGDSSPLIR	#CLNNIGDSSPLIR	1	2	1.06	1.005	1.0325	0.0388909	3.76667
Q14204	4216	DYNC1H1	DYNC1H1_C4216	DYHC1_HUMAN Cytoplasmic dynein 1 heavy chain 1 OS=Homo sapiens OX=9606 GN=DYNC1H1 PE=1 SV=5	#CDTVDTWLDDTAK	#CDTVDTWLDDTAK	2	1	1.045	1.02	1.0325	0.0176777	1.71212
Q15365	201	PCBP1	PCBP1_C201	PCBP1_HUMAN Poly(rC)-binding protein 1 OS=Homo sapiens OX=9606 GN=PCBP1 PE=1 SV=2	#CSDAAGYPHATHDLEGPPLDAY #CSDAAGYPH #CSDAAGYPHAT	#CSDAAGYPHATHDLEGPPLDAY #CSDAAGYPH	7	8	1.04	1.025	1.0325	0.0106066	1.02727
P52272	114	HNRNPM	HNRNPM_C114	HNRPM_HUMAN Heterogeneous nuclear ribonucleoprotein M OS=Homo sapiens OX=9606 GN=HNRNPM PE=1 SV=3	#CAVVEFK	#CAVVEFK	1	5	1.17	0.89	1.03	0.19799	19.2223
P27816	635	MAP4	MAP4_C635	MAP4_HUMAN Microtubule-associated protein 4 OS=Homo sapiens OX=9606 GN=MAP4 PE=1 SV=3	#CSLPAEEDSVLEK	#CSLPAEEDSVLEK	1	3	1.07	0.99	1.03	0.0565685	5.49209
Q08499	800	PDE4D	PDE4D_C800	PDE4D_HUMAN cAMP-specific 3',5'-cyclic phosphodiesterase 4D OS=Homo sapiens OX=9606 GN=PDE4D PE=1 SV=2	#CVIDDR	NA	1	NA	1.03	NA	1.03	NA	NA
Q86VP6	237	CAND1	CAND1_C237	CAND1_HUMAN Cullin-associated NEDD8-dissociated protein 1 OS=Homo sapiens OX=9606 GN=CAND1 PE=1 SV=2	#CIAAISR	NA	1	NA	1.03	NA	1.03	NA	NA
Q15269	24	PWP2	PWP2_C24	PWP2_HUMAN Periodic tryptophan protein 2 homolog OS=Homo sapiens OX=9606 GN=PWP2 PE=2 SV=2	#CDGNSVISPVGNR	NA	1	NA	1.03	NA	1.03	NA	NA
Q92616	246	GCN1	GCN1_C246	GCN1_HUMAN eIF-2-alpha kinase activator GCN1 OS=Homo sapiens OX=9606 GN=GCN1 PE=1 SV=6	#CAPLLR	NA	2	NA	1.03	NA	1.03	NA	NA
O00139	406	KIF2A	KIF2A_C406	KIF2A_HUMAN Kinesin-like protein KIF2A OS=Homo sapiens OX=9606 GN=KIF2A PE=1 SV=3	#CVEDVLK	NA	1	NA	1.03	NA	1.03	NA	NA
P60174	79	TPI1	TPI1_C79	TPIS_HUMAN Triosephosphate isomerase OS=Homo sapiens OX=9606 GN=TPI1 PE=1 SV=3	#CAPPTAYIDFAR	NA	1	NA	1.03	NA	1.03	NA	NA
P35754	83	GLRX	GLRX_C83	GLRX1_HUMAN Glutaredoxin-1 OS=Homo sapiens OX=9606 GN=GLRX PE=1 SV=2	#CSDLVSLQQSGELLTR	NA	2	NA	1.03	NA	1.03	NA	NA
P11182	279	DBT	DBT_C279	ODB2_HUMAN Lipoamide acyltransferase component of branched-chain alpha-keto acid dehydrogenase complex, mitochondrial OS=Homo sapiens OX=9606 GN=DBT PE=1 SV=3	#CDEIDLTELVK	NA	1	NA	1.03	NA	1.03	NA	NA
Q92600	99	CNOT9	CNOT9_C99	CNOT9_HUMAN CCR4-NOT transcription complex subunit 9 OS=Homo sapiens OX=9606 GN=CNOT9 PE=1 SV=1	#CVASHPETR	NA	2	NA	1.03	NA	1.03	NA	NA
Q9Y4C2	598	TCAF1	TCAF1_C598	TCAF1_HUMAN TRPM8 channel-associated factor 1 OS=Homo sapiens OX=9606 GN=TCAF1 PE=1 SV=3	#CLDKPTK	NA	1	NA	1.03	NA	1.03	NA	NA
P51957	326	NEK4	NEK4_C326	NEK4_HUMAN Serine/threonine-protein kinase Nek4 OS=Homo sapiens OX=9606 GN=NEK4 PE=1 SV=2	#CLSQEKPR	NA	1	NA	1.03	NA	1.03	NA	NA
P43353	223	ALDH3B1	ALDH3B1_C223	AL3B1_HUMAN Aldehyde dehydrogenase family 3 member B1 OS=Homo sapiens OX=9606 GN=ALDH3B1 PE=1 SV=1	#CDPQTVANR	NA	1	NA	1.03	NA	1.03	NA	NA
Q8NCW5	91	NAXE	NAXE_C91	NNRE_HUMAN NAD(P)H-hydrate epimerase OS=Homo sapiens OX=9606 GN=NAXE PE=1 SV=2	#CATAIAK	NA	1	NA	1.03	NA	1.03	NA	NA
Q7Z2E3	161	APTX	APTX_C161	APTX_HUMAN Aprataxin OS=Homo sapiens OX=9606 GN=APTX PE=1 SV=2	#CSVPLKK	NA	1	NA	1.03	NA	1.03	NA	NA
Q76FK4	259	NOL8	NOL8_C259	NOL8_HUMAN Nucleolar protein 8 OS=Homo sapiens OX=9606 GN=NOL8 PE=1 SV=1	#CDSITPSK	NA	2	NA	1.03	NA	1.03	NA	NA
O43592	938	XPOT	XPOT_C938	XPOT_HUMAN Exportin-T OS=Homo sapiens OX=9606 GN=XPOT PE=1 SV=2	#CQALQQPDAK	NA	2	NA	1.03	NA	1.03	NA	NA
Q9UPN3	4206	MACF1	MACF1_C4206	MACF1_HUMAN Microtubule-actin cross-linking factor 1, isoforms 1/2/3/5 OS=Homo sapiens OX=9606 GN=MACF1 PE=1 SV=4	#CLQQQEK	#CLQQQEK	2	1	1.01	1.05	1.03	0.0282843	2.74605
Q6UX53	96	METTL7B	METTL7B_C96	MET7B_HUMAN Methyltransferase-like protein 7B OS=Homo sapiens OX=9606 GN=METTL7B PE=1 SV=2	#CLDPNPHFEK	#CLDPNPHFEK	2	3	0.93	1.13	1.03	0.141421	13.7302
Q9BWE0	167	REPIN1	REPIN1_C167	REPI1_HUMAN Replication initiator 1 OS=Homo sapiens OX=9606 GN=REPIN1 PE=1 SV=1	#CHPPAPEAR	#CHPPAPEAR	3	1	0.93	1.13	1.03	0.141421	13.7302
Q9BTC0	350	DIDO1	DIDO1_C350	DIDO1_HUMAN Death-inducer obliterator 1 OS=Homo sapiens OX=9606 GN=DIDO1 PE=1 SV=5	NA	#CTSIGTIEQK	NA	1	NA	1.03	1.03	NA	NA
Q14980	1937	NUMA1	NUMA1_C1937	NUMA1_HUMAN Nuclear mitotic apparatus protein 1 OS=Homo sapiens OX=9606 GN=NUMA1 PE=1 SV=2	NA	#CYPLESR	NA	1	NA	1.03	1.03	NA	NA
P48506	142	GCLC	GCLC_C142	GSH1_HUMAN Glutamate--cysteine ligase catalytic subunit OS=Homo sapiens OX=9606 GN=GCLC PE=1 SV=2	NA	#CTITSFPR	NA	1	NA	1.03	1.03	NA	NA
Q6PJG2	16	ELMSAN1	ELMSAN1_C16	EMSA1_HUMAN ELM2 and SANT domain-containing protein 1 OS=Homo sapiens OX=9606 GN=ELMSAN1 PE=1 SV=2	NA	#CLFGGQEPAPK	NA	1	NA	1.03	1.03	NA	NA
Q6PJG2	502	ELMSAN1	ELMSAN1_C502	EMSA1_HUMAN ELM2 and SANT domain-containing protein 1 OS=Homo sapiens OX=9606 GN=ELMSAN1 PE=1 SV=2	NA	#CGVEFSEPSLATK	NA	2	NA	1.03	1.03	NA	NA
O60353	527	FZD6	FZD6_C527	FZD6_HUMAN Frizzled-6 OS=Homo sapiens OX=9606 GN=FZD6 PE=1 SV=2	NA	#CEFFLK	NA	1	NA	1.03	1.03	NA	NA
Q99590	506	SCAF11	SCAF11_C506	SCAFB_HUMAN Protein SCAF11 OS=Homo sapiens OX=9606 GN=SCAF11 PE=1 SV=2	NA	#CLESEISENILEK	NA	2	NA	1.03	1.03	NA	NA
Q9ULV4	420	CORO1C	CORO1C_C420	COR1C_HUMAN Coronin-1C OS=Homo sapiens OX=9606 GN=CORO1C PE=1 SV=1	#CDLISIPK	#CDLISIPK	2	2	1.05	1.005	1.0275	0.0318198	3.09682
Q7L576	98	CYFIP1	CYFIP1_C98	CYFP1_HUMAN Cytoplasmic FMR1-interacting protein 1 OS=Homo sapiens OX=9606 GN=CYFIP1 PE=1 SV=1	#CNEQPNRVEIY	#CNEQPNRVEIYEK	1	1	1.46	0.59	1.025	0.615183	60.0178
P05023	663	ATP1A1	ATP1A1_C663	AT1A1_HUMAN Sodium/potassium-transporting ATPase subunit alpha-1 OS=Homo sapiens OX=9606 GN=ATP1A1 PE=1 SV=1	#CVVHGS #CVVHGSDLK	#CVVHGSDLK	4	4	1.16	0.89	1.025	0.190919	18.6262
Q9HB90	52	RRAGC	RRAGC_C52	RRAGC_HUMAN Ras-related GTP-binding protein C OS=Homo sapiens OX=9606 GN=RRAGC PE=1 SV=1	#CGPGGADSSKPR	#CGPGGADSSKPR	1	1	1.04	1.01	1.025	0.0212132	2.06958
P48507	194	GCLM	GCLM_C194	GSH0_HUMAN Glutamate--cysteine ligase regulatory subunit OS=Homo sapiens OX=9606 GN=GCLM PE=1 SV=1	#CVMPPDLTAFAK	#CVMPPDLTAFAK	2	3	1.03	1.02	1.025	0.00707107	0.68986
Q8N7H5	36	PAF1	PAF1_C36	PAF1_HUMAN RNA polymerase II-associated factor 1 homolog OS=Homo sapiens OX=9606 GN=PAF1 PE=1 SV=2	#CNSLPDIPFDPK	#CNSLPDIPFDPK	1	1	0.71	1.34	1.025	0.445477	43.4612
Q8WZA9	373	IRGQ	IRGQ_C373	IRGQ_HUMAN Immunity-related GTPase family Q protein OS=Homo sapiens OX=9606 GN=IRGQ PE=1 SV=1	NA	#CSAGSQK	NA	2	NA	1.025	1.025	NA	NA
Q12857	103	NFIA	NFIA_C103	NFIA_HUMAN Nuclear factor 1 A-type OS=Homo sapiens OX=9606 GN=NFIA PE=1 SV=2	#CVLSNPDQK	#CVLSNPDQK	2	2	1.3	0.74	1.02	0.39598	38.8215
P17301	1019	ITGA2	ITGA2_C1019	ITA2_HUMAN Integrin alpha-2 OS=Homo sapiens OX=9606 GN=ITGA2 PE=1 SV=1	#CNADINPLK	#CNADINPLK	1	2	1.09	0.95	1.02	0.0989949	9.70539
P27708	1682	CAD	CAD_C1682	PYR1_HUMAN CAD protein OS=Homo sapiens OX=9606 GN=CAD PE=1 SV=3	#CFASDHAPHTLEEK #CFASDHAPHTL	NA	2	NA	1.02	NA	1.02	NA	NA
P30838	252	ALDH3A1	ALDH3A1_C252	AL3A1_HUMAN Aldehyde dehydrogenase, dimeric NADP-preferring OS=Homo sapiens OX=9606 GN=ALDH3A1 PE=1 SV=3	#CDPSIQNQIVEK	NA	1	NA	1.02	NA	1.02	NA	NA
Q86V48	969	LUZP1	LUZP1_C969	LUZP1_HUMAN Leucine zipper protein 1 OS=Homo sapiens OX=9606 GN=LUZP1 PE=1 SV=2	#CLFEQGTR	NA	1	NA	1.02	NA	1.02	NA	NA
Q52LJ0	63	FAM98B	FAM98B_C63	FA98B_HUMAN Protein FAM98B OS=Homo sapiens OX=9606 GN=FAM98B PE=1 SV=2	#CNLEESITSAGR	NA	2	NA	1.02	NA	1.02	NA	NA
Q9Y265	141	RUVBL1	RUVBL1_C141	RUVB1_HUMAN RuvB-like 1 OS=Homo sapiens OX=9606 GN=RUVBL1 PE=1 SV=1	#CETENPMGGYGK	NA	2	NA	1.02	NA	1.02	NA	NA
Q96SB3	734	PPP1R9B	PPP1R9B_C734	NEB2_HUMAN Neurabin-2 OS=Homo sapiens OX=9606 GN=PPP1R9B PE=1 SV=3	#CQAVDEHLR	NA	1	NA	1.02	NA	1.02	NA	NA
O75694	651	NUP155	NUP155_C651	NU155_HUMAN Nuclear pore complex protein Nup155 OS=Homo sapiens OX=9606 GN=NUP155 PE=1 SV=1	#CVTGPEIVYSGK	#CVTGPEIVYSGK	2	1	0.81	1.23	1.02	0.296985	29.1162
P14550	5	AKR1A1	AKR1A1_C5	AK1A1_HUMAN Aldo-keto reductase family 1 member A1 OS=Homo sapiens OX=9606 GN=AKR1A1 PE=1 SV=3	NA	#CVLLHTGQK	NA	3	NA	1.02	1.02	NA	NA
Q96R06	589	SPAG5	SPAG5_C589	SPAG5_HUMAN Sperm-associated antigen 5 OS=Homo sapiens OX=9606 GN=SPAG5 PE=1 SV=2	NA	#CAHASQR	NA	1	NA	1.02	1.02	NA	NA
Q9ULH1	557	ASAP1	ASAP1_C557	ASAP1_HUMAN Arf-GAP with SH3 domain, ANK repeat and PH domain-containing protein 1 OS=Homo sapiens OX=9606 GN=ASAP1 PE=1 SV=4	NA	#CSTSSAK	NA	1	NA	1.02	1.02	NA	NA
P30419	483	NMT1	NMT1_C483	NMT1_HUMAN Glycylpeptide N-tetradecanoyltransferase 1 OS=Homo sapiens OX=9606 GN=NMT1 PE=1 SV=2	NA	#CPSMGAEK	NA	1	NA	1.02	1.02	NA	NA
A5YKK6	1420	CNOT1	CNOT1_C1420	CNOT1_HUMAN CCR4-NOT transcription complex subunit 1 OS=Homo sapiens OX=9606 GN=CNOT1 PE=1 SV=2	NA	#CEQIVR	NA	1	NA	1.02	1.02	NA	NA
Q9BY42	3	RTF2	RTF2_C3	RTF2_HUMAN Replication termination factor 2 OS=Homo sapiens OX=9606 GN=RTF2 PE=1 SV=3	#CDGGTIPK	#CDGGTIPK	1	1	1.05	0.98	1.015	0.0494975	4.8766
P23396	97	RPS3	RPS3_C97	RS3_HUMAN 40S ribosomal protein S3 OS=Homo sapiens OX=9606 GN=RPS3 PE=1 SV=2	#CAIAQAESLR	#CAIAQAESLR	2	2	1.04	0.99	1.015	0.0353553	3.48328
P57764	56	GSDMD	GSDMD_C56	GSDMD_HUMAN Gasdermin-D OS=Homo sapiens OX=9606 GN=GSDMD PE=1 SV=1	#CVNLSIK	#CVNLSIK	1	2	1.02	1.01	1.015	0.00707107	0.696657
Q99832	511	CCT7	CCT7_C511	TCPH_HUMAN T-complex protein 1 subunit eta OS=Homo sapiens OX=9606 GN=CCT7 PE=1 SV=2	#CLIVSVDETIK	#CLIVSVDETIK	1	1	1.02	1.01	1.015	0.00707107	0.696657
Q14247	112	CTTN	CTTN_C112	SRC8_HUMAN Src substrate cortactin OS=Homo sapiens OX=9606 GN=CTTN PE=1 SV=2	#CSQVDSVR	#CSQVDSVR	1	3	1.01	1.02	1.015	0.00707107	0.696657
P62280	60	RPS11	RPS11_C60	RS11_HUMAN 40S ribosomal protein S11 OS=Homo sapiens OX=9606 GN=RPS11 PE=1 SV=3	#CPFTGNVSIR	#CPFTGNVSIR	5	7	0.93	1.1	1.015	0.120208	11.8432
Q5H9R7	844	PPP6R3	PPP6R3_C844	PP6R3_HUMAN Serine/threonine-protein phosphatase 6 regulatory subunit 3 OS=Homo sapiens OX=9606 GN=PPP6R3 PE=1 SV=2	#CAAPRPPSSSPEQR	#CAAPRPPSSSPEQR	5	3	0.93	1.1	1.015	0.120208	11.8432
Q96G74	143	OTUD5	OTUD5_C143	OTUD5_HUMAN OTU domain-containing protein 5 OS=Homo sapiens OX=9606 GN=OTUD5 PE=1 SV=1	NA	#CSGPGHSK	NA	4	NA	1.015	1.015	NA	NA
Q86W50	518	METTL16	METTL16_C518	MET16_HUMAN RNA N6-adenosine-methyltransferase METTL16 OS=Homo sapiens OX=9606 GN=METTL16 PE=1 SV=2	#CLINVK	#CLINVK	1	1	1.22	0.8	1.01	0.296985	29.4044
Q9Y4I1	660	MYO5A	MYO5A_C660	MYO5A_HUMAN Unconventional myosin-Va OS=Homo sapiens OX=9606 GN=MYO5A PE=1 SV=2	#CIKPNDFK	#CIKPNDFK	1	1	1.08	0.94	1.01	0.0989949	9.80148
Q9BVP2	158	GNL3	GNL3_C158	GNL3_HUMAN Guanine nucleotide-binding protein-like 3 OS=Homo sapiens OX=9606 GN=GNL3 PE=1 SV=2	#CPQVEEAIVQSGQK	#CPQVEEAIVQSGQK	3	2	1.08	0.94	1.01	0.0989949	9.80148
P18621	144	RPL17	RPL17_C144	RL17_HUMAN 60S ribosomal protein L17 OS=Homo sapiens OX=9606 GN=RPL17 PE=1 SV=3	#CHIEMILTEK	#CHIEMILTEK	14	11	1.08	0.94	1.01	0.0989949	9.80148
Q9UBX3	23	SLC25A10	SLC25A10_C23	DIC_HUMAN Mitochondrial dicarboxylate carrier OS=Homo sapiens OX=9606 GN=SLC25A10 PE=1 SV=2	#CTHPLDLLK	#CTHPLDLLK	3	2	1.04	0.98	1.01	0.0424264	4.20063
P46821	262	MAP1B	MAP1B_C262	MAP1B_HUMAN Microtubule-associated protein 1B OS=Homo sapiens OX=9606 GN=MAP1B PE=1 SV=2	#CYIFPGGR	#CYIFPGGR	3	3	1.02	1	1.01	0.0141421	1.40021
Q9Y2H5	996	PLEKHA6	PLEKHA6_C996	PKHA6_HUMAN Pleckstrin homology domain-containing family A member 6 OS=Homo sapiens OX=9606 GN=PLEKHA6 PE=1 SV=4	#CALATEASR	NA	1	NA	1.01	NA	1.01	NA	NA
P35227	320	PCGF2	PCGF2_C320	PCGF2_HUMAN Polycomb group RING finger protein 2 OS=Homo sapiens OX=9606 GN=PCGF2 PE=1 SV=1	#CLQTPSSTSR	NA	1	NA	1.01	NA	1.01	NA	NA
Q8IUH3	90	RBM45	RBM45_C90	RBM45_HUMAN RNA-binding protein 45 OS=Homo sapiens OX=9606 GN=RBM45 PE=1 SV=1	#CLGPNDTKPIK	NA	3	NA	1.01	NA	1.01	NA	NA
Q14353	91	GAMT	GAMT_C91	GAMT_HUMAN Guanidinoacetate N-methyltransferase OS=Homo sapiens OX=9606 GN=GAMT PE=1 SV=1	#CNDGVFQR	NA	1	NA	1.01	NA	1.01	NA	NA
P55209	258	NAP1L1	NAP1L1_C258	NP1L1_HUMAN Nucleosome assembly protein 1-like 1 OS=Homo sapiens OX=9606 GN=NAP1L1 PE=1 SV=1	#CQIDWK	NA	1	NA	1.01	NA	1.01	NA	NA
P06756	97	ITGAV	ITGAV_C97	ITAV_HUMAN Integrin alpha-V OS=Homo sapiens OX=9606 GN=ITGAV PE=1 SV=2	#CQPIEFDATGNR	NA	1	NA	1.01	NA	1.01	NA	NA
Q02218	802	OGDH	OGDH_C802	ODO1_HUMAN 2-oxoglutarate dehydrogenase, mitochondrial OS=Homo sapiens OX=9606 GN=OGDH PE=1 SV=3	#CNDDPDVLPDLK	NA	1	NA	1.01	NA	1.01	NA	NA
Q9HBH5	97	RDH14	RDH14_C97	RDH14_HUMAN Retinol dehydrogenase 14 OS=Homo sapiens OX=9606 GN=RDH14 PE=1 SV=1	#CGPEPGVSGVGELIVR	NA	1	NA	1.01	NA	1.01	NA	NA
Q9BQG0	968	MYBBP1A	MYBBP1A_C968	MBB1A_HUMAN Myb-binding protein 1A OS=Homo sapiens OX=9606 GN=MYBBP1A PE=1 SV=2	#CLDLNLVTR	NA	1	NA	1.01	NA	1.01	NA	NA
O94992	122	HEXIM1	HEXIM1_C122	HEXI1_HUMAN Protein HEXIM1 OS=Homo sapiens OX=9606 GN=HEXIM1 PE=1 SV=1	#CHDSEASKL	NA	1	NA	1.01	NA	1.01	NA	NA
P63244	249	RACK1	RACK1_C249	RACK1_HUMAN Receptor of activated protein C kinase 1 OS=Homo sapiens OX=9606 GN=RACK1 PE=1 SV=3	#CAATGPSIK	NA	2	NA	1.01	NA	1.01	NA	NA
Q96SB3	272	PPP1R9B	PPP1R9B_C272	NEB2_HUMAN Neurabin-2 OS=Homo sapiens OX=9606 GN=PPP1R9B PE=1 SV=3	#CPAGQQPPQHR	#CPAGQQPPQHR	1	1	0.98	1.04	1.01	0.0424264	4.20063
P49411	127	TUFM	TUFM_C127	EFTU_HUMAN Elongation factor Tu, mitochondrial OS=Homo sapiens OX=9606 GN=TUFM PE=1 SV=2	#CPGHADYVK	#CPGHADYVK	2	2	0.81	1.21	1.01	0.282843	28.0042
Q7Z460	1212	CLASP1	CLASP1_C1212	CLAP1_HUMAN CLIP-associating protein 1 OS=Homo sapiens OX=9606 GN=CLASP1 PE=1 SV=1	NA	#CDIVSR	NA	1	NA	1.01	1.01	NA	NA
Q8TED1	108	GPX8	GPX8_C108	GPX8_HUMAN Probable glutathione peroxidase 8 OS=Homo sapiens OX=9606 GN=GPX8 PE=1 SV=2	NA	#CNQFGESEPR	NA	1	NA	1.01	1.01	NA	NA
O60563	160	CCNT1	CCNT1_C160	CCNT1_HUMAN Cyclin-T1 OS=Homo sapiens OX=9606 GN=CCNT1 PE=1 SV=1	NA	#CTQLVR	NA	1	NA	1.01	1.01	NA	NA
Q9BV44	239	THUMPD3	THUMPD3_C239	THUM3_HUMAN THUMP domain-containing protein 3 OS=Homo sapiens OX=9606 GN=THUMPD3 PE=1 SV=1	NA	#CFTSNEAAR	NA	2	NA	1.01	1.01	NA	NA
Q9HD26	20	GOPC	GOPC_C20	GOPC_HUMAN Golgi-associated PDZ and coiled-coil motif-containing protein OS=Homo sapiens OX=9606 GN=GOPC PE=1 SV=1	NA	#CSVGAPGGVSMFR	NA	1	NA	1.01	1.01	NA	NA
P40763	542	STAT3	STAT3_C542	STAT3_HUMAN Signal transducer and activator of transcription 3 OS=Homo sapiens OX=9606 GN=STAT3 PE=1 SV=2	NA	#CQITWAK	NA	1	NA	1.01	1.01	NA	NA
P11766	240	ADH5	ADH5_C240	ADHX_HUMAN Alcohol dehydrogenase class-3 OS=Homo sapiens OX=9606 GN=ADH5 PE=1 SV=4	NA	#CINPQDFSK	NA	1	NA	1.01	1.01	NA	NA
Q15392	499	DHCR24	DHCR24_C499	DHC24_HUMAN Delta(24)-sterol reductase OS=Homo sapiens OX=9606 GN=DHCR24 PE=1 SV=2	NA	#CQDAFPEVYDK	NA	2	NA	1.01	1.01	NA	NA
Q7L8L6	689	FASTKD5	FASTKD5_C689	FAKD5_HUMAN FAST kinase domain-containing protein 5, mitochondrial OS=Homo sapiens OX=9606 GN=FASTKD5 PE=1 SV=1	NA	#CMQTPR	NA	1	NA	1.01	1.01	NA	NA
P02545	522	LMNA	LMNA_C522	LMNA_HUMAN Prelamin-A/C OS=Homo sapiens OX=9606 GN=LMNA PE=1 SV=1	NA	#CGNSLR	NA	2	NA	1.01	1.01	NA	NA
Q96CV9	334	OPTN	OPTN_C334	OPTN_HUMAN Optineurin OS=Homo sapiens OX=9606 GN=OPTN PE=1 SV=3	NA	#CQALER	NA	1	NA	1.01	1.01	NA	NA
Q14980	1907	NUMA1	NUMA1_C1907	NUMA1_HUMAN Nuclear mitotic apparatus protein 1 OS=Homo sapiens OX=9606 GN=NUMA1 PE=1 SV=2	#CQDEPEQLDDWNR	#CQDEPEQLDDWNR	2	2	1.12	0.895	1.0075	0.159099	15.7915
P46782	66	RPS5	RPS5_C66	RS5_HUMAN 40S ribosomal protein S5 OS=Homo sapiens OX=9606 GN=RPS5 PE=1 SV=4	#CPIVER	#CPIVER	1	2	0.96	1.055	1.0075	0.0671751	6.66751
Q16401	64	PSMD5	PSMD5_C64	PSMD5_HUMAN 26S proteasome non-ATPase regulatory subunit 5 OS=Homo sapiens OX=9606 GN=PSMD5 PE=1 SV=3	#CVSILER	#CVSILER	2	2	0.92	1.09	1.005	0.120208	11.961
Q14847	29	LASP1	LASP1_C29	LASP1_HUMAN LIM and SH3 domain protein 1 OS=Homo sapiens OX=9606 GN=LASP1 PE=1 SV=2	#CFHCETCK	#CFHCETCK	3	1	1.03	0.98	1.005	0.0353553	3.51794
Q9BUK6	411	MSTO1	MSTO1_C411	MSTO1_HUMAN Protein misato homolog 1 OS=Homo sapiens OX=9606 GN=MSTO1 PE=1 SV=1	#CFAQSVVLR	#CFAQSVVLR	2	2	1	1.01	1.005	0.00707107	0.703589
O00154	36	ACOT7	ACOT7_C36	BACH_HUMAN Cytosolic acyl coenzyme A thioester hydrolase OS=Homo sapiens OX=9606 GN=ACOT7 PE=1 SV=3	#CAPVQVVGPR	#CAPVQVVGPR	1	2	0.99	1.02	1.005	0.0212132	2.11077
Q15181	274	PPA1	PPA1_C274	IPYR_HUMAN Inorganic pyrophosphatase OS=Homo sapiens OX=9606 GN=PPA1 PE=1 SV=2	#CTVPTDVDK	#CTVPTDVDK	1	3	1.02	0.98	1	0.0282843	2.82843
Q7Z5J4	239	RAI1	RAI1_C239	RAI1_HUMAN Retinoic acid-induced protein 1 OS=Homo sapiens OX=9606 GN=RAI1 PE=1 SV=2	#CTAPTAQPHDRPLTAS	NA	1	NA	1	NA	1	NA	NA
P82094	318	TMF1	TMF1_C318	TMF1_HUMAN TATA element modulatory factor OS=Homo sapiens OX=9606 GN=TMF1 PE=1 SV=2	#CSSDAFER	NA	1	NA	1	NA	1	NA	NA
Q8IWS0	87	PHF6	PHF6_C87	PHF6_HUMAN PHD finger protein 6 OS=Homo sapiens OX=9606 GN=PHF6 PE=1 SV=1	#CPGATIGCDVK	NA	1	NA	1	NA	1	NA	NA
Q9NRW3	130	APOBEC3C	APOBEC3C_C130	ABC3C_HUMAN DNA dC->dU-editing enzyme APOBEC-3C OS=Homo sapiens OX=9606 GN=APOBEC3C PE=1 SV=2	#CYQEGLR	NA	2	NA	1	NA	1	NA	NA
P38646	66	HSPA9	HSPA9_C66	GRP75_HUMAN Stress-70 protein, mitochondrial OS=Homo sapiens OX=9606 GN=HSPA9 PE=1 SV=2	#CVAVMEGK	#CVAVMEGK	1	2	1	1	1	0	0
Q92889	560	ERCC4	ERCC4_C560	XPF_HUMAN DNA repair endonuclease XPF OS=Homo sapiens OX=9606 GN=ERCC4 PE=1 SV=3	#CSDPYALTR	NA	2	NA	1	NA	1	NA	NA
Q14254	88	FLOT2	FLOT2_C88	FLOT2_HUMAN Flotillin-2 OS=Homo sapiens OX=9606 GN=FLOT2 PE=1 SV=2	#CEQFLGK	NA	1	NA	1	NA	1	NA	NA
Q99832	29	CCT7	CCT7_C29	TCPH_HUMAN T-complex protein 1 subunit eta OS=Homo sapiens OX=9606 GN=CCT7 PE=1 SV=2	#CQVIAEAVR	NA	2	NA	1	NA	1	NA	NA
Q96ME7	540	ZNF512	ZNF512_C540	ZN512_HUMAN Zinc finger protein 512 OS=Homo sapiens OX=9606 GN=ZNF512 PE=1 SV=2	#CKEPEQEPVPAQFQ	NA	2	NA	1	NA	1	NA	NA
Q5MJ70	63	SPDYA	SPDYA_C63	SPDYA_HUMAN Speedy protein A OS=Homo sapiens OX=9606 GN=SPDYA PE=1 SV=2	#CIVLQR	NA	1	NA	1	NA	1	NA	NA
Q15149	3336	PLEC	PLEC_C3336	PLEC_HUMAN Plectin OS=Homo sapiens OX=9606 GN=PLEC PE=1 SV=3	#CRPDQLTGL	#CRPDQLTGL	4	3	1	1	1	0	0
Q32MZ4	456	LRRFIP1	LRRFIP1_C456	LRRF1_HUMAN Leucine-rich repeat flightless-interacting protein 1 OS=Homo sapiens OX=9606 GN=LRRFIP1 PE=1 SV=2	#CMVEVPQELETSTGH	NA	2	NA	1	NA	1	NA	NA
P49790	777	NUP153	NUP153_C777	NU153_HUMAN Nuclear pore complex protein Nup153 OS=Homo sapiens OX=9606 GN=NUP153 PE=1 SV=2	#CTVTTGTLGFGDK	NA	2	NA	1	NA	1	NA	NA
Q9GZT4	269	SRR	SRR_C269	SRR_HUMAN Serine racemase OS=Homo sapiens OX=9606 GN=SRR PE=1 SV=1	#CATQLVWER	NA	1	NA	1	NA	1	NA	NA
Q15149	4071	PLEC	PLEC_C4071	PLEC_HUMAN Plectin OS=Homo sapiens OX=9606 GN=PLEC PE=1 SV=3	#CIAGVFVDATK	NA	2	NA	1	NA	1	NA	NA
Q86VU5	88	COMTD1	COMTD1_C88	CMTD1_HUMAN Catechol O-methyltransferase domain-containing protein 1 OS=Homo sapiens OX=9606 GN=COMTD1 PE=1 SV=1	#CEQAQLLANLAR	NA	1	NA	1	NA	1	NA	NA
P21333	478	FLNA	FLNA_C478	FLNA_HUMAN Filamin-A OS=Homo sapiens OX=9606 GN=FLNA PE=1 SV=4	#CNPSACR	#CNPSACR	1	2	1	1	1	0	0
Q86UP2	1105	KTN1	KTN1_C1105	KTN1_HUMAN Kinectin OS=Homo sapiens OX=9606 GN=KTN1 PE=1 SV=1	#CMAGTSGSEEVK	NA	2	NA	1	NA	1	NA	NA
Q8N7C3	70	TRIML2	TRIML2_C70	TRIMM_HUMAN Probable E3 ubiquitin-protein ligase TRIML2 OS=Homo sapiens OX=9606 GN=TRIML2 PE=1 SV=1	#CEQNLQR	NA	1	NA	1	NA	1	NA	NA
Q8IYD1	93	GSPT2	GSPT2_C93	ERF3B_HUMAN Eukaryotic peptide chain release factor GTP-binding subunit ERF3B OS=Homo sapiens OX=9606 GN=GSPT2 PE=1 SV=2	#CTGAGYPQGK	NA	2	NA	1	NA	1	NA	NA
Q14562	123	DHX8	DHX8_C123	DHX8_HUMAN ATP-dependent RNA helicase DHX8 OS=Homo sapiens OX=9606 GN=DHX8 PE=1 SV=1	#CQPDNPSVR	NA	1	NA	1	NA	1	NA	NA
Q14C86	789	GAPVD1	GAPVD1_C789	GAPD1_HUMAN GTPase-activating protein and VPS9 domain-containing protein 1 OS=Homo sapiens OX=9606 GN=GAPVD1 PE=1 SV=2	#CSSDFGGK	NA	2	NA	1	NA	1	NA	NA
Q86VP6	92	CAND1	CAND1_C92	CAND1_HUMAN Cullin-associated NEDD8-dissociated protein 1 OS=Homo sapiens OX=9606 GN=CAND1 PE=1 SV=2	NA	#CTNMLSDK	NA	3	NA	1	1	NA	NA
Q9Y3B3	151	TMED7	TMED7_C151	TMED7_HUMAN Transmembrane emp24 domain-containing protein 7 OS=Homo sapiens OX=9606 GN=TMED7 PE=1 SV=2	NA	#CVSIHEALK	NA	2	NA	1	1	NA	NA
Q9Y6E2	97	BZW2	BZW2_C97	BZW2_HUMAN Basic leucine zipper and W2 domain-containing protein 2 OS=Homo sapiens OX=9606 GN=BZW2 PE=1 SV=1	NA	#CVFSANEDHETIR	NA	2	NA	1	1	NA	NA
Q8IX01	970	SUGP2	SUGP2_C970	SUGP2_HUMAN SURP and G-patch domain-containing protein 2 OS=Homo sapiens OX=9606 GN=SUGP2 PE=1 SV=2	NA	#CILQEPK	NA	1	NA	1	1	NA	NA
P11021	41	HSPA5	HSPA5_C41	BIP_HUMAN Endoplasmic reticulum chaperone BiP OS=Homo sapiens OX=9606 GN=HSPA5 PE=1 SV=2	NA	#CVGVFK	NA	2	NA	1	1	NA	NA
Q6NTF9	304	RHBDD2	RHBDD2_C304	RHBD2_HUMAN Rhomboid domain-containing protein 2 OS=Homo sapiens OX=9606 GN=RHBDD2 PE=2 SV=2	NA	#CYVQNHFGPNPTSS	NA	1	NA	1	1	NA	NA
P48200	720	IREB2	IREB2_C720	IREB2_HUMAN Iron-responsive element-binding protein 2 OS=Homo sapiens OX=9606 GN=IREB2 PE=1 SV=4	NA	#CPSFFDK	NA	1	NA	1	1	NA	NA
P12955	58	PEPD	PEPD_C58	PEPD_HUMAN Xaa-Pro dipeptidase OS=Homo sapiens OX=9606 GN=PEPD PE=1 SV=3	NA	#CTDTGVLFR	NA	1	NA	1	1	NA	NA
O60488	564	ACSL4	ACSL4_C564	ACSL4_HUMAN Long-chain-fatty-acid--CoA ligase 4 OS=Homo sapiens OX=9606 GN=ACSL4 PE=1 SV=2	NA	#CLQIIDR	NA	1	NA	1	1	NA	NA
P37837	250	TALDO1	TALDO1_C250	TALDO_HUMAN Transaldolase OS=Homo sapiens OX=9606 GN=TALDO1 PE=1 SV=2	NA	#CDFLTISPK	NA	2	NA	1	1	NA	NA
Q9P2N5	49	RBM27	RBM27_C49	RBM27_HUMAN RNA-binding protein 27 OS=Homo sapiens OX=9606 GN=RBM27 PE=1 SV=2	NA	#CADQLDVFLQK	NA	2	NA	1	1	NA	NA
P28290	599	ITPRID2	ITPRID2_C599	ITPI2_HUMAN Protein ITPRID2 OS=Homo sapiens OX=9606 GN=ITPRID2 PE=1 SV=3	NA	#CNTIENTGTK	NA	2	NA	1	1	NA	NA
P49902	181	NT5C2	NT5C2_C181	5NTC_HUMAN Cytosolic purine 5'-nucleotidase OS=Homo sapiens OX=9606 GN=NT5C2 PE=1 SV=1	#CETGFK	#CETGFK	2	1	1.02	0.97	0.995	0.0353553	3.5533
Q9Y570	238	PPME1	PPME1_C238	PPME1_HUMAN Protein phosphatase methylesterase 1 OS=Homo sapiens OX=9606 GN=PPME1 PE=1 SV=3	#CEGITSPEGSK	#CEGITSPEGSK	2	2	0.98	1.01	0.995	0.0212132	2.13198
O94979	669	SEC31A	SEC31A_C669	SC31A_HUMAN Protein transport protein Sec31A OS=Homo sapiens OX=9606 GN=SEC31A PE=1 SV=3	#CDLLGTR	#CDLLGTR	1	2	1.01	0.97	0.99	0.0282843	2.857
P46940	45	IQGAP1	IQGAP1_C45	IQGA1_HUMAN Ras GTPase-activating-like protein IQGAP1 OS=Homo sapiens OX=9606 GN=IQGAP1 PE=1 SV=1	#CHLEEAKR	#CHLEEAKR	2	1	1	0.98	0.99	0.0141421	1.4285
O75386	151	TULP3	TULP3_C151	TULP3_HUMAN Tubby-related protein 3 OS=Homo sapiens OX=9606 GN=TULP3 PE=1 SV=2	#CLERPNSASSQ	NA	1	NA	0.99	NA	0.99	NA	NA
P11362	603	FGFR1	FGFR1_C603	FGFR1_HUMAN Fibroblast growth factor receptor 1 OS=Homo sapiens OX=9606 GN=FGFR1 PE=1 SV=3	#CAYQVAR	NA	1	NA	0.99	NA	0.99	NA	NA
Q8WW01	13	TSEN15	TSEN15_C13	SEN15_HUMAN tRNA-splicing endonuclease subunit Sen15 OS=Homo sapiens OX=9606 GN=TSEN15 PE=1 SV=1	#CSGLGPGGVR	NA	2	NA	0.99	NA	0.99	NA	NA
P49756	612	RBM25	RBM25_C612	RBM25_HUMAN RNA-binding protein 25 OS=Homo sapiens OX=9606 GN=RBM25 PE=1 SV=3	#CLKPTLR	NA	1	NA	0.99	NA	0.99	NA	NA
Q9H900	7	ZWILCH	ZWILCH_C7	ZWILC_HUMAN Protein zwilch homolog OS=Homo sapiens OX=9606 GN=ZWILCH PE=1 SV=2	#CAAEDFYSR	NA	2	NA	0.99	NA	0.99	NA	NA
Q27J81	745	INF2	INF2_C745	INF2_HUMAN Inverted formin-2 OS=Homo sapiens OX=9606 GN=INF2 PE=1 SV=2	#CESLLTSR	NA	1	NA	0.99	NA	0.99	NA	NA
Q92598	34	HSPH1	HSPH1_C34	HS105_HUMAN Heat shock protein 105 kDa OS=Homo sapiens OX=9606 GN=HSPH1 PE=1 SV=1	#CTPSVISFGSK	#CTPSVISFGSK	1	3	0.99	0.99	0.99	0	0
P42892	755	ECE1	ECE1_C755	ECE1_HUMAN Endothelin-converting enzyme 1 OS=Homo sapiens OX=9606 GN=ECE1 PE=1 SV=2	#CPPGSPMNPPHK	NA	1	NA	0.99	NA	0.99	NA	NA
Q9NQS1	326	AVEN	AVEN_C326	AVEN_HUMAN Cell death regulator Aven OS=Homo sapiens OX=9606 GN=AVEN PE=1 SV=1	#CAKPSVTEEK	NA	2	NA	0.99	NA	0.99	NA	NA
Q15262	216	PTPRK	PTPRK_C216	PTPRK_HUMAN Receptor-type tyrosine-protein phosphatase kappa OS=Homo sapiens OX=9606 GN=PTPRK PE=1 SV=2	#CIATGR	NA	1	NA	0.99	NA	0.99	NA	NA
Q9NYV4	862	CDK12	CDK12_C862	CDK12_HUMAN Cyclin-dependent kinase 12 OS=Homo sapiens OX=9606 GN=CDK12 PE=1 SV=2	#CSNILLNNSGQIK	#CSNILLNNSGQIK	2	2	0.98	1	0.99	0.0141421	1.4285
P07814	1487	EPRS	EPRS_C1487	SYEP_HUMAN Bifunctional glutamate/proline--tRNA ligase OS=Homo sapiens OX=9606 GN=EPRS PE=1 SV=5	#CELQPGAK	#CELQPGAK	2	1	0.98	1	0.99	0.0141421	1.4285
Q8NDX5	746	PHC3	PHC3_C746	PHC3_HUMAN Polyhomeotic-like protein 3 OS=Homo sapiens OX=9606 GN=PHC3 PE=1 SV=1	#CVQPELQNNTK	#CVQPELQNNTK	2	2	0.96	1.02	0.99	0.0424264	4.2855
Q9NPQ8	79	RIC8A	RIC8A_C79	RIC8A_HUMAN Synembryn-A OS=Homo sapiens OX=9606 GN=RIC8A PE=1 SV=3	#CLDPFTSR	#CLDPFTSR	1	2	0.87	1.11	0.99	0.169706	17.142
Q92973	153	TNPO1	TNPO1_C153	TNPO1_HUMAN Transportin-1 OS=Homo sapiens OX=9606 GN=TNPO1 PE=1 SV=2	NA	#CEGAFGALQK	NA	1	NA	0.99	0.99	NA	NA
Q9H4B0	390	OSGEPL1	OSGEPL1_C390	OSGP2_HUMAN Probable tRNA N6-adenosine threonylcarbamoyltransferase, mitochondrial OS=Homo sapiens OX=9606 GN=OSGEPL1 PE=2 SV=2	NA	#CPLGVDISK	NA	1	NA	0.99	0.99	NA	NA
Q9HCK8	832	CHD8	CHD8_C832	CHD8_HUMAN Chromodomain-helicase-DNA-binding protein 8 OS=Homo sapiens OX=9606 GN=CHD8 PE=1 SV=5	NA	#CILADEMGLGK	NA	1	NA	0.99	0.99	NA	NA
Q9Y296	195	TRAPPC4	TRAPPC4_C195	TPPC4_HUMAN Trafficking protein particle complex subunit 4 OS=Homo sapiens OX=9606 GN=TRAPPC4 PE=1 SV=1	NA	#CELFDQNLK	NA	1	NA	0.99	0.99	NA	NA
Q9BYP7	278	WNK3	WNK3_C278	WNK3_HUMAN Serine/threonine-protein kinase WNK3 OS=Homo sapiens OX=9606 GN=WNK3 PE=1 SV=3	NA	#CDNIFITGPTGSVK	NA	2	NA	0.99	0.99	NA	NA
Q9NR31	102	SAR1A	SAR1A_C102	SAR1A_HUMAN GTP-binding protein SAR1a OS=Homo sapiens OX=9606 GN=SAR1A PE=1 SV=1	NA	#CADHSR	NA	1	NA	0.99	0.99	NA	NA
P36941	418	LTBR	LTBR_C418	TNR3_HUMAN Tumor necrosis factor receptor superfamily member 3 OS=Homo sapiens OX=9606 GN=LTBR PE=1 SV=1	NA	#CGATPSNR	NA	2	NA	0.99	0.99	NA	NA
Q9UPN3	815	MACF1	MACF1_C815	MACF1_HUMAN Microtubule-actin cross-linking factor 1, isoforms 1/2/3/5 OS=Homo sapiens OX=9606 GN=MACF1 PE=1 SV=4	NA	#CDHNTSLSR	NA	3	NA	0.99	0.99	NA	NA
O60343	316	TBC1D4	TBC1D4_C316	TBCD4_HUMAN TBC1 domain family member 4 OS=Homo sapiens OX=9606 GN=TBC1D4 PE=1 SV=2	NA	#CSSVTGVQR	NA	1	NA	0.99	0.99	NA	NA
Q96N66	372	MBOAT7	MBOAT7_C372	MBOA7_HUMAN Lysophospholipid acyltransferase 7 OS=Homo sapiens OX=9606 GN=MBOAT7 PE=1 SV=2	NA	#CLAAEGR	NA	1	NA	0.99	0.99	NA	NA
P29323	375	EPHB2	EPHB2_C375	EPHB2_HUMAN Ephrin type-B receptor 2 OS=Homo sapiens OX=9606 GN=EPHB2 PE=1 SV=5	NA	#CGDNVQYAPR	NA	1	NA	0.99	0.99	NA	NA
Q9Y5K6	595	CD2AP	CD2AP_C595	CD2AP_HUMAN CD2-associated protein OS=Homo sapiens OX=9606 GN=CD2AP PE=1 SV=1	#CIVEALK	#CIVEALK	2	1	0.995	0.98	0.9875	0.0106066	1.07409
P40763	108	STAT3	STAT3_C108	STAT3_HUMAN Signal transducer and activator of transcription 3 OS=Homo sapiens OX=9606 GN=STAT3 PE=1 SV=2	#CLWEESR	#CLWEESR	3	1	0.92	1.05	0.985	0.0919239	9.33237
Q8WUM4	524	PDCD6IP	PDCD6IP_C524	PDC6I_HUMAN Programmed cell death 6-interacting protein OS=Homo sapiens OX=9606 GN=PDCD6IP PE=1 SV=1	#CKPEPELNAAIPSANPAK	#CKPEPELNAAIPSANPAK	1	4	0.9	1.07	0.985	0.120208	12.2039
P82932	105	MRPS6	MRPS6_C105	RT06_HUMAN 28S ribosomal protein S6, mitochondrial OS=Homo sapiens OX=9606 GN=MRPS6 PE=1 SV=3	#CEGIVPVPLAEK	#CEGIVPVPLAEK	3	1	0.9	1.07	0.985	0.120208	12.2039
Q16630	476	CPSF6	CPSF6_C476	CPSF6_HUMAN Cleavage and polyadenylation specificity factor subunit 6 OS=Homo sapiens OX=9606 GN=CPSF6 PE=1 SV=2	#CLHGIESK	#CLHGIESK	1	1	0.68	1.29	0.985	0.431335	43.7904
Q09666	5502	AHNAK	AHNAK_C5502	AHNK_HUMAN Neuroblast differentiation-associated protein AHNAK OS=Homo sapiens OX=9606 GN=AHNAK PE=1 SV=2	#CDVNLPGVNVK	#CDVNLPGVNVK	3	3	1	0.97	0.985	0.0212132	2.15362
Q13501	113	SQSTM1	SQSTM1_C113	SQSTM_HUMAN Sequestosome-1 OS=Homo sapiens OX=9606 GN=SQSTM1 PE=1 SV=1	#CAQEAPR	#CAQEAPR	2	3	1	0.97	0.985	0.0212132	2.15362
Q7Z4F1	331	LRP10	LRP10_C331	LRP10_HUMAN Low-density lipoprotein receptor-related protein 10 OS=Homo sapiens OX=9606 GN=LRP10 PE=1 SV=2	#CYSEAQR	NA	2	NA	0.985	NA	0.985	NA	NA
Q14137	404	BOP1	BOP1_C404	BOP1_HUMAN Ribosome biogenesis protein BOP1 OS=Homo sapiens OX=9606 GN=BOP1 PE=1 SV=2	#CQALVYR	#CQALVYR	2	2	0.98	0.99	0.985	0.00707107	0.717875
P78527	3420	PRKDC	PRKDC_C3420	PRKDC_HUMAN DNA-dependent protein kinase catalytic subunit OS=Homo sapiens OX=9606 GN=PRKDC PE=1 SV=3	#CDQQLR	#CDQQLR	2	2	0.97	1	0.985	0.0212132	2.15362
O75369	706	FLNB	FLNB_C706	FLNB_HUMAN Filamin-B OS=Homo sapiens OX=9606 GN=FLNB PE=1 SV=2	#CSYTPVK	#CSYTPVK	1	2	0.96	1.01	0.985	0.0353553	3.58937
P51808	8	DYNLT3	DYNLT3_C8	DYLT3_HUMAN Dynein light chain Tctex-type 3 OS=Homo sapiens OX=9606 GN=DYNLT3 PE=1 SV=1	#CDEVGFNAEEAHNIVK	#CDEVGFNAEEAHNIVK	1	1	0.94	1.03	0.985	0.0636396	6.46087
Q9ULA0	327	DNPEP	DNPEP_C327	DNPEP_HUMAN Aspartyl aminopeptidase OS=Homo sapiens OX=9606 GN=DNPEP PE=1 SV=1	#CQHPTAF #CQHPTAFEEAIPK	#CQHPTAF #CQHPTAFEEAIPK	3	6	1.01	0.955	0.9825	0.0388909	3.95836
O75643	428	SNRNP200	SNRNP200_C428	U520_HUMAN U5 small nuclear ribonucleoprotein 200 kDa helicase OS=Homo sapiens OX=9606 GN=SNRNP200 PE=1 SV=2	#CQLPDGSFR	#CQLPDGSFR	1	2	1.32	0.64	0.98	0.480833	49.0646
P39023	253	RPL3	RPL3_C253	RL3_HUMAN 60S ribosomal protein L3 OS=Homo sapiens OX=9606 GN=RPL3 PE=1 SV=2	#CIGAWHPAR	#CIGAWHPAR #CIGAWHPA	3	4	1.05	0.91	0.98	0.0989949	10.1015
Q96FJ0	38	STAMBPL1	STAMBPL1_C38	STALP_HUMAN AMSH-like protease OS=Homo sapiens OX=9606 GN=STAMBPL1 PE=1 SV=2	#CNITISEDITPR	#CNITISEDITPR	2	1	1.03	0.93	0.98	0.0707107	7.21538
Q96T17	278	MAP7D2	MAP7D2_C278	MA7D2_HUMAN MAP7 domain-containing protein 2 OS=Homo sapiens OX=9606 GN=MAP7D2 PE=1 SV=2	#CEFSGGIPK	#CEFSGGIPK	2	3	1.01	0.95	0.98	0.0424264	4.32923
O95757	38	HSPA4L	HSPA4L_C38	HS74L_HUMAN Heat shock 70 kDa protein 4L OS=Homo sapiens OX=9606 GN=HSPA4L PE=1 SV=3	#CISLGSR	NA	1	NA	0.98	NA	0.98	NA	NA
Q9NQW6	309	ANLN	ANLN_C309	ANLN_HUMAN Anillin OS=Homo sapiens OX=9606 GN=ANLN PE=1 SV=2	#CEGQNPELLPK	#CEGQNPELLPK	1	1	0.98	0.98	0.98	0	0
P21333	2601	FLNA	FLNA_C2601	FLNA_HUMAN Filamin-A OS=Homo sapiens OX=9606 GN=FLNA PE=1 SV=4	#CEEILVK	NA	1	NA	0.98	NA	0.98	NA	NA
Q9BW83	8	IFT27	IFT27_C8	IFT27_HUMAN Intraflagellar transport protein 27 homolog OS=Homo sapiens OX=9606 GN=IFT27 PE=1 SV=1	#CILAGDPAVGK	NA	1	NA	0.98	NA	0.98	NA	NA
P30566	27	ADSL	ADSL_C27	PUR8_HUMAN Adenylosuccinate lyase OS=Homo sapiens OX=9606 GN=ADSL PE=1 SV=2	#CFVFSDR	NA	1	NA	0.98	NA	0.98	NA	NA
Q99873	33	PRMT1	PRMT1_C33	ANM1_HUMAN Protein arginine N-methyltransferase 1 OS=Homo sapiens OX=9606 GN=PRMT1 PE=1 SV=3	#CGQAESSEKPNAEDMTSK	NA	3	NA	0.98	NA	0.98	NA	NA
Q9P0V9	22	SEPTIN10	SEPTIN10_C22	SEP10_HUMAN Septin-10 OS=Homo sapiens OX=9606 GN=SEPTIN10 PE=1 SV=2	#CMSSQGSDDEQIKR	NA	1	NA	0.98	NA	0.98	NA	NA
P52948	1347	NUP98	NUP98_C1347	NUP98_HUMAN Nuclear pore complex protein Nup98-Nup96 OS=Homo sapiens OX=9606 GN=NUP98 PE=1 SV=4	#CSLAQQSGDHR	NA	1	NA	0.98	NA	0.98	NA	NA
Q96T76	286	MMS19	MMS19_C286	MMS19_HUMAN MMS19 nucleotide excision repair protein homolog OS=Homo sapiens OX=9606 GN=MMS19 PE=1 SV=2	#CAVYGQK	NA	1	NA	0.98	NA	0.98	NA	NA
Q5JRA6	1486	MIA3	MIA3_C1486	TGO1_HUMAN Transport and Golgi organization protein 1 homolog OS=Homo sapiens OX=9606 GN=MIA3 PE=1 SV=1	NA	#CNLEDQVK	NA	1	NA	0.98	0.98	NA	NA
Q5M775	470	SPECC1	SPECC1_C470	CYTSB_HUMAN Cytospin-B OS=Homo sapiens OX=9606 GN=SPECC1 PE=1 SV=1	NA	#CTGILEQGR	NA	2	NA	0.98	0.98	NA	NA
P46821	73	MAP1B	MAP1B_C73	MAP1B_HUMAN Microtubule-associated protein 1B OS=Homo sapiens OX=9606 GN=MAP1B PE=1 SV=2	NA	#CNLDQELK	NA	2	NA	0.98	0.98	NA	NA
O15371	19	EIF3D	EIF3D_C19	EIF3D_HUMAN Eukaryotic translation initiation factor 3 subunit D OS=Homo sapiens OX=9606 GN=EIF3D PE=1 SV=1	NA	#CAVPEQFR	NA	1	NA	0.98	0.98	NA	NA
P16615	318	ATP2A2	ATP2A2_C318	AT2A2_HUMAN Sarcoplasmic/endoplasmic reticulum calcium ATPase 2 OS=Homo sapiens OX=9606 GN=ATP2A2 PE=1 SV=1	NA	#CLALGTR	NA	1	NA	0.98	0.98	NA	NA
Q16666	737	IFI16	IFI16_C737	IF16_HUMAN Gamma-interferon-inducible protein 16 OS=Homo sapiens OX=9606 GN=IFI16 PE=1 SV=3	NA	#CFELAPK	NA	1	NA	0.98	0.98	NA	NA
Q15633	263	TARBP2	TARBP2_C263	TRBP2_HUMAN RISC-loading complex subunit TARBP2 OS=Homo sapiens OX=9606 GN=TARBP2 PE=1 SV=3	NA	#CTWDSLR	NA	1	NA	0.98	0.98	NA	NA
A4D0V7	687	CPED1	CPED1_C687	CPED1_HUMAN Cadherin-like and PC-esterase domain-containing protein 1 OS=Homo sapiens OX=9606 GN=CPED1 PE=2 SV=1	NA	#CGLLIHP	NA	1	NA	0.98	0.98	NA	NA
P49756	644	RBM25	RBM25_C644	RBM25_HUMAN RNA-binding protein 25 OS=Homo sapiens OX=9606 GN=RBM25 PE=1 SV=3	NA	#CGIIIPH	NA	1	NA	0.98	0.98	NA	NA
Q14669	332	TRIP12	TRIP12_C332	TRIPC_HUMAN E3 ubiquitin-protein ligase TRIP12 OS=Homo sapiens OX=9606 GN=TRIP12 PE=1 SV=1	NA	#CASTSR	NA	2	NA	0.98	0.98	NA	NA
P55010	59	EIF5	EIF5_C59	IF5_HUMAN Eukaryotic translation initiation factor 5 OS=Homo sapiens OX=9606 GN=EIF5 PE=1 SV=2	#CELGAQTQFDVK	#CELGAQTQFDVK	2	2	0.995	0.96	0.9775	0.0247487	2.53184
Q8N8Q9	340	NIPA2	NIPA2_C340	NIPA2_HUMAN Magnesium transporter NIPA2 OS=Homo sapiens OX=9606 GN=NIPA2 PE=2 SV=1	#CGIEQHTGENVSR	#CGIEQHTGENVSR	5	2	1.02	0.93	0.975	0.0636396	6.52714
P30498	283	HLA-B	HLA-B_C283	1B78_HUMAN HLA class I histocompatibility antigen, B-78 alpha chain OS=Homo sapiens OX=9606 GN=HLA-B PE=1 SV=1	#CHVQHEGLPK	NA	2	NA	0.975	NA	0.975	NA	NA
P09496	218	CLTA	CLTA_C218	CLCA_HUMAN Clathrin light chain A OS=Homo sapiens OX=9606 GN=CLTA PE=1 SV=1	#CDFNPK	#CDFNPK	3	2	0.97	0.98	0.975	0.00707107	0.725238
P23526	421	AHCY	AHCY_C421	SAHH_HUMAN Adenosylhomocysteinase OS=Homo sapiens OX=9606 GN=AHCY PE=1 SV=4	#CDGPFKPDHYR #CDGPFKPD	#CDGPFKPDHYR	9	9	0.96	0.99	0.975	0.0212132	2.17571
O60927	62	PPP1R11	PPP1R11_C62	PP1RB_HUMAN E3 ubiquitin-protein ligase PPP1R11 OS=Homo sapiens OX=9606 GN=PPP1R11 PE=1 SV=1	#CIYEKPR	#CIYEKPR	3	2	0.96	0.99	0.975	0.0212132	2.17571
Q92466	364	DDB2	DDB2_C364	DDB2_HUMAN DNA damage-binding protein 2 OS=Homo sapiens OX=9606 GN=DDB2 PE=1 SV=1	NA	#CTPYELR	NA	2	NA	0.975	0.975	NA	NA
O75369	991	FLNB	FLNB_C991	FLNB_HUMAN Filamin-B OS=Homo sapiens OX=9606 GN=FLNB PE=1 SV=2	#CLVTPVTGR	#CLVTPVTGR	1	1	0.98	0.96	0.97	0.0141421	1.45795
Q7Z7F0	280	KHDC4	KHDC4_C280	KHDC4_HUMAN KH homology domain-containing protein 4 OS=Homo sapiens OX=9606 GN=KHDC4 PE=1 SV=1	#CIEPASGR	NA	1	NA	0.97	NA	0.97	NA	NA
Q7L2J0	153	MEPCE	MEPCE_C153	MEPCE_HUMAN 7SK snRNA methylphosphate capping enzyme OS=Homo sapiens OX=9606 GN=MEPCE PE=1 SV=1	#CNVGGGGGGFK	NA	2	NA	0.97	NA	0.97	NA	NA
P50416	304	CPT1A	CPT1A_C304	CPT1A_HUMAN Carnitine O-palmitoyltransferase 1, liver isoform OS=Homo sapiens OX=9606 GN=CPT1A PE=1 SV=2	#CSAQWER	NA	2	NA	0.97	NA	0.97	NA	NA
P08670	328	VIM	VIM_C328	VIME_HUMAN Vimentin OS=Homo sapiens OX=9606 GN=VIM PE=1 SV=4	#CEVDALK	NA	2	NA	0.97	NA	0.97	NA	NA
P54578	277	USP14	USP14_C277	UBP14_HUMAN Ubiquitin carboxyl-terminal hydrolase 14 OS=Homo sapiens OX=9606 GN=USP14 PE=1 SV=3	#CFINQEVK	NA	2	NA	0.97	NA	0.97	NA	NA
Q9Y4C2	335	TCAF1	TCAF1_C335	TCAF1_HUMAN TRPM8 channel-associated factor 1 OS=Homo sapiens OX=9606 GN=TCAF1 PE=1 SV=3	#CFEPVSEVGVK	NA	1	NA	0.97	NA	0.97	NA	NA
Q8WUD1	154	RAB2B	RAB2B_C154	RAB2B_HUMAN Ras-related protein Rab-2B OS=Homo sapiens OX=9606 GN=RAB2B PE=1 SV=1	#CNVEEAFINTAK	NA	1	NA	0.97	NA	0.97	NA	NA
Q02241	483	KIF23	KIF23_C483	KIF23_HUMAN Kinesin-like protein KIF23 OS=Homo sapiens OX=9606 GN=KIF23 PE=1 SV=3	#CEILDINDEQTLPR	NA	1	NA	0.97	NA	0.97	NA	NA
Q9NYZ3	324	GTSE1	GTSE1_C324	GTSE1_HUMAN G2 and S phase-expressed protein 1 OS=Homo sapiens OX=9606 GN=GTSE1 PE=1 SV=3	#CTSPAVGK	NA	1	NA	0.97	NA	0.97	NA	NA
Q14203	636	DCTN1	DCTN1_C636	DCTN1_HUMAN Dynactin subunit 1 OS=Homo sapiens OX=9606 GN=DCTN1 PE=1 SV=3	#CSERPGLR	NA	1	NA	0.97	NA	0.97	NA	NA
Q14344	18	GNA13	GNA13_C18	GNA13_HUMAN Guanine nucleotide-binding protein subunit alpha-13 OS=Homo sapiens OX=9606 GN=GNA13 PE=1 SV=2	#CLLTSGEAEQQR	#CLLTSGEAEQQR	1	2	0.93	1.01	0.97	0.0565685	5.83181
Q9H6U6	16	BCAS3	BCAS3_C16	BCAS3_HUMAN Breast carcinoma-amplified sequence 3 OS=Homo sapiens OX=9606 GN=BCAS3 PE=1 SV=3	NA	#CTGGVVVRPQ	NA	1	NA	0.97	0.97	NA	NA
Q9H0U9	160	TSPYL1	TSPYL1_C160	TSYL1_HUMAN Testis-specific Y-encoded-like protein 1 OS=Homo sapiens OX=9606 GN=TSPYL1 PE=1 SV=3	NA	#CATVSAAVAER	NA	1	NA	0.97	0.97	NA	NA
P11142	603	HSPA8	HSPA8_C603	HSP7C_HUMAN Heat shock cognate 71 kDa protein OS=Homo sapiens OX=9606 GN=HSPA8 PE=1 SV=1	NA	#CNPIITK	NA	1	NA	0.97	0.97	NA	NA
Q9UEW8	99	STK39	STK39_C99	STK39_HUMAN STE20/SPS1-related proline-alanine-rich protein kinase OS=Homo sapiens OX=9606 GN=STK39 PE=1 SV=3	NA	#CQTSMDELLK	NA	1	NA	0.97	0.97	NA	NA
O60231	37	DHX16	DHX16_C37	DHX16_HUMAN Pre-mRNA-splicing factor ATP-dependent RNA helicase DHX16 OS=Homo sapiens OX=9606 GN=DHX16 PE=1 SV=2	NA	#CTSAEEFVQR	NA	2	NA	0.97	0.97	NA	NA
Q9NUQ6	339	SPATS2L	SPATS2L_C339	SPS2L_HUMAN SPATS2-like protein OS=Homo sapiens OX=9606 GN=SPATS2L PE=1 SV=2	NA	#CDIEQLK	NA	1	NA	0.97	0.97	NA	NA
Q12824	167	SMARCB1	SMARCB1_C167	SNF5_HUMAN SWI/SNF-related matrix-associated actin-dependent regulator of chromatin subfamily B member 1 OS=Homo sapiens OX=9606 GN=SMARCB1 PE=1 SV=2	NA	#CFDDHDPAVIHEN #CFDDHDPAVIH	NA	2	NA	0.97	0.97	NA	NA
Q6P3W7	496	SCYL2	SCYL2_C496	SCYL2_HUMAN SCY1-like protein 2 OS=Homo sapiens OX=9606 GN=SCYL2 PE=1 SV=1	NA	#CLQTSSLAVR	NA	2	NA	0.97	0.97	NA	NA
Q8NCG7	465	DAGLB	DAGLB_C465	DGLB_HUMAN Sn1-specific diacylglycerol lipase beta OS=Homo sapiens OX=9606 GN=DAGLB PE=1 SV=2	NA	#CYAFSPPR	NA	3	NA	0.97	0.97	NA	NA
Q9NVH0	284	EXD2	EXD2_C284	EXD2_HUMAN Exonuclease 3'-5' domain-containing protein 2 OS=Homo sapiens OX=9606 GN=EXD2 PE=1 SV=2	NA	#CQGVVDIPFR	NA	1	NA	0.97	0.97	NA	NA
P23526	278	AHCY	AHCY_C278	SAHH_HUMAN Adenosylhomocysteinase OS=Homo sapiens OX=9606 GN=AHCY PE=1 SV=4	NA	#CIDIILGR	NA	1	NA	0.97	0.97	NA	NA
P43034	168	PAFAH1B1	PAFAH1B1_C168	LIS1_HUMAN Platelet-activating factor acetylhydrolase IB subunit alpha OS=Homo sapiens OX=9606 GN=PAFAH1B1 PE=1 SV=2	#CSADMTIK	#CSADMTIK	4	2	0.885	1.05	0.9675	0.116673	12.0592
Q96N66	280	MBOAT7	MBOAT7_C280	MBOA7_HUMAN Lysophospholipid acyltransferase 7 OS=Homo sapiens OX=9606 GN=MBOAT7 PE=1 SV=2	#CPPPSSPEK	#CPPPSSPEK	2	1	1.1	0.83	0.965	0.190919	19.7843
Q96RL1	257	UIMC1	UIMC1_C257	UIMC1_HUMAN BRCA1-A complex subunit RAP80 OS=Homo sapiens OX=9606 GN=UIMC1 PE=1 SV=2	#CLPTLADAK	#CLPTLADAK	1	2	0.58	1.35	0.965	0.544472	56.422
P52895	145	AKR1C2	AKR1C2_C145	AK1C2_HUMAN Aldo-keto reductase family 1 member C2 OS=Homo sapiens OX=9606 GN=AKR1C2 PE=1 SV=3	#CATWEAMEK	#CATWEAMEK	5	2	0.97	0.96	0.965	0.00707107	0.732753
Q92783	336	STAM	STAM_C336	STAM1_HUMAN Signal transducing adapter molecule 1 OS=Homo sapiens OX=9606 GN=STAM PE=1 SV=3	#CHQMGPLIDEK	NA	4	NA	0.965	NA	0.965	NA	NA
P16615	404	ATP2A2	ATP2A2_C404	AT2A2_HUMAN Sarcoplasmic/endoplasmic reticulum calcium ATPase 2 OS=Homo sapiens OX=9606 GN=ATP2A2 PE=1 SV=1	#CHQYDGL #CHQYDGLVELA	#CHQYDGLVELA	2	1	1.17	0.75	0.96	0.296985	30.9359
Q14247	246	CTTN	CTTN_C246	SRC8_HUMAN Src substrate cortactin OS=Homo sapiens OX=9606 GN=CTTN PE=1 SV=2	#CALGWDHQEK	#CALGWDHQEK	3	4	0.97	0.95	0.96	0.0141421	1.47314
O15438	703	ABCC3	ABCC3_C703	MRP3_HUMAN Canalicular multispecific organic anion transporter 2 OS=Homo sapiens OX=9606 GN=ABCC3 PE=1 SV=3	#CTLQENVLFGK	#CTLQENVLFGK	2	1	0.97	0.95	0.96	0.0141421	1.47314
Q9UPN9	582	TRIM33	TRIM33_C582	TRI33_HUMAN E3 ubiquitin-protein ligase TRIM33 OS=Homo sapiens OX=9606 GN=TRIM33 PE=1 SV=3	#CGAFQAH	NA	2	NA	0.96	NA	0.96	NA	NA
P54578	359	USP14	USP14_C359	UBP14_HUMAN Ubiquitin carboxyl-terminal hydrolase 14 OS=Homo sapiens OX=9606 GN=USP14 PE=1 SV=3	#CTPELQEK	NA	1	NA	0.96	NA	0.96	NA	NA
O94979	173	SEC31A	SEC31A_C173	SC31A_HUMAN Protein transport protein Sec31A OS=Homo sapiens OX=9606 GN=SEC31A PE=1 SV=3	#CIAWNR	NA	1	NA	0.96	NA	0.96	NA	NA
P52756	766	RBM5	RBM5_C766	RBM5_HUMAN RNA-binding protein 5 OS=Homo sapiens OX=9606 GN=RBM5 PE=1 SV=2	#CQGITAPIEAQVR	NA	1	NA	0.96	NA	0.96	NA	NA
Q9H0D6	159	XRN2	XRN2_C159	XRN2_HUMAN 5'-3' exoribonuclease 2 OS=Homo sapiens OX=9606 GN=XRN2 PE=1 SV=1	#CITPGTEFMDNLAK	NA	2	NA	0.96	NA	0.96	NA	NA
Q9BUR5	78	APOO	APOO_C78	MIC26_HUMAN MICOS complex subunit MIC26 OS=Homo sapiens OX=9606 GN=APOO PE=1 SV=1	#CQETYSQTKPK	#CQETYSQTKPK	2	4	0.96	0.96	0.96	0	0
Q9Y320	46	TMX2	TMX2_C46	TMX2_HUMAN Thioredoxin-related transmembrane protein 2 OS=Homo sapiens OX=9606 GN=TMX2 PE=1 SV=1	#CHGLPTQR	NA	1	NA	0.96	NA	0.96	NA	NA
P41252	185	IARS	IARS_C185	SYIC_HUMAN Isoleucine--tRNA ligase, cytoplasmic OS=Homo sapiens OX=9606 GN=IARS PE=1 SV=2	#CNTPLSNFESHQNYK	#CNTPLSNFESHQNYK #CNTPLSNFESH	1	7	0.9	1.02	0.96	0.0848528	8.83883
Q9BQA1	247	WDR77	WDR77_C247	MEP50_HUMAN Methylosome protein 50 OS=Homo sapiens OX=9606 GN=WDR77 PE=1 SV=1	NA	#CVLSSAVHSQ	NA	2	NA	0.96	0.96	NA	NA
Q8WZA9	504	IRGQ	IRGQ_C504	IRGQ_HUMAN Immunity-related GTPase family Q protein OS=Homo sapiens OX=9606 GN=IRGQ PE=1 SV=1	NA	#CDVALLR	NA	2	NA	0.96	0.96	NA	NA
Q9Y6E0	394	STK24	STK24_C394	STK24_HUMAN Serine/threonine-protein kinase 24 OS=Homo sapiens OX=9606 GN=STK24 PE=1 SV=1	NA	#CGGNLGSIEELR	NA	1	NA	0.96	0.96	NA	NA
Q9HBI6	402	CYP4F11	CYP4F11_C402	CP4FB_HUMAN Cytochrome P450 4F11 OS=Homo sapiens OX=9606 GN=CYP4F11 PE=1 SV=3	NA	#CTQDFVLPDGR	NA	2	NA	0.96	0.96	NA	NA
Q8NDX6	50	ZNF740	ZNF740_C50	ZN740_HUMAN Zinc finger protein 740 OS=Homo sapiens OX=9606 GN=ZNF740 PE=1 SV=1	NA	#CSSQGHR	NA	2	NA	0.96	0.96	NA	NA
Q9H6Y7	256	RNF167	RNF167_C256	RN167_HUMAN E3 ubiquitin-protein ligase RNF167 OS=Homo sapiens OX=9606 GN=RNF167 PE=1 SV=1	NA	#CVDPWLTQTR	NA	1	NA	0.96	0.96	NA	NA
O95714	1364	HERC2	HERC2_C1364	HERC2_HUMAN E3 ubiquitin-protein ligase HERC2 OS=Homo sapiens OX=9606 GN=HERC2 PE=1 SV=2	NA	#CSSPGGTPASK	NA	1	NA	0.96	0.96	NA	NA
Q13501	131	SQSTM1	SQSTM1_C131	SQSTM_HUMAN Sequestosome-1 OS=Homo sapiens OX=9606 GN=SQSTM1 PE=1 SV=1	NA	#CNGPVVGTR	NA	2	NA	0.96	0.96	NA	NA
Q9H814	87	PHAX	PHAX_C87	PHAX_HUMAN Phosphorylated adapter RNA export protein OS=Homo sapiens OX=9606 GN=PHAX PE=1 SV=1	#CFNPPPKPEPF	#CFNPPPKPEPF	1	4	1.09	0.825	0.9575	0.187383	19.5701
Q9UHR4	229	BAIAP2L1	BAIAP2L1_C229	BI2L1_HUMAN Brain-specific angiogenesis inhibitor 1-associated protein 2-like protein 1 OS=Homo sapiens OX=9606 GN=BAIAP2L1 PE=1 SV=2	#CVDAIK	#CVDAIK	1	1	0.98	0.93	0.955	0.0353553	3.70213
Q9P0L0	60	VAPA	VAPA_C60	VAPA_HUMAN Vesicle-associated membrane protein-associated protein A OS=Homo sapiens OX=9606 GN=VAPA PE=1 SV=3	#CVRPNSGIIDPGSTVTVS	#CVRPNSGIIDPGSTVTVS	1	1	0.85	1.06	0.955	0.148492	15.5489
P21333	2476	FLNA	FLNA_C2476	FLNA_HUMAN Filamin-A OS=Homo sapiens OX=9606 GN=FLNA PE=1 SV=4	#CQECPEGYR	NA	2	NA	0.955	NA	0.955	NA	NA
Q2NL82	753	TSR1	TSR1_C753	TSR1_HUMAN Pre-rRNA-processing protein TSR1 homolog OS=Homo sapiens OX=9606 GN=TSR1 PE=1 SV=1	#CSFDGK	#CSFDGK	1	1	0.94	0.97	0.955	0.0212132	2.22128
O00566	14	MPHOSPH10	MPHOSPH10_C14	MPP10_HUMAN U3 small nucleolar ribonucleoprotein protein MPP10 OS=Homo sapiens OX=9606 GN=MPHOSPH10 PE=1 SV=2	#CLTEVGK	#CLTEVGK	2	1	1.085	0.82	0.9525	0.187383	19.6728
O60292	832	SIPA1L3	SIPA1L3_C832	SI1L3_HUMAN Signal-induced proliferation-associated 1-like protein 3 OS=Homo sapiens OX=9606 GN=SIPA1L3 PE=1 SV=3	#CVSNTPIDSTGK	#CVSNTPIDSTGK	1	1	1.17	0.73	0.95	0.311127	32.7502
Q53GQ0	215	HSD17B12	HSD17B12_C215	DHB12_HUMAN Very-long-chain 3-oxoacyl-CoA reductase OS=Homo sapiens OX=9606 GN=HSD17B12 PE=1 SV=2	#CLHEEYR	#CLHEEYR	1	1	1.03	0.87	0.95	0.113137	11.9092
O15344	580	MID1	MID1_C580	TRI18_HUMAN E3 ubiquitin-protein ligase Midline-1 OS=Homo sapiens OX=9606 GN=MID1 PE=1 SV=1	#CNNNWVVR	#CNNNWVVR	2	2	1.02	0.88	0.95	0.0989949	10.4205
Q9H553	59	ALG2	ALG2_C59	ALG2_HUMAN Alpha-1,3/1,6-mannosyltransferase ALG2 OS=Homo sapiens OX=9606 GN=ALG2 PE=1 SV=1	#CFAESR	NA	1	NA	0.95	NA	0.95	NA	NA
P46776	70	RPL27A	RPL27A_C70	RL27A_HUMAN 60S ribosomal protein L27a OS=Homo sapiens OX=9606 GN=RPL27A PE=1 SV=2	#CPTVNLDK	#CPTVNLDK	2	5	0.95	0.95	0.95	0	0
P34932	417	HSPA4	HSPA4_C417	HSP74_HUMAN Heat shock 70 kDa protein 4 OS=Homo sapiens OX=9606 GN=HSPA4 PE=1 SV=4	#CEVFSK	NA	3	NA	0.95	NA	0.95	NA	NA
Q9Y490	575	TLN1	TLN1_C575	TLN1_HUMAN Talin-1 OS=Homo sapiens OX=9606 GN=TLN1 PE=1 SV=3	#CAVTTISSNLTEMSR	#CAVTTISSNLTEMSR	5	2	0.95	0.95	0.95	0	0
O75533	1035	SF3B1	SF3B1_C1035	SF3B1_HUMAN Splicing factor 3B subunit 1 OS=Homo sapiens OX=9606 GN=SF3B1 PE=1 SV=3	#CIDLVGR	NA	3	NA	0.95	NA	0.95	NA	NA
Q1KMD3	408	HNRNPUL2	HNRNPUL2_C408	HNRL2_HUMAN Heterogeneous nuclear ribonucleoprotein U-like protein 2 OS=Homo sapiens OX=9606 GN=HNRNPUL2 PE=1 SV=1	#CVVELNFGQK	NA	1	NA	0.95	NA	0.95	NA	NA
O60216	392	RAD21	RAD21_C392	RAD21_HUMAN Double-strand-break repair protein rad21 homolog OS=Homo sapiens OX=9606 GN=RAD21 PE=1 SV=2	#CLTPLVPEDLR	NA	1	NA	0.95	NA	0.95	NA	NA
O75694	974	NUP155	NUP155_C974	NU155_HUMAN Nuclear pore complex protein Nup155 OS=Homo sapiens OX=9606 GN=NUP155 PE=1 SV=1	#CITDTLQELVNQSK	NA	2	NA	0.95	NA	0.95	NA	NA
P31930	380	UQCRC1	UQCRC1_C380	QCR1_HUMAN Cytochrome b-c1 complex subunit 1, mitochondrial OS=Homo sapiens OX=9606 GN=UQCRC1 PE=1 SV=3	#CTSATESEVAR	NA	1	NA	0.95	NA	0.95	NA	NA
Q96PD2	725	DCBLD2	DCBLD2_C725	DCBD2_HUMAN Discoidin, CUB and LCCL domain-containing protein 2 OS=Homo sapiens OX=9606 GN=DCBLD2 PE=1 SV=1	#CSSAQAQYDTPK	NA	2	NA	0.95	NA	0.95	NA	NA
Q7Z2W4	272	ZC3HAV1	ZC3HAV1_C272	ZCCHV_HUMAN Zinc finger CCCH-type antiviral protein 1 OS=Homo sapiens OX=9606 GN=ZC3HAV1 PE=1 SV=3	#CTPSPDQISHR	#CTPSPDQISHR	2	2	0.9	1	0.95	0.0707107	7.44323
P04080	3	CSTB	CSTB_C3	CYTB_HUMAN Cystatin-B OS=Homo sapiens OX=9606 GN=CSTB PE=1 SV=2	#CGAPSATQPATAETQHIADQVR	#CGAPSATQPATAETQHIADQVR	2	2	0.76	1.14	0.95	0.268701	28.2843
O15270	425	SPTLC2	SPTLC2_C425	SPTC2_HUMAN Serine palmitoyltransferase 2 OS=Homo sapiens OX=9606 GN=SPTLC2 PE=1 SV=1	NA	#CIMGQDGTSLGK	NA	1	NA	0.95	0.95	NA	NA
Q8WXA9	494	SREK1	SREK1_C494	SREK1_HUMAN Splicing regulatory glutamine/lysine-rich protein 1 OS=Homo sapiens OX=9606 GN=SREK1 PE=1 SV=1	NA	#CQLNEENLSTK	NA	2	NA	0.95	0.95	NA	NA
Q86XA9	868	HEATR5A	HEATR5A_C868	HTR5A_HUMAN HEAT repeat-containing protein 5A OS=Homo sapiens OX=9606 GN=HEATR5A PE=1 SV=2	NA	#CAAAESWAR	NA	2	NA	0.95	0.95	NA	NA
Q13144	196	EIF2B5	EIF2B5_C196	EI2BE_HUMAN Translation initiation factor eIF-2B subunit epsilon OS=Homo sapiens OX=9606 GN=EIF2B5 PE=1 SV=3	NA	#CHEDNVVVAVDSTTNR	NA	3	NA	0.95	0.95	NA	NA
P52888	18	THOP1	THOP1_C18	THOP1_HUMAN Thimet oligopeptidase OS=Homo sapiens OX=9606 GN=THOP1 PE=1 SV=2	NA	#CSVVNDLR	NA	1	NA	0.95	0.95	NA	NA
Q86VP6	527	CAND1	CAND1_C527	CAND1_HUMAN Cullin-associated NEDD8-dissociated protein 1 OS=Homo sapiens OX=9606 GN=CAND1 PE=1 SV=2	NA	#CVGDPFYK	NA	2	NA	0.95	0.95	NA	NA
O14579	225	COPE	COPE_C225	COPE_HUMAN Coatomer subunit epsilon OS=Homo sapiens OX=9606 GN=COPE PE=1 SV=3	NA	#CHMAQGR	NA	3	NA	0.95	0.95	NA	NA
Q13085	868	ACACA	ACACA_C868	ACACA_HUMAN Acetyl-CoA carboxylase 1 OS=Homo sapiens OX=9606 GN=ACACA PE=1 SV=2	NA	#CLPDPFFSSK	NA	2	NA	0.95	0.95	NA	NA
Q15154	876	PCM1	PCM1_C876	PCM1_HUMAN Pericentriolar material 1 protein OS=Homo sapiens OX=9606 GN=PCM1 PE=1 SV=5	NA	#CTPQQSR	NA	1	NA	0.95	0.95	NA	NA
O95817	179	BAG3	BAG3_C179	BAG3_HUMAN BAG family molecular chaperone regulator 3 OS=Homo sapiens OX=9606 GN=BAG3 PE=1 SV=3	NA	#CSSSSSSASLPSSGR	NA	1	NA	0.95	0.95	NA	NA
Q9NZM1	610	MYOF	MYOF_C610	MYOF_HUMAN Myoferlin OS=Homo sapiens OX=9606 GN=MYOF PE=1 SV=1	#CKPLASTTQYSR #CKPLASTTQ #CKPLASTT	#CKPLASTT #CKPLASTTQYSR	5	3	0.88	1.01	0.945	0.0919239	9.72739
O15228	54	GNPAT	GNPAT_C54	GNPAT_HUMAN Dihydroxyacetone phosphate acyltransferase OS=Homo sapiens OX=9606 GN=GNPAT PE=1 SV=1	#CYTPLVYK	#CYTPLVYK	4	2	0.95	0.94	0.945	0.00707107	0.748261
P62829	125	RPL23	RPL23_C125	RL23_HUMAN 60S ribosomal protein L23 OS=Homo sapiens OX=9606 GN=RPL23 PE=1 SV=1	#CADLWPR	#CADLWPR	6	8	0.95	0.94	0.945	0.00707107	0.748261
Q00839	648	HNRNPU	HNRNPU_C648	HNRPU_HUMAN Heterogeneous nuclear ribonucleoprotein U OS=Homo sapiens OX=9606 GN=HNRNPU PE=1 SV=6	NA	#CFDEITYVELQK #CFDEITY	NA	4	NA	0.945	0.945	NA	NA
Q13501	331	SQSTM1	SQSTM1_C331	SQSTM_HUMAN Sequestosome-1 OS=Homo sapiens OX=9606 GN=SQSTM1 PE=1 SV=1	#CSGGDDDWTHLSSK #CSGGDDDWTHLS	#CSGGDDDWTHLSSK #CSGGDDDWTHLS	4	4	0.98	0.905	0.9425	0.053033	5.62684
Q9UJX2	537	CDC23	CDC23_C537	CDC23_HUMAN Cell division cycle protein 23 homolog OS=Homo sapiens OX=9606 GN=CDC23 PE=1 SV=3	#CAFNDTR	#CAFNDTR	1	2	0.97	0.91	0.94	0.0424264	4.51345
Q9H553	70	ALG2	ALG2_C70	ALG2_HUMAN Alpha-1,3/1,6-mannosyltransferase ALG2 OS=Homo sapiens OX=9606 GN=ALG2 PE=1 SV=1	#CAGDWLPR	#CAGDWLPR	3	1	0.96	0.92	0.94	0.0282843	3.00897
Q9BU89	200	DOHH	DOHH_C200	DOHH_HUMAN Deoxyhypusine hydroxylase OS=Homo sapiens OX=9606 GN=DOHH PE=1 SV=1	#CGSALFR	NA	1	NA	0.94	NA	0.94	NA	NA
Q7L576	519	CYFIP1	CYFIP1_C519	CYFP1_HUMAN Cytoplasmic FMR1-interacting protein 1 OS=Homo sapiens OX=9606 GN=CYFIP1 PE=1 SV=1	#CDWETGHEPFNDPALR	NA	1	NA	0.94	NA	0.94	NA	NA
P07814	1448	EPRS	EPRS_C1448	SYEP_HUMAN Bifunctional glutamate/proline--tRNA ligase OS=Homo sapiens OX=9606 GN=EPRS PE=1 SV=5	#CGEIDCEDWIK	NA	3	NA	0.94	NA	0.94	NA	NA
Q7L5Y1	194	ENOSF1	ENOSF1_C194	ENOF1_HUMAN Mitochondrial enolase superfamily member 1 OS=Homo sapiens OX=9606 GN=ENOSF1 PE=1 SV=1	#CAWLGYSDDTLK	NA	1	NA	0.94	NA	0.94	NA	NA
P51570	351	GALK1	GALK1_C351	GALK1_HUMAN Galactokinase OS=Homo sapiens OX=9606 GN=GALK1 PE=1 SV=1	#CTVTLLEASAAPH	#CTVTLLEASAAPH	2	1	0.93	0.95	0.94	0.0141421	1.50448
Q15149	992	PLEC	PLEC_C992	PLEC_HUMAN Plectin OS=Homo sapiens OX=9606 GN=PLEC PE=1 SV=3	#CFLVPPPNQEAQEAVTR	#CFLVPPPNQEAQEAVTR	1	1	0.93	0.95	0.94	0.0141421	1.50448
P49585	37	PCYT1A	PCYT1A_C37	PCY1A_HUMAN Choline-phosphate cytidylyltransferase A OS=Homo sapiens OX=9606 GN=PCYT1A PE=1 SV=2	#CAVGLR	#CAVGLR	1	1	0.9	0.98	0.94	0.0565685	6.01793
P23528	139	CFL1	CFL1_C139	COF1_HUMAN Cofilin-1 OS=Homo sapiens OX=9606 GN=CFL1 PE=1 SV=3	#CYEEVKDR	#CYEEVK	5	1	0.68	1.2	0.94	0.367696	39.1165
Q14204	3573	DYNC1H1	DYNC1H1_C3573	DYHC1_HUMAN Cytoplasmic dynein 1 heavy chain 1 OS=Homo sapiens OX=9606 GN=DYNC1H1 PE=1 SV=5	NA	#CTENAIMLK	NA	2	NA	0.94	0.94	NA	NA
Q9UNM6	49	PSMD13	PSMD13_C49	PSD13_HUMAN 26S proteasome non-ATPase regulatory subunit 13 OS=Homo sapiens OX=9606 GN=PSMD13 PE=1 SV=2	NA	#CFAQGDGLIK	NA	2	NA	0.94	0.94	NA	NA
Q96SQ9	155	CYP2S1	CYP2S1_C155	CP2S1_HUMAN Cytochrome P450 2S1 OS=Homo sapiens OX=9606 GN=CYP2S1 PE=1 SV=2	NA	#CLVETFQGTEGR	NA	1	NA	0.94	0.94	NA	NA
Q9HB90	377	RRAGC	RRAGC_C377	RRAGC_HUMAN Ras-related GTP-binding protein C OS=Homo sapiens OX=9606 GN=RRAGC PE=1 SV=1	NA	#CGHQTSAS	NA	1	NA	0.94	0.94	NA	NA
Q14566	302	MCM6	MCM6_C302	MCM6_HUMAN DNA replication licensing factor MCM6 OS=Homo sapiens OX=9606 GN=MCM6 PE=1 SV=1	NA	#CVAPTNPR	NA	2	NA	0.94	0.94	NA	NA
P05386	61	RPLP1	RPLP1_C61	RLA1_HUMAN 60S acidic ribosomal protein P1 OS=Homo sapiens OX=9606 GN=RPLP1 PE=1 SV=1	#CNVGAGGPAPAAGAAPAGGPAPSTAAAPAEEK	#CNVGAGGPAPAAGAAPAGGPAPSTAAAPAEEK	2	2	1.015	0.86	0.9375	0.109602	11.6908
Q5JRX3	556	PITRM1	PITRM1_C556	PREP_HUMAN Presequence protease, mitochondrial OS=Homo sapiens OX=9606 GN=PITRM1 PE=1 SV=3	#CLPALK	#CLPALK	1	1	1.1	0.77	0.935	0.233345	24.9567
Q13813	2233	SPTAN1	SPTAN1_C2233	SPTN1_HUMAN Spectrin alpha chain, non-erythrocytic 1 OS=Homo sapiens OX=9606 GN=SPTAN1 PE=1 SV=3	#CMVEESGTLESQLEATK	#CMVEESGTLESQLEATK	1	1	0.93	0.94	0.935	0.00707107	0.756264
Q9NZM1	1402	MYOF	MYOF_C1402	MYOF_HUMAN Myoferlin OS=Homo sapiens OX=9606 GN=MYOF PE=1 SV=1	#CDPYAGKEDIVPQ #CDPYAGKEDIVPQLK #CDPYAGK	#CDPYAGKEDIVPQLK #CDPYAGK	8	5	1.005	0.86	0.9325	0.10253	10.9952
Q9BZ68	246	FRMD8P1	FRMD8P1_C246	FR8P1_HUMAN Putative FERM domain-containing protein FRMD8P1 OS=Homo sapiens OX=9606 GN=FRMD8P1 PE=5 SV=2	#CEAALGTHYR	NA	1	NA	0.93	NA	0.93	NA	NA
Q86XZ4	248	SPATS2	SPATS2_C248	SPAS2_HUMAN Spermatogenesis-associated serine-rich protein 2 OS=Homo sapiens OX=9606 GN=SPATS2 PE=1 SV=1	#CTVSLAR	NA	1	NA	0.93	NA	0.93	NA	NA
Q5T4S7	3721	UBR4	UBR4_C3721	UBR4_HUMAN E3 ubiquitin-protein ligase UBR4 OS=Homo sapiens OX=9606 GN=UBR4 PE=1 SV=1	#CAVDPIENEEDR	NA	1	NA	0.93	NA	0.93	NA	NA
Q9UKJ3	247	GPATCH8	GPATCH8_C247	GPTC8_HUMAN G patch domain-containing protein 8 OS=Homo sapiens OX=9606 GN=GPATCH8 PE=1 SV=2	#CGLGSEFSTDK	NA	1	NA	0.93	NA	0.93	NA	NA
Q1KMD3	308	HNRNPUL2	HNRNPUL2_C308	HNRL2_HUMAN Heterogeneous nuclear ribonucleoprotein U-like protein 2 OS=Homo sapiens OX=9606 GN=HNRNPUL2 PE=1 SV=1	#CTEVSLLR	NA	1	NA	0.93	NA	0.93	NA	NA
O95429	193	BAG4	BAG4_C193	BAG4_HUMAN BAG family molecular chaperone regulator 4 OS=Homo sapiens OX=9606 GN=BAG4 PE=1 SV=1	NA	#CQTEAPPLR	NA	1	NA	0.93	0.93	NA	NA
Q93100	348	PHKB	PHKB_C348	KPBB_HUMAN Phosphorylase b kinase regulatory subunit beta OS=Homo sapiens OX=9606 GN=PHKB PE=1 SV=3	NA	#CYYKPAEIK	NA	1	NA	0.93	0.93	NA	NA
P07738	23	BPGM	BPGM_C23	PMGE_HUMAN Bisphosphoglycerate mutase OS=Homo sapiens OX=9606 GN=BPGM PE=1 SV=2	NA	#CSWVDQK	NA	1	NA	0.93	0.93	NA	NA
Q86SJ2	121	AMIGO2	AMIGO2_C121	AMGO2_HUMAN Amphoterin-induced protein 2 OS=Homo sapiens OX=9606 GN=AMIGO2 PE=1 SV=1	NA	#CLDLSSNK	NA	1	NA	0.93	0.93	NA	NA
Q9H9S3	13	SEC61A2	SEC61A2_C13	S61A2_HUMAN Protein transport protein Sec61 subunit alpha isoform 2 OS=Homo sapiens OX=9606 GN=SEC61A2 PE=2 SV=3	NA	#CAVLPEIQKPER	NA	1	NA	0.93	0.93	NA	NA
P49790	1129	NUP153	NUP153_C1129	NU153_HUMAN Nuclear pore complex protein Nup153 OS=Homo sapiens OX=9606 GN=NUP153 PE=1 SV=2	NA	#CQPVFSFGNSEQTK	NA	2	NA	0.93	0.93	NA	NA
Q14160	22	SCRIB	SCRIB_C22	SCRIB_HUMAN Protein scribble homolog OS=Homo sapiens OX=9606 GN=SCRIB PE=1 SV=4	#CSLQAVPEEIYR	#CSLQAVPEEIYR	2	2	0.88	0.98	0.93	0.0707107	7.6033
O75815	261	BCAR3	BCAR3_C261	BCAR3_HUMAN Breast cancer anti-estrogen resistance protein 3 OS=Homo sapiens OX=9606 GN=BCAR3 PE=1 SV=1	#CLEEHYGTSPGQAR	#CLEEHYGTSPGQAR	2	1	1.035	0.82	0.9275	0.152028	16.3912
O00410	229	IPO5	IPO5_C229	IPO5_HUMAN Importin-5 OS=Homo sapiens OX=9606 GN=IPO5 PE=1 SV=4	#CYQNDDSVLK	#CYQNDDSVLK	1	2	0.87	0.985	0.9275	0.0813173	8.76736
Q8N2K0	52	ABHD12	ABHD12_C52	ABD12_HUMAN Lysophosphatidylserine lipase ABHD12 OS=Homo sapiens OX=9606 GN=ABHD12 PE=1 SV=2	#CAADAGMK	#CAADAGMK	3	2	0.86	0.99	0.925	0.0919239	9.93772
O00410	180	IPO5	IPO5_C180	IPO5_HUMAN Importin-5 OS=Homo sapiens OX=9606 GN=IPO5 PE=1 SV=4	#CMQDQEHPSIR	#CMQDQEHPSIR	4	2	1.01	0.835	0.9225	0.123744	13.4139
O00410	110	IPO5	IPO5_C110	IPO5_HUMAN Importin-5 OS=Homo sapiens OX=9606 GN=IPO5 PE=1 SV=4	#CDIAAELAR	#CDIAAELAR	1	2	0.87	0.975	0.9225	0.0742462	8.04837
Q9C0J8	249	WDR33	WDR33_C249	WDR33_HUMAN pre-mRNA 3' end processing protein WDR33 OS=Homo sapiens OX=9606 GN=WDR33 PE=1 SV=2	#CVDWHPTK	NA	1	NA	0.92	NA	0.92	NA	NA
Q9H6X2	481	ANTXR1	ANTXR1_C481	ANTR1_HUMAN Anthrax toxin receptor 1 OS=Homo sapiens OX=9606 GN=ANTXR1 PE=1 SV=2	#CINFTR	NA	1	NA	0.92	NA	0.92	NA	NA
Q96CS3	349	FAF2	FAF2_C349	FAF2_HUMAN FAS-associated factor 2 OS=Homo sapiens OX=9606 GN=FAF2 PE=1 SV=2	#CLPPEPSPDDPESVK	NA	1	NA	0.92	NA	0.92	NA	NA
O15014	178	ZNF609	ZNF609_C178	ZN609_HUMAN Zinc finger protein 609 OS=Homo sapiens OX=9606 GN=ZNF609 PE=1 SV=2	#CSEKDPGVLQPVPLGGR	NA	1	NA	0.92	NA	0.92	NA	NA
Q9P0R6	59	GSKIP	GSKIP_C59	GSKIP_HUMAN GSK3B-interacting protein OS=Homo sapiens OX=9606 GN=GSKIP PE=1 SV=2	#CADDVAYINVETK	NA	1	NA	0.92	NA	0.92	NA	NA
Q9UBF2	325	COPG2	COPG2_C325	COPG2_HUMAN Coatomer subunit gamma-2 OS=Homo sapiens OX=9606 GN=COPG2 PE=1 SV=1	#CNLDLENLITDSNR	NA	1	NA	0.92	NA	0.92	NA	NA
P08238	412	HSP90AB1	HSP90AB1_C412	HS90B_HUMAN Heat shock protein HSP 90-beta OS=Homo sapiens OX=9606 GN=HSP90AB1 PE=1 SV=4	#CLELFSELAEDKENYK	NA	1	NA	0.92	NA	0.92	NA	NA
Q8N9T8	591	KRI1	KRI1_C591	KRI1_HUMAN Protein KRI1 homolog OS=Homo sapiens OX=9606 GN=KRI1 PE=1 SV=3	#CREEAETPAEATGKPQR	NA	1	NA	0.92	NA	0.92	NA	NA
Q9BZ95	495	NSD3	NSD3_C495	NSD3_HUMAN Histone-lysine N-methyltransferase NSD3 OS=Homo sapiens OX=9606 GN=NSD3 PE=1 SV=1	#CNMSPVVK	NA	1	NA	0.92	NA	0.92	NA	NA
Q14008	1946	CKAP5	CKAP5_C1946	CKAP5_HUMAN Cytoskeleton-associated protein 5 OS=Homo sapiens OX=9606 GN=CKAP5 PE=1 SV=3	#CGLDNTK	NA	1	NA	0.92	NA	0.92	NA	NA
Q7L2J0	54	MEPCE	MEPCE_C54	MEPCE_HUMAN 7SK snRNA methylphosphate capping enzyme OS=Homo sapiens OX=9606 GN=MEPCE PE=1 SV=1	#CAPSAGSPAAAVGR	#CAPSAGSPAAAVGR	3	2	0.8	1.04	0.92	0.169706	18.4463
Q02880	476	TOP2B	TOP2B_C476	TOP2B_HUMAN DNA topoisomerase 2-beta OS=Homo sapiens OX=9606 GN=TOP2B PE=1 SV=3	NA	#CTLILTEGDSAK	NA	2	NA	0.92	0.92	NA	NA
Q9NZ63	145	C9orf78	C9orf78_C145	TLS1_HUMAN Telomere length and silencing protein 1 homolog OS=Homo sapiens OX=9606 GN=C9orf78 PE=1 SV=1	NA	#CLYELPENIR	NA	1	NA	0.92	0.92	NA	NA
Q9NRU3	733	CNNM1	CNNM1_C733	CNNM1_HUMAN Metal transporter CNNM1 OS=Homo sapiens OX=9606 GN=CNNM1 PE=1 SV=3	NA	#CSGLNR	NA	2	NA	0.92	0.92	NA	NA
O75909	99	CCNK	CCNK_C99	CCNK_HUMAN Cyclin-K OS=Homo sapiens OX=9606 GN=CCNK PE=1 SV=2	#CLFLAGK	#CLFLAGK	1	1	1	0.84	0.92	0.113137	12.2975
Q9Y3F4	305	STRAP	STRAP_C305	STRAP_HUMAN Serine-threonine kinase receptor-associated protein OS=Homo sapiens OX=9606 GN=STRAP PE=1 SV=1	#CVLPEEDSGELAKPK	#CVLPEEDSGELAKPK	2	4	0.9	0.94	0.92	0.0282843	3.07438
Q9HCU5	128	PREB	PREB_C128	PREB_HUMAN Prolactin regulatory element-binding protein OS=Homo sapiens OX=9606 GN=PREB PE=1 SV=2	#CGAETQHEGLELR	#CGAETQHEGLELR	2	2	0.89	0.95	0.92	0.0424264	4.61157
Q99439	215	CNN2	CNN2_C215	CNN2_HUMAN Calponin-2 OS=Homo sapiens OX=9606 GN=CNN2 PE=1 SV=4	#CASQVGMTAPGTR	#CASQVGMTAPGTR	3	2	0.87	0.97	0.92	0.0707107	7.68594
Q7Z6B0	247	CCDC91	CCDC91_C247	CCD91_HUMAN Coiled-coil domain-containing protein 91 OS=Homo sapiens OX=9606 GN=CCDC91 PE=1 SV=2	#CEELLNAQHQR	#CEELLNAQHQR	3	2	0.85	0.99	0.92	0.0989949	10.7603
Q9Y2T2	10	AP3M1	AP3M1_C10	AP3M1_HUMAN AP-3 complex subunit mu-1 OS=Homo sapiens OX=9606 GN=AP3M1 PE=1 SV=1	#CSGDIFLEK	#CSGDIFLEK	1	1	1.08	0.75	0.915	0.233345	25.5022
P23526	228	AHCY	AHCY_C228	SAHH_HUMAN Adenosylhomocysteinase OS=Homo sapiens OX=9606 GN=AHCY PE=1 SV=4	#CAQALR	NA	2	NA	0.915	NA	0.915	NA	NA
Q9Y4K0	424	LOXL2	LOXL2_C424	LOXL2_HUMAN Lysyl oxidase homolog 2 OS=Homo sapiens OX=9606 GN=LOXL2 PE=1 SV=1	#CNTPAMGLQK	#CNTPAMGLQK	1	1	0.89	0.94	0.915	0.0353553	3.86397
Q9UGI8	164	TES	TES_C164	TES_HUMAN Testin OS=Homo sapiens OX=9606 GN=TES PE=1 SV=1	#CHELSPR	#CHELSPR	2	1	0.46	1.37	0.915	0.643467	70.3243
P29372	61	MPG	MPG_C61	3MG_HUMAN DNA-3-methyladenine glycosylase OS=Homo sapiens OX=9606 GN=MPG PE=1 SV=3	#CLGPPTTPGPYR	#CLGPPTTPGPYR	3	2	0.93	0.89	0.91	0.0282843	3.10816
Q13572	391	ITPK1	ITPK1_C391	ITPK1_HUMAN Inositol-tetrakisphosphate 1-kinase OS=Homo sapiens OX=9606 GN=ITPK1 PE=1 SV=2	#CNAGVSPSFQQH	NA	1	NA	0.91	NA	0.91	NA	NA
Q8NI27	1111	THOC2	THOC2_C1111	THOC2_HUMAN THO complex subunit 2 OS=Homo sapiens OX=9606 GN=THOC2 PE=1 SV=2	#CLETGEYTHIR	NA	1	NA	0.91	NA	0.91	NA	NA
P51649	340	ALDH5A1	ALDH5A1_C340	SSDH_HUMAN Succinate-semialdehyde dehydrogenase, mitochondrial OS=Homo sapiens OX=9606 GN=ALDH5A1 PE=1 SV=2	#CVCSNQFLVQR	NA	1	NA	0.91	NA	0.91	NA	NA
P56192	12	MARS	MARS_C12	SYMC_HUMAN Methionine--tRNA ligase, cytoplasmic OS=Homo sapiens OX=9606 GN=MARS PE=1 SV=2	#CLPVLAAAGR	NA	3	NA	0.91	NA	0.91	NA	NA
Q13085	1116	ACACA	ACACA_C1116	ACACA_HUMAN Acetyl-CoA carboxylase 1 OS=Homo sapiens OX=9606 GN=ACACA PE=1 SV=2	NA	#CIENLQK	NA	1	NA	0.91	0.91	NA	NA
Q8TD19	626	NEK9	NEK9_C626	NEK9_HUMAN Serine/threonine-protein kinase Nek9 OS=Homo sapiens OX=9606 GN=NEK9 PE=1 SV=2	NA	#CGQLGVGNYK	NA	1	NA	0.91	0.91	NA	NA
Q9ULR3	30	PPM1H	PPM1H_C30	PPM1H_HUMAN Protein phosphatase 1H OS=Homo sapiens OX=9606 GN=PPM1H PE=1 SV=2	NA	#CGGSDLPLR	NA	2	NA	0.91	0.91	NA	NA
O60825	105	PFKFB2	PFKFB2_C105	F262_HUMAN 6-phosphofructo-2-kinase/fructose-2,6-bisphosphatase 2 OS=Homo sapiens OX=9606 GN=PFKFB2 PE=1 SV=2	NA	#CALVALEDVK	NA	2	NA	0.91	0.91	NA	NA
P63241	129	EIF5A	EIF5A_C129	IF5A1_HUMAN Eukaryotic translation initiation factor 5A-1 OS=Homo sapiens OX=9606 GN=EIF5A PE=1 SV=2	NA	#CGEEILIT	NA	1	NA	0.91	0.91	NA	NA
P53618	235	COPB1	COPB1_C235	COPB_HUMAN Coatomer subunit beta OS=Homo sapiens OX=9606 GN=COPB1 PE=1 SV=3	NA	#CHANPSER	NA	1	NA	0.91	0.91	NA	NA
Q2TAL8	713	QRICH1	QRICH1_C713	QRIC1_HUMAN Glutamine-rich protein 1 OS=Homo sapiens OX=9606 GN=QRICH1 PE=1 SV=1	NA	#CPQSVK	NA	1	NA	0.91	0.91	NA	NA
P23921	779	RRM1	RRM1_C779	RIR1_HUMAN Ribonucleoside-diphosphate reductase large subunit OS=Homo sapiens OX=9606 GN=RRM1 PE=1 SV=1	NA	#CSLENR	NA	1	NA	0.91	0.91	NA	NA
P21333	796	FLNA	FLNA_C796	FLNA_HUMAN Filamin-A OS=Homo sapiens OX=9606 GN=FLNA PE=1 SV=4	#CAEAGQGDVSIGIK	#CAEAGQGDVSIGIK	2	7	0.86	0.96	0.91	0.0707107	7.7704
Q8N3V7	382	SYNPO	SYNPO_C382	SYNPO_HUMAN Synaptopodin OS=Homo sapiens OX=9606 GN=SYNPO PE=1 SV=2	#CADGQPQAPAEEVR	#CADGQPQAPAEEVR	3	1	1.01	0.8	0.905	0.148492	16.408
Q63HN8	3609	RNF213	RNF213_C3609	RN213_HUMAN E3 ubiquitin-protein ligase RNF213 OS=Homo sapiens OX=9606 GN=RNF213 PE=1 SV=3	#CNQDALQEAGTFR	#CNQDALQEAGTFR	2	1	0.99	0.82	0.905	0.120208	13.2827
Q86VP6	802	CAND1	CAND1_C802	CAND1_HUMAN Cullin-associated NEDD8-dissociated protein 1 OS=Homo sapiens OX=9606 GN=CAND1 PE=1 SV=2	#CVAALTR	#CVAALTR	3	1	0.94	0.87	0.905	0.0494975	5.46933
Q13247	121	SRSF6	SRSF6_C121	SRSF6_HUMAN Serine/arginine-rich splicing factor 6 OS=Homo sapiens OX=9606 GN=SRSF6 PE=1 SV=2	NA	#CSWQDLK	NA	2	NA	0.905	0.905	NA	NA
P27824	360	CANX	CANX_C360	CALX_HUMAN Calnexin OS=Homo sapiens OX=9606 GN=CANX PE=1 SV=2	#CESAPGCGVWQR	#CESAPGCGVWQR	2	1	0.915	0.89	0.9025	0.0176777	1.95874
O60716	450	CTNND1	CTNND1_C450	CTND1_HUMAN Catenin delta-1 OS=Homo sapiens OX=9606 GN=CTNND1 PE=1 SV=1	#CDGVPALVR	#CDGVPALVR	4	3	0.735	1.07	0.9025	0.236881	26.2472
Q04446	81	GBE1	GBE1_C81	GLGB_HUMAN 1,4-alpha-glucan-branching enzyme OS=Homo sapiens OX=9606 GN=GBE1 PE=1 SV=3	#CADGGLYCK	#CADGGLYCK	5	2	0.84	0.965	0.9025	0.0883883	9.79372
Q9P0L0	128	VAPA	VAPA_C128	VAPA_HUMAN Vesicle-associated membrane protein-associated protein A OS=Homo sapiens OX=9606 GN=VAPA PE=1 SV=3	#CVFEMPNENDK #CVFEMPNENDKLNDMEPSK	#CVFEMPNENDKLNDMEPSK	4	1	0.92	0.88	0.9	0.0282843	3.1427
Q8N2G8	462	GHDC	GHDC_C462	GHDC_HUMAN GH3 domain-containing protein OS=Homo sapiens OX=9606 GN=GHDC PE=1 SV=2	#CLQEASPR	NA	1	NA	0.9	NA	0.9	NA	NA
Q9UHY1	307	NRBP1	NRBP1_C307	NRBP_HUMAN Nuclear receptor-binding protein OS=Homo sapiens OX=9606 GN=NRBP1 PE=1 SV=1	#CLQSEPAR	NA	1	NA	0.9	NA	0.9	NA	NA
Q12888	772	TP53BP1	TP53BP1_C772	TP53B_HUMAN TP53-binding protein 1 OS=Homo sapiens OX=9606 GN=TP53BP1 PE=1 SV=2	#CEPLEGVEK	NA	1	NA	0.9	NA	0.9	NA	NA
O00273	154	DFFA	DFFA_C154	DFFA_HUMAN DNA fragmentation factor subunit alpha OS=Homo sapiens OX=9606 GN=DFFA PE=1 SV=1	#CSDLAQELR	NA	1	NA	0.9	NA	0.9	NA	NA
Q6NSJ5	156	LRRC8E	LRRC8E_C156	LRC8E_HUMAN Volume-regulated anion channel subunit LRRC8E OS=Homo sapiens OX=9606 GN=LRRC8E PE=1 SV=2	#CFDSPWTTR	NA	1	NA	0.9	NA	0.9	NA	NA
Q12979	201	ABR	ABR_C201	ABR_HUMAN Active breakpoint cluster region-related protein OS=Homo sapiens OX=9606 GN=ABR PE=1 SV=2	#CSQSNNQFQK	NA	1	NA	0.9	NA	0.9	NA	NA
Q9UIA9	47	XPO7	XPO7_C47	XPO7_HUMAN Exportin-7 OS=Homo sapiens OX=9606 GN=XPO7 PE=1 SV=3	#CQLLLER	#CQLLLER	3	1	0.87	0.93	0.9	0.0424264	4.71405
O60701	20	UGDH	UGDH_C20	UGDH_HUMAN UDP-glucose 6-dehydrogenase OS=Homo sapiens OX=9606 GN=UGDH PE=1 SV=1	#CSVIAH #CSVIAHMCPEIR	#CSVIAH	5	1	0.49	1.31	0.9	0.579828	64.4253
Q96C36	95	PYCR2	PYCR2_C95	P5CR2_HUMAN Pyrroline-5-carboxylate reductase 2 OS=Homo sapiens OX=9606 GN=PYCR2 PE=1 SV=1	NA	#CAAGVTISSVEK	NA	1	NA	0.9	0.9	NA	NA
Q96GQ5	201	C16orf58	C16orf58_C201	RUS1_HUMAN RUS1 family protein C16orf58 OS=Homo sapiens OX=9606 GN=C16orf58 PE=1 SV=2	NA	#CIVSVAGGATR	NA	1	NA	0.9	0.9	NA	NA
Q6UB35	198	MTHFD1L	MTHFD1L_C198	C1TM_HUMAN Monofunctional C1-tetrahydrofolate synthase, mitochondrial OS=Homo sapiens OX=9606 GN=MTHFD1L PE=1 SV=1	NA	#CFVSPVAK	NA	1	NA	0.9	0.9	NA	NA
P26639	254	TARS	TARS_C254	SYTC_HUMAN Threonine--tRNA ligase, cytoplasmic OS=Homo sapiens OX=9606 GN=TARS PE=1 SV=3	NA	#CGPLIDLCR	NA	2	NA	0.9	0.9	NA	NA
Q99733	77	NAP1L4	NAP1L4_C77	NP1L4_HUMAN Nucleosome assembly protein 1-like 4 OS=Homo sapiens OX=9606 GN=NAP1L4 PE=1 SV=1	NA	#CAHIEAK	NA	3	NA	0.9	0.9	NA	NA
P35568	923	IRS1	IRS1_C923	IRS1_HUMAN Insulin receptor substrate 1 OS=Homo sapiens OX=9606 GN=IRS1 PE=1 SV=1	NA	#CPSQLQPAPR	NA	2	NA	0.9	0.9	NA	NA
Q93074	83	MED12	MED12_C83	MED12_HUMAN Mediator of RNA polymerase II transcription subunit 12 OS=Homo sapiens OX=9606 GN=MED12 PE=1 SV=4	NA	#CNTLPDTGR	NA	1	NA	0.9	0.9	NA	NA
Q16537	106	PPP2R5E	PPP2R5E_C106	2A5E_HUMAN Serine/threonine-protein phosphatase 2A 56 kDa regulatory subunit epsilon isoform OS=Homo sapiens OX=9606 GN=PPP2R5E PE=1 SV=1	#CLTEQTYPEVVR	#CLTEQTYPEVVR	2	2	0.85	0.95	0.9	0.0707107	7.85674
P23919	163	DTYMK	DTYMK_C163	KTHY_HUMAN Thymidylate kinase OS=Homo sapiens OX=9606 GN=DTYMK PE=1 SV=4	#CFHQLMK	#CFHQLMK	2	3	1.06	0.73	0.895	0.233345	26.0721
Q8N8R5	43	C2orf69	C2orf69_C43	CB069_HUMAN UPF0565 protein C2orf69 OS=Homo sapiens OX=9606 GN=C2orf69 PE=1 SV=1	#CSLSAEVR	#CSLSAEVR	2	1	0.98	0.81	0.895	0.120208	13.4311
P12268	140	IMPDH2	IMPDH2_C140	IMDH2_HUMAN Inosine-5'-monophosphate dehydrogenase 2 OS=Homo sapiens OX=9606 GN=IMPDH2 PE=1 SV=2	#CGIPITDTGR	#CGIPITDTGR	5	11	0.91	0.88	0.895	0.0212132	2.37019
Q14204	1977	DYNC1H1	DYNC1H1_C1977	DYHC1_HUMAN Cytoplasmic dynein 1 heavy chain 1 OS=Homo sapiens OX=9606 GN=DYNC1H1 PE=1 SV=5	#CIQEALR	#CIQEALR	3	2	0.89	0.9	0.895	0.00707107	0.790063
Q15005	17	SPCS2	SPCS2_C17	SPCS2_HUMAN Signal peptidase complex subunit 2 OS=Homo sapiens OX=9606 GN=SPCS2 PE=1 SV=3	#CSGAGGASNCGTGSGR	#CSGAGGASNCGTGSGR	2	1	0.87	0.92	0.895	0.0353553	3.95032
O95260	79	ATE1	ATE1_C79	ATE1_HUMAN Arginyl-tRNA--protein transferase 1 OS=Homo sapiens OX=9606 GN=ATE1 PE=1 SV=2	#CRPLQFQPSK	#CRPLQFQPSK	1	1	0.85	0.94	0.895	0.0636396	7.11057
Q9Y394	147	DHRS7	DHRS7_C147	DHRS7_HUMAN Dehydrogenase/reductase SDR family member 7 OS=Homo sapiens OX=9606 GN=DHRS7 PE=1 SV=1	#CMDTSLDVYR	#CMDTSLDVYR	1	2	0.78	1.01	0.895	0.162635	18.1715
Q14676	26	MDC1	MDC1_C26	MDC1_HUMAN Mediator of DNA damage checkpoint protein 1 OS=Homo sapiens OX=9606 GN=MDC1 PE=1 SV=3	#CNVEPVGR	#CNVEPVGR	2	2	0.7	1.09	0.895	0.275772	30.8125
P49327	1828	FASN	FASN_C1828	FAS_HUMAN Fatty acid synthase OS=Homo sapiens OX=9606 GN=FASN PE=1 SV=3	NA	#CTVFHGA #CTVFHGAQVE	NA	6	NA	0.895	0.895	NA	NA
Q86XZ4	406	SPATS2	SPATS2_C406	SPAS2_HUMAN Spermatogenesis-associated serine-rich protein 2 OS=Homo sapiens OX=9606 GN=SPATS2 PE=1 SV=1	#CASPPSLTSANK	#CASPPSLTSANK	2	2	0.8	0.985	0.8925	0.130815	14.6571
P83731	6	RPL24	RPL24_C6	RL24_HUMAN 60S ribosomal protein L24 OS=Homo sapiens OX=9606 GN=RPL24 PE=1 SV=1	#CSFSGYK	#CSFSGYK	1	1	1.01	0.77	0.89	0.169706	19.068
Q8TD19	25	NEK9	NEK9_C25	NEK9_HUMAN Serine/threonine-protein kinase Nek9 OS=Homo sapiens OX=9606 GN=NEK9 PE=1 SV=2	#CGDSSPGPSASQGPR	#CGDSSPGPSASQGPR	2	2	0.99	0.79	0.89	0.141421	15.89
P31939	363	ATIC	ATIC_C363	PUR9_HUMAN Bifunctional purine biosynthesis protein PURH OS=Homo sapiens OX=9606 GN=ATIC PE=1 SV=3	#CVLQMDQSYKPDENEVR	NA	1	NA	0.89	NA	0.89	NA	NA
Q9NZB2	14	FAM120A	FAM120A_C14	F120A_HUMAN Constitutive coactivator of PPAR-gamma-like protein 1 OS=Homo sapiens OX=9606 GN=FAM120A PE=1 SV=2	#CPSAVVPVELQK	NA	1	NA	0.89	NA	0.89	NA	NA
P55036	58	PSMD4	PSMD4_C58	PSMD4_HUMAN 26S proteasome non-ATPase regulatory subunit 4 OS=Homo sapiens OX=9606 GN=PSMD4 PE=1 SV=1	#CEVLTTLTPDTGR	NA	2	NA	0.89	NA	0.89	NA	NA
Q15910	414	EZH2	EZH2_C414	EZH2_HUMAN Histone-lysine N-methyltransferase EZH2 OS=Homo sapiens OX=9606 GN=EZH2 PE=1 SV=2	#CQTPIK	NA	1	NA	0.89	NA	0.89	NA	NA
Q13510	143	ASAH1	ASAH1_C143	ASAH1_HUMAN Acid ceramidase OS=Homo sapiens OX=9606 GN=ASAH1 PE=1 SV=5	#CTSIVAEDKK	NA	1	NA	0.89	NA	0.89	NA	NA
Q9P003	32	CNIH4	CNIH4_C32	CNIH4_HUMAN Protein cornichon homolog 4 OS=Homo sapiens OX=9606 GN=CNIH4 PE=1 SV=1	NA	#CDYINAR	NA	1	NA	0.89	0.89	NA	NA
Q16831	131	UPP1	UPP1_C131	UPP1_HUMAN Uridine phosphorylase 1 OS=Homo sapiens OX=9606 GN=UPP1 PE=1 SV=1	NA	#CSNVTIIR	NA	1	NA	0.89	0.89	NA	NA
Q9NRX1	64	PNO1	PNO1_C64	PNO1_HUMAN RNA-binding protein PNO1 OS=Homo sapiens OX=9606 GN=PNO1 PE=1 SV=1	NA	#CGDGLLSGK	NA	2	NA	0.89	0.89	NA	NA
Q9UPN3	6312	MACF1	MACF1_C6312	MACF1_HUMAN Microtubule-actin cross-linking factor 1, isoforms 1/2/3/5 OS=Homo sapiens OX=9606 GN=MACF1 PE=1 SV=4	NA	#CWESVLQK	NA	1	NA	0.89	0.89	NA	NA
P31949	91	S100A11	S100A11_C91	S10AB_HUMAN Protein S100-A11 OS=Homo sapiens OX=9606 GN=S100A11 PE=1 SV=2	#CHDSFLK	#CHDSFLK	4	5	0.965	0.81	0.8875	0.109602	12.3495
Q1KMD3	602	HNRNPUL2	HNRNPUL2_C602	HNRL2_HUMAN Heterogeneous nuclear ribonucleoprotein U-like protein 2 OS=Homo sapiens OX=9606 GN=HNRNPUL2 PE=1 SV=1	#CDYMDEVTYGELEK #CDYMDEVTYGELEKEEAQPIVTK	#CDYMDEVTYGELEK	3	2	0.78	0.995	0.8875	0.152028	17.1299
Q9BRP1	100	PDCD2L	PDCD2L_C100	PDD2L_HUMAN Programmed cell death protein 2-like OS=Homo sapiens OX=9606 GN=PDCD2L PE=1 SV=1	#CLQVPER	#CLQVPER	3	2	0.97	0.8	0.885	0.120208	13.5828
Q14789	1257	GOLGB1	GOLGB1_C1257	GOGB1_HUMAN Golgin subfamily B member 1 OS=Homo sapiens OX=9606 GN=GOLGB1 PE=1 SV=2	#CSSTPGLEEPLFK	#CSSTPGLEEPLFK	2	1	0.97	0.8	0.885	0.120208	13.5828
P21333	2160	FLNA	FLNA_C2160	FLNA_HUMAN Filamin-A OS=Homo sapiens OX=9606 GN=FLNA PE=1 SV=4	#CDLSLK	#CDLSLK	2	1	0.87	0.9	0.885	0.0212132	2.39697
P23396	119	RPS3	RPS3_C119	RS3_HUMAN 40S ribosomal protein S3 OS=Homo sapiens OX=9606 GN=RPS3 PE=1 SV=2	#CYGVLR	#CYGVLR	1	1	0.84	0.93	0.885	0.0636396	7.19092
P63010	129	AP2B1	AP2B1_C129	AP2B1_HUMAN AP-2 complex subunit beta OS=Homo sapiens OX=9606 GN=AP2B1 PE=1 SV=1	#CLKDEDPYVR	#CLKDEDPYVR	2	2	0.625	1.14	0.8825	0.36416	41.2646
P09622	80	DLD	DLD_C80	DLDH_HUMAN Dihydrolipoyl dehydrogenase, mitochondrial OS=Homo sapiens OX=9606 GN=DLD PE=1 SV=2	#CLNVGCIPSK	#CLNVGCIPSK	2	1	0.93	0.83	0.88	0.0707107	8.0353
P11413	269	G6PD	G6PD_C269	G6PD_HUMAN Glucose-6-phosphate 1-dehydrogenase OS=Homo sapiens OX=9606 GN=G6PD PE=1 SV=4	#CLVAMEK #CLVAMEKPASTN #CLVAMEKPASTNSDDVR	#CLVAMEK #CLVAMEKPASTN	7	5	0.91	0.85	0.88	0.0424264	4.82118
P42858	2526	HTT	HTT_C2526	HD_HUMAN Huntingtin OS=Homo sapiens OX=9606 GN=HTT PE=1 SV=2	#CLEQQPR	NA	3	NA	0.88	NA	0.88	NA	NA
Q02040	549	AKAP17A	AKAP17A_C549	AK17A_HUMAN A-kinase anchor protein 17A OS=Homo sapiens OX=9606 GN=AKAP17A PE=1 SV=2	#CIPDNNQQPK	#CIPDNNQQPK	1	2	0.88	0.88	0.88	0	0
Q6P2E9	249	EDC4	EDC4_C249	EDC4_HUMAN Enhancer of mRNA-decapping protein 4 OS=Homo sapiens OX=9606 GN=EDC4 PE=1 SV=1	#CEESSPTVALLHEDR	NA	1	NA	0.88	NA	0.88	NA	NA
Q9H9B4	284	SFXN1	SFXN1_C284	SFXN1_HUMAN Sideroflexin-1 OS=Homo sapiens OX=9606 GN=SFXN1 PE=1 SV=4	#CALFPQK	#CALFPQK	2	3	0.88	0.88	0.88	0	0
Q99661	287	KIF2C	KIF2C_C287	KIF2C_HUMAN Kinesin-like protein KIF2C OS=Homo sapiens OX=9606 GN=KIF2C PE=1 SV=2	#CLLLVHEPK	NA	1	NA	0.88	NA	0.88	NA	NA
Q99613	443	EIF3C	EIF3C_C443	EIF3C_HUMAN Eukaryotic translation initiation factor 3 subunit C OS=Homo sapiens OX=9606 GN=EIF3C PE=1 SV=1	#CILTLVER	#CILTLVER	2	2	0.88	0.88	0.88	0	0
Q9BRX2	258	PELO	PELO_C258	PELO_HUMAN Protein pelota homolog OS=Homo sapiens OX=9606 GN=PELO PE=1 SV=2	#CDPTVASR	NA	1	NA	0.88	NA	0.88	NA	NA
Q9C0D5	1808	TANC1	TANC1_C1808	TANC1_HUMAN Protein TANC1 OS=Homo sapiens OX=9606 GN=TANC1 PE=1 SV=3	#CQIPVHSQENR	NA	1	NA	0.88	NA	0.88	NA	NA
P30260	156	CDC27	CDC27_C156	CDC27_HUMAN Cell division cycle protein 27 homolog OS=Homo sapiens OX=9606 GN=CDC27 PE=1 SV=2	NA	#CEIGEKPDPDQTFK	NA	1	NA	0.88	0.88	NA	NA
Q9Y6C9	79	MTCH2	MTCH2_C79	MTCH2_HUMAN Mitochondrial carrier homolog 2 OS=Homo sapiens OX=9606 GN=MTCH2 PE=1 SV=1	NA	#CSGVLGTVVHGK	NA	2	NA	0.88	0.88	NA	NA
O96013	58	PAK4	PAK4_C58	PAK4_HUMAN Serine/threonine-protein kinase PAK 4 OS=Homo sapiens OX=9606 GN=PAK4 PE=1 SV=1	NA	#CITSIQPGAPK	NA	3	NA	0.88	0.88	NA	NA
O14936	698	CASK	CASK_C698	CSKP_HUMAN Peripheral plasma membrane protein CASK OS=Homo sapiens OX=9606 GN=CASK PE=1 SV=3	NA	#CTWFGK	NA	1	NA	0.88	0.88	NA	NA
Q15166	283	PON3	PON3_C283	PON3_HUMAN Serum paraoxonase/lactonase 3 OS=Homo sapiens OX=9606 GN=PON3 PE=1 SV=3	NA	#CHPNPMK	NA	2	NA	0.88	0.88	NA	NA
O75369	769	FLNB	FLNB_C769	FLNB_HUMAN Filamin-B OS=Homo sapiens OX=9606 GN=FLNB PE=1 SV=2	#CTEAGEGDVSVGIK	#CTEAGEGDVSVGIK	2	2	0.865	0.89	0.8775	0.0176777	2.01455
P46779	13	RPL28	RPL28_C13	RL28_HUMAN 60S ribosomal protein L28 OS=Homo sapiens OX=9606 GN=RPL28 PE=1 SV=3	#CSSFLIK	#CSSFLIK	2	2	0.765	0.99	0.8775	0.159099	18.1309
Q9Y678	129	COPG1	COPG1_C129	COPG1_HUMAN Coatomer subunit gamma-1 OS=Homo sapiens OX=9606 GN=COPG1 PE=1 SV=1	#CQITDSTMLQAIER	#CQITDSTMLQAIER	2	2	1.07	0.68	0.875	0.275772	31.5168
O43390	292	HNRNPR	HNRNPR_C292	HNRPR_HUMAN Heterogeneous nuclear ribonucleoprotein R OS=Homo sapiens OX=9606 GN=HNRNPR PE=1 SV=1	#CFLEYEDHK	#CFLEYEDHK	2	1	0.88	0.87	0.875	0.00707107	0.808122
P63096	305	GNAI1	GNAI1_C305	GNAI1_HUMAN Guanine nucleotide-binding protein G(i) subunit alpha-1 OS=Homo sapiens OX=9606 GN=GNAI1 PE=1 SV=2	#CQFEDLNK	#CQFEDLNK	2	1	0.7	1.05	0.875	0.247487	28.2843
O60269	143	GPRIN2	GPRIN2_C143	GRIN2_HUMAN G protein-regulated inducer of neurite outgrowth 2 OS=Homo sapiens OX=9606 GN=GPRIN2 PE=1 SV=2	#CSALGSSPVHR	NA	1	NA	0.87	NA	0.87	NA	NA
Q709C8	3723	VPS13C	VPS13C_C3723	VP13C_HUMAN Vacuolar protein sorting-associated protein 13C OS=Homo sapiens OX=9606 GN=VPS13C PE=1 SV=1	#CNAIEDAQSTR	NA	1	NA	0.87	NA	0.87	NA	NA
O76031	538	CLPX	CLPX_C538	CLPX_HUMAN ATP-dependent Clp protease ATP-binding subunit clpX-like, mitochondrial OS=Homo sapiens OX=9606 GN=CLPX PE=1 SV=2	#CELNVTEDALK	NA	2	NA	0.87	NA	0.87	NA	NA
P78527	3683	PRKDC	PRKDC_C3683	PRKDC_HUMAN DNA-dependent protein kinase catalytic subunit OS=Homo sapiens OX=9606 GN=PRKDC PE=1 SV=3	#CSPWMSDFK	NA	2	NA	0.87	NA	0.87	NA	NA
O75044	370	SRGAP2	SRGAP2_C370	SRGP2_HUMAN SLIT-ROBO Rho GTPase-activating protein 2 OS=Homo sapiens OX=9606 GN=SRGAP2 PE=1 SV=3	#CQQLQSR	NA	1	NA	0.87	NA	0.87	NA	NA
O94842	577	TOX4	TOX4_C577	TOX4_HUMAN TOX high mobility group box family member 4 OS=Homo sapiens OX=9606 GN=TOX4 PE=1 SV=1	NA	#CENPPIVSK	NA	1	NA	0.87	0.87	NA	NA
Q9Y4I1	535	MYO5A	MYO5A_C535	MYO5A_HUMAN Unconventional myosin-Va OS=Homo sapiens OX=9606 GN=MYO5A PE=1 SV=2	NA	#CALFEKPR	NA	1	NA	0.87	0.87	NA	NA
P21333	1225	FLNA	FLNA_C1225	FLNA_HUMAN Filamin-A OS=Homo sapiens OX=9606 GN=FLNA PE=1 SV=4	NA	#CPGAYTVTIK	NA	1	NA	0.87	0.87	NA	NA
Q9NP92	316	MRPS30	MRPS30_C316	RT30_HUMAN 39S ribosomal protein S30, mitochondrial OS=Homo sapiens OX=9606 GN=MRPS30 PE=1 SV=2	NA	#CADQIEVVFR	NA	1	NA	0.87	0.87	NA	NA
P42704	930	LRPPRC	LRPPRC_C930	LPPRC_HUMAN Leucine-rich PPR motif-containing protein, mitochondrial OS=Homo sapiens OX=9606 GN=LRPPRC PE=1 SV=3	#CVANNQVETLEK	#CVANNQVETLEK	4	3	0.805	0.93	0.8675	0.0883883	10.1889
P49790	21	NUP153	NUP153_C21	NU153_HUMAN Nuclear pore complex protein Nup153 OS=Homo sapiens OX=9606 GN=NUP153 PE=1 SV=2	#CHQGPIKPY	#CHQGPIKPY	3	3	0.9	0.83	0.865	0.0494975	5.72225
O00186	159	STXBP3	STXBP3_C159	STXB3_HUMAN Syntaxin-binding protein 3 OS=Homo sapiens OX=9606 GN=STXBP3 PE=1 SV=2	#CYSPDPGNAK	#CYSPDPGNAK	2	2	0.85	0.88	0.865	0.0212132	2.45239
P55209	88	NAP1L1	NAP1L1_C88	NP1L1_HUMAN Nucleosome assembly protein 1-like 1 OS=Homo sapiens OX=9606 GN=NAP1L1 PE=1 SV=1	#CAQIEAK	#CAQIEAK	2	2	0.83	0.9	0.865	0.0494975	5.72225
P26640	41	VARS	VARS_C41	SYVC_HUMAN Valine--tRNA ligase OS=Homo sapiens OX=9606 GN=VARS PE=1 SV=4	#CLQPPPTSR	#CLQPPPTSR	2	3	0.82	0.91	0.865	0.0636396	7.35718
Q14573	1638	ITPR3	ITPR3_C1638	ITPR3_HUMAN Inositol 1,4,5-trisphosphate receptor type 3 OS=Homo sapiens OX=9606 GN=ITPR3 PE=1 SV=2	#CESGGFLSK	#CESGGFLSK	1	3	0.58	1.15	0.865	0.403051	46.5955
Q14152	78	EIF3A	EIF3A_C78	EIF3A_HUMAN Eukaryotic translation initiation factor 3 subunit A OS=Homo sapiens OX=9606 GN=EIF3A PE=1 SV=1	#CQQVNIK	#CQQVNIK	1	1	1.12	0.6	0.86	0.367696	42.7553
P40763	687	STAT3	STAT3_C687	STAT3_HUMAN Signal transducer and activator of transcription 3 OS=Homo sapiens OX=9606 GN=STAT3 PE=1 SV=2	#CRPESQEHPEADPGSAAPY #CRPESQEHPEADPGSAAPYLK	#CRPESQEHPEADPGSAAPYLK	2	2	0.88	0.84	0.86	0.0282843	3.28887
Q5JWF2	1008	GNAS	GNAS_C1008	GNAS1_HUMAN Guanine nucleotide-binding protein G(s) subunit alpha isoforms XLas OS=Homo sapiens OX=9606 GN=GNAS PE=1 SV=2	#CAVDTENIR	NA	1	NA	0.86	NA	0.86	NA	NA
O43264	404	ZW10	ZW10_C404	ZW10_HUMAN Centromere/kinetochore protein zw10 homolog OS=Homo sapiens OX=9606 GN=ZW10 PE=1 SV=3	#CQDVIVAAR	NA	3	NA	0.86	NA	0.86	NA	NA
Q9Y2L1	799	DIS3	DIS3_C799	RRP44_HUMAN Exosome complex exonuclease RRP44 OS=Homo sapiens OX=9606 GN=DIS3 PE=1 SV=2	#CTYPELTDK	NA	2	NA	0.86	NA	0.86	NA	NA
P12955	82	PEPD	PEPD_C82	PEPD_HUMAN Xaa-Pro dipeptidase OS=Homo sapiens OX=9606 GN=PEPD PE=1 SV=3	#CYGVIDVDTGK	NA	1	NA	0.86	NA	0.86	NA	NA
P56192	287	MARS	MARS_C287	SYMC_HUMAN Methionine--tRNA ligase, cytoplasmic OS=Homo sapiens OX=9606 GN=MARS PE=1 SV=2	#CVLSADVFAR	NA	1	NA	0.86	NA	0.86	NA	NA
O00410	266	IPO5	IPO5_C266	IPO5_HUMAN Importin-5 OS=Homo sapiens OX=9606 GN=IPO5 PE=1 SV=4	#CGDTSLNNMQR	NA	1	NA	0.86	NA	0.86	NA	NA
Q9HC52	261	CBX8	CBX8_C261	CBX8_HUMAN Chromobox protein homolog 8 OS=Homo sapiens OX=9606 GN=CBX8 PE=1 SV=3	#CGVTSPSSAEATGK	NA	1	NA	0.86	NA	0.86	NA	NA
O60921	253	HUS1	HUS1_C253	HUS1_HUMAN Checkpoint protein HUS1 OS=Homo sapiens OX=9606 GN=HUS1 PE=1 SV=1	#CNIVNNK	NA	1	NA	0.86	NA	0.86	NA	NA
P50395	202	GDI2	GDI2_C202	GDIB_HUMAN Rab GDP dissociation inhibitor beta OS=Homo sapiens OX=9606 GN=GDI2 PE=1 SV=2	NA	#CYETINR	NA	2	NA	0.86	0.86	NA	NA
Q9NW82	430	WDR70	WDR70_C430	WDR70_HUMAN WD repeat-containing protein 70 OS=Homo sapiens OX=9606 GN=WDR70 PE=1 SV=1	NA	#CFSPDDK	NA	2	NA	0.86	0.86	NA	NA
O75116	607	ROCK2	ROCK2_C607	ROCK2_HUMAN Rho-associated protein kinase 2 OS=Homo sapiens OX=9606 GN=ROCK2 PE=1 SV=4	NA	#CLLETAK	NA	1	NA	0.86	0.86	NA	NA
Q9NS91	64	RAD18	RAD18_C64	RAD18_HUMAN E3 ubiquitin-protein ligase RAD18 OS=Homo sapiens OX=9606 GN=RAD18 PE=1 SV=2	NA	#CVTVTEPDLK	NA	1	NA	0.86	0.86	NA	NA
Q5JU85	711	IQSEC2	IQSEC2_C711	IQEC2_HUMAN IQ motif and SEC7 domain-containing protein 2 OS=Homo sapiens OX=9606 GN=IQSEC2 PE=1 SV=2	NA	#CSSGSSSR	NA	1	NA	0.86	0.86	NA	NA
Q32P28	483	P3H1	P3H1_C483	P3H1_HUMAN Prolyl 3-hydroxylase 1 OS=Homo sapiens OX=9606 GN=P3H1 PE=1 SV=2	NA	#CQELQR	NA	2	NA	0.86	0.86	NA	NA
Q6PKG0	864	LARP1	LARP1_C864	LARP1_HUMAN La-related protein 1 OS=Homo sapiens OX=9606 GN=LARP1 PE=1 SV=2	#CTPQSLPK	#CTPQSLPK	2	2	0.855	0.86	0.8575	0.00353553	0.412307
Q27J81	394	INF2	INF2_C394	INF2_HUMAN Inverted formin-2 OS=Homo sapiens OX=9606 GN=INF2 PE=1 SV=2	#CEPVDHAQSESILK	#CEPVDHAQSESILK	5	2	0.87	0.84	0.855	0.0212132	2.48108
P02545	570	LMNA	LMNA_C570	LMNA_HUMAN Prelamin-A/C OS=Homo sapiens OX=9606 GN=LMNA PE=1 SV=1	#CSSSGDPAEYNLR	#CSSSGDPAEYNLR	5	4	0.85	0.86	0.855	0.00707107	0.827025
O75369	622	FLNB	FLNB_C622	FLNB_HUMAN Filamin-B OS=Homo sapiens OX=9606 GN=FLNB PE=1 SV=2	#CDDEDIKDSPYMAF	#CDDEDIKDSPY #CDDEDIKDSPYMAF	5	8	0.84	0.865	0.8525	0.0176777	2.07363
Q9NTJ3	110	SMC4	SMC4_C110	SMC4_HUMAN Structural maintenance of chromosomes protein 4 OS=Homo sapiens OX=9606 GN=SMC4 PE=1 SV=2	#CIIGPNGSGK	NA	2	NA	0.85	NA	0.85	NA	NA
Q9H223	141	EHD4	EHD4_C141	EHD4_HUMAN EH domain-containing protein 4 OS=Homo sapiens OX=9606 GN=EHD4 PE=1 SV=1	#CSQLPNQVLK	NA	2	NA	0.85	NA	0.85	NA	NA
Q7Z4R8	99	C6orf120	C6orf120_C99	CF120_HUMAN UPF0669 protein C6orf120 OS=Homo sapiens OX=9606 GN=C6orf120 PE=1 SV=1	#CGPDAVSIPAHFR	NA	1	NA	0.85	NA	0.85	NA	NA
P13489	209	RNH1	RNH1_C209	RINI_HUMAN Ribonuclease inhibitor OS=Homo sapiens OX=9606 GN=RNH1 PE=1 SV=2	#CGVTSDNCR	NA	2	NA	0.85	NA	0.85	NA	NA
Q96JB5	136	CDK5RAP3	CDK5RAP3_C136	CK5P3_HUMAN CDK5 regulatory subunit-associated protein 3 OS=Homo sapiens OX=9606 GN=CDK5RAP3 PE=1 SV=2	NA	#CQQLQQEYSR	NA	2	NA	0.85	0.85	NA	NA
P15924	367	DSP	DSP_C367	DESP_HUMAN Desmoplakin OS=Homo sapiens OX=9606 GN=DSP PE=1 SV=3	NA	#CIDVHLK	NA	1	NA	0.85	0.85	NA	NA
Q13415	186	ORC1	ORC1_C186	ORC1_HUMAN Origin recognition complex subunit 1 OS=Homo sapiens OX=9606 GN=ORC1 PE=1 SV=2	NA	#CQKPVR	NA	1	NA	0.85	0.85	NA	NA
Q9H0L4	150	CSTF2T	CSTF2T_C150	CSTFT_HUMAN Cleavage stimulation factor subunit 2 tau variant OS=Homo sapiens OX=9606 GN=CSTF2T PE=1 SV=1	NA	#CVQNSHQEAR	NA	1	NA	0.85	0.85	NA	NA
Q8N9N5	48	BANP	BANP_C48	BANP_HUMAN Protein BANP OS=Homo sapiens OX=9606 GN=BANP PE=1 SV=3	NA	#CQDPSIK	NA	1	NA	0.85	0.85	NA	NA
P07942	739	LAMB1	LAMB1_C739	LAMB1_HUMAN Laminin subunit beta-1 OS=Homo sapiens OX=9606 GN=LAMB1 PE=1 SV=2	NA	#CLENSR	NA	1	NA	0.85	0.85	NA	NA
Q13772	184	NCOA4	NCOA4_C184	NCOA4_HUMAN Nuclear receptor coactivator 4 OS=Homo sapiens OX=9606 GN=NCOA4 PE=1 SV=1	#CISMPEQK	#CISMPEQK	3	2	0.93	0.765	0.8475	0.116673	13.7667
P49321	708	NASP	NASP_C708	NASP_HUMAN Nuclear autoantigenic sperm protein OS=Homo sapiens OX=9606 GN=NASP PE=1 SV=2	#CVTDISHLVR	#CVTDISHLVR	3	2	0.97	0.725	0.8475	0.173241	20.4414
Q01082	604	SPTBN1	SPTBN1_C604	SPTB2_HUMAN Spectrin beta chain, non-erythrocytic 1 OS=Homo sapiens OX=9606 GN=SPTBN1 PE=1 SV=2	#CDPQVIR	#CDPQVIR	3	2	0.72	0.975	0.8475	0.180312	21.2758
P62937	62	PPIA	PPIA_C62	PPIA_HUMAN Peptidyl-prolyl cis-trans isomerase A OS=Homo sapiens OX=9606 GN=PPIA PE=1 SV=2	#CQGGDFTR	#CQGGDFTR	2	2	0.85	0.84	0.845	0.00707107	0.836813
Q96A33	215	CCDC47	CCDC47_C215	CCD47_HUMAN Coiled-coil domain-containing protein 47 OS=Homo sapiens OX=9606 GN=CCDC47 PE=1 SV=1	#CEGMLIQLR	#CEGMLIQLR	1	1	0.78	0.91	0.845	0.0919239	10.8786
P46013	824	MKI67	MKI67_C824	KI67_HUMAN Proliferation marker protein Ki-67 OS=Homo sapiens OX=9606 GN=MKI67 PE=1 SV=2	#CSASPPLR	#CSASPPLR	3	2	0.71	0.98	0.845	0.190919	22.5939
P40763	251	STAT3	STAT3_C251	STAT3_HUMAN Signal transducer and activator of transcription 3 OS=Homo sapiens OX=9606 GN=STAT3 PE=1 SV=2	#CIGGPPNICLDR	#CIGGPPNICLDR	6	1	0.865	0.82	0.8425	0.0318198	3.77683
P62333	170	PSMC6	PSMC6_C170	PRS10_HUMAN 26S proteasome regulatory subunit 10B OS=Homo sapiens OX=9606 GN=PSMC6 PE=1 SV=1	#CLLYGPPGTGK	#CLLYGPPGTGK	2	1	0.85	0.83	0.84	0.0141421	1.68359
Q9BY32	33	ITPA	ITPA_C33	ITPA_HUMAN Inosine triphosphate pyrophosphatase OS=Homo sapiens OX=9606 GN=ITPA PE=1 SV=2	#CTLVAQK	NA	1	NA	0.84	NA	0.84	NA	NA
Q8TEQ6	973	GEMIN5	GEMIN5_C973	GEMI5_HUMAN Gem-associated protein 5 OS=Homo sapiens OX=9606 GN=GEMIN5 PE=1 SV=3	#CFQDQYVK	NA	1	NA	0.84	NA	0.84	NA	NA
Q96SI9	218	STRBP	STRBP_C218	STRBP_HUMAN Spermatid perinuclear RNA-binding protein OS=Homo sapiens OX=9606 GN=STRBP PE=1 SV=1	#CVIVIR	NA	3	NA	0.84	NA	0.84	NA	NA
A0A0B4J2D5	177	GATD3B	GATD3B_C177	GAL3B_HUMAN Glutamine amidotransferase-like class 1 domain-containing protein 3B, mitochondrial OS=Homo sapiens OX=9606 GN=GATD3B PE=1 SV=1	#CIAPVLAAK	NA	2	NA	0.84	NA	0.84	NA	NA
Q01581	224	HMGCS1	HMGCS1_C224	HMCS1_HUMAN Hydroxymethylglutaryl-CoA synthase, cytoplasmic OS=Homo sapiens OX=9606 GN=HMGCS1 PE=1 SV=2	#CYLSALDR	NA	1	NA	0.84	NA	0.84	NA	NA
Q9Y2G3	1144	ATP11B	ATP11B_C1144	AT11B_HUMAN Probable phospholipid-transporting ATPase IF OS=Homo sapiens OX=9606 GN=ATP11B PE=1 SV=2	#CSPTHISR	NA	1	NA	0.84	NA	0.84	NA	NA
O75165	904	DNAJC13	DNAJC13_C904	DJC13_HUMAN DnaJ homolog subfamily C member 13 OS=Homo sapiens OX=9606 GN=DNAJC13 PE=1 SV=5	#CTDKLER	NA	1	NA	0.84	NA	0.84	NA	NA
Q14789	1811	GOLGB1	GOLGB1_C1811	GOGB1_HUMAN Golgin subfamily B member 1 OS=Homo sapiens OX=9606 GN=GOLGB1 PE=1 SV=2	#CSESVPSAK	NA	1	NA	0.84	NA	0.84	NA	NA
P41252	87	IARS	IARS_C87	SYIC_HUMAN Isoleucine--tRNA ligase, cytoplasmic OS=Homo sapiens OX=9606 GN=IARS PE=1 SV=2	#CHGLPVEYEIDK	#CHGLPVEYEIDK	2	2	0.83	0.85	0.84	0.0141421	1.68359
P17987	147	TCP1	TCP1_C147	TCPA_HUMAN T-complex protein 1 subunit alpha OS=Homo sapiens OX=9606 GN=TCP1 PE=1 SV=1	NA	#CLINAAK	NA	1	NA	0.84	0.84	NA	NA
Q9UFF9	67	CNOT8	CNOT8_C67	CNOT8_HUMAN CCR4-NOT transcription complex subunit 8 OS=Homo sapiens OX=9606 GN=CNOT8 PE=1 SV=1	NA	#CNVDLLK	NA	1	NA	0.84	0.84	NA	NA
P59998	21	ARPC4	ARPC4_C21	ARPC4_HUMAN Actin-related protein 2/3 complex subunit 4 OS=Homo sapiens OX=9606 GN=ARPC4 PE=1 SV=3	NA	#CLENFSSQVVER	NA	2	NA	0.84	0.84	NA	NA
Q92896	639	GLG1	GLG1_C639	GSLG1_HUMAN Golgi apparatus protein 1 OS=Homo sapiens OX=9606 GN=GLG1 PE=1 SV=2	NA	#CLIDLGK	NA	2	NA	0.84	0.84	NA	NA
P17252	78	PRKCA	PRKCA_C78	KPCA_HUMAN Protein kinase C alpha type OS=Homo sapiens OX=9606 GN=PRKCA PE=1 SV=4	NA	#CHEFVTF	NA	1	NA	0.84	0.84	NA	NA
Q9NX40	38	OCIAD1	OCIAD1_C38	OCAD1_HUMAN OCIA domain-containing protein 1 OS=Homo sapiens OX=9606 GN=OCIAD1 PE=1 SV=1	NA	#CNDESFWFR	NA	2	NA	0.84	0.84	NA	NA
P00533	31	EGFR	EGFR_C31	EGFR_HUMAN Epidermal growth factor receptor OS=Homo sapiens OX=9606 GN=EGFR PE=1 SV=2	NA	#CQGTSNK	NA	1	NA	0.84	0.84	NA	NA
Q9P2D3	870	HEATR5B	HEATR5B_C870	HTR5B_HUMAN HEAT repeat-containing protein 5B OS=Homo sapiens OX=9606 GN=HEATR5B PE=1 SV=2	NA	#CAAGEALGR	NA	2	NA	0.84	0.84	NA	NA
Q01780	555	EXOSC10	EXOSC10_C555	EXOSX_HUMAN Exosome component 10 OS=Homo sapiens OX=9606 GN=EXOSC10 PE=1 SV=2	#CNPVPPLVR	#CNPVPPLVR	2	1	0.91	0.76	0.835	0.106066	12.7025
P09234	9	SNRPC	SNRPC_C9	RU1C_HUMAN U1 small nuclear ribonucleoprotein C OS=Homo sapiens OX=9606 GN=SNRPC PE=1 SV=1	#CDTYLTHDSPSVR	#CDTYLTHDSPSVR	1	2	0.79	0.88	0.835	0.0636396	7.62151
Q8NC60	150	NOA1	NOA1_C150	NOA1_HUMAN Nitric oxide-associated protein 1 OS=Homo sapiens OX=9606 GN=NOA1 PE=1 SV=2	#CQDAGVPGYLPR	#CQDAGVPGYLPR	2	4	0.71	0.96	0.835	0.176777	21.1709
P53621	522	COPA	COPA_C522	COPA_HUMAN Coatomer subunit alpha OS=Homo sapiens OX=9606 GN=COPA PE=1 SV=2	#CNIHENIR	#CNIHENIR	2	2	0.62	1.05	0.835	0.304056	36.4139
Q9NQR4	97	NIT2	NIT2_C97	NIT2_HUMAN Omega-amidase NIT2 OS=Homo sapiens OX=9606 GN=NIT2 PE=1 SV=1	#CAVFGPDGTLLAK	#CAVFGPDGTLLAK	2	2	0.92	0.74	0.83	0.127279	15.3348
Q9BUF5	12	TUBB6	TUBB6_C12	TBB6_HUMAN Tubulin beta-6 chain OS=Homo sapiens OX=9606 GN=TUBB6 PE=1 SV=1	#CGNQIGTK	#CGNQIGTK	1	1	0.88	0.78	0.83	0.0707107	8.51936
O15173	159	PGRMC2	PGRMC2_C159	PGRC2_HUMAN Membrane-associated progesterone receptor component 2 OS=Homo sapiens OX=9606 GN=PGRMC2 PE=1 SV=1	#CLDKDALR	#CLDKDALR	1	1	0.61	1.05	0.83	0.311127	37.4852
Q12874	274	SF3A3	SF3A3_C274	SF3A3_HUMAN Splicing factor 3A subunit 3 OS=Homo sapiens OX=9606 GN=SF3A3 PE=1 SV=1	#CGGTLEER	#CGGTLEER	1	1	0.84	0.82	0.83	0.0141421	1.70387
Q9Y490	1939	TLN1	TLN1_C1939	TLN1_HUMAN Talin-1 OS=Homo sapiens OX=9606 GN=TLN1 PE=1 SV=3	#CSPSDAYTK	#CSPSDAYTK	4	3	0.84	0.82	0.83	0.0141421	1.70387
O75369	2115	FLNB	FLNB_C2115	FLNB_HUMAN Filamin-B OS=Homo sapiens OX=9606 GN=FLNB PE=1 SV=2	#CDLNLK	NA	1	NA	0.83	NA	0.83	NA	NA
Q6IA69	531	NADSYN1	NADSYN1_C531	NADE_HUMAN Glutamine-dependent NAD(+) synthetase OS=Homo sapiens OX=9606 GN=NADSYN1 PE=1 SV=3	#CSSADINPIGGISK	NA	2	NA	0.83	NA	0.83	NA	NA
O75153	753	CLUH	CLUH_C753	CLU_HUMAN Clustered mitochondria protein homolog OS=Homo sapiens OX=9606 GN=CLUH PE=1 SV=2	#CQIPGLVK	NA	1	NA	0.83	NA	0.83	NA	NA
Q86U44	336	METTL3	METTL3_C336	MTA70_HUMAN N6-adenosine-methyltransferase catalytic subunit OS=Homo sapiens OX=9606 GN=METTL3 PE=1 SV=2	#CMDSEAPGSK	NA	1	NA	0.83	NA	0.83	NA	NA
Q15054	137	POLD3	POLD3_C137	DPOD3_HUMAN DNA polymerase delta subunit 3 OS=Homo sapiens OX=9606 GN=POLD3 PE=1 SV=2	#CAAAVPR	NA	2	NA	0.83	NA	0.83	NA	NA
Q96MY1	111	NOL4L	NOL4L_C111	NOL4L_HUMAN Nucleolar protein 4-like OS=Homo sapiens OX=9606 GN=NOL4L PE=1 SV=2	#CGADGLR	NA	1	NA	0.83	NA	0.83	NA	NA
P48449	471	LSS	LSS_C471	ERG7_HUMAN Lanosterol synthase OS=Homo sapiens OX=9606 GN=LSS PE=1 SV=1	#CPHVTEHIPR	NA	1	NA	0.83	NA	0.83	NA	NA
Q9H0C8	301	ILKAP	ILKAP_C301	ILKAP_HUMAN Integrin-linked kinase-associated serine/threonine phosphatase 2C OS=Homo sapiens OX=9606 GN=ILKAP PE=1 SV=1	NA	#CGVTSVPDIR	NA	2	NA	0.83	0.83	NA	NA
Q9NR30	291	DDX21	DDX21_C291	DDX21_HUMAN Nucleolar RNA helicase 2 OS=Homo sapiens OX=9606 GN=DDX21 PE=1 SV=5	NA	#CFYGGTPYGGQFER	NA	2	NA	0.83	0.83	NA	NA
P20810	241	CAST	CAST_C241	ICAL_HUMAN Calpastatin OS=Homo sapiens OX=9606 GN=CAST PE=1 SV=4	NA	#CGSPTAAGK	NA	3	NA	0.83	0.83	NA	NA
Q9ULX6	211	AKAP8L	AKAP8L_C211	AKP8L_HUMAN A-kinase anchor protein 8-like OS=Homo sapiens OX=9606 GN=AKAP8L PE=1 SV=4	NA	#CMSGASR	NA	1	NA	0.83	0.83	NA	NA
O60701	288	UGDH	UGDH_C288	UGDH_HUMAN UDP-glucose 6-dehydrogenase OS=Homo sapiens OX=9606 GN=UGDH PE=1 SV=1	#CEALNLPEVAR	#CEALNLPEVAR	3	2	0.89	0.765	0.8275	0.0883883	10.6814
Q86VP6	356	CAND1	CAND1_C356	CAND1_HUMAN Cullin-associated NEDD8-dissociated protein 1 OS=Homo sapiens OX=9606 GN=CAND1 PE=1 SV=2	#CLDAVVSTR	#CLDAVVSTR	2	1	1.13	0.52	0.825	0.431335	52.283
O00148	164	DDX39A	DDX39A_C164	DX39A_HUMAN ATP-dependent RNA helicase DDX39A OS=Homo sapiens OX=9606 GN=DDX39A PE=1 SV=2	#CPHVVVGTPGR	#CPHVVVGTPGR	1	1	0.68	0.97	0.825	0.205061	24.8559
Q6IQ49	415	SDE2	SDE2_C415	SDE2_HUMAN Replication stress response regulator SDE2 OS=Homo sapiens OX=9606 GN=SDE2 PE=1 SV=1	#CGGTLQER	#CGGTLQER	1	1	0.96	0.68	0.82	0.19799	24.1451
P33527	1423	ABCC1	ABCC1_C1423	MRP1_HUMAN Multidrug resistance-associated protein 1 OS=Homo sapiens OX=9606 GN=ABCC1 PE=1 SV=3	#CAEGGENLSVGQR	#CAEGGENLSVGQR	1	2	0.84	0.8	0.82	0.0282843	3.4493
P14618	474	PKM	PKM_C474	KPYM_HUMAN Pyruvate kinase PKM OS=Homo sapiens OX=9606 GN=PKM PE=1 SV=4	#CKDPVQEAW #CKDPVQEAWAE #CKDPVQEAWAEDVDLR	#CKDPVQEAWAE #CKDPVQEAWAEDVDLR	7	5	0.81	0.83	0.82	0.0141421	1.72465
Q92616	1235	GCN1	GCN1_C1235	GCN1_HUMAN eIF-2-alpha kinase activator GCN1 OS=Homo sapiens OX=9606 GN=GCN1 PE=1 SV=6	#CGLALALNK	#CGLALALNK	1	4	0.79	0.85	0.82	0.0424264	5.17395
P57740	369	NUP107	NUP107_C369	NU107_HUMAN Nuclear pore complex protein Nup107 OS=Homo sapiens OX=9606 GN=NUP107 PE=1 SV=1	#CGQAWR	NA	1	NA	0.82	NA	0.82	NA	NA
Q14764	59	MVP	MVP_C59	MVP_HUMAN Major vault protein OS=Homo sapiens OX=9606 GN=MVP PE=1 SV=4	#CTVANPVSR	NA	1	NA	0.82	NA	0.82	NA	NA
Q3KQU3	251	MAP7D1	MAP7D1_C251	MA7D1_HUMAN MAP7 domain-containing protein 1 OS=Homo sapiens OX=9606 GN=MAP7D1 PE=1 SV=1	#CSVSAVNLPK	NA	2	NA	0.82	NA	0.82	NA	NA
Q8NAV1	158	PRPF38A	PRPF38A_C158	PR38A_HUMAN Pre-mRNA-splicing factor 38A OS=Homo sapiens OX=9606 GN=PRPF38A PE=1 SV=1	#CDIILPR	NA	1	NA	0.82	NA	0.82	NA	NA
Q14C86	1129	GAPVD1	GAPVD1_C1129	GAPD1_HUMAN GTPase-activating protein and VPS9 domain-containing protein 1 OS=Homo sapiens OX=9606 GN=GAPVD1 PE=1 SV=2	#CSADSVAFPVLTH	NA	1	NA	0.82	NA	0.82	NA	NA
Q9Y5J1	241	UTP18	UTP18_C241	UTP18_HUMAN U3 small nucleolar RNA-associated protein 18 homolog OS=Homo sapiens OX=9606 GN=UTP18 PE=1 SV=3	#CQHANAERPTVAR #CQHANAERPTVA	NA	4	NA	0.82	NA	0.82	NA	NA
Q9H6F5	116	CCDC86	CCDC86_C116	CCD86_HUMAN Coiled-coil domain-containing protein 86 OS=Homo sapiens OX=9606 GN=CCDC86 PE=1 SV=1	#CQPKPSEEAPK	NA	2	NA	0.82	NA	0.82	NA	NA
Q1KMD3	538	HNRNPUL2	HNRNPUL2_C538	HNRL2_HUMAN Heterogeneous nuclear ribonucleoprotein U-like protein 2 OS=Homo sapiens OX=9606 GN=HNRNPUL2 PE=1 SV=1	#CNVYNSGQR	#CNVYNSGQR	1	1	0.82	0.82	0.82	0	0
A0AVT1	17	UBA6	UBA6_C17	UBA6_HUMAN Ubiquitin-like modifier-activating enzyme 6 OS=Homo sapiens OX=9606 GN=UBA6 PE=1 SV=1	#CSSWGTGSTNK	#CSSWGTGSTNK	2	1	0.7	0.94	0.82	0.169706	20.6958
Q96JQ2	49	CLMN	CLMN_C49	CLMN_HUMAN Calmin OS=Homo sapiens OX=9606 GN=CLMN PE=1 SV=1	NA	#CNPPLEVK	NA	3	NA	0.82	0.82	NA	NA
Q9Y6N5	379	SQOR	SQOR_C379	SQOR_HUMAN Sulfide:quinone oxidoreductase, mitochondrial OS=Homo sapiens OX=9606 GN=SQOR PE=1 SV=1	NA	#CPLVTGYNR	NA	1	NA	0.82	0.82	NA	NA
O94916	108	NFAT5	NFAT5_C108	NFAT5_HUMAN Nuclear factor of activated T-cells 5 OS=Homo sapiens OX=9606 GN=NFAT5 PE=1 SV=1	#CSSAVGVSNR	#CSSAVGVSNR	2	2	0.83	0.8	0.815	0.0212132	2.60285
P62258	98	YWHAE	YWHAE_C98	1433E_HUMAN 14-3-3 protein epsilon OS=Homo sapiens OX=9606 GN=YWHAE PE=1 SV=1	#CDILDVLDK	#CDILDVLDK	3	2	0.81	0.82	0.815	0.00707107	0.867616
O43237	234	DYNC1LI2	DYNC1LI2_C234	DC1L2_HUMAN Cytoplasmic dynein 1 light intermediate chain 2 OS=Homo sapiens OX=9606 GN=DYNC1LI2 PE=1 SV=1	#CDAVSVLEK	#CDAVSVLEK	1	1	0.75	0.88	0.815	0.0919239	11.279
Q8TB52	707	FBXO30	FBXO30_C707	FBX30_HUMAN F-box only protein 30 OS=Homo sapiens OX=9606 GN=FBXO30 PE=1 SV=3	#CSYNVVEK	#CSYNVVEK	1	2	0.73	0.895	0.8125	0.116673	14.3597
P35270	10	SPR	SPR_C10	SPRE_HUMAN Sepiapterin reductase OS=Homo sapiens OX=9606 GN=SPR PE=1 SV=1	#CLLTGASR	#CLLTGASR	2	1	1.1	0.52	0.81	0.410122	50.6323
Q9Y490	1392	TLN1	TLN1_C1392	TLN1_HUMAN Talin-1 OS=Homo sapiens OX=9606 GN=TLN1 PE=1 SV=3	#CLDSVMENSK	#CLDSVMENSK	1	1	1.04	0.58	0.81	0.325269	40.1567
P78527	4106	PRKDC	PRKDC_C4106	PRKDC_HUMAN DNA-dependent protein kinase catalytic subunit OS=Homo sapiens OX=9606 GN=PRKDC PE=1 SV=3	#CLMDQATDPNILGR	#CLMDQATDPNILGR	3	6	0.85	0.77	0.81	0.0565685	6.98377
P35579	91	MYH9	MYH9_C91	MYH9_HUMAN Myosin-9 OS=Homo sapiens OX=9606 GN=MYH9 PE=1 SV=4	#CLNEASVLHNLK	#CLNEASVLHNLK #CLNEASVL	1	8	0.82	0.8	0.81	0.0141421	1.74594
Q92615	590	LARP4B	LARP4B_C590	LAR4B_HUMAN La-related protein 4B OS=Homo sapiens OX=9606 GN=LARP4B PE=1 SV=3	#CAVSATYER	NA	1	NA	0.81	NA	0.81	NA	NA
P00492	206	HPRT1	HPRT1_C206	HPRT_HUMAN Hypoxanthine-guanine phosphoribosyltransferase OS=Homo sapiens OX=9606 GN=HPRT1 PE=1 SV=2	#CVISETGK	NA	1	NA	0.81	NA	0.81	NA	NA
Q9H8H0	368	NOL11	NOL11_C368	NOL11_HUMAN Nucleolar protein 11 OS=Homo sapiens OX=9606 GN=NOL11 PE=1 SV=1	#CGLGFQNSEQSR	NA	1	NA	0.81	NA	0.81	NA	NA
Q12769	916	NUP160	NUP160_C916	NU160_HUMAN Nuclear pore complex protein Nup160 OS=Homo sapiens OX=9606 GN=NUP160 PE=1 SV=3	#CYLVTGEGQK	NA	1	NA	0.81	NA	0.81	NA	NA
P15880	229	RPS2	RPS2_C229	RS2_HUMAN 40S ribosomal protein S2 OS=Homo sapiens OX=9606 GN=RPS2 PE=1 SV=2	#CTATLGNFAK	#CTATLGNFAK	7	8	0.81	0.81	0.81	0	0
P39687	87	ANP32A	ANP32A_C87	AN32A_HUMAN Acidic leucine-rich nuclear phosphoprotein 32 family member A OS=Homo sapiens OX=9606 GN=ANP32A PE=1 SV=1	#CPNLTHL	NA	1	NA	0.81	NA	0.81	NA	NA
Q14204	1956	DYNC1H1	DYNC1H1_C1956	DYHC1_HUMAN Cytoplasmic dynein 1 heavy chain 1 OS=Homo sapiens OX=9606 GN=DYNC1H1 PE=1 SV=5	#CFDEFNR	NA	1	NA	0.81	NA	0.81	NA	NA
Q9Y490	1087	TLN1	TLN1_C1087	TLN1_HUMAN Talin-1 OS=Homo sapiens OX=9606 GN=TLN1 PE=1 SV=3	#CTQDLGNSTK	#CTQDLGNSTK	1	1	0.69	0.93	0.81	0.169706	20.9513
O60701	241	UGDH	UGDH_C241	UGDH_HUMAN UDP-glucose 6-dehydrogenase OS=Homo sapiens OX=9606 GN=UGDH PE=1 SV=1	NA	#CEATGADVEE #CEATGADVEEVATAIGMDQR	NA	6	NA	0.81	0.81	NA	NA
Q8TEQ6	793	GEMIN5	GEMIN5_C793	GEMI5_HUMAN Gem-associated protein 5 OS=Homo sapiens OX=9606 GN=GEMIN5 PE=1 SV=3	NA	#CGLAPAVSR	NA	1	NA	0.81	0.81	NA	NA
P35579	740	MYH9	MYH9_C740	MYH9_HUMAN Myosin-9 OS=Homo sapiens OX=9606 GN=MYH9 PE=1 SV=4	NA	#CVLMIK	NA	1	NA	0.81	0.81	NA	NA
P08195	431	SLC3A2	SLC3A2_C431	4F2_HUMAN 4F2 cell-surface antigen heavy chain OS=Homo sapiens OX=9606 GN=SLC3A2 PE=1 SV=3	NA	#CSWSLSQAR	NA	1	NA	0.81	0.81	NA	NA
Q14204	1932	DYNC1H1	DYNC1H1_C1932	DYHC1_HUMAN Cytoplasmic dynein 1 heavy chain 1 OS=Homo sapiens OX=9606 GN=DYNC1H1 PE=1 SV=5	NA	#CDETFDFQAMGR	NA	1	NA	0.81	0.81	NA	NA
O43567	266	RNF13	RNF13_C266	RNF13_HUMAN E3 ubiquitin-protein ligase RNF13 OS=Homo sapiens OX=9606 GN=RNF13 PE=1 SV=1	NA	#CVDPWLTK	NA	2	NA	0.81	0.81	NA	NA
Q9NVE7	451	PANK4	PANK4_C451	PANK4_HUMAN Pantothenate kinase 4 OS=Homo sapiens OX=9606 GN=PANK4 PE=1 SV=1	NA	#CFEEALDGVVK	NA	2	NA	0.81	0.81	NA	NA
P48426	343	PIP4K2A	PIP4K2A_C343	PI42A_HUMAN Phosphatidylinositol 5-phosphate 4-kinase type-2 alpha OS=Homo sapiens OX=9606 GN=PIP4K2A PE=1 SV=2	NA	#CHENSPR	NA	3	NA	0.81	0.81	NA	NA
Q08J23	184	NSUN2	NSUN2_C184	NSUN2_HUMAN tRNA (cytosine(34)-C(5))-methyltransferase OS=Homo sapiens OX=9606 GN=NSUN2 PE=1 SV=2	NA	#CAAPGSK	NA	2	NA	0.81	0.81	NA	NA
Q9H6S0	1265	YTHDC2	YTHDC2_C1265	YTDC2_HUMAN 3'-5' RNA helicase YTHDC2 OS=Homo sapiens OX=9606 GN=YTHDC2 PE=1 SV=2	NA	#CASPSPPSSGK	NA	1	NA	0.81	0.81	NA	NA
P78371	412	CCT2	CCT2_C412	TCPB_HUMAN T-complex protein 1 subunit beta OS=Homo sapiens OX=9606 GN=CCT2 PE=1 SV=4	NA	#CSEMLMAH	NA	1	NA	0.81	0.81	NA	NA
P49189	220	ALDH9A1	ALDH9A1_C220	AL9A1_HUMAN 4-trimethylaminobutyraldehyde dehydrogenase OS=Homo sapiens OX=9606 GN=ALDH9A1 PE=1 SV=3	#CQHPDVAK	#CQHPDVAK	2	3	1.05	0.56	0.805	0.346482	43.0413
Q3LXA3	404	TKFC	TKFC_C404	TKFC_HUMAN Triokinase/FMN cyclase OS=Homo sapiens OX=9606 GN=TKFC PE=1 SV=2	NA	#CGTTHSR	NA	2	NA	0.805	0.805	NA	NA
Q16204	27	CCDC6	CCDC6_C27	CCDC6_HUMAN Coiled-coil domain-containing protein 6 OS=Homo sapiens OX=9606 GN=CCDC6 PE=1 SV=2	NA	#CSSTSGGGGGGGGGGGGGK	NA	2	NA	0.805	0.805	NA	NA
O75608	211	LYPLA1	LYPLA1_C211	LYPA1_HUMAN Acyl-protein thioesterase 1 OS=Homo sapiens OX=9606 GN=LYPLA1 PE=1 SV=1	#CQQEMMDVK	#CQQEMMDVK	5	5	0.9	0.71	0.805	0.13435	16.6895
Q6PUV4	90	CPLX2	CPLX2_C90	CPLX2_HUMAN Complexin-2 OS=Homo sapiens OX=9606 GN=CPLX2 PE=2 SV=2	#CEGSLTRPK	#CEGSLTRPK	4	2	0.84	0.77	0.805	0.0494975	6.14875
Q9NVM4	595	PRMT7	PRMT7_C595	ANM7_HUMAN Protein arginine N-methyltransferase 7 OS=Homo sapiens OX=9606 GN=PRMT7 PE=1 SV=1	#CAEGTVELR	#CAEGTVELR	1	1	0.82	0.79	0.805	0.0212132	2.63518
Q8NI27	931	THOC2	THOC2_C931	THOC2_HUMAN THO complex subunit 2 OS=Homo sapiens OX=9606 GN=THOC2 PE=1 SV=2	#CTALQDK	#CTALQDK	2	2	0.885	0.72	0.8025	0.116673	14.5386
P68104	363	EEF1A1	EEF1A1_C363	EF1A1_HUMAN Elongation factor 1-alpha 1 OS=Homo sapiens OX=9606 GN=EEF1A1 PE=1 SV=1	#CHTAHIACK #CHTAHIA	#CHTAHIA	4	2	0.865	0.74	0.8025	0.0883883	11.0141
Q92769	274	HDAC2	HDAC2_C274	HDAC2_HUMAN Histone deacetylase 2 OS=Homo sapiens OX=9606 GN=HDAC2 PE=1 SV=2	#CFNLTVK	#CFNLTVK	1	1	0.9	0.7	0.8	0.141421	17.6777
P51784	526	USP11	USP11_C526	UBP11_HUMAN Ubiquitin carboxyl-terminal hydrolase 11 OS=Homo sapiens OX=9606 GN=USP11 PE=1 SV=3	#CVAISK	NA	1	NA	0.8	NA	0.8	NA	NA
Q86T03	104	PIP4P1	PIP4P1_C104	PP4P1_HUMAN Type 1 phosphatidylinositol 4,5-bisphosphate 4-phosphatase OS=Homo sapiens OX=9606 GN=PIP4P1 PE=1 SV=1	#CGVCNEATPIK	NA	1	NA	0.8	NA	0.8	NA	NA
P62191	148	PSMC1	PSMC1_C148	PRS4_HUMAN 26S proteasome regulatory subunit 4 OS=Homo sapiens OX=9606 GN=PSMC1 PE=1 SV=1	#CSVLLNHK	NA	2	NA	0.8	NA	0.8	NA	NA
O75122	696	CLASP2	CLASP2_C696	CLAP2_HUMAN CLIP-associating protein 2 OS=Homo sapiens OX=9606 GN=CLASP2 PE=1 SV=3	#CEIFTR	NA	1	NA	0.8	NA	0.8	NA	NA
Q00839	408	HNRNPU	HNRNPU_C408	HNRPU_HUMAN Heterogeneous nuclear ribonucleoprotein U OS=Homo sapiens OX=9606 GN=HNRNPU PE=1 SV=6	#CFANFESDEVELSYAK	NA	2	NA	0.8	NA	0.8	NA	NA
P62917	115	RPL8	RPL8_C115	RL8_HUMAN 60S ribosomal protein L8 OS=Homo sapiens OX=9606 GN=RPL8 PE=1 SV=2	#CLEEKPGDR	NA	4	NA	0.8	NA	0.8	NA	NA
P48643	429	CCT5	CCT5_C429	TCPE_HUMAN T-complex protein 1 subunit epsilon OS=Homo sapiens OX=9606 GN=CCT5 PE=1 SV=1	#CALAVSQEADK	#CALAVSQEADK	1	2	0.77	0.83	0.8	0.0424264	5.3033
Q15149	3493	PLEC	PLEC_C3493	PLEC_HUMAN Plectin OS=Homo sapiens OX=9606 GN=PLEC PE=1 SV=3	NA	#CLAGIYLEDTK	NA	2	NA	0.8	0.8	NA	NA
Q01433	230	AMPD2	AMPD2_C230	AMPD2_HUMAN AMP deaminase 2 OS=Homo sapiens OX=9606 GN=AMPD2 PE=1 SV=2	NA	#CGVPFTDLLDAAK	NA	1	NA	0.8	0.8	NA	NA
Q9NVR5	673	DNAAF2	DNAAF2_C673	KTU_HUMAN Protein kintoun OS=Homo sapiens OX=9606 GN=DNAAF2 PE=1 SV=2	NA	#CSNSDQLQGK	NA	1	NA	0.8	0.8	NA	NA
Q92576	1709	PHF3	PHF3_C1709	PHF3_HUMAN PHD finger protein 3 OS=Homo sapiens OX=9606 GN=PHF3 PE=1 SV=3	NA	#CVQQSDNLK	NA	1	NA	0.8	0.8	NA	NA
O95573	450	ACSL3	ACSL3_C450	ACSL3_HUMAN Long-chain-fatty-acid--CoA ligase 3 OS=Homo sapiens OX=9606 GN=ACSL3 PE=1 SV=3	#CGGAPLSATTQR	#CGGAPLSATTQR	1	2	0.85	0.745	0.7975	0.0742462	9.30987
Q8N684	399	CPSF7	CPSF7_C399	CPSF7_HUMAN Cleavage and polyadenylation specificity factor subunit 7 OS=Homo sapiens OX=9606 GN=CPSF7 PE=1 SV=1	#CLHGIEAK	#CLHGIEAK	2	2	1.06	0.53	0.795	0.374767	47.1405
P21333	1260	FLNA	FLNA_C1260	FLNA_HUMAN Filamin-A OS=Homo sapiens OX=9606 GN=FLNA PE=1 SV=4	#CYGPGIEGQGVFR	#CYGPGIEGQGVFR	2	4	0.8	0.79	0.795	0.00707107	0.889442
P26640	381	VARS	VARS_C381	SYVC_HUMAN Valine--tRNA ligase OS=Homo sapiens OX=9606 GN=VARS PE=1 SV=4	#CDHAGIATQVVVEK #CDHAGIATQ	NA	4	NA	0.795	NA	0.795	NA	NA
Q14671	1085	PUM1	PUM1_C1085	PUM1_HUMAN Pumilio homolog 1 OS=Homo sapiens OX=9606 GN=PUM1 PE=1 SV=3	NA	#CVTHASR	NA	2	NA	0.795	0.795	NA	NA
A3KMH1	724	VWA8	VWA8_C724	VWA8_HUMAN von Willebrand factor A domain-containing protein 8 OS=Homo sapiens OX=9606 GN=VWA8 PE=1 SV=2	#CEVTSGTLR	#CEVTSGTLR	2	1	0.95	0.64	0.795	0.219203	27.5727
Q8IY17	991	PNPLA6	PNPLA6_C991	PLPL6_HUMAN Neuropathy target esterase OS=Homo sapiens OX=9606 GN=PNPLA6 PE=1 SV=3	#CSHIGVLK	#CSHIGVLK	4	5	0.87	0.72	0.795	0.106066	13.3416
Q13501	128	SQSTM1	SQSTM1_C128	SQSTM_HUMAN Sequestosome-1 OS=Homo sapiens OX=9606 GN=SQSTM1 PE=1 SV=1	#CDGCNGPVVGTR	#CDGCNGPVVGTR	2	1	0.77	0.82	0.795	0.0353553	4.44721
O15355	13	PPM1G	PPM1G_C13	PPM1G_HUMAN Protein phosphatase 1G OS=Homo sapiens OX=9606 GN=PPM1G PE=1 SV=1	#CSGDGVGAPR	#CSGDGVGAPR	5	2	0.77	0.82	0.795	0.0353553	4.44721
Q04828	87	AKR1C1	AKR1C1_C87	AK1C1_HUMAN Aldo-keto reductase family 1 member C1 OS=Homo sapiens OX=9606 GN=AKR1C1 PE=1 SV=1	#CNSHRPELVR #CNSHRPELVRPA	#CNSHRPE #CNSHRPELVRPA	8	3	0.69	0.9	0.795	0.148492	18.6783
O95757	290	HSPA4L	HSPA4L_C290	HS74L_HUMAN Heat shock 70 kDa protein 4L OS=Homo sapiens OX=9606 GN=HSPA4L PE=1 SV=3	#CFMNDLDVSSK	#CFMNDLDVSSK	2	4	0.81	0.77	0.79	0.0282843	3.58029
Q08AF3	14	SLFN5	SLFN5_C14	SLFN5_HUMAN Schlafen family member 5 OS=Homo sapiens OX=9606 GN=SLFN5 PE=1 SV=1	#CVVDAGK	NA	1	NA	0.79	NA	0.79	NA	NA
Q86UW9	537	DTX2	DTX2_C537	DTX2_HUMAN Probable E3 ubiquitin-protein ligase DTX2 OS=Homo sapiens OX=9606 GN=DTX2 PE=1 SV=3	#CYLPDNAQGR	NA	1	NA	0.79	NA	0.79	NA	NA
P78527	4061	PRKDC	PRKDC_C4061	PRKDC_HUMAN DNA-dependent protein kinase catalytic subunit OS=Homo sapiens OX=9606 GN=PRKDC PE=1 SV=3	#CDELLLGHEK	NA	2	NA	0.79	NA	0.79	NA	NA
O00567	112	NOP56	NOP56_C112	NOP56_HUMAN Nucleolar protein 56 OS=Homo sapiens OX=9606 GN=NOP56 PE=1 SV=4	#CQTGGVIAEILR	NA	1	NA	0.79	NA	0.79	NA	NA
P21796	127	VDAC1	VDAC1_C127	VDAC1_HUMAN Voltage-dependent anion-selective channel protein 1 OS=Homo sapiens OX=9606 GN=VDAC1 PE=1 SV=2	#CDMDFDIAGPSIR	#CDMDFDIAGPSIR	1	4	0.7	0.88	0.79	0.127279	16.1113
P63104	94	YWHAZ	YWHAZ_C94	1433Z_HUMAN 14-3-3 protein zeta/delta OS=Homo sapiens OX=9606 GN=YWHAZ PE=1 SV=1	#CNDVLSLLEK	#CNDVLSLLEK	1	1	0.68	0.9	0.79	0.155563	19.6916
Q8IWE2	494	FAM114A1	FAM114A1_C494	NXP20_HUMAN Protein NOXP20 OS=Homo sapiens OX=9606 GN=FAM114A1 PE=1 SV=2	NA	#CNEVASLSK	NA	2	NA	0.79	0.79	NA	NA
Q86YV5	390	PRAG1	PRAG1_C390	PRAG1_HUMAN Inactive tyrosine-protein kinase PRAG1 OS=Homo sapiens OX=9606 GN=PRAG1 PE=1 SV=4	NA	#CLGLTGEPQPPAHPR	NA	1	NA	0.79	0.79	NA	NA
P46777	100	RPL5	RPL5_C100	RL5_HUMAN 60S ribosomal protein L5 OS=Homo sapiens OX=9606 GN=RPL5 PE=1 SV=3	NA	#CTGLLLAR	NA	2	NA	0.79	0.79	NA	NA
Q9NYV4	1009	CDK12	CDK12_C1009	CDK12_HUMAN Cyclin-dependent kinase 12 OS=Homo sapiens OX=9606 GN=CDK12 PE=1 SV=2	NA	#CTAEQTLQSDFLK	NA	2	NA	0.79	0.79	NA	NA
Q8N5I2	49	ARRDC1	ARRDC1_C49	ARRD1_HUMAN Arrestin domain-containing protein 1 OS=Homo sapiens OX=9606 GN=ARRDC1 PE=1 SV=1	NA	#CGVSNK	NA	1	NA	0.79	0.79	NA	NA
P23396	134	RPS3	RPS3_C134	RS3_HUMAN 40S ribosomal protein S3 OS=Homo sapiens OX=9606 GN=RPS3 PE=1 SV=2	#CEVVVSGK	#CEVVVSGK	4	6	0.84	0.735	0.7875	0.0742462	9.42809
Q12913	1141	PTPRJ	PTPRJ_C1141	PTPRJ_HUMAN Receptor-type tyrosine-protein phosphatase eta OS=Homo sapiens OX=9606 GN=PTPRJ PE=1 SV=3	#CVEQGR	#CVEQGR	1	1	0.81	0.76	0.785	0.0353553	4.50386
P49327	779	FASN	FASN_C779	FAS_HUMAN Fatty acid synthase OS=Homo sapiens OX=9606 GN=FASN PE=1 SV=3	NA	#CTIIPLMK	NA	2	NA	0.785	0.785	NA	NA
Q92598	290	HSPH1	HSPH1_C290	HS105_HUMAN Heat shock protein 105 kDa OS=Homo sapiens OX=9606 GN=HSPH1 PE=1 SV=1	#CFMNDK	#CFMNDK #CFMNDKDVSGK	4	4	0.82	0.75	0.785	0.0494975	6.30541
P14678	19	SNRPB	SNRPB_C19	RSMB_HUMAN Small nuclear ribonucleoprotein-associated proteins B and B' OS=Homo sapiens OX=9606 GN=SNRPB PE=1 SV=2	#CILQDGR	#CILQDGR	2	2	0.7	0.87	0.785	0.120208	15.3131
Q9Y6Y8	343	SEC23IP	SEC23IP_C343	S23IP_HUMAN SEC23-interacting protein OS=Homo sapiens OX=9606 GN=SEC23IP PE=1 SV=1	#CTWFYK	#CTWFYK	1	2	0.83	0.73	0.78	0.0707107	9.06547
P41440	246	SLC19A1	SLC19A1_C246	S19A1_HUMAN Reduced folate transporter OS=Homo sapiens OX=9606 GN=SLC19A1 PE=1 SV=3	#CGDSVLAR	NA	2	NA	0.78	NA	0.78	NA	NA
Q5SRE5	1433	NUP188	NUP188_C1433	NU188_HUMAN Nucleoporin NUP188 homolog OS=Homo sapiens OX=9606 GN=NUP188 PE=1 SV=1	#CLNAVR	NA	1	NA	0.78	NA	0.78	NA	NA
P47756	206	CAPZB	CAPZB_C206	CAPZB_HUMAN F-actin-capping protein subunit beta OS=Homo sapiens OX=9606 GN=CAPZB PE=1 SV=4	#CSPHIANIGR	NA	1	NA	0.78	NA	0.78	NA	NA
Q15942	504	ZYX	ZYX_C504	ZYX_HUMAN Zyxin OS=Homo sapiens OX=9606 GN=ZYX PE=1 SV=1	#CSVCSEPIMPEPGRDETVR	NA	1	NA	0.78	NA	0.78	NA	NA
Q9NZM1	1143	MYOF	MYOF_C1143	MYOF_HUMAN Myoferlin OS=Homo sapiens OX=9606 GN=MYOF PE=1 SV=1	#CYVYQAR	NA	2	NA	0.78	NA	0.78	NA	NA
Q9H583	1237	HEATR1	HEATR1_C1237	HEAT1_HUMAN HEAT repeat-containing protein 1 OS=Homo sapiens OX=9606 GN=HEATR1 PE=1 SV=3	#CLEPLPQEQGNMEYTK	NA	1	NA	0.78	NA	0.78	NA	NA
Q8WUM4	691	PDCD6IP	PDCD6IP_C691	PDC6I_HUMAN Programmed cell death 6-interacting protein OS=Homo sapiens OX=9606 GN=PDCD6IP PE=1 SV=1	#CSDIVFAR	NA	1	NA	0.78	NA	0.78	NA	NA
P52209	170	PGD	PGD_C170	6PGD_HUMAN 6-phosphogluconate dehydrogenase, decarboxylating OS=Homo sapiens OX=9606 GN=PGD PE=1 SV=3	#CCDWVGDEGAGHFVK	NA	1	NA	0.78	NA	0.78	NA	NA
O95478	154	NSA2	NSA2_C154	NSA2_HUMAN Ribosome biogenesis protein NSA2 homolog OS=Homo sapiens OX=9606 GN=NSA2 PE=1 SV=1	#CFVGDGFTR	NA	2	NA	0.78	NA	0.78	NA	NA
P49736	340	MCM2	MCM2_C340	MCM2_HUMAN DNA replication licensing factor MCM2 OS=Homo sapiens OX=9606 GN=MCM2 PE=1 SV=4	#CQSQNQEVKPG	NA	2	NA	0.78	NA	0.78	NA	NA
Q9NRL3	562	STRN4	STRN4_C562	STRN4_HUMAN Striatin-4 OS=Homo sapiens OX=9606 GN=STRN4 PE=1 SV=2	#CSADGTVR	NA	1	NA	0.78	NA	0.78	NA	NA
Q15056	85	EIF4H	EIF4H_C85	IF4H_HUMAN Eukaryotic translation initiation factor 4H OS=Homo sapiens OX=9606 GN=EIF4H PE=1 SV=5	#CYVEFDEVDSLK	#CYVEFDEVDSLK	1	1	0.56	1	0.78	0.311127	39.8881
P48200	137	IREB2	IREB2_C137	IREB2_HUMAN Iron-responsive element-binding protein 2 OS=Homo sapiens OX=9606 GN=IREB2 PE=1 SV=4	NA	#CAIQNAPNPGGGDLQK	NA	5	NA	0.78	0.78	NA	NA
P49069	123	CAMLG	CAMLG_C123	CAMLG_HUMAN Calcium signal-modulating cyclophilin ligand OS=Homo sapiens OX=9606 GN=CAMLG PE=1 SV=1	NA	#CSSDVNLELR	NA	1	NA	0.78	0.78	NA	NA
P11216	496	PYGB	PYGB_C496	PYGB_HUMAN Glycogen phosphorylase, brain form OS=Homo sapiens OX=9606 GN=PYGB PE=1 SV=5	NA	#CNPGLADTIVEK	NA	3	NA	0.78	0.78	NA	NA
Q6PCB6	251	ABHD17C	ABHD17C_C251	AB17C_HUMAN Alpha/beta hydrolase domain-containing protein 17C OS=Homo sapiens OX=9606 GN=ABHD17C PE=1 SV=2	NA	#CFDAFPSIDK	NA	1	NA	0.78	0.78	NA	NA
P46459	21	NSF	NSF_C21	NSF_HUMAN Vesicle-fusing ATPase OS=Homo sapiens OX=9606 GN=NSF PE=1 SV=3	NA	#CAVVNEK	NA	2	NA	0.78	0.78	NA	NA
Q14690	694	PDCD11	PDCD11_C694	RRP5_HUMAN Protein RRP5 homolog OS=Homo sapiens OX=9606 GN=PDCD11 PE=1 SV=3	NA	#CLSQSEGR	NA	1	NA	0.78	0.78	NA	NA
P17987	76	TCP1	TCP1_C76	TCPA_HUMAN T-complex protein 1 subunit alpha OS=Homo sapiens OX=9606 GN=TCP1 PE=1 SV=1	#CELADLQDK	#CELADLQDK	1	1	0.89	0.66	0.775	0.162635	20.9851
P49023	546	PXN	PXN_C546	PAXI_HUMAN Paxillin OS=Homo sapiens OX=9606 GN=PXN PE=1 SV=3	#CITAMAK	#CITAMAK	2	2	0.87	0.68	0.775	0.13435	17.3355
Q96GX9	147	APIP	APIP_C147	MTNB_HUMAN Methylthioribulose-1-phosphate dehydratase OS=Homo sapiens OX=9606 GN=APIP PE=1 SV=1	#CTSGGYYR	#CTSGGYYR	2	1	0.87	0.68	0.775	0.13435	17.3355
Q00610	870	CLTC	CLTC_C870	CLH1_HUMAN Clathrin heavy chain 1 OS=Homo sapiens OX=9606 GN=CLTC PE=1 SV=5	#CEEPATHNAL #CEEPATHNALAK	#CEEPATHNAL #CEEPATHNALAK	6	5	0.79	0.76	0.775	0.0212132	2.73719
Q9H9E3	25	COG4	COG4_C25	COG4_HUMAN Conserved oligomeric Golgi complex subunit 4 OS=Homo sapiens OX=9606 GN=COG4 PE=1 SV=3	#CSEISAELIR	#CSEISAELIR	3	2	0.75	0.8	0.775	0.0353553	4.56198
Q13155	168	AIMP2	AIMP2_C168	AIMP2_HUMAN Aminoacyl tRNA synthase complex-interacting multifunctional protein 2 OS=Homo sapiens OX=9606 GN=AIMP2 PE=1 SV=2	#CFGEQNK #CFGEQNKK	#CFGEQNK	4	2	0.68	0.87	0.775	0.13435	17.3355
P38606	394	ATP6V1A	ATP6V1A_C394	VATA_HUMAN V-type proton ATPase catalytic subunit A OS=Homo sapiens OX=9606 GN=ATP6V1A PE=1 SV=2	#CLGNPER	#CLGNPER	1	1	0.83	0.72	0.775	0.0777817	10.0364
P63010	225	AP2B1	AP2B1_C225	AP2B1_HUMAN AP-2 complex subunit beta OS=Homo sapiens OX=9606 GN=AP2B1 PE=1 SV=1	#CLSNYNPK	#CLSNYNPK	1	1	0.59	0.96	0.775	0.26163	33.7586
P47756	8	CAPZB	CAPZB_C8	CAPZB_HUMAN F-actin-capping protein subunit beta OS=Homo sapiens OX=9606 GN=CAPZB PE=1 SV=4	#CALDLMR	#CALDLMR	2	1	1.035	0.51	0.7725	0.371231	48.0558
Q9UHI6	181	DDX20	DDX20_C181	DDX20_HUMAN Probable ATP-dependent RNA helicase DDX20 OS=Homo sapiens OX=9606 GN=DDX20 PE=1 SV=2	#CHIAVGSPGR	#CHIAVGSPGR	2	1	0.885	0.66	0.7725	0.159099	20.5953
Q8WZ82	41	OVCA2	OVCA2_C41	OVCA2_HUMAN Esterase OVCA2 OS=Homo sapiens OX=9606 GN=OVCA2 PE=1 SV=1	#CLSGPHPVPDPPGPEGAR	NA	2	NA	0.77	NA	0.77	NA	NA
P40939	713	HADHA	HADHA_C713	ECHA_HUMAN Trifunctional enzyme subunit alpha, mitochondrial OS=Homo sapiens OX=9606 GN=HADHA PE=1 SV=2	#CLGGPFR	NA	1	NA	0.77	NA	0.77	NA	NA
Q6ZMZ0	290	RNF19B	RNF19B_C290	RN19B_HUMAN E3 ubiquitin-protein ligase RNF19B OS=Homo sapiens OX=9606 GN=RNF19B PE=1 SV=2	#CSAYIIK	NA	1	NA	0.77	NA	0.77	NA	NA
P42226	272	STAT6	STAT6_C272	STAT6_HUMAN Signal transducer and activator of transcription 6 OS=Homo sapiens OX=9606 GN=STAT6 PE=1 SV=1	#CFLVEK	NA	1	NA	0.77	NA	0.77	NA	NA
P52732	819	KIF11	KIF11_C819	KIF11_HUMAN Kinesin-like protein KIF11 OS=Homo sapiens OX=9606 GN=KIF11 PE=1 SV=2	#CESLNTR	NA	1	NA	0.77	NA	0.77	NA	NA
Q5T4S7	2489	UBR4	UBR4_C2489	UBR4_HUMAN E3 ubiquitin-protein ligase UBR4 OS=Homo sapiens OX=9606 GN=UBR4 PE=1 SV=1	#CFAVGPIIEK	#CFAVGPIIEK	2	1	0.7	0.84	0.77	0.0989949	12.8565
Q9UQ35	872	SRRM2	SRRM2_C872	SRRM2_HUMAN Serine/arginine repetitive matrix protein 2 OS=Homo sapiens OX=9606 GN=SRRM2 PE=1 SV=2	#CFESSPDPELK	#CFESSPDPELK	2	1	0.58	0.96	0.77	0.268701	34.8962
P50395	317	GDI2	GDI2_C317	GDIB_HUMAN Rab GDP dissociation inhibitor beta OS=Homo sapiens OX=9606 GN=GDI2 PE=1 SV=2	NA	#CQIIIPQNQVNR	NA	1	NA	0.77	0.77	NA	NA
P04920	1215	SLC4A2	SLC4A2_C1215	B3A2_HUMAN Anion exchange protein 2 OS=Homo sapiens OX=9606 GN=SLC4A2 PE=1 SV=4	NA	#CLDANEAEPVFDER	NA	1	NA	0.77	0.77	NA	NA
Q14139	490	UBE4A	UBE4A_C490	UBE4A_HUMAN Ubiquitin conjugation factor E4 A OS=Homo sapiens OX=9606 GN=UBE4A PE=1 SV=2	NA	#CLIPAVQEPK	NA	1	NA	0.77	0.77	NA	NA
P00352	370	ALDH1A1	ALDH1A1_C370	AL1A1_HUMAN Retinal dehydrogenase 1 OS=Homo sapiens OX=9606 GN=ALDH1A1 PE=1 SV=2	#CGGGPWGNK	#CGGGPWGNK	6	9	0.765	0.77	0.7675	0.00353553	0.460656
Q96I24	366	FUBP3	FUBP3_C366	FUBP3_HUMAN Far upstream element-binding protein 3 OS=Homo sapiens OX=9606 GN=FUBP3 PE=1 SV=2	#CGLVIGK	#CGLVIGK	2	1	0.98	0.55	0.765	0.304056	39.7459
P22102	237	GART	GART_C237	PUR2_HUMAN Trifunctional purine biosynthetic protein adenosine-3 OS=Homo sapiens OX=9606 GN=GART PE=1 SV=1	#CPAPQVSNDLLLK	#CPAPQVSNDLLLK	2	2	0.76	0.77	0.765	0.00707107	0.924323
P47712	726	PLA2G4A	PLA2G4A_C726	PA24A_HUMAN Cytosolic phospholipase A2 OS=Homo sapiens OX=9606 GN=PLA2G4A PE=1 SV=2	NA	#CSVSLSNVEAR	NA	4	NA	0.765	0.765	NA	NA
P52594	29	AGFG1	AGFG1_C29	AGFG1_HUMAN Arf-GAP domain and FG repeat-containing protein 1 OS=Homo sapiens OX=9606 GN=AGFG1 PE=1 SV=2	#CFDCDQR	NA	1	NA	0.76	NA	0.76	NA	NA
P60903	83	S100A10	S100A10_C83	S10AA_HUMAN Protein S100-A10 OS=Homo sapiens OX=9606 GN=S100A10 PE=1 SV=2	#CNDYFVVHM	NA	1	NA	0.76	NA	0.76	NA	NA
Q5JPI3	30	C3orf38	C3orf38_C30	CC038_HUMAN Uncharacterized protein C3orf38 OS=Homo sapiens OX=9606 GN=C3orf38 PE=1 SV=1	#CDTVTNR	NA	1	NA	0.76	NA	0.76	NA	NA
Q92667	376	AKAP1	AKAP1_C376	AKAP1_HUMAN A-kinase anchor protein 1, mitochondrial OS=Homo sapiens OX=9606 GN=AKAP1 PE=1 SV=1	#CQASQLQGQK	NA	2	NA	0.76	NA	0.76	NA	NA
O43896	711	KIF1C	KIF1C_C711	KIF1C_HUMAN Kinesin-like protein KIF1C OS=Homo sapiens OX=9606 GN=KIF1C PE=1 SV=3	#CGLPSSGK	NA	1	NA	0.76	NA	0.76	NA	NA
Q9NRZ9	205	HELLS	HELLS_C205	HELLS_HUMAN Lymphoid-specific helicase OS=Homo sapiens OX=9606 GN=HELLS PE=1 SV=1	#CNGQPVPFQQPK	#CNGQPVPFQQPK	1	3	0.71	0.81	0.76	0.0707107	9.30404
Q92945	436	KHSRP	KHSRP_C436	FUBP2_HUMAN Far upstream element-binding protein 2 OS=Homo sapiens OX=9606 GN=KHSRP PE=1 SV=4	#CGLVIGR	#CGLVIGR	1	2	0.7	0.82	0.76	0.0848528	11.1648
P34932	310	HSPA4	HSPA4_C310	HSP74_HUMAN Heat shock 70 kDa protein 4 OS=Homo sapiens OX=9606 GN=HSPA4 PE=1 SV=4	#CNDLLAR	#CNDLLAR	1	2	0.65	0.87	0.76	0.155563	20.4689
Q00610	151	CLTC	CLTC_C151	CLH1_HUMAN Clathrin heavy chain 1 OS=Homo sapiens OX=9606 GN=CLTC PE=1 SV=5	NA	#CQIINYR	NA	1	NA	0.76	0.76	NA	NA
Q9BV68	16	RNF126	RNF126_C16	RN126_HUMAN E3 ubiquitin-protein ligase RNF126 OS=Homo sapiens OX=9606 GN=RNF126 PE=1 SV=2	NA	#CSVEIVPR	NA	1	NA	0.76	0.76	NA	NA
Q96RU3	248	FNBP1	FNBP1_C248	FNBP1_HUMAN Formin-binding protein 1 OS=Homo sapiens OX=9606 GN=FNBP1 PE=1 SV=2	NA	#CLDGIVK	NA	1	NA	0.76	0.76	NA	NA
P49736	624	MCM2	MCM2_C624	MCM2_HUMAN DNA replication licensing factor MCM2 OS=Homo sapiens OX=9606 GN=MCM2 PE=1 SV=4	NA	#CTVIAAANPIGGR	NA	3	NA	0.76	0.76	NA	NA
Q13616	752	CUL1	CUL1_C752	CUL1_HUMAN Cullin-1 OS=Homo sapiens OX=9606 GN=CUL1 PE=1 SV=2	NA	#CIDILIEK	NA	1	NA	0.76	0.76	NA	NA
P49368	455	CCT3	CCT3_C455	TCPG_HUMAN T-complex protein 1 subunit gamma OS=Homo sapiens OX=9606 GN=CCT3 PE=1 SV=4	#CGASTIR	#CGASTIR	2	1	0.785	0.73	0.7575	0.0388909	5.13411
P09936	90	UCHL1	UCHL1_C90	UCHL1_HUMAN Ubiquitin carboxyl-terminal hydrolase isozyme L1 OS=Homo sapiens OX=9606 GN=UCHL1 PE=1 SV=2	#CGTIGLIH #CGTIGLIHAVANNQDK #CGTIGLIHAV	#CGTIGLIHAVANNQDK #CGTIGLIH #CGTIGLIHAV	9	10	0.89	0.62	0.755	0.190919	25.2873
Q8NFW8	148	CMAS	CMAS_C148	NEUA_HUMAN N-acylneuraminate cytidylyltransferase OS=Homo sapiens OX=9606 GN=CMAS PE=1 SV=2	#CLHPTDLQK	NA	1	NA	0.75	NA	0.75	NA	NA
P53602	12	MVD	MVD_C12	MVD1_HUMAN Diphosphomevalonate decarboxylase OS=Homo sapiens OX=9606 GN=MVD PE=1 SV=1	#CTAPVNIAVIK	NA	1	NA	0.75	NA	0.75	NA	NA
Q7L2H7	134	EIF3M	EIF3M_C134	EIF3M_HUMAN Eukaryotic translation initiation factor 3 subunit M OS=Homo sapiens OX=9606 GN=EIF3M PE=1 SV=1	#CGAIQYIPTELDQVR	NA	2	NA	0.75	NA	0.75	NA	NA
P28370	1016	SMARCA1	SMARCA1_C1016	SMCA1_HUMAN Probable global transcription activator SNF2L1 OS=Homo sapiens OX=9606 GN=SMARCA1 PE=1 SV=2	#CNTLISLIEK	NA	1	NA	0.75	NA	0.75	NA	NA
Q8NBS9	121	TXNDC5	TXNDC5_C121	TXND5_HUMAN Thioredoxin domain-containing protein 5 OS=Homo sapiens OX=9606 GN=TXNDC5 PE=1 SV=2	#CTAHSDVCSAQGVR	NA	1	NA	0.75	NA	0.75	NA	NA
O75691	1794	UTP20	UTP20_C1794	UTP20_HUMAN Small subunit processome component 20 homolog OS=Homo sapiens OX=9606 GN=UTP20 PE=1 SV=3	#CLASTTK	NA	2	NA	0.75	NA	0.75	NA	NA
P49748	215	ACADVL	ACADVL_C215	ACADV_HUMAN Very long-chain specific acyl-CoA dehydrogenase, mitochondrial OS=Homo sapiens OX=9606 GN=ACADVL PE=1 SV=1	#CLTEPSSGSDAASIR	#CLTEPSSGSDAASIR	3	2	0.7	0.8	0.75	0.0707107	9.42809
P27824	366	CANX	CANX_C366	CALX_HUMAN Calnexin OS=Homo sapiens OX=9606 GN=CANX PE=1 SV=2	NA	#CGVWQR	NA	1	NA	0.75	0.75	NA	NA
O75534	53	CSDE1	CSDE1_C53	CSDE1_HUMAN Cold shock domain-containing protein E1 OS=Homo sapiens OX=9606 GN=CSDE1 PE=1 SV=2	NA	#CSQYNGNLQDLK	NA	1	NA	0.75	0.75	NA	NA
O75448	134	MED24	MED24_C134	MED24_HUMAN Mediator of RNA polymerase II transcription subunit 24 OS=Homo sapiens OX=9606 GN=MED24 PE=1 SV=1	NA	#CTAASAER	NA	1	NA	0.75	0.75	NA	NA
P30520	60	ADSS	ADSS_C60	PURA2_HUMAN Adenylosuccinate synthetase isozyme 2 OS=Homo sapiens OX=9606 GN=ADSS PE=1 SV=3	#CQGGNNAGHTVVVD #CQGGNNAGHTV	NA	2	NA	0.745	NA	0.745	NA	NA
P39023	336	RPL3	RPL3_C336	RL3_HUMAN 60S ribosomal protein L3 OS=Homo sapiens OX=9606 GN=RPL3 PE=1 SV=2	#CVVGTK	#CVVGTK	2	1	0.65	0.84	0.745	0.13435	18.0336
O14602	51	EIF1AY	EIF1AY_C51	IF1AY_HUMAN Eukaryotic translation initiation factor 1A, Y-chromosomal OS=Homo sapiens OX=9606 GN=EIF1AY PE=1 SV=4	#CFDGVK	#CFDGVK	1	1	0.6	0.89	0.745	0.205061	27.525
P13797	463	PLS3	PLS3_C463	PLST_HUMAN Plastin-3 OS=Homo sapiens OX=9606 GN=PLS3 PE=1 SV=4	#CNYAVELGK	#CNYAVELGK	1	1	1	0.48	0.74	0.367696	49.6886
Q96EL3	49	MRPL53	MRPL53_C49	RM53_HUMAN 39S ribosomal protein L53, mitochondrial OS=Homo sapiens OX=9606 GN=MRPL53 PE=1 SV=1	#CSVIADVR	#CSVIADVR	1	1	0.85	0.63	0.74	0.155563	21.0221
P16615	420	ATP2A2	ATP2A2_C420	AT2A2_HUMAN Sarcoplasmic/endoplasmic reticulum calcium ATPase 2 OS=Homo sapiens OX=9606 GN=ATP2A2 PE=1 SV=1	#CNDSALDYNEAK	#CNDSALDYNEAK	1	1	0.84	0.64	0.74	0.141421	19.111
Q96LW7	111	CARD19	CARD19_C111	CAR19_HUMAN Caspase recruitment domain-containing protein 19 OS=Homo sapiens OX=9606 GN=CARD19 PE=1 SV=1	#CLVLAR	#CLVLAR	2	1	0.8	0.68	0.74	0.0848528	11.4666
P21333	733	FLNA	FLNA_C733	FLNA_HUMAN Filamin-A OS=Homo sapiens OX=9606 GN=FLNA PE=1 SV=4	#CSYVPR	NA	2	NA	0.74	NA	0.74	NA	NA
P30154	186	PPP2R1B	PPP2R1B_C186	2AAB_HUMAN Serine/threonine-protein phosphatase 2A 65 kDa regulatory subunit A beta isoform OS=Homo sapiens OX=9606 GN=PPP2R1B PE=1 SV=3	#CSDDTPMVR	NA	6	NA	0.74	NA	0.74	NA	NA
Q96DG6	222	CMBL	CMBL_C222	CMBL_HUMAN Carboxymethylenebutenolidase homolog OS=Homo sapiens OX=9606 GN=CMBL PE=1 SV=1	#CSPADKPYIDEAR	NA	1	NA	0.74	NA	0.74	NA	NA
Q99460	112	PSMD1	PSMD1_C112	PSMD1_HUMAN 26S proteasome non-ATPase regulatory subunit 1 OS=Homo sapiens OX=9606 GN=PSMD1 PE=1 SV=2	#CVENADLPEGEK	NA	1	NA	0.74	NA	0.74	NA	NA
O75306	146	NDUFS2	NDUFS2_C146	NDUS2_HUMAN NADH dehydrogenase [ubiquinone] iron-sulfur protein 2, mitochondrial OS=Homo sapiens OX=9606 GN=NDUFS2 PE=1 SV=2	#CNEQAYSLAVEK	NA	1	NA	0.74	NA	0.74	NA	NA
P35270	133	SPR	SPR_C133	SPRE_HUMAN Sepiapterin reductase OS=Homo sapiens OX=9606 GN=SPR PE=1 SV=1	#CLTSSVLK	NA	1	NA	0.74	NA	0.74	NA	NA
Q14790	360	CASP8	CASP8_C360	CASP8_HUMAN Caspase-8 OS=Homo sapiens OX=9606 GN=CASP8 PE=1 SV=1	#CQGDNYQK	NA	1	NA	0.74	NA	0.74	NA	NA
Q8IWE2	34	FAM114A1	FAM114A1_C34	NXP20_HUMAN Protein NOXP20 OS=Homo sapiens OX=9606 GN=FAM114A1 PE=1 SV=2	#CDSAAVSHEPTPADPR	NA	2	NA	0.74	NA	0.74	NA	NA
Q96EE3	315	SEH1L	SEH1L_C315	SEH1_HUMAN Nucleoporin SEH1 OS=Homo sapiens OX=9606 GN=SEH1L PE=1 SV=3	#CTGLLK	#CTGILK	1	1	0.73	0.75	0.74	0.0141421	1.9111
Q15654	339	TRIP6	TRIP6_C339	TRIP6_HUMAN Thyroid receptor-interacting protein 6 OS=Homo sapiens OX=9606 GN=TRIP6 PE=1 SV=3	NA	#CATCSQPILDR	NA	2	NA	0.74	0.74	NA	NA
Q7KZF4	31	SND1	SND1_C31	SND1_HUMAN Staphylococcal nuclease domain-containing protein 1 OS=Homo sapiens OX=9606 GN=SND1 PE=1 SV=1	NA	#CAIIVR	NA	1	NA	0.74	0.74	NA	NA
Q01518	356	CAP1	CAP1_C356	CAP1_HUMAN Adenylyl cyclase-associated protein 1 OS=Homo sapiens OX=9606 GN=CAP1 PE=1 SV=5	NA	#CVNTTLQIK	NA	2	NA	0.74	0.74	NA	NA
Q9NZI7	188	UBP1	UBP1_C188	UBIP1_HUMAN Upstream-binding protein 1 OS=Homo sapiens OX=9606 GN=UBP1 PE=1 SV=1	NA	#CISTEFTPR	NA	1	NA	0.74	0.74	NA	NA
Q13155	306	AIMP2	AIMP2_C306	AIMP2_HUMAN Aminoacyl tRNA synthase complex-interacting multifunctional protein 2 OS=Homo sapiens OX=9606 GN=AIMP2 PE=1 SV=2	NA	#CENLAPFNTALK	NA	2	NA	0.74	0.74	NA	NA
Q00610	753	CLTC	CLTC_C753	CLH1_HUMAN Clathrin heavy chain 1 OS=Homo sapiens OX=9606 GN=CLTC PE=1 SV=5	NA	#CYDPER	NA	1	NA	0.74	0.74	NA	NA
P05388	27	RPLP0	RPLP0_C27	RLA0_HUMAN 60S acidic ribosomal protein P0 OS=Homo sapiens OX=9606 GN=RPLP0 PE=1 SV=1	#CFIVGADNVGSK	#CFIVGADNVGSK	3	6	0.73	0.745	0.7375	0.0106066	1.43818
Q8NFF5	561	FLAD1	FLAD1_C561	FAD1_HUMAN FAD synthase OS=Homo sapiens OX=9606 GN=FLAD1 PE=1 SV=1	#CLSPGGHPTYRPA	#CLSPGGHPTYRPA	5	2	0.91	0.56	0.735	0.247487	33.6718
P16615	595	ATP2A2	ATP2A2_C595	AT2A2_HUMAN Sarcoplasmic/endoplasmic reticulum calcium ATPase 2 OS=Homo sapiens OX=9606 GN=ATP2A2 PE=1 SV=1	#CVGMLDPPR	#CVGMLDPPR	2	1	0.79	0.68	0.735	0.0777817	10.5826
Q9UL46	91	PSME2	PSME2_C91	PSME2_HUMAN Proteasome activator complex subunit 2 OS=Homo sapiens OX=9606 GN=PSME2 PE=1 SV=4	#CGFLPGNEK	#CGFLPGNEK	3	2	0.73	0.735	0.7325	0.00353553	0.482667
O14576	550	DYNC1I1	DYNC1I1_C550	DC1I1_HUMAN Cytoplasmic dynein 1 intermediate chain 1 OS=Homo sapiens OX=9606 GN=DYNC1I1 PE=1 SV=2	#CVDGMGR	#CVDGMGR	1	1	0.79	0.67	0.73	0.0848528	11.6237
Q9Y4A5	1315	TRRAP	TRRAP_C1315	TRRAP_HUMAN Transformation/transcription domain-associated protein OS=Homo sapiens OX=9606 GN=TRRAP PE=1 SV=3	#CTTLQPR	NA	1	NA	0.73	NA	0.73	NA	NA
Q9UBD5	346	ORC3	ORC3_C346	ORC3_HUMAN Origin recognition complex subunit 3 OS=Homo sapiens OX=9606 GN=ORC3 PE=1 SV=1	#CNLPEAK	NA	1	NA	0.73	NA	0.73	NA	NA
Q8N1G0	1003	ZNF687	ZNF687_C1003	ZN687_HUMAN Zinc finger protein 687 OS=Homo sapiens OX=9606 GN=ZNF687 PE=1 SV=1	#CSAPSLR	NA	1	NA	0.73	NA	0.73	NA	NA
P43487	132	RANBP1	RANBP1_C132	RANG_HUMAN Ran-specific GTPase-activating protein OS=Homo sapiens OX=9606 GN=RANBP1 PE=1 SV=1	#CPKPELLAIR	NA	1	NA	0.73	NA	0.73	NA	NA
Q9UBQ5	190	EIF3K	EIF3K_C190	EIF3K_HUMAN Eukaryotic translation initiation factor 3 subunit K OS=Homo sapiens OX=9606 GN=EIF3K PE=1 SV=1	#CSQEESIKPK	NA	3	NA	0.73	NA	0.73	NA	NA
Q9BQ61	165	TRIR	TRIR_C165	TRIR_HUMAN Telomerase RNA component interacting RNase OS=Homo sapiens OX=9606 GN=TRIR PE=1 SV=1	#CGDDDKTRPLVK	NA	1	NA	0.73	NA	0.73	NA	NA
P29401	133	TKT	TKT_C133	TKT_HUMAN Transketolase OS=Homo sapiens OX=9606 GN=TKT PE=1 SV=3	#CGMAYTGK	#CGMAYTGK	3	2	0.71	0.75	0.73	0.0282843	3.87456
O43390	226	HNRNPR	HNRNPR_C226	HNRPR_HUMAN Heterogeneous nuclear ribonucleoprotein R OS=Homo sapiens OX=9606 GN=HNRNPR PE=1 SV=1	#CDSYEIRPGK	#CDSYEIRPGK	1	2	0.46	1	0.73	0.381838	52.3065
Q9P2K8	285	EIF2AK4	EIF2AK4_C285	E2AK4_HUMAN eIF-2-alpha kinase GCN2 OS=Homo sapiens OX=9606 GN=EIF2AK4 PE=1 SV=3	NA	#CIGSDEQLGK	NA	1	NA	0.73	0.73	NA	NA
Q8IWA0	12	WDR75	WDR75_C12	WDR75_HUMAN WD repeat-containing protein 75 OS=Homo sapiens OX=9606 GN=WDR75 PE=1 SV=1	NA	#CGGSELNFR	NA	2	NA	0.73	0.73	NA	NA
Q12802	272	AKAP13	AKAP13_C272	AKP13_HUMAN A-kinase anchor protein 13 OS=Homo sapiens OX=9606 GN=AKAP13 PE=1 SV=2	NA	#CTGPIFK	NA	1	NA	0.73	0.73	NA	NA
Q99758	744	ABCA3	ABCA3_C744	ABCA3_HUMAN ATP-binding cassette sub-family A member 3 OS=Homo sapiens OX=9606 GN=ABCA3 PE=1 SV=2	NA	#CGSSLFLK	NA	1	NA	0.73	0.73	NA	NA
O43513	51	MED7	MED7_C51	MED7_HUMAN Mediator of RNA polymerase II transcription subunit 7 OS=Homo sapiens OX=9606 GN=MED7 PE=1 SV=1	NA	#CDDLIIRPL	NA	1	NA	0.73	0.73	NA	NA
Q16643	98	DBN1	DBN1_C98	DREB_HUMAN Drebrin OS=Homo sapiens OX=9606 GN=DBN1 PE=1 SV=4	NA	#CASHVAK	NA	1	NA	0.73	0.73	NA	NA
P62424	199	RPL7A	RPL7A_C199	RL7A_HUMAN 60S ribosomal protein L7a OS=Homo sapiens OX=9606 GN=RPL7A PE=1 SV=2	#CTTVAFTQVNSEDK	#CTTVAFTQVNSEDK	2	2	0.79	0.66	0.725	0.0919239	12.6792
O43837	233	IDH3B	IDH3B_C233	IDH3B_HUMAN Isocitrate dehydrogenase [NAD] subunit beta, mitochondrial OS=Homo sapiens OX=9606 GN=IDH3B PE=1 SV=2	#CEEVAELYPK	#CEEVAELYPK	2	3	0.79	0.66	0.725	0.0919239	12.6792
P52815	45	MRPL12	MRPL12_C45	RM12_HUMAN 39S ribosomal protein L12, mitochondrial OS=Homo sapiens OX=9606 GN=MRPL12 PE=1 SV=2	#CEALAGAPLDNAPK	#CEALAGAPLDNAPK	3	4	0.76	0.69	0.725	0.0494975	6.82724
O15270	438	SPTLC2	SPTLC2_C438	SPTC2_HUMAN Serine palmitoyltransferase 2 OS=Homo sapiens OX=9606 GN=SPTLC2 PE=1 SV=1	#CVQQLAENTR	#CVQQLAENTR	2	2	0.72	0.73	0.725	0.00707107	0.97532
P16152	150	CBR1	CBR1_C150	CBR1_HUMAN Carbonyl reductase [NADPH] 1 OS=Homo sapiens OX=9606 GN=CBR1 PE=1 SV=3	#CSPELQQK	#CSPELQQK	1	3	0.33	1.11	0.72	0.551543	76.6032
Q92973	620	TNPO1	TNPO1_C620	TNPO1_HUMAN Transportin-1 OS=Homo sapiens OX=9606 GN=TNPO1 PE=1 SV=2	#CVNLVQK	NA	1	NA	0.72	NA	0.72	NA	NA
Q9BPX3	611	NCAPG	NCAPG_C611	CND3_HUMAN Condensin complex subunit 3 OS=Homo sapiens OX=9606 GN=NCAPG PE=1 SV=1	#CGLQNQDFAR	NA	1	NA	0.72	NA	0.72	NA	NA
Q9NQS1	251	AVEN	AVEN_C251	AVEN_HUMAN Cell death regulator Aven OS=Homo sapiens OX=9606 GN=AVEN PE=1 SV=1	#CPVLLGK	NA	1	NA	0.72	NA	0.72	NA	NA
Q86UK7	247	ZNF598	ZNF598_C247	ZN598_HUMAN E3 ubiquitin-protein ligase ZNF598 OS=Homo sapiens OX=9606 GN=ZNF598 PE=1 SV=1	#CSTEQFTHAFR	NA	1	NA	0.72	NA	0.72	NA	NA
Q05397	658	PTK2	PTK2_C658	FAK1_HUMAN Focal adhesion kinase 1 OS=Homo sapiens OX=9606 GN=PTK2 PE=1 SV=2	#CWAYDPSR	NA	1	NA	0.72	NA	0.72	NA	NA
Q92499	194	DDX1	DDX1_C194	DDX1_HUMAN ATP-dependent RNA helicase DDX1 OS=Homo sapiens OX=9606 GN=DDX1 PE=1 SV=2	#CYLDIDK	NA	1	NA	0.72	NA	0.72	NA	NA
P31153	34	MAT2A	MAT2A_C34	METK2_HUMAN S-adenosylmethionine synthase isoform type-2 OS=Homo sapiens OX=9606 GN=MAT2A PE=1 SV=1	#CDQISDAVLDAHLQQDPDAK	NA	2	NA	0.72	NA	0.72	NA	NA
Q9Y678	325	COPG1	COPG1_C325	COPG1_HUMAN Coatomer subunit gamma-1 OS=Homo sapiens OX=9606 GN=COPG1 PE=1 SV=1	#CNLDLENLVTDSNR	NA	2	NA	0.72	NA	0.72	NA	NA
Q9H6L2	186	TMEM231	TMEM231_C186	TM231_HUMAN Transmembrane protein 231 OS=Homo sapiens OX=9606 GN=TMEM231 PE=1 SV=1	#CGGLDAR	NA	1	NA	0.72	NA	0.72	NA	NA
Q96T51	320	RUFY1	RUFY1_C320	RUFY1_HUMAN RUN and FYVE domain-containing protein 1 OS=Homo sapiens OX=9606 GN=RUFY1 PE=1 SV=2	NA	#CTVGDLQTK	NA	3	NA	0.72	0.72	NA	NA
Q9C0C9	1099	UBE2O	UBE2O_C1099	UBE2O_HUMAN (E3-independent) E2 ubiquitin-conjugating enzyme OS=Homo sapiens OX=9606 GN=UBE2O PE=1 SV=3	NA	#CYNEMALIR	NA	1	NA	0.72	0.72	NA	NA
P50213	351	IDH3A	IDH3A_C351	IDH3A_HUMAN Isocitrate dehydrogenase [NAD] subunit alpha, mitochondrial OS=Homo sapiens OX=9606 GN=IDH3A PE=1 SV=1	NA	#CSDFTEEICR	NA	2	NA	0.72	0.72	NA	NA
Q5VTL8	29	PRPF38B	PRPF38B_C29	PR38B_HUMAN Pre-mRNA-splicing factor 38B OS=Homo sapiens OX=9606 GN=PRPF38B PE=1 SV=1	NA	#CGGGGATK	NA	1	NA	0.72	0.72	NA	NA
P50991	252	CCT4	CCT4_C252	TCPD_HUMAN T-complex protein 1 subunit delta OS=Homo sapiens OX=9606 GN=CCT4 PE=1 SV=4	NA	#CLSAPK	NA	1	NA	0.72	0.72	NA	NA
O15371	375	EIF3D	EIF3D_C375	EIF3D_HUMAN Eukaryotic translation initiation factor 3 subunit D OS=Homo sapiens OX=9606 GN=EIF3D PE=1 SV=1	#CEHDGVMTGANGEVSFINIK	#CEHDGVMTGANGEVSFINIK	1	2	0.65	0.78	0.715	0.0919239	12.8565
O43660	338	PLRG1	PLRG1_C338	PLRG1_HUMAN Pleiotropic regulator 1 OS=Homo sapiens OX=9606 GN=PLRG1 PE=1 SV=1	#CQAAEPQIITGSHDTTIR	#CQAAEPQIITGSHDTTIR	1	3	0.74	0.69	0.715	0.0353553	4.9448
Q13617	46	CUL2	CUL2_C46	CUL2_HUMAN Cullin-2 OS=Homo sapiens OX=9606 GN=CUL2 PE=1 SV=2	#CVAYPEPLGER	#CVAYPEPLGER	1	1	0.78	0.64	0.71	0.0989949	13.943
P52209	402	PGD	PGD_C402	6PGD_HUMAN 6-phosphogluconate dehydrogenase, decarboxylating OS=Homo sapiens OX=9606 GN=PGD PE=1 SV=3	#CQDSWR	#CQDSWR	2	2	0.75	0.67	0.71	0.0565685	7.9674
P18031	121	PTPN1	PTPN1_C121	PTN1_HUMAN Tyrosine-protein phosphatase non-receptor type 1 OS=Homo sapiens OX=9606 GN=PTPN1 PE=1 SV=1	#CAQYWPQKEEK #CAQYWPQK	NA	2	NA	0.71	NA	0.71	NA	NA
P63010	95	AP2B1	AP2B1_C95	AP2B1_HUMAN AP-2 complex subunit beta OS=Homo sapiens OX=9606 GN=AP2B1 PE=1 SV=1	#CEDPNPLIR	NA	1	NA	0.71	NA	0.71	NA	NA
P50748	390	KNTC1	KNTC1_C390	KNTC1_HUMAN Kinetochore-associated protein 1 OS=Homo sapiens OX=9606 GN=KNTC1 PE=1 SV=1	#CLTEALPENR	NA	1	NA	0.71	NA	0.71	NA	NA
O94826	136	TOMM70	TOMM70_C136	TOM70_HUMAN Mitochondrial import receptor subunit TOM70 OS=Homo sapiens OX=9606 GN=TOMM70 PE=1 SV=1	#CYTEAISLCPTEK	NA	1	NA	0.71	NA	0.71	NA	NA
Q14146	324	URB2	URB2_C324	URB2_HUMAN Unhealthy ribosome biogenesis protein 2 homolog OS=Homo sapiens OX=9606 GN=URB2 PE=1 SV=2	#CFQVLPR	NA	1	NA	0.71	NA	0.71	NA	NA
P46782	172	RPS5	RPS5_C172	RS5_HUMAN 40S ribosomal protein S5 OS=Homo sapiens OX=9606 GN=RPS5 PE=1 SV=4	#CLADELINAAK	NA	1	NA	0.71	NA	0.71	NA	NA
Q9BTY7	163	HGH1	HGH1_C163	HGH1_HUMAN Protein HGH1 homolog OS=Homo sapiens OX=9606 GN=HGH1 PE=1 SV=1	#CTPGYNAR	NA	1	NA	0.71	NA	0.71	NA	NA
O94906	837	PRPF6	PRPF6_C837	PRP6_HUMAN Pre-mRNA-processing factor 6 OS=Homo sapiens OX=9606 GN=PRPF6 PE=1 SV=1	NA	#CEHDPHVLLAVAK	NA	1	NA	0.71	0.71	NA	NA
O00429	446	DNM1L	DNM1L_C446	DNM1L_HUMAN Dynamin-1-like protein OS=Homo sapiens OX=9606 GN=DNM1L PE=1 SV=2	NA	#CSNYSTQELLR	NA	2	NA	0.71	0.71	NA	NA
Q8N1F7	328	NUP93	NUP93_C328	NUP93_HUMAN Nuclear pore complex protein Nup93 OS=Homo sapiens OX=9606 GN=NUP93 PE=1 SV=2	NA	#CGDLLAASQVVNR	NA	4	NA	0.71	0.71	NA	NA
O60341	573	KDM1A	KDM1A_C573	KDM1A_HUMAN Lysine-specific histone demethylase 1A OS=Homo sapiens OX=9606 GN=KDM1A PE=1 SV=2	NA	#CVPVALAEGLDIK	NA	1	NA	0.71	0.71	NA	NA
P62854	77	RPS26	RPS26_C77	RS26_HUMAN 40S ribosomal protein S26 OS=Homo sapiens OX=9606 GN=RPS26 PE=1 SV=3	NA	#CAIHSK	NA	1	NA	0.71	0.71	NA	NA
Q15417	173	CNN3	CNN3_C173	CNN3_HUMAN Calponin-3 OS=Homo sapiens OX=9606 GN=CNN3 PE=1 SV=1	NA	#CASQAGMTAYGTR	NA	1	NA	0.71	0.71	NA	NA
Q15024	85	EXOSC7	EXOSC7_C85	EXOS7_HUMAN Exosome complex component RRP42 OS=Homo sapiens OX=9606 GN=EXOSC7 PE=1 SV=3	#CSASATPEFEGR	#CSASATPEFEGR	1	2	0.77	0.64	0.705	0.0919239	13.0388
Q9BXJ8	47	TMEM120A	TMEM120A_C47	T120A_HUMAN Transmembrane protein 120A OS=Homo sapiens OX=9606 GN=TMEM120A PE=1 SV=1	#CTSSITR	#CTSSITR	1	1	0.66	0.75	0.705	0.0636396	9.0269
P11413	232	G6PD	G6PD_C232	G6PD_HUMAN Glucose-6-phosphate 1-dehydrogenase OS=Homo sapiens OX=9606 GN=G6PD PE=1 SV=4	#CVILTFK	#CVILTFK	2	1	0.65	0.76	0.705	0.0777817	11.0329
O75369	660	FLNB	FLNB_C660	FLNB_HUMAN Filamin-B OS=Homo sapiens OX=9606 GN=FLNB PE=1 SV=2	#CIVNNL #CIVNNLAEFTVDPK	#CIVNNLAEFTVDPK	3	3	0.71	0.7	0.705	0.00707107	1.00299
P35579	671	MYH9	MYH9_C671	MYH9_HUMAN Myosin-9 OS=Homo sapiens OX=9606 GN=MYH9 PE=1 SV=4	#CIIPNHEK	#CIIPNHEK	5	5	0.7	0.71	0.705	0.00707107	1.00299
Q9Y320	186	TMX2	TMX2_C186	TMX2_HUMAN Thioredoxin-related transmembrane protein 2 OS=Homo sapiens OX=9606 GN=TMX2 PE=1 SV=1	#CTGLNFGK	#CTGLNFGK	1	2	0.9	0.5	0.7	0.282843	40.4061
Q14204	3940	DYNC1H1	DYNC1H1_C3940	DYHC1_HUMAN Cytoplasmic dynein 1 heavy chain 1 OS=Homo sapiens OX=9606 GN=DYNC1H1 PE=1 SV=5	#CLPAFK	#CLPAFK	1	6	0.75	0.65	0.7	0.0707107	10.1015
P25398	106	RPS12	RPS12_C106	RS12_HUMAN 40S ribosomal protein S12 OS=Homo sapiens OX=9606 GN=RPS12 PE=1 SV=3	#CSCVVVK	NA	1	NA	0.7	NA	0.7	NA	NA
Q9BPX6	62	MICU1	MICU1_C62	MICU1_HUMAN Calcium uptake protein 1, mitochondrial OS=Homo sapiens OX=9606 GN=MICU1 PE=1 SV=1	#CVDNLK	NA	2	NA	0.7	NA	0.7	NA	NA
Q8TDB6	219	DTX3L	DTX3L_C219	DTX3L_HUMAN E3 ubiquitin-protein ligase DTX3L OS=Homo sapiens OX=9606 GN=DTX3L PE=1 SV=1	#CISPSEPETK	NA	1	NA	0.7	NA	0.7	NA	NA
Q8WUA4	310	GTF3C2	GTF3C2_C310	TF3C2_HUMAN General transcription factor 3C polypeptide 2 OS=Homo sapiens OX=9606 GN=GTF3C2 PE=1 SV=2	#CLHLTK	NA	1	NA	0.7	NA	0.7	NA	NA
Q15029	166	EFTUD2	EFTUD2_C166	U5S1_HUMAN 116 kDa U5 small nuclear ribonucleoprotein component OS=Homo sapiens OX=9606 GN=EFTUD2 PE=1 SV=1	#CYTDILFTEQER	NA	1	NA	0.7	NA	0.7	NA	NA
Q9Y223	183	GNE	GNE_C183	GLCNE_HUMAN Bifunctional UDP-N-acetylglucosamine 2-epimerase/N-acetylmannosamine kinase OS=Homo sapiens OX=9606 GN=GNE PE=1 SV=1	#CPSYDK	NA	1	NA	0.7	NA	0.7	NA	NA
P30876	224	POLR2B	POLR2B_C224	RPB2_HUMAN DNA-directed RNA polymerase II subunit RPB2 OS=Homo sapiens OX=9606 GN=POLR2B PE=1 SV=1	#CLENSSR	NA	1	NA	0.7	NA	0.7	NA	NA
P27695	208	APEX1	APEX1_C208	APEX1_HUMAN DNA-(apurinic or apyrimidinic site) lyase OS=Homo sapiens OX=9606 GN=APEX1 PE=1 SV=2	NA	#CGDLNVAHEEIDLR	NA	1	NA	0.7	0.7	NA	NA
Q70IA6	208	MOB2	MOB2_C208	MOB2_HUMAN MOB kinase activator 2 OS=Homo sapiens OX=9606 GN=MOB2 PE=1 SV=1	NA	#CSGAGGVH	NA	1	NA	0.7	0.7	NA	NA
P55036	9	PSMD4	PSMD4_C9	PSMD4_HUMAN 26S proteasome non-ATPase regulatory subunit 4 OS=Homo sapiens OX=9606 GN=PSMD4 PE=1 SV=1	NA	#CVDNSEYMR	NA	1	NA	0.7	0.7	NA	NA
Q8WV74	207	NUDT8	NUDT8_C207	NUDT8_HUMAN Nucleoside diphosphate-linked moiety X motif 8 OS=Homo sapiens OX=9606 GN=NUDT8 PE=1 SV=2	NA	#CSGAEGLAR	NA	1	NA	0.7	0.7	NA	NA
P42704	484	LRPPRC	LRPPRC_C484	LPPRC_HUMAN Leucine-rich PPR motif-containing protein, mitochondrial OS=Homo sapiens OX=9606 GN=LRPPRC PE=1 SV=3	#CFDSVNSAR	#CFDSVNSAR	1	1	0.74	0.65	0.695	0.0636396	9.15678
Q02297	401	NRG1	NRG1_C401	NRG1_HUMAN Pro-neuregulin-1, membrane-bound isoform OS=Homo sapiens OX=9606 GN=NRG1 PE=1 SV=3	#CNSFLR	#CNSFLR	1	1	1.07	0.31	0.69	0.537401	77.8842
Q9Y2A7	622	NCKAP1	NCKAP1_C622	NCKP1_HUMAN Nck-associated protein 1 OS=Homo sapiens OX=9606 GN=NCKAP1 PE=1 SV=1	#CTLSDQLLPK	#CTLSDQLLPK	2	1	0.77	0.61	0.69	0.113137	16.3967
Q9Y496	621	KIF3A	KIF3A_C621	KIF3A_HUMAN Kinesin-like protein KIF3A OS=Homo sapiens OX=9606 GN=KIF3A PE=1 SV=4	#CVAYTGNNMR	#CVAYTGNNMR	1	1	0.76	0.62	0.69	0.0989949	14.3471
P22102	646	GART	GART_C646	PUR2_HUMAN Trifunctional purine biosynthetic protein adenosine-3 OS=Homo sapiens OX=9606 GN=GART PE=1 SV=1	#CGDQTLGDLLLTPTR	#CGDQTLGDLLLTPTR	2	3	0.71	0.67	0.69	0.0282843	4.09917
Q9UL63	446	MKLN1	MKLN1_C446	MKLN1_HUMAN Muskelin OS=Homo sapiens OX=9606 GN=MKLN1 PE=1 SV=2	#CNAGPEDIQSR	NA	1	NA	0.69	NA	0.69	NA	NA
O75947	101	ATP5PD	ATP5PD_C101	ATP5H_HUMAN ATP synthase subunit d, mitochondrial OS=Homo sapiens OX=9606 GN=ATP5PD PE=1 SV=3	#CAEWVSLSK	#CAEWVSLSK	1	2	0.69	0.69	0.69	0	0
Q09161	436	NCBP1	NCBP1_C436	NCBP1_HUMAN Nuclear cap-binding protein subunit 1 OS=Homo sapiens OX=9606 GN=NCBP1 PE=1 SV=1	#CLSQDPESPKPK	NA	1	NA	0.69	NA	0.69	NA	NA
P48506	257	GCLC	GCLC_C257	GSH1_HUMAN Glutamate--cysteine ligase catalytic subunit OS=Homo sapiens OX=9606 GN=GCLC PE=1 SV=2	#CSISEAR	NA	1	NA	0.69	NA	0.69	NA	NA
Q9Y3B2	15	EXOSC1	EXOSC1_C15	EXOS1_HUMAN Exosome complex component CSL4 OS=Homo sapiens OX=9606 GN=EXOSC1 PE=1 SV=1	NA	#CNLEEGSPGSGTYTR	NA	1	NA	0.69	0.69	NA	NA
P11310	159	ACADM	ACADM_C159	ACADM_HUMAN Medium-chain specific acyl-CoA dehydrogenase, mitochondrial OS=Homo sapiens OX=9606 GN=ACADM PE=1 SV=1	NA	#CVTEPGAGSDVAGIK	NA	2	NA	0.69	0.69	NA	NA
Q8TB22	621	SPATA20	SPATA20_C621	SPT20_HUMAN Spermatogenesis-associated protein 20 OS=Homo sapiens OX=9606 GN=SPATA20 PE=2 SV=3	NA	#CSEAELGAGLPLR	NA	1	NA	0.69	0.69	NA	NA
Q08J23	502	NSUN2	NSUN2_C502	NSUN2_HUMAN tRNA (cytosine(34)-C(5))-methyltransferase OS=Homo sapiens OX=9606 GN=NSUN2 PE=1 SV=2	NA	#CGPPPSK	NA	1	NA	0.69	0.69	NA	NA
Q9BXJ9	491	NAA15	NAA15_C491	NAA15_HUMAN N-alpha-acetyltransferase 15, NatA auxiliary subunit OS=Homo sapiens OX=9606 GN=NAA15 PE=1 SV=1	NA	#CAQAYK	NA	1	NA	0.69	0.69	NA	NA
P0DMV8	306	HSPA1A	HSPA1A_C306	HS71A_HUMAN Heat shock 70 kDa protein 1A OS=Homo sapiens OX=9606 GN=HSPA1A PE=1 SV=1	#CSDIFR	#CSDIFR	2	2	0.655	0.72	0.6875	0.0459619	6.68537
Q96HC4	570	PDLIM5	PDLIM5_C570	PDLI5_HUMAN PDZ and LIM domain protein 5 OS=Homo sapiens OX=9606 GN=PDLIM5 PE=1 SV=5	#CESLEGQTFFSK	#CESLEGQTFFSK	2	1	0.495	0.88	0.6875	0.272236	39.598
Q9UHI6	98	DDX20	DDX20_C98	DDX20_HUMAN Probable ATP-dependent RNA helicase DDX20 OS=Homo sapiens OX=9606 GN=DDX20 PE=1 SV=2	#CGLDLIVQAK	#CGLDLIVQAK	2	1	0.69	0.68	0.685	0.00707107	1.03227
Q99714	91	HSD17B10	HSD17B10_C91	HCD2_HUMAN 3-hydroxyacyl-CoA dehydrogenase type-2 OS=Homo sapiens OX=9606 GN=HSD17B10 PE=1 SV=3	#CAGIAVASK	#CAGIAVASK	2	2	0.68	0.69	0.685	0.00707107	1.03227
P68104	411	EEF1A1	EEF1A1_C411	EF1A1_HUMAN Elongation factor 1-alpha 1 OS=Homo sapiens OX=9606 GN=EEF1A1 PE=1 SV=1	#CVESFSDYPPLGR	#CVESFSD #CVESFSDY #CVESFSDYPPLGR	17	24	0.68	0.69	0.685	0.00707107	1.03227
Q15365	109	PCBP1	PCBP1_C109	PCBP1_HUMAN Poly(rC)-binding protein 1 OS=Homo sapiens OX=9606 GN=PCBP1 PE=1 SV=2	#CGSLIGK	#CGSLIGK	3	3	0.67	0.7	0.685	0.0212132	3.09682
P49773	84	HINT1	HINT1_C84	HINT1_HUMAN Histidine triad nucleotide-binding protein 1 OS=Homo sapiens OX=9606 GN=HINT1 PE=1 SV=2	#CAADLGLNK	#CAADLGLNK	3	2	0.66	0.71	0.685	0.0353553	5.16136
P60660	32	MYL6	MYL6_C32	MYL6_HUMAN Myosin light polypeptide 6 OS=Homo sapiens OX=9606 GN=MYL6 PE=1 SV=2	#CGDVMR	#CGDVMR	2	1	0.62	0.75	0.685	0.0919239	13.4195
Q99714	58	HSD17B10	HSD17B10_C58	HCD2_HUMAN 3-hydroxyacyl-CoA dehydrogenase type-2 OS=Homo sapiens OX=9606 GN=HSD17B10 PE=1 SV=3	#CVFAPADVTSEK	#CVFAPADVTSEK	4	2	0.7	0.665	0.6825	0.0247487	3.62619
Q9UBS8	270	RNF14	RNF14_C270	RNF14_HUMAN E3 ubiquitin-protein ligase RNF14 OS=Homo sapiens OX=9606 GN=RNF14 PE=1 SV=1	#CPSVATPGQVK	#CPSVATPGQVK	1	1	0.68	0.68	0.68	0	0
P35579	468	MYH9	MYH9_C468	MYH9_HUMAN Myosin-9 OS=Homo sapiens OX=9606 GN=MYH9 PE=1 SV=4	#CINYTNEK	NA	1	NA	0.68	NA	0.68	NA	NA
P51649	342	ALDH5A1	ALDH5A1_C342	SSDH_HUMAN Succinate-semialdehyde dehydrogenase, mitochondrial OS=Homo sapiens OX=9606 GN=ALDH5A1 PE=1 SV=2	#CSNQFLVQR	NA	1	NA	0.68	NA	0.68	NA	NA
O15226	246	NKRF	NKRF_C246	NKRF_HUMAN NF-kappa-B-repressing factor OS=Homo sapiens OX=9606 GN=NKRF PE=1 SV=2	#CQNIYLTTGYAGSK	NA	1	NA	0.68	NA	0.68	NA	NA
P09110	218	ACAA1	ACAA1_C218	THIK_HUMAN 3-ketoacyl-CoA thiolase, peroxisomal OS=Homo sapiens OX=9606 GN=ACAA1 PE=1 SV=2	#CFQAEIVPVTTTVHDDK	NA	2	NA	0.68	NA	0.68	NA	NA
Q03252	212	LMNB2	LMNB2_C212	LMNB2_HUMAN Lamin-B2 OS=Homo sapiens OX=9606 GN=LMNB2 PE=1 SV=4	#CQSLQEELDFR	NA	2	NA	0.68	NA	0.68	NA	NA
Q92696	114	RABGGTA	RABGGTA_C114	PGTA_HUMAN Geranylgeranyl transferase type-2 subunit alpha OS=Homo sapiens OX=9606 GN=RABGGTA PE=1 SV=2	#CWLLGR	NA	1	NA	0.68	NA	0.68	NA	NA
O15068	706	MCF2L	MCF2L_C706	MCF2L_HUMAN Guanine nucleotide exchange factor DBS OS=Homo sapiens OX=9606 GN=MCF2L PE=1 SV=2	#CPELVGR	NA	1	NA	0.68	NA	0.68	NA	NA
Q8WTS1	140	ABHD5	ABHD5_C140	ABHD5_HUMAN 1-acylglycerol-3-phosphate O-acyltransferase ABHD5 OS=Homo sapiens OX=9606 GN=ABHD5 PE=1 SV=1	NA	#CALGLDK	NA	1	NA	0.68	0.68	NA	NA
Q15813	371	TBCE	TBCE_C371	TBCE_HUMAN Tubulin-specific chaperone E OS=Homo sapiens OX=9606 GN=TBCE PE=1 SV=1	NA	#CEILPEER	NA	2	NA	0.68	0.68	NA	NA
P62633	119	CNBP	CNBP_C119	CNBP_HUMAN Cellular nucleic acid-binding protein OS=Homo sapiens OX=9606 GN=CNBP PE=1 SV=1	NA	#CYSCGEFGHIQ	NA	2	NA	0.68	0.68	NA	NA
O00330	307	PDHX	PDHX_C307	ODPX_HUMAN Pyruvate dehydrogenase protein X component, mitochondrial OS=Homo sapiens OX=9606 GN=PDHX PE=1 SV=3	NA	#CDLGAVLK	NA	1	NA	0.68	0.68	NA	NA
P46937	343	YAP1	YAP1_C343	YAP1_HUMAN Transcriptional coactivator YAP1 OS=Homo sapiens OX=9606 GN=YAP1 PE=1 SV=2	#CQELALR	#CQELALR	1	2	0.66	0.7	0.68	0.0282843	4.15945
Q8NCE2	61	MTMR14	MTMR14_C61	MTMRE_HUMAN Myotubularin-related protein 14 OS=Homo sapiens OX=9606 GN=MTMR14 PE=1 SV=2	#CLELFGR	#CLELFGR	1	1	0.93	0.42	0.675	0.360624	53.4258
P35579	569	MYH9	MYH9_C569	MYH9_HUMAN Myosin-9 OS=Homo sapiens OX=9606 GN=MYH9 PE=1 SV=4	#CIIHYAGK	#CIIHYAGK	1	1	0.5	0.85	0.675	0.247487	36.6648
Q9BZL1	18	UBL5	UBL5_C18	UBL5_HUMAN Ubiquitin-like protein 5 OS=Homo sapiens OX=9606 GN=UBL5 PE=1 SV=1	#CNTDDTIGDLKK	NA	2	NA	0.67	NA	0.67	NA	NA
P43246	199	MSH2	MSH2_C199	MSH2_HUMAN DNA mismatch repair protein Msh2 OS=Homo sapiens OX=9606 GN=MSH2 PE=1 SV=1	#CVLPGGETAGDMGK	NA	1	NA	0.67	NA	0.67	NA	NA
Q9BZE4	174	GTPBP4	GTPBP4_C174	NOG1_HUMAN Nucleolar GTP-binding protein 1 OS=Homo sapiens OX=9606 GN=GTPBP4 PE=1 SV=3	NA	#CGYPNVGK	NA	1	NA	0.67	0.67	NA	NA
P78362	223	SRPK2	SRPK2_C223	SRPK2_HUMAN SRSF protein kinase 2 OS=Homo sapiens OX=9606 GN=SRPK2 PE=1 SV=3	NA	#CVDDAYVR	NA	2	NA	0.67	0.67	NA	NA
Q8TBB5	373	KLHDC4	KLHDC4_C373	KLDC4_HUMAN Kelch domain-containing protein 4 OS=Homo sapiens OX=9606 GN=KLHDC4 PE=1 SV=1	NA	#CGGAGTQGPVQLVK	NA	3	NA	0.67	0.67	NA	NA
Q86YV5	312	PRAG1	PRAG1_C312	PRAG1_HUMAN Inactive tyrosine-protein kinase PRAG1 OS=Homo sapiens OX=9606 GN=PRAG1 PE=1 SV=4	NA	#CSQGPTAHPS	NA	2	NA	0.67	0.67	NA	NA
Q9Y490	1363	TLN1	TLN1_C1363	TLN1_HUMAN Talin-1 OS=Homo sapiens OX=9606 GN=TLN1 PE=1 SV=3	NA	#CDNALR	NA	1	NA	0.67	0.67	NA	NA
P78316	457	NOP14	NOP14_C457	NOP14_HUMAN Nucleolar protein 14 OS=Homo sapiens OX=9606 GN=NOP14 PE=1 SV=3	#CNHPSLAEGNK	#CNHPSLAEGNK	2	2	0.65	0.69	0.67	0.0282843	4.22153
Q99439	175	CNN2	CNN2_C175	CNN2_HUMAN Calponin-2 OS=Homo sapiens OX=9606 GN=CNN2 PE=1 SV=4	#CASQSGMTAYGTR	#CASQSGMTAYGTR	1	1	0.77	0.56	0.665	0.148492	22.3297
P46777	144	RPL5	RPL5_C144	RL5_HUMAN 60S ribosomal protein L5 OS=Homo sapiens OX=9606 GN=RPL5 PE=1 SV=3	#CYLDAGLAR	#CYLDAGLAR	1	2	0.74	0.59	0.665	0.106066	15.9498
Q9BUH6	51	PAXX	PAXX_C51	PAXX_HUMAN Protein PAXX OS=Homo sapiens OX=9606 GN=PAXX PE=1 SV=2	#CFTPDSLAALK	#CFTPDSLAALK	1	2	0.48	0.85	0.665	0.26163	39.3428
P25398	69	RPS12	RPS12_C69	RS12_HUMAN 40S ribosomal protein S12 OS=Homo sapiens OX=9606 GN=RPS12 PE=1 SV=3	#CAEHQINLIK	#CAEHQINLIK	6	4	0.585	0.74	0.6625	0.109602	16.5436
Q9H3S7	425	PTPN23	PTPN23_C425	PTN23_HUMAN Tyrosine-protein phosphatase non-receptor type 23 OS=Homo sapiens OX=9606 GN=PTPN23 PE=1 SV=1	#CAALSVRPDTVR	NA	2	NA	0.66	NA	0.66	NA	NA
Q13813	2120	SPTAN1	SPTAN1_C2120	SPTN1_HUMAN Spectrin alpha chain, non-erythrocytic 1 OS=Homo sapiens OX=9606 GN=SPTAN1 PE=1 SV=3	#CNSLEEIK	NA	2	NA	0.66	NA	0.66	NA	NA
P21333	717	FLNA	FLNA_C717	FLNA_HUMAN Filamin-A OS=Homo sapiens OX=9606 GN=FLNA PE=1 SV=4	#CPVEALVK	NA	2	NA	0.66	NA	0.66	NA	NA
Q9BTW9	420	TBCD	TBCD_C420	TBCD_HUMAN Tubulin-specific chaperone D OS=Homo sapiens OX=9606 GN=TBCD PE=1 SV=2	#CLALAELGR	NA	1	NA	0.66	NA	0.66	NA	NA
Q96JB5	150	CDK5RAP3	CDK5RAP3_C150	CK5P3_HUMAN CDK5 regulatory subunit-associated protein 3 OS=Homo sapiens OX=9606 GN=CDK5RAP3 PE=1 SV=2	#CQAGAAEMR	NA	1	NA	0.66	NA	0.66	NA	NA
O75369	450	FLNB	FLNB_C450	FLNB_HUMAN Filamin-B OS=Homo sapiens OX=9606 GN=FLNB PE=1 SV=2	#CNPNACR	NA	1	NA	0.66	NA	0.66	NA	NA
Q9H7D7	493	WDR26	WDR26_C493	WDR26_HUMAN WD repeat-containing protein 26 OS=Homo sapiens OX=9606 GN=WDR26 PE=1 SV=3	#CISDGK	NA	3	NA	0.66	NA	0.66	NA	NA
P27797	105	CALR	CALR_C105	CALR_HUMAN Calreticulin OS=Homo sapiens OX=9606 GN=CALR PE=1 SV=1	#CGGGYVK	NA	1	NA	0.66	NA	0.66	NA	NA
Q92598	845	HSPH1	HSPH1_C845	HS105_HUMAN Heat shock protein 105 kDa OS=Homo sapiens OX=9606 GN=HSPH1 PE=1 SV=1	#CYPNEK	NA	1	NA	0.66	NA	0.66	NA	NA
O75879	228	GATB	GATB_C228	GATB_HUMAN Glutamyl-tRNA(Gln) amidotransferase subunit B, mitochondrial OS=Homo sapiens OX=9606 GN=GATB PE=1 SV=1	#CGEEAATAVR	NA	1	NA	0.66	NA	0.66	NA	NA
P15121	299	AKR1B1	AKR1B1_C299	ALDR_HUMAN Aldo-keto reductase family 1 member B1 OS=Homo sapiens OX=9606 GN=AKR1B1 PE=1 SV=3	#CALLSCTSHK	#CALLSCTSHK #CALLSCTSH	11	11	0.65	0.67	0.66	0.0141421	2.14275
Q9Y678	706	COPG1	COPG1_C706	COPG1_HUMAN Coatomer subunit gamma-1 OS=Homo sapiens OX=9606 GN=COPG1 PE=1 SV=1	NA	#CYTLVALPK	NA	1	NA	0.66	0.66	NA	NA
Q9BX95	27	SGPP1	SGPP1_C27	SGPP1_HUMAN Sphingosine-1-phosphate phosphatase 1 OS=Homo sapiens OX=9606 GN=SGPP1 PE=1 SV=2	NA	#CGVEAPPR	NA	2	NA	0.66	0.66	NA	NA
P62820	126	RAB1A	RAB1A_C126	RAB1A_HUMAN Ras-related protein Rab-1A OS=Homo sapiens OX=9606 GN=RAB1A PE=1 SV=3	NA	#CDLTTK	NA	2	NA	0.66	0.66	NA	NA
Q13415	469	ORC1	ORC1_C469	ORC1_HUMAN Origin recognition complex subunit 1 OS=Homo sapiens OX=9606 GN=ORC1 PE=1 SV=2	NA	#CAAPQIR	NA	1	NA	0.66	0.66	NA	NA
Q00610	491	CLTC	CLTC_C491	CLH1_HUMAN Clathrin heavy chain 1 OS=Homo sapiens OX=9606 GN=CLTC PE=1 SV=5	#CFAETGQVQK	#CFAETGQVQK	1	1	0.62	0.7	0.66	0.0565685	8.57099
Q96EQ0	38	SGTB	SGTB_C38	SGTB_HUMAN Small glutamine-rich tetratricopeptide repeat-containing protein beta OS=Homo sapiens OX=9606 GN=SGTB PE=1 SV=1	#CLETVFK	#CLETVFK	2	2	0.62	0.7	0.66	0.0565685	8.57099
P61247	96	RPS3A	RPS3A_C96	RS3A_HUMAN 40S ribosomal protein S3a OS=Homo sapiens OX=9606 GN=RPS3A PE=1 SV=2	#CLTNFHGM #CLTNFHGMDLTR	#CLTNFHGM #CLTNFHGMDLTR	6	8	0.66	0.655	0.6575	0.00353553	0.537724
Q9GZT3	48	SLIRP	SLIRP_C48	SLIRP_HUMAN SRA stem-loop-interacting RNA-binding protein, mitochondrial OS=Homo sapiens OX=9606 GN=SLIRP PE=1 SV=1	#CILPFDK	#CILPFDK	4	2	0.54	0.775	0.6575	0.16617	25.273
O75962	2327	TRIO	TRIO_C2327	TRIO_HUMAN Triple functional domain protein OS=Homo sapiens OX=9606 GN=TRIO PE=1 SV=2	#CGGAPSTSR	NA	2	NA	0.655	NA	0.655	NA	NA
P15121	45	AKR1B1	AKR1B1_C45	ALDR_HUMAN Aldo-keto reductase family 1 member B1 OS=Homo sapiens OX=9606 GN=AKR1B1 PE=1 SV=3	#CAHVYQNENEVGVAIQEK	#CAHVYQNENEVGVAIQEK	1	2	0.65	0.66	0.655	0.00707107	1.07955
Q01469	120	FABP5	FABP5_C120	FABP5_HUMAN Fatty acid-binding protein 5 OS=Homo sapiens OX=9606 GN=FABP5 PE=1 SV=3	#CVMNNVTCTR	#CVMNNVTCTR	6	2	0.59	0.72	0.655	0.0919239	14.0342
Q99805	250	TM9SF2	TM9SF2_C250	TM9S2_HUMAN Transmembrane 9 superfamily member 2 OS=Homo sapiens OX=9606 GN=TM9SF2 PE=1 SV=1	#CSGPPMDISNK	#CSGPPMDISNK	1	1	0.77	0.53	0.65	0.169706	26.1086
Q92896	385	GLG1	GLG1_C385	GSLG1_HUMAN Golgi apparatus protein 1 OS=Homo sapiens OX=9606 GN=GLG1 PE=1 SV=2	#CNVENLPR	#CNVENLPR	1	1	0.68	0.62	0.65	0.0424264	6.52714
O43747	160	AP1G1	AP1G1_C160	AP1G1_HUMAN AP-1 complex subunit gamma-1 OS=Homo sapiens OX=9606 GN=AP1G1 PE=1 SV=5	#CAVHVIR	NA	3	NA	0.65	NA	0.65	NA	NA
Q9Y678	691	COPG1	COPG1_C691	COPG1_HUMAN Coatomer subunit gamma-1 OS=Homo sapiens OX=9606 GN=COPG1 PE=1 SV=1	#CYVPAR	NA	1	NA	0.65	NA	0.65	NA	NA
Q9H2G2	358	SLK	SLK_C358	SLK_HUMAN STE20-like serine/threonine-protein kinase OS=Homo sapiens OX=9606 GN=SLK PE=1 SV=1	#CILESVSEK	NA	1	NA	0.65	NA	0.65	NA	NA
P20700	198	LMNB1	LMNB1_C198	LMNB1_HUMAN Lamin-B1 OS=Homo sapiens OX=9606 GN=LMNB1 PE=1 SV=2	#CQSLTEDLEFR	NA	1	NA	0.65	NA	0.65	NA	NA
Q9Y6J9	122	TAF6L	TAF6L_C122	TAF6L_HUMAN TAF6-like RNA polymerase II p300/CBP-associated factor-associated factor 65 kDa subunit 6L OS=Homo sapiens OX=9606 GN=TAF6L PE=1 SV=1	#CAETAVR	NA	2	NA	0.65	NA	0.65	NA	NA
Q8WX92	23	NELFB	NELFB_C23	NELFB_HUMAN Negative elongation factor B OS=Homo sapiens OX=9606 GN=NELFB PE=1 SV=1	#CTEPLK	NA	1	NA	0.65	NA	0.65	NA	NA
P53384	256	NUBP1	NUBP1_C256	NUBP1_HUMAN Cytosolic Fe-S cluster assembly factor NUBP1 OS=Homo sapiens OX=9606 GN=NUBP1 PE=1 SV=2	#CQDLEVPLLGR	#CQDLEVPLLGR	6	3	0.62	0.68	0.65	0.0424264	6.52714
P08754	305	GNAI3	GNAI3_C305	GNAI3_HUMAN Guanine nucleotide-binding protein G(i) subunit alpha OS=Homo sapiens OX=9606 GN=GNAI3 PE=1 SV=3	#CQFEDLNR	#CQFEDLNR	2	4	0.56	0.74	0.65	0.127279	19.5814
Q9UHR6	41	ZNHIT2	ZNHIT2_C41	ZNHI2_HUMAN Zinc finger HIT domain-containing protein 2 OS=Homo sapiens OX=9606 GN=ZNHIT2 PE=1 SV=1	NA	#CAENFYR	NA	1	NA	0.65	0.65	NA	NA
P11908	165	PRPS2	PRPS2_C165	PRPS2_HUMAN Ribose-phosphate pyrophosphokinase 2 OS=Homo sapiens OX=9606 GN=PRPS2 PE=1 SV=2	NA	#CIIVSPDAGGAK	NA	1	NA	0.65	0.65	NA	NA
P00558	50	PGK1	PGK1_C50	PGK1_HUMAN Phosphoglycerate kinase 1 OS=Homo sapiens OX=9606 GN=PGK1 PE=1 SV=3	NA	#CLDNGAK	NA	1	NA	0.65	0.65	NA	NA
Q9NSD9	76	FARSB	FARSB_C76	SYFB_HUMAN Phenylalanine--tRNA ligase beta subunit OS=Homo sapiens OX=9606 GN=FARSB PE=1 SV=3	#CLEGLVR	#CLEGLVR	2	2	0.695	0.6	0.6475	0.0671751	10.3745
P13639	290	EEF2	EEF2_C290	EF2_HUMAN Elongation factor 2 OS=Homo sapiens OX=9606 GN=EEF2 PE=1 SV=4	#CQLILDPIFK	#CQLILDPIFK	1	1	0.65	0.64	0.645	0.00707107	1.09629
O60701	414	UGDH	UGDH_C414	UGDH_HUMAN UDP-glucose 6-dehydrogenase OS=Homo sapiens OX=9606 GN=UGDH PE=1 SV=1	#CTEWDMFK	NA	2	NA	0.645	NA	0.645	NA	NA
P14866	581	HNRNPL	HNRNPL_C581	HNRPL_HUMAN Heterogeneous nuclear ribonucleoprotein L OS=Homo sapiens OX=9606 GN=HNRNPL PE=1 SV=2	#CFSTAQHAS	#CFSTAQHAS	2	2	0.705	0.58	0.6425	0.0883883	13.7569
Q96QK1	640	VPS35	VPS35_C640	VPS35_HUMAN Vacuolar protein sorting-associated protein 35 OS=Homo sapiens OX=9606 GN=VPS35 PE=1 SV=2	#CFSEENHEPLR	#CFSEENHEPLR	3	4	0.84	0.44	0.64	0.282843	44.1942
Q6P9B9	58	INTS5	INTS5_C58	INT5_HUMAN Integrator complex subunit 5 OS=Homo sapiens OX=9606 GN=INTS5 PE=1 SV=1	#CGLLLLR	NA	2	NA	0.64	NA	0.64	NA	NA
P36542	103	ATP5F1C	ATP5F1C_C103	ATPG_HUMAN ATP synthase subunit gamma, mitochondrial OS=Homo sapiens OX=9606 GN=ATP5F1C PE=1 SV=1	NA	#CGAIHSSIAK	NA	1	NA	0.64	0.64	NA	NA
P20585	142	MSH3	MSH3_C142	MSH3_HUMAN DNA mismatch repair protein Msh3 OS=Homo sapiens OX=9606 GN=MSH3 PE=1 SV=4	NA	#CDSALPQSR	NA	1	NA	0.64	0.64	NA	NA
O14950	109	MYL12B	MYL12B_C109	ML12B_HUMAN Myosin regulatory light chain 12B OS=Homo sapiens OX=9606 GN=MYL12B PE=1 SV=2	#CFDEEATGTIQEDYLR	#CFDEEATGTIQEDYLR	1	1	0.73	0.54	0.635	0.13435	21.1575
O15144	120	ARPC2	ARPC2_C120	ARPC2_HUMAN Actin-related protein 2/3 complex subunit 2 OS=Homo sapiens OX=9606 GN=ARPC2 PE=1 SV=1	#CFASVFEK	#CFASVFEK	1	1	0.64	0.63	0.635	0.00707107	1.11355
Q9UHG3	445	PCYOX1	PCYOX1_C445	PCYOX_HUMAN Prenylcysteine oxidase 1 OS=Homo sapiens OX=9606 GN=PCYOX1 PE=1 SV=3	#CPSIILHDR	#CPSIILHDR	3	2	0.59	0.68	0.635	0.0636396	10.022
Q13242	138	SRSF9	SRSF9_C138	SRSF9_HUMAN Serine/arginine-rich splicing factor 9 OS=Homo sapiens OX=9606 GN=SRSF9 PE=1 SV=1	#CYADVQK	NA	1	NA	0.63	NA	0.63	NA	NA
P53621	254	COPA	COPA_C254	COPA_HUMAN Coatomer subunit alpha OS=Homo sapiens OX=9606 GN=COPA PE=1 SV=2	#CAVFHPR	NA	1	NA	0.63	NA	0.63	NA	NA
Q8N1F7	397	NUP93	NUP93_C397	NUP93_HUMAN Nuclear pore complex protein Nup93 OS=Homo sapiens OX=9606 GN=NUP93 PE=1 SV=2	#CDVTDNQSEVADKTEDYLWLK	NA	1	NA	0.63	NA	0.63	NA	NA
Q9BQ52	374	ELAC2	ELAC2_C374	RNZ2_HUMAN Zinc phosphodiesterase ELAC protein 2 OS=Homo sapiens OX=9606 GN=ELAC2 PE=1 SV=2	#CASVHNLR	NA	2	NA	0.63	NA	0.63	NA	NA
Q9NZM1	1467	MYOF	MYOF_C1467	MYOF_HUMAN Myoferlin OS=Homo sapiens OX=9606 GN=MYOF PE=1 SV=1	#CGQYIQK	#CGQYIQK	1	2	0.63	0.63	0.63	0	0
Q12846	141	STX4	STX4_C141	STX4_HUMAN Syntaxin-4 OS=Homo sapiens OX=9606 GN=STX4 PE=1 SV=2	#CNSMQSEYR	NA	1	NA	0.63	NA	0.63	NA	NA
P52732	704	KIF11	KIF11_C704	KIF11_HUMAN Kinesin-like protein KIF11 OS=Homo sapiens OX=9606 GN=KIF11 PE=1 SV=2	NA	#CGNLTEDLK	NA	1	NA	0.63	0.63	NA	NA
P61163	34	ACTR1A	ACTR1A_C34	ACTZ_HUMAN Alpha-centractin OS=Homo sapiens OX=9606 GN=ACTR1A PE=1 SV=1	NA	#CFPNYVGR	NA	3	NA	0.63	0.63	NA	NA
Q9UBT2	185	UBA2	UBA2_C185	SAE2_HUMAN SUMO-activating enzyme subunit 2 OS=Homo sapiens OX=9606 GN=UBA2 PE=1 SV=2	NA	#CIVWAK	NA	2	NA	0.63	0.63	NA	NA
P22102	93	GART	GART_C93	PUR2_HUMAN Trifunctional purine biosynthetic protein adenosine-3 OS=Homo sapiens OX=9606 GN=GART PE=1 SV=1	NA	#CFGPTAEAAQLESSK	NA	4	NA	0.63	0.63	NA	NA
P42704	130	LRPPRC	LRPPRC_C130	LPPRC_HUMAN Leucine-rich PPR motif-containing protein, mitochondrial OS=Homo sapiens OX=9606 GN=LRPPRC PE=1 SV=3	NA	#CGSLLPELK	NA	1	NA	0.63	0.63	NA	NA
O43159	332	RRP8	RRP8_C332	RRP8_HUMAN Ribosomal RNA-processing protein 8 OS=Homo sapiens OX=9606 GN=RRP8 PE=1 SV=2	NA	#CFDLASLDPR	NA	1	NA	0.63	0.63	NA	NA
O15226	37	NKRF	NKRF_C37	NKRF_HUMAN NF-kappa-B-repressing factor OS=Homo sapiens OX=9606 GN=NKRF PE=1 SV=2	NA	#CDGQNPPKK	NA	3	NA	0.63	0.63	NA	NA
Q5T5Y3	1386	CAMSAP1	CAMSAP1_C1386	CAMP1_HUMAN Calmodulin-regulated spectrin-associated protein 1 OS=Homo sapiens OX=9606 GN=CAMSAP1 PE=1 SV=2	NA	#CSSTPDNLSR	NA	2	NA	0.63	0.63	NA	NA
P49189	355	ALDH9A1	ALDH9A1_C355	AL9A1_HUMAN 4-trimethylaminobutyraldehyde dehydrogenase OS=Homo sapiens OX=9606 GN=ALDH9A1 PE=1 SV=3	#CGGDIYVPEDPK	NA	2	NA	0.625	NA	0.625	NA	NA
P51970	66	NDUFA8	NDUFA8_C66	NDUA8_HUMAN NADH dehydrogenase [ubiquinone] 1 alpha subcomplex subunit 8 OS=Homo sapiens OX=9606 GN=NDUFA8 PE=1 SV=3	#CALDFFR	#CALDFFR	2	1	0.62	0.63	0.625	0.00707107	1.13137
Q5VW32	267	BROX	BROX_C267	BROX_HUMAN BRO1 domain-containing protein BROX OS=Homo sapiens OX=9606 GN=BROX PE=1 SV=1	#CGEAIR	#CGEAIR	3	1	0.59	0.66	0.625	0.0494975	7.9196
Q15369	11	ELOC	ELOC_C11	ELOC_HUMAN Elongin-C OS=Homo sapiens OX=9606 GN=ELOC PE=1 SV=1	#CEGPDAMYVK	#CEGPDAMYVK	3	2	0.55	0.7	0.625	0.106066	16.9706
Q7Z6M1	115	RABEPK	RABEPK_C115	RABEK_HUMAN Rab9 effector protein with kelch motifs OS=Homo sapiens OX=9606 GN=RABEPK PE=1 SV=1	#CLQVLNPETR	#CLQVLNPETR	1	1	0.49	0.76	0.625	0.190919	30.547
Q9BWD1	65	ACAT2	ACAT2_C65	THIC_HUMAN Acetyl-CoA acetyltransferase, cytosolic OS=Homo sapiens OX=9606 GN=ACAT2 PE=1 SV=2	#CGQNPVR	#CGQNPVR	2	4	0.56	0.685	0.6225	0.0883883	14.1989
O95372	171	LYPLA2	LYPLA2_C171	LYPA2_HUMAN Acyl-protein thioesterase 2 OS=Homo sapiens OX=9606 GN=LYPLA2 PE=1 SV=1	#CHGELDPMVPVR	#CHGELDPMVPVR	1	1	0.68	0.56	0.62	0.0848528	13.6859
P30520	182	ADSS	ADSS_C182	PURA2_HUMAN Adenylosuccinate synthetase isozyme 2 OS=Homo sapiens OX=9606 GN=ADSS PE=1 SV=3	#CDLVSDFDGFSER	#CDLVSDFDGFSER	1	2	0.65	0.59	0.62	0.0424264	6.84297
Q13188	102	STK3	STK3_C102	STK3_HUMAN Serine/threonine-protein kinase 3 OS=Homo sapiens OX=9606 GN=STK3 PE=1 SV=2	#CGAGSVSDIIR	#CGAGSVSDIIR	1	2	0.64	0.6	0.62	0.0282843	4.56198
P62241	100	RPS8	RPS8_C100	RS8_HUMAN 40S ribosomal protein S8 OS=Homo sapiens OX=9606 GN=RPS8 PE=1 SV=2	#CIVLIDSTPYR	#CIVLIDSTPYR	5	3	0.64	0.6	0.62	0.0282843	4.56198
P52306	350	RAP1GDS1	RAP1GDS1_C350	GDS1_HUMAN Rap1 GTPase-GDP dissociation stimulator 1 OS=Homo sapiens OX=9606 GN=RAP1GDS1 PE=1 SV=3	#CIHMVDNGIVEK	NA	1	NA	0.62	NA	0.62	NA	NA
P35637	428	FUS	FUS_C428	FUS_HUMAN RNA-binding protein FUS OS=Homo sapiens OX=9606 GN=FUS PE=1 SV=1	#CPNPTCENMNFSWR	NA	1	NA	0.62	NA	0.62	NA	NA
P50851	1921	LRBA	LRBA_C1921	LRBA_HUMAN Lipopolysaccharide-responsive and beige-like anchor protein OS=Homo sapiens OX=9606 GN=LRBA PE=1 SV=4	#CAQYSADKR	NA	1	NA	0.62	NA	0.62	NA	NA
Q9NZD8	204	SPG21	SPG21_C204	SPG21_HUMAN Maspardin OS=Homo sapiens OX=9606 GN=SPG21 PE=1 SV=1	#CQNSYVEPHK	NA	2	NA	0.62	NA	0.62	NA	NA
P27708	92	CAD	CAD_C92	PYR1_HUMAN CAD protein OS=Homo sapiens OX=9606 GN=CAD PE=1 SV=3	#CPTPSHWSATR	#CPTPSHWSATR	1	1	0.38	0.86	0.62	0.339411	54.7438
Q92621	1715	NUP205	NUP205_C1715	NU205_HUMAN Nuclear pore complex protein Nup205 OS=Homo sapiens OX=9606 GN=NUP205 PE=1 SV=3	NA	#CLGLLSR	NA	2	NA	0.62	0.62	NA	NA
Q9H0C8	190	ILKAP	ILKAP_C190	ILKAP_HUMAN Integrin-linked kinase-associated serine/threonine phosphatase 2C OS=Homo sapiens OX=9606 GN=ILKAP PE=1 SV=1	NA	#CLLDTFK	NA	2	NA	0.62	0.62	NA	NA
P50579	380	METAP2	METAP2_C380	MAP2_HUMAN Methionine aminopeptidase 2 OS=Homo sapiens OX=9606 GN=METAP2 PE=1 SV=1	NA	#CSHYMK	NA	1	NA	0.62	0.62	NA	NA
Q5T1J5	124	CHCHD2P9	CHCHD2P9_C124	CHCH9_HUMAN Putative coiled-coil-helix-coiled-coil-helix domain-containing protein CHCHD2P9, mitochondrial OS=Homo sapiens OX=9606 GN=CHCHD2P9 PE=5 SV=1	NA	#CAQNQGDIK	NA	2	NA	0.62	0.62	NA	NA
P30153	174	PPP2R1A	PPP2R1A_C174	2AAA_HUMAN Serine/threonine-protein phosphatase 2A 65 kDa regulatory subunit A alpha isoform OS=Homo sapiens OX=9606 GN=PPP2R1A PE=1 SV=4	NA	#CSDDTPMVR	NA	1	NA	0.62	0.62	NA	NA
Q01469	67	FABP5	FABP5_C67	FABP5_HUMAN Fatty acid-binding protein 5 OS=Homo sapiens OX=9606 GN=FABP5 PE=1 SV=3	NA	#CTLGEK	NA	1	NA	0.62	0.62	NA	NA
P63010	857	AP2B1	AP2B1_C857	AP2B1_HUMAN AP-2 complex subunit beta OS=Homo sapiens OX=9606 GN=AP2B1 PE=1 SV=1	#CHLNADTVSSK	#CHLNADTVSSK	2	2	0.625	0.61	0.6175	0.0106066	1.71767
Q9P2J5	936	LARS	LARS_C936	SYLC_HUMAN Leucine--tRNA ligase, cytoplasmic OS=Homo sapiens OX=9606 GN=LARS PE=1 SV=2	#CTIYVAK	#CTIYVAK	1	2	0.61	0.625	0.6175	0.0106066	1.71767
Q13263	669	TRIM28	TRIM28_C669	TIF1B_HUMAN Transcription intermediary factor 1-beta OS=Homo sapiens OX=9606 GN=TRIM28 PE=1 SV=5	#CHVLPDLKEEDGSLSLDGADST	#CHVLPDLK	1	1	0.75	0.48	0.615	0.190919	31.0437
P16615	498	ATP2A2	ATP2A2_C498	AT2A2_HUMAN Sarcoplasmic/endoplasmic reticulum calcium ATPase 2 OS=Homo sapiens OX=9606 GN=ATP2A2 PE=1 SV=1	#CTPNKPSR	#CTPNKPSR	3	4	0.66	0.56	0.61	0.0707107	11.5919
Q9GZS1	203	POLR1E	POLR1E_C203	RPA49_HUMAN DNA-directed RNA polymerase I subunit RPA49 OS=Homo sapiens OX=9606 GN=POLR1E PE=1 SV=3	#CYDDAAKPEDVYK	NA	1	NA	0.61	NA	0.61	NA	NA
Q9C0C9	353	UBE2O	UBE2O_C353	UBE2O_HUMAN (E3-independent) E2 ubiquitin-conjugating enzyme OS=Homo sapiens OX=9606 GN=UBE2O PE=1 SV=3	#CLYVFPAK	NA	1	NA	0.61	NA	0.61	NA	NA
P41252	1001	IARS	IARS_C1001	SYIC_HUMAN Isoleucine--tRNA ligase, cytoplasmic OS=Homo sapiens OX=9606 GN=IARS PE=1 SV=2	#CNLVPTDEITVYYK	NA	2	NA	0.61	NA	0.61	NA	NA
P13984	116	GTF2F2	GTF2F2_C116	T2FB_HUMAN General transcription factor IIF subunit 2 OS=Homo sapiens OX=9606 GN=GTF2F2 PE=1 SV=2	#CRPAASENYMR	NA	2	NA	0.61	NA	0.61	NA	NA
P49916	404	LIG3	LIG3_C404	DNLI3_HUMAN DNA ligase 3 OS=Homo sapiens OX=9606 GN=LIG3 PE=1 SV=2	#CTANDLK	#CTANDLK	1	1	0.29	0.93	0.61	0.452548	74.1883
Q6UB35	291	MTHFD1L	MTHFD1L_C291	C1TM_HUMAN Monofunctional C1-tetrahydrofolate synthase, mitochondrial OS=Homo sapiens OX=9606 GN=MTHFD1L PE=1 SV=1	NA	#CSHDFLSGK	NA	2	NA	0.61	0.61	NA	NA
Q8WVV9	535	HNRNPLL	HNRNPLL_C535	HNRLL_HUMAN Heterogeneous nuclear ribonucleoprotein L-like OS=Homo sapiens OX=9606 GN=HNRNPLL PE=1 SV=1	NA	#CFSTSSHL	NA	1	NA	0.61	0.61	NA	NA
P38117	42	ETFB	ETFB_C42	ETFB_HUMAN Electron transfer flavoprotein subunit beta OS=Homo sapiens OX=9606 GN=ETFB PE=1 SV=3	NA	#CEIAVEEAVR	NA	2	NA	0.61	0.61	NA	NA
Q3LXA3	155	TKFC	TKFC_C155	TKFC_HUMAN Triokinase/FMN cyclase OS=Homo sapiens OX=9606 GN=TKFC PE=1 SV=2	NA	#CGTVLIHK	NA	1	NA	0.61	0.61	NA	NA
P20810	413	CAST	CAST_C413	ICAL_HUMAN Calpastatin OS=Homo sapiens OX=9606 GN=CAST PE=1 SV=4	#CSIQSAPPEPATLK	#CSIQSAPPEPATLK	2	2	0.62	0.59	0.605	0.0212132	3.50631
Q9H4A4	69	RNPEP	RNPEP_C69	AMPB_HUMAN Aminopeptidase B OS=Homo sapiens OX=9606 GN=RNPEP PE=1 SV=2	#CLEPEGAAELR	#CLEPEGAAELR	1	1	0.61	0.6	0.605	0.00707107	1.16877
Q9C0J8	120	WDR33	WDR33_C120	WDR33_HUMAN pre-mRNA 3' end processing protein WDR33 OS=Homo sapiens OX=9606 GN=WDR33 PE=1 SV=2	#CPVFVVR	#CPVFVVR	1	2	0.45	0.76	0.605	0.219203	36.2319
O00232	255	PSMD12	PSMD12_C255	PSD12_HUMAN 26S proteasome non-ATPase regulatory subunit 12 OS=Homo sapiens OX=9606 GN=PSMD12 PE=1 SV=3	#CIQAESEK	#CIQAESEK	1	1	0.56	0.64	0.6	0.0565685	9.42809
O60218	45	AKR1B10	AKR1B10_C45	AK1BA_HUMAN Aldo-keto reductase family 1 member B10 OS=Homo sapiens OX=9606 GN=AKR1B10 PE=1 SV=2	#CAYVYQNEHEVGEAIQEK	#CAYVYQNEHEVGEAIQEK	1	2	0.63	0.57	0.6	0.0424264	7.07107
Q12769	629	NUP160	NUP160_C629	NU160_HUMAN Nuclear pore complex protein Nup160 OS=Homo sapiens OX=9606 GN=NUP160 PE=1 SV=3	#CYNLQSPEK	NA	1	NA	0.6	NA	0.6	NA	NA
Q15269	60	PWP2	PWP2_C60	PWP2_HUMAN Periodic tryptophan protein 2 homolog OS=Homo sapiens OX=9606 GN=PWP2 PE=2 SV=2	#CVGLSPDGR	NA	1	NA	0.6	NA	0.6	NA	NA
Q99615	105	DNAJC7	DNAJC7_C105	DNJC7_HUMAN DnaJ homolog subfamily C member 7 OS=Homo sapiens OX=9606 GN=DNAJC7 PE=1 SV=2	#CHLSLGNAM #CHLSLGNA	NA	4	NA	0.6	NA	0.6	NA	NA
O95299	253	NDUFA10	NDUFA10_C253	NDUAA_HUMAN NADH dehydrogenase [ubiquinone] 1 alpha subcomplex subunit 10, mitochondrial OS=Homo sapiens OX=9606 GN=NDUFA10 PE=1 SV=1	#CEVLQYSAR	NA	4	NA	0.6	NA	0.6	NA	NA
P42025	34	ACTR1B	ACTR1B_C34	ACTY_HUMAN Beta-centractin OS=Homo sapiens OX=9606 GN=ACTR1B PE=1 SV=1	#CFPNYVGR	NA	2	NA	0.6	NA	0.6	NA	NA
P60842	131	EIF4A1	EIF4A1_C131	IF4A1_HUMAN Eukaryotic initiation factor 4A-I OS=Homo sapiens OX=9606 GN=EIF4A1 PE=1 SV=1	#CHACIGGTNVR	NA	1	NA	0.6	NA	0.6	NA	NA
O95816	142	BAG2	BAG2_C142	BAG2_HUMAN BAG family molecular chaperone regulator 2 OS=Homo sapiens OX=9606 GN=BAG2 PE=1 SV=1	#CSSEVPHGPVDQK	NA	2	NA	0.6	NA	0.6	NA	NA
Q9NQT8	26	KIF13B	KIF13B_C26	KI13B_HUMAN Kinesin-like protein KIF13B OS=Homo sapiens OX=9606 GN=KIF13B PE=1 SV=2	NA	#CVVDVDANK	NA	1	NA	0.6	0.6	NA	NA
Q7L2E3	484	DHX30	DHX30_C484	DHX30_HUMAN ATP-dependent RNA helicase DHX30 OS=Homo sapiens OX=9606 GN=DHX30 PE=1 SV=1	NA	#CNVIITQPR	NA	2	NA	0.6	0.6	NA	NA
O75607	79	NPM3	NPM3_C79	NPM3_HUMAN Nucleoplasmin-3 OS=Homo sapiens OX=9606 GN=NPM3 PE=1 SV=3	NA	#CNVVEVVAR	NA	1	NA	0.6	0.6	NA	NA
Q92499	668	DDX1	DDX1_C668	DDX1_HUMAN ATP-dependent RNA helicase DDX1 OS=Homo sapiens OX=9606 GN=DDX1 PE=1 SV=2	NA	#CTISQVEPDIK	NA	3	NA	0.6	0.6	NA	NA
Q02218	63	OGDH	OGDH_C63	ODO1_HUMAN 2-oxoglutarate dehydrogenase, mitochondrial OS=Homo sapiens OX=9606 GN=OGDH PE=1 SV=3	NA	#CAWLENPK	NA	1	NA	0.6	0.6	NA	NA
Q04206	109	RELA	RELA_C109	TF65_HUMAN Transcription factor p65 OS=Homo sapiens OX=9606 GN=RELA PE=1 SV=2	NA	#CIHSFQNLGIQ	NA	1	NA	0.6	0.6	NA	NA
Q9BXB5	33	OSBPL10	OSBPL10_C33	OSB10_HUMAN Oxysterol-binding protein-related protein 10 OS=Homo sapiens OX=9606 GN=OSBPL10 PE=1 SV=2	NA	#CSLAGR	NA	1	NA	0.6	0.6	NA	NA
P21291	122	CSRP1	CSRP1_C122	CSRP1_HUMAN Cysteine and glycine-rich protein 1 OS=Homo sapiens OX=9606 GN=CSRP1 PE=1 SV=3	NA	#CSQAVYAAEK	NA	2	NA	0.6	0.6	NA	NA
O00429	431	DNM1L	DNM1L_C431	DNM1L_HUMAN Dynamin-1-like protein OS=Homo sapiens OX=9606 GN=DNM1L PE=1 SV=2	#CVELVHEEMQR	#CVELVHEEMQR	3	4	0.61	0.585	0.5975	0.0176777	2.95861
P46459	599	NSF	NSF_C599	NSF_HUMAN Vesicle-fusing ATPase OS=Homo sapiens OX=9606 GN=NSF PE=1 SV=3	#CVVVDDIER	#CVVVDDIER	1	1	0.69	0.5	0.595	0.13435	22.5799
P36776	909	LONP1	LONP1_C909	LONM_HUMAN Lon protease homolog, mitochondrial OS=Homo sapiens OX=9606 GN=LONP1 PE=1 SV=2	#CIVLPAENK	#CIVLPAENK	1	1	0.62	0.57	0.595	0.0353553	5.94207
Q9Y6K5	825	OAS3	OAS3_C825	OAS3_HUMAN 2'-5'-oligoadenylate synthase 3 OS=Homo sapiens OX=9606 GN=OAS3 PE=1 SV=3	#CFSQFTEQGNK	#CFSQFTEQGNK	2	1	0.57	0.62	0.595	0.0353553	5.94207
P53621	655	COPA	COPA_C655	COPA_HUMAN Coatomer subunit alpha OS=Homo sapiens OX=9606 GN=COPA PE=1 SV=2	#CGNIEIALEAAK	#CGNIEIALEAAK	1	2	0.57	0.62	0.595	0.0353553	5.94207
Q99460	104	PSMD1	PSMD1_C104	PSMD1_HUMAN 26S proteasome non-ATPase regulatory subunit 1 OS=Homo sapiens OX=9606 GN=PSMD1 PE=1 SV=2	#CIDHYTK	#CIDHYTK	1	1	0.54	0.65	0.595	0.0777817	13.0726
P09382	43	LGALS1	LGALS1_C43	LEG1_HUMAN Galectin-1 OS=Homo sapiens OX=9606 GN=LGALS1 PE=1 SV=2	#CLHFNPR	#CLHFNPR	3	1	0.53	0.66	0.595	0.0919239	15.4494
O94925	525	GLS	GLS_C525	GLSK_HUMAN Glutaminase kidney isoform, mitochondrial OS=Homo sapiens OX=9606 GN=GLS PE=1 SV=1	#CNFHNYDNLR	#CNFHNYDNLR	1	1	0.53	0.66	0.595	0.0919239	15.4494
Q8N1G4	390	LRRC47	LRRC47_C390	LRC47_HUMAN Leucine-rich repeat-containing protein 47 OS=Homo sapiens OX=9606 GN=LRRC47 PE=1 SV=1	#CARPPQDLK	#CARPPQDLK	3	3	0.52	0.67	0.595	0.106066	17.8262
O43684	129	BUB3	BUB3_C129	BUB3_HUMAN Mitotic checkpoint protein BUB3 OS=Homo sapiens OX=9606 GN=BUB3 PE=1 SV=1	#CNAGTFSQPEK	#CNAGTFSQPEK	2	2	0.505	0.68	0.5925	0.123744	20.885
Q9BXJ9	322	NAA15	NAA15_C322	NAA15_HUMAN N-alpha-acetyltransferase 15, NatA auxiliary subunit OS=Homo sapiens OX=9606 GN=NAA15 PE=1 SV=1	#CPPVFNTLR	#CPPVFNTLR	4	3	0.65	0.53	0.59	0.0848528	14.3818
P35250	270	RFC2	RFC2_C270	RFC2_HUMAN Replication factor C subunit 2 OS=Homo sapiens OX=9606 GN=RFC2 PE=1 SV=3	#CVNANIDEAYK	NA	1	NA	0.59	NA	0.59	NA	NA
P35249	281	RFC4	RFC4_C281	RFC4_HUMAN Replication factor C subunit 4 OS=Homo sapiens OX=9606 GN=RFC4 PE=1 SV=2	#CQSGSFDK	NA	2	NA	0.59	NA	0.59	NA	NA
O14579	34	COPE	COPE_C34	COPE_HUMAN Coatomer subunit epsilon OS=Homo sapiens OX=9606 GN=COPE PE=1 SV=3	#CINEAQR	NA	1	NA	0.59	NA	0.59	NA	NA
P08708	35	RPS17	RPS17_C35	RS17_HUMAN 40S ribosomal protein S17 OS=Homo sapiens OX=9606 GN=RPS17 PE=1 SV=2	#CEEIAIIPSK	#CEEIAIIPSK	4	2	0.43	0.75	0.59	0.226274	38.3516
Q12982	229	BNIP2	BNIP2_C229	BNIP2_HUMAN BCL2/adenovirus E1B 19 kDa protein-interacting protein 2 OS=Homo sapiens OX=9606 GN=BNIP2 PE=1 SV=1	NA	#CYQQIDR	NA	1	NA	0.59	0.59	NA	NA
Q9HC35	314	EML4	EML4_C314	EMAL4_HUMAN Echinoderm microtubule-associated protein-like 4 OS=Homo sapiens OX=9606 GN=EML4 PE=1 SV=3	NA	#CLAIHPDK	NA	2	NA	0.59	0.59	NA	NA
P18669	153	PGAM1	PGAM1_C153	PGAM1_HUMAN Phosphoglycerate mutase 1 OS=Homo sapiens OX=9606 GN=PGAM1 PE=1 SV=2	NA	#CESLKDTIAR	NA	1	NA	0.59	0.59	NA	NA
P33121	297	ACSL1	ACSL1_C297	ACSL1_HUMAN Long-chain-fatty-acid--CoA ligase 1 OS=Homo sapiens OX=9606 GN=ACSL1 PE=1 SV=1	NA	#CSAFVK	NA	1	NA	0.59	0.59	NA	NA
P68104	234	EEF1A1	EEF1A1_C234	EF1A1_HUMAN Elongation factor 1-alpha 1 OS=Homo sapiens OX=9606 GN=EEF1A1 PE=1 SV=1	NA	#CILPPTRPTDK	NA	2	NA	0.59	0.59	NA	NA
Q15149	4454	PLEC	PLEC_C4454	PLEC_HUMAN Plectin OS=Homo sapiens OX=9606 GN=PLEC PE=1 SV=3	NA	#CTGGIIDPSTGER	NA	4	NA	0.59	0.59	NA	NA
Q9NV35	28	NUDT15	NUDT15_C28	NUD15_HUMAN Nucleotide triphosphate diphosphatase NUDT15 OS=Homo sapiens OX=9606 GN=NUDT15 PE=1 SV=1	NA	#CVLLGK	NA	1	NA	0.59	0.59	NA	NA
Q9NZ32	37	ACTR10	ACTR10_C37	ARP10_HUMAN Actin-related protein 10 OS=Homo sapiens OX=9606 GN=ACTR10 PE=1 SV=1	NA	#CIIPSVIK	NA	3	NA	0.59	0.59	NA	NA
Q2M389	936	WASHC4	WASHC4_C936	WASC4_HUMAN WASH complex subunit 4 OS=Homo sapiens OX=9606 GN=WASHC4 PE=1 SV=2	NA	#CSSNAIR	NA	1	NA	0.59	0.59	NA	NA
Q9Y3A5	119	SBDS	SBDS_C119	SBDS_HUMAN Ribosome maturation protein SBDS OS=Homo sapiens OX=9606 GN=SBDS PE=1 SV=4	NA	#CVNPETK	NA	1	NA	0.59	0.59	NA	NA
P21980	554	TGM2	TGM2_C554	TGM2_HUMAN Protein-glutamine gamma-glutamyltransferase 2 OS=Homo sapiens OX=9606 GN=TGM2 PE=1 SV=2	#CLTESNLIK	#CLTESNLIK	2	2	0.47	0.705	0.5875	0.16617	28.2843
Q9BQ52	609	ELAC2	ELAC2_C609	RNZ2_HUMAN Zinc phosphodiesterase ELAC protein 2 OS=Homo sapiens OX=9606 GN=ELAC2 PE=1 SV=2	#CLQEGAEISSPAVER	#CLQEGAEISSPAVER	3	1	0.57	0.6	0.585	0.0212132	3.62619
Q5JRX3	313	PITRM1	PITRM1_C313	PREP_HUMAN Presequence protease, mitochondrial OS=Homo sapiens OX=9606 GN=PITRM1 PE=1 SV=3	#CGPDSFATDPSK	#CGPDSFATDPSK	2	4	0.56	0.61	0.585	0.0353553	6.04365
P25398	56	RPS12	RPS12_C56	RS12_HUMAN 40S ribosomal protein S12 OS=Homo sapiens OX=9606 GN=RPS12 PE=1 SV=3	#CDEPMYVK	#CDEPMYVK	7	5	0.59	0.57	0.58	0.0141421	2.4383
Q9Y223	520	GNE	GNE_C520	GLCNE_HUMAN Bifunctional UDP-N-acetylglucosamine 2-epimerase/N-acetylmannosamine kinase OS=Homo sapiens OX=9606 GN=GNE PE=1 SV=1	#CAAIAER	NA	1	NA	0.58	NA	0.58	NA	NA
Q13813	1930	SPTAN1	SPTAN1_C1930	SPTN1_HUMAN Spectrin alpha chain, non-erythrocytic 1 OS=Homo sapiens OX=9606 GN=SPTAN1 PE=1 SV=3	#CTNGQDLIK	NA	1	NA	0.58	NA	0.58	NA	NA
P61421	129	ATP6V0D1	ATP6V0D1_C129	VA0D1_HUMAN V-type proton ATPase subunit d 1 OS=Homo sapiens OX=9606 GN=ATP6V0D1 PE=1 SV=1	#CHPLGSFEQM	NA	2	NA	0.58	NA	0.58	NA	NA
P27708	2016	CAD	CAD_C2016	PYR1_HUMAN CAD protein OS=Homo sapiens OX=9606 GN=CAD PE=1 SV=3	#CYADVVVLR	NA	1	NA	0.58	NA	0.58	NA	NA
Q14680	598	MELK	MELK_C598	MELK_HUMAN Maternal embryonic leucine zipper kinase OS=Homo sapiens OX=9606 GN=MELK PE=1 SV=3	#CQTQSDFGK	NA	1	NA	0.58	NA	0.58	NA	NA
P11413	158	G6PD	G6PD_C158	G6PD_HUMAN Glucose-6-phosphate 1-dehydrogenase OS=Homo sapiens OX=9606 GN=G6PD PE=1 SV=4	#CMSQIGWNR	#CMSQIGWNR	2	1	0.57	0.59	0.58	0.0141421	2.4383
Q9BTU6	124	PI4K2A	PI4K2A_C124	P4K2A_HUMAN Phosphatidylinositol 4-kinase type 2-alpha OS=Homo sapiens OX=9606 GN=PI4K2A PE=1 SV=1	NA	#CIFPER	NA	2	NA	0.58	0.58	NA	NA
Q8N3C0	131	ASCC3	ASCC3_C131	ASCC3_HUMAN Activating signal cointegrator 1 complex subunit 3 OS=Homo sapiens OX=9606 GN=ASCC3 PE=1 SV=3	NA	#CNATNR	NA	1	NA	0.58	0.58	NA	NA
P12268	173	IMPDH2	IMPDH2_C173	IMDH2_HUMAN Inosine-5'-monophosphate dehydrogenase 2 OS=Homo sapiens OX=9606 GN=IMPDH2 PE=1 SV=2	#CFLEEIMTK	#CFLEEIMTK	1	2	0.72	0.43	0.575	0.205061	35.6628
P51858	12	HDGF	HDGF_C12	HDGF_HUMAN Hepatoma-derived growth factor OS=Homo sapiens OX=9606 GN=HDGF PE=1 SV=1	#CGDLVFAK	#CGDLVFAK	3	2	0.7	0.45	0.575	0.176777	30.7438
P42704	208	LRPPRC	LRPPRC_C208	LPPRC_HUMAN Leucine-rich PPR motif-containing protein, mitochondrial OS=Homo sapiens OX=9606 GN=LRPPRC PE=1 SV=3	#CNVGDIEGASK	#CNVGDIEGASK	1	1	0.58	0.56	0.57	0.0141421	2.48108
P49588	903	AARS	AARS_C903	SYAC_HUMAN Alanine--tRNA ligase, cytoplasmic OS=Homo sapiens OX=9606 GN=AARS PE=1 SV=2	#CQVPQNAANR	#CQVPQNAANR	2	2	0.51	0.63	0.57	0.0848528	14.8865
P49411	290	TUFM	TUFM_C290	EFTU_HUMAN Elongation factor Tu, mitochondrial OS=Homo sapiens OX=9606 GN=TUFM PE=1 SV=2	#CELLGHSK	#CELLGH #CELLGHSK	1	3	0.49	0.65	0.57	0.113137	19.8486
P27348	94	YWHAQ	YWHAQ_C94	1433T_HUMAN 14-3-3 protein theta OS=Homo sapiens OX=9606 GN=YWHAQ PE=1 SV=1	#CTTVLELLDK	#CTTVLELLDK	3	3	0.47	0.67	0.57	0.141421	24.8108
P78527	1954	PRKDC	PRKDC_C1954	PRKDC_HUMAN DNA-dependent protein kinase catalytic subunit OS=Homo sapiens OX=9606 GN=PRKDC PE=1 SV=3	#CVFNELK	NA	1	NA	0.57	NA	0.57	NA	NA
P12814	480	ACTN1	ACTN1_C480	ACTN1_HUMAN Alpha-actinin-1 OS=Homo sapiens OX=9606 GN=ACTN1 PE=1 SV=2	#CDQWDNLGALTQK	NA	2	NA	0.57	NA	0.57	NA	NA
Q15149	3017	PLEC	PLEC_C3017	PLEC_HUMAN Plectin OS=Homo sapiens OX=9606 GN=PLEC PE=1 SV=3	#CLLPLTDK	NA	3	NA	0.57	NA	0.57	NA	NA
P23434	138	GCSH	GCSH_C138	GCSH_HUMAN Glycine cleavage system H protein, mitochondrial OS=Homo sapiens OX=9606 GN=GCSH PE=1 SV=2	#CYEDGWLIK	NA	1	NA	0.57	NA	0.57	NA	NA
Q5VZ89	126	DENND4C	DENND4C_C126	DEN4C_HUMAN DENN domain-containing protein 4C OS=Homo sapiens OX=9606 GN=DENND4C PE=1 SV=3	#CANVNNSSTTSQR	NA	3	NA	0.57	NA	0.57	NA	NA
P26374	582	CHML	CHML_C582	RAE2_HUMAN Rab proteins geranylgeranyltransferase component A 2 OS=Homo sapiens OX=9606 GN=CHML PE=1 SV=2	#CGLGNEHAVK	NA	1	NA	0.57	NA	0.57	NA	NA
Q9Y2D4	32	EXOC6B	EXOC6B_C32	EXC6B_HUMAN Exocyst complex component 6B OS=Homo sapiens OX=9606 GN=EXOC6B PE=1 SV=3	NA	#CIGPTLR	NA	1	NA	0.57	0.57	NA	NA
O00154	288	ACOT7	ACOT7_C288	BACH_HUMAN Cytosolic acyl coenzyme A thioester hydrolase OS=Homo sapiens OX=9606 GN=ACOT7 PE=1 SV=3	NA	#CVITISGR	NA	1	NA	0.57	0.57	NA	NA
O75382	252	TRIM3	TRIM3_C252	TRIM3_HUMAN Tripartite motif-containing protein 3 OS=Homo sapiens OX=9606 GN=TRIM3 PE=1 SV=2	NA	#CSFAEQALR	NA	1	NA	0.57	0.57	NA	NA
Q12996	103	CSTF3	CSTF3_C103	CSTF3_HUMAN Cleavage stimulation factor subunit 3 OS=Homo sapiens OX=9606 GN=CSTF3 PE=1 SV=1	NA	#CYLSYVR	NA	1	NA	0.57	0.57	NA	NA
P52788	237	SMS	SMS_C237	SPSY_HUMAN Spermine synthase OS=Homo sapiens OX=9606 GN=SMS PE=1 SV=2	NA	#CGDVLDNLK	NA	1	NA	0.57	0.57	NA	NA
Q02880	237	TOP2B	TOP2B_C237	TOP2B_HUMAN DNA topoisomerase 2-beta OS=Homo sapiens OX=9606 GN=TOP2B PE=1 SV=3	NA	#CITFQPDLSK	NA	1	NA	0.57	0.57	NA	NA
Q16181	280	SEPTIN7	SEPTIN7_C280	SEPT7_HUMAN Septin-7 OS=Homo sapiens OX=9606 GN=SEPTIN7 PE=1 SV=2	NA	#CDFTILR	NA	2	NA	0.57	0.57	NA	NA
Q9Y2U8	547	LEMD3	LEMD3_C547	MAN1_HUMAN Inner nuclear membrane protein Man1 OS=Homo sapiens OX=9606 GN=LEMD3 PE=1 SV=2	NA	#CGSSSQR	NA	1	NA	0.57	0.57	NA	NA
O95352	406	ATG7	ATG7_C406	ATG7_HUMAN Ubiquitin-like modifier-activating enzyme ATG7 OS=Homo sapiens OX=9606 GN=ATG7 PE=1 SV=1	NA	#CLGGGKPK	NA	1	NA	0.57	0.57	NA	NA
[truncated: 496 more rows]
