# Supplementary material for: Proteolysis-assisted cyclization facilitates site-centric target deconvolution of isothiocyanates
Source: Research Square preprint supplement (doi:10.21203/rs.3.rs-5055115/v1), 2025-10-08
Supplement: Supplementary file 6 [file bbfd7d7fcf33de04ffb7f773.xlsx]

## Sheet: Legend
Supplementary Data 7. Mapping in situ SFNyne-adducted sites in the HEK293T proteome. HEK293T cells treated with 100 μM SFNyne for 4h were harvested, lysed and digested with ProK. The resulting probe-labeled peptides were conjugated with Az-UV-biotin via CuAAC. The biotinylated peptides were captured with streptavidin and photoreleased for LC-MS/MS-based proteomics.

## Sheet: Data S5
Uniprot Accession #	Site#	Genename	GN_Site	Modified Sequences	Spectrum Count	Description	Identification score for all PSMs	Median Identification Score
P49588	773	AARS	AARS_C773	#CLSVMEAK	7	SYAC_HUMAN Alanine--tRNA ligase, cytoplasmic OS=Homo sapiens OX=9606 GN=AARS PE=1 SV=2	0.0290471 0.0325417 0.0434484 0.0607685 0.0740884 0.21283 0.223553	0.0607685
Q9NRN7	296	AASDHPPT	AASDHPPT_C296	#CFTEEIPIR	2	ADPPT_HUMAN L-aminoadipate-semialdehyde dehydrogenase-phosphopantetheinyl transferase OS=Homo sapiens OX=9606 GN=AASDHPPT PE=1 SV=2	0.164085 0.198754	0.18142
Q9BWD1	158	ACAT2	ACAT2_C158	#CHMGITAENVAK	1	THIC_HUMAN Acetyl-CoA acetyltransferase, cytosolic OS=Homo sapiens OX=9606 GN=ACAT2 PE=1 SV=2	0.0576427	0.0576427
Q9UKV3	1083	ACIN1	ACIN1_C1083	#CADYAEQDELDYHR	2	ACINU_HUMAN Apoptotic chromatin condensation inducer in the nucleus OS=Homo sapiens OX=9606 GN=ACIN1 PE=1 SV=2	0.015908 0.0490636	0.0324858
P55265	392	ADAR	ADAR_C392	#CNIPTSNASNNMVTTEK	1	DSRAD_HUMAN Double-stranded RNA-specific adenosine deaminase OS=Homo sapiens OX=9606 GN=ADAR PE=1 SV=4	0.00121137	0.00121137
P49189	355	ALDH9A1	ALDH9A1_C355	#CGGDIYVPEDPK	1	AL9A1_HUMAN 4-trimethylaminobutyraldehyde dehydrogenase OS=Homo sapiens OX=9606 GN=ALDH9A1 PE=1 SV=3	0.144456	0.144456
Q6P6C2	378	ALKBH5	ALKBH5_C378	#CSEAAGSPARK	1	ALKB5_HUMAN RNA demethylase ALKBH5 OS=Homo sapiens OX=9606 GN=ALKBH5 PE=1 SV=2	0.104134	0.104134
Q4VCS5	647	AMOT	AMOT_C647	#CQPTNVSEYNAA	3	AMOT_HUMAN Angiomotin OS=Homo sapiens OX=9606 GN=AMOT PE=1 SV=1	0.0476999 0.121942 0.128657	0.121942
Q4VCS5	1047	AMOT	AMOT_C1047	#CNPDKTDGPVFHSN	1	AMOT_HUMAN Angiomotin OS=Homo sapiens OX=9606 GN=AMOT PE=1 SV=1	0.0762468	0.0762468
Q4VCS5	862	AMOT	AMOT_C862	#CSTQTERGTESNK	2	AMOT_HUMAN Angiomotin OS=Homo sapiens OX=9606 GN=AMOT PE=1 SV=1	0.0961921 0.224939	0.160566
Q4VCS5	741	AMOT	AMOT_C741	#CLDMEGRIK #CLDMEGR	3	AMOT_HUMAN Angiomotin OS=Homo sapiens OX=9606 GN=AMOT PE=1 SV=1	0.118555 0.125334 0.19716	0.125334
Q7Z6K5	183	ARPIN	ARPIN_C183	#CNFTGDGK	1	ARPIN_HUMAN Arpin OS=Homo sapiens OX=9606 GN=ARPIN PE=1 SV=1	0.28286	0.28286
P05023	459	ATP1A1	ATP1A1_C459	#CIELCCGSVK	1	AT1A1_HUMAN Sodium/potassium-transporting ATPase subunit alpha-1 OS=Homo sapiens OX=9606 GN=ATP1A1 PE=1 SV=1	0.205216	0.205216
P05023	518	ATP1A1	ATP1A1_C518	#CSSILLHGK	1	AT1A1_HUMAN Sodium/potassium-transporting ATPase subunit alpha-1 OS=Homo sapiens OX=9606 GN=ATP1A1 PE=1 SV=1	0.223314	0.223314
Q5TC12	321	ATPAF1	ATPAF1_C321	#CAQNQNK #CAQNQNKT	2	ATPF1_HUMAN ATP synthase mitochondrial F1 complex assembly factor 1 OS=Homo sapiens OX=9606 GN=ATPAF1 PE=1 SV=1	0.164632 0.260884	0.212758
O15382	342	BCAT2	BCAT2_C342	#CQVCPVHR	5	BCAT2_HUMAN Branched-chain-amino-acid aminotransferase, mitochondrial OS=Homo sapiens OX=9606 GN=BCAT2 PE=1 SV=2	0.170702 0.183294 0.18571 0.213127 0.257111	0.18571
Q9NYF8	242	BCLAF1	BCLAF1_C242	#CSDAPMLSTVHSAK	1	BCLF1_HUMAN Bcl-2-associated transcription factor 1 OS=Homo sapiens OX=9606 GN=BCLAF1 PE=1 SV=2	0.0299427	0.0299427
Q8NFC6	2570	BOD1L1	BOD1L1_C2570	#CITGQESK	2	BD1L1_HUMAN Biorientation of chromosomes in cell division protein 1-like 1 OS=Homo sapiens OX=9606 GN=BOD1L1 PE=1 SV=2	0.282855 0.346498	0.314677
O14981	1542	BTAF1	BTAF1_C1542	#CDVDETVSSATLSEETEKPK	3	BTAF1_HUMAN TATA-binding protein-associated factor 172 OS=Homo sapiens OX=9606 GN=BTAF1 PE=1 SV=2	0.00489171 0.0124915 0.120928	0.0124915
P27824	194	CANX	CANX_C194	#CGEDYK	1	CALX_HUMAN Calnexin OS=Homo sapiens OX=9606 GN=CANX PE=1 SV=2	0.292516	0.292516
Q01518	93	CAP1	CAP1_C93	#CQQPAENK	2	CAP1_HUMAN Adenylyl cyclase-associated protein 1 OS=Homo sapiens OX=9606 GN=CAP1 PE=1 SV=5	0.0540802 0.112468	0.0832741
P20810	328	CAST	CAST_C328	#CGEDDETIPSEYRLK #CGEDDETIPSEYRLKPATDK	3	ICAL_HUMAN Calpastatin OS=Homo sapiens OX=9606 GN=CAST PE=1 SV=4	0.0107946 0.0240948 0.0986816	0.0240948
P35520	109	CBS	CBS_C109	#CEFFNAGGSVK	1	CBS_HUMAN Cystathionine beta-synthase OS=Homo sapiens OX=9606 GN=CBS PE=1 SV=2	0.327763	0.327763
Q16204	27	CCDC6	CCDC6_C27	#CSSTSGGGGGGGGGGGGGK	3	CCDC6_HUMAN Coiled-coil domain-containing protein 6 OS=Homo sapiens OX=9606 GN=CCDC6 PE=1 SV=2	0.00026283 0.053827 0.26619	0.053827
Q9H6F5	127	CCDC86	CCDC86_C127	#CSQDQGVLASELAQNK	5	CCD86_HUMAN Coiled-coil domain-containing protein 86 OS=Homo sapiens OX=9606 GN=CCDC86 PE=1 SV=1	0.0016381 0.00488908 0.0110211 0.0182051 0.0458713	0.0110211
Q99832	345	CCT7	CCT7_C345	#CQVFEETQIGGER	1	TCPH_HUMAN T-complex protein 1 subunit eta OS=Homo sapiens OX=9606 GN=CCT7 PE=1 SV=2	0.100014	0.100014
Q99832	158	CCT7	CCT7_C158	#CAMTALSSK	2	TCPH_HUMAN T-complex protein 1 subunit eta OS=Homo sapiens OX=9606 GN=CCT7 PE=1 SV=2	0.0477941 0.143495	0.0956445
P60953	6	CDC42	CDC42_C6	#CVVVGDGAVGK	8	CDC42_HUMAN Cell division control protein 42 homolog OS=Homo sapiens OX=9606 GN=CDC42 PE=1 SV=2	0.00843195 0.00942631 0.0147614 0.0160103 0.0769179 0.0859712 0.173727 0.29738	0.0464641
Q00534	15	CDK6	CDK6_C15	#CVAEIGEGAYGK	2	CDK6_HUMAN Cyclin-dependent kinase 6 OS=Homo sapiens OX=9606 GN=CDK6 PE=1 SV=1	0.00622331 0.0326341	0.0194287
P23528	147	CFL1	CFL1_C147	#CTLAEK	4	COF1_HUMAN Cofilin-1 OS=Homo sapiens OX=9606 GN=CFL1 PE=1 SV=3	0.138023 0.238827 0.26235 0.299386	0.250588
P23528	39	CFL1	CFL1_C39	#CLSEDKK	3	COF1_HUMAN Cofilin-1 OS=Homo sapiens OX=9606 GN=CFL1 PE=1 SV=3	0.272633 0.304394 0.30587	0.304394
Q14839	1594	CHD4	CHD4_C1594	#CTQAPAPASEDEK	7	CHD4_HUMAN Chromodomain-helicase-DNA-binding protein 4 OS=Homo sapiens OX=9606 GN=CHD4 PE=1 SV=2	0.0196366 0.0338575 0.0428395 0.0884999 0.120201 0.230509 0.244477	0.0884999
Q8TCG1	337	CIP2A	CIP2A_C337	#CLEPTVALLR	1	CIP2A_HUMAN Protein CIP2A OS=Homo sapiens OX=9606 GN=CIP2A PE=1 SV=2	0.235099	0.235099
Q14008	1500	CKAP5	CKAP5_C1500	#CEMPELVQHK	1	CKAP5_HUMAN Cytoskeleton-associated protein 5 OS=Homo sapiens OX=9606 GN=CKAP5 PE=1 SV=3	0.0634168	0.0634168
Q14008	1946	CKAP5	CKAP5_C1946	#CGLDNTK	1	CKAP5_HUMAN Cytoskeleton-associated protein 5 OS=Homo sapiens OX=9606 GN=CKAP5 PE=1 SV=3	0.298785	0.298785
P12277	74	CKB	CKB_C74	#CVAGDEESYEVFK	1	KCRB_HUMAN Creatine kinase B-type OS=Homo sapiens OX=9606 GN=CKB PE=1 SV=1	0.0157907	0.0157907
Q00610	870	CLTC	CLTC_C870	#CEEPATHNALAK	6	CLH1_HUMAN Clathrin heavy chain 1 OS=Homo sapiens OX=9606 GN=CLTC PE=1 SV=5	0.0102372 0.0325612 0.0399691 0.0710969 0.122873 0.255367	0.055533
Q00610	1102	CLTC	CLTC_C1102	#CNEPAVWSQLAK	1	CLH1_HUMAN Clathrin heavy chain 1 OS=Homo sapiens OX=9606 GN=CLTC PE=1 SV=5	0.106292	0.106292
O75153	732	CLUH	CLUH_C732	#CQDEVRDQK	1	CLU_HUMAN Clustered mitochondria protein homolog OS=Homo sapiens OX=9606 GN=CLUH PE=1 SV=2	0.161793	0.161793
P62633	140	CNBP	CNBP_C140	#CGETGHVAINCSK	2	CNBP_HUMAN Cellular nucleic acid-binding protein OS=Homo sapiens OX=9606 GN=CNBP PE=1 SV=1	0.125033 0.223523	0.174278
P62633	119	CNBP	CNBP_C119	#CYSCGEFGHIQK	1	CNBP_HUMAN Cellular nucleic acid-binding protein OS=Homo sapiens OX=9606 GN=CNBP PE=1 SV=1	0.339303	0.339303
Q99439	215	CNN2	CNN2_C215	#CASQVGMTAPGTR	1	CNN2_HUMAN Calponin-2 OS=Homo sapiens OX=9606 GN=CNN2 PE=1 SV=4	0.0118381	0.0118381
Q15417	173	CNN3	CNN3_C173	#CASQAGMTAYGTR	1	CNN3_HUMAN Calponin-3 OS=Homo sapiens OX=9606 GN=CNN3 PE=1 SV=1	0.021739	0.021739
Q9UNS2	383	COPS3	COPS3_C383	#CIELDERLK	2	CSN3_HUMAN COP9 signalosome complex subunit 3 OS=Homo sapiens OX=9606 GN=COPS3 PE=1 SV=3	0.19259 0.198331	0.195461
Q9ULV4	420	CORO1C	CORO1C_C420	#CDLISIPK	3	COR1C_HUMAN Coronin-1C OS=Homo sapiens OX=9606 GN=CORO1C PE=1 SV=1	0.162022 0.183081 0.322498	0.183081
O75534	186	CSDE1	CSDE1_C186	#CQGVVCAMK	2	CSDE1_HUMAN Cold shock domain-containing protein E1 OS=Homo sapiens OX=9606 GN=CSDE1 PE=1 SV=2	0.0281479 0.0786668	0.0534073
P04080	3	CSTB	CSTB_C3	#CGAPSATQPATAETQHIADQVR	1	CYTB_HUMAN Cystatin-B OS=Homo sapiens OX=9606 GN=CSTB PE=1 SV=2	0.000170274	0.000170274
P17812	491	CTPS1	CTPS1_C491	#CLEEQGLK	5	PYRG1_HUMAN CTP synthase 1 OS=Homo sapiens OX=9606 GN=CTPS1 PE=1 SV=2	0.113475 0.142877 0.166078 0.188735 0.194132	0.166078
Q14247	112	CTTN	CTTN_C112	#CSQVDSVR	2	SRC8_HUMAN Src substrate cortactin OS=Homo sapiens OX=9606 GN=CTTN PE=1 SV=2	0.13816 0.352853	0.245506
Q69YN2	160	CWF19L1	CWF19L1_C160	#CVGNFGNSSGEVDTK #CVGNFGNSSGEVDTKK	5	C19L1_HUMAN CWF19-like protein 1 OS=Homo sapiens OX=9606 GN=CWF19L1 PE=1 SV=2	0.0847804 0.157962 0.181479 0.258617 0.280545	0.181479
Q16643	96	DBN1	DBN1_C96	#CACASHVAK	3	DREB_HUMAN Drebrin OS=Homo sapiens OX=9606 GN=DBN1 PE=1 SV=4	0.0736178 0.0758533 0.257594	0.0758533
Q9NVP1	183	DDX18	DDX18_C183	#CNLVNENTLK	4	DDX18_HUMAN ATP-dependent RNA helicase DDX18 OS=Homo sapiens OX=9606 GN=DDX18 PE=1 SV=2	0.0339433 0.0517796 0.0668453 0.145494	0.0593125
Q9NR30	161	DDX21	DDX21_C161	#CNPSEAASEESNSEIEQEIPVEQK	2	DDX21_HUMAN Nucleolar RNA helicase 2 OS=Homo sapiens OX=9606 GN=DDX21 PE=1 SV=5	0.000740466 0.00103567	0.000888068
P35659	222	DEK	DEK_C222	#CPEILSDESSSDEDEKK #CPEILSDESSSDEDEK	9	DEK_HUMAN Protein DEK OS=Homo sapiens OX=9606 GN=DEK PE=1 SV=1	0.00024369 0.00115407 0.00126648 0.00151327 0.00204935 0.00332061 0.00351127 0.004836 0.0120765	0.00204935
Q7L2E3	346	DHX30	DHX30_C346	#CTIQVPEPILR	1	DHX30_HUMAN ATP-dependent RNA helicase DHX30 OS=Homo sapiens OX=9606 GN=DHX30 PE=1 SV=1	0.264278	0.264278
Q9BTC0	455	DIDO1	DIDO1_C455	#CGAQAGIK	1	DIDO1_HUMAN Death-inducer obliterator 1 OS=Homo sapiens OX=9606 GN=DIDO1 PE=1 SV=5	0.292684	0.292684
P60981	46	DSTN	DSTN_C46	#CIIVEEGK	12	DEST_HUMAN Destrin OS=Homo sapiens OX=9606 GN=DSTN PE=1 SV=3	0.0388676 0.0404818 0.0445219 0.061665 0.0639864 0.0743048 0.0799115 0.0838708 0.137779 0.152644 0.153893 0.200106	0.0771082
P60981	23	DSTN	DSTN_C23	#CSTPEEIK #CSTPEEIKK	8	DEST_HUMAN Destrin OS=Homo sapiens OX=9606 GN=DSTN PE=1 SV=3	0.184878 0.217625 0.28163 0.283584 0.293231 0.327956 0.330817 0.369503	0.288407
P23919	31	DTYMK	DTYMK_C31	#CAAGHR	1	KTHY_HUMAN Thymidylate kinase OS=Homo sapiens OX=9606 GN=DTYMK PE=1 SV=4	0.230144	0.230144
P63167	24	DYNLL1	DYNLL1_C24	#CATQALEK	3	DYL1_HUMAN Dynein light chain 1, cytoplasmic OS=Homo sapiens OX=9606 GN=DYNLL1 PE=1 SV=1	0.139626 0.15959 0.348944	0.15959
P29692	247	EEF1D	EEF1D_C247	#CVVEDDKVGTDLLEEEITK	1	EF1D_HUMAN Elongation factor 1-delta OS=Homo sapiens OX=9606 GN=EEF1D PE=1 SV=5	0.00388798	0.00388798
P26641	266	EEF1G	EEF1G_C266	#CEQALAAEPK	13	EF1G_HUMAN Elongation factor 1-gamma OS=Homo sapiens OX=9606 GN=EEF1G PE=1 SV=3	0.0230991 0.0409658 0.0416301 0.0506067 0.0608845 0.0610213 0.0615823 0.0694667 0.0809722 0.13682 0.149167 0.179419 0.208055	0.0615823
P13639	369	EEF2	EEF2_C369	#CELLYEGPPDDEAAMGIK	2	EF2_HUMAN Elongation factor 2 OS=Homo sapiens OX=9606 GN=EEF2 PE=1 SV=4	8.40512e-05 0.232022	0.116053
P13639	536	EEF2	EEF2_C536	#CIIEESGEHIIA #CIIEESGEHIIAGA	5	EF2_HUMAN Elongation factor 2 OS=Homo sapiens OX=9606 GN=EEF2 PE=1 SV=4	0.0504872 0.0594114 0.0627107 0.109021 0.25247	0.0627107
P13639	728	EEF2	EEF2_C728	#CLYASVLTAQPR	3	EF2_HUMAN Elongation factor 2 OS=Homo sapiens OX=9606 GN=EEF2 PE=1 SV=4	0.108456 0.135279 0.226526	0.135279
P41091	105	EIF2S3	EIF2S3_C105	#CGSSTPDEFPTDIPGTK	1	IF2G_HUMAN Eukaryotic translation initiation factor 2 subunit 3 OS=Homo sapiens OX=9606 GN=EIF2S3 PE=1 SV=3	0.0858699	0.0858699
O75821	25	EIF3G	EIF3G_C25	#CVTSELLK	2	EIF3G_HUMAN Eukaryotic translation initiation factor 3 subunit G OS=Homo sapiens OX=9606 GN=EIF3G PE=1 SV=2	0.0729002 0.155562	0.114231
Q13347	57	EIF3I	EIF3I_C57	#CVDADWDTK	1	EIF3I_HUMAN Eukaryotic translation initiation factor 3 subunit I OS=Homo sapiens OX=9606 GN=EIF3I PE=1 SV=1	0.184842	0.184842
Q15056	85	EIF4H	EIF4H_C85	#CYVEFDEVDSLK	2	IF4H_HUMAN Eukaryotic translation initiation factor 4H OS=Homo sapiens OX=9606 GN=EIF4H PE=1 SV=5	0.0361016 0.0559913	0.0460465
Q9BQ52	609	ELAC2	ELAC2_C609	#CLQEGAEISSPAVER	1	RNZ2_HUMAN Zinc phosphodiesterase ELAC protein 2 OS=Homo sapiens OX=9606 GN=ELAC2 PE=1 SV=2	0.0191819	0.0191819
Q14241	339	ELOA	ELOA_C339	#CLPPSEAASDNHLK	1	ELOA1_HUMAN Elongin-A OS=Homo sapiens OX=9606 GN=ELOA PE=1 SV=2	0.0112162	0.0112162
O43491	867	EPB41L2	EPB41L2_C867	#CSEPPVVK	6	E41L2_HUMAN Band 4.1-like protein 2 OS=Homo sapiens OX=9606 GN=EPB41L2 PE=1 SV=1	0.0338105 0.0811764 0.161728 0.172482 0.2918 0.322528	0.167105
P07814	744	EPRS	EPRS_C744	#CTTSEDSLVLYNR	5	SYEP_HUMAN Bifunctional glutamate/proline--tRNA ligase OS=Homo sapiens OX=9606 GN=EPRS PE=1 SV=5	0.00891222 0.0374557 0.080555 0.102375 0.324011	0.080555
P07814	1487	EPRS	EPRS_C1487	#CELQPGAK	5	SYEP_HUMAN Bifunctional glutamate/proline--tRNA ligase OS=Homo sapiens OX=9606 GN=EPRS PE=1 SV=5	0.0149018 0.0244839 0.0825571 0.105297 0.212055	0.0825571
Q96A26	41	FAM162A	FAM162A_C41	#CTKPQESPGAPSR	1	F162A_HUMAN Protein FAM162A OS=Homo sapiens OX=9606 GN=FAM162A PE=1 SV=2	0.0882156	0.0882156
P49327	1118	FASN	FASN_C1118	#CFTPHTEEGCLSER	3	FAS_HUMAN Fatty acid synthase OS=Homo sapiens OX=9606 GN=FASN PE=1 SV=3	0.000961225 0.0281783 0.101228	0.0281783
P21333	2543	FLNA	FLNA_C2543	#CAPQHGAPGPGPADASK	5	FLNA_HUMAN Filamin-A OS=Homo sapiens OX=9606 GN=FLNA PE=1 SV=4	0.000345425 0.000508234 0.0124357 0.0270207 0.145703	0.0124357
P60520	15	GABARAPL2	GABARAPL2_C15	#CVESAK	1	GBRL2_HUMAN Gamma-aminobutyric acid receptor-associated protein-like 2 OS=Homo sapiens OX=9606 GN=GABARAPL2 PE=1 SV=1	0.340891	0.340891
Q14C86	568	GAPVD1	GAPVD1_C568	#CSDNLEGISEGPSNR	1	GAPD1_HUMAN GTPase-activating protein and VPS9 domain-containing protein 1 OS=Homo sapiens OX=9606 GN=GAPVD1 PE=1 SV=2	0.168068	0.168068
Q14C86	690	GAPVD1	GAPVD1_C690	#CLPGSGSVL	1	GAPD1_HUMAN GTPase-activating protein and VPS9 domain-containing protein 1 OS=Homo sapiens OX=9606 GN=GAPVD1 PE=1 SV=2	0.27903	0.27903
Q06210	264	GFPT1	GFPT1_C264	#CLFPVEEK	1	GFPT1_HUMAN Glutamine--fructose-6-phosphate aminotransferase [isomerizing] 1 OS=Homo sapiens OX=9606 GN=GFPT1 PE=1 SV=3	0.111063	0.111063
Q08379	64	GOLGA2	GOLGA2_C64	#CHSPEDTPK	1	GOGA2_HUMAN Golgin subfamily A member 2 OS=Homo sapiens OX=9606 GN=GOLGA2 PE=1 SV=3	0.228167	0.228167
P78347	745	GTF2I	GTF2I_C745	#CGEALGLK	2	GTF2I_HUMAN General transcription factor II-I OS=Homo sapiens OX=9606 GN=GTF2I PE=1 SV=2	0.251854 0.313802	0.282828
P84243	111	H3F3A	H3F3A_C111	#CAIHAK	1	H33_HUMAN Histone H3.3 OS=Homo sapiens OX=9606 GN=H3F3A PE=1 SV=2	0.308542	0.308542
O14929	376	HAT1	HAT1_C376	#CLRPEELTNQ	1	HAT1_HUMAN Histone acetyltransferase type B catalytic subunit OS=Homo sapiens OX=9606 GN=HAT1 PE=1 SV=1	0.136978	0.136978
O14929	27	HAT1	HAT1_C27	#CNTNTAIELK	1	HAT1_HUMAN Histone acetyltransferase type B catalytic subunit OS=Homo sapiens OX=9606 GN=HAT1 PE=1 SV=1	0.322606	0.322606
P51858	108	HDGF	HDGF_C108	#CVEEPEPEPEAAEGDGDK	1	HDGF_HUMAN Hepatoma-derived growth factor OS=Homo sapiens OX=9606 GN=HDGF PE=1 SV=1	0.07878	0.07878
P51858	12	HDGF	HDGF_C12	#CGDLVFAK	6	HDGF_HUMAN Hepatoma-derived growth factor OS=Homo sapiens OX=9606 GN=HDGF PE=1 SV=1	0.208941 0.232751 0.232923 0.251191 0.302207 0.353821	0.242057
P49773	84	HINT1	HINT1_C84	#CAADLGLNK	5	HINT1_HUMAN Histidine triad nucleotide-binding protein 1 OS=Homo sapiens OX=9606 GN=HINT1 PE=1 SV=2	0.0640979 0.0646737 0.0864028 0.250113 0.274281	0.0864028
P30519	265	HMOX2	HMOX2_C265	#CPFYAAEQDK	2	HMOX2_HUMAN Heme oxygenase 2 OS=Homo sapiens OX=9606 GN=HMOX2 PE=1 SV=2	0.0370194 0.248888	0.142954
P31943	267	HNRNPH1	HNRNPH1_C267	#CFSGMSDHR	1	HNRH1_HUMAN Heterogeneous nuclear ribonucleoprotein H OS=Homo sapiens OX=9606 GN=HNRNPH1 PE=1 SV=4	0.0477818	0.0477818
P14866	404	HNRNPL	HNRNPL_C404	#CLYGNVEK	3	HNRPL_HUMAN Heterogeneous nuclear ribonucleoprotein L OS=Homo sapiens OX=9606 GN=HNRNPL PE=1 SV=2	0.0782453 0.0929244 0.150658	0.0929244
O43390	226	HNRNPR	HNRNPR_C226	#CDSYEIRPGK	2	HNRPR_HUMAN Heterogeneous nuclear ribonucleoprotein R OS=Homo sapiens OX=9606 GN=HNRNPR PE=1 SV=1	0.0653802 0.0831887	0.0742845
Q9UJC3	432	HOOK1	HOOK1_C432	#CSQVQQDHLNQTDASATK	1	HOOK1_HUMAN Protein Hook homolog 1 OS=Homo sapiens OX=9606 GN=HOOK1 PE=1 SV=2	0.00128345	0.00128345
P00492	106	HPRT1	HPRT1_C106	#CNDQSTGDIK	4	HPRT_HUMAN Hypoxanthine-guanine phosphoribosyltransferase OS=Homo sapiens OX=9606 GN=HPRT1 PE=1 SV=2	0.0191685 0.0339545 0.0624532 0.0935356	0.0482038
P0DMV8	574	HSPA1A	HSPA1A_C574	#CQEVISW	1	HS71A_HUMAN Heat shock 70 kDa protein 1A OS=Homo sapiens OX=9606 GN=HSPA1A PE=1 SV=1	0.161786	0.161786
P34932	34	HSPA4	HSPA4_C34	#CTPACISFGPK	4	HSP74_HUMAN Heat shock 70 kDa protein 4 OS=Homo sapiens OX=9606 GN=HSPA4 PE=1 SV=4	0.0388688 0.0438576 0.076061 0.0930576	0.0599593
O95757	540	HSPA4L	HSPA4L_C540	#CHAEHTPEEEIDHTGAK	5	HS74L_HUMAN Heat shock 70 kDa protein 4L OS=Homo sapiens OX=9606 GN=HSPA4L PE=1 SV=3	0.000187966 0.000555337 0.00568044 0.0255584 0.0378038	0.00568044
P11142	574	HSPA8	HSPA8_C574	#CNEIINWLDK	2	HSP7C_HUMAN Heat shock cognate 71 kDa protein OS=Homo sapiens OX=9606 GN=HSPA8 PE=1 SV=1	0.114766 0.214869	0.164818
P10809	447	HSPD1	HSPD1_C447	#CIPALDSLTPANEDQK	4	CH60_HUMAN 60 kDa heat shock protein, mitochondrial OS=Homo sapiens OX=9606 GN=HSPD1 PE=1 SV=2	0.00466626 0.00694255 0.0713828 0.201075	0.0391627
Q92598	34	HSPH1	HSPH1_C34	#CTPSVISFGSK	2	HS105_HUMAN Heat shock protein 105 kDa OS=Homo sapiens OX=9606 GN=HSPH1 PE=1 SV=1	0.15305 0.165444	0.159247
Q9NSE4	1005	IARS2	IARS2_C1005	#CAEVVSGK	1	SYIM_HUMAN Isoleucine--tRNA ligase, mitochondrial OS=Homo sapiens OX=9606 GN=IARS2 PE=1 SV=2	0.307005	0.307005
O75874	73	IDH1	IDH1_C73	#CATITPDEK	2	IDHC_HUMAN Isocitrate dehydrogenase [NADP] cytoplasmic OS=Homo sapiens OX=9606 GN=IDH1 PE=1 SV=2	0.202625 0.309711	0.256168
P51553	81	IDH3G	IDH3G_C81	#CVPVDFEEVHVS	2	IDH3G_HUMAN Isocitrate dehydrogenase [NAD] subunit gamma, mitochondrial OS=Homo sapiens OX=9606 GN=IDH3G PE=1 SV=1	0.121929 0.244883	0.183406
Q9H0C8	301	ILKAP	ILKAP_C301	#CGVTSVPDIR	2	ILKAP_HUMAN Integrin-linked kinase-associated serine/threonine phosphatase 2C OS=Homo sapiens OX=9606 GN=ILKAP PE=1 SV=1	0.266378 0.291023	0.278701
O14654	1065	IRS4	IRS4_C1065	#CSEPPPVAR	1	IRS4_HUMAN Insulin receptor substrate 4 OS=Homo sapiens OX=9606 GN=IRS4 PE=1 SV=1	0.196589	0.196589
O14654	522	IRS4	IRS4_C522	#CSGEGQGSR	1	IRS4_HUMAN Insulin receptor substrate 4 OS=Homo sapiens OX=9606 GN=IRS4 PE=1 SV=1	0.210371	0.210371
Q9H9L3	168	ISG20L2	ISG20L2_C168	#CSGASQK	1	I20L2_HUMAN Interferon-stimulated 20 kDa exonuclease-like 2 OS=Homo sapiens OX=9606 GN=ISG20L2 PE=1 SV=1	0.250265	0.250265
Q1ED39	78	KNOP1	KNOP1_C78	#CEEHVEPETTLPAR	2	KNOP1_HUMAN Lysine-rich nucleolar protein 1 OS=Homo sapiens OX=9606 GN=KNOP1 PE=1 SV=1	0.0171974 0.142092	0.0796447
P50851	1228	LRBA	LRBA_C1228	#CHGSVSEASSEQK	2	LRBA_HUMAN Lipopolysaccharide-responsive and beige-like anchor protein OS=Homo sapiens OX=9606 GN=LRBA PE=1 SV=4	0.0845541 0.111102	0.097828
Q32MZ4	750	LRRFIP1	LRRFIP1_C750	#CEMSEHPSQTVR	1	LRRF1_HUMAN Leucine-rich repeat flightless-interacting protein 1 OS=Homo sapiens OX=9606 GN=LRRFIP1 PE=1 SV=2	0.141658	0.141658
Q5U5X0	97	LYRM7	LYRM7_C97	#CDAPTQK	1	LYRM7_HUMAN Complex III assembly factor LYRM7 OS=Homo sapiens OX=9606 GN=LYRM7 PE=1 SV=1	0.16729	0.16729
P27816	635	MAP4	MAP4_C635	#CSLPAEEDSVLEK	9	MAP4_HUMAN Microtubule-associated protein 4 OS=Homo sapiens OX=9606 GN=MAP4 PE=1 SV=3	0.000260929 0.000416145 0.00129909 0.00303647 0.00475709 0.00821439 0.0121286 0.0239455 0.220116	0.00475709
P49736	624	MCM2	MCM2_C624	#CTVIAAANPIGGR	1	MCM2_HUMAN DNA replication licensing factor MCM2 OS=Homo sapiens OX=9606 GN=MCM2 PE=1 SV=4	0.0377892	0.0377892
P46013	958	MKI67	MKI67_C958	#CAPMSDLTDLK	4	KI67_HUMAN Proliferation marker protein Ki-67 OS=Homo sapiens OX=9606 GN=MKI67 PE=1 SV=2	0.0424553 0.0447219 0.100018 0.336578	0.07237
P52815	45	MRPL12	MRPL12_C45	#CEALAGAPLDNAPK	9	RM12_HUMAN 39S ribosomal protein L12, mitochondrial OS=Homo sapiens OX=9606 GN=MRPL12 PE=1 SV=2	0.00652966 0.00690905 0.0132987 0.0187639 0.036897 0.0796479 0.131923 0.164899 0.169314	0.036897
P35579	1379	MYH9	MYH9_C1379	#CLETAEEVKR #CLETAEEVK	7	MYH9_HUMAN Myosin-9 OS=Homo sapiens OX=9606 GN=MYH9 PE=1 SV=4	0.0257423 0.0262484 0.0502523 0.0506975 0.0553133 0.0599259 0.0652099	0.0506975
P35579	172	MYH9	MYH9_C172	#CTGESGAGK	1	MYH9_HUMAN Myosin-9 OS=Homo sapiens OX=9606 GN=MYH9 PE=1 SV=4	0.145953	0.145953
P35579	91	MYH9	MYH9_C91	#CLNEASVLHNLK	1	MYH9_HUMAN Myosin-9 OS=Homo sapiens OX=9606 GN=MYH9 PE=1 SV=4	0.124908	0.124908
P60660	2	MYL6	MYL6_C2	#CDFTEDQTAEFK	7	MYL6_HUMAN Myosin light polypeptide 6 OS=Homo sapiens OX=9606 GN=MYL6 PE=1 SV=2	0.00755914 0.046566 0.0470084 0.0712172 0.183842 0.1982 0.23286	0.0712172
P55209	88	NAP1L1	NAP1L1_C88	#CAQIEAK	3	NP1L1_HUMAN Nucleosome assembly protein 1-like 1 OS=Homo sapiens OX=9606 GN=NAP1L1 PE=1 SV=1	0.11894 0.196162 0.260115	0.196162
P49321	708	NASP	NASP_C708	#CVTDISHLVR #CVTDISHL	3	NASP_HUMAN Nuclear autoantigenic sperm protein OS=Homo sapiens OX=9606 GN=NASP PE=1 SV=2	0.0988133 0.180257 0.203813	0.180257
P13591	96	NCAM1	NCAM1_C96	#CVVTGEDGSESEATVNVK	1	NCAM1_HUMAN Neural cell adhesion molecule 1 OS=Homo sapiens OX=9606 GN=NCAM1 PE=1 SV=3	0.124173	0.124173
O14777	528	NDC80	NDC80_C528	#CASELESLEK	2	NDC80_HUMAN Kinetochore protein NDC80 homolog OS=Homo sapiens OX=9606 GN=NDC80 PE=1 SV=1	0.154207 0.268653	0.21143
O15226	424	NKRF	NKRF_C424	#CHTGSSPR	1	NKRF_HUMAN NF-kappa-B-repressing factor OS=Homo sapiens OX=9606 GN=NKRF PE=1 SV=2	0.122642	0.122642
O15226	37	NKRF	NKRF_C37	#CDGQNPPKK	2	NKRF_HUMAN NF-kappa-B-repressing factor OS=Homo sapiens OX=9606 GN=NKRF PE=1 SV=2	0.32624 0.352457	0.339348
Q15233	145	NONO	NONO_C145	#CHSASLTVR	1	NONO_HUMAN Non-POU domain-containing octamer-binding protein OS=Homo sapiens OX=9606 GN=NONO PE=1 SV=4	0.20932	0.20932
P78316	457	NOP14	NOP14_C457	#CNHPSLAEGNK	4	NOP14_HUMAN Nucleolar protein 14 OS=Homo sapiens OX=9606 GN=NOP14 PE=1 SV=3	0.0137006 0.0833169 0.115996 0.292457	0.0996564
Q9Y2X3	507	NOP58	NOP58_C507	#CTSTAIASPEK	1	NOP58_HUMAN Nucleolar protein 58 OS=Homo sapiens OX=9606 GN=NOP58 PE=1 SV=1	0.278327	0.278327
P06748	104	NPM1	NPM1_C104	#CGSGPVHISGQHLVAVEEDAESEDEEEEDVK #CGSGPVHISGQ #CGSGPVHIS	3	NPM_HUMAN Nucleophosmin OS=Homo sapiens OX=9606 GN=NPM1 PE=1 SV=2	0.00452217 0.249131 0.290602	0.249131
Q9H0G5	232	NSRP1	NSRP1_C232	#CILQTDVKVEENPDADSDFDAK	1	NSRP1_HUMAN Nuclear speckle splicing regulatory protein 1 OS=Homo sapiens OX=9606 GN=NSRP1 PE=1 SV=1	0.0385606	0.0385606
Q08J23	758	NSUN2	NSUN2_C758	#CDPAGVHPPR	3	NSUN2_HUMAN tRNA (cytosine(34)-C(5))-methyltransferase OS=Homo sapiens OX=9606 GN=NSUN2 PE=1 SV=2	0.108361 0.148598 0.274899	0.148598
Q9BQG2	18	NUDT12	NUDT12_C18	#CSAAEGDIAK	1	NUD12_HUMAN Peroxisomal NADH pyrophosphatase NUDT12 OS=Homo sapiens OX=9606 GN=NUDT12 PE=1 SV=1	0.184589	0.184589
Q14980	1907	NUMA1	NUMA1_C1907	#CQDEPEQLDDWNR	2	NUMA1_HUMAN Nuclear mitotic apparatus protein 1 OS=Homo sapiens OX=9606 GN=NUMA1 PE=1 SV=2	0.0880003 0.196468	0.142234
P49790	404	NUP153	NUP153_C404	#CSTGYEK	3	NU153_HUMAN Nuclear pore complex protein Nup153 OS=Homo sapiens OX=9606 GN=NUP153 PE=1 SV=2	0.196188 0.280112 0.342846	0.280112
P52948	1476	NUP98	NUP98_C1476	#CVIAEEQNSQTPLR	1	NUP98_HUMAN Nuclear pore complex protein Nup98-Nup96 OS=Homo sapiens OX=9606 GN=NUP98 PE=1 SV=4	0.0576047	0.0576047
P11940	339	PABPC1	PABPC1_C339	#CFSSPEEATK	1	PABP1_HUMAN Polyadenylate-binding protein 1 OS=Homo sapiens OX=9606 GN=PABPC1 PE=1 SV=2	0.356439	0.356439
Q15365	201	PCBP1	PCBP1_C201	#CSDAAGYPH	1	PCBP1_HUMAN Poly(rC)-binding protein 1 OS=Homo sapiens OX=9606 GN=PCBP1 PE=1 SV=2	0.232193	0.232193
P12004	81	PCNA	PCNA_C81	#CAGNEDIITLR	1	PCNA_HUMAN Proliferating cell nuclear antigen OS=Homo sapiens OX=9606 GN=PCNA PE=1 SV=1	0.128369	0.128369
O15067	270	PFAS	PFAS_C270	#CDNSSAIQGK	3	PUR4_HUMAN Phosphoribosylformylglycinamidine synthase OS=Homo sapiens OX=9606 GN=PFAS PE=1 SV=4	0.0584778 0.129279 0.380658	0.129279
P00558	50	PGK1	PGK1_C50	#CLDNGAK	2	PGK1_HUMAN Phosphoglycerate kinase 1 OS=Homo sapiens OX=9606 GN=PGK1 PE=1 SV=3	0.203515 0.280608	0.242062
Q96BK5	94	PINX1	PINX1_C94	#CHGQETTDSSDKK	1	PINX1_HUMAN PIN2/TERF1-interacting telomerase inhibitor 1 OS=Homo sapiens OX=9606 GN=PINX1 PE=1 SV=2	0.127171	0.127171
P14618	424	PKM	PKM_C424	#CSGAIIVLTK #CSGAIIVL	6	KPYM_HUMAN Pyruvate kinase PKM OS=Homo sapiens OX=9606 GN=PKM PE=1 SV=4	0.0375601 0.0474878 0.161747 0.189101 0.29183 0.299011	0.175424
P14618	423	PKM	PKM_C423	#CCSGAIIVLTK	1	KPYM_HUMAN Pyruvate kinase PKM OS=Homo sapiens OX=9606 GN=PKM PE=1 SV=4	0.14898	0.14898
P53350	67	PLK1	PLK1_C67	#CFEISDADTK	1	PLK1_HUMAN Serine/threonine-protein kinase PLK1 OS=Homo sapiens OX=9606 GN=PLK1 PE=1 SV=1	0.257943	0.257943
P13797	104	PLS3	PLS3_C104	#CALGGTSELSSEGTQHSYSEEEK	3	PLST_HUMAN Plastin-3 OS=Homo sapiens OX=9606 GN=PLS3 PE=1 SV=4	0.000176067 0.000329222 0.0194162	0.000329222
P13797	566	PLS3	PLS3_C566	#CINYDLVK	1	PLST_HUMAN Plastin-3 OS=Homo sapiens OX=9606 GN=PLS3 PE=1 SV=4	0.265402	0.265402
Q9BY77	338	POLDIP3	POLDIP3_C338	#CLDGQPMK	1	PDIP3_HUMAN Polymerase delta-interacting protein 3 OS=Homo sapiens OX=9606 GN=POLDIP3 PE=1 SV=2	0.126764	0.126764
Q15181	274	PPA1	PPA1_C274	#CTVPTDVDK #CTVPTDVDKW	8	IPYR_HUMAN Inorganic pyrophosphatase OS=Homo sapiens OX=9606 GN=PPA1 PE=1 SV=2	0.0192096 0.0206022 0.0245085 0.0321318 0.163613 0.223062 0.36801 0.37329	0.0978724
Q9NQ55	391	PPAN	PPAN_C391	#CQAVGEAPSEDLFPEAK	1	SSF1_HUMAN Suppressor of SWI4 1 homolog OS=Homo sapiens OX=9606 GN=PPAN PE=2 SV=1	0.0574194	0.0574194
O15355	13	PPM1G	PPM1G_C13	#CSGDGVGAPR	4	PPM1G_HUMAN Protein phosphatase 1G OS=Homo sapiens OX=9606 GN=PPM1G PE=1 SV=1	0.0741577 0.0801103 0.257277 0.350286	0.168694
O15355	241	PPM1G	PPM1G_C241	#CSSASDK	3	PPM1G_HUMAN Protein phosphatase 1G OS=Homo sapiens OX=9606 GN=PPM1G PE=1 SV=1	0.102919 0.125448 0.289921	0.125448
O15355	351	PPM1G	PPM1G_C351	#CVVSEAGK	2	PPM1G_HUMAN Protein phosphatase 1G OS=Homo sapiens OX=9606 GN=PPM1G PE=1 SV=1	0.14157 0.316256	0.228913
Q14738	17	PPP2R5D	PPP2R5D_C17	#CTAKPSSSGK	1	2A5D_HUMAN Serine/threonine-protein phosphatase 2A 56 kDa regulatory subunit delta isoform OS=Homo sapiens OX=9606 GN=PPP2R5D PE=1 SV=1	0.229255	0.229255
P30048	60	PRDX3	PRDX3_C60	#CHAPAVTQ #CHAPAVT	4	PRDX3_HUMAN Thioredoxin-dependent peroxide reductase, mitochondrial OS=Homo sapiens OX=9606 GN=PRDX3 PE=1 SV=3	0.0471237 0.0515655 0.161686 0.282437	0.106626
P78527	25	PRKDC	PRKDC_C25	#CGAALAGHQLIR #CGAALAGH	2	PRKDC_HUMAN DNA-dependent protein kinase catalytic subunit OS=Homo sapiens OX=9606 GN=PRKDC PE=1 SV=3	0.00624152 0.328893	0.167567
P78527	1904	PRKDC	PRKDC_C1904	#CITEGNELTK	3	PRKDC_HUMAN DNA-dependent protein kinase catalytic subunit OS=Homo sapiens OX=9606 GN=PRKDC PE=1 SV=3	0.0121691 0.0162618 0.0667169	0.0162618
Q99873	33	PRMT1	PRMT1_C33	#CGQAESSEKPNAEDMTSK	3	ANM1_HUMAN Protein arginine N-methyltransferase 1 OS=Homo sapiens OX=9606 GN=PRMT1 PE=1 SV=3	0.000716676 0.0103122 0.233424	0.0103122
Q9Y520	223	PRRC2C	PRRC2C_C223	#CGPPQAK	2	PRC2C_HUMAN Protein PRRC2C OS=Homo sapiens OX=9606 GN=PRRC2C PE=1 SV=4	0.148146 0.2442	0.196173
P49721	163	PSMB2	PSMB2_C163	#CLEELQK	1	PSB2_HUMAN Proteasome subunit beta type-2 OS=Homo sapiens OX=9606 GN=PSMB2 PE=1 SV=1	0.268497	0.268497
O00231	289	PSMD11	PSMD11_C289	#CVAQASK	3	PSD11_HUMAN 26S proteasome non-ATPase regulatory subunit 11 OS=Homo sapiens OX=9606 GN=PSMD11 PE=1 SV=3	0.163577 0.268007 0.272969	0.268007
Q9UL46	91	PSME2	PSME2_C91	#CGFLPGNEK	3	PSME2_HUMAN Proteasome activator complex subunit 2 OS=Homo sapiens OX=9606 GN=PSME2 PE=1 SV=4	0.0858087 0.138583 0.235336	0.138583
P61289	92	PSME3	PSME3_C92	#CEEAFQGTK	2	PSME3_HUMAN Proteasome activator complex subunit 3 OS=Homo sapiens OX=9606 GN=PSME3 PE=1 SV=1	0.239834 0.326472	0.283153
P26599	23	PTBP1	PTBP1_C23	#CVTNGPFIMSSNSASAANGNDSK	1	PTBP1_HUMAN Polypyrimidine tract-binding protein 1 OS=Homo sapiens OX=9606 GN=PTBP1 PE=1 SV=1	0.00951326	0.00951326
Q15185	58	PTGES3	PTGES3_C58	#CIDPNDSK	9	TEBP_HUMAN Prostaglandin E synthase 3 OS=Homo sapiens OX=9606 GN=PTGES3 PE=1 SV=1	0.0758091 0.107053 0.107397 0.126455 0.129977 0.155189 0.188197 0.227467 0.379318	0.129977
Q15185	40	PTGES3	PTGES3_C40	#CLGGSDNFK	1	TEBP_HUMAN Prostaglandin E synthase 3 OS=Homo sapiens OX=9606 GN=PTGES3 PE=1 SV=1	0.184342	0.184342
Q15269	60	PWP2	PWP2_C60	#CVGLSPDGR	1	PWP2_HUMAN Periodic tryptophan protein 2 homolog OS=Homo sapiens OX=9606 GN=PWP2 PE=2 SV=2	0.322488	0.322488
P51148	64	RAB5C	RAB5C_C64	#CLDDTTVK	1	RAB5C_HUMAN Ras-related protein Rab-5C OS=Homo sapiens OX=9606 GN=RAB5C PE=1 SV=2	0.208555	0.208555
P49792	1791	RANBP2	RANBP2_C1791	#CVQNESSSLK	4	RBP2_HUMAN E3 SUMO-protein ligase RanBP2 OS=Homo sapiens OX=9606 GN=RANBP2 PE=1 SV=2	0.0664416 0.0884386 0.133308 0.154236	0.110873
P49792	815	RANBP2	RANBP2_C815	#CQQVEAIK	2	RBP2_HUMAN E3 SUMO-protein ligase RanBP2 OS=Homo sapiens OX=9606 GN=RANBP2 PE=1 SV=2	0.112918 0.203168	0.158043
P49792	2696	RANBP2	RANBP2_C2696	#CRPLEENTADNEK	1	RBP2_HUMAN E3 SUMO-protein ligase RanBP2 OS=Homo sapiens OX=9606 GN=RANBP2 PE=1 SV=2	0.313634	0.313634
P61224	118	RAP1B	RAP1B_C118	#CDLEDERVVGK	1	RAP1B_HUMAN Ras-related protein Rap-1b OS=Homo sapiens OX=9606 GN=RAP1B PE=1 SV=1	0.159739	0.159739
Q8IY67	255	RAVER1	RAVER1_C255	#CGQDGQLK	1	RAVR1_HUMAN Ribonucleoprotein PTB-binding 1 OS=Homo sapiens OX=9606 GN=RAVER1 PE=1 SV=1	0.176393	0.176393
Q16576	97	RBBP7	RBBP7_C97	#CDSDKGEFGGFGSVTGK	2	RBBP7_HUMAN Histone-binding protein RBBP7 OS=Homo sapiens OX=9606 GN=RBBP7 PE=1 SV=1	0.0902908 0.308384	0.199337
Q9NW13	392	RBM28	RBM28_C392	#CLLAASPENEAGGLK	4	RBM28_HUMAN RNA-binding protein 28 OS=Homo sapiens OX=9606 GN=RBM28 PE=1 SV=3	0.0165282 0.0174735 0.0326628 0.0358197	0.0250681
Q9P258	42	RCC2	RCC2_C42	#CSSSSGGGSSGDEDGLELDGAPGGGK	1	RCC2_HUMAN Protein RCC2 OS=Homo sapiens OX=9606 GN=RCC2 PE=1 SV=2	0.00591918	0.00591918
P46063	606	RECQL	RECQL_C606	#CHSEQGDK	1	RECQ1_HUMAN ATP-dependent DNA helicase Q1 OS=Homo sapiens OX=9606 GN=RECQL PE=1 SV=3	0.172477	0.172477
Q96TC7	128	RMDN3	RMDN3_C128	#CHMEENQR	1	RMD3_HUMAN Regulator of microtubule dynamics protein 3 OS=Homo sapiens OX=9606 GN=RMDN3 PE=1 SV=2	0.302585	0.302585
Q99496	179	RNF2	RNF2_C179	#CSNASTHSNQEAGPSNK	1	RING2_HUMAN E3 ubiquitin-protein ligase RING2 OS=Homo sapiens OX=9606 GN=RNF2 PE=1 SV=1	0.0193846	0.0193846
P30050	17	RPL12	RPL12_C17	#CTGGEVGATSALAPK	3	RL12_HUMAN 60S ribosomal protein L12 OS=Homo sapiens OX=9606 GN=RPL12 PE=1 SV=1	0.00222745 0.191381 0.249719	0.191381
Q02543	22	RPL18A	RPL18A_C22	#CHTPPLYR	6	RL18A_HUMAN 60S ribosomal protein L18a OS=Homo sapiens OX=9606 GN=RPL18A PE=1 SV=2	0.0962712 0.116419 0.119429 0.14357 0.257592 0.289041	0.131499
P62829	28	RPL23	RPL23_C28	#CADNTGAK	4	RL23_HUMAN 60S ribosomal protein L23 OS=Homo sapiens OX=9606 GN=RPL23 PE=1 SV=1	0.0522505 0.0677687 0.101984 0.268802	0.0848764
P83731	36	RPL24	RPL24_C36	#CESAFLSK	4	RL24_HUMAN 60S ribosomal protein L24 OS=Homo sapiens OX=9606 GN=RPL24 PE=1 SV=1	0.0896766 0.183425 0.195544 0.267859	0.189485
P61927	37	RPL37	RPL37_C37	#CGYPAK	2	RL37_HUMAN 60S ribosomal protein L37 OS=Homo sapiens OX=9606 GN=RPL37 PE=1 SV=2	0.239869 0.311472	0.27567
P62917	115	RPL8	RPL8_C115	#CLEEKPGDR	1	RL8_HUMAN 60S ribosomal protein L8 OS=Homo sapiens OX=9606 GN=RPL8 PE=1 SV=2	0.137917	0.137917
P32969	134	RPL9	RPL9_C134	#CSVSQAQK	1	RL9_HUMAN 60S ribosomal protein L9 OS=Homo sapiens OX=9606 GN=RPL9 PE=1 SV=1	0.355125	0.355125
P05388	27	RPLP0	RPLP0_C27	#CFIVGADNVGSK	9	RLA0_HUMAN 60S acidic ribosomal protein P0 OS=Homo sapiens OX=9606 GN=RPLP0 PE=1 SV=1	0.000729202 0.00245363 0.00254025 0.00891831 0.0124158 0.0807931 0.237428 0.279954 0.316768	0.0124158
P05388	119	RPLP0	RPLP0_C119	#CEVTVPAQNTGLGPEK	2	RLA0_HUMAN 60S acidic ribosomal protein P0 OS=Homo sapiens OX=9606 GN=RPLP0 PE=1 SV=1	0.00701106 0.0166696	0.0118403
P05386	61	RPLP1	RPLP1_C61	#CNVGAGGPAPAAGAAPAGGPAPSTAAAPAEEK	1	RLA1_HUMAN 60S acidic ribosomal protein P1 OS=Homo sapiens OX=9606 GN=RPLP1 PE=1 SV=1	0.000315931	0.000315931
Q5VT52	1071	RPRD2	RPRD2_C1071	#CLDLPDSTEEK	1	RPRD2_HUMAN Regulation of nuclear pre-mRNA domain-containing protein 2 OS=Homo sapiens OX=9606 GN=RPRD2 PE=1 SV=1	0.270999	0.270999
P62280	60	RPS11	RPS11_C60	#CPFTGNVSIR	2	RS11_HUMAN 40S ribosomal protein S11 OS=Homo sapiens OX=9606 GN=RPS11 PE=1 SV=3	0.065442 0.0811026	0.0732723
P25398	69	RPS12	RPS12_C69	#CAEHQINLIK	3	RS12_HUMAN 40S ribosomal protein S12 OS=Homo sapiens OX=9606 GN=RPS12 PE=1 SV=3	0.0486093 0.152009 0.159203	0.152009
P62244	72	RPS15A	RPS15A_C72	#CGVISPR	1	RS15A_HUMAN 40S ribosomal protein S15a OS=Homo sapiens OX=9606 GN=RPS15A PE=1 SV=2	0.38513	0.38513
P62979	149	RPS27A	RPS27A_C149	#CFNKPEDK	3	RS27A_HUMAN Ubiquitin-40S ribosomal protein S27a OS=Homo sapiens OX=9606 GN=RPS27A PE=1 SV=2	0.141931 0.189371 0.190498	0.189371
P23396	134	RPS3	RPS3_C134	#CEVVVSGK	2	RS3_HUMAN 40S ribosomal protein S3 OS=Homo sapiens OX=9606 GN=RPS3 PE=1 SV=2	0.122411 0.201507	0.161959
Q14684	386	RRP1B	RRP1B_C386	#CVEEEDSESSLQK	1	RRP1B_HUMAN Ribosomal RNA processing protein 1 homolog B OS=Homo sapiens OX=9606 GN=RRP1B PE=1 SV=3	0.086123	0.086123
Q15050	52	RRS1	RRS1_C52	#CAGPTPEAELQALAR	2	RRS1_HUMAN Ribosome biogenesis regulatory protein homolog OS=Homo sapiens OX=9606 GN=RRS1 PE=1 SV=2	0.00451547 0.0332682	0.0188918
Q9Y3I0	427	RTCB	RTCB_C427	#CHGAGR	1	RTCB_HUMAN tRNA-splicing ligase RtcB homolog OS=Homo sapiens OX=9606 GN=RTCB PE=1 SV=1	0.351219	0.351219
Q15424	362	SAFB	SAFB_C362	#CNEVPPAPK	5	SAFB1_HUMAN Scaffold attachment factor B1 OS=Homo sapiens OX=9606 GN=SAFB PE=1 SV=4	0.0853431 0.155358 0.173241 0.18513 0.19675	0.173241
Q15020	670	SART3	SART3_C670	#CAAVDVEPPSK	8	SART3_HUMAN Squamous cell carcinoma antigen recognized by T-cells 3 OS=Homo sapiens OX=9606 GN=SART3 PE=1 SV=1	0.0209616 0.0413561 0.0487505 0.0487649 0.0660118 0.0781336 0.0822932 0.340298	0.0573883
Q92599	49	SEPTIN8	SEPTIN8_C49	#CVGETGIGK	2	SEPT8_HUMAN Septin-8 OS=Homo sapiens OX=9606 GN=SEPTIN8 PE=1 SV=4	0.041706 0.249382	0.145544
Q9UHD8	248	SEPTIN9	SEPTIN9_C248	#CVGDMADTPR #CVGDMADTPRDAGLK	3	SEPT9_HUMAN Septin-9 OS=Homo sapiens OX=9606 GN=SEPTIN9 PE=1 SV=2	0.0740555 0.0929657 0.24799	0.0929657
P23246	431	SFPQ	SFPQ_C431	#CSEGVFLLTTTPR	1	SFPQ_HUMAN Splicing factor, proline- and glutamine-rich OS=Homo sapiens OX=9606 GN=SFPQ PE=1 SV=2	0.0465305	0.0465305
O43765	153	SGTA	SGTA_C153	#CIDPAYSK	1	SGTA_HUMAN Small glutamine-rich tetratricopeptide repeat-containing protein alpha OS=Homo sapiens OX=9606 GN=SGTA PE=1 SV=1	0.0964924	0.0964924
Q15464	224	SHB	SHB_C224	#CAASAAEESGAGKK	2	SHB_HUMAN SH2 domain-containing adapter protein B OS=Homo sapiens OX=9606 GN=SHB PE=1 SV=2	0.0119841 0.0837925	0.0478883
Q9Y6M5	469	SLC30A1	SLC30A1_C469	#CLELSNNLEK	1	ZNT1_HUMAN Zinc transporter 1 OS=Homo sapiens OX=9606 GN=SLC30A1 PE=1 SV=3	0.0866027	0.0866027
Q92922	761	SMARCC1	SMARCC1_C761	#CIAGTGPDEPEKLEGAEEEK	2	SMRC1_HUMAN SWI/SNF complex subunit SMARCC1 OS=Homo sapiens OX=9606 GN=SMARCC1 PE=1 SV=3	0.00223359 0.00527053	0.00375206
Q92925	405	SMARCD2	SMARCD2_C405	#CYDIDVEVDDPLK	1	SMRD2_HUMAN SWI/SNF-related matrix-associated actin-dependent regulator of chromatin subfamily D member 2 OS=Homo sapiens OX=9606 GN=SMARCD2 PE=1 SV=3	0.290717	0.290717
A6NHR9	1656	SMCHD1	SMCHD1_C1656	#CQVEEARLK	1	SMHD1_HUMAN Structural maintenance of chromosomes flexible hinge domain-containing protein 1 OS=Homo sapiens OX=9606 GN=SMCHD1 PE=1 SV=2	0.149868	0.149868
Q16637	60	SMN1	SMN1_C60	#CETSGKPK	1	SMN_HUMAN Survival motor neuron protein OS=Homo sapiens OX=9606 GN=SMN1 PE=1 SV=1	0.25769	0.25769
P62306	66	SNRPF	SNRPF_C66	#CNNVLYIR	1	RUXF_HUMAN Small nuclear ribonucleoprotein F OS=Homo sapiens OX=9606 GN=SNRPF PE=1 SV=1	0.292971	0.292971
Q15005	17	SPCS2	SPCS2_C17	#CSGAGGASNCGTGSGR	3	SPCS2_HUMAN Signal peptidase complex subunit 2 OS=Homo sapiens OX=9606 GN=SPCS2 PE=1 SV=3	0.0119081 0.0177774 0.0193818	0.0177774
Q68D10	535	SPTY2D1	SPTY2D1_C535	#CTVVSETISSK	2	SPT2_HUMAN Protein SPT2 homolog OS=Homo sapiens OX=9606 GN=SPTY2D1 PE=1 SV=3	0.109584 0.19793	0.153757
P19623	123	SRM	SRM_C123	#CEIDEDVIQVSK	1	SPEE_HUMAN Spermidine synthase OS=Homo sapiens OX=9606 GN=SRM PE=1 SV=1	0.0332942	0.0332942
Q9UHB9	562	SRP68	SRP68_C562	#CLDPSLVTK	3	SRP68_HUMAN Signal recognition particle subunit SRP68 OS=Homo sapiens OX=9606 GN=SRP68 PE=1 SV=2	0.152881 0.298212 0.301215	0.298212
Q9UQ35	872	SRRM2	SRRM2_C872	#CFESSPDPELK	2	SRRM2_HUMAN Serine/arginine repetitive matrix protein 2 OS=Homo sapiens OX=9606 GN=SRRM2 PE=1 SV=2	0.281855 0.325709	0.303782
Q13247	121	SRSF6	SRSF6_C121	#CSWQDLK	2	SRSF6_HUMAN Serine/arginine-rich splicing factor 6 OS=Homo sapiens OX=9606 GN=SRSF6 PE=1 SV=2	0.173941 0.277536	0.225739
O43805	18	SSNA1	SSNA1_C18	#CIEELCQK	3	SSNA1_HUMAN Sjoegren syndrome nuclear autoantigen 1 OS=Homo sapiens OX=9606 GN=SSNA1 PE=1 SV=2	0.0457965 0.106682 0.252735	0.106682
O94804	888	STK10	STK10_C888	#CHLLVEHETQK	8	STK10_HUMAN Serine/threonine-protein kinase 10 OS=Homo sapiens OX=9606 GN=STK10 PE=1 SV=1	0.00140471 0.00194086 0.00418331 0.00625313 0.0171547 0.0507592 0.22211 0.245174	0.0117039
Q9Y3F4	305	STRAP	STRAP_C305	#CVLPEEDSGELAKPK #CVLPEEDSGELAK	11	STRAP_HUMAN Serine-threonine kinase receptor-associated protein OS=Homo sapiens OX=9606 GN=STRAP PE=1 SV=1	0.000272165 0.000318013 0.000333982 0.00214083 0.0021732 0.00795293 0.0085814 0.0140065 0.0302565 0.0306944 0.0358913	0.00795293
O43815	765	STRN	STRN_C765	#CYIASAGADALAK	1	STRN_HUMAN Striatin OS=Homo sapiens OX=9606 GN=STRN PE=1 SV=4	0.32069	0.32069
O00267	740	SUPT5H	SUPT5H_C740	#CQTISVDR	1	SPT5H_HUMAN Transcription elongation factor SPT5 OS=Homo sapiens OX=9606 GN=SUPT5H PE=1 SV=1	0.173807	0.173807
Q96A49	283	SYAP1	SYAP1_C283	#CNLNQEDLRK	2	SYAP1_HUMAN Synapse-associated protein 1 OS=Homo sapiens OX=9606 GN=SYAP1 PE=1 SV=1	0.0345259 0.0773393	0.0559326
P17987	76	TCP1	TCP1_C76	#CELADLQDK	1	TCPA_HUMAN T-complex protein 1 subunit alpha OS=Homo sapiens OX=9606 GN=TCP1 PE=1 SV=1	0.228925	0.228925
Q9Y5L4	50	TIMM13	TIMM13_C50	#CIGKPGGSLDNSEQK	1	TIM13_HUMAN Mitochondrial import inner membrane translocase subunit Tim13 OS=Homo sapiens OX=9606 GN=TIMM13 PE=1 SV=1	0.0106144	0.0106144
O75663	87	TIPRL	TIPRL_C87	#CAEEWQESR	2	TIPRL_HUMAN TIP41-like protein OS=Homo sapiens OX=9606 GN=TIPRL PE=1 SV=2	0.133129 0.20299	0.16806
Q9Y490	1087	TLN1	TLN1_C1087	#CTQDLGNSTK	2	TLN1_HUMAN Talin-1 OS=Homo sapiens OX=9606 GN=TLN1 PE=1 SV=3	0.0726269 0.212213	0.14242
P04637	182	TP53	TP53_C182	#CSDSDGLAPPQHLIR	2	P53_HUMAN Cellular tumor antigen p53 OS=Homo sapiens OX=9606 GN=TP53 PE=1 SV=4	0.00416403 0.0181591	0.0111616
P04637	176	TP53	TP53_C176	#CPHHER	2	P53_HUMAN Cellular tumor antigen p53 OS=Homo sapiens OX=9606 GN=TP53 PE=1 SV=4	0.249362 0.349295	0.299328
Q12888	772	TP53BP1	TP53BP1_C772	#CEPLEGVEK	1	TP53B_HUMAN TP53-binding protein 1 OS=Homo sapiens OX=9606 GN=TP53BP1 PE=1 SV=2	0.103158	0.103158
P07951	190	TPM2	TPM2_C190	#CGDLEEELK	1	TPM2_HUMAN Tropomyosin beta chain OS=Homo sapiens OX=9606 GN=TPM2 PE=1 SV=1	0.187399	0.187399
P12270	224	TPR	TPR_C224	#CNLENKK	1	TPR_HUMAN Nucleoprotein TPR OS=Homo sapiens OX=9606 GN=TPR PE=1 SV=3	0.329241	0.329241
P13693	28	TPT1	TPT1_C28	#CLEVEGK	3	TCTP_HUMAN Translationally-controlled tumor protein OS=Homo sapiens OX=9606 GN=TPT1 PE=1 SV=1	0.0988926 0.130118 0.138189	0.130118
O14545	267	TRAFD1	TRAFD1_C267	#CEADQSHGGPR	1	TRAD1_HUMAN TRAF-type zinc finger domain-containing protein 1 OS=Homo sapiens OX=9606 GN=TRAFD1 PE=1 SV=1	0.0481292	0.0481292
P26368	464	U2AF2	U2AF2_C464	#CDPDSYHR	1	U2AF2_HUMAN Splicing factor U2AF 65 kDa subunit OS=Homo sapiens OX=9606 GN=U2AF2 PE=1 SV=4	0.338307	0.338307
O15042	65	U2SURP	U2SURP_C65	#CDSPHQNLSR	2	SR140_HUMAN U2 snRNP-associated SURP motif-containing protein OS=Homo sapiens OX=9606 GN=U2SURP PE=1 SV=2	0.0318176 0.0704426	0.0511301
P22314	1039	UBA1	UBA1_C1039	#CCNDESGEDVEVPYVR	2	UBA1_HUMAN Ubiquitin-like modifier-activating enzyme 1 OS=Homo sapiens OX=9606 GN=UBA1 PE=1 SV=3	0.00740395 0.198474	0.102939
P22314	1040	UBA1	UBA1_C1040	#CNDESGEDVEVPYVR	1	UBA1_HUMAN Ubiquitin-like modifier-activating enzyme 1 OS=Homo sapiens OX=9606 GN=UBA1 PE=1 SV=3	0.235897	0.235897
P62987	115	UBA52	UBA52_C115	#CGHTNNLRPK	1	RL40_HUMAN Ubiquitin-60S ribosomal protein L40 OS=Homo sapiens OX=9606 GN=UBA52 PE=1 SV=2	0.0729752	0.0729752
P63279	93	UBE2I	UBE2I_C93	#CLSILEEDK	2	UBC9_HUMAN SUMO-conjugating enzyme UBC9 OS=Homo sapiens OX=9606 GN=UBE2I PE=1 SV=1	0.283634 0.300174	0.291904
P09936	90	UCHL1	UCHL1_C90	#CGTIGLIHAVANNQDK	1	UCHL1_HUMAN Ubiquitin carboxyl-terminal hydrolase isozyme L1 OS=Homo sapiens OX=9606 GN=UCHL1 PE=1 SV=2	0.286364	0.286364
Q96T88	98	UHRF1	UHRF1_C98	#CLGQSESDK	1	UHRF1_HUMAN E3 ubiquitin-protein ligase UHRF1 OS=Homo sapiens OX=9606 GN=UHRF1 PE=1 SV=1	0.157286	0.157286
P55072	184	VCP	VCP_C184	#CEGEPIKR	1	TERA_HUMAN Transitional endoplasmic reticulum ATPase OS=Homo sapiens OX=9606 GN=VCP PE=1 SV=4	0.186861	0.186861
P45880	47	VDAC2	VDAC2_C47	#CSGVEFSTSGSSNTDTGK	7	VDAC2_HUMAN Voltage-dependent anion-selective channel protein 2 OS=Homo sapiens OX=9606 GN=VDAC2 PE=1 SV=2	0.000174085 0.0007698 0.000909178 0.000910533 0.000920916 0.000947837 0.048969	0.000910533
P45880	13	VDAC2	VDAC2_C13	#CIPPSYADLGK	9	VDAC2_HUMAN Voltage-dependent anion-selective channel protein 2 OS=Homo sapiens OX=9606 GN=VDAC2 PE=1 SV=2	0.00171907 0.00521245 0.0291593 0.0893937 0.137824 0.177834 0.177874 0.190584 0.333559	0.137824
P45880	76	VDAC2	VDAC2_C76	#CEYGLTFTEK	1	VDAC2_HUMAN Voltage-dependent anion-selective channel protein 2 OS=Homo sapiens OX=9606 GN=VDAC2 PE=1 SV=2	0.0556781	0.0556781
Q9Y277	2	VDAC3	VDAC3_C2	#CNTPTYCDLGK	5	VDAC3_HUMAN Voltage-dependent anion-selective channel protein 3 OS=Homo sapiens OX=9606 GN=VDAC3 PE=1 SV=1	0.0879842 0.107536 0.145805 0.216644 0.309241	0.145805
Q9Y277	36	VDAC3	VDAC3_C36	#CSGVEFSTSGH	1	VDAC3_HUMAN Voltage-dependent anion-selective channel protein 3 OS=Homo sapiens OX=9606 GN=VDAC3 PE=1 SV=1	0.275067	0.275067
P08670	328	VIM	VIM_C328	#CEVDALK	5	VIME_HUMAN Vimentin OS=Homo sapiens OX=9606 GN=VIM PE=1 SV=4	0.0981722 0.139733 0.140722 0.146709 0.147603	0.140722
Q99986	220	VRK1	VRK1_C220	#CHDGTIEFTSIDAHNGVAPSR	2	VRK1_HUMAN Serine/threonine-protein kinase VRK1 OS=Homo sapiens OX=9606 GN=VRK1 PE=1 SV=1	0.00338568 0.147631	0.0755083
Q7Z5K2	1170	WAPL	WAPL_C1170	#CAVGTTGQK	1	WAPL_HUMAN Wings apart-like protein homolog OS=Homo sapiens OX=9606 GN=WAPL PE=1 SV=1	0.293898	0.293898
Q5JSH3	140	WDR44	WDR44_C140	#CFPSDETCEKPVDETTK	3	WDR44_HUMAN WD repeat-containing protein 44 OS=Homo sapiens OX=9606 GN=WDR44 PE=1 SV=1	0.00669259 0.0209589 0.138241	0.0209589
P62258	98	YWHAE	YWHAE_C98	#CDILDVLDK	9	1433E_HUMAN 14-3-3 protein epsilon OS=Homo sapiens OX=9606 GN=YWHAE PE=1 SV=1	0.0165271 0.0270438 0.0339106 0.0377129 0.0647573 0.102114 0.110627 0.243665 0.277517	0.0647573
P62258	97	YWHAE	YWHAE_C97	#CCDILDVLDK	2	1433E_HUMAN 14-3-3 protein epsilon OS=Homo sapiens OX=9606 GN=YWHAE PE=1 SV=1	0.0347818 0.20357	0.119176
O75152	636	ZC3H11A	ZC3H11A_C636	#CAAQTLEK	3	ZC11A_HUMAN Zinc finger CCCH domain-containing protein 11A OS=Homo sapiens OX=9606 GN=ZC3H11A PE=1 SV=3	0.0991353 0.145855 0.189815	0.145855
