# Supplementary material for: Proteolysis-assisted cyclization facilitates site-centric target deconvolution of isothiocyanates
Source: Research Square preprint supplement (doi:10.21203/rs.3.rs-5055115/v1), 2025-10-08
Supplement: Supplementary file 7 [file d4c6bebe03b13484bec25529.xlsx]

## Sheet: 1
Site	Genename	Description	Modified sequences	Spectrum count	All ratio	All SD Ratio	Ratio average	Ratio SD	Total spectrum count	Repeat counts
P48444_479	ARCN1	COPD_HUMAN Coatomer subunit delta OS=Homo sapiens OX=9606 GN=ARCN1 PE=1 SV=1	||||C(ITC[C])NIQVTK|C(ITC[C])NIQVTK|C(ITC[C])NIQVTK|C(ITC[C])NIQVTK	||||1|1|1|1	||||9.78|7.11|7.45|12.78	||||NA|NA|NA|NA	9.28	2.61775	4	4
Q63HN8_1156	RNF213	RN213_HUMAN E3 ubiquitin-protein ligase RNF213 OS=Homo sapiens OX=9606 GN=RNF213 PE=1 SV=3	||C(ITC[C])VDSLLK|C(ITC[C])VDSLLK|C(ITC[C])VDSLLK||C(ITC[C])VDSLLK|	||1|1|2||1|	||2.22|1.49|3.66||3.09|	||NA|NA|0.14142||NA|	2.615	0.95556	5	4
O43593_487	HR	HAIR_HUMAN Lysine-specific demethylase hairless OS=Homo sapiens OX=9606 GN=HR PE=1 SV=5	C(ITC[C])LALPAK|C(ITC[C])LALPAK|C(ITC[C])LALPAK|C(ITC[C])LALPAK|C(ITC[C])LALPAK|C(ITC[C])LALPAK|C(ITC[C])LALPAK|C(ITC[C])LALPAK	1|2|2|2|3|3|1|3	1.17|1.21|2.095|2.175|2.87|2.86|3.4|3.31	NA|0.04243|0.03536|0.03536|0.12702|0.16462|NA|0.03786	2.38625	0.87274	17	8
P23396_119	RPS3	RS3_HUMAN 40S ribosomal protein S3 OS=Homo sapiens OX=9606 GN=RPS3 PE=1 SV=2	||C(ITC[C])YGVLR|C(ITC[C])YGVLR|AC(ITC[C])YGVLR|AC(ITC[C])YGVLR C(ITC[C])YGVLR|C(ITC[C])YGVLR|C(ITC[C])YGVLR	||2|2|1|3|1|2	||2.02|2.055|2.34|1.64|1.6|1.61	||0.18385|0.02121|NA|0.26558|NA|0.02828	1.8775	0.30682	11	6
Q96EP5_63	DAZAP1	DAZP1_HUMAN DAZ-associated protein 1 OS=Homo sapiens OX=9606 GN=DAZAP1 PE=1 SV=1	C(ITC[C])VGTVLASR||C(ITC[C])VGTVLASR|C(ITC[C])VGTVLASR||||	2||1|1||||	1.005||2.1|2.34||||	0.02121||NA|NA||||	1.815	0.71167	4	3
P08708_35	RPS17	RS17_HUMAN 40S ribosomal protein S17 OS=Homo sapiens OX=9606 GN=RPS17 PE=1 SV=2	C(ITC[C])EEIAIIPSKK C(ITC[C])EEIAIIPSK|C(ITC[C])EEIAIIPSKK C(ITC[C])EEIAIIPSK|C(ITC[C])EEIAIIPSK|C(ITC[C])EEIAIIPSK|C(ITC[C])EEIAIIPSK|C(ITC[C])EEIAIIPSK|C(ITC[C])EEIAIIPSK|C(ITC[C])EEIAIIPSK	4|6|7|4|4|2|3|5	0.845|0.905|2.06|2.295|1.405|1.495|1.87|1.69	0.14491|0.08406|0.71547|0.16391|0.01414|0.10607|0.03464|0.04669	1.57062	0.51697	35	8
P23396_134	RPS3	RS3_HUMAN 40S ribosomal protein S3 OS=Homo sapiens OX=9606 GN=RPS3 PE=1 SV=2	GC(ITC[C])EVVVSGK C(ITC[C])EVVVSGK|C(ITC[C])EVVVSGK|GC(ITC[C])EVVVSGK C(ITC[C])EVVVSGK|GC(ITC[C])EVVVSGK C(ITC[C])EVVVSGK|GC(ITC[C])EVVVSGK C(ITC[C])EVVVSGK|GC(ITC[C])EVVVSGK C(ITC[C])EVVVSGK|GC(ITC[C])EVVVSGK|GC(ITC[C])EVVVSGK	3|1|3|2|3|5|2|3	1.29|0.86|1.79|1.815|1.8|1.62|1.635|1.61	0.17214|NA|0.33808|0.3182|0.21362|0.1506|0.13435|0.05033	1.5525	0.32726	22	8
Q9H334_258	FOXP1	FOXP1_HUMAN Forkhead box protein P1 OS=Homo sapiens OX=9606 GN=FOXP1 PE=1 SV=1	||||C(ITC[C])VSSSAPSK|C(ITC[C])VSSSAPSK|C(ITC[C])VSSSAPSK|	||||1|1|2|	||||1.61|2.04|1.0|	||||NA|NA|0.22627|	1.55	0.52259	4	3
P46777_100	RPL5	RL5_HUMAN 60S ribosomal protein L5 OS=Homo sapiens OX=9606 GN=RPL5 PE=1 SV=3	C(ITC[C])TGLLLAR||C(ITC[C])TGLLLAR||C(ITC[C])TGLLLAR||C(ITC[C])TGLLLAR|C(ITC[C])TGLLLAR	1||1||2||1|1	1.76||0.92||1.295||1.86|1.9	NA||NA||0.07778||NA|NA	1.547	0.42561	6	5
P22570_105	FDXR	ADRO_HUMAN NADPH:adrenodoxin oxidoreductase, mitochondrial OS=Homo sapiens OX=9606 GN=FDXR PE=1 SV=3	C(ITC[C])AFWGNVEVGR|C(ITC[C])AFWGNVEVGR|||||C(ITC[C])AFWGNVEVGR|	1|1|||||1|	1.73|1.73|||||1.12|	NA|NA|||||NA|	1.52667	0.35218	3	3
P62249_25	RPS16	RS16_HUMAN 40S ribosomal protein S16 OS=Homo sapiens OX=9606 GN=RPS16 PE=1 SV=2	TATAVAHC(ITC[C])K|TATAVAHC(ITC[C])K|TATAVAHC(ITC[C])K|TATAVAHC(ITC[C])K|TATAVAHC(ITC[C])K|||	2|2|1|1|1|||	1.25|1.73|1.9|1.53|1.19|||	0.0|0.0|NA|NA|NA|||	1.52	0.3043	7	5
Q8NBJ7_290	SUMF2	SUMF2_HUMAN Inactive C-alpha-formylglycine-generating enzyme 2 OS=Homo sapiens OX=9606 GN=SUMF2 PE=1 SV=2	C(ITC[C])AADAGRPPGEL|C(ITC[C])AADAGRPPGEL|C(ITC[C])AADAGRPPGEL|C(ITC[C])AADAGRPPGEL||||	6|3|2|2||||	1.495|1.27|1.74|1.56||||	0.5877|0.86165|0.39598|0.15556||||	1.51625	0.19414	13	4
P63244_249	RACK1	RACK1_HUMAN Receptor of activated protein C kinase 1 OS=Homo sapiens OX=9606 GN=RACK1 PE=1 SV=3	C(ITC[C])AATGPSIK|C(ITC[C])AATGPSIK|C(ITC[C])AATGPSIK|C(ITC[C])AATGPSIK|C(ITC[C])AATGPSIK|C(ITC[C])AATGPSIK|C(ITC[C])AATGPSIK|C(ITC[C])AATGPSIK	4|2|2|3|3|3|5|2	2.38|1.645|1.0|1.17|1.53|1.5|1.25|1.425	0.94196|0.84146|0.0|0.02646|0.24331|0.04041|0.16622|0.17678	1.4875	0.41783	24	8
P08865_148	RPSA	RSSA_HUMAN 40S ribosomal protein SA OS=Homo sapiens OX=9606 GN=RPSA PE=1 SV=4	|C(ITC[C])NTDSPLR|C(ITC[C])NTDSPLR|C(ITC[C])NTDSPLR|C(ITC[C])NTDSPLR|C(ITC[C])NTDSPLR|C(ITC[C])NTDSPLR|C(ITC[C])NTDSPLR	|4|2|2|3|3|4|4	|1.57|1.49|1.53|1.39|1.39|1.47|1.465	|0.43677|0.0|0.09899|0.09238|0.13614|0.08732|0.41701	1.47214	0.06682	22	7
Q69YN4_1008	VIRMA	VIR_HUMAN Protein virilizer homolog OS=Homo sapiens OX=9606 GN=VIRMA PE=1 SV=2	C(ITC[C])TLTLLK|C(ITC[C])TLTLLK|||C(ITC[C])TLTLLK|||	1|1|||1|||	2.0|1.25|||1.15|||	NA|NA|||NA|||	1.46667	0.46458	3	3
P23396_97	RPS3	RS3_HUMAN 40S ribosomal protein S3 OS=Homo sapiens OX=9606 GN=RPS3 PE=1 SV=2	C(ITC[C])AIAQAESLR|C(ITC[C])AIAQAESLR|C(ITC[C])AIAQAESLR|C(ITC[C])AIAQAESLR|C(ITC[C])AIAQAESLR|C(ITC[C])AIAQAESLR|C(ITC[C])AIAQAESLR|C(ITC[C])AIAQAESLR	6|6|4|2|3|2|4|4	0.87|0.905|1.76|1.73|1.47|1.655|1.56|1.775	0.07607|0.0383|0.07439|0.14142|0.01|0.26163|0.03266|0.205	1.46563	0.37151	31	8
P61313_110	RPL15	RL15_HUMAN 60S ribosomal protein L15 OS=Homo sapiens OX=9606 GN=RPL15 PE=1 SV=2	HC(ITC[C])GALR||||HC(ITC[C])GALR|HC(ITC[C])GALR||HC(ITC[C])GALR	1||||1|2||1	1.77||||1.41|1.215||1.46	NA||||NA|0.13435||NA	1.46375	0.2299	5	4
P63220_17	RPS21	RS21_HUMAN 40S ribosomal protein S21 OS=Homo sapiens OX=9606 GN=RPS21 PE=1 SV=1	C(ITC[C])SASNR|C(ITC[C])SASNR|||C(ITC[C])SASNR||C(ITC[C])SASNR|C(ITC[C])SASNR	2|1|||1||1|1	1.18|1.19|||1.33||1.84|1.77	0.01414|NA|||NA||NA|NA	1.462	0.31964	6	5
Q9P0L0_128	VAPA	VAPA_HUMAN Vesicle-associated membrane protein-associated protein A OS=Homo sapiens OX=9606 GN=VAPA PE=1 SV=3	C(ITC[C])VFEMPNENDK||C(ITC[C])VFEMPNENDK|C(ITC[C])VFEMPNENDK||||	1||1|1||||	1.09||1.86|1.39||||	NA||NA|NA||||	1.44667	0.38812	3	3
P50579_290	METAP2	MAP2_HUMAN Methionine aminopeptidase 2 OS=Homo sapiens OX=9606 GN=METAP2 PE=1 SV=1	C(ITC[C])AGIDVR|C(ITC[C])AGIDVR|C(ITC[C])AGIDVR|C(ITC[C])AGIDVR|C(ITC[C])AGIDVR|C(ITC[C])AGIDVR||	3|3|3|3|1|1||	1.74|1.6|1.26|1.26|1.29|1.53||	0.35119|0.21362|0.19053|0.17898|NA|NA||	1.44667	0.2053	14	6
P25398_108	RPS12	RS12_HUMAN 40S ribosomal protein S12 OS=Homo sapiens OX=9606 GN=RPS12 PE=1 SV=3	VVGCSC(ITC[C])VVVK||VVGCSC(ITC[C])VVVK|||VVGCSC(ITC[C])VVVK||	1||1|||1||	1.38||1.51|||1.41||	NA||NA|||NA||	1.43333	0.06807	3	3
P46782_66	RPS5	RS5_HUMAN 40S ribosomal protein S5 OS=Homo sapiens OX=9606 GN=RPS5 PE=1 SV=4	C(ITC[C])PIVER||C(ITC[C])PIVER|C(ITC[C])PIVER|||C(ITC[C])PIVER|C(ITC[C])PIVER	1||1|2|||1|1	1.54||1.92|1.295|||0.63|1.77	NA||NA|1.01116|||NA|NA	1.431	0.50646	6	5
Q09161_503	NCBP1	NCBP1_HUMAN Nuclear cap-binding protein subunit 1 OS=Homo sapiens OX=9606 GN=NCBP1 PE=1 SV=1	||C(ITC[C])LAVAFK|C(ITC[C])LAVAFK|C(ITC[C])LAVAFK|C(ITC[C])LAVAFK|C(ITC[C])LAVAFK|C(ITC[C])LAVAFK	||1|3|1|1|2|1	||1.55|1.54|1.22|1.22|1.84|1.17	||NA|0.28885|NA|NA|0.0|NA	1.42333	0.26463	9	6
Q96SW2_205	CRBN	CRBN_HUMAN Protein cereblon OS=Homo sapiens OX=9606 GN=CRBN PE=1 SV=1	C(ITC[C])QIFPSKPVSR|C(ITC[C])QIFPSKPVSR|C(ITC[C])QIFPSKPVSR|C(ITC[C])QIFPSKPVSR||||	2|2|2|2||||	1.68|1.05|1.165|1.66||||	0.98995|0.29698|0.13435|0.67882||||	1.38875	0.32824	8	4
P32969_134	RPL9	RL9_HUMAN 60S ribosomal protein L9 OS=Homo sapiens OX=9606 GN=RPL9 PE=1 SV=1	C(ITC[C])SVSQAQK|C(ITC[C])SVSQAQK|C(ITC[C])SVSQAQK|C(ITC[C])SVSQAQK||C(ITC[C])SVSQAQK|C(ITC[C])SVSQAQK|C(ITC[C])SVSQAQK	1|1|2|1||1|2|1	1.43|1.26|1.38|1.61||1.27|1.4|1.34	NA|NA|0.0|NA||NA|0.0|NA	1.38429	0.11816	9	7
O15067_270	PFAS	PUR4_HUMAN Phosphoribosylformylglycinamidine synthase OS=Homo sapiens OX=9606 GN=PFAS PE=1 SV=4	||C(ITC[C])DNSSAIQGK||C(ITC[C])DNSSAIQGK|C(ITC[C])DNSSAIQGK||C(ITC[C])DNSSAIQGK	||3||1|2||1	||1.69||0.97|0.96||1.84	||0.05774||NA|0.0||NA	1.365	0.46594	7	4
Q8NFC6_2570	BOD1L1	BD1L1_HUMAN Biorientation of chromosomes in cell division protein 1-like 1 OS=Homo sapiens OX=9606 GN=BOD1L1 PE=1 SV=2	C(ITC[C])ITGQESK||C(ITC[C])ITGQESK|C(ITC[C])ITGQESK||||	1||1|2||||	1.17||1.47|1.455||||	NA||NA|0.12021||||	1.365	0.16904	4	3
P17812_176	CTPS1	PYRG1_HUMAN CTP synthase 1 OS=Homo sapiens OX=9606 GN=CTPS1 PE=1 SV=2	|C(ITC[C])NIHVSLVPQPSSTGEQK|C(ITC[C])NIHVSLVPQPSSTGEQK||||C(ITC[C])NIHVSLVPQPSSTGEQK|	|2|1||||1|	|1.39|0.95||||1.75|	|0.0|NA||||NA|	1.36333	0.40067	4	3
Q99829_366	CPNE1	CPNE1_HUMAN Copine-1 OS=Homo sapiens OX=9606 GN=CPNE1 PE=1 SV=1	C(ITC[C])AGIQGIVDAYR|||C(ITC[C])AGIQGIVDAYR|C(ITC[C])AGIQGIVDAYR||C(ITC[C])AGIQGIVDAYR|C(ITC[C])AGIQGIVDAYR	1|||1|1||2|2	1.52|||1.0|1.29||1.825|1.18	NA|||NA|NA||0.68589|0.86267	1.363	0.31964	7	5
Q13427_10	PPIG	PPIG_HUMAN Peptidyl-prolyl cis-trans isomerase G OS=Homo sapiens OX=9606 GN=PPIG PE=1 SV=2	C(ITC[C])FFDIAINNQPAGR|C(ITC[C])FFDIAINNQPAGR|||C(ITC[C])FFDIAINNQPAGR||C(ITC[C])FFDIAINNQPAGR|C(ITC[C])FFDIAINNQPAGR	3|3|||1||1|3	1.72|1.53|||0.95||1.78|0.8	0.21825|2.78948|||NA||NA|0.1106	1.356	0.45181	11	5
P27824_160	CANX	CALX_HUMAN Calnexin OS=Homo sapiens OX=9606 GN=CANX PE=1 SV=2	|||C(ITC[C])GGAYVK|C(ITC[C])GGAYVK|C(ITC[C])GGAYVK||C(ITC[C])GGAYVK	|||1|2|1||2	|||0.8|1.845|1.72||1.02	|||NA|0.24749|NA||0.0	1.34625	0.51422	6	4
Q02543_64	RPL18A	RL18A_HUMAN 60S ribosomal protein L18a OS=Homo sapiens OX=9606 GN=RPL18A PE=1 SV=2	C(ITC[C])GQVFEK|C(ITC[C])GQVFEK|C(ITC[C])GQVFEK|C(ITC[C])GQVFEK|C(ITC[C])GQVFEK|C(ITC[C])GQVFEK|C(ITC[C])GQVFEK|C(ITC[C])GQVFEK SSGEIVYC(ITC[C])GQVFEK	1|2|2|5|1|3|1|3	0.72|0.67|1.4|1.42|1.38|1.5|1.86|1.78	NA|0.01414|0.07071|0.11929|NA|0.11846|NA|0.13503	1.34125	0.43662	18	8
P17812_30	CTPS1	PYRG1_HUMAN CTP synthase 1 OS=Homo sapiens OX=9606 GN=CTPS1 PE=1 SV=2	|||C(ITC[C])GLHVTSIK|SC(ITC[C])GLHVTSIK|SC(ITC[C])GLHVTSIK|SC(ITC[C])GLHVTSIK|C(ITC[C])GLHVTSIK	|||3|1|1|2|1	|||1.32|1.08|1.91|1.41|0.98	|||2.3094|NA|NA|0.86267|NA	1.34	0.36311	8	5
P32969_74	RPL9	RL9_HUMAN 60S ribosomal protein L9 OS=Homo sapiens OX=9606 GN=RPL9 PE=1 SV=1	C(ITC[C])SHVQNMIK||C(ITC[C])SHVQNMIK|C(ITC[C])SHVQNMIK|||C(ITC[C])SHVQNMIK|C(ITC[C])SHVQNMIK	2||1|1|||2|1	0.82||1.73|1.58|||1.31|1.26	0.11314||NA|NA|||0.14142|NA	1.34	0.34907	7	5
Q9UL25_29	RAB21	RAB21_HUMAN Ras-related protein Rab-21 OS=Homo sapiens OX=9606 GN=RAB21 PE=1 SV=3	||VVLLGEGC(ITC[C])VGK|VVLLGEGC(ITC[C])VGK||VVLLGEGC(ITC[C])VGK|VVLLGEGC(ITC[C])VGK|	||2|2||1|1|	||1.525|1.43||1.48|0.89|	||0.13435|0.05657||NA|NA|	1.33125	0.29671	6	4
P49773_84	HINT1	HINT1_HUMAN Histidine triad nucleotide-binding protein 1 OS=Homo sapiens OX=9606 GN=HINT1 PE=1 SV=2	C(ITC[C])AADLGLNK|C(ITC[C])AADLGLNK|C(ITC[C])AADLGLNK|C(ITC[C])AADLGLNK|||C(ITC[C])AADLGLNK|	5|6|2|2|||1|	1.89|1.795|0.995|1.03|||0.94|	0.11589|0.14734|0.00707|0.02828|||NA|	1.33	0.47015	16	5
P49589_182	CARS1	SYCC_HUMAN Cysteine--tRNA ligase, cytoplasmic OS=Homo sapiens OX=9606 GN=CARS1 PE=1 SV=3	|||C(ITC[C])VEVLLEEAK|||C(ITC[C])VEVLLEEAK|C(ITC[C])VEVLLEEAK	|||1|||1|1	|||1.63|||1.26|1.09	|||NA|||NA|NA	1.32667	0.2761	3	3
P60953_6	CDC42	CDC42_HUMAN Cell division control protein 42 homolog OS=Homo sapiens OX=9606 GN=CDC42 PE=1 SV=2	C(ITC[C])VVVGDGAVGK|C(ITC[C])VVVGDGAVGK|||C(ITC[C])VVVGDGAVGK|C(ITC[C])VVVGDGAVGK||	9|6|||4|4||	1.75|1.675|||0.935|0.925||	0.23378|0.07808|||0.03873|0.00957||	1.32125	0.45283	23	4
P10768_56	ESD	ESTD_HUMAN S-formylglutathione hydrolase OS=Homo sapiens OX=9606 GN=ESD PE=1 SV=2	C(ITC[C])TEQNFISK|C(ITC[C])TEQNFISK||C(ITC[C])TEQNFISK|C(ITC[C])TEQNFISK|C(ITC[C])TEQNFISK|C(ITC[C])TEQNFISK|C(ITC[C])TEQNFISK	2|2||1|1|1|2|3	1.325|1.72||1.55|1.1|0.89|1.355|1.26	0.0495|0.0||NA|NA|NA|0.13435|0.24947	1.31429	0.27411	12	7
P19338_543	NCL	NUCL_HUMAN Nucleolin OS=Homo sapiens OX=9606 GN=NCL PE=1 SV=3	||EALNSC(ITC[C])NKR EALNSC(ITC[C])NK|||EALNSC(ITC[C])NKR|EALNSC(ITC[C])NKR|	||3|||1|1|	||1.67|||0.86|1.41|	||1.5473|||NA|NA|	1.31333	0.41356	5	3
P49368_372	CCT3	TCPG_HUMAN T-complex protein 1 subunit gamma OS=Homo sapiens OX=9606 GN=CCT3 PE=1 SV=4	||||AC(ITC[C])TILLR|AC(ITC[C])TILLR|AC(ITC[C])TILLR|	||||1|2|1|	||||1.54|1.46|0.94|	||||NA|0.0|NA|	1.31333	0.32578	4	3
P50991_221	CCT4	TCPD_HUMAN T-complex protein 1 subunit delta OS=Homo sapiens OX=9606 GN=CCT4 PE=1 SV=4	||C(ITC[C])ELVEGLVLTQK|C(ITC[C])ELVEGLVLTQK||C(ITC[C])ELVEGLVLTQK|C(ITC[C])ELVEGLVLTQK|	||1|1||1|2|	||1.53|1.42||0.98|1.315|	||NA|NA||NA|0.24749|	1.31125	0.23764	5	4
P38606_394	ATP6V1A	VATA_HUMAN V-type proton ATPase catalytic subunit A OS=Homo sapiens OX=9606 GN=ATP6V1A PE=1 SV=2	C(ITC[C])LGNPER|C(ITC[C])LGNPER|C(ITC[C])LGNPER|C(ITC[C])LGNPER||||	1|1|2|2||||	1.55|1.75|0.955|0.98||||	NA|NA|0.06364|0.04243||||	1.30875	0.40254	6	4
Q9NVI1_1158	FANCI	FANCI_HUMAN Fanconi anemia group I protein OS=Homo sapiens OX=9606 GN=FANCI PE=1 SV=4	|C(ITC[C])VDTILK|C(ITC[C])VDTILK|C(ITC[C])VDTILK|C(ITC[C])VDTILK|C(ITC[C])VDTILK|C(ITC[C])VDTILK|C(ITC[C])VDTILK	|1|1|3|1|1|4|2	|1.76|1.03|0.84|1.36|1.6|1.415|1.15	|NA|NA|0.0|NA|NA|0.3788|0.21213	1.30786	0.32275	13	7
P46777_144	RPL5	RL5_HUMAN 60S ribosomal protein L5 OS=Homo sapiens OX=9606 GN=RPL5 PE=1 SV=3	||C(ITC[C])YLDAGLAR|C(ITC[C])YLDAGLAR|C(ITC[C])YLDAGLAR|C(ITC[C])YLDAGLAR|C(ITC[C])YLDAGLAR|	||3|2|2|2|1|	||1.22|1.355|1.375|1.47|1.11|	||0.04041|0.41719|0.07778|0.0|NA|	1.306	0.14131	10	5
P62913_25	RPL11	RL11_HUMAN 60S ribosomal protein L11 OS=Homo sapiens OX=9606 GN=RPL11 PE=1 SV=2	LCLNIC(ITC[C])VGESGDR|KLCLNIC(ITC[C])VGESGDR LCLNIC(ITC[C])VGESGDR|KLCLNIC(ITC[C])VGESGDR LCLNIC(ITC[C])VGESGDR|LCLNIC(ITC[C])VGESGDR||LCLNIC(ITC[C])VGESGDR|LCLNIC(ITC[C])VGESGDR|	1|3|4|3||1|1|	0.68|0.95|1.46|1.8||1.07|1.87|	NA|0.21385|0.27427|0.09504||NA|NA|	1.305	0.48169	13	6
P05388_119	RPLP0	RLA0_HUMAN 60S acidic ribosomal protein P0 OS=Homo sapiens OX=9606 GN=RPLP0 PE=1 SV=1	C(ITC[C])EVTVPAQNTGLGPEK|C(ITC[C])EVTVPAQNTGLGPEK|C(ITC[C])EVTVPAQNTGLGPEK||C(ITC[C])EVTVPAQNTGLGPEK|C(ITC[C])EVTVPAQNTGLGPEK|C(ITC[C])EVTVPAQNTGLGPEK|C(ITC[C])EVTVPAQNTGLGPEK	1|4|2||2|2|1|2	1.0|0.91|1.385||1.185|1.37|1.47|1.79	NA|0.06683|0.14849||0.12021|0.16971|NA|0.0	1.30143	0.29901	14	7
P18754_198	RCC1	RCC1_HUMAN Regulator of chromosome condensation OS=Homo sapiens OX=9606 GN=RCC1 PE=1 SV=1	|||C(ITC[C])GEQGQLGR|C(ITC[C])GEQGQLGR|||C(ITC[C])GEQGQLGR	|||1|1|||2	|||1.56|1.1|||1.24	|||NA|NA|||0.04243	1.3	0.2358	4	3
P55072_174	VCP	TERA_HUMAN Transitional endoplasmic reticulum ATPase OS=Homo sapiens OX=9606 GN=VCP PE=1 SV=4	C(ITC[C])IVAPDTVIHCEGEPIKR||C(ITC[C])IVAPDTVIHCEGEPIK|C(ITC[C])IVAPDTVIHCEGEPIKR|C(ITC[C])IVAPDTVIHCEGEPIK|C(ITC[C])IVAPDTVIHCEGEPIK|C(ITC[C])IVAPDTVIHCEGEPIK|	1||2|2|1|1|1|	2.21||0.69|1.22|1.17|1.41|1.09|	NA||0.0|0.0|NA|NA|NA|	1.29833	0.5059	8	6
Q9Y3B2_15	EXOSC1	EXOS1_HUMAN Exosome complex component CSL4 OS=Homo sapiens OX=9606 GN=EXOSC1 PE=1 SV=1	|C(ITC[C])NLEEGSPGSGTYTR|C(ITC[C])NLEEGSPGSGTYTR||C(ITC[C])NLEEGSPGSGTYTR|||	|2|2||2|||	|1.74|1.09||1.06|||	|0.0|0.0||0.0|||	1.29667	0.38423	6	3
Q6P1L8_57	MRPL14	RM14_HUMAN 39S ribosomal protein L14, mitochondrial OS=Homo sapiens OX=9606 GN=MRPL14 PE=1 SV=1	C(ITC[C])IHVYK|C(ITC[C])IHVYK|C(ITC[C])IHVYK||||C(ITC[C])IHVYK|C(ITC[C])IHVYK	1|2|1||||1|1	1.79|1.62|0.92||||1.09|1.06	NA|0.19799|NA||||NA|NA	1.296	0.38358	6	5
Q07020_134	RPL18	RL18_HUMAN 60S ribosomal protein L18 OS=Homo sapiens OX=9606 GN=RPL18 PE=1 SV=2	GC(ITC[C])GTVLLSGPR C(ITC[C])GTVLLSGPR|GC(ITC[C])GTVLLSGPR C(ITC[C])GTVLLSGPR|GC(ITC[C])GTVLLSGPR C(ITC[C])GTVLLSGPR|GC(ITC[C])GTVLLSGPR C(ITC[C])GTVLLSGPR|GC(ITC[C])GTVLLSGPR|GC(ITC[C])GTVLLSGPR C(ITC[C])GTVLLSGPR|GC(ITC[C])GTVLLSGPR C(ITC[C])GTVLLSGPR|GC(ITC[C])GTVLLSGPR C(ITC[C])GTVLLSGPR	10|10|7|8|2|5|5|7	1.14|1.02|1.26|1.4|1.18|1.45|1.43|1.47	0.24043|0.11306|0.13687|0.35764|0.76368|0.34158|0.27959|0.24581	1.29375	0.16818	54	8
Q6ZW49_900	PAXIP1	PAXI1_HUMAN PAX-interacting protein 1 OS=Homo sapiens OX=9606 GN=PAXIP1 PE=1 SV=2	||C(ITC[C])THLIASK||||C(ITC[C])THLIASK|C(ITC[C])THLIASK	||1||||1|1	||0.96||||1.84|1.07	||NA||||NA|NA	1.29	0.47948	3	3
Q86VP6_802	CAND1	CAND1_HUMAN Cullin-associated NEDD8-dissociated protein 1 OS=Homo sapiens OX=9606 GN=CAND1 PE=1 SV=2	C(ITC[C])VAALTR|C(ITC[C])VAALTR|||C(ITC[C])VAALTR||C(ITC[C])VAALTR|C(ITC[C])VAALTR	2|1|||1||1|1	1.955|1.55|||0.93||0.97|1.04	0.45962|NA|||NA||NA|NA	1.289	0.44842	6	5
P78406_68	RAE1	RAE1L_HUMAN mRNA export factor OS=Homo sapiens OX=9606 GN=RAE1 PE=1 SV=1	C(ITC[C])WEVQDSGQTIPK|C(ITC[C])WEVQDSGQTIPK|C(ITC[C])WEVQDSGQTIPK|C(ITC[C])WEVQDSGQTIPK|C(ITC[C])WEVQDSGQTIPK||C(ITC[C])WEVQDSGQTIPK|	2|2|2|5|1||1|	1.23|1.355|1.09|1.19|1.39||1.47|	0.43841|0.06364|0.0|0.15057|NA||NA|	1.2875	0.14155	13	6
P56192_12	MARS1	SYMC_HUMAN Methionine--tRNA ligase, cytoplasmic OS=Homo sapiens OX=9606 GN=MARS1 PE=1 SV=2	C(ITC[C])LPVLAAAGR|C(ITC[C])LPVLAAAGR|||C(ITC[C])LPVLAAAGR|||	1|1|||1|||	1.43|1.58|||0.85|||	NA|NA|||NA|||	1.28667	0.38553	3	3
P78316_580	NOP14	NOP14_HUMAN Nucleolar protein 14 OS=Homo sapiens OX=9606 GN=NOP14 PE=1 SV=3	C(ITC[C])PILSLQDVVK|C(ITC[C])PILSLQDVVK|C(ITC[C])PILSLQDVVK|C(ITC[C])PILSLQDVVK|C(ITC[C])PILSLQDVVK|C(ITC[C])PILSLQDVVK|C(ITC[C])PILSLQDVVK|C(ITC[C])PILSLQDVVK	3|1|2|1|2|4|3|4	2.04|1.76|0.95|1.03|1.035|1.03|1.14|1.305	0.27006|NA|0.07071|NA|0.03536|0.0263|0.0|0.19339	1.28625	0.40033	20	8
O75116_804	ROCK2	ROCK2_HUMAN Rho-associated protein kinase 2 OS=Homo sapiens OX=9606 GN=ROCK2 PE=1 SV=4	||C(ITC[C])LTQNDLK|C(ITC[C])LTQNDLK||C(ITC[C])LTQNDLK||	||2|1||1||	||1.1|1.7||1.04||	||0.02828|NA||NA||	1.28	0.36497	4	3
P40429_38	RPL13A	RL13A_HUMAN 60S ribosomal protein L13a OS=Homo sapiens OX=9606 GN=RPL13A PE=1 SV=2	C(ITC[C])EGINISGNFYR|C(ITC[C])EGINISGNFYR|C(ITC[C])EGINISGNFYR|C(ITC[C])EGINISGNFYR|C(ITC[C])EGINISGNFYR|C(ITC[C])EGINISGNFYR|C(ITC[C])EGINISGNFYR|C(ITC[C])EGINISGNFYR	3|3|3|5|3|2|3|5	1.06|1.05|1.07|1.11|1.23|1.38|1.79|1.55	1.07686|0.03606|1.96299|0.06656|0.04041|0.0|0.06351|0.02683	1.28	0.2725	27	8
P62633_119	CNBP	CNBP_HUMAN Cellular nucleic acid-binding protein OS=Homo sapiens OX=9606 GN=CNBP PE=1 SV=1	C(ITC[C])YSCGEFGHIQK|C(ITC[C])YSCGEFGHIQK|C(ITC[C])YSCGEFGHIQK|C(ITC[C])YSCGEFGHIQK|||C(ITC[C])YSCGEFGHIQK|	2|2|4|4|||2|	1.595|1.78|1.085|1.025|||0.91|	0.34648|0.39598|0.06351|0.09674|||0.0|	1.279	0.38379	14	5
Q99707_467	MTR	METH_HUMAN Methionine synthase OS=Homo sapiens OX=9606 GN=MTR PE=1 SV=2	||C(ITC[C])IVNSISLK|C(ITC[C])IVNSISLK|C(ITC[C])IVNSISLK|||C(ITC[C])IVNSISLK	||1|1|1|||1	||0.87|1.0|1.87|||1.37	||NA|NA|NA|||NA	1.2775	0.44821	4	4
P15880_229	RPS2	RS2_HUMAN 40S ribosomal protein S2 OS=Homo sapiens OX=9606 GN=RPS2 PE=1 SV=2	GC(ITC[C])TATLGNFAK C(ITC[C])TATLGNFAK|GC(ITC[C])TATLGNFAK C(ITC[C])TATLGNFAK|GC(ITC[C])TATLGNFAK C(ITC[C])TATLGNFAK|GC(ITC[C])TATLGNFAK C(ITC[C])TATLGNFAK|GC(ITC[C])TATLGNFAK C(ITC[C])TATLGNFAK|GC(ITC[C])TATLGNFAK C(ITC[C])TATLGNFAK|GC(ITC[C])TATLGNFAK C(ITC[C])TATLGNFAK|GC(ITC[C])TATLGNFAK C(ITC[C])TATLGNFAK	8|12|5|8|9|5|7|9	0.96|0.885|1.43|1.45|1.37|1.44|1.36|1.31	0.09117|0.09771|0.01871|0.28739|0.06423|0.17117|0.07128|0.03606	1.27563	0.22382	63	8
Q9H0R6_203	QRSL1	GATA_HUMAN Glutamyl-tRNA(Gln) amidotransferase subunit A, mitochondrial OS=Homo sapiens OX=9606 GN=QRSL1 PE=1 SV=2	||||C(ITC[C])GLVGFK|C(ITC[C])GLVGFK||C(ITC[C])GLVGFK	||||2|1||1	||||1.18|1.42||1.22	||||0.45255|NA||NA	1.27333	0.12858	4	3
Q9UQ80_179	PA2G4	PA2G4_HUMAN Proliferation-associated protein 2G4 OS=Homo sapiens OX=9606 GN=PA2G4 PE=1 SV=3	C(ITC[C])TPIEGMLSHQLK|C(ITC[C])TPIEGMLSHQLK|C(ITC[C])TPIEGMLSHQLK|C(ITC[C])TPIEGMLSHQLK|||C(ITC[C])TPIEGMLSHQLK|C(ITC[C])TPIEGMLSHQLK	1|3|5|4|||1|1	1.3|0.98|1.35|1.18|||1.25|1.49	NA|0.03606|1.20596|0.15903|||NA|NA	1.25833	0.17175	15	6
P42356_1761	PI4KA	PI4KA_HUMAN Phosphatidylinositol 4-kinase alpha OS=Homo sapiens OX=9606 GN=PI4KA PE=1 SV=4	|||C(ITC[C])LSALSEVK|C(ITC[C])LSALSEVK||C(ITC[C])LSALSEVK|	|||1|1||1|	|||1.23|1.58||0.96|	|||NA|NA||NA|	1.25667	0.31086	3	3
P09960_26	LTA4H	LKHA4_HUMAN Leukotriene A-4 hydrolase OS=Homo sapiens OX=9606 GN=LTA4H PE=1 SV=2	C(ITC[C])SVDFTR|C(ITC[C])SVDFTR|C(ITC[C])SVDFTR|C(ITC[C])SVDFTR||||C(ITC[C])SVDFTR	3|2|1|3||||1	1.89|1.445|0.86|0.87||||1.18	0.07211|0.37477|NA|0.08||||NA	1.249	0.43273	10	5
Q9NSE4_155	IARS2	SYIM_HUMAN Isoleucine--tRNA ligase, mitochondrial OS=Homo sapiens OX=9606 GN=IARS2 PE=1 SV=2	C(ITC[C])HGLPIEIK|C(ITC[C])HGLPIEIK|C(ITC[C])HGLPIEIK|C(ITC[C])HGLPIEIK|C(ITC[C])HGLPIEIK|C(ITC[C])HGLPIEIK|C(ITC[C])HGLPIEIK|C(ITC[C])HGLPIEIK	1|3|4|4|3|4|4|3	1.35|1.05|1.4|1.45|1.16|1.195|1.245|1.13	NA|0.56471|0.12816|0.06994|0.03|0.56433|0.22196|0.13796	1.2475	0.14041	26	8
P61247_96	RPS3A	RS3A_HUMAN 40S ribosomal protein S3a OS=Homo sapiens OX=9606 GN=RPS3A PE=1 SV=2	C(ITC[C])LTNFHGMDLTR|C(ITC[C])LTNFHGMDLTR|C(ITC[C])LTNFHGMDLTR|C(ITC[C])LTNFHGMDLTR|C(ITC[C])LTNFHGMDLTR|C(ITC[C])LTNFHGMDLTR|C(ITC[C])LTNFHGMDLTR|C(ITC[C])LTNFHGMDLTR	6|3|6|7|5|6|10|4	1.08|1.03|1.345|1.23|1.42|1.25|1.355|1.27	0.22385|0.03055|0.16339|0.15747|0.11393|0.16437|0.17536|0.08718	1.2475	0.1347	47	8
Q96T88_512	UHRF1	UHRF1_HUMAN E3 ubiquitin-protein ligase UHRF1 OS=Homo sapiens OX=9606 GN=UHRF1 PE=1 SV=1	C(ITC[C])FAPINDQEGAEAK|C(ITC[C])FAPINDQEGAEAK|C(ITC[C])FAPINDQEGAEAK|C(ITC[C])FAPINDQEGAEAK|C(ITC[C])FAPINDQEGAEAK|C(ITC[C])FAPINDQEGAEAK|C(ITC[C])FAPINDQEGAEAK|	1|2|2|2|5|1|2|	1.86|1.925|1.02|0.91|0.94|0.98|1.095|	NA|0.10607|0.0|0.01414|0.0638|NA|0.14849|	1.24714	0.4452	15	7
P46776_70	RPL27A	RL27A_HUMAN 60S ribosomal protein L27a OS=Homo sapiens OX=9606 GN=RPL27A PE=1 SV=2	C(ITC[C])PTVNLDK|C(ITC[C])PTVNLDK|C(ITC[C])PTVNLDK|C(ITC[C])PTVNLDK|C(ITC[C])PTVNLDK|C(ITC[C])PTVNLDK|C(ITC[C])PTVNLDK|C(ITC[C])PTVNLDK	4|6|6|3|7|5|4|4	1.065|1.18|1.33|1.37|1.29|1.2|1.255|1.275	0.03862|0.03286|0.02066|0.08386|0.16688|0.03493|0.13736|0.14248	1.24563	0.09601	39	8
P0DPB5_37	POLR1D	RPC22_HUMAN Protein POLR1D, isoform 2 OS=Homo sapiens OX=9606 GN=POLR1D PE=1 SV=1	C(ITC[C])PLASTNK|C(ITC[C])PLASTNK||C(ITC[C])PLASTNK||||C(ITC[C])PLASTNK	1|2||1||||1	1.07|1.135||1.65||||1.12	NA|0.16263||NA||||NA	1.24375	0.27226	5	4
Q86TU7_36	SETD3	SETD3_HUMAN Actin-histidine N-methyltransferase OS=Homo sapiens OX=9606 GN=SETD3 PE=1 SV=1	C(ITC[C])SSPAPGPGK|C(ITC[C])SSPAPGPGK|C(ITC[C])SSPAPGPGK|C(ITC[C])SSPAPGPGK|C(ITC[C])SSPAPGPGK|C(ITC[C])SSPAPGPGK|C(ITC[C])SSPAPGPGK|C(ITC[C])SSPAPGPGK	5|5|3|2|1|2|3|1	0.96|0.95|1.57|1.255|1.45|1.03|1.27|1.46	0.05891|0.02302|0.20207|0.3182|NA|0.0|0.02887|NA	1.24313	0.24173	22	8
Q15149_3336	PLEC	PLEC_HUMAN Plectin OS=Homo sapiens OX=9606 GN=PLEC PE=1 SV=3	C(ITC[C])RPDQLTGLSLLPLSEK|C(ITC[C])RPDQLTGLSLLPLSEK|C(ITC[C])RPDQLTGLSLLPLSEK|C(ITC[C])RPDQLTGLSLLPLSEK||||	3|2|1|3||||	1.08|0.805|1.8|1.28||||	0.05196|0.02121|NA|0.02887||||	1.24125	0.42032	9	4
Q9UQ35_1509	SRRM2	SRRM2_HUMAN Serine/arginine repetitive matrix protein 2 OS=Homo sapiens OX=9606 GN=SRRM2 PE=1 SV=2	C(ITC[C])LTPQR|C(ITC[C])LTPQR|C(ITC[C])LTPQR|||C(ITC[C])LTPQR||C(ITC[C])LTPQR	1|4|3|||1||1	1.62|1.465|1.1|||1.01||1.0	NA|0.06185|0.10504|||NA||NA	1.239	0.2851	10	5
O95905_267	ECD	ECD_HUMAN Protein ecdysoneless homolog OS=Homo sapiens OX=9606 GN=ECD PE=1 SV=1	C(ITC[C])LYAQLVQQR|C(ITC[C])LYAQLVQQR|C(ITC[C])LYAQLVQQR|C(ITC[C])LYAQLVQQR|C(ITC[C])LYAQLVQQR|C(ITC[C])LYAQLVQQR|C(ITC[C])LYAQLVQQR|	2|3|2|3|2|1|1|	0.94|1.03|1.115|1.02|1.425|1.05|2.08|	0.09899|0.16743|0.16263|0.01155|0.09192|NA|NA|	1.23714	0.4029	14	7
Q13613_12	MTMR1	MTMR1_HUMAN Myotubularin-related protein 1 OS=Homo sapiens OX=9606 GN=MTMR1 PE=1 SV=4	||C(ITC[C])EGGGGPNPGPAGGR|C(ITC[C])EGGGGPNPGPAGGR|||C(ITC[C])EGGGGPNPGPAGGR|	||1|1|||2|	||0.97|1.76|||0.98|	||NA|NA|||0.0|	1.23667	0.45325	4	3
P60660_2	MYL6	MYL6_HUMAN Myosin light polypeptide 6 OS=Homo sapiens OX=9606 GN=MYL6 PE=1 SV=2	C(ITC[C])DFTEDQTAEFK|C(ITC[C])DFTEDQTAEFK|C(ITC[C])DFTEDQTAEFK|C(ITC[C])DFTEDQTAEFK|C(ITC[C])DFTEDQTAEFK|||	1|1|1|2|1|||	1.11|0.75|1.57|1.41|1.31|||	NA|NA|NA|0.01414|NA|||	1.23	0.31591	6	5
Q13823_336	GNL2	NOG2_HUMAN Nucleolar GTP-binding protein 2 OS=Homo sapiens OX=9606 GN=GNL2 PE=1 SV=1	|C(ITC[C])NVAPIAGETK|C(ITC[C])NVAPIAGETK|C(ITC[C])NVAPIAGETK|C(ITC[C])NVAPIAGETK|C(ITC[C])NVAPIAGETK|C(ITC[C])NVAPIAGETK|	|2|2|2|3|2|2|	|1.025|1.01|1.265|1.29|1.07|1.72|	|0.00707|0.02828|0.14849|0.02517|0.0|0.0|	1.23	0.26868	13	6
A6NDU8_179	C5orf51	CE051_HUMAN UPF0600 protein C5orf51 OS=Homo sapiens OX=9606 GN=C5orf51 PE=1 SV=1	C(ITC[C])PIQLNEGVSFQDLDTAK|C(ITC[C])PIQLNEGVSFQDLDTAK||C(ITC[C])PIQLNEGVSFQDLDTAK||||C(ITC[C])PIQLNEGVSFQDLDTAK	6|2||1||||1	1.12|1.71||1.11||||0.97	0.26028|0.04243||NA||||NA	1.2275	0.32887	10	4
Q9UFG5_87	C19orf25	CS025_HUMAN UPF0449 protein C19orf25 OS=Homo sapiens OX=9606 GN=C19orf25 PE=1 SV=2	|C(ITC[C])ELLQR|C(ITC[C])ELLQR|||||C(ITC[C])ELLQR	|2|2|||||1	|0.795|1.54|||||1.34	|0.0495|0.09899|||||NA	1.225	0.38558	5	3
P49721_163	PSMB2	PSB2_HUMAN Proteasome subunit beta type-2 OS=Homo sapiens OX=9606 GN=PSMB2 PE=1 SV=1	|C(ITC[C])LEELQK|C(ITC[C])LEELQK|C(ITC[C])LEELQK|||C(ITC[C])LEELQK|	|2|4|5|||1|	|1.655|1.03|1.07|||1.14|	|1.09602|0.25364|0.06107|||NA|	1.22375	0.29107	12	4
Q9Y490_1199	TLN1	TLN1_HUMAN Talin-1 OS=Homo sapiens OX=9606 GN=TLN1 PE=1 SV=3	C(ITC[C])VSCLPGQR|C(ITC[C])VSCLPGQR|C(ITC[C])VSCLPGQR|C(ITC[C])VSCLPGQR||||	2|1|1|2||||	1.375|1.55|1.17|0.785||||	0.13435|NA|NA|0.10607||||	1.22	0.32896	6	4
Q92922_462	SMARCC1	SMRC1_HUMAN SWI/SNF complex subunit SMARCC1 OS=Homo sapiens OX=9606 GN=SMARCC1 PE=1 SV=3	C(ITC[C])IHVIER||C(ITC[C])IHVIER|C(ITC[C])IHVIER|C(ITC[C])IHVIER|C(ITC[C])IHVIER|C(ITC[C])IHVIER|C(ITC[C])IHVIER	1||1|1|1|1|1|3	1.54||1.26|1.34|1.13|1.33|1.0|0.92	NA||NA|NA|NA|NA|NA|0.03464	1.21714	0.21484	9	7
Q9NP81_425	SARS2	SYSM_HUMAN Serine--tRNA ligase, mitochondrial OS=Homo sapiens OX=9606 GN=SARS2 PE=1 SV=1	||C(ITC[C])TDFQSR||C(ITC[C])TDFQSR||C(ITC[C])TDFQSR|	||1||1||1|	||1.2||0.87||1.58|	||NA||NA||NA|	1.21667	0.35529	3	3
Q9BXP5_640	SRRT	SRRT_HUMAN Serrate RNA effector molecule homolog OS=Homo sapiens OX=9606 GN=SRRT PE=1 SV=1	C(ITC[C])GIIHVR|C(ITC[C])GIIHVR|C(ITC[C])GIIHVR|C(ITC[C])GIIHVR|C(ITC[C])GIIHVR|C(ITC[C])GIIHVR|C(ITC[C])GIIHVR|C(ITC[C])GIIHVR	4|1|2|2|1|3|2|5	0.78|0.91|1.825|1.745|0.98|0.95|1.05|1.49	0.06185|NA|0.0495|0.30406|NA|0.14177|0.15556|0.07362	1.21625	0.4077	20	8
P62753_12	RPS6	RS6_HUMAN 40S ribosomal protein S6 OS=Homo sapiens OX=9606 GN=RPS6 PE=1 SV=1	LNISFPATGC(ITC[C])QK|||LNISFPATGC(ITC[C])QK|||LNISFPATGC(ITC[C])QK|	1|||2|||3|	1.01|||1.555|||1.07|	NA|||0.03536|||0.03055|	1.21167	0.29884	6	3
P62280_60	RPS11	RS11_HUMAN 40S ribosomal protein S11 OS=Homo sapiens OX=9606 GN=RPS11 PE=1 SV=3	C(ITC[C])PFTGNVSIR|C(ITC[C])PFTGNVSIR|C(ITC[C])PFTGNVSIR|C(ITC[C])PFTGNVSIR|C(ITC[C])PFTGNVSIR|C(ITC[C])PFTGNVSIR|C(ITC[C])PFTGNVSIR|C(ITC[C])PFTGNVSIR	5|6|5|4|4|3|1|3	1.06|1.05|1.2|1.13|1.25|1.29|1.35|1.36	0.06427|0.0371|0.07701|0.02708|0.06702|0.01155|NA|0.12342	1.21125	0.12229	31	8
P62910_96	RPL32	RL32_HUMAN 60S ribosomal protein L32 OS=Homo sapiens OX=9606 GN=RPL32 PE=1 SV=2	C(ITC[C])AEIAHNVSSK|C(ITC[C])AEIAHNVSSK|C(ITC[C])AEIAHNVSSK|C(ITC[C])AEIAHNVSSK|C(ITC[C])AEIAHNVSSK|C(ITC[C])AEIAHNVSSK|C(ITC[C])AEIAHNVSSK|C(ITC[C])AEIAHNVSSK	5|4|5|2|5|4|3|4	1.42|1.625|0.9|0.935|1.21|1.245|1.15|1.165	0.27179|1.53485|0.08468|0.00707|0.17972|0.04349|0.14572|0.09912	1.20625	0.23748	32	8
P05388_27	RPLP0	RLA0_HUMAN 60S acidic ribosomal protein P0 OS=Homo sapiens OX=9606 GN=RPLP0 PE=1 SV=1	C(ITC[C])FIVGADNVGSK|C(ITC[C])FIVGADNVGSK|C(ITC[C])FIVGADNVGSK|C(ITC[C])FIVGADNVGSK|C(ITC[C])FIVGADNVGSK|C(ITC[C])FIVGADNVGSK|C(ITC[C])FIVGADNVGSK|C(ITC[C])FIVGADNVGSK	8|8|8|9|10|6|11|10	1.535|1.48|0.92|0.9|1.285|1.285|1.12|1.12	0.1432|0.11276|0.15618|0.14509|0.04993|0.19799|0.10169|0.10806	1.20562	0.23483	70	8
P46782_172	RPS5	RS5_HUMAN 40S ribosomal protein S5 OS=Homo sapiens OX=9606 GN=RPS5 PE=1 SV=4	C(ITC[C])LADELINAAK|C(ITC[C])LADELINAAK||C(ITC[C])LADELINAAK|C(ITC[C])LADELINAAK|C(ITC[C])LADELINAAK|C(ITC[C])LADELINAAK|C(ITC[C])LADELINAAK	2|1||1|4|5|3|3	1.005|0.95||1.51|1.075|1.11|1.48|1.29	0.00707|NA||NA|0.20123|0.0295|0.28184|0.0866	1.20286	0.22612	19	7
Q9NSD9_548	FARSB	SYFB_HUMAN Phenylalanine--tRNA ligase beta subunit OS=Homo sapiens OX=9606 GN=FARSB PE=1 SV=3	C(ITC[C])AEIFAR|C(ITC[C])AEIFAR|C(ITC[C])AEIFAR|C(ITC[C])AEIFAR|C(ITC[C])AEIFAR|C(ITC[C])AEIFAR|C(ITC[C])AEIFAR|C(ITC[C])AEIFAR	2|3|4|4|2|2|4|3	1.625|1.37|0.965|0.82|1.23|1.34|1.21|1.05	0.07778|0.42736|0.12124|0.22172|0.39598|0.0|0.18475|0.18824	1.20125	0.25418	24	8
P07814_1487	EPRS1	SYEP_HUMAN Bifunctional glutamate/proline--tRNA ligase OS=Homo sapiens OX=9606 GN=EPRS1 PE=1 SV=5	C(ITC[C])ELQPGAK|C(ITC[C])ELQPGAK|C(ITC[C])ELQPGAK|C(ITC[C])ELQPGAK|C(ITC[C])ELQPGAK|C(ITC[C])ELQPGAK|C(ITC[C])ELQPGAK|C(ITC[C])ELQPGAK	1|1|1|2|2|4|2|2	1.39|1.04|1.12|1.15|0.995|1.1|1.39|1.425	NA|NA|NA|0.08485|0.00707|0.05679|0.0|0.02121	1.20125	0.17293	15	8
Q9BYC9_93	MRPL20	RM20_HUMAN 39S ribosomal protein L20, mitochondrial OS=Homo sapiens OX=9606 GN=MRPL20 PE=1 SV=1	C(ITC[C])QVELNR|C(ITC[C])QVELNR|C(ITC[C])QVELNR|C(ITC[C])QVELNR|C(ITC[C])QVELNR|C(ITC[C])QVELNR|C(ITC[C])QVELNR|C(ITC[C])QVELNR	1|1|4|2|3|2|1|2	0.57|0.87|1.79|1.575|1.35|1.14|1.22|1.09	NA|NA|0.05|0.09192|0.02309|0.04243|NA|0.57983	1.20062	0.38417	16	8
Q2TAP0_33	GOLGA7B	GOG7B_HUMAN Golgin subfamily A member 7B OS=Homo sapiens OX=9606 GN=GOLGA7B PE=1 SV=2	C(ITC[C])QFQTK|C(ITC[C])QFQTK|C(ITC[C])QFQTK|C(ITC[C])QFQTK||||	1|1|1|1||||	1.32|1.59|0.98|0.91||||	NA|NA|NA|NA||||	1.2	0.3157	4	4
P62913_21	RPL11	RL11_HUMAN 60S ribosomal protein L11 OS=Homo sapiens OX=9606 GN=RPL11 PE=1 SV=2	KLC(ITC[C])LNICVGESGDR C(ITC[C])LNICVGESGDR LC(ITC[C])LNICVGESGDR|KLC(ITC[C])LNICVGESGDR C(ITC[C])LNICVGESGDR|C(ITC[C])LNICVGESGDR LC(ITC[C])LNICVGESGDR|C(ITC[C])LNICVGESGDR LC(ITC[C])LNICVGESGDR|C(ITC[C])LNICVGESGDR LC(ITC[C])LNICVGESGDR|C(ITC[C])LNICVGESGDR LC(ITC[C])LNICVGESGDR|C(ITC[C])LNICVGESGDR LC(ITC[C])LNICVGESGDR|	5|4|2|3|3|5|4|	1.02|1.905|1.195|0.74|1.12|1.45|0.965|	0.86728|1.02673|0.41719|0.46765|0.02887|0.18623|0.37278|	1.19929	0.37973	26	7
P53609_32	PGGT1B	PGTB1_HUMAN Geranylgeranyl transferase type-1 subunit beta OS=Homo sapiens OX=9606 GN=PGGT1B PE=1 SV=2	|C(ITC[C])LQVLPER|C(ITC[C])LQVLPER|C(ITC[C])LQVLPER||||	|1|1|1||||	|1.37|1.21|1.01||||	|NA|NA|NA||||	1.19667	0.18037	3	3
P51610_149	HCFC1	HCFC1_HUMAN Host cell factor 1 OS=Homo sapiens OX=9606 GN=HCFC1 PE=1 SV=2	C(ITC[C])YLFGGLANDSEDPK|C(ITC[C])YLFGGLANDSEDPK|||||C(ITC[C])YLFGGLANDSEDPK|C(ITC[C])YLFGGLANDSEDPK	1|2|||||1|2	1.32|1.645|||||0.86|0.96	NA|0.02121|||||NA|0.21213	1.19625	0.3585	6	4
P62244_72	RPS15A	RS15A_HUMAN 40S ribosomal protein S15a OS=Homo sapiens OX=9606 GN=RPS15A PE=1 SV=2	C(ITC[C])GVISPR|C(ITC[C])GVISPR|C(ITC[C])GVISPR|C(ITC[C])GVISPR|C(ITC[C])GVISPR|C(ITC[C])GVISPR|C(ITC[C])GVISPR|C(ITC[C])GVISPR	13|15|11|10|9|9|8|11	1.07|1.0|1.11|1.075|1.35|1.48|1.225|1.25	0.10813|0.07106|0.11036|0.11519|0.14287|0.17283|0.13737|0.06813	1.195	0.16233	86	8
P53396_764	ACLY	ACLY_HUMAN ATP-citrate synthase OS=Homo sapiens OX=9606 GN=ACLY PE=1 SV=3	||C(ITC[C])ANQASETAVAK|C(ITC[C])ANQASETAVAK|C(ITC[C])ANQASETAVAK|C(ITC[C])ANQASETAVAK|C(ITC[C])ANQASETAVAK|C(ITC[C])ANQASETAVAK	||2|1|2|1|2|2	||1.37|1.45|0.945|0.97|1.24|1.19	||0.0|NA|0.09192|NA|0.01414|0.25456	1.19417	0.20534	10	6
Q01518_356	CAP1	CAP1_HUMAN Adenylyl cyclase-associated protein 1 OS=Homo sapiens OX=9606 GN=CAP1 PE=1 SV=5	C(ITC[C])VNTTLQIK|C(ITC[C])VNTTLQIK|C(ITC[C])VNTTLQIK|C(ITC[C])VNTTLQIK||||	4|1|5|3||||	1.46|1.67|0.88|0.76||||	0.16248|NA|0.06058|0.00577||||	1.1925	0.44131	13	4
P41252_87	IARS1	SYIC_HUMAN Isoleucine--tRNA ligase, cytoplasmic OS=Homo sapiens OX=9606 GN=IARS1 PE=1 SV=2	C(ITC[C])HGLPVEYEIDK|C(ITC[C])HGLPVEYEIDK|C(ITC[C])HGLPVEYEIDK|C(ITC[C])HGLPVEYEIDK|C(ITC[C])HGLPVEYEIDK|C(ITC[C])HGLPVEYEIDK|C(ITC[C])HGLPVEYEIDK|C(ITC[C])HGLPVEYEIDK	4|6|4|4|4|1|2|1	1.465|1.27|1.275|1.055|1.005|1.25|1.21|1.01	0.30456|0.28089|0.31532|0.14491|0.10472|NA|0.0|NA	1.1925	0.15949	26	8
P18077_47	RPL35A	RL35A_HUMAN 60S ribosomal protein L35a OS=Homo sapiens OX=9606 GN=RPL35A PE=1 SV=2	C(ITC[C])AYVYK|C(ITC[C])AYVYK|C(ITC[C])AYVYK|C(ITC[C])AYVYK|C(ITC[C])AYVYK|C(ITC[C])AYVYK||C(ITC[C])AYVYK	8|8|6|4|2|2||2	0.95|0.97|1.09|0.975|1.58|1.39||1.385	0.03012|0.06|0.06646|0.09747|0.14142|0.01414||0.00707	1.19143	0.25571	32	7
Q9GZR7_467	DDX24	DDX24_HUMAN ATP-dependent RNA helicase DDX24 OS=Homo sapiens OX=9606 GN=DDX24 PE=1 SV=1	|C(ITC[C])LVVDEADR|C(ITC[C])LVVDEADR|C(ITC[C])LVVDEADR||C(ITC[C])LVVDEADR||	|1|3|1||1||	|1.19|1.3|1.28||0.99||	|NA|0.03512|NA||NA||	1.19	0.14166	6	4
Q9NZI7_69	UBP1	UBIP1_HUMAN Upstream-binding protein 1 OS=Homo sapiens OX=9606 GN=UBP1 PE=1 SV=1	C(ITC[C])AATSPAVK|C(ITC[C])AATSPAVK||C(ITC[C])AATSPAVK|C(ITC[C])AATSPAVK|C(ITC[C])AATSPAVK||	2|3||2|1|1||	1.2|1.4||0.87|1.07|1.4||	0.25456|1.93155||0.02828|NA|NA||	1.188	0.22643	9	5
Q09161_728	NCBP1	NCBP1_HUMAN Nuclear cap-binding protein subunit 1 OS=Homo sapiens OX=9606 GN=NCBP1 PE=1 SV=1	|C(ITC[C])ETDGTSVLTPWYK|C(ITC[C])ETDGTSVLTPWYK||||C(ITC[C])ETDGTSVLTPWYK|	|1|1||||1|	|1.15|1.44||||0.97|	|NA|NA||||NA|	1.18667	0.23714	3	3
O00541_153	PES1	PESC_HUMAN Pescadillo homolog OS=Homo sapiens OX=9606 GN=PES1 PE=1 SV=1	C(ITC[C])HVQTIQLCR|C(ITC[C])HVQTIQLCR|C(ITC[C])HVQTIQLCR|C(ITC[C])HVQTIQLCR|C(ITC[C])HVQTIQLCR|C(ITC[C])HVQTIQLCR|C(ITC[C])HVQTIQLCR|C(ITC[C])HVQTIQLCR	5|5|5|3|3|1|4|2	1.48|1.24|0.9|0.94|1.68|1.26|1.0|0.985	0.09915|0.11992|0.01949|0.04933|0.30022|NA|0.13856|0.0495	1.18562	0.28187	28	8
Q6IE36_909	OVOS2	OVOS2_HUMAN Ovostatin homolog 2 OS=Homo sapiens OX=9606 GN=OVOS2 PE=2 SV=2	|||IC(ITC[C])TEGAK|IC(ITC[C])TEGAK|IC(ITC[C])TEGAK||IC(ITC[C])TEGAK	|||1|1|2||1	|||1.8|0.7|0.97||1.27	|||NA|NA|0.0||NA	1.185	0.47149	5	4
Q9UBQ0_15	VPS29	VPS29_HUMAN Vacuolar protein sorting-associated protein 29 OS=Homo sapiens OX=9606 GN=VPS29 PE=1 SV=1	C(ITC[C])NSLPAK|C(ITC[C])NSLPAK|C(ITC[C])NSLPAK|C(ITC[C])NSLPAK|C(ITC[C])NSLPAK|C(ITC[C])NSLPAK|C(ITC[C])NSLPAK|C(ITC[C])NSLPAK	5|7|5|6|4|3|5|3	0.58|0.61|1.7|1.705|1.06|1.05|1.38|1.39	0.03674|0.01902|0.12598|0.05477|0.03416|0.04041|0.04087|0.07211	1.18437	0.43853	38	8
O14562_33	UBFD1	UBFD1_HUMAN Ubiquitin domain-containing protein UBFD1 OS=Homo sapiens OX=9606 GN=UBFD1 PE=1 SV=2	C(ITC[C])LEAEAAAGAAAEDSGAAR|C(ITC[C])LEAEAAAGAAAEDSGAAR||C(ITC[C])LEAEAAAGAAAEDSGAAR||||	1|1||1||||	1.03|1.61||0.91||||	NA|NA||NA||||	1.18333	0.37434	3	3
Q01469_120	FABP5	FABP5_HUMAN Fatty acid-binding protein 5 OS=Homo sapiens OX=9606 GN=FABP5 PE=1 SV=3	C(ITC[C])VMNNVTCTR|||C(ITC[C])VMNNVTCTR|C(ITC[C])VMNNVTCTR|C(ITC[C])VMNNVTCTR||	1|||1|2|1||	0.52|||1.46|1.325|1.42||	NA|||NA|0.23335|NA||	1.18125	0.44445	5	4
P51991_85	HNRNPA3	ROA3_HUMAN Heterogeneous nuclear ribonucleoprotein A3 OS=Homo sapiens OX=9606 GN=HNRNPA3 PE=1 SV=2	|C(ITC[C])VEEVDAAMCAR|C(ITC[C])VEEVDAAMCAR|C(ITC[C])VEEVDAAMCAR|C(ITC[C])VEEVDAAMCAR|C(ITC[C])VEEVDAAMCAR|C(ITC[C])VEEVDAAMCAR|C(ITC[C])VEEVDAAMCAR	|1|2|3|1|2|1|2	|1.73|1.31|1.1|1.14|1.16|0.58|1.245	|NA|0.08485|0.14468|NA|0.0|NA|0.24749	1.18071	0.33961	12	7
Q9H078_572	CLPB	CLPB_HUMAN Caseinolytic peptidase B protein homolog OS=Homo sapiens OX=9606 GN=CLPB PE=1 SV=1	C(ITC[C])HSELIQLVNK|C(ITC[C])HSELIQLVNK|C(ITC[C])HSELIQLVNK|C(ITC[C])HSELIQLVNK|||C(ITC[C])HSELIQLVNK|C(ITC[C])HSELIQLVNK	3|1|1|1|||1|1	0.68|0.51|1.66|1.42|||1.49|1.32	0.02517|NA|NA|NA|||NA|NA	1.18	0.4696	8	6
O60341_573	KDM1A	KDM1A_HUMAN Lysine-specific histone demethylase 1A OS=Homo sapiens OX=9606 GN=KDM1A PE=1 SV=2	C(ITC[C])VPVALAEGLDIK||||C(ITC[C])VPVALAEGLDIK||C(ITC[C])VPVALAEGLDIK|C(ITC[C])VPVALAEGLDIK	1||||1||1|1	0.92||||1.02||0.95|1.83	NA||||NA||NA|NA	1.18	0.43535	4	4
P13693_28	TPT1	TCTP_HUMAN Translationally-controlled tumor protein OS=Homo sapiens OX=9606 GN=TPT1 PE=1 SV=1	||||C(ITC[C])LEVEGK|C(ITC[C])LEVEGK|C(ITC[C])LEVEGK|	||||2|1|1|	||||1.23|0.99|1.32|	||||0.0|NA|NA|	1.18	0.17059	4	3
Q9Y3U8_48	RPL36	RL36_HUMAN 60S ribosomal protein L36 OS=Homo sapiens OX=9606 GN=RPL36 PE=1 SV=3	C(ITC[C])GFAPYER||C(ITC[C])GFAPYER|||||C(ITC[C])GFAPYER	1||1|||||1	1.08||1.13|||||1.33	NA||NA|||||NA	1.18	0.13229	3	3
O14979_277	HNRNPDL	HNRDL_HUMAN Heterogeneous nuclear ribonucleoprotein D-like OS=Homo sapiens OX=9606 GN=HNRNPDL PE=1 SV=3	||C(ITC[C])FITYTDEEPVKK|C(ITC[C])FITYTDEEPVKK C(ITC[C])FITYTDEEPVK|||C(ITC[C])FITYTDEEPVK|C(ITC[C])FITYTDEEPVK	||1|4|||1|1	||1.49|1.185|||1.07|0.97	||NA|1.78715|||NA|NA	1.17875	0.22533	7	4
P61247_201	RPS3A	RS3A_HUMAN 40S ribosomal protein S3a OS=Homo sapiens OX=9606 GN=RPS3A PE=1 SV=2	C(ITC[C])QSIYPLHDVFVR AC(ITC[C])QSIYPLHDVFVR|C(ITC[C])QSIYPLHDVFVR|C(ITC[C])QSIYPLHDVFVR|C(ITC[C])QSIYPLHDVFVR|C(ITC[C])QSIYPLHDVFVR AC(ITC[C])QSIYPLHDVFVR|C(ITC[C])QSIYPLHDVFVR|C(ITC[C])QSIYPLHDVFVR AC(ITC[C])QSIYPLHDVFVR|C(ITC[C])QSIYPLHDVFVR AC(ITC[C])QSIYPLHDVFVR	7|7|6|4|7|3|6|7	1.0|1.02|1.285|1.18|1.12|0.98|1.135|1.7	0.24929|0.23027|0.4293|0.26082|0.12829|0.06658|0.17774|1.18665	1.1775	0.23452	47	8
P34932_290	HSPA4	HSP74_HUMAN Heat shock 70 kDa protein 4 OS=Homo sapiens OX=9606 GN=HSPA4 PE=1 SV=4	||||C(ITC[C])FMNDVDVSGTMNR||C(ITC[C])FMNDVDVSGTMNR|C(ITC[C])FMNDVDVSGTMNR	||||1||4|1	||||0.92||1.47|1.14	||||NA||0.31854|NA	1.17667	0.27683	6	3
P41250_180	GARS1	GARS_HUMAN Glycine--tRNA ligase OS=Homo sapiens OX=9606 GN=GARS1 PE=1 SV=3	||||C(ITC[C])TMLTPEPVLK|C(ITC[C])TMLTPEPVLK|C(ITC[C])TMLTPEPVLK|C(ITC[C])TMLTPEPVLK	||||2|2|1|2	||||0.99|0.9|1.45|1.365	||||0.0|0.0|NA|0.13435	1.17625	0.27177	7	4
Q99567_713	NUP88	NUP88_HUMAN Nuclear pore complex protein Nup88 OS=Homo sapiens OX=9606 GN=NUP88 PE=1 SV=2	C(ITC[C])IQSILK|C(ITC[C])IQSILK|C(ITC[C])IQSILK|C(ITC[C])IQSILK||C(ITC[C])IQSILK|C(ITC[C])IQSILK|	3|3|1|2||1|2|	1.57|1.44|1.02|0.865||1.17|0.99|	0.12503|0.01732|NA|0.00707||NA|0.02828|	1.17583	0.27591	12	6
Q9BSD7_110	NTPCR	NTPCR_HUMAN Cancer-related nucleoside-triphosphatase OS=Homo sapiens OX=9606 GN=NTPCR PE=1 SV=1	||C(ITC[C])VIDEIGK|||C(ITC[C])VIDEIGK|C(ITC[C])VIDEIGK|	||1|||2|1|	||1.18|||1.255|1.09|	||NA|||0.38891|NA|	1.175	0.08261	4	3
O15355_351	PPM1G	PPM1G_HUMAN Protein phosphatase 1G OS=Homo sapiens OX=9606 GN=PPM1G PE=1 SV=1	C(ITC[C])VVSEAGK|C(ITC[C])VVSEAGK|C(ITC[C])VVSEAGK|C(ITC[C])VVSEAGK|C(ITC[C])VVSEAGK|C(ITC[C])VVSEAGK|C(ITC[C])VVSEAGK|C(ITC[C])VVSEAGK	4|2|1|2|3|4|1|3	0.98|0.985|1.19|1.21|1.24|1.115|1.22|1.45	0.07188|0.09192|NA|0.0|0.0|0.07141|NA|0.02887	1.17375	0.15168	20	8
P11586_152	MTHFD1	C1TC_HUMAN C-1-tetrahydrofolate synthase, cytoplasmic OS=Homo sapiens OX=9606 GN=MTHFD1 PE=1 SV=3	|GC(ITC[C])LELIK|GC(ITC[C])LELIK|GC(ITC[C])LELIK|GC(ITC[C])LELIK|GC(ITC[C])LELIK||GC(ITC[C])LELIK	|1|2|3|3|3||1	|1.66|0.82|0.77|1.29|1.44||1.06	|NA|0.39598|0.25384|0.34962|0.02646||NA	1.17333	0.35268	13	6
Q8NDX6_50	ZNF740	ZN740_HUMAN Zinc finger protein 740 OS=Homo sapiens OX=9606 GN=ZNF740 PE=1 SV=1	||C(ITC[C])SSQGHR|C(ITC[C])SSQGHR||C(ITC[C])SSQGHR||C(ITC[C])SSQGHR	||1|1||1||1	||1.31|1.26||1.16||0.96	||NA|NA||NA||NA	1.1725	0.15478	4	4
P09874_24	PARP1	PARP1_HUMAN Poly [ADP-ribose] polymerase 1 OS=Homo sapiens OX=9606 GN=PARP1 PE=1 SV=4	C(ITC[C])SESIPK|C(ITC[C])SESIPK|C(ITC[C])SESIPK|C(ITC[C])SESIPK||||	2|2|1|2||||	0.995|1.51|0.97|1.205||||	0.02121|0.0|NA|0.02121||||	1.17	0.24997	7	4
P55265_649	ADAR	DSRAD_HUMAN Double-stranded RNA-specific adenosine deaminase OS=Homo sapiens OX=9606 GN=ADAR PE=1 SV=4	C(ITC[C])VAVGAQTFPSVSAPSK|||C(ITC[C])VAVGAQTFPSVSAPSK|C(ITC[C])VAVGAQTFPSVSAPSK|C(ITC[C])VAVGAQTFPSVSAPSK||	1|||3|1|1||	1.39|||0.8|1.13|1.35||	NA|||0.14434|NA|NA||	1.1675	0.27035	6	4
P46779_13	RPL28	RL28_HUMAN 60S ribosomal protein L28 OS=Homo sapiens OX=9606 GN=RPL28 PE=1 SV=3	NC(ITC[C])SSFLIK C(ITC[C])SSFLIK|NC(ITC[C])SSFLIK C(ITC[C])SSFLIK|NC(ITC[C])SSFLIK C(ITC[C])SSFLIK|C(ITC[C])SSFLIK|C(ITC[C])SSFLIK|NC(ITC[C])SSFLIK C(ITC[C])SSFLIK|C(ITC[C])SSFLIK|C(ITC[C])SSFLIK	4|3|2|1|3|4|2|4	0.92|1.05|1.335|1.28|1.08|1.185|1.14|1.35	0.02986|0.20502|0.10607|NA|0.04041|0.27753|0.04243|0.12203	1.1675	0.15014	23	8
P25398_69	RPS12	RS12_HUMAN 40S ribosomal protein S12 OS=Homo sapiens OX=9606 GN=RPS12 PE=1 SV=3	C(ITC[C])AEHQINLIK||C(ITC[C])AEHQINLIK||C(ITC[C])AEHQINLIK||C(ITC[C])AEHQINLIK|	2||2||1||1|	1.1||1.215||1.24||1.11|	0.5374||0.23335||NA||NA|	1.16625	0.07157	6	4
P49757_37	NUMB	NUMB_HUMAN Protein numb homolog OS=Homo sapiens OX=9606 GN=NUMB PE=1 SV=2	||C(ITC[C])SFPVK|C(ITC[C])SFPVK|C(ITC[C])SFPVK|C(ITC[C])SFPVK|C(ITC[C])SFPVK|C(ITC[C])SFPVK	||3|1|2|3|3|1	||1.19|1.12|1.03|0.98|1.46|1.21	||0.03512|NA|0.01414|0.21939|0.29816|NA	1.165	0.16979	13	6
Q9H2U2_290	PPA2	IPYR2_HUMAN Inorganic pyrophosphatase 2, mitochondrial OS=Homo sapiens OX=9606 GN=PPA2 PE=1 SV=2	C(ITC[C])TNVQISDSPFR|C(ITC[C])TNVQISDSPFR||C(ITC[C])TNVQISDSPFR|C(ITC[C])TNVQISDSPFR|C(ITC[C])TNVQISDSPFR||C(ITC[C])TNVQISDSPFR	1|1||2|2|1||1	0.81|1.12||1.265|1.15|1.41||1.21	NA|NA||0.17678|0.01414|NA||NA	1.16083	0.20011	8	6
Q99832_345	CCT7	TCPH_HUMAN T-complex protein 1 subunit eta OS=Homo sapiens OX=9606 GN=CCT7 PE=1 SV=2	C(ITC[C])QVFEETQIGGER|C(ITC[C])QVFEETQIGGER|C(ITC[C])QVFEETQIGGER|C(ITC[C])QVFEETQIGGER|C(ITC[C])QVFEETQIGGER|C(ITC[C])QVFEETQIGGER|C(ITC[C])QVFEETQIGGER|C(ITC[C])QVFEETQIGGER	6|4|5|9|4|2|4|4	1.635|1.535|0.94|0.94|1.135|1.23|0.88|0.99	0.33661|0.09201|0.03421|0.06924|0.10436|0.0|0.00816|0.09381	1.16063	0.28682	38	8
O43447_131	PPIH	PPIH_HUMAN Peptidyl-prolyl cis-trans isomerase H OS=Homo sapiens OX=9606 GN=PPIH PE=1 SV=1	|C(ITC[C])DWLDGK|C(ITC[C])DWLDGK|C(ITC[C])DWLDGK||||	|1|1|1||||	|1.07|1.46|0.95||||	|NA|NA|NA||||	1.16	0.26665	3	3
Q9NR30_682	DDX21	DDX21_HUMAN Nucleolar RNA helicase 2 OS=Homo sapiens OX=9606 GN=DDX21 PE=1 SV=5	C(ITC[C])FDVPTASVTEIQEK|C(ITC[C])FDVPTASVTEIQEK|C(ITC[C])FDVPTASVTEIQEK|||||C(ITC[C])FDVPTASVTEIQEK	1|3|1|||||2	1.06|0.84|1.23|||||1.505	NA|0.1044|NA|||||0.02121	1.15875	0.28067	7	4
Q9Y4A5_2449	TRRAP	TRRAP_HUMAN Transformation/transcription domain-associated protein OS=Homo sapiens OX=9606 GN=TRRAP PE=1 SV=3	C(ITC[C])AQPLIR|C(ITC[C])AQPLIR|C(ITC[C])AQPLIR|C(ITC[C])AQPLIR|C(ITC[C])AQPLIR||C(ITC[C])AQPLIR|C(ITC[C])AQPLIR	3|3|1|1|1||1|1	0.98|0.92|1.03|1.15|1.13||1.12|1.78	0.13317|0.11015|NA|NA|NA||NA|NA	1.15857	0.2869	11	7
P60891_41	PRPS1	PRPS1_HUMAN Ribose-phosphate pyrophosphokinase 1 OS=Homo sapiens OX=9606 GN=PRPS1 PE=1 SV=2	|||C(ITC[C])VEIGESVR|C(ITC[C])VEIGESVR|C(ITC[C])VEIGESVR|C(ITC[C])VEIGESVR|C(ITC[C])VEIGESVR	|||1|1|1|2|1	|||1.15|1.03|1.15|1.23|1.23	|||NA|NA|NA|0.01414|NA	1.158	0.08198	6	5
P13639_41	EEF2	EF2_HUMAN Elongation factor 2 OS=Homo sapiens OX=9606 GN=EEF2 PE=1 SV=4	STLTDSLVC(ITC[C])K||STLTDSLVC(ITC[C])K|STLTDSLVC(ITC[C])K|STLTDSLVC(ITC[C])K STLTDSLVC(ITC[C])KAGIIASAR|STLTDSLVC(ITC[C])K|STLTDSLVC(ITC[C])K STLTDSLVC(ITC[C])KAGIIASAR|STLTDSLVC(ITC[C])K STLTDSLVC(ITC[C])KAGIIASAR	1||1|1|3|1|2|3	1.34||1.38|1.1|0.97|1.01|1.395|0.91	NA||NA|NA|0.08386|NA|0.55861|0.26627	1.15786	0.20844	12	7
Q9NVP1_329	DDX18	DDX18_HUMAN ATP-dependent RNA helicase DDX18 OS=Homo sapiens OX=9606 GN=DDX18 PE=1 SV=2	|||C(ITC[C])LVIDEADR||C(ITC[C])LVIDEADR|C(ITC[C])LVIDEADR|C(ITC[C])LVIDEADR	|||1||1|1|1	|||1.33||0.98|1.32|1.0	|||NA||NA|NA|NA	1.1575	0.19363	4	4
O14787_609	TNPO2	TNPO2_HUMAN Transportin-2 OS=Homo sapiens OX=9606 GN=TNPO2 PE=1 SV=3	C(ITC[C])VTLVQK||||C(ITC[C])VTLVQK||C(ITC[C])VTLVQK|C(ITC[C])VTLVQK	2||||1||1|1	1.335||||1.15||1.08|1.06	0.12021||||NA||NA|NA	1.15625	0.12526	5	4
P54136_32	RARS1	SYRC_HUMAN Arginine--tRNA ligase, cytoplasmic OS=Homo sapiens OX=9606 GN=RARS1 PE=1 SV=2	NC(ITC[C])GCLGASPNLEQLQEENLK||NC(ITC[C])GCLGASPNLEQLQEENLK||C(ITC[C])GCLGASPNLEQLQEENLK NC(ITC[C])GCLGASPNLEQLQEENLK||NC(ITC[C])GCLGASPNLEQLQEENLK|NC(ITC[C])GCLGASPNLEQLQEENLK	1||1||3||1|1	0.88||1.14||0.8||1.89|1.06	NA||NA||0.26577||NA|NA	1.154	0.43334	7	5
Q01813_179	PFKP	PFKAP_HUMAN ATP-dependent 6-phosphofructokinase, platelet type OS=Homo sapiens OX=9606 GN=PFKP PE=1 SV=2	||C(ITC[C])GTDMTIGTDSALHR|C(ITC[C])GTDMTIGTDSALHR|C(ITC[C])GTDMTIGTDSALHR||C(ITC[C])GTDMTIGTDSALHR|C(ITC[C])GTDMTIGTDSALHR	||2|1|1||1|1	||1.545|0.94|0.9||1.11|1.27	||0.07778|NA|NA||NA|NA	1.153	0.2639	6	5
P62701_181	RPS4X	RS4X_HUMAN 40S ribosomal protein S4, X isoform OS=Homo sapiens OX=9606 GN=RPS4X PE=1 SV=2	C(ITC[C])MVTGGANLGR|C(ITC[C])MVTGGANLGR|||C(ITC[C])MVTGGANLGR||C(ITC[C])MVTGGANLGR|	1|2|||1||1|	0.92|0.75|||1.39||1.55|	NA|0.04243|||NA||NA|	1.1525	0.3788	5	4
Q9P258_42	RCC2	RCC2_HUMAN Protein RCC2 OS=Homo sapiens OX=9606 GN=RCC2 PE=1 SV=2	|C(ITC[C])SSSSGGGSSGDEDGLELDGAPGGGK|C(ITC[C])SSSSGGGSSGDEDGLELDGAPGGGKR C(ITC[C])SSSSGGGSSGDEDGLELDGAPGGGK|C(ITC[C])SSSSGGGSSGDEDGLELDGAPGGGK|||C(ITC[C])SSSSGGGSSGDEDGLELDGAPGGGK|C(ITC[C])SSSSGGGSSGDEDGLELDGAPGGGK	|2|2|3|||1|1	|0.59|1.13|1.68|||0.91|1.45	|0.07071|0.50912|0.16643|||NA|NA	1.152	0.43084	9	5
P31153_104	MAT2A	METK2_HUMAN S-adenosylmethionine synthase isoform type-2 OS=Homo sapiens OX=9606 GN=MAT2A PE=1 SV=1	C(ITC[C])NVLVALEQQSPDIAQGVHLDR|||C(ITC[C])NVLVALEQQSPDIAQGVHLDR||C(ITC[C])NVLVALEQQSPDIAQGVHLDR|C(ITC[C])NVLVALEQQSPDIAQGVHLDR|	1|||1||2|2|	1.35|||0.61||1.31|1.335|	NA|||NA||0.0|0.54447|	1.15125	0.36121	6	4
P36578_208	RPL4	RL4_HUMAN 60S ribosomal protein L4 OS=Homo sapiens OX=9606 GN=RPL4 PE=1 SV=5	C(ITC[C])IIYNEDNGIIK|C(ITC[C])IIYNEDNGIIK|C(ITC[C])IIYNEDNGIIK|C(ITC[C])IIYNEDNGIIK|C(ITC[C])IIYNEDNGIIK|C(ITC[C])IIYNEDNGIIK|C(ITC[C])IIYNEDNGIIK|C(ITC[C])IIYNEDNGIIK	3|1|2|2|3|4|2|3	1.13|1.06|1.18|1.255|1.12|1.14|1.21|1.11	0.07506|NA|0.07071|0.14849|0.30806|0.50176|0.09899|0.07506	1.15062	0.06167	20	8
Q08170_115	SRSF4	SRSF4_HUMAN Serine/arginine-rich splicing factor 4 OS=Homo sapiens OX=9606 GN=SRSF4 PE=1 SV=2	||C(ITC[C])SWQDLK||C(ITC[C])SWQDLK|C(ITC[C])SWQDLK|C(ITC[C])SWQDLK|	||4||1|3|1|	||1.16||1.42|1.02|1.0|	||0.07659||NA|0.04726|NA|	1.15	0.19356	9	4
Q9UKN8_788	GTF3C4	TF3C4_HUMAN General transcription factor 3C polypeptide 4 OS=Homo sapiens OX=9606 GN=GTF3C4 PE=1 SV=2	C(ITC[C])LLHDSIAR|C(ITC[C])LLHDSIAR|C(ITC[C])LLHDSIAR|C(ITC[C])LLHDSIAR|C(ITC[C])LLHDSIAR|C(ITC[C])LLHDSIAR|C(ITC[C])LLHDSIAR|C(ITC[C])LLHDSIAR	4|1|5|2|2|3|1|2	0.945|2.2|0.97|0.915|0.78|1.05|1.14|1.18	0.23243|NA|0.09028|0.02121|0.19799|0.12124|NA|0.12728	1.1475	0.44401	20	8
Q2T9J0_110	TYSND1	TYSD1_HUMAN Peroxisomal leader peptide-processing protease OS=Homo sapiens OX=9606 GN=TYSND1 PE=1 SV=3	|||C(ITC[C])ASLEPGPPAPSR|C(ITC[C])ASLEPGPPAPSR|C(ITC[C])ASLEPGPPAPSR||	|||1|1|1||	|||0.71|1.18|1.55||	|||NA|NA|NA||	1.14667	0.42099	3	3
Q96F07_1265	CYFIP2	CYFP2_HUMAN Cytoplasmic FMR1-interacting protein 2 OS=Homo sapiens OX=9606 GN=CYFIP2 PE=1 SV=2	C(ITC[C])FQPPIHQSLATTC||C(ITC[C])FQPPIHQSLATTC|C(ITC[C])FQPPIHQSLATTC||||	1||2|3||||	1.54||0.92|0.98||||	NA||0.25456|0.05292||||	1.14667	0.34196	6	3
P11021_41	HSPA5	BIP_HUMAN Endoplasmic reticulum chaperone BiP OS=Homo sapiens OX=9606 GN=HSPA5 PE=1 SV=2	||||C(ITC[C])VGVFK|C(ITC[C])VGVFK||C(ITC[C])VGVFK	||||1|1||1	||||0.98|1.22||1.24	||||NA|NA||NA	1.14667	0.14468	3	3
Q96EL2_103	MRPS24	RT24_HUMAN 28S ribosomal protein S24, mitochondrial OS=Homo sapiens OX=9606 GN=MRPS24 PE=1 SV=1	||C(ITC[C])LADQLVLK|||C(ITC[C])LADQLVLK||C(ITC[C])LADQLVLK	||1|||1||1	||1.22|||1.05||1.16	||NA|||NA||NA	1.14333	0.08622	3	3
Q3SXM5_265	HSDL1	HSDL1_HUMAN Inactive hydroxysteroid dehydrogenase-like protein 1 OS=Homo sapiens OX=9606 GN=HSDL1 PE=1 SV=3	C(ITC[C])SWLVPSPK|C(ITC[C])SWLVPSPK|C(ITC[C])SWLVPSPK|C(ITC[C])SWLVPSPK|C(ITC[C])SWLVPSPK|C(ITC[C])SWLVPSPK|C(ITC[C])SWLVPSPK|C(ITC[C])SWLVPSPK	2|3|2|2|4|3|1|1	1.7|1.92|1.1|1.105|0.75|0.94|0.95|0.68	0.08485|0.27791|0.02828|0.00707|0.18|0.16371|NA|NA	1.14312	0.44151	18	8
Q15424_448	SAFB	SAFB1_HUMAN Scaffold attachment factor B1 OS=Homo sapiens OX=9606 GN=SAFB PE=1 SV=4	C(ITC[C])YGFVTMSTAEEATK|C(ITC[C])YGFVTMSTAEEATK|C(ITC[C])YGFVTMSTAEEATK|C(ITC[C])YGFVTMSTAEEATK|C(ITC[C])YGFVTMSTAEEATK|C(ITC[C])YGFVTMSTAEEATK|C(ITC[C])YGFVTMSTAEEATK|C(ITC[C])YGFVTMSTAEEATK	4|3|5|1|1|1|1|1	0.515|0.52|1.42|1.31|1.14|1.03|1.63|1.56	0.05196|0.04041|0.22512|NA|NA|NA|NA|NA	1.14062	0.43275	17	8
P25685_269	DNAJB1	DNJB1_HUMAN DnaJ homolog subfamily B member 1 OS=Homo sapiens OX=9606 GN=DNAJB1 PE=1 SV=4	|||C(ITC[C])TVNVPTLDGR|C(ITC[C])TVNVPTLDGR|C(ITC[C])TVNVPTLDGR|EALCGC(ITC[C])TVNVPTLDGR|C(ITC[C])TVNVPTLDGR	|||1|1|1|1|3	|||1.73|1.02|0.91|0.96|1.08	|||NA|NA|NA|NA|0.17898	1.14	0.33593	7	5
O60343_316	TBC1D4	TBCD4_HUMAN TBC1 domain family member 4 OS=Homo sapiens OX=9606 GN=TBC1D4 PE=1 SV=2	C(ITC[C])SSVTGVQR|C(ITC[C])SSVTGVQR|||||C(ITC[C])SSVTGVQR|C(ITC[C])SSVTGVQR	1|3|||||1|1	1.28|1.53|||||0.75|0.99	NA|0.49075|||||NA|NA	1.1375	0.33974	6	4
P49327_1448	FASN	FAS_HUMAN Fatty acid synthase OS=Homo sapiens OX=9606 GN=FASN PE=1 SV=3	C(ITC[C])ATSGVVGLVNCLR|C(ITC[C])ATSGVVGLVNCLR|C(ITC[C])ATSGVVGLVNCLR|C(ITC[C])ATSGVVGLVNCLR|C(ITC[C])ATSGVVGLVNCLR|C(ITC[C])ATSGVVGLVNCLR|C(ITC[C])ATSGVVGLVNCLR|C(ITC[C])ATSGVVGLVNCLR	2|1|4|3|1|2|4|4	1.715|1.84|1.075|0.78|0.98|0.83|0.97|0.905	0.07778|NA|0.20304|0.02082|NA|0.14142|0.08921|0.28196	1.13688	0.40711	21	8
Q9UBB6_4	NCDN	NCDN_HUMAN Neurochondrin OS=Homo sapiens OX=9606 GN=NCDN PE=1 SV=1	||C(ITC[C])DLAAAGQLGK|CC(ITC[C])DLAAAGQLGK|||CC(ITC[C])DLAAAGQLGK|	||1|1|||1|	||1.06|1.38|||0.97|	||NA|NA|||NA|	1.13667	0.21548	3	3
P60059_25	SEC61G	SC61G_HUMAN Protein transport protein Sec61 subunit gamma OS=Homo sapiens OX=9606 GN=SEC61G PE=1 SV=1	C(ITC[C])TKPDR|C(ITC[C])TKPDR|C(ITC[C])TKPDR|C(ITC[C])TKPDR||||	1|1|2|1||||	1.31|1.38|0.93|0.92||||	NA|NA|0.0|NA||||	1.135	0.2442	5	4
Q6UB35_198	MTHFD1L	C1TM_HUMAN Monofunctional C1-tetrahydrofolate synthase, mitochondrial OS=Homo sapiens OX=9606 GN=MTHFD1L PE=1 SV=1	|||C(ITC[C])FVSPVAK||C(ITC[C])FVSPVAK|C(ITC[C])FVSPVAK|C(ITC[C])FVSPVAK	|||1||2|1|1	|||1.22||1.285|1.0|1.03	|||NA||0.03536|NA|NA	1.13375	0.1402	5	4
Q9H0U9_160	TSPYL1	TSYL1_HUMAN Testis-specific Y-encoded-like protein 1 OS=Homo sapiens OX=9606 GN=TSPYL1 PE=1 SV=3	C(ITC[C])ATVSAAVAER|C(ITC[C])ATVSAAVAER|C(ITC[C])ATVSAAVAER|C(ITC[C])ATVSAAVAER||||	2|3|1|1||||	0.93|0.98|1.46|1.16||||	0.0|0.18175|NA|NA||||	1.1325	0.23964	7	4
Q02543_16	RPL18A	RL18A_HUMAN 60S ribosomal protein L18a OS=Homo sapiens OX=9606 GN=RPL18A PE=1 SV=2	C(ITC[C])LPTPK|C(ITC[C])LPTPK|C(ITC[C])LPTPK|C(ITC[C])LPTPK|C(ITC[C])LPTPK|C(ITC[C])LPTPK|C(ITC[C])LPTPK|C(ITC[C])LPTPK	13|13|3|3|6|4|5|6	0.47|0.48|1.44|1.5|1.225|1.25|1.35|1.33	0.0304|0.20184|0.03055|0.04509|0.01966|0.05972|0.06914|0.05468	1.13062	0.41454	53	8
Q15269_24	PWP2	PWP2_HUMAN Periodic tryptophan protein 2 homolog OS=Homo sapiens OX=9606 GN=PWP2 PE=2 SV=2	C(ITC[C])DGNSVISPVGNR||C(ITC[C])DGNSVISPVGNR||C(ITC[C])DGNSVISPVGNR|C(ITC[C])DGNSVISPVGNR||C(ITC[C])DGNSVISPVGNR	2||1||1|1||1	0.89||1.5||1.24|0.9||1.11	0.14142||NA||NA|NA||NA	1.128	0.25489	6	5
O15042_65	U2SURP	SR140_HUMAN U2 snRNP-associated SURP motif-containing protein OS=Homo sapiens OX=9606 GN=U2SURP PE=1 SV=2	C(ITC[C])DSPHQNLSR|C(ITC[C])DSPHQNLSR|C(ITC[C])DSPHQNLSR||||C(ITC[C])DSPHQNLSR|C(ITC[C])DSPHQNLSR	1|1|1||||1|1	0.79|1.03|1.21||||1.47|1.14	NA|NA|NA||||NA|NA	1.128	0.24884	5	5
P07858_319	CTSB	CATB_HUMAN Cathepsin B OS=Homo sapiens OX=9606 GN=CTSB PE=1 SV=3	|C(ITC[C])GIESEVVAGIPR||||C(ITC[C])GIESEVVAGIPR|C(ITC[C])GIESEVVAGIPR|C(ITC[C])GIESEVVAGIPR	|1||||2|4|4	|1.53||||0.86|1.27|0.85	|NA||||0.0|0.53018|0.09866	1.1275	0.3321	11	4
P39023_253	RPL3	RL3_HUMAN 60S ribosomal protein L3 OS=Homo sapiens OX=9606 GN=RPL3 PE=1 SV=2	C(ITC[C])IGAWHPAR|C(ITC[C])IGAWHPAR|C(ITC[C])IGAWHPAR|C(ITC[C])IGAWHPAR|C(ITC[C])IGAWHPAR|C(ITC[C])IGAWHPAR|C(ITC[C])IGAWHPAR|C(ITC[C])IGAWHPAR	7|6|3|3|2|4|5|4	1.4|1.37|0.96|0.93|1.165|1.065|1.04|1.085	0.1754|0.18444|0.02517|0.04509|0.00707|0.03202|0.0705|0.101	1.12688	0.17521	34	8
Q14166_528	TTLL12	TTL12_HUMAN Tubulin--tyrosine ligase-like protein 12 OS=Homo sapiens OX=9606 GN=TTLL12 PE=1 SV=2	|C(ITC[C])EEFIPEFEK|C(ITC[C])EEFIPEFEK|C(ITC[C])EEFIPEFEK||C(ITC[C])EEFIPEFEK||C(ITC[C])EEFIPEFEK	|3|3|3||3||3	|1.23|1.08|0.99||0.99||1.34	|0.15948|0.17898|0.09238||0.00577||0.15588	1.126	0.15469	15	5
Q9UBU9_143	NXF1	NXF1_HUMAN Nuclear RNA export factor 1 OS=Homo sapiens OX=9606 GN=NXF1 PE=1 SV=1	C(ITC[C])SVPFTPIEFHYENTR|C(ITC[C])SVPFTPIEFHYENTR||C(ITC[C])SVPFTPIEFHYENTR||C(ITC[C])SVPFTPIEFHYENTR||	1|2||1||1||	1.09|0.975||1.26||1.17||	NA|0.14849||NA||NA||	1.12375	0.12106	5	4
P36578_250	RPL4	RL4_HUMAN 60S ribosomal protein L4 OS=Homo sapiens OX=9606 GN=RPL4 PE=1 SV=5	C(ITC[C])IWTESAFR|||||C(ITC[C])IWTESAFR|C(ITC[C])IWTESAFR|	2|||||1|2|	1.02|||||1.27|1.08|	0.02828|||||NA|0.08485|	1.12333	0.13051	5	3
P07900_420	HSP90AA1	HS90A_HUMAN Heat shock protein HSP 90-alpha OS=Homo sapiens OX=9606 GN=HSP90AA1 PE=1 SV=5	C(ITC[C])LELFTELAEDKENYKK C(ITC[C])LELFTELAEDKENYK C(ITC[C])LELFTELAEDK|C(ITC[C])LELFTELAEDKENYKK C(ITC[C])LELFTELAEDKENYK C(ITC[C])LELFTELAEDK|C(ITC[C])LELFTELAEDKENYKK C(ITC[C])LELFTELAEDKENYK C(ITC[C])LELFTELAEDK|C(ITC[C])LELFTELAEDKENYKK C(ITC[C])LELFTELAEDKENYK C(ITC[C])LELFTELAEDK|||C(ITC[C])LELFTELAEDKENYK|	13|13|6|6|||1|	1.52|1.51|0.93|0.915|||0.74|	0.14396|0.20459|0.19763|0.0709|||NA|	1.123	0.36557	39	5
P17812_218	CTPS1	PYRG1_HUMAN CTP synthase 1 OS=Homo sapiens OX=9606 GN=CTPS1 PE=1 SV=2	C(ITC[C])SNPLDTSVK|C(ITC[C])SNPLDTSVK|C(ITC[C])SNPLDTSVK|C(ITC[C])SNPLDTSVK|C(ITC[C])SNPLDTSVK|C(ITC[C])SNPLDTSVK|C(ITC[C])SNPLDTSVK|C(ITC[C])SNPLDTSVK	4|8|6|5|4|4|3|3	0.9|0.79|1.325|0.97|1.22|1.155|1.26|1.36	0.13817|0.23679|0.17683|0.44432|0.10595|0.16753|0.37072|0.05686	1.1225	0.21051	37	8
O75874_73	IDH1	IDHC_HUMAN Isocitrate dehydrogenase [NADP] cytoplasmic OS=Homo sapiens OX=9606 GN=IDH1 PE=1 SV=2	C(ITC[C])ATITPDEK||C(ITC[C])ATITPDEK|C(ITC[C])ATITPDEK|C(ITC[C])ATITPDEK|C(ITC[C])ATITPDEK|C(ITC[C])ATITPDEK|C(ITC[C])ATITPDEK	1||4|4|1|3|2|3	0.72||1.445|1.42|0.92|0.82|1.38|1.15	NA||0.15684|0.11091|NA|0.24249|0.28284|0.11846	1.12214	0.30389	18	7
P50213_127	IDH3A	IDH3A_HUMAN Isocitrate dehydrogenase [NAD] subunit alpha, mitochondrial OS=Homo sapiens OX=9606 GN=IDH3A PE=1 SV=1	C(ITC[C])VSIEGYK|C(ITC[C])VSIEGYK|||C(ITC[C])VSIEGYK|C(ITC[C])VSIEGYK||C(ITC[C])VSIEGYK	1|1|||1|1||2	1.83|1.19|||0.88|0.9||0.81	NA|NA|||NA|NA||0.04243	1.122	0.42163	6	5
O15144_120	ARPC2	ARPC2_HUMAN Actin-related protein 2/3 complex subunit 2 OS=Homo sapiens OX=9606 GN=ARPC2 PE=1 SV=1	|C(ITC[C])FASVFEK||C(ITC[C])FASVFEK||||C(ITC[C])FASVFEK	|1||2||||1	|1.53||1.035||||0.8	|NA||0.45962||||NA	1.12167	0.37264	4	3
P60891_165	PRPS1	PRPS1_HUMAN Ribose-phosphate pyrophosphokinase 1 OS=Homo sapiens OX=9606 GN=PRPS1 PE=1 SV=2	C(ITC[C])TIVSPDAGGAK|C(ITC[C])TIVSPDAGGAK|C(ITC[C])TIVSPDAGGAK|C(ITC[C])TIVSPDAGGAK|C(ITC[C])TIVSPDAGGAK||NC(ITC[C])TIVSPDAGGAK C(ITC[C])TIVSPDAGGAK|C(ITC[C])TIVSPDAGGAK	5|6|4|5|2||5|3	0.92|0.82|1.4|1.31|0.99||1.2|1.21	0.12716|0.14153|0.015|0.1554|0.0||0.06403|0.04041	1.12143	0.21443	30	7
P49327_1118	FASN	FAS_HUMAN Fatty acid synthase OS=Homo sapiens OX=9606 GN=FASN PE=1 SV=3	C(ITC[C])FTPHTEEGCLSER||C(ITC[C])FTPHTEEGCLSER||C(ITC[C])FTPHTEEGCLSER|C(ITC[C])FTPHTEEGCLSER|C(ITC[C])FTPHTEEGCLSER|C(ITC[C])FTPHTEEGCLSER	1||2||1|4|2|2	1.52||1.375||1.04|1.085|0.695|1.005	NA||0.19092||NA|0.10677|0.10607|0.02121	1.12	0.29206	12	6
Q15185_58	PTGES3	TEBP_HUMAN Prostaglandin E synthase 3 OS=Homo sapiens OX=9606 GN=PTGES3 PE=1 SV=1	C(ITC[C])IDPNDSK|C(ITC[C])IDPNDSK|C(ITC[C])IDPNDSK|||C(ITC[C])IDPNDSK|C(ITC[C])IDPNDSK|C(ITC[C])IDPNDSK	3|4|3|||2|2|1	0.89|0.92|1.31|||1.205|1.2|1.19	0.03055|0.07303|0.07506|||0.37477|0.05657|NA	1.11917	0.17177	15	6
O60341_195	KDM1A	KDM1A_HUMAN Lysine-specific histone demethylase 1A OS=Homo sapiens OX=9606 GN=KDM1A PE=1 SV=2	|C(ITC[C])FPDIISGPQQTQK||C(ITC[C])FPDIISGPQQTQK||C(ITC[C])FPDIISGPQQTQK|C(ITC[C])FPDIISGPQQTQK|	|1||1||1|1|	|0.89||1.36||1.15|1.07|	|NA||NA||NA|NA|	1.1175	0.19483	4	4
Q13347_160	EIF3I	EIF3I_HUMAN Eukaryotic translation initiation factor 3 subunit I OS=Homo sapiens OX=9606 GN=EIF3I PE=1 SV=1	||C(ITC[C])IIAGHESGELNQYSAK|C(ITC[C])IIAGHESGELNQYSAK||C(ITC[C])IIAGHESGELNQYSAK||C(ITC[C])IIAGHESGELNQYSAK	||1|1||2||1	||1.08|1.11||1.18||1.1	||NA|NA||0.04243||NA	1.1175	0.04349	5	4
Q9ULT8_2071	HECTD1	HECD1_HUMAN E3 ubiquitin-protein ligase HECTD1 OS=Homo sapiens OX=9606 GN=HECTD1 PE=1 SV=3	C(ITC[C])PFLIPFETR||||||C(ITC[C])PFLIPFETR|C(ITC[C])PFLIPFETR	1||||||2|1	1.6||||||0.96|0.79	NA||||||0.0|NA	1.11667	0.42712	4	3
Q02817_712	MUC2	MUC2_HUMAN Mucin-2 OS=Homo sapiens OX=9606 GN=MUC2 PE=1 SV=2	C(ITC[C])VPIAK||C(ITC[C])VPIAK|||||C(ITC[C])VPIAK	1||1|||||1	1.06||1.53|||||0.76	NA||NA|||||NA	1.11667	0.38812	3	3
Q9UQ80_87	PA2G4	PA2G4_HUMAN Proliferation-associated protein 2G4 OS=Homo sapiens OX=9606 GN=PA2G4 PE=1 SV=3	|||CVC(ITC[C])HFSPLK|C(ITC[C])HFSPLK|C(ITC[C])HFSPLK|C(ITC[C])HFSPLK|C(ITC[C])HFSPLK	|||1|1|1|3|2	|||0.82|1.05|1.29|1.23|1.19	|||NA|NA|NA|0.07371|0.0	1.116	0.18756	8	5
P00367_172	GLUD1	DHE3_HUMAN Glutamate dehydrogenase 1, mitochondrial OS=Homo sapiens OX=9606 GN=GLUD1 PE=1 SV=2	C(ITC[C])AVVDVPFGGAK|C(ITC[C])AVVDVPFGGAK|C(ITC[C])AVVDVPFGGAK|C(ITC[C])AVVDVPFGGAK|C(ITC[C])AVVDVPFGGAK|C(ITC[C])AVVDVPFGGAK|C(ITC[C])AVVDVPFGGAK|C(ITC[C])AVVDVPFGGAK	3|2|5|3|2|2|3|3	1.66|1.545|0.88|0.88|1.0|1.04|0.88|1.02	0.08327|0.20506|0.0658|0.05|0.12728|0.0|0.21939|0.07937	1.11312	0.31063	23	8
Q9UBQ5_87	EIF3K	EIF3K_HUMAN Eukaryotic translation initiation factor 3 subunit K OS=Homo sapiens OX=9606 GN=EIF3K PE=1 SV=1	C(ITC[C])MIDQAHQEER C(ITC[C])MIDQAHQEERPIR|C(ITC[C])MIDQAHQEERPIR|C(ITC[C])MIDQAHQEER C(ITC[C])MIDQAHQEERPIR|C(ITC[C])MIDQAHQEERPIR|C(ITC[C])MIDQAHQEERPIR|C(ITC[C])MIDQAHQEER C(ITC[C])MIDQAHQEERPIR||	2|3|3|3|1|6||	1.41|0.92|1.23|1.0|1.09|1.015||	1.06066|0.61025|0.25482|0.2571|NA|0.39148||	1.11083	0.18001	18	6
Q8NI27_931	THOC2	THOC2_HUMAN THO complex subunit 2 OS=Homo sapiens OX=9606 GN=THOC2 PE=1 SV=2	|C(ITC[C])TALQDK|C(ITC[C])TALQDK||||C(ITC[C])TALQDK|	|1|1||||1|	|0.8|1.08||||1.45|	|NA|NA||||NA|	1.11	0.32604	3	3
P68036_137	UBE2L3	UB2L3_HUMAN Ubiquitin-conjugating enzyme E2 L3 OS=Homo sapiens OX=9606 GN=UBE2L3 PE=1 SV=1	||||FC(ITC[C])KNAEEFTK||FC(ITC[C])KNAEEFTK|FC(ITC[C])KNAEEFTK	||||1||2|1	||||1.24||1.1|0.99	||||NA||0.11314|NA	1.11	0.1253	4	3
P17987_357	TCP1	TCPA_HUMAN T-complex protein 1 subunit alpha OS=Homo sapiens OX=9606 GN=TCP1 PE=1 SV=1	|C(ITC[C])DDELILIK|||C(ITC[C])DDELILIK|C(ITC[C])DDELILIK|C(ITC[C])DDELILIK|C(ITC[C])DDELILIK	|2|||2|1|1|3	|0.605|||1.02|0.84|1.6|1.47	|0.06364|||0.11314|NA|NA|0.50521	1.107	0.42002	9	5
P62241_100	RPS8	RS8_HUMAN 40S ribosomal protein S8 OS=Homo sapiens OX=9606 GN=RPS8 PE=1 SV=2	C(ITC[C])IVLIDSTPYR|C(ITC[C])IVLIDSTPYR|C(ITC[C])IVLIDSTPYR|C(ITC[C])IVLIDSTPYR|C(ITC[C])IVLIDSTPYR|C(ITC[C])IVLIDSTPYR|C(ITC[C])IVLIDSTPYR|C(ITC[C])IVLIDSTPYR	5|4|1|5|5|7|5|4	0.99|1.11|1.09|0.94|1.28|1.25|1.07|1.12	0.11234|0.03096|NA|0.10198|0.09338|0.19457|0.10854|0.05315	1.10625	0.11575	36	8
Q5UIP0_2274	RIF1	RIF1_HUMAN Telomere-associated protein RIF1 OS=Homo sapiens OX=9606 GN=RIF1 PE=1 SV=2	C(ITC[C])LISEMAK||C(ITC[C])LISEMAK|C(ITC[C])LISEMAK||C(ITC[C])LISEMAK||	1||1|2||1||	0.95||1.05|0.94||1.48||	NA||NA|0.33941||NA||	1.105	0.25489	5	4
P08134_107	RHOC	RHOC_HUMAN Rho-related GTP-binding protein RhoC OS=Homo sapiens OX=9606 GN=RHOC PE=1 SV=1	C(ITC[C])PNVPIILVGNK||C(ITC[C])PNVPIILVGNK|C(ITC[C])PNVPIILVGNK|C(ITC[C])PNVPIILVGNK|C(ITC[C])PNVPIILVGNK|C(ITC[C])PNVPIILVGNK|C(ITC[C])PNVPIILVGNK	3||4|4|5|6|7|5	1.35||1.22|1.055|1.06|1.08|1.0|0.97	0.19655||0.18475|0.2803|0.05273|0.19491|0.0884|0.10794	1.105	0.13395	34	7
P20810_413	CAST	ICAL_HUMAN Calpastatin OS=Homo sapiens OX=9606 GN=CAST PE=1 SV=4	|||C(ITC[C])SIQSAPPEPATLK|||C(ITC[C])SIQSAPPEPATLK|C(ITC[C])SIQSAPPEPATLK	|||2|||1|2	|||1.15|||1.12|1.045	|||0.0|||NA|0.13435	1.105	0.05408	5	3
Q7Z7K6_219	CENPV	CENPV_HUMAN Centromere protein V OS=Homo sapiens OX=9606 GN=CENPV PE=1 SV=1	C(ITC[C])GVQSFYTPR|C(ITC[C])GVQSFYTPR||C(ITC[C])GVQSFYTPR|C(ITC[C])GVQSFYTPR|C(ITC[C])GVQSFYTPR|C(ITC[C])GVQSFYTPR|C(ITC[C])GVQSFYTPR	3|3||1|1|1|1|1	0.82|0.75||1.6|1.47|1.02|0.95|1.12	0.05292|0.04041||NA|NA|NA|NA|NA	1.10429	0.32067	11	7
P62826_112	RAN	RAN_HUMAN GTP-binding nuclear protein Ran OS=Homo sapiens OX=9606 GN=RAN PE=1 SV=3	C(ITC[C])ENIPIVLCGNK|C(ITC[C])ENIPIVLCGNK|C(ITC[C])ENIPIVLCGNK|C(ITC[C])ENIPIVLCGNK|C(ITC[C])ENIPIVLCGNK|C(ITC[C])ENIPIVLCGNK|C(ITC[C])ENIPIVLCGNK|C(ITC[C])ENIPIVLCGNK	4|4|4|2|2|4|2|3	1.555|1.46|0.885|0.925|0.995|0.955|1.025|1.03	0.22897|0.17626|0.17146|0.00707|0.00707|0.06702|0.00707|0.03464	1.10375	0.25521	25	8
Q8N0U8_58	VKORC1L1	VKORL_HUMAN Vitamin K epoxide reductase complex subunit 1-like protein 1 OS=Homo sapiens OX=9606 GN=VKORC1L1 PE=1 SV=2	C(ITC[C])SAALASR||C(ITC[C])SAALASR||C(ITC[C])SAALASR|C(ITC[C])SAALASR|C(ITC[C])SAALASR|C(ITC[C])SAALASR	2||1||2|2|3|2	1.74||0.68||1.175|1.165|0.95|0.905	0.08485||NA||0.02121|0.02121|0.06658|0.00707	1.1025	0.36231	12	6
Q15269_158	PWP2	PWP2_HUMAN Periodic tryptophan protein 2 homolog OS=Homo sapiens OX=9606 GN=PWP2 PE=2 SV=2	C(ITC[C])FVVGSK|C(ITC[C])FVVGSK|C(ITC[C])FVVGSK|C(ITC[C])FVVGSK|C(ITC[C])FVVGSK|C(ITC[C])FVVGSK||C(ITC[C])FVVGSK	2|3|2|4|1|1||1	1.3|1.37|0.875|0.93|1.14|1.17||0.93	0.05657|0.08718|0.00707|0.12396|NA|NA||NA	1.10214	0.19485	14	7
P04080_3	CSTB	CYTB_HUMAN Cystatin-B OS=Homo sapiens OX=9606 GN=CSTB PE=1 SV=2	C(ITC[C])GAPSATQPATAETQHIADQVR|C(ITC[C])GAPSATQPATAETQHIADQVR|C(ITC[C])GAPSATQPATAETQHIADQVR|C(ITC[C])GAPSATQPATAETQHIADQVR|C(ITC[C])GAPSATQPATAETQHIADQVR|C(ITC[C])GAPSATQPATAETQHIADQVR|C(ITC[C])GAPSATQPATAETQHIADQVR|	3|4|3|1|1|2|1|	0.92|0.89|1.31|1.1|0.95|1.15|1.39|	0.00577|0.09092|0.04583|NA|NA|0.0|NA|	1.10143	0.19566	15	7
Q15185_40	PTGES3	TEBP_HUMAN Prostaglandin E synthase 3 OS=Homo sapiens OX=9606 GN=PTGES3 PE=1 SV=1	C(ITC[C])LGGSDNFK|C(ITC[C])LGGSDNFK|C(ITC[C])LGGSDNFK|C(ITC[C])LGGSDNFK|C(ITC[C])LGGSDNFK|C(ITC[C])LGGSDNFK|C(ITC[C])LGGSDNFK|C(ITC[C])LGGSDNFK	3|3|4|5|2|4|3|4	0.96|0.94|1.4|1.41|0.995|0.89|1.12|1.095	0.02517|0.03606|0.005|0.04324|0.10607|0.025|0.03464|0.02872	1.10125	0.20243	28	8
P40222_523	TXLNA	TXLNA_HUMAN Alpha-taxilin OS=Homo sapiens OX=9606 GN=TXLNA PE=1 SV=3	||C(ITC[C])YPGAPSTEASGQTGPQEPTSAR|C(ITC[C])YPGAPSTEASGQTGPQEPTSAR|C(ITC[C])YPGAPSTEASGQTGPQEPTSAR||C(ITC[C])YPGAPSTEASGQTGPQEPTSAR|C(ITC[C])YPGAPSTEASGQTGPQEPTSAR	||1|1|1||1|1	||1.13|1.26|0.96||1.07|1.08	||NA|NA|NA||NA|NA	1.1	0.10886	5	5
Q6KC79_1795	NIPBL	NIPBL_HUMAN Nipped-B-like protein OS=Homo sapiens OX=9606 GN=NIPBL PE=1 SV=2	C(ITC[C])LSEVVAVDPSILAR|C(ITC[C])LSEVVAVDPSILAR||||C(ITC[C])LSEVVAVDPSILAR|C(ITC[C])LSEVVAVDPSILAR|C(ITC[C])LSEVVAVDPSILAR	1|1||||2|1|4	1.36|0.92||||1.25|1.16|0.805	NA|NA||||0.0|NA|0.09815	1.099	0.23082	9	5
P63261_17	ACTG1	ACTG_HUMAN Actin, cytoplasmic 2 OS=Homo sapiens OX=9606 GN=ACTG1 PE=1 SV=1	||||VIDNGSGMC(ITC[C])K VIDNGSGMC(ITC[C])KAGFAGDDAPR|VIDNGSGMC(ITC[C])K VIDNGSGMC(ITC[C])KAGFAGDDAPR|VIDNGSGMC(ITC[C])K VIDNGSGMC(ITC[C])KAGFAGDDAPR|VIDNGSGMC(ITC[C])K VIDNGSGMC(ITC[C])KAGFAGDDAPR	||||3|4|6|5	||||1.14|0.92|1.185|1.15	||||0.18028|0.17289|0.16005|0.14536	1.09875	0.12072	18	4
Q9NSE4_364	IARS2	SYIM_HUMAN Isoleucine--tRNA ligase, mitochondrial OS=Homo sapiens OX=9606 GN=IARS2 PE=1 SV=2	||||C(ITC[C])SHPLIPDK|C(ITC[C])SHPLIPDK|C(ITC[C])SHPLIPDK|C(ITC[C])SHPLIPDK	||||2|1|3|2	||||1.41|0.94|0.82|1.22	||||0.01414|NA|0.40415|0.0	1.0975	0.26738	8	4
Q9BVI4_392	NOC4L	NOC4L_HUMAN Nucleolar complex protein 4 homolog OS=Homo sapiens OX=9606 GN=NOC4L PE=1 SV=1	||||IC(ITC[C])NLLR LC(ITC[C])NILR|IC(ITC[C])NLLR|IC(ITC[C])NLLR|IC(ITC[C])NLLR	||||2|2|1|1	||||1.03|1.37|0.94|1.05	||||0.01414|0.0|NA|NA	1.0975	0.18786	6	4
O75530_401	EED	EED_HUMAN Polycomb protein EED OS=Homo sapiens OX=9606 GN=EED PE=1 SV=2	C(ITC[C])TTLTHHK|C(ITC[C])TTLTHHK|C(ITC[C])TTLTHHK|C(ITC[C])TTLTHHK||||	3|1|1|1||||	1.09|1.35|0.95|1.0||||	0.01155|NA|NA|NA||||	1.0975	0.17802	6	4
Q5T8P6_53	RBM26	RBM26_HUMAN RNA-binding protein 26 OS=Homo sapiens OX=9606 GN=RBM26 PE=1 SV=3	|C(ITC[C])IDQLDVFLQK||C(ITC[C])IDQLDVFLQK|C(ITC[C])IDQLDVFLQK|C(ITC[C])IDQLDVFLQK|C(ITC[C])IDQLDVFLQK|	|1||1|2|2|2|	|1.43||1.51|0.88|0.92|0.74|	|NA||NA|0.0|0.0|0.0|	1.096	0.34904	8	5
Q9C0C9_341	UBE2O	UBE2O_HUMAN (E3-independent) E2 ubiquitin-conjugating enzyme OS=Homo sapiens OX=9606 GN=UBE2O PE=1 SV=3	C(ITC[C])FDHAQR|C(ITC[C])FDHAQR|C(ITC[C])FDHAQR|C(ITC[C])FDHAQR|C(ITC[C])FDHAQR|C(ITC[C])FDHAQR|C(ITC[C])FDHAQR|C(ITC[C])FDHAQR	1|1|1|1|2|1|1|1	1.15|0.76|1.07|0.91|1.705|1.19|1.12|0.86	NA|NA|NA|NA|0.00707|NA|NA|NA	1.09563	0.2896	9	8
Q9NVX0_118	HAUS2	HAUS2_HUMAN HAUS augmin-like complex subunit 2 OS=Homo sapiens OX=9606 GN=HAUS2 PE=1 SV=1	||C(ITC[C])QENLPIEAVYHR|C(ITC[C])QENLPIEAVYHR|C(ITC[C])QENLPIEAVYHR|C(ITC[C])QENLPIEAVYHR||	||1|1|1|2||	||0.96|0.79|1.05|1.58||	||NA|NA|NA|0.0||	1.095	0.34083	5	4
Q9UJX4_482	ANAPC5	APC5_HUMAN Anaphase-promoting complex subunit 5 OS=Homo sapiens OX=9606 GN=ANAPC5 PE=1 SV=2	||C(ITC[C])FAAASEVLK|C(ITC[C])FAAASEVLK|||C(ITC[C])FAAASEVLK|C(ITC[C])FAAASEVLK	||1|1|||1|1	||1.46|0.91|||0.99|1.02	||NA|NA|||NA|NA	1.095	0.24772	4	4
Q13547_284	HDAC1	HDAC1_HUMAN Histone deacetylase 1 OS=Homo sapiens OX=9606 GN=HDAC1 PE=1 SV=1	C(ITC[C])VEFVK|C(ITC[C])VEFVK|C(ITC[C])VEFVK|C(ITC[C])VEFVK||||C(ITC[C])VEFVK	1|3|2|1||||1	1.01|1.06|1.09|1.17||||1.14	NA|0.03786|0.01414|NA||||NA	1.094	0.06348	8	5
P57737_695	CORO7	CORO7_HUMAN Coronin-7 OS=Homo sapiens OX=9606 GN=CORO7 PE=1 SV=2	C(ITC[C])LLVSGFDSQSER|C(ITC[C])LLVSGFDSQSER|C(ITC[C])LLVSGFDSQSER|C(ITC[C])LLVSGFDSQSER||||C(ITC[C])LLVSGFDSQSER	1|1|1|3||||1	1.04|1.15|1.09|1.16||||1.03	NA|NA|NA|0.14572||||NA	1.094	0.06025	7	5
Q86Y56_555	DNAAF5	DAAF5_HUMAN Dynein assembly factor 5, axonemal OS=Homo sapiens OX=9606 GN=DNAAF5 PE=1 SV=4	|C(ITC[C])QDLYR|||C(ITC[C])QDLYR|||C(ITC[C])QDLYR	|1|||1|||1	|1.21|||1.21|||0.86	|NA|||NA|||NA	1.09333	0.20207	3	3
Q9NYK5_180	MRPL39	RM39_HUMAN 39S ribosomal protein L39, mitochondrial OS=Homo sapiens OX=9606 GN=MRPL39 PE=1 SV=3	C(ITC[C])YDVVLDSK||C(ITC[C])YDVVLDSK||||C(ITC[C])YDVVLDSK|C(ITC[C])YDVVLDSK	1||1||||2|1	1.3||0.99||||0.955|1.12	NA||NA||||0.09192|NA	1.09125	0.15622	5	4
O00139_406	KIF2A	KIF2A_HUMAN Kinesin-like protein KIF2A OS=Homo sapiens OX=9606 GN=KIF2A PE=1 SV=3	|C(ITC[C])VEDVLK|C(ITC[C])VEDVLK|C(ITC[C])VEDVLK|C(ITC[C])VEDVLK|C(ITC[C])VEDVLK|C(ITC[C])VEDVLK|C(ITC[C])VEDVLK	|3|4|5|1|4|5|3	|0.99|1.29|1.05|1.07|1.085|1.04|1.11	|0.02309|0.40841|0.14571|NA|0.06557|0.06419|0.1464	1.09071	0.09567	25	7
P09211_48	GSTP1	GSTP1_HUMAN Glutathione S-transferase P OS=Homo sapiens OX=9606 GN=GSTP1 PE=1 SV=2	C(ITC[C])LYGQLPK|C(ITC[C])LYGQLPK|C(ITC[C])LYGQLPK|C(ITC[C])LYGQLPK|C(ITC[C])LYGQLPK|C(ITC[C])LYGQLPK|C(ITC[C])LYGQLPK|C(ITC[C])LYGQLPK	3|5|4|6|4|4|7|4	0.81|0.79|1.475|1.54|0.855|0.86|1.22|1.175	0.02646|0.01414|0.11266|0.15947|0.06551|0.0|0.10746|0.04717	1.09063	0.30505	37	8
P18621_144	RPL17	RL17_HUMAN 60S ribosomal protein L17 OS=Homo sapiens OX=9606 GN=RPL17 PE=1 SV=3	C(ITC[C])HIEMILTEK|C(ITC[C])HIEMILTEK|C(ITC[C])HIEMILTEK|C(ITC[C])HIEMILTEK|C(ITC[C])HIEMILTEK|C(ITC[C])HIEMILTEK|C(ITC[C])HIEMILTEK|C(ITC[C])HIEMILTEK	9|4|4|4|4|4|10|8	0.64|0.815|1.355|0.985|1.115|1.055|1.4|1.36	0.22394|0.14491|0.24391|0.23452|0.16783|0.15546|0.13218|0.11976	1.09062	0.27522	47	8
P17812_362	CTPS1	PYRG1_HUMAN CTP synthase 1 OS=Homo sapiens OX=9606 GN=CTPS1 PE=1 SV=2	||C(ITC[C])SAHGVLVPGGFGVR|C(ITC[C])SAHGVLVPGGFGVR|C(ITC[C])SAHGVLVPGGFGVR|C(ITC[C])SAHGVLVPGGFGVR|C(ITC[C])SAHGVLVPGGFGVR|C(ITC[C])SAHGVLVPGGFGVR	||2|2|1|1|2|1	||1.04|0.8|0.84|0.97|1.54|1.35	||0.09899|0.29698|NA|NA|0.0|NA	1.09	0.29448	9	6
P15880_188	RPS2	RS2_HUMAN 40S ribosomal protein S2 OS=Homo sapiens OX=9606 GN=RPS2 PE=1 SV=2	C(ITC[C])GSVLVR|C(ITC[C])GSVLVR|C(ITC[C])GSVLVR|C(ITC[C])GSVLVR|C(ITC[C])GSVLVR|C(ITC[C])GSVLVR|C(ITC[C])GSVLVR|C(ITC[C])GSVLVR	7|7|4|3|1|4|2|3	0.95|0.97|0.87|0.93|1.28|1.355|1.155|1.21	0.09861|0.03416|0.045|0.15133|NA|0.06801|0.00707|0.08083	1.09	0.18242	31	8
Q92794_508	KAT6A	KAT6A_HUMAN Histone acetyltransferase KAT6A OS=Homo sapiens OX=9606 GN=KAT6A PE=1 SV=2	|C(ITC[C])PSVIEFGK|C(ITC[C])PSVIEFGK|||C(ITC[C])PSVIEFGK|C(ITC[C])PSVIEFGK|C(ITC[C])PSVIEFGK	|1|1|||1|1|1	|1.35|0.97|||1.09|1.02|1.02	|NA|NA|||NA|NA|NA	1.09	0.15149	5	5
Q5VWZ2_12	LYPLAL1	LYPL1_HUMAN Lysophospholipase-like protein 1 OS=Homo sapiens OX=9606 GN=LYPLAL1 PE=1 SV=3	C(ITC[C])IVSPAGR|C(ITC[C])IVSPAGR|C(ITC[C])IVSPAGR|C(ITC[C])IVSPAGR|C(ITC[C])IVSPAGR|C(ITC[C])IVSPAGR||C(ITC[C])IVSPAGR	4|5|2|4|5|2||1	1.05|1.19|1.0|1.13|0.86|1.3||1.1	0.05188|0.1444|0.0|0.05447|0.18199|0.2687||NA	1.09	0.14048	23	7
P62829_125	RPL23	RL23_HUMAN 60S ribosomal protein L23 OS=Homo sapiens OX=9606 GN=RPL23 PE=1 SV=1	C(ITC[C])ADLWPR|C(ITC[C])ADLWPR|C(ITC[C])ADLWPR|C(ITC[C])ADLWPR|C(ITC[C])ADLWPR|C(ITC[C])ADLWPR|C(ITC[C])ADLWPR|C(ITC[C])ADLWPR	14|9|10|8|13|13|13|15	1.2|1.21|1.0|1.0|1.09|1.11|1.02|1.09	0.07488|0.13986|0.19465|0.18055|0.24507|0.2041|0.11784|0.09694	1.09	0.08281	95	8
P63167_24	DYNLL1	DYL1_HUMAN Dynein light chain 1, cytoplasmic OS=Homo sapiens OX=9606 GN=DYNLL1 PE=1 SV=1	C(ITC[C])ATQALEK|C(ITC[C])ATQALEK|C(ITC[C])ATQALEK|C(ITC[C])ATQALEK|C(ITC[C])ATQALEK|C(ITC[C])ATQALEK|C(ITC[C])ATQALEK|C(ITC[C])ATQALEK	2|1|1|2|3|3|1|2	1.745|1.55|0.85|0.795|0.91|0.96|0.96|0.945	0.2192|NA|NA|0.02121|0.07234|0.01528|NA|0.07778	1.08937	0.35304	15	8
Q00610_1102	CLTC	CLH1_HUMAN Clathrin heavy chain 1 OS=Homo sapiens OX=9606 GN=CLTC PE=1 SV=5	C(ITC[C])NEPAVWSQLAK|C(ITC[C])NEPAVWSQLAK|C(ITC[C])NEPAVWSQLAK|C(ITC[C])NEPAVWSQLAK|C(ITC[C])NEPAVWSQLAK|C(ITC[C])NEPAVWSQLAK|C(ITC[C])NEPAVWSQLAK|C(ITC[C])NEPAVWSQLAK	4|6|2|2|3|1|2|2	1.135|1.13|1.03|1.205|0.98|1.09|1.095|1.05	0.07853|0.06585|0.0|0.10607|0.12097|NA|0.23335|0.0	1.08937	0.06987	22	8
Q9NW13_392	RBM28	RBM28_HUMAN RNA-binding protein 28 OS=Homo sapiens OX=9606 GN=RBM28 PE=1 SV=3	C(ITC[C])LLAASPENEAGGLK|C(ITC[C])LLAASPENEAGGLK|C(ITC[C])LLAASPENEAGGLK|C(ITC[C])LLAASPENEAGGLK||C(ITC[C])LLAASPENEAGGLK|C(ITC[C])LLAASPENEAGGLK|C(ITC[C])LLAASPENEAGGLK	3|6|3|3||1|1|2	0.61|0.755|1.22|1.27||0.89|1.47|1.41	0.05508|0.116|0.00577|0.17898||NA|NA|0.08485	1.08929	0.33633	19	7
Q96DT7_347	ZBTB10	ZBT10_HUMAN Zinc finger and BTB domain-containing protein 10 OS=Homo sapiens OX=9606 GN=ZBTB10 PE=1 SV=2	|C(ITC[C])YQLLR||||C(ITC[C])YQLLR|C(ITC[C])YQLLR|C(ITC[C])YQLLR	|1||||2|1|1	|1.27||||0.935|1.11|1.04	|NA||||0.07778|NA|NA	1.08875	0.14062	5	4
Q9H9J2_53	MRPL44	RM44_HUMAN 39S ribosomal protein L44, mitochondrial OS=Homo sapiens OX=9606 GN=MRPL44 PE=1 SV=1	C(ITC[C])PPPPVR|C(ITC[C])PPPPVR|C(ITC[C])PPPPVR|C(ITC[C])PPPPVR|C(ITC[C])PPPPVR|C(ITC[C])PPPPVR|C(ITC[C])PPPPVR|C(ITC[C])PPPPVR	4|9|5|2|4|3|2|3	0.93|0.82|1.37|1.26|1.115|0.98|1.16|1.07	0.11547|0.119|0.11|0.08485|0.10472|0.13|0.11314|0.01155	1.08813	0.1788	32	8
P11413_294	G6PD	G6PD_HUMAN Glucose-6-phosphate 1-dehydrogenase OS=Homo sapiens OX=9606 GN=G6PD PE=1 SV=4	C(ITC[C])ISEVQANNVVLGQYVGNPDGEGEATK||C(ITC[C])ISEVQANNVVLGQYVGNPDGEGEATK|C(ITC[C])ISEVQANNVVLGQYVGNPDGEGEATK|||C(ITC[C])ISEVQANNVVLGQYVGNPDGEGEATK|C(ITC[C])ISEVQANNVVLGQYVGNPDGEGEATK	1||2|1|||1|1	1.24||1.24|0.79|||1.15|1.02	NA||0.22627|NA|||NA|NA	1.088	0.18939	6	5
P10809_447	HSPD1	CH60_HUMAN 60 kDa heat shock protein, mitochondrial OS=Homo sapiens OX=9606 GN=HSPD1 PE=1 SV=2	C(ITC[C])IPALDSLTPANEDQK|C(ITC[C])IPALDSLTPANEDQK|C(ITC[C])IPALDSLTPANEDQK|C(ITC[C])IPALDSLTPANEDQK|C(ITC[C])IPALDSLTPANEDQK|C(ITC[C])IPALDSLTPANEDQK|C(ITC[C])IPALDSLTPANEDQK|C(ITC[C])IPALDSLTPANEDQK	50|54|43|43|32|31|35|34	1.5|1.435|0.96|0.99|0.985|0.96|0.92|0.95	0.45839|0.92168|0.10173|0.19422|0.11978|0.10358|0.14697|0.14573	1.0875	0.23616	322	8
O43491_867	EPB41L2	E41L2_HUMAN Band 4.1-like protein 2 OS=Homo sapiens OX=9606 GN=EPB41L2 PE=1 SV=1	||C(ITC[C])SEPPVVK|C(ITC[C])SEPPVVK||C(ITC[C])SEPPVVK|C(ITC[C])SEPPVVK|	||1|1||1|2|	||1.05|1.17||1.15|0.98|	||NA|NA||NA|0.01414|	1.0875	0.08884	5	4
Q13200_251	PSMD2	PSMD2_HUMAN 26S proteasome non-ATPase regulatory subunit 2 OS=Homo sapiens OX=9606 GN=PSMD2 PE=1 SV=3	C(ITC[C])ALGVFR|C(ITC[C])ALGVFR|C(ITC[C])ALGVFR|C(ITC[C])ALGVFR|C(ITC[C])ALGVFR|C(ITC[C])ALGVFR|C(ITC[C])ALGVFR|	2|2|2|3|1|1|2|	1.745|1.525|0.705|0.71|1.03|1.07|0.81|	0.07778|0.27577|0.0495|0.02309|NA|NA|0.0|	1.085	0.40684	13	7
O43660_338	PLRG1	PLRG1_HUMAN Pleiotropic regulator 1 OS=Homo sapiens OX=9606 GN=PLRG1 PE=1 SV=1	C(ITC[C])QAAEPQIITGSHDTTIR|C(ITC[C])QAAEPQIITGSHDTTIR|C(ITC[C])QAAEPQIITGSHDTTIR|C(ITC[C])QAAEPQIITGSHDTTIR|C(ITC[C])QAAEPQIITGSHDTTIR||C(ITC[C])QAAEPQIITGSHDTTIR|C(ITC[C])QAAEPQIITGSHDTTIR	2|6|1|1|2||3|1	1.475|1.595|0.68|0.73|1.25||0.92|0.94	0.0495|0.21491|NA|NA|0.42426||0.04619|NA	1.08429	0.36003	16	7
Q8WXD5_144	GEMIN6	GEMI6_HUMAN Gem-associated protein 6 OS=Homo sapiens OX=9606 GN=GEMIN6 PE=1 SV=1	||C(ITC[C])SSSNEIILSR|||C(ITC[C])SSSNEIILSR||C(ITC[C])SSSNEIILSR	||1|||1||1	||1.25|||1.1||0.9	||NA|||NA||NA	1.08333	0.17559	3	3
P35221_526	CTNNA1	CTNA1_HUMAN Catenin alpha-1 OS=Homo sapiens OX=9606 GN=CTNNA1 PE=1 SV=1	C(ITC[C])VIALQEK|C(ITC[C])VIALQEK|C(ITC[C])VIALQEK|C(ITC[C])VIALQEK||||C(ITC[C])VIALQEK	1|2|3|2||||1	1.76|1.245|0.82|0.75||||0.84	NA|0.13435|0.08505|0.11314||||NA	1.083	0.42535	9	5
P55212_87	CASP6	CASP6_HUMAN Caspase-6 OS=Homo sapiens OX=9606 GN=CASP6 PE=1 SV=2	C(ITC[C])FNDLK|C(ITC[C])FNDLK|C(ITC[C])FNDLK|C(ITC[C])FNDLK|C(ITC[C])FNDLK|C(ITC[C])FNDLK|C(ITC[C])FNDLK|C(ITC[C])FNDLK	1|2|1|3|3|4|2|1	1.7|1.31|0.8|0.8|1.06|1.21|1.01|0.76	NA|0.16971|NA|0.05508|0.07506|0.09639|0.05657|NA	1.08125	0.32042	17	8
Q00610_491	CLTC	CLH1_HUMAN Clathrin heavy chain 1 OS=Homo sapiens OX=9606 GN=CLTC PE=1 SV=5	C(ITC[C])FAETGQVQK|C(ITC[C])FAETGQVQK|C(ITC[C])FAETGQVQK|C(ITC[C])FAETGQVQK|C(ITC[C])FAETGQVQK|C(ITC[C])FAETGQVQK|C(ITC[C])FAETGQVQK|C(ITC[C])FAETGQVQK	1|2|2|1|4|3|4|3	1.06|0.825|1.655|1.33|0.84|0.76|1.06|1.11	NA|0.10607|0.07778|NA|0.025|0.02309|0.02|0.26851	1.08	0.29757	20	8
Q3SY69_108	ALDH1L2	AL1L2_HUMAN Mitochondrial 10-formyltetrahydrofolate dehydrogenase OS=Homo sapiens OX=9606 GN=ALDH1L2 PE=1 SV=2	|C(ITC[C])TQFIPMDIIDSPK|C(ITC[C])TQFIPMDIIDSPK||C(ITC[C])TQFIPMDIIDSPK||C(ITC[C])TQFIPMDIIDSPK|C(ITC[C])TQFIPMDIIDSPK	|1|3||3||3|3	|0.78|1.11||1.12||1.38|1.01	|NA|0.18028||0.14154||0.15308|0.17321	1.08	0.21645	13	5
Q9H582_202	ZNF644	ZN644_HUMAN Zinc finger protein 644 OS=Homo sapiens OX=9606 GN=ZNF644 PE=1 SV=2	||C(ITC[C])DIQNSVGSNIK|C(ITC[C])DIQNSVGSNIK||||C(ITC[C])DIQNSVGSNIK	||2|1||||2	||1.1|1.02||||1.12	||0.0|NA||||0.16971	1.08	0.05292	5	3
P52294_469	KPNA1	IMA5_HUMAN Importin subunit alpha-5 OS=Homo sapiens OX=9606 GN=KPNA1 PE=1 SV=3	C(ITC[C])ALIEEAYGLDK||C(ITC[C])ALIEEAYGLDK||||C(ITC[C])ALIEEAYGLDK|C(ITC[C])ALIEEAYGLDK	2||3||||1|2	1.64||0.91||||0.8|0.965	0.05657||0.07506||||NA|0.06364	1.07875	0.3804	8	4
Q96RU3_248	FNBP1	FNBP1_HUMAN Formin-binding protein 1 OS=Homo sapiens OX=9606 GN=FNBP1 PE=1 SV=2	C(ITC[C])LDGIVK|C(ITC[C])LDGIVK|C(ITC[C])LDGIVK|C(ITC[C])LDGIVK|||C(ITC[C])LDGIVK|C(ITC[C])LDGIVK	1|1|1|1|||2|2	1.24|1.11|0.71|1.16|||1.07|1.18	NA|NA|NA|NA|||0.16971|0.08485	1.07833	0.18968	8	6
P49327_1471	FASN	FAS_HUMAN Fatty acid synthase OS=Homo sapiens OX=9606 GN=FASN PE=1 SV=3	C(ITC[C])VLLSNLSSTSHVPEVDPGSAELQK|C(ITC[C])VLLSNLSSTSHVPEVDPGSAELQK|C(ITC[C])VLLSNLSSTSHVPEVDPGSAELQK|C(ITC[C])VLLSNLSSTSHVPEVDPGSAELQK|C(ITC[C])VLLSNLSSTSHVPEVDPGSAELQK||C(ITC[C])VLLSNLSSTSHVPEVDPGSAELQK|	4|4|2|3|2||2|	1.0|1.04|1.16|1.08|1.16||1.03|	0.02986|0.30044|0.04243|0.15885|0.0||0.0|	1.07833	0.06824	17	6
P09429_106	HMGB1	HMGB1_HUMAN High mobility group protein B1 OS=Homo sapiens OX=9606 GN=HMGB1 PE=1 SV=3	C(ITC[C])SEYRPK||C(ITC[C])SEYRPK|||C(ITC[C])SEYRPK||	1||1|||1||	1.33||1.09|||0.81||	NA||NA|||NA||	1.07667	0.26026	3	3
Q96J01_25	THOC3	THOC3_HUMAN THO complex subunit 3 OS=Homo sapiens OX=9606 GN=THOC3 PE=1 SV=1	C(ITC[C])SVSSGPSR||C(ITC[C])SVSSGPSR|C(ITC[C])SVSSGPSR|C(ITC[C])SVSSGPSR|C(ITC[C])SVSSGPSR|C(ITC[C])SVSSGPSR|C(ITC[C])SVSSGPSR	2||1|1|1|2|2|2	1.4||0.97|0.98|1.06|1.135|1.0|0.99	0.15556||NA|NA|NA|0.23335|0.0|0.01414	1.07643	0.15402	11	7
O75533_1035	SF3B1	SF3B1_HUMAN Splicing factor 3B subunit 1 OS=Homo sapiens OX=9606 GN=SF3B1 PE=1 SV=3	C(ITC[C])IDLVGR|C(ITC[C])IDLVGR|C(ITC[C])IDLVGR|C(ITC[C])IDLVGR|C(ITC[C])IDLVGR|C(ITC[C])IDLVGR|C(ITC[C])IDLVGR|C(ITC[C])IDLVGR	4|4|6|8|4|4|7|5	1.735|1.67|0.7|0.735|0.925|1.015|0.89|0.94	0.23301|0.24649|0.10944|0.0768|0.03862|0.08846|0.14876|0.14025	1.07625	0.40078	42	8
P31040_305	SDHA	SDHA_HUMAN Succinate dehydrogenase [ubiquinone] flavoprotein subunit, mitochondrial OS=Homo sapiens OX=9606 GN=SDHA PE=1 SV=2	||||C(ITC[C])LITEGCR|C(ITC[C])LITEGCR|C(ITC[C])LITEGCR|C(ITC[C])LITEGCR	||||1|3|1|2	||||1.52|0.83|0.83|1.125	||||NA|0.15588|NA|0.09192	1.07625	0.32689	7	4
Q9NR30_418	DDX21	DDX21_HUMAN Nucleolar RNA helicase 2 OS=Homo sapiens OX=9606 GN=DDX21 PE=1 SV=5	C(ITC[C])HWTQR|C(ITC[C])HWTQR|C(ITC[C])HWTQR|C(ITC[C])HWTQR|C(ITC[C])HWTQR|C(ITC[C])HWTQR|C(ITC[C])HWTQR|C(ITC[C])HWTQR	4|4|4|2|1|1|2|2	0.49|0.51|1.325|0.835|1.46|1.2|1.57|1.21	0.0789|0.16381|0.65711|0.17678|NA|NA|0.07071|0.01414	1.075	0.41553	20	8
O75643_331	SNRNP200	U520_HUMAN U5 small nuclear ribonucleoprotein 200 kDa helicase OS=Homo sapiens OX=9606 GN=SNRNP200 PE=1 SV=2	C(ITC[C])TLLASAQSEAEK|C(ITC[C])TLLASAQSEAEK|C(ITC[C])TLLASAQSEAEK|C(ITC[C])TLLASAQSEAEK|C(ITC[C])TLLASAQSEAEK||C(ITC[C])TLLASAQSEAEK|C(ITC[C])TLLASAQSEAEK	2|1|2|1|1||2|3	0.885|0.77|1.37|1.21|1.0||1.17|1.12	0.14849|NA|0.0|NA|NA||0.2687|0.15044	1.075	0.20455	12	7
P31930_380	UQCRC1	QCR1_HUMAN Cytochrome b-c1 complex subunit 1, mitochondrial OS=Homo sapiens OX=9606 GN=UQCRC1 PE=1 SV=3	C(ITC[C])TSATESEVAR|C(ITC[C])TSATESEVAR|||C(ITC[C])TSATESEVAR|||	2|1|||1|||	1.305|0.92|||1.0|||	0.51619|NA|||NA|||	1.075	0.20316	4	3
P18754_280	RCC1	RCC1_HUMAN Regulator of chromosome condensation OS=Homo sapiens OX=9606 GN=RCC1 PE=1 SV=1	C(ITC[C])FIPQNLTSFK|C(ITC[C])FIPQNLTSFK||C(ITC[C])FIPQNLTSFK||C(ITC[C])FIPQNLTSFK||C(ITC[C])FIPQNLTSFK	2|1||1||1||2	0.915|1.01||1.05||1.18||1.22	0.09192|NA||NA||NA||0.0	1.075	0.125	7	5
P23378_225	GLDC	GCSP_HUMAN Glycine dehydrogenase (decarboxylating), mitochondrial OS=Homo sapiens OX=9606 GN=GLDC PE=1 SV=2	|C(ITC[C])HPQTIAVVQTR||C(ITC[C])HPQTIAVVQTR||C(ITC[C])HPQTIAVVQTR|C(ITC[C])HPQTIAVVQTR|C(ITC[C])HPQTIAVVQTR	|1||1||1|2|1	|1.14||1.09||0.99|0.95|1.2	|NA||NA||NA|0.0|NA	1.074	0.10359	6	5
P14866_404	HNRNPL	HNRPL_HUMAN Heterogeneous nuclear ribonucleoprotein L OS=Homo sapiens OX=9606 GN=HNRNPL PE=1 SV=2	C(ITC[C])LYGNVEK|C(ITC[C])LYGNVEK|C(ITC[C])LYGNVEK|C(ITC[C])LYGNVEK|C(ITC[C])LYGNVEK|C(ITC[C])LYGNVEK|C(ITC[C])LYGNVEK|C(ITC[C])LYGNVEK	5|6|6|4|5|3|6|2	0.97|1.11|1.09|1.065|1.01|1.0|1.2|1.145	0.09884|0.08704|0.10386|0.02944|0.01517|0.08083|0.11185|0.17678	1.07375	0.07832	37	8
Q14204_4556	DYNC1H1	DYHC1_HUMAN Cytoplasmic dynein 1 heavy chain 1 OS=Homo sapiens OX=9606 GN=DYNC1H1 PE=1 SV=5	||||C(ITC[C])SFGVTGLK||C(ITC[C])SFGVTGLK|C(ITC[C])SFGVTGLK	||||1||1|1	||||0.69||1.07|1.46	||||NA||NA|NA	1.07333	0.38501	3	3
Q8NEC7_335	GSTCD	GSTCD_HUMAN Glutathione S-transferase C-terminal domain-containing protein OS=Homo sapiens OX=9606 GN=GSTCD PE=1 SV=2	|||C(ITC[C])GIQFLHLPK|C(ITC[C])GIQFLHLPK||C(ITC[C])GIQFLHLPK|	|||1|1||1|	|||1.45|0.97||0.8|	|||NA|NA||NA|	1.07333	0.3371	3	3
P30048_60	PRDX3	PRDX3_HUMAN Thioredoxin-dependent peroxide reductase, mitochondrial OS=Homo sapiens OX=9606 GN=PRDX3 PE=1 SV=3	|||C(ITC[C])HAPAVTQHAPYFK|C(ITC[C])HAPAVTQHAPYFK|C(ITC[C])HAPAVTQHAPYFK||	|||1|1|2||	|||1.12|1.06|1.04||	|||NA|NA|0.07071||	1.07333	0.04163	4	3
P46060_141	RANGAP1	RAGP1_HUMAN Ran GTPase-activating protein 1 OS=Homo sapiens OX=9606 GN=RANGAP1 PE=1 SV=1	||C(ITC[C])FTLQELK|C(ITC[C])FTLQELK|||C(ITC[C])FTLQELK|C(ITC[C])FTLQELK	||2|1|||1|1	||1.07|1.12|||1.07|1.03	||0.01414|NA|||NA|NA	1.0725	0.03686	5	4
Q9NR30_291	DDX21	DDX21_HUMAN Nucleolar RNA helicase 2 OS=Homo sapiens OX=9606 GN=DDX21 PE=1 SV=5	C(ITC[C])FYGGTPYGGQFER|||||C(ITC[C])FYGGTPYGGQFER|C(ITC[C])FYGGTPYGGQFER|C(ITC[C])FYGGTPYGGQFER	2|||||1|2|1	1.135|||||0.9|1.15|1.1	0.09192|||||NA|0.0|NA	1.07125	0.11607	6	4
Q8IX01_417	SUGP2	SUGP2_HUMAN SURP and G-patch domain-containing protein 2 OS=Homo sapiens OX=9606 GN=SUGP2 PE=1 SV=2	C(ITC[C])FFEIIKPFDK||||||C(ITC[C])FFEIIKPFDK|C(ITC[C])FFEIIKPFDK	1||||||1|1	1.49||||||0.94|0.78	NA||||||NA|NA	1.07	0.37242	3	3
Q14204_4570	DYNC1H1	DYHC1_HUMAN Cytoplasmic dynein 1 heavy chain 1 OS=Homo sapiens OX=9606 GN=DYNC1H1 PE=1 SV=5	|LQGATC(ITC[C])NNNK||LQGATC(ITC[C])NNNK|LQGATC(ITC[C])NNNK|LQGATC(ITC[C])NNNK||	|1||2|1|2||	|1.41||0.8|0.91|1.16||	|NA||0.02828|NA|0.0||	1.07	0.27215	6	4
Q149N8_489	SHPRH	SHPRH_HUMAN E3 ubiquitin-protein ligase SHPRH OS=Homo sapiens OX=9606 GN=SHPRH PE=1 SV=2	|C(ITC[C])LIFEGLVK|||||C(ITC[C])LIFEGLVK|C(ITC[C])LIFEGLVK	|1|||||1|1	|0.95|||||0.89|1.37	|NA|||||NA|NA	1.07	0.26153	3	3
O95260_79	ATE1	ATE1_HUMAN Arginyl-tRNA--protein transferase 1 OS=Homo sapiens OX=9606 GN=ATE1 PE=1 SV=2	C(ITC[C])RPLQFQPSK||C(ITC[C])RPLQFQPSK|C(ITC[C])RPLQFQPSK||||	1||1|2||||	1.06||1.18|0.97||||	NA||NA|0.08485||||	1.07	0.10536	4	3
O60231_37	DHX16	DHX16_HUMAN Pre-mRNA-splicing factor ATP-dependent RNA helicase DHX16 OS=Homo sapiens OX=9606 GN=DHX16 PE=1 SV=2	C(ITC[C])TSAEEFVQR|C(ITC[C])TSAEEFVQR|C(ITC[C])TSAEEFVQR|C(ITC[C])TSAEEFVQR|C(ITC[C])TSAEEFVQR|C(ITC[C])TSAEEFVQR||C(ITC[C])TSAEEFVQR	3|2|3|2|3|1||2	1.07|1.03|1.01|1.04|1.11|0.99||1.24	0.06|0.0|0.02887|0.0|0.07095|NA||0.0	1.07	0.08466	16	7
P26641_266	EEF1G	EF1G_HUMAN Elongation factor 1-gamma OS=Homo sapiens OX=9606 GN=EEF1G PE=1 SV=3	C(ITC[C])EQALAAEPK|C(ITC[C])EQALAAEPK|C(ITC[C])EQALAAEPK|C(ITC[C])EQALAAEPK|C(ITC[C])EQALAAEPK|C(ITC[C])EQALAAEPK|C(ITC[C])EQALAAEPK|C(ITC[C])EQALAAEPK	6|6|3|4|5|1|3|3	0.565|0.57|1.51|1.515|1.01|0.81|1.1|1.47	0.04179|0.03777|0.03512|0.02449|0.47315|NA|0.03055|0.24434	1.06875	0.40156	31	8
Q9GZR2_382	REXO4	REXO4_HUMAN RNA exonuclease 4 OS=Homo sapiens OX=9606 GN=REXO4 PE=1 SV=2	C(ITC[C])SIQDAQAAMR|||C(ITC[C])SIQDAQAAMR|||C(ITC[C])SIQDAQAAMR|C(ITC[C])SIQDAQAAMR	1|||2|||2|2	1.18|||1.16|||1.055|0.875	NA|||0.09899|||0.17678|0.00707	1.0675	0.13955	7	4
Q5MNZ6_63	WDR45B	WIPI3_HUMAN WD repeat domain phosphoinositide-interacting protein 3 OS=Homo sapiens OX=9606 GN=WDR45B PE=1 SV=2	C(ITC[C])NYLALVGGGK|C(ITC[C])NYLALVGGGK|C(ITC[C])NYLALVGGGK|C(ITC[C])NYLALVGGGK|C(ITC[C])NYLALVGGGK|C(ITC[C])NYLALVGGGK|C(ITC[C])NYLALVGGGK|C(ITC[C])NYLALVGGGK	1|1|4|5|5|3|4|1	0.58|0.92|1.175|1.3|1.15|1.19|1.18|1.04	NA|NA|0.36973|0.24775|0.11032|0.18475|0.23152|NA	1.06688	0.22686	24	8
P41227_17	NAA10	NAA10_HUMAN N-alpha-acetyltransferase 10 OS=Homo sapiens OX=9606 GN=NAA10 PE=1 SV=1	||C(ITC[C])NLLCLPENYQMK|||C(ITC[C])NLLCLPENYQMK||C(ITC[C])NLLCLPENYQMK	||1|||1||1	||1.53|||0.76||0.91	||NA|||NA||NA	1.06667	0.40821	3	3
Q9P0K8_42	FOXJ2	FOXJ2_HUMAN Forkhead box protein J2 OS=Homo sapiens OX=9606 GN=FOXJ2 PE=1 SV=1	C(ITC[C])SPGSPTDPNATLSK|C(ITC[C])SPGSPTDPNATLSK|C(ITC[C])SPGSPTDPNATLSK|||||	1|1|2|||||	1.12|1.18|0.9|||||	NA|NA|0.01414|||||	1.06667	0.14742	4	3
Q9NX58_30	LYAR	LYAR_HUMAN Cell growth-regulating nucleolar protein OS=Homo sapiens OX=9606 GN=LYAR PE=1 SV=2	||C(ITC[C])LSCIDCGK||||C(ITC[C])LSCIDCGK|C(ITC[C])LSCIDCGK	||1||||1|2	||1.15||||1.14|0.91	||NA||||NA|0.0	1.06667	0.13577	4	3
Q9HBM0_41	VEZT	VEZA_HUMAN Vezatin OS=Homo sapiens OX=9606 GN=VEZT PE=1 SV=3	|C(ITC[C])TTEGQQKPPTR||C(ITC[C])TTEGQQKPPTR||C(ITC[C])TTEGQQKPPTR||C(ITC[C])TTEGQQKPPTR	|1||2||1||1	|1.37||1.135||0.96||0.8	|NA||0.0495||NA||NA	1.06625	0.24438	5	4
Q9UQ35_872	SRRM2	SRRM2_HUMAN Serine/arginine repetitive matrix protein 2 OS=Homo sapiens OX=9606 GN=SRRM2 PE=1 SV=2	C(ITC[C])FESSPDPELK|C(ITC[C])FESSPDPELK|C(ITC[C])FESSPDPELK|C(ITC[C])FESSPDPELK|C(ITC[C])FESSPDPELK|C(ITC[C])FESSPDPELK|C(ITC[C])FESSPDPELK|C(ITC[C])FESSPDPELK	4|2|4|2|3|1|2|5	1.27|1.43|1.105|0.93|0.93|0.9|0.965|1.0	0.09849|0.02828|0.18209|0.08485|0.08083|NA|0.10607|0.03	1.06625	0.19076	23	8
P14618_152	PKM	KPYM_HUMAN Pyruvate kinase PKM OS=Homo sapiens OX=9606 GN=PKM PE=1 SV=4	C(ITC[C])DENILWLDYK|C(ITC[C])DENILWLDYK|C(ITC[C])DENILWLDYK|C(ITC[C])DENILWLDYK|||C(ITC[C])DENILWLDYK|	1|5|1|1|||1|	0.72|0.67|1.45|1.08|||1.41|	NA|0.0719|NA|NA|||NA|	1.066	0.36828	9	5
P10809_237	HSPD1	CH60_HUMAN 60 kDa heat shock protein, mitochondrial OS=Homo sapiens OX=9606 GN=HSPD1 PE=1 SV=2	C(ITC[C])EFQDAYVLLSEK|C(ITC[C])EFQDAYVLLSEK|C(ITC[C])EFQDAYVLLSEK||C(ITC[C])EFQDAYVLLSEK||C(ITC[C])EFQDAYVLLSEK|C(ITC[C])EFQDAYVLLSEK	4|6|2||2||3|3	1.31|1.41|0.94||0.88||0.97|0.88	0.1841|0.13438|0.0||0.22627||0.07572|0.01155	1.065	0.2333	20	6
O95373_827	IPO7	IPO7_HUMAN Importin-7 OS=Homo sapiens OX=9606 GN=IPO7 PE=1 SV=1	||C(ITC[C])FLGLHDR|C(ITC[C])FLGLHDR||C(ITC[C])FLGLHDR||C(ITC[C])FLGLHDR	||1|1||1||2	||1.33|0.77||1.07||1.09	||NA|NA||NA||0.31113	1.065	0.22942	5	4
Q8TDD1_389	DDX54	DDX54_HUMAN ATP-dependent RNA helicase DDX54 OS=Homo sapiens OX=9606 GN=DDX54 PE=1 SV=2	C(ITC[C])STLIVTDLAAR|C(ITC[C])STLIVTDLAAR|C(ITC[C])STLIVTDLAAR|C(ITC[C])STLIVTDLAAR|C(ITC[C])STLIVTDLAAR|C(ITC[C])STLIVTDLAAR|C(ITC[C])STLIVTDLAAR|C(ITC[C])STLIVTDLAAR	2|4|1|3|1|2|2|1	0.815|0.78|1.04|1.04|1.18|1.245|1.06|1.36	0.02121|0.07588|NA|0.07|NA|0.14849|0.0|NA	1.065	0.19916	16	8
Q8IY18_881	SMC5	SMC5_HUMAN Structural maintenance of chromosomes protein 5 OS=Homo sapiens OX=9606 GN=SMC5 PE=1 SV=2	C(ITC[C])FTGLNPTIVQEYTK|C(ITC[C])FTGLNPTIVQEYTK||C(ITC[C])FTGLNPTIVQEYTK||C(ITC[C])FTGLNPTIVQEYTK||C(ITC[C])FTGLNPTIVQEYTK	1|2||2||1||1	0.81|1.17||1.295||1.12||0.93	NA|0.5374||0.26163||NA||NA	1.065	0.19378	7	5
Q9NX20_167	MRPL16	RM16_HUMAN 39S ribosomal protein L16, mitochondrial OS=Homo sapiens OX=9606 GN=MRPL16 PE=1 SV=1	C(ITC[C])EFEEVQGFLDQVAHK|||C(ITC[C])EFEEVQGFLDQVAHK||||C(ITC[C])EFEEVQGFLDQVAHK	2|||2||||2	1.195|||1.01||||0.99	0.20506|||0.0||||0.0	1.065	0.11303	6	3
Q9H0R6_236	QRSL1	GATA_HUMAN Glutamyl-tRNA(Gln) amidotransferase subunit A, mitochondrial OS=Homo sapiens OX=9606 GN=QRSL1 PE=1 SV=2	C(ITC[C])VDDAAIVLGALAGPDPR|C(ITC[C])VDDAAIVLGALAGPDPR|||||C(ITC[C])VDDAAIVLGALAGPDPR|	2|2|||||2|	1.085|1.13|||||0.98|	0.02121|0.0|||||0.0|	1.065	0.07697	6	3
P82932_105	MRPS6	RT06_HUMAN 28S ribosomal protein S6, mitochondrial OS=Homo sapiens OX=9606 GN=MRPS6 PE=1 SV=3	C(ITC[C])EGIVPVPLAEK|C(ITC[C])EGIVPVPLAEK|C(ITC[C])EGIVPVPLAEK|C(ITC[C])EGIVPVPLAEK|C(ITC[C])EGIVPVPLAEK|C(ITC[C])EGIVPVPLAEK|C(ITC[C])EGIVPVPLAEK|C(ITC[C])EGIVPVPLAEK	2|1|1|2|4|5|2|2	1.04|1.29|0.99|0.905|1.435|1.05|1.01|0.795	0.0|NA|NA|0.0495|0.67727|0.2572|0.29698|0.2192	1.06438	0.20547	19	8
Q659C4_102	LARP1B	LAR1B_HUMAN La-related protein 1B OS=Homo sapiens OX=9606 GN=LARP1B PE=1 SV=2	C(ITC[C])QPEANKPTHNNR||C(ITC[C])QPEANKPTHNNR|C(ITC[C])QPEANKPTHNNR||||	1||2|2||||	0.95||1.335|0.905||||	NA||0.45962|0.09192||||	1.06333	0.23634	5	3
P52732_911	KIF11	KIF11_HUMAN Kinesin-like protein KIF11 OS=Homo sapiens OX=9606 GN=KIF11 PE=1 SV=2	|||||C(ITC[C])FLEQDLK|C(ITC[C])FLEQDLK|C(ITC[C])FLEQDLK	|||||1|1|1	|||||0.99|1.17|1.03	|||||NA|NA|NA	1.06333	0.09452	3	3
P84103_6	SRSF3	SRSF3_HUMAN Serine/arginine-rich splicing factor 3 OS=Homo sapiens OX=9606 GN=SRSF3 PE=1 SV=1	||||C(ITC[C])PLDCK|C(ITC[C])PLDCK|C(ITC[C])PLDCK|C(ITC[C])PLDCK	||||1|1|1|2	||||0.82|1.12|1.3|1.01	||||NA|NA|NA|0.0	1.0625	0.20106	5	4
P35790_22	CHKA	CHKA_HUMAN Choline kinase alpha OS=Homo sapiens OX=9606 GN=CHKA PE=1 SV=3	||C(ITC[C])GSGSAAPAPGVGQQR|C(ITC[C])GSGSAAPAPGVGQQR|||C(ITC[C])GSGSAAPAPGVGQQR|C(ITC[C])GSGSAAPAPGVGQQR	||1|1|||1|2	||1.14|0.81|||1.12|1.18	||NA|NA|||NA|0.0	1.0625	0.17017	5	4
P60981_23	DSTN	DEST_HUMAN Destrin OS=Homo sapiens OX=9606 GN=DSTN PE=1 SV=3	C(ITC[C])STPEEIKK C(ITC[C])STPEEIK|C(ITC[C])STPEEIKK C(ITC[C])STPEEIK|C(ITC[C])STPEEIKK C(ITC[C])STPEEIK|C(ITC[C])STPEEIKK C(ITC[C])STPEEIK||||	5|4|2|2||||	0.65|1.02|1.09|1.48||||	0.15636|0.26538|0.04243|0.12728||||	1.06	0.3401	13	4
O60343_93	TBC1D4	TBCD4_HUMAN TBC1 domain family member 4 OS=Homo sapiens OX=9606 GN=TBC1D4 PE=1 SV=2	C(ITC[C])VPAPGAGASGGTSPSATQPNPAVFIFEHK|C(ITC[C])VPAPGAGASGGTSPSATQPNPAVFIFEHK|C(ITC[C])VPAPGAGASGGTSPSATQPNPAVFIFEHK|C(ITC[C])VPAPGAGASGGTSPSATQPNPAVFIFEHK|||C(ITC[C])VPAPGAGASGGTSPSATQPNPAVFIFEHK|	2|1|1|1|||1|	1.15|1.33|0.88|0.92|||1.02|	0.02828|NA|NA|NA|||NA|	1.06	0.18344	6	5
Q9P2E9_933	RRBP1	RRBP1_HUMAN Ribosome-binding protein 1 OS=Homo sapiens OX=9606 GN=RRBP1 PE=1 SV=5	C(ITC[C])EELSGLHGQLQEAR|C(ITC[C])EELSGLHGQLQEAR|C(ITC[C])EELSGLHGQLQEAR|C(ITC[C])EELSGLHGQLQEAR||||	3|1|2|1||||	0.91|1.22|1.04|1.07||||	0.09074|NA|0.05657|NA||||	1.06	0.12728	7	4
Q96KG9_446	SCYL1	SCYL1_HUMAN N-terminal kinase-like protein OS=Homo sapiens OX=9606 GN=SCYL1 PE=1 SV=1	|C(ITC[C])NTTVCLGK|C(ITC[C])NTTVCLGK||C(ITC[C])NTTVCLGK|||	|1|1||1|||	|1.01|1.16||1.01|||	|NA|NA||NA|||	1.06	0.0866	3	3
Q02543_22	RPL18A	RL18A_HUMAN 60S ribosomal protein L18a OS=Homo sapiens OX=9606 GN=RPL18A PE=1 SV=2	C(ITC[C])HTPPLYR|C(ITC[C])HTPPLYR|C(ITC[C])HTPPLYR|C(ITC[C])HTPPLYR|C(ITC[C])HTPPLYR|C(ITC[C])HTPPLYR|C(ITC[C])HTPPLYR|C(ITC[C])HTPPLYR	74|73|42|42|43|39|38|34	0.705|0.7|1.18|1.17|1.17|1.18|1.2|1.16	0.14355|0.17289|0.19691|0.16995|0.11712|0.12774|0.12072|0.16007	1.05812	0.2198	385	8
P14618_424	PKM	KPYM_HUMAN Pyruvate kinase PKM OS=Homo sapiens OX=9606 GN=PKM PE=1 SV=4	CC(ITC[C])SGAIIVLTK C(ITC[C])SGAIIVLTK|CC(ITC[C])SGAIIVLTK C(ITC[C])SGAIIVLTK|C(ITC[C])SGAIIVLTK CC(ITC[C])SGAIIVLTK|CC(ITC[C])SGAIIVLTK C(ITC[C])SGAIIVLTK|C(ITC[C])SGAIIVLTK|C(ITC[C])SGAIIVLTK|CC(ITC[C])SGAIIVLTK C(ITC[C])SGAIIVLTK|C(ITC[C])SGAIIVLTK	6|6|4|5|6|7|7|6	1.01|0.985|1.13|1.1|0.94|0.92|1.23|1.15	0.83994|1.00277|0.1021|0.03899|0.28032|0.03805|0.99986|0.01862	1.05812	0.11058	47	8
Q6ZMZ0_290	RNF19B	RN19B_HUMAN E3 ubiquitin-protein ligase RNF19B OS=Homo sapiens OX=9606 GN=RNF19B PE=1 SV=2	C(ITC[C])SAYIIK|C(ITC[C])SAYIIK|C(ITC[C])SAYIIK||C(ITC[C])SAYIIK|||	1|3|1||1|||	0.92|0.84|1.32||1.15|||	NA|0.12288|NA||NA|||	1.0575	0.21884	6	4
P50914_54	RPL14	RL14_HUMAN 60S ribosomal protein L14 OS=Homo sapiens OX=9606 GN=RPL14 PE=1 SV=4	C(ITC[C])MQLTDFILK|C(ITC[C])MQLTDFILK|C(ITC[C])MQLTDFILK|C(ITC[C])MQLTDFILK|C(ITC[C])MQLTDFILK|C(ITC[C])MQLTDFILK|C(ITC[C])MQLTDFILK|C(ITC[C])MQLTDFILK	7|9|5|3|4|4|4|5	0.75|0.73|1.12|1.01|1.245|1.255|1.13|1.22	0.02968|0.02028|0.07842|0.02887|0.05916|0.10372|0.03786|0.1031	1.0575	0.21173	41	8
P49321_568	NASP	NASP_HUMAN Nuclear autoantigenic sperm protein OS=Homo sapiens OX=9606 GN=NASP PE=1 SV=2	C(ITC[C])LNLQEQYLEAHDR|C(ITC[C])LNLQEQYLEAHDR|C(ITC[C])LNLQEQYLEAHDR|C(ITC[C])LNLQEQYLEAHDR|C(ITC[C])LNLQEQYLEAHDR|C(ITC[C])LNLQEQYLEAHDR|C(ITC[C])LNLQEQYLEAHDR|C(ITC[C])LNLQEQYLEAHDR	1|1|3|2|1|1|1|1	1.16|1.06|1.27|1.035|0.92|1.21|0.95|0.85	NA|NA|0.20207|0.14849|NA|NA|NA|NA	1.05688	0.14782	11	8
P17812_491	CTPS1	PYRG1_HUMAN CTP synthase 1 OS=Homo sapiens OX=9606 GN=CTPS1 PE=1 SV=2	C(ITC[C])LEEQGLK|C(ITC[C])LEEQGLK|C(ITC[C])LEEQGLK|C(ITC[C])LEEQGLK|C(ITC[C])LEEQGLK|C(ITC[C])LEEQGLK|C(ITC[C])LEEQGLK|C(ITC[C])LEEQGLK	3|5|1|1|2|1|1|2	0.73|0.78|1.12|1.25|0.915|1.19|1.34|1.13	0.02309|0.10691|NA|NA|0.09192|NA|NA|0.18385	1.05687	0.22301	16	8
P40763_718	STAT3	STAT3_HUMAN Signal transducer and activator of transcription 3 OS=Homo sapiens OX=9606 GN=STAT3 PE=1 SV=2	||C(ITC[C])SNTIDLPMSPR|||C(ITC[C])SNTIDLPMSPR|C(ITC[C])SNTIDLPMSPR|	||1|||1|1|	||0.99|||1.16|1.02|	||NA|||NA|NA|	1.05667	0.09074	3	3
Q92621_698	NUP205	NU205_HUMAN Nuclear pore complex protein Nup205 OS=Homo sapiens OX=9606 GN=NUP205 PE=1 SV=3	|C(ITC[C])EEYPLTR||C(ITC[C])EEYPLTR|C(ITC[C])EEYPLTR|||	|1||2|1|||	|1.01||1.0|1.16|||	|NA||0.05657|NA|||	1.05667	0.08963	4	3
Q01831_60	XPC	XPC_HUMAN DNA repair protein complementing XP-C cells OS=Homo sapiens OX=9606 GN=XPC PE=1 SV=4	GC(ITC[C])SHPGGSADGPAK C(ITC[C])SHPGGSADGPAK|GC(ITC[C])SHPGGSADGPAK|GC(ITC[C])SHPGGSADGPAK|GC(ITC[C])SHPGGSADGPAK|C(ITC[C])SHPGGSADGPAK||C(ITC[C])SHPGGSADGPAK|C(ITC[C])SHPGGSADGPAK	2|2|2|2|1||3|1	0.71|0.66|1.36|1.17|0.77||1.43|1.29	0.11314|0.0|0.0|0.0|NA||0.15588|NA	1.05571	0.33125	13	7
P11177_249	PDHB	ODPB_HUMAN Pyruvate dehydrogenase E1 component subunit beta, mitochondrial OS=Homo sapiens OX=9606 GN=PDHB PE=1 SV=3	C(ITC[C])LEAAAVLSK|C(ITC[C])LEAAAVLSK|C(ITC[C])LEAAAVLSK|C(ITC[C])LEAAAVLSK|C(ITC[C])LEAAAVLSK|C(ITC[C])LEAAAVLSK|C(ITC[C])LEAAAVLSK|C(ITC[C])LEAAAVLSK	5|5|3|4|7|4|6|5	1.61|1.65|0.78|0.85|0.98|0.955|0.815|0.8	0.06427|0.02|0.02082|0.0755|0.07988|0.06377|0.1164|0.10784	1.055	0.36213	39	8
P08238_412	HSP90AB1	HS90B_HUMAN Heat shock protein HSP 90-beta OS=Homo sapiens OX=9606 GN=HSP90AB1 PE=1 SV=4	C(ITC[C])LELFSELAEDKENYKK C(ITC[C])LELFSELAEDKENYK C(ITC[C])LELFSELAEDK|C(ITC[C])LELFSELAEDKENYKK C(ITC[C])LELFSELAEDKENYK C(ITC[C])LELFSELAEDK|C(ITC[C])LELFSELAEDKENYKK C(ITC[C])LELFSELAEDKENYK|C(ITC[C])LELFSELAEDKENYKK C(ITC[C])LELFSELAEDKENYK|||C(ITC[C])LELFSELAEDKENYK|C(ITC[C])LELFSELAEDKENYK	18|17|10|8|||1|2	1.405|1.46|0.99|0.92|||0.77|0.785	0.13562|0.29964|0.09153|0.22576|||NA|0.14849	1.055	0.30434	56	6
P27695_208	APEX1	APEX1_HUMAN DNA-(apurinic or apyrimidinic site) endonuclease OS=Homo sapiens OX=9606 GN=APEX1 PE=1 SV=2	||C(ITC[C])GDLNVAHEEIDLR|C(ITC[C])GDLNVAHEEIDLR|||C(ITC[C])GDLNVAHEEIDLR|C(ITC[C])GDLNVAHEEIDLR	||3|4|||3|1	||1.06|1.16|||1.07|0.93	||0.03606|0.13856|||0.03464|NA	1.055	0.09469	11	4
Q14247_112	CTTN	SRC8_HUMAN Src substrate cortactin OS=Homo sapiens OX=9606 GN=CTTN PE=1 SV=2	C(ITC[C])SQVDSVR||HC(ITC[C])SQVDSVR C(ITC[C])SQVDSVR|C(ITC[C])SQVDSVR|C(ITC[C])SQVDSVR|HC(ITC[C])SQVDSVR C(ITC[C])SQVDSVR|HC(ITC[C])SQVDSVR C(ITC[C])SQVDSVR|C(ITC[C])SQVDSVR	1||4|1|1|2|2|1	0.43||1.41|1.39|0.82|0.785|1.385|1.16	NA||0.25839|NA|NA|0.03536|0.13435|NA	1.05429	0.3823	12	7
Q9BTX1_468	NDC1	NDC1_HUMAN Nucleoporin NDC1 OS=Homo sapiens OX=9606 GN=NDC1 PE=1 SV=2	C(ITC[C])YGSPQSPQLIR||C(ITC[C])YGSPQSPQLIR|C(ITC[C])YGSPQSPQLIR||C(ITC[C])YGSPQSPQLIR|C(ITC[C])YGSPQSPQLIR|C(ITC[C])YGSPQSPQLIR	1||1|1||3|1|3	1.64||0.77|0.63||1.17|0.95|1.16	NA||NA|NA||0.08083|NA|0.24062	1.05333	0.35758	10	6
O00186_546	STXBP3	STXB3_HUMAN Syntaxin-binding protein 3 OS=Homo sapiens OX=9606 GN=STXBP3 PE=1 SV=2	C(ITC[C])AYEVSQAHK|C(ITC[C])AYEVSQAHK|C(ITC[C])AYEVSQAHK|C(ITC[C])AYEVSQAHK||C(ITC[C])AYEVSQAHK||C(ITC[C])AYEVSQAHK	3|2|3|1||1||1	0.86|1.21|0.81|1.49||1.11||0.84	0.14|0.32527|0.0|NA||NA||NA	1.05333	0.26853	11	6
P09622_80	DLD	DLDH_HUMAN Dihydrolipoyl dehydrogenase, mitochondrial OS=Homo sapiens OX=9606 GN=DLD PE=1 SV=2	||||C(ITC[C])LNVGCIPSK||C(ITC[C])LNVGCIPSK|C(ITC[C])LNVGCIPSK	||||1||1|1	||||1.07||1.0|1.09	||||NA||NA|NA	1.05333	0.04726	3	3
Q86X55_420	CARM1	CARM1_HUMAN Histone-arginine methyltransferase CARM1 OS=Homo sapiens OX=9606 GN=CARM1 PE=1 SV=3	C(ITC[C])LFQSPLFAK|C(ITC[C])LFQSPLFAK|||C(ITC[C])LFQSPLFAK|C(ITC[C])LFQSPLFAK|C(ITC[C])LFQSPLFAK|	3|3|||1|1|2|	1.15|0.88|||1.22|1.0|1.01|	0.05774|0.10817|||NA|NA|0.05657|	1.052	0.13405	10	5
P36578_125	RPL4	RL4_HUMAN 60S ribosomal protein L4 OS=Homo sapiens OX=9606 GN=RPL4 PE=1 SV=5	C(ITC[C])SALAASALPALVMSK|C(ITC[C])SALAASALPALVMSK|C(ITC[C])SALAASALPALVMSK|C(ITC[C])SALAASALPALVMSK||||	2|2|1|2||||	0.82|1.115|1.23|1.04||||	0.12728|0.03536|NA|0.15556||||	1.05125	0.17284	7	4
Q5JTZ9_555	AARS2	SYAM_HUMAN Alanine--tRNA ligase, mitochondrial OS=Homo sapiens OX=9606 GN=AARS2 PE=1 SV=1	C(ITC[C])GLLLDR||C(ITC[C])GLLLDR|C(ITC[C])GLLLDR|C(ITC[C])GLLLDR|C(ITC[C])GLLLDR|C(ITC[C])GLLLDR|C(ITC[C])GLLLDR	1||3|2|1|1|1|2	0.77||1.08|0.935|1.13|1.38|1.1|0.96	NA||0.03512|0.12021|NA|NA|NA|0.12728	1.05071	0.1908	11	7
Q99460_104	PSMD1	PSMD1_HUMAN 26S proteasome non-ATPase regulatory subunit 1 OS=Homo sapiens OX=9606 GN=PSMD1 PE=1 SV=2	C(ITC[C])IDHYTK|||C(ITC[C])IDHYTK|C(ITC[C])IDHYTK||C(ITC[C])IDHYTK|C(ITC[C])IDHYTK	1|||1|4||1|1	1.68|||0.85|0.93||0.85|0.94	NA|||NA|0.005||NA|NA	1.05	0.35475	8	5
P30405_104	PPIF	PPIF_HUMAN Peptidyl-prolyl cis-trans isomerase F, mitochondrial OS=Homo sapiens OX=9606 GN=PPIF PE=1 SV=1	|C(ITC[C])QAGDFTNHNGTGGK|C(ITC[C])QAGDFTNHNGTGGK|C(ITC[C])QAGDFTNHNGTGGK||||	|2|2|1||||	|1.39|0.76|1.0||||	|0.33941|0.11314|NA||||	1.05	0.31796	5	3
Q14C86_789	GAPVD1	GAPD1_HUMAN GTPase-activating protein and VPS9 domain-containing protein 1 OS=Homo sapiens OX=9606 GN=GAPVD1 PE=1 SV=2	||||C(ITC[C])SSDFGGK|C(ITC[C])SSDFGGK|C(ITC[C])SSDFGGK|C(ITC[C])SSDFGGK	||||1|1|2|2	||||1.04|0.75|1.415|0.995	||||NA|NA|0.24749|0.00707	1.05	0.27468	6	4
P51649_340	ALDH5A1	SSDH_HUMAN Succinate-semialdehyde dehydrogenase, mitochondrial OS=Homo sapiens OX=9606 GN=ALDH5A1 PE=1 SV=2	C(ITC[C])VCSNQFLVQR|C(ITC[C])VCSNQFLVQR||C(ITC[C])VCSNQFLVQR|C(ITC[C])VCSNQFLVQR|C(ITC[C])VCSNQFLVQR|C(ITC[C])VCSNQFLVQR|	3|1||4|1|1|1|	1.36|1.37||0.83|1.09|0.84|0.81|	0.41284|NA||0.03948|NA|NA|NA|	1.05	0.26465	11	6
Q9NP79_87	VTA1	VTA1_HUMAN Vacuolar protein sorting-associated protein VTA1 homolog OS=Homo sapiens OX=9606 GN=VTA1 PE=1 SV=1	||C(ITC[C])AHLENYALK|||C(ITC[C])AHLENYALK||C(ITC[C])AHLENYALK	||3|||1||1	||1.16|||0.92||1.07	||0.0|||NA||NA	1.05	0.12124	5	3
Q9Y5X3_250	SNX5	SNX5_HUMAN Sorting nexin-5 OS=Homo sapiens OX=9606 GN=SNX5 PE=1 SV=1	||||C(ITC[C])LHSLALEEPTVIK|C(ITC[C])LHSLALEEPTVIK||C(ITC[C])LHSLALEEPTVIK	||||2|2||1	||||1.01|1.16||0.98	||||0.0|0.0||NA	1.05	0.09644	5	3
P05198_199	EIF2S1	IF2A_HUMAN Eukaryotic translation initiation factor 2 subunit 1 OS=Homo sapiens OX=9606 GN=EIF2S1 PE=1 SV=3	||||C(ITC[C])YGYEGIDAVK|C(ITC[C])YGYEGIDAVK|C(ITC[C])YGYEGIDAVK|C(ITC[C])YGYEGIDAVK	||||1|1|1|1	||||1.03|1.05|1.07|1.05	||||NA|NA|NA|NA	1.05	0.01633	4	4
P0DN79_52	CBSL	CBSL_HUMAN Cystathionine beta-synthase-like protein OS=Homo sapiens OX=9606 GN=CBSL PE=1 SV=1	C(ITC[C])TWQLGR|C(ITC[C])TWQLGR|C(ITC[C])TWQLGR|C(ITC[C])TWQLGR|C(ITC[C])TWQLGR||C(ITC[C])TWQLGR|C(ITC[C])TWQLGR	3|1|2|1|1||1|1	1.85|1.09|0.94|0.98|0.6||0.98|0.9	0.26764|NA|0.04243|NA|NA||NA|NA	1.04857	0.38481	10	7
P03243_451		E1B55_ADE05 E1B 55 kDa protein OS=Human adenovirus C serotype 5 OX=28285 PE=1 SV=1	C(ITC[C])RPCECGGK|C(ITC[C])RPCECGGK|C(ITC[C])RPCECGGK||C(ITC[C])RPCECGGK|C(ITC[C])RPCECGGK|C(ITC[C])RPCECGGK|	3|3|2||3|3|1|	1.13|1.1|0.93||0.95|1.24|0.94|	0.01732|0.32332|0.0||0.02887|0.18475|NA|	1.04833	0.12766	15	6
O75947_101	ATP5PD	ATP5H_HUMAN ATP synthase subunit d, mitochondrial OS=Homo sapiens OX=9606 GN=ATP5PD PE=1 SV=3	C(ITC[C])AEWVSLSK|C(ITC[C])AEWVSLSK|C(ITC[C])AEWVSLSK|C(ITC[C])AEWVSLSK|C(ITC[C])AEWVSLSK|C(ITC[C])AEWVSLSK|C(ITC[C])AEWVSLSK|C(ITC[C])AEWVSLSK	4|4|5|4|2|1|2|3	0.965|0.885|1.24|1.08|1.0|1.07|1.075|1.07	0.05737|0.15777|0.03912|0.21687|0.02828|NA|0.12021|0.24194	1.04812	0.10375	25	8
Q14160_22	SCRIB	SCRIB_HUMAN Protein scribble homolog OS=Homo sapiens OX=9606 GN=SCRIB PE=1 SV=4	C(ITC[C])SLQAVPEEIYR||C(ITC[C])SLQAVPEEIYR|C(ITC[C])SLQAVPEEIYR|||C(ITC[C])SLQAVPEEIYR|	1||1|1|||2|	1.44||0.9|0.93|||0.92|	NA||NA|NA|||0.01414|	1.0475	0.26196	5	4
P22314_1040	UBA1	UBA1_HUMAN Ubiquitin-like modifier-activating enzyme 1 OS=Homo sapiens OX=9606 GN=UBA1 PE=1 SV=3	||C(ITC[C])NDESGEDVEVPYVR|C(ITC[C])NDESGEDVEVPYVR|C(ITC[C])NDESGEDVEVPYVR|||	||1|1|3|||	||1.13|1.29|0.72|||	||NA|NA|0.0|||	1.04667	0.294	5	3
Q08211_1029	DHX9	DHX9_HUMAN ATP-dependent RNA helicase A OS=Homo sapiens OX=9606 GN=DHX9 PE=1 SV=4	||C(ITC[C])PFSSQDMK||||C(ITC[C])PFSSQDMK|C(ITC[C])PFSSQDMK	||1||||1|1	||0.96||||0.86|1.32	||NA||||NA|NA	1.04667	0.24194	3	3
P62879_25	GNB2	GBB2_HUMAN Guanine nucleotide-binding protein G(I)/G(S)/G(T) subunit beta-2 OS=Homo sapiens OX=9606 GN=GNB2 PE=1 SV=3	||C(ITC[C])GDSTLTQITAGLDPVGR||||AC(ITC[C])GDSTLTQITAGLDPVGR|AC(ITC[C])GDSTLTQITAGLDPVGR	||1||||2|1	||0.92||||1.08|1.14	||NA||||0.0|NA	1.04667	0.11372	4	3
P54886_88	ALDH18A1	P5CS_HUMAN Delta-1-pyrroline-5-carboxylate synthase OS=Homo sapiens OX=9606 GN=ALDH18A1 PE=1 SV=2	|C(ITC[C])GLALGR||C(ITC[C])GLALGR|C(ITC[C])GLALGR|C(ITC[C])GLALGR|C(ITC[C])GLALGR|C(ITC[C])GLALGR	|1||2|2|2|1|2	|1.09||0.8|1.41|0.985|1.0|0.99	|NA||0.2687|0.04243|0.27577|NA|0.0	1.04583	0.20195	10	6
Q9BVP2_158	GNL3	GNL3_HUMAN Guanine nucleotide-binding protein-like 3 OS=Homo sapiens OX=9606 GN=GNL3 PE=1 SV=2	C(ITC[C])PQVEEAIVQSGQK|C(ITC[C])PQVEEAIVQSGQK|C(ITC[C])PQVEEAIVQSGQK|C(ITC[C])PQVEEAIVQSGQK|C(ITC[C])PQVEEAIVQSGQK DPLGCRC(ITC[C])PQVEEAIVQSGQK|C(ITC[C])PQVEEAIVQSGQK DPLGCRC(ITC[C])PQVEEAIVQSGQK|C(ITC[C])PQVEEAIVQSGQK DPLGCRC(ITC[C])PQVEEAIVQSGQK|C(ITC[C])PQVEEAIVQSGQK DPLGCRC(ITC[C])PQVEEAIVQSGQK	1|8|6|6|7|5|8|6	1.24|1.22|0.885|0.83|1.12|1.12|0.98|0.97	NA|0.17653|0.06921|0.09585|0.16653|0.33904|0.11436|0.1663	1.04563	0.15193	47	8
O75179_210	ANKRD17	ANR17_HUMAN Ankyrin repeat domain-containing protein 17 OS=Homo sapiens OX=9606 GN=ANKRD17 PE=1 SV=3	C(ITC[C])ALDEAAAALTR|C(ITC[C])ALDEAAAALTR||C(ITC[C])ALDEAAAALTR||||C(ITC[C])ALDEAAAALTR	1|2||2||||1	1.51|1.25||0.65||||0.77	NA|0.01414||0.0||||NA	1.045	0.4041	6	4
Q14690_151	PDCD11	RRP5_HUMAN Protein RRP5 homolog OS=Homo sapiens OX=9606 GN=PDCD11 PE=1 SV=3	C(ITC[C])VVSSLGITDR|C(ITC[C])VVSSLGITDR|C(ITC[C])VVSSLGITDR|C(ITC[C])VVSSLGITDR|C(ITC[C])VVSSLGITDR|C(ITC[C])VVSSLGITDR||C(ITC[C])VVSSLGITDR	1|8|2|3|1|2||2	0.99|1.01|0.9|0.91|1.03|1.065||1.41	NA|0.05055|0.0|0.00577|NA|0.02121||0.0	1.045	0.17193	19	7
Q9H845_179	ACAD9	ACAD9_HUMAN Complex I assembly factor ACAD9, mitochondrial OS=Homo sapiens OX=9606 GN=ACAD9 PE=1 SV=1	C(ITC[C])LTEPASGSDAASIR|C(ITC[C])LTEPASGSDAASIR|C(ITC[C])LTEPASGSDAASIR|C(ITC[C])LTEPASGSDAASIR|C(ITC[C])LTEPASGSDAASIR|C(ITC[C])LTEPASGSDAASIR|C(ITC[C])LTEPASGSDAASIR|C(ITC[C])LTEPASGSDAASIR	2|2|2|3|3|2|1|2	1.17|1.56|0.835|0.88|1.05|0.81|1.04|1.005	0.07071|0.2687|0.09192|0.07|0.0|0.01414|NA|0.00707	1.04375	0.24173	17	8
P41250_616	GARS1	GARS_HUMAN Glycine--tRNA ligase OS=Homo sapiens OX=9606 GN=GARS1 PE=1 SV=3	C(ITC[C])SVLPLSQNQEFMPFVK|C(ITC[C])SVLPLSQNQEFMPFVK|C(ITC[C])SVLPLSQNQEFMPFVK|C(ITC[C])SVLPLSQNQEFMPFVK|C(ITC[C])SVLPLSQNQEFMPFVK|C(ITC[C])SVLPLSQNQEFMPFVK||C(ITC[C])SVLPLSQNQEFMPFVK	4|2|2|2|3|2||1	0.68|0.66|1.41|1.23|1.06|1.095||1.17	0.26924|0.12728|0.02828|0.01414|0.02887|0.07778||NA	1.04357	0.27906	16	7
Q13617_721	CUL2	CUL2_HUMAN Cullin-2 OS=Homo sapiens OX=9606 GN=CUL2 PE=1 SV=2	||C(ITC[C])IEVLIDK|C(ITC[C])IEVLIDK|||C(ITC[C])IEVLIDK|	||3|3|||1|	||0.97|1.05|||1.11|	||0.08386|0.14468|||NA|	1.04333	0.07024	7	3
P0DN79_370	CBSL	CBSL_HUMAN Cystathionine beta-synthase-like protein OS=Homo sapiens OX=9606 GN=CBSL PE=1 SV=1	C(ITC[C])VVILPDSVR|C(ITC[C])VVILPDSVR|C(ITC[C])VVILPDSVR|C(ITC[C])VVILPDSVR|C(ITC[C])VVILPDSVR|C(ITC[C])VVILPDSVR|C(ITC[C])VVILPDSVR|C(ITC[C])VVILPDSVR	6|8|6|6|3|4|6|6	1.65|1.615|0.63|0.66|1.05|1.07|0.88|0.79	0.02338|0.1978|0.04665|0.1502|0.16073|0.05965|0.05354|0.0494	1.04312	0.39718	45	8
P51659_425	HSD17B4	DHB4_HUMAN Peroxisomal multifunctional enzyme type 2 OS=Homo sapiens OX=9606 GN=HSD17B4 PE=1 SV=3	C(ITC[C])EAVVADVLDK|C(ITC[C])EAVVADVLDK|C(ITC[C])EAVVADVLDK|C(ITC[C])EAVVADVLDK|C(ITC[C])EAVVADVLDK|C(ITC[C])EAVVADVLDK|C(ITC[C])EAVVADVLDK|C(ITC[C])EAVVADVLDK	5|3|4|7|3|3|4|5	1.06|1.18|0.98|1.09|1.06|0.99|1.0|0.98	0.10407|0.0611|0.13856|0.07254|0.05196|0.04583|0.05377|0.00447	1.0425	0.06985	34	8
Q9Y496_621	KIF3A	KIF3A_HUMAN Kinesin-like protein KIF3A OS=Homo sapiens OX=9606 GN=KIF3A PE=1 SV=4	||C(ITC[C])VAYTGNNMR|C(ITC[C])VAYTGNNMR|C(ITC[C])VAYTGNNMR|C(ITC[C])VAYTGNNMR||C(ITC[C])VAYTGNNMR	||3|3|2|1||2	||0.98|1.12|1.1|1.04||0.965	||0.07506|0.20207|0.04243|NA||0.23335	1.041	0.06932	11	5
Q99714_58	HSD17B10	HCD2_HUMAN 3-hydroxyacyl-CoA dehydrogenase type-2 OS=Homo sapiens OX=9606 GN=HSD17B10 PE=1 SV=3	C(ITC[C])VFAPADVTSEK C(ITC[C])VFAPADVTSEKDVQTALALAK|C(ITC[C])VFAPADVTSEK C(ITC[C])VFAPADVTSEKDVQTALALAK|C(ITC[C])VFAPADVTSEK|C(ITC[C])VFAPADVTSEK|C(ITC[C])VFAPADVTSEK|C(ITC[C])VFAPADVTSEK C(ITC[C])VFAPADVTSEKDVQTALALAK|C(ITC[C])VFAPADVTSEK C(ITC[C])VFAPADVTSEKDVQTALALAK|C(ITC[C])VFAPADVTSEK C(ITC[C])VFAPADVTSEKDVQTALALAK	6|5|7|5|5|5|6|6	1.72|1.65|0.8|0.79|0.86|0.83|0.835|0.835	0.29503|0.34034|0.04541|0.10831|0.06979|0.03493|0.18371|0.08998	1.04	0.39913	45	8
Q9BR61_41	ACBD6	ACBD6_HUMAN Acyl-CoA-binding domain-containing protein 6 OS=Homo sapiens OX=9606 GN=ACBD6 PE=1 SV=1	C(ITC[C])LAELFEK||C(ITC[C])LAELFEK|C(ITC[C])LAELFEK||C(ITC[C])LAELFEK||	1||3|1||1||	1.37||1.07|0.55||1.17||	NA||0.0|NA||NA||	1.04	0.34967	6	4
P42858_1441	HTT	HD_HUMAN Huntingtin OS=Homo sapiens OX=9606 GN=HTT PE=1 SV=2	|C(ITC[C])VQIQK|C(ITC[C])VQIQK|C(ITC[C])VQIQK|||C(ITC[C])VQIQK|	|1|1|1|||1|	|1.51|0.86|0.79|||1.0|	|NA|NA|NA|||NA|	1.04	0.32527	4	4
O60293_1494	ZFC3H1	ZC3H1_HUMAN Zinc finger C3H1 domain-containing protein OS=Homo sapiens OX=9606 GN=ZFC3H1 PE=1 SV=3	C(ITC[C])QSALAILQNALK||C(ITC[C])QSALAILQNALK|||||C(ITC[C])QSALAILQNALK	1||1|||||1	0.8||0.95|||||1.37	NA||NA|||||NA	1.04	0.29547	3	3
Q14527_360	HLTF	HLTF_HUMAN Helicase-like transcription factor OS=Homo sapiens OX=9606 GN=HLTF PE=1 SV=2	C(ITC[C])SEQPSISDIK|C(ITC[C])SEQPSISDIK|C(ITC[C])SEQPSISDIK|C(ITC[C])SEQPSISDIK||||	3|4|6|4||||	0.78|0.88|1.315|1.185||||	0.16289|0.07411|0.19974|0.025||||	1.04	0.25156	17	4
P50851_2675	LRBA	LRBA_HUMAN Lipopolysaccharide-responsive and beige-like anchor protein OS=Homo sapiens OX=9606 GN=LRBA PE=1 SV=4	C(ITC[C])SGIGDNPGSETAAPR|C(ITC[C])SGIGDNPGSETAAPR||C(ITC[C])SGIGDNPGSETAAPR|C(ITC[C])SGIGDNPGSETAAPR||C(ITC[C])SGIGDNPGSETAAPR|	1|1||1|1||4|	1.16|1.22||0.9|0.74||1.18|	NA|NA||NA|NA||0.30026|	1.04	0.20976	8	5
P60891_265	PRPS1	PRPS1_HUMAN Ribose-phosphate pyrophosphokinase 1 OS=Homo sapiens OX=9606 GN=PRPS1 PE=1 SV=2	|C(ITC[C])FEAVVVTNTIPQEDK|C(ITC[C])FEAVVVTNTIPQEDK|C(ITC[C])FEAVVVTNTIPQEDK||C(ITC[C])FEAVVVTNTIPQEDK|C(ITC[C])FEAVVVTNTIPQEDK|C(ITC[C])FEAVVVTNTIPQEDK	|1|2|1||1|2|1	|1.01|1.07|1.23||1.27|0.82|0.84	|NA|0.29698|NA||NA|0.18385|NA	1.04	0.18931	8	6
Q13823_257	GNL2	NOG2_HUMAN Nucleolar GTP-binding protein 2 OS=Homo sapiens OX=9606 GN=GNL2 PE=1 SV=1	C(ITC[C])DLVPTWATK|C(ITC[C])DLVPTWATK||C(ITC[C])DLVPTWATK|C(ITC[C])DLVPTWATK|C(ITC[C])DLVPTWATK|C(ITC[C])DLVPTWATK|C(ITC[C])DLVPTWATK	1|2||2|1|3|4|4	1.03|0.935||0.88|0.95|1.28|1.085|1.12	NA|0.07778||0.0|NA|0.12702|0.21577|0.06608	1.04	0.13592	17	7
O14802_961	POLR3A	RPC1_HUMAN DNA-directed RNA polymerase III subunit RPC1 OS=Homo sapiens OX=9606 GN=POLR3A PE=1 SV=2	||C(ITC[C])QDSFLQEIK|C(ITC[C])QDSFLQEIK||C(ITC[C])QDSFLQEIK||	||1|1||1||	||1.06|1.12||0.94||	||NA|NA||NA||	1.04	0.09165	3	3
P53602_12	MVD	MVD1_HUMAN Diphosphomevalonate decarboxylase OS=Homo sapiens OX=9606 GN=MVD PE=1 SV=1	||||C(ITC[C])TAPVNIAVIK|C(ITC[C])TAPVNIAVIK|C(ITC[C])TAPVNIAVIK|C(ITC[C])TAPVNIAVIK	||||1|1|3|2	||||1.02|1.14|1.05|0.95	||||NA|NA|0.03464|0.0	1.04	0.07874	7	4
Q9HCC0_216	MCCC2	MCCB_HUMAN Methylcrotonoyl-CoA carboxylase beta chain, mitochondrial OS=Homo sapiens OX=9606 GN=MCCC2 PE=1 SV=1	||C(ITC[C])TAGGAYVPAMADENIIVR|C(ITC[C])TAGGAYVPAMADENIIVR|C(ITC[C])TAGGAYVPAMADENIIVR|C(ITC[C])TAGGAYVPAMADENIIVR|C(ITC[C])TAGGAYVPAMADENIIVR|	||2|1|1|2|1|	||0.72|0.8|1.15|0.86|1.66|	||0.22627|NA|NA|0.05657|NA|	1.038	0.38369	7	5
P22830_196	FECH	HEMH_HUMAN Ferrochelatase, mitochondrial OS=Homo sapiens OX=9606 GN=FECH PE=1 SV=2	|C(ITC[C])STTGSSLNAIYR|C(ITC[C])STTGSSLNAIYR|C(ITC[C])STTGSSLNAIYR|||C(ITC[C])STTGSSLNAIYR|	|1|1|1|||1|	|1.25|0.83|0.8|||1.27|	|NA|NA|NA|||NA|	1.0375	0.25734	4	4
Q92747_279	ARPC1A	ARC1A_HUMAN Actin-related protein 2/3 complex subunit 1A OS=Homo sapiens OX=9606 GN=ARPC1A PE=1 SV=2	|||C(ITC[C])LTFVSK||C(ITC[C])LTFVSK|C(ITC[C])LTFVSK|C(ITC[C])LTFVSK	|||2||1|2|1	|||1.23||0.91|1.06|0.95	|||0.0||NA|0.08485|NA	1.0375	0.14315	6	4
Q9ULW0_145	TPX2	TPX2_HUMAN Targeting protein for Xklp2 OS=Homo sapiens OX=9606 GN=TPX2 PE=1 SV=2	C(ITC[C])ATPVIIDEILPSK|C(ITC[C])ATPVIIDEILPSK|C(ITC[C])ATPVIIDEILPSKK C(ITC[C])ATPVIIDEILPSK|C(ITC[C])ATPVIIDEILPSKK C(ITC[C])ATPVIIDEILPSK||C(ITC[C])ATPVIIDEILPSK|C(ITC[C])ATPVIIDEILPSK|C(ITC[C])ATPVIIDEILPSK	2|1|7|3||2|1|1	1.33|0.95|0.73|1.23||0.97|1.2|0.85	0.0|NA|0.19135|0.01155||0.11314|NA|NA	1.03714	0.22021	17	7
P38919_137	EIF4A3	IF4A3_HUMAN Eukaryotic initiation factor 4A-III OS=Homo sapiens OX=9606 GN=EIF4A3 PE=1 SV=4	||||C(ITC[C])HACIGGTNVGEDIR|C(ITC[C])HACIGGTNVGEDIR||C(ITC[C])HACIGGTNVGEDIR	||||2|2||2	||||0.94|1.04||1.13	||||0.01414|0.0||0.19799	1.03667	0.09504	6	3
Q9P0M9_88	MRPL27	RM27_HUMAN 39S ribosomal protein L27, mitochondrial OS=Homo sapiens OX=9606 GN=MRPL27 PE=1 SV=1	C(ITC[C])LYALEEGIVR||C(ITC[C])LYALEEGIVR|C(ITC[C])LYALEEGIVR||C(ITC[C])LYALEEGIVR||	2||2|1||1||	0.95||0.915|0.99||1.29||	0.11314||0.03536|NA||NA||	1.03625	0.17192	6	4
Q13111_79	CHAF1A	CAF1A_HUMAN Chromatin assembly factor 1 subunit A OS=Homo sapiens OX=9606 GN=CHAF1A PE=1 SV=3	||||C(ITC[C])HVGSDIDFRPK|C(ITC[C])HVGSDIDFRPK|C(ITC[C])HVGSDIDFRPK|C(ITC[C])HVGSDIDFRPK	||||2|1|4|3	||||1.065|1.13|0.93|1.02	||||0.07778|NA|0.18927|0.00577	1.03625	0.084	10	4
P51114_129	FXR1	FXR1_HUMAN Fragile X mental retardation syndrome-related protein 1 OS=Homo sapiens OX=9606 GN=FXR1 PE=1 SV=3	C(ITC[C])TVDVPEDLR|C(ITC[C])TVDVPEDLR|C(ITC[C])TVDVPEDLR|C(ITC[C])TVDVPEDLR|C(ITC[C])TVDVPEDLR|C(ITC[C])TVDVPEDLR|C(ITC[C])TVDVPEDLR|C(ITC[C])TVDVPEDLR	5|4|5|4|2|3|4|2	1.66|1.67|0.69|0.7|0.93|0.9|0.845|0.885	0.13398|0.20288|0.18393|0.04082|0.07071|0.06928|0.04924|0.00707	1.035	0.39874	29	8
Q9UHB9_525	SRP68	SRP68_HUMAN Signal recognition particle subunit SRP68 OS=Homo sapiens OX=9606 GN=SRP68 PE=1 SV=2	C(ITC[C])SLQAAAILDANDAHQTETSSSQVK|C(ITC[C])SLQAAAILDANDAHQTETSSSQVK|C(ITC[C])SLQAAAILDANDAHQTETSSSQVK|C(ITC[C])SLQAAAILDANDAHQTETSSSQVK|C(ITC[C])SLQAAAILDANDAHQTETSSSQVK|||C(ITC[C])SLQAAAILDANDAHQTETSSSQVK	2|3|5|2|1|||3	1.03|0.95|0.88|1.08|1.25|||1.02	0.02828|0.1222|0.06686|0.14142|NA|||0.02309	1.035	0.12629	16	6
Q9NQ88_215	TIGAR	TIGAR_HUMAN Fructose-2,6-bisphosphatase TIGAR OS=Homo sapiens OX=9606 GN=TIGAR PE=1 SV=1	C(ITC[C])SLPATLSR|C(ITC[C])SLPATLSR|C(ITC[C])SLPATLSR|C(ITC[C])SLPATLSR|C(ITC[C])SLPATLSR|C(ITC[C])SLPATLSR||	1|2|1|1|2|1||	1.13|1.145|0.96|0.88|0.97|1.12||	NA|0.0495|NA|NA|0.01414|NA||	1.03417	0.11155	8	6
Q7Z5K2_133	WAPL	WAPL_HUMAN Wings apart-like protein homolog OS=Homo sapiens OX=9606 GN=WAPL PE=1 SV=1	C(ITC[C])FPLEDTLLGK|C(ITC[C])FPLEDTLLGK|C(ITC[C])FPLEDTLLGK|C(ITC[C])FPLEDTLLGK|||C(ITC[C])FPLEDTLLGK|C(ITC[C])FPLEDTLLGK	4|6|3|5|||2|1	1.29|1.425|0.87|0.81|||0.975|0.83	0.19015|0.20605|0.03512|0.08503|||0.14849|NA	1.03333	0.26099	21	6
O95831_256	AIFM1	AIFM1_HUMAN Apoptosis-inducing factor 1, mitochondrial OS=Homo sapiens OX=9606 GN=AIFM1 PE=1 SV=1	C(ITC[C])LIATGGTPR|C(ITC[C])LIATGGTPR|C(ITC[C])LIATGGTPR|C(ITC[C])LIATGGTPR|C(ITC[C])LIATGGTPR|C(ITC[C])LIATGGTPR|C(ITC[C])LIATGGTPR|C(ITC[C])LIATGGTPR	5|5|4|4|2|1|1|1	1.33|1.32|0.78|0.81|1.02|1.01|0.86|1.13	0.21679|0.1176|0.065|0.06|0.07071|NA|NA|NA	1.0325	0.21526	23	8
Q68D10_535	SPTY2D1	SPT2_HUMAN Protein SPT2 homolog OS=Homo sapiens OX=9606 GN=SPTY2D1 PE=1 SV=3	C(ITC[C])TVVSETISSK|C(ITC[C])TVVSETISSK|C(ITC[C])TVVSETISSK|||||C(ITC[C])TVVSETISSK	3|2|1|||||1	1.01|1.14|1.09|||||0.89	0.02309|0.0|NA|||||NA	1.0325	0.10905	7	4
P46013_824	MKI67	KI67_HUMAN Proliferation marker protein Ki-67 OS=Homo sapiens OX=9606 GN=MKI67 PE=1 SV=2	|C(ITC[C])SASPPLR|C(ITC[C])SASPPLR|C(ITC[C])SASPPLR||C(ITC[C])SASPPLR||C(ITC[C])SASPPLR	|1|1|1||1||1	|1.57|0.82|0.96||0.89||0.92	|NA|NA|NA||NA||NA	1.032	0.30507	5	5
P78527_3187	PRKDC	PRKDC_HUMAN DNA-dependent protein kinase catalytic subunit OS=Homo sapiens OX=9606 GN=PRKDC PE=1 SV=3	C(ITC[C])FFLSK|C(ITC[C])FFLSK|C(ITC[C])FFLSK|C(ITC[C])FFLSK|C(ITC[C])FFLSK|C(ITC[C])FFLSK|C(ITC[C])FFLSK|C(ITC[C])FFLSK	8|8|4|6|8|6|4|7	1.675|1.615|0.66|0.66|1.015|1.03|0.82|0.78	0.20438|0.16449|0.02|0.01033|0.05345|0.08214|0.015|0.02268	1.03188	0.40335	51	8
Q9NTK5_55	OLA1	OLA1_HUMAN Obg-like ATPase 1 OS=Homo sapiens OX=9606 GN=OLA1 PE=1 SV=2	C(ITC[C])TIDPNESR|C(ITC[C])TIDPNESR|C(ITC[C])TIDPNESR||C(ITC[C])TIDPNESR||C(ITC[C])TIDPNESR|C(ITC[C])TIDPNESR	1|3|1||1||3|3	0.62|0.92|1.4||0.82||1.18|1.24	NA|0.17214|NA||NA||0.15948|0.14572	1.03	0.29251	12	6
O96013_58	PAK4	PAK4_HUMAN Serine/threonine-protein kinase PAK 4 OS=Homo sapiens OX=9606 GN=PAK4 PE=1 SV=1	C(ITC[C])ITSIQPGAPK|C(ITC[C])ITSIQPGAPK||C(ITC[C])ITSIQPGAPK||||	1|2||3||||	1.07|1.23||0.79||||	NA|0.04243||0.09815||||	1.03	0.22271	6	3
Q14690_361	PDCD11	RRP5_HUMAN Protein RRP5 homolog OS=Homo sapiens OX=9606 GN=PDCD11 PE=1 SV=3	C(ITC[C])QNLGAVLDDVPVQGFFK|C(ITC[C])QNLGAVLDDVPVQGFFK|||||C(ITC[C])QNLGAVLDDVPVQGFFK|	1|4|||||3|	1.26|0.93|||||0.9|	NA|0.28535|||||0.04619|	1.03	0.19975	8	3
Q15269_60	PWP2	PWP2_HUMAN Periodic tryptophan protein 2 homolog OS=Homo sapiens OX=9606 GN=PWP2 PE=2 SV=2	C(ITC[C])VGLSPDGR|C(ITC[C])VGLSPDGR||C(ITC[C])VGLSPDGR|C(ITC[C])VGLSPDGR||C(ITC[C])VGLSPDGR|C(ITC[C])VGLSPDGR	1|2||1|2||1|1	1.32|0.97||0.97|1.07||0.97|0.88	NA|0.02828||NA|0.04243||NA|NA	1.03	0.15427	8	6
O00567_112	NOP56	NOP56_HUMAN Nucleolar protein 56 OS=Homo sapiens OX=9606 GN=NOP56 PE=1 SV=4	C(ITC[C])QTGGVIAEILR|C(ITC[C])QTGGVIAEILR|C(ITC[C])QTGGVIAEILR|C(ITC[C])QTGGVIAEILR|||C(ITC[C])QTGGVIAEILR|C(ITC[C])QTGGVIAEILR	1|3|2|1|||2|2	1.14|1.17|1.01|0.97|||0.945|0.945	NA|0.16258|0.0|NA|||0.03536|0.07778	1.03	0.10015	11	6
A1L0T0_276	ILVBL	HACL2_HUMAN 2-hydroxyacyl-CoA lyase 2 OS=Homo sapiens OX=9606 GN=ILVBL PE=1 SV=2	|||C(ITC[C])VEILSR|C(ITC[C])VEILSR|C(ITC[C])VEILSR||	|||1|2|1||	|||0.75|1.195|1.14||	|||NA|0.02121|NA||	1.02833	0.24261	4	3
P20585_166	MSH3	MSH3_HUMAN DNA mismatch repair protein Msh3 OS=Homo sapiens OX=9606 GN=MSH3 PE=1 SV=4	C(ITC[C])TDFDDISLLHAK|C(ITC[C])TDFDDISLLHAK|C(ITC[C])TDFDDISLLHAK|C(ITC[C])TDFDDISLLHAK|C(ITC[C])TDFDDISLLHAK|C(ITC[C])TDFDDISLLHAK||	3|1|2|4|2|3||	1.61|0.73|0.805|0.81|1.17|1.04||	0.42736|NA|0.10607|0.11087|0.0|0.11547||	1.0275	0.33018	15	6
P18583_92	SON	SON_HUMAN Protein SON OS=Homo sapiens OX=9606 GN=SON PE=1 SV=4	C(ITC[C])VSVQTDPTDEIPTKK C(ITC[C])VSVQTDPTDEIPTK|C(ITC[C])VSVQTDPTDEIPTKK C(ITC[C])VSVQTDPTDEIPTK|C(ITC[C])VSVQTDPTDEIPTKK C(ITC[C])VSVQTDPTDEIPTK|C(ITC[C])VSVQTDPTDEIPTKK||||	7|6|6|4||||	0.71|0.67|1.41|1.315||||	0.11547|0.05707|3.07088|4.477||||	1.02625	0.39054	23	4
Q99733_77	NAP1L4	NP1L4_HUMAN Nucleosome assembly protein 1-like 4 OS=Homo sapiens OX=9606 GN=NAP1L4 PE=1 SV=1	C(ITC[C])AHIEAK|C(ITC[C])AHIEAK||C(ITC[C])AHIEAK|C(ITC[C])AHIEAK|||	2|1||1|1|||	1.205|1.38||0.81|0.71|||	0.07778|NA||NA|NA|||	1.02625	0.31826	5	4
P29372_61	MPG	3MG_HUMAN DNA-3-methyladenine glycosylase OS=Homo sapiens OX=9606 GN=MPG PE=1 SV=3	C(ITC[C])LGPPTTPGPYR|C(ITC[C])LGPPTTPGPYR|C(ITC[C])LGPPTTPGPYR|C(ITC[C])LGPPTTPGPYR|C(ITC[C])LGPPTTPGPYR|C(ITC[C])LGPPTTPGPYR|C(ITC[C])LGPPTTPGPYR|C(ITC[C])LGPPTTPGPYR	3|4|3|4|2|3|1|2	1.59|1.325|0.82|0.855|0.905|1.18|0.74|0.795	0.06658|0.1601|0.12702|0.01893|0.14849|0.17321|NA|0.06364	1.02625	0.30535	22	8
Q9Y3F4_305	STRAP	STRAP_HUMAN Serine-threonine kinase receptor-associated protein OS=Homo sapiens OX=9606 GN=STRAP PE=1 SV=1	C(ITC[C])VLPEEDSGELAKPK C(ITC[C])VLPEEDSGELAK|C(ITC[C])VLPEEDSGELAKPK C(ITC[C])VLPEEDSGELAK|C(ITC[C])VLPEEDSGELAKPK C(ITC[C])VLPEEDSGELAK|C(ITC[C])VLPEEDSGELAKPK|C(ITC[C])VLPEEDSGELAKPK|C(ITC[C])VLPEEDSGELAKPK|C(ITC[C])VLPEEDSGELAKPK|C(ITC[C])VLPEEDSGELAKPK	6|9|7|8|5|4|4|4	0.7|0.75|1.33|1.315|0.95|0.945|1.14|1.08	0.14841|0.21059|0.07678|0.09884|0.21778|0.11843|0.09106|0.13856	1.02625	0.23502	47	8
P78406_217	RAE1	RAE1L_HUMAN mRNA export factor OS=Homo sapiens OX=9606 GN=RAE1 PE=1 SV=1	C(ITC[C])VAIFK|C(ITC[C])VAIFK|C(ITC[C])VAIFK|C(ITC[C])VAIFK|C(ITC[C])VAIFK|C(ITC[C])VAIFK|C(ITC[C])VAIFK|C(ITC[C])VAIFK	2|4|4|6|3|4|2|2	0.995|1.075|0.865|0.955|1.31|1.005|1.06|0.945	0.06364|0.10231|0.05315|0.03488|0.03215|0.48999|0.02828|0.02121	1.02625	0.13263	27	8
P03243_393		E1B55_ADE05 E1B 55 kDa protein OS=Human adenovirus C serotype 5 OX=28285 PE=1 SV=1	C(ITC[C])SLHLGNR|C(ITC[C])SLHLGNR|C(ITC[C])SLHLGNR||C(ITC[C])SLHLGNR|C(ITC[C])SLHLGNR||	2|1|2||1|1||	1.04|1.04|0.86||1.19|1.0||	0.01414|NA|0.19799||NA|NA||	1.026	0.11781	7	5
Q12769_916	NUP160	NU160_HUMAN Nuclear pore complex protein Nup160 OS=Homo sapiens OX=9606 GN=NUP160 PE=1 SV=3	C(ITC[C])YLVTGEGQK|C(ITC[C])YLVTGEGQK||C(ITC[C])YLVTGEGQK||C(ITC[C])YLVTGEGQK|C(ITC[C])YLVTGEGQK|C(ITC[C])YLVTGEGQK	2|4||2||1|1|1	1.245|0.915||0.96||1.03|1.0|1.0	0.33234|0.06602||0.04243||NA|NA|NA	1.025	0.11489	11	6
Q9BTE6_210	AARSD1	AASD1_HUMAN Alanyl-tRNA editing protein Aarsd1 OS=Homo sapiens OX=9606 GN=AARSD1 PE=1 SV=2	||C(ITC[C])GTHVSNLSDLQVIK|C(ITC[C])GTHVSNLSDLQVIK||||C(ITC[C])GTHVSNLSDLQVIK	||1|1||||3	||0.81|1.36||||0.9	||NA|NA||||0.0	1.02333	0.29501	5	3
P52701_783	MSH6	MSH6_HUMAN DNA mismatch repair protein Msh6 OS=Homo sapiens OX=9606 GN=MSH6 PE=1 SV=2	||||C(ITC[C])NHYAINDR|C(ITC[C])NHYAINDR||C(ITC[C])NHYAINDR	||||1|1||1	||||1.08|0.83||1.16	||||NA|NA||NA	1.02333	0.17214	3	3
Q32MZ4_750	LRRFIP1	LRRF1_HUMAN Leucine-rich repeat flightless-interacting protein 1 OS=Homo sapiens OX=9606 GN=LRRFIP1 PE=1 SV=2	||C(ITC[C])EMSEHPSQTVR|C(ITC[C])EMSEHPSQTVR|C(ITC[C])EMSEHPSQTVR|||	||3|1|1|||	||1.01|0.99|1.07|||	||0.0|NA|NA|||	1.02333	0.04163	5	3
P48643_429	CCT5	TCPE_HUMAN T-complex protein 1 subunit epsilon OS=Homo sapiens OX=9606 GN=CCT5 PE=1 SV=1	||C(ITC[C])ALAVSQEADK|C(ITC[C])ALAVSQEADK|C(ITC[C])ALAVSQEADK|C(ITC[C])ALAVSQEADK|C(ITC[C])ALAVSQEADK|	||1|2|1|1|1|	||0.96|0.895|0.83|0.97|1.46|	||NA|0.02121|NA|NA|NA|	1.023	0.25069	6	5
O15226_424	NKRF	NKRF_HUMAN NF-kappa-B-repressing factor OS=Homo sapiens OX=9606 GN=NKRF PE=1 SV=2	C(ITC[C])HTGSSPR||C(ITC[C])HTGSSPR||||C(ITC[C])HTGSSPR|C(ITC[C])HTGSSPR	1||2||||2|1	1.15||1.13||||0.92|0.89	NA||0.0||||0.0|NA	1.0225	0.13647	6	4
O00571_298	DDX3X	DDX3X_HUMAN ATP-dependent RNA helicase DDX3X OS=Homo sapiens OX=9606 GN=DDX3X PE=1 SV=3	C(ITC[C])VVYGGADIGQQIR|C(ITC[C])VVYGGADIGQQIR|C(ITC[C])VVYGGADIGQQIR|C(ITC[C])VVYGGADIGQQIR||C(ITC[C])VVYGGADIGQQIR|C(ITC[C])VVYGGADIGQQIR|C(ITC[C])VVYGGADIGQQIR	1|1|2|1||2|2|1	1.52|1.44|0.735|0.62||1.02|0.98|0.84	NA|NA|0.13435|NA||0.0|0.11314|NA	1.02214	0.34195	10	7
P27708_868	CAD	PYR1_HUMAN CAD protein OS=Homo sapiens OX=9606 GN=CAD PE=1 SV=3	C(ITC[C])LGFSDK|C(ITC[C])LGFSDK|C(ITC[C])LGFSDK|C(ITC[C])LGFSDK|C(ITC[C])LGFSDK|C(ITC[C])LGFSDK|C(ITC[C])LGFSDK|C(ITC[C])LGFSDK	2|3|3|3|1|2|3|1	0.855|0.96|1.07|1.0|1.18|1.12|1.04|0.95	0.03536|0.03464|0.12124|0.02082|NA|0.09899|0.06245|NA	1.02187	0.10323	18	8
Q9H9Q4_253	NHEJ1	NHEJ1_HUMAN Non-homologous end-joining factor 1 OS=Homo sapiens OX=9606 GN=NHEJ1 PE=1 SV=1	|||C(ITC[C])VNQPEQLVSSAPTLSAPEK|||C(ITC[C])VNQPEQLVSSAPTLSAPEK|C(ITC[C])VNQPEQLVSSAPTLSAPEK	|||1|||2|1	|||0.91|||1.135|1.02	|||NA|||0.17678|NA	1.02167	0.11251	4	3
Q9Y6G9_247	DYNC1LI1	DC1L1_HUMAN Cytoplasmic dynein 1 light intermediate chain 1 OS=Homo sapiens OX=9606 GN=DYNC1LI1 PE=1 SV=3	C(ITC[C])DAISVLEK|C(ITC[C])DAISVLEK|||||C(ITC[C])DAISVLEK|	1|3|||||1|	1.19|1.27|||||0.6|	NA|0.16653|||||NA|	1.02	0.36592	5	3
Q9UBM1_70	PEMT	PEMT_HUMAN Phosphatidylethanolamine N-methyltransferase OS=Homo sapiens OX=9606 GN=PEMT PE=1 SV=4	|||||C(ITC[C])FTQAMLSQPR|C(ITC[C])FTQAMLSQPR|C(ITC[C])FTQAMLSQPR	|||||1|1|1	|||||1.16|0.65|1.25	|||||NA|NA|NA	1.02	0.32357	3	3
P52272_676	HNRNPM	HNRPM_HUMAN Heterogeneous nuclear ribonucleoprotein M OS=Homo sapiens OX=9606 GN=HNRNPM PE=1 SV=3	|C(ITC[C])GHVLYADIK|C(ITC[C])GHVLYADIK|C(ITC[C])GHVLYADIK|C(ITC[C])GHVLYADIK|C(ITC[C])GHVLYADIK||	|1|1|1|1|1||	|0.91|0.83|0.9|1.24|1.22||	|NA|NA|NA|NA|NA||	1.02	0.19429	5	5
Q9Y4W2_306	LAS1L	LAS1L_HUMAN Ribosomal biogenesis protein LAS1L OS=Homo sapiens OX=9606 GN=LAS1L PE=1 SV=2	||C(ITC[C])VLAELK|C(ITC[C])VLAELK|||C(ITC[C])VLAELK|C(ITC[C])VLAELK	||1|1|||1|2	||1.05|1.0|||0.88|1.15	||NA|NA|||NA|0.08485	1.02	0.11225	5	4
Q9UMS0_210	NFU1	NFU1_HUMAN NFU1 iron-sulfur cluster scaffold homolog, mitochondrial OS=Homo sapiens OX=9606 GN=NFU1 PE=1 SV=2	||C(ITC[C])TSCPSSIITLK|C(ITC[C])TSCPSSIITLK|C(ITC[C])TSCPSSIITLK|C(ITC[C])TSCPSSIITLK|C(ITC[C])TSCPSSIITLK|	||1|1|1|3|2|	||0.89|1.03|1.07|1.08|1.03|	||NA|NA|NA|0.20599|0.0|	1.02	0.07616	8	5
Q9Y678_325	COPG1	COPG1_HUMAN Coatomer subunit gamma-1 OS=Homo sapiens OX=9606 GN=COPG1 PE=1 SV=1	C(ITC[C])NLDLENLVTDSNR|||||C(ITC[C])NLDLENLVTDSNR|C(ITC[C])NLDLENLVTDSNR|C(ITC[C])NLDLENLVTDSNR	1|||||1|1|3	1.02|||||1.08|1.03|0.95	NA|||||NA|NA|0.0	1.02	0.05354	6	4
O60763_678	USO1	USO1_HUMAN General vesicular transport factor p115 OS=Homo sapiens OX=9606 GN=USO1 PE=1 SV=2	C(ITC[C])QNEQLQTAVTQQVSQIQQHK|C(ITC[C])QNEQLQTAVTQQVSQIQQHK|C(ITC[C])QNEQLQTAVTQQVSQIQQHK|C(ITC[C])QNEQLQTAVTQQVSQIQQHK|C(ITC[C])QNEQLQTAVTQQVSQIQQHK|C(ITC[C])QNEQLQTAVTQQVSQIQQHK||	1|5|1|1|2|1||	0.75|0.75|1.16|1.55|0.835|1.07||	NA|0.20957|NA|NA|0.03536|NA||	1.01917	0.31081	11	6
Q99496_179	RNF2	RING2_HUMAN E3 ubiquitin-protein ligase RING2 OS=Homo sapiens OX=9606 GN=RNF2 PE=1 SV=1	C(ITC[C])SNASTHSNQEAGPSNK|C(ITC[C])SNASTHSNQEAGPSNK|C(ITC[C])SNASTHSNQEAGPSNK|C(ITC[C])SNASTHSNQEAGPSNK||||	2|2|1|1||||	0.915|0.82|1.29|1.05||||	0.37477|0.0|NA|NA||||	1.01875	0.20398	6	4
Q9UHR5_172	SAP30BP	S30BP_HUMAN SAP30-binding protein OS=Homo sapiens OX=9606 GN=SAP30BP PE=1 SV=1	||C(ITC[C])AIDELGTNYPK|C(ITC[C])AIDELGTNYPK|||C(ITC[C])AIDELGTNYPK|C(ITC[C])AIDELGTNYPK	||2|3|||2|1	||1.005|0.93|||1.2|0.94	||0.03536|0.06658|||0.19799|NA	1.01875	0.12532	8	4
O94826_475	TOMM70	TOM70_HUMAN Mitochondrial import receptor subunit TOM70 OS=Homo sapiens OX=9606 GN=TOMM70 PE=1 SV=1	C(ITC[C])AEGYALYAQALTDQQQFGK|C(ITC[C])AEGYALYAQALTDQQQFGK||||||C(ITC[C])AEGYALYAQALTDQQQFGK	1|2||||||2	0.81|0.965||||||1.28	NA|0.00707||||||0.0	1.01833	0.2395	5	3
P15924_2259	DSP	DESP_HUMAN Desmoplakin OS=Homo sapiens OX=9606 GN=DSP PE=1 SV=3	C(ITC[C])IAGIYNETTK|||||C(ITC[C])IAGIYNETTK|C(ITC[C])IAGIYNETTK|C(ITC[C])IAGIYNETTK	1|||||1|1|1	0.98|||||0.82|1.01|1.26	NA|||||NA|NA|NA	1.0175	0.18191	4	4
Q96JM3_592	CHAMP1	CHAP1_HUMAN Chromosome alignment-maintaining phosphoprotein 1 OS=Homo sapiens OX=9606 GN=CHAMP1 PE=1 SV=2	|C(ITC[C])DILVQEELLASPK|C(ITC[C])DILVQEELLASPK||||C(ITC[C])DILVQEELLASPK|	|1|1||||1|	|0.94|1.31||||0.8|	|NA|NA||||NA|	1.01667	0.2635	3	3
Q5VYK3_814	ECPAS	ECM29_HUMAN Proteasome adapter and scaffold protein ECM29 OS=Homo sapiens OX=9606 GN=ECPAS PE=1 SV=2	|||C(ITC[C])TALGEIGR|C(ITC[C])TALGEIGR|C(ITC[C])TALGEIGR||	|||1|1|1||	|||0.87|1.11|1.07||	|||NA|NA|NA||	1.01667	0.12858	3	3
P48047_141	ATP5PO	ATPO_HUMAN ATP synthase subunit O, mitochondrial OS=Homo sapiens OX=9606 GN=ATP5PO PE=1 SV=1	||||C(ITC[C])TVTSASPLEEATLSELK||C(ITC[C])TVTSASPLEEATLSELK|C(ITC[C])TVTSASPLEEATLSELK	||||1||2|3	||||0.99||1.06|1.0	||||NA||0.0|0.20033	1.01667	0.03786	6	3
Q08J23_758	NSUN2	NSUN2_HUMAN RNA cytosine C(5)-methyltransferase NSUN2 OS=Homo sapiens OX=9606 GN=NSUN2 PE=1 SV=2	||||C(ITC[C])DPAGVHPPR|C(ITC[C])DPAGVHPPR|C(ITC[C])DPAGVHPPR|C(ITC[C])DPAGVHPPR	||||1|1|4|5	||||0.82|1.21|1.025|1.01	||||NA|NA|0.11902|0.01817	1.01625	0.15934	11	4
P18031_121	PTPN1	PTN1_HUMAN Tyrosine-protein phosphatase non-receptor type 1 OS=Homo sapiens OX=9606 GN=PTPN1 PE=1 SV=1	C(ITC[C])AQYWPQK|C(ITC[C])AQYWPQK|C(ITC[C])AQYWPQK|C(ITC[C])AQYWPQK|C(ITC[C])AQYWPQK|C(ITC[C])AQYWPQK|C(ITC[C])AQYWPQK|C(ITC[C])AQYWPQK	2|3|2|1|1|3|2|2	1.37|1.6|0.63|0.49|0.98|1.11|1.07|0.875	0.0|0.28618|0.0|NA|NA|0.1097|0.02828|0.13435	1.01562	0.36351	16	8
Q99714_91	HSD17B10	HCD2_HUMAN 3-hydroxyacyl-CoA dehydrogenase type-2 OS=Homo sapiens OX=9606 GN=HSD17B10 PE=1 SV=3	C(ITC[C])AGIAVASK|C(ITC[C])AGIAVASK|C(ITC[C])AGIAVASK|C(ITC[C])AGIAVASK|C(ITC[C])AGIAVASK|C(ITC[C])AGIAVASK|C(ITC[C])AGIAVASK|C(ITC[C])AGIAVASK	2|2|3|6|2|3|4|3	0.87|1.06|1.16|1.0|0.99|1.05|1.005|0.99	0.12728|0.08485|0.14844|0.16159|0.01414|0.01|0.01414|0.01528	1.01562	0.08183	25	8
P49189_220	ALDH9A1	AL9A1_HUMAN 4-trimethylaminobutyraldehyde dehydrogenase OS=Homo sapiens OX=9606 GN=ALDH9A1 PE=1 SV=3	C(ITC[C])QHPDVAK|C(ITC[C])QHPDVAK|C(ITC[C])QHPDVAK||C(ITC[C])QHPDVAK|C(ITC[C])QHPDVAK|C(ITC[C])QHPDVAK|C(ITC[C])QHPDVAK	1|1|1||1|5|3|4	0.7|0.96|1.19||0.81|0.98|1.18|1.285	NA|NA|NA||NA|0.09503|0.41525|0.21747	1.015	0.21457	16	7
Q14687_777	GSE1	GSE1_HUMAN Genetic suppressor element 1 OS=Homo sapiens OX=9606 GN=GSE1 PE=1 SV=3	C(ITC[C])VAEQPPLK|C(ITC[C])VAEQPPLK|C(ITC[C])VAEQPPLK|||C(ITC[C])VAEQPPLK||C(ITC[C])VAEQPPLK	1|2|2|||1||1	1.22|1.02|0.79|||0.93||1.11	NA|0.07071|0.02828|||NA||NA	1.014	0.16502	7	5
P62633_98	CNBP	CNBP_HUMAN Cellular nucleic acid-binding protein OS=Homo sapiens OX=9606 GN=CNBP PE=1 SV=1	CC(ITC[C])YNCGK|||CC(ITC[C])YNCGK|CC(ITC[C])YNCGK|||	1|||1|1|||	1.03|||1.35|0.66|||	NA|||NA|NA|||	1.01333	0.3453	3	3
Q8NI27_1111	THOC2	THOC2_HUMAN THO complex subunit 2 OS=Homo sapiens OX=9606 GN=THOC2 PE=1 SV=2	||||C(ITC[C])LETGEYTHIR|C(ITC[C])LETGEYTHIR||C(ITC[C])LETGEYTHIR	||||1|1||1	||||0.97|0.88||1.19	||||NA|NA||NA	1.01333	0.15948	3	3
Q08378_455	GOLGA3	GOGA3_HUMAN Golgin subfamily A member 3 OS=Homo sapiens OX=9606 GN=GOLGA3 PE=1 SV=2	||||C(ITC[C])SHSSQQR|C(ITC[C])SHSSQQR|C(ITC[C])SHSSQQR|	||||1|2|2|	||||1.03|1.12|0.89|	||||NA|0.0|0.0|	1.01333	0.1159	5	3
Q8WUM4_691	PDCD6IP	PDC6I_HUMAN Programmed cell death 6-interacting protein OS=Homo sapiens OX=9606 GN=PDCD6IP PE=1 SV=1	C(ITC[C])SDIVFAR|C(ITC[C])SDIVFAR|C(ITC[C])SDIVFAR|C(ITC[C])SDIVFAR|||C(ITC[C])SDIVFAR|C(ITC[C])SDIVFAR	2|1|1|1|||1|2	1.015|1.02|1.07|0.84|||1.17|0.965	0.09192|NA|NA|NA|||NA|0.03536	1.01333	0.10971	8	6
P05023_518	ATP1A1	AT1A1_HUMAN Sodium/potassium-transporting ATPase subunit alpha-1 OS=Homo sapiens OX=9606 GN=ATP1A1 PE=1 SV=1	C(ITC[C])SSILLHGK|C(ITC[C])SSILLHGK|C(ITC[C])SSILLHGK|C(ITC[C])SSILLHGK|C(ITC[C])SSILLHGK|C(ITC[C])SSILLHGK|C(ITC[C])SSILLHGK|C(ITC[C])SSILLHGK	6|7|12|14|3|5|10|10	1.53|1.61|0.665|0.66|0.98|1.09|0.78|0.79	0.04967|0.14519|0.05545|0.10021|0.01155|0.06834|0.04522|0.02111	1.01313	0.37425	67	8
P51580_165	TPMT	TPMT_HUMAN Thiopurine S-methyltransferase OS=Homo sapiens OX=9606 GN=TPMT PE=1 SV=1	|C(ITC[C])YADTMFSLLGK||C(ITC[C])YADTMFSLLGK|||C(ITC[C])YADTMFSLLGK|C(ITC[C])YADTMFSLLGK	|1||1|||1|1	|0.59||1.33|||1.29|0.84	|NA||NA|||NA|NA	1.0125	0.35874	4	4
P62888_92	RPL30	RL30_HUMAN 60S ribosomal protein L30 OS=Homo sapiens OX=9606 GN=RPL30 PE=1 SV=2	C(ITC[C])TLAIIDPGDSDIIR|C(ITC[C])TLAIIDPGDSDIIR||||C(ITC[C])TLAIIDPGDSDIIR|C(ITC[C])TLAIIDPGDSDIIR|	1|1||||2|2|	0.84|0.86||||1.39|0.96|	NA|NA||||0.0|0.0|	1.0125	0.25708	6	4
Q15029_674	EFTUD2	U5S1_HUMAN 116 kDa U5 small nuclear ribonucleoprotein component OS=Homo sapiens OX=9606 GN=EFTUD2 PE=1 SV=1	C(ITC[C])FAETPNKK C(ITC[C])FAETPNK|C(ITC[C])FAETPNKK C(ITC[C])FAETPNK|C(ITC[C])FAETPNKK C(ITC[C])FAETPNK|C(ITC[C])FAETPNKK C(ITC[C])FAETPNK||||	3|3|3|7||||	1.18|1.25|0.71|0.91||||	0.20502|0.26502|0.09609|0.07988||||	1.0125	0.24932	16	4
P78527_4106	PRKDC	PRKDC_HUMAN DNA-dependent protein kinase catalytic subunit OS=Homo sapiens OX=9606 GN=PRKDC PE=1 SV=3	C(ITC[C])LMDQATDPNILGR|C(ITC[C])LMDQATDPNILGR|C(ITC[C])LMDQATDPNILGR|C(ITC[C])LMDQATDPNILGR|C(ITC[C])LMDQATDPNILGR|C(ITC[C])LMDQATDPNILGR|C(ITC[C])LMDQATDPNILGR|C(ITC[C])LMDQATDPNILGR	11|10|10|9|5|5|9|7	1.37|1.39|0.78|0.87|0.98|0.99|0.85|0.87	0.19495|0.16236|0.04922|0.14521|0.20211|0.17712|0.1604|0.1009	1.0125	0.23693	66	8
P63010_857	AP2B1	AP2B1_HUMAN AP-2 complex subunit beta OS=Homo sapiens OX=9606 GN=AP2B1 PE=1 SV=1	|||C(ITC[C])HLNADTVSSK|C(ITC[C])HLNADTVSSK||C(ITC[C])HLNADTVSSK|C(ITC[C])HLNADTVSSK	|||1|1||1|1	|||0.95|0.94||1.03|1.13	|||NA|NA||NA|NA	1.0125	0.08808	4	4
P13797_463	PLS3	PLST_HUMAN Plastin-3 OS=Homo sapiens OX=9606 GN=PLS3 PE=1 SV=4	||||C(ITC[C])NYAVELGK|C(ITC[C])NYAVELGK|C(ITC[C])NYAVELGK|	||||2|1|1|	||||1.035|1.16|0.84|	||||0.07778|NA|NA|	1.01167	0.16127	4	3
O43172_441	PRPF4	PRP4_HUMAN U4/U6 small nuclear ribonucleoprotein Prp4 OS=Homo sapiens OX=9606 GN=PRPF4 PE=1 SV=2	C(ITC[C])VYTIPAHQNLVTGVK|C(ITC[C])VYTIPAHQNLVTGVK|C(ITC[C])VYTIPAHQNLVTGVK|C(ITC[C])VYTIPAHQNLVTGVK||||C(ITC[C])VYTIPAHQNLVTGVK	2|1|3|1||||2	1.08|0.98|1.01|0.99||||0.995	0.0|NA|0.0|NA||||0.17678	1.011	0.04006	9	5
Q06203_100	PPAT	PUR1_HUMAN Amidophosphoribosyltransferase OS=Homo sapiens OX=9606 GN=PPAT PE=1 SV=1	C(ITC[C])ELENCQPFVVETLHGK|C(ITC[C])ELENCQPFVVETLHGK|C(ITC[C])ELENCQPFVVETLHGK|C(ITC[C])ELENCQPFVVETLHGK|C(ITC[C])ELENCQPFVVETLHGK|C(ITC[C])ELENCQPFVVETLHGK|C(ITC[C])ELENCQPFVVETLHGK|C(ITC[C])ELENCQPFVVETLHGK	6|3|4|3|2|3|1|2	1.305|1.64|0.845|0.73|0.88|0.89|0.88|0.915	0.19343|0.27875|0.09845|0.11547|0.16971|0.0|NA|0.07778	1.01062	0.30397	24	8
Q9NZ63_145	C9orf78	TLS1_HUMAN Telomere length and silencing protein 1 homolog OS=Homo sapiens OX=9606 GN=C9orf78 PE=1 SV=1	|C(ITC[C])LYELPENIR|||||C(ITC[C])LYELPENIR|C(ITC[C])LYELPENIR	|1|||||1|1	|1.3|||||0.8|0.93	|NA|||||NA|NA	1.01	0.25942	3	3
Q9NP92_316	MRPS30	RT30_HUMAN 39S ribosomal protein S30, mitochondrial OS=Homo sapiens OX=9606 GN=MRPS30 PE=1 SV=2	C(ITC[C])ADQIEVVFR|C(ITC[C])ADQIEVVFR|||||C(ITC[C])ADQIEVVFR|	2|4|||||2|	1.16|1.075|||||0.795|	0.02828|0.05315|||||0.10607|	1.01	0.19098	8	3
Q14676_2021	MDC1	MDC1_HUMAN Mediator of DNA damage checkpoint protein 1 OS=Homo sapiens OX=9606 GN=MDC1 PE=1 SV=3	|||C(ITC[C])GGTYLPSMPR||C(ITC[C])GGTYLPSMPR|C(ITC[C])GGTYLPSMPR|	|||1||1|1|	|||1.14||1.09|0.8|	|||NA||NA|NA|	1.01	0.18358	3	3
P51659_189	HSD17B4	DHB4_HUMAN Peroxisomal multifunctional enzyme type 2 OS=Homo sapiens OX=9606 GN=HSD17B4 PE=1 SV=3	||C(ITC[C])NTIAPNAGSR||C(ITC[C])NTIAPNAGSR|||C(ITC[C])NTIAPNAGSR	||1||1|||1	||1.05||1.16|||0.82	||NA||NA|||NA	1.01	0.17349	3	3
Q05048_44	CSTF1	CSTF1_HUMAN Cleavage stimulation factor subunit 1 OS=Homo sapiens OX=9606 GN=CSTF1 PE=1 SV=1	||||C(ITC[C])APSEQLLHLIK||C(ITC[C])APSEQLLHLIK|C(ITC[C])APSEQLLHLIK	||||1||1|1	||||1.12||1.04|0.87	||||NA||NA|NA	1.01	0.12767	3	3
Q9UGV2_290	NDRG3	NDRG3_HUMAN Protein NDRG3 OS=Homo sapiens OX=9606 GN=NDRG3 PE=1 SV=2	C(ITC[C])GGLPQVVQPGK|C(ITC[C])GGLPQVVQPGK|C(ITC[C])GGLPQVVQPGK|C(ITC[C])GGLPQVVQPGK|C(ITC[C])GGLPQVVQPGK|C(ITC[C])GGLPQVVQPGK|C(ITC[C])GGLPQVVQPGK|C(ITC[C])GGLPQVVQPGK	3|4|4|5|5|5|8|4	1.5|1.025|0.815|0.87|1.03|1.03|0.94|0.865	0.1097|0.1242|0.06782|0.07649|0.08503|0.08337|0.20638|0.26721	1.00938	0.21536	38	8
O75616_150	ERAL1	ERAL1_HUMAN GTPase Era, mitochondrial OS=Homo sapiens OX=9606 GN=ERAL1 PE=1 SV=2	C(ITC[C])QALGVITEK|C(ITC[C])QALGVITEK|C(ITC[C])QALGVITEK|C(ITC[C])QALGVITEK|C(ITC[C])QALGVITEK|C(ITC[C])QALGVITEK|C(ITC[C])QALGVITEK|C(ITC[C])QALGVITEK	3|2|5|4|1|4|4|3	1.05|1.39|0.8|0.82|1.15|1.025|0.9|0.94	0.26312|0.49497|0.09798|0.01155|NA|0.10308|0.09535|0.03464	1.00938	0.19384	26	8
P18074_259	ERCC2	ERCC2_HUMAN General transcription and DNA repair factor IIH helicase subunit XPD OS=Homo sapiens OX=9606 GN=ERCC2 PE=1 SV=1	C(ITC[C])QGNLETLQK|C(ITC[C])QGNLETLQK|C(ITC[C])QGNLETLQK|C(ITC[C])QGNLETLQK|C(ITC[C])QGNLETLQK|C(ITC[C])QGNLETLQK|C(ITC[C])QGNLETLQK|C(ITC[C])QGNLETLQK	1|2|1|4|2|2|1|2	1.84|1.115|0.7|0.73|0.94|0.89|1.16|0.7	NA|0.19092|NA|0.0432|0.08485|0.07071|NA|0.0	1.00937	0.38029	15	8
Q15233_208	NONO	NONO_HUMAN Non-POU domain-containing octamer-binding protein OS=Homo sapiens OX=9606 GN=NONO PE=1 SV=4	C(ITC[C])SEGSFLLTTFPR|C(ITC[C])SEGSFLLTTFPR|C(ITC[C])SEGSFLLTTFPR|C(ITC[C])SEGSFLLTTFPR|C(ITC[C])SEGSFLLTTFPR|C(ITC[C])SEGSFLLTTFPR|C(ITC[C])SEGSFLLTTFPR|C(ITC[C])SEGSFLLTTFPR	10|9|6|4|4|3|3|4	1.195|1.3|0.94|0.86|1.05|1.08|0.77|0.875	0.22442|0.17186|0.02251|0.03304|0.42844|0.11719|0.05774|0.05228	1.00875	0.18049	43	8
Q86VP6_71	CAND1	CAND1_HUMAN Cullin-associated NEDD8-dissociated protein 1 OS=Homo sapiens OX=9606 GN=CAND1 PE=1 SV=2	C(ITC[C])LGPLVSK|C(ITC[C])LGPLVSK|C(ITC[C])LGPLVSK|C(ITC[C])LGPLVSK|C(ITC[C])LGPLVSK|C(ITC[C])LGPLVSK|C(ITC[C])LGPLVSK|C(ITC[C])LGPLVSK	8|7|3|2|2|2|2|1	0.845|0.89|1.16|1.16|0.94|1.02|1.015|1.04	0.05757|0.05398|0.16862|0.0|0.01414|0.01414|0.00707|NA	1.00875	0.11498	27	8
Q96SW2_310	CRBN	CRBN_HUMAN Protein cereblon OS=Homo sapiens OX=9606 GN=CRBN PE=1 SV=1	|C(ITC[C])ELDIMNK|C(ITC[C])ELDIMNK|C(ITC[C])ELDIMNK|C(ITC[C])ELDIMNK|C(ITC[C])ELDIMNK|C(ITC[C])ELDIMNK|	|1|5|1|1|1|1|	|0.81|1.38|0.94|0.84|1.05|1.03|	|NA|1.25897|NA|NA|NA|NA|	1.00833	0.20624	10	6
Q9Y3F4_340	STRAP	STRAP_HUMAN Serine-threonine kinase receptor-associated protein OS=Homo sapiens OX=9606 GN=STRAP PE=1 SV=1	C(ITC[C])IFPSAPDVK|C(ITC[C])IFPSAPDVK|||C(ITC[C])IFPSAPDVK|C(ITC[C])IFPSAPDVK|C(ITC[C])IFPSAPDVK|C(ITC[C])IFPSAPDVK	1|1|||1|1|2|1	1.06|1.11|||0.96|1.05|0.91|0.96	NA|NA|||NA|NA|0.12728|NA	1.00833	0.07627	7	6
P49327_1227	FASN	FAS_HUMAN Fatty acid synthase OS=Homo sapiens OX=9606 GN=FASN PE=1 SV=3	||C(ITC[C])LDTAVENMPSLK|C(ITC[C])LDTAVENMPSLK||C(ITC[C])LDTAVENMPSLK|C(ITC[C])LDTAVENMPSLK|C(ITC[C])LDTAVENMPSLK	||1|1||1|3|3	||0.97|0.89||1.05|1.17|0.96	||NA|NA||NA|2.05598|0.05774	1.008	0.10686	9	5
Q9BTE3_602	MCMBP	MCMBP_HUMAN Mini-chromosome maintenance complex-binding protein OS=Homo sapiens OX=9606 GN=MCMBP PE=1 SV=2	|C(ITC[C])LSLSAGQTTLSR|C(ITC[C])LSLSAGQTTLSR||C(ITC[C])LSLSAGQTTLSR|C(ITC[C])LSLSAGQTTLSR|C(ITC[C])LSLSAGQTTLSR|C(ITC[C])LSLSAGQTTLSR	|3|2||2|1|1|2	|1.26|0.985||1.045|1.01|0.84|0.905	|0.15044|0.07778||0.03536|NA|NA|0.02121	1.0075	0.14439	11	6
Q9BQG0_109	MYBBP1A	MBB1A_HUMAN Myb-binding protein 1A OS=Homo sapiens OX=9606 GN=MYBBP1A PE=1 SV=2	||||C(ITC[C])SILQQIQEK|C(ITC[C])SILQQIQEK|C(ITC[C])SILQQIQEK|C(ITC[C])SILQQIQEK	||||2|1|3|1	||||1.14|0.97|1.06|0.86	||||0.01414|NA|0.12124|NA	1.0075	0.12038	7	4
Q9BVP2_156	GNL3	GNL3_HUMAN Guanine nucleotide-binding protein-like 3 OS=Homo sapiens OX=9606 GN=GNL3 PE=1 SV=2	||||DPLGC(ITC[C])RCPQVEEAIVQSGQK|DPLGC(ITC[C])RCPQVEEAIVQSGQK|DPLGC(ITC[C])RCPQVEEAIVQSGQK|DPLGC(ITC[C])RCPQVEEAIVQSGQK	||||1|1|1|1	||||1.02|1.05|1.01|0.95	||||NA|NA|NA|NA	1.0075	0.04193	4	4
Q9Y296_195	TRAPPC4	TPPC4_HUMAN Trafficking protein particle complex subunit 4 OS=Homo sapiens OX=9606 GN=TRAPPC4 PE=1 SV=1	C(ITC[C])ELFDQNLK|C(ITC[C])ELFDQNLK|C(ITC[C])ELFDQNLK|C(ITC[C])ELFDQNLK|C(ITC[C])ELFDQNLK|C(ITC[C])ELFDQNLK|C(ITC[C])ELFDQNLK|	3|3|4|3|1|1|1|	1.38|1.24|0.82|0.82|0.98|0.87|0.94|	0.05774|0.08386|0.09522|0.04041|NA|NA|NA|	1.00714	0.21884	16	7
Q9BQG0_614	MYBBP1A	MBB1A_HUMAN Myb-binding protein 1A OS=Homo sapiens OX=9606 GN=MYBBP1A PE=1 SV=2	C(ITC[C])DLLGDIQTCIR|C(ITC[C])DLLGDIQTCIR|C(ITC[C])DLLGDIQTCIR|C(ITC[C])DLLGDIQTCIR|||C(ITC[C])DLLGDIQTCIR|C(ITC[C])DLLGDIQTCIR	2|3|4|2|||2|1	1.36|1.15|0.895|0.82|||0.865|0.95	0.0|0.62642|0.00957|0.12728|||0.00707|NA	1.00667	0.20784	14	6
Q9UKX7_181	NUP50	NUP50_HUMAN Nuclear pore complex protein Nup50 OS=Homo sapiens OX=9606 GN=NUP50 PE=1 SV=2	||||C(ITC[C])DLTPIFK||C(ITC[C])DLTPIFK|C(ITC[C])DLTPIFK	||||1||1|3	||||1.18||0.92|0.92	||||NA||NA|0.06928	1.00667	0.15011	5	3
Q14318_274	FKBP8	FKBP8_HUMAN Peptidyl-prolyl cis-trans isomerase FKBP8 OS=Homo sapiens OX=9606 GN=FKBP8 PE=1 SV=2	C(ITC[C])LNNLAASQLK|C(ITC[C])LNNLAASQLK|C(ITC[C])LNNLAASQLK|C(ITC[C])LNNLAASQLK|C(ITC[C])LNNLAASQLK|C(ITC[C])LNNLAASQLK|C(ITC[C])LNNLAASQLK|C(ITC[C])LNNLAASQLK	3|1|3|4|5|3|4|5	1.43|1.61|0.72|0.68|0.96|1.01|0.81|0.83	0.32234|NA|0.03512|0.075|0.01789|0.03464|0.10012|0.03391	1.00625	0.33895	28	8
Q9NVA2_46	SEPTIN11	SEP11_HUMAN Septin-11 OS=Homo sapiens OX=9606 GN=SEPTIN11 PE=1 SV=3	||||C(ITC[C])VGETGIGK|C(ITC[C])VGETGIGK|C(ITC[C])VGETGIGK|C(ITC[C])VGETGIGK	||||2|2|1|2	||||0.99|1.05|1.02|0.965	||||0.0|0.01414|NA|0.03536	1.00625	0.03683	7	4
Q99700_301	ATXN2	ATX2_HUMAN Ataxin-2 OS=Homo sapiens OX=9606 GN=ATXN2 PE=1 SV=2	C(ITC[C])DLVLDAAHEK||C(ITC[C])DLVLDAAHEK|C(ITC[C])DLVLDAAHEK||||	3||1|2||||	1.1||0.89|1.025||||	0.08083||NA|0.00707||||	1.005	0.10642	6	3
P61978_132	HNRNPK	HNRPK_HUMAN Heterogeneous nuclear ribonucleoprotein K OS=Homo sapiens OX=9606 GN=HNRNPK PE=1 SV=1	C(ITC[C])LNYQHYK|C(ITC[C])LNYQHYK|C(ITC[C])LNYQHYK|C(ITC[C])LNYQHYK|C(ITC[C])LNYQHYK|C(ITC[C])LNYQHYK|C(ITC[C])LNYQHYK|C(ITC[C])LNYQHYK	1|1|1|2|3|2|2|2	1.1|1.07|0.77|0.83|0.96|1.04|1.335|0.93	NA|NA|NA|0.11314|0.27713|0.16971|0.44548|0.04243	1.00438	0.17602	14	8
Q9NRL3_337	STRN4	STRN4_HUMAN Striatin-4 OS=Homo sapiens OX=9606 GN=STRN4 PE=1 SV=2	|C(ITC[C])TVDGSPHELESR|C(ITC[C])TVDGSPHELESR|C(ITC[C])TVDGSPHELESR|||C(ITC[C])TVDGSPHELESR|C(ITC[C])TVDGSPHELESR	|3|1|3|||1|2	|0.92|1.13|1.01|||1.11|0.85	|0.04933|NA|0.0|||NA|0.0	1.004	0.12033	10	5
P30153_390	PPP2R1A	2AAA_HUMAN Serine/threonine-protein phosphatase 2A 65 kDa regulatory subunit A alpha isoform OS=Homo sapiens OX=9606 GN=PPP2R1A PE=1 SV=4	C(ITC[C])VNEVIGIR|C(ITC[C])VNEVIGIR||||C(ITC[C])VNEVIGIR||C(ITC[C])VNEVIGIR	2|2||||2||1	1.22|1.225||||0.91||0.66	0.02828|0.16263||||0.11314||NA	1.00375	0.27244	7	4
P14866_581	HNRNPL	HNRPL_HUMAN Heterogeneous nuclear ribonucleoprotein L OS=Homo sapiens OX=9606 GN=HNRNPL PE=1 SV=2	C(ITC[C])FSTAQHAS|C(ITC[C])FSTAQHAS|C(ITC[C])FSTAQHAS|C(ITC[C])FSTAQHAS|C(ITC[C])FSTAQHAS|C(ITC[C])FSTAQHAS LC(ITC[C])FSTAQHAS|C(ITC[C])FSTAQHAS|C(ITC[C])FSTAQHAS	2|4|4|3|3|4|4|4	0.665|0.685|1.245|1.22|1.01|1.015|1.115|1.075	0.02121|0.0263|0.03873|0.09815|0.10693|0.12393|0.1036|0.03317	1.00375	0.22004	28	8
P41252_185	IARS1	SYIC_HUMAN Isoleucine--tRNA ligase, cytoplasmic OS=Homo sapiens OX=9606 GN=IARS1 PE=1 SV=2	C(ITC[C])NTPLSNFESHQNYK||C(ITC[C])NTPLSNFESHQNYK|C(ITC[C])NTPLSNFESHQNYK|C(ITC[C])NTPLSNFESHQNYK|C(ITC[C])NTPLSNFESHQNYK|C(ITC[C])NTPLSNFESHQNYK|C(ITC[C])NTPLSNFESHQNYK	3||3|2|3|4|4|5	1.37||0.88|0.94|1.07|1.02|0.925|0.82	0.09074||0.02887|0.07071|0.08083|0.1686|0.08221|0.28148	1.00357	0.18172	24	7
Q8TAQ2_80	SMARCC2	SMRC2_HUMAN SWI/SNF complex subunit SMARCC2 OS=Homo sapiens OX=9606 GN=SMARCC2 PE=1 SV=1	C(ITC[C])FLDFK|C(ITC[C])FLDFK||C(ITC[C])FLDFK||||	1|1||5||||	0.83|0.84||1.34||||	NA|NA||0.14078||||	1.00333	0.2916	7	3
P35579_671	MYH9	MYH9_HUMAN Myosin-9 OS=Homo sapiens OX=9606 GN=MYH9 PE=1 SV=4	|||C(ITC[C])IIPNHEK|||C(ITC[C])IIPNHEK|C(ITC[C])IIPNHEK	|||3|||1|1	|||1.18|||0.99|0.84	|||0.35303|||NA|NA	1.00333	0.17039	5	3
P22102_733	GART	PUR2_HUMAN Trifunctional purine biosynthetic protein adenosine-3 OS=Homo sapiens OX=9606 GN=GART PE=1 SV=1	C(ITC[C])GVGAVLVVSK||C(ITC[C])GVGAVLVVSK|C(ITC[C])GVGAVLVVSK|C(ITC[C])GVGAVLVVSK||C(ITC[C])GVGAVLVVSK|C(ITC[C])GVGAVLVVSK	1||1|1|2||1|2	1.26||1.03|0.9|0.965||0.78|1.085	NA||NA|NA|0.41719||NA|0.13435	1.00333	0.16449	8	6
A0AVT1_17	UBA6	UBA6_HUMAN Ubiquitin-like modifier-activating enzyme 6 OS=Homo sapiens OX=9606 GN=UBA6 PE=1 SV=1	|||C(ITC[C])SSWGTGSTNK|||C(ITC[C])SSWGTGSTNK|C(ITC[C])SSWGTGSTNK	|||2|||1|1	|||0.98|||1.08|0.95	|||0.0|||NA|NA	1.00333	0.06807	4	3
Q14839_1827	CHD4	CHD4_HUMAN Chromodomain-helicase-DNA-binding protein 4 OS=Homo sapiens OX=9606 GN=CHD4 PE=1 SV=2	|||||C(ITC[C])LAESHQHLSK|C(ITC[C])LAESHQHLSK|C(ITC[C])LAESHQHLSK	|||||1|1|1	|||||0.97|1.0|1.04	|||||NA|NA|NA	1.00333	0.03512	3	3
Q9NRN7_296	AASDHPPT	ADPPT_HUMAN L-aminoadipate-semialdehyde dehydrogenase-phosphopantetheinyl transferase OS=Homo sapiens OX=9606 GN=AASDHPPT PE=1 SV=2	||||C(ITC[C])FTEEIPIR||C(ITC[C])FTEEIPIR|C(ITC[C])FTEEIPIR	||||1||1|1	||||0.98||1.0|1.03	||||NA||NA|NA	1.00333	0.02517	3	3
Q4VCS5_741	AMOT	AMOT_HUMAN Angiomotin OS=Homo sapiens OX=9606 GN=AMOT PE=1 SV=1	C(ITC[C])LDMEGR|C(ITC[C])LDMEGR|C(ITC[C])LDMEGR|C(ITC[C])LDMEGR||C(ITC[C])LDMEGR||	3|2|5|3||1||	1.07|1.085|0.96|0.8||1.1||	0.14933|0.02121|0.07668|0.04933||NA||	1.003	0.12617	14	5
Q16543_336	CDC37	CDC37_HUMAN Hsp90 co-chaperone Cdc37 OS=Homo sapiens OX=9606 GN=CDC37 PE=1 SV=1	C(ITC[C])IDSGLWVPNSK|C(ITC[C])IDSGLWVPNSK|C(ITC[C])IDSGLWVPNSK|C(ITC[C])IDSGLWVPNSK|C(ITC[C])IDSGLWVPNSK||C(ITC[C])IDSGLWVPNSK|C(ITC[C])IDSGLWVPNSK	1|2|4|2|1||2|2	0.65|0.78|1.32|1.13|0.87||0.975|1.295	NA|0.0|0.04082|0.0|NA||0.03536|0.06364	1.00286	0.25648	14	7
P07814_744	EPRS1	SYEP_HUMAN Bifunctional glutamate/proline--tRNA ligase OS=Homo sapiens OX=9606 GN=EPRS1 PE=1 SV=5	C(ITC[C])TTSEDSLVLYNR|C(ITC[C])TTSEDSLVLYNR|C(ITC[C])TTSEDSLVLYNR|C(ITC[C])TTSEDSLVLYNR|C(ITC[C])TTSEDSLVLYNR||C(ITC[C])TTSEDSLVLYNR|C(ITC[C])TTSEDSLVLYNR	3|3|1|2|1||1|1	0.85|0.73|1.02|1.15|0.9||1.32|1.05	0.08083|0.04041|NA|0.07071|NA||NA|NA	1.00286	0.19712	12	7
P16730_72	UL87	UL87_HCMVA Protein UL87 OS=Human cytomegalovirus (strain AD169) OX=10360 GN=UL87 PE=3 SV=1	AC(ITC[C])PIHVR|AC(ITC[C])PIHVR||AC(ITC[C])PIHVR|AC(ITC[C])PIHVR|||	2|3||1|1|||	0.81|0.98||1.51|0.71|||	0.16971|0.15885||NA|NA|||	1.0025	0.35622	7	4
O95747_53	OXSR1	OXSR1_HUMAN Serine/threonine-protein kinase OSR1 OS=Homo sapiens OX=9606 GN=OXSR1 PE=1 SV=1	C(ITC[C])QTSMDELLK|C(ITC[C])QTSMDELLK|||C(ITC[C])QTSMDELLK|C(ITC[C])QTSMDELLK||	3|3|||5|3||	1.23|1.17|||0.87|0.74||	0.01732|0.18735|||0.0757|0.04041||	1.0025	0.23543	14	4
O95478_193	NSA2	NSA2_HUMAN Ribosome biogenesis protein NSA2 homolog OS=Homo sapiens OX=9606 GN=NSA2 PE=1 SV=1	C(ITC[C])LPILGVK|C(ITC[C])LPILGVK|C(ITC[C])LPILGVK|C(ITC[C])LPILGVK|C(ITC[C])LPILGVK|C(ITC[C])LPILGVK|C(ITC[C])LPILGVK|C(ITC[C])LPILGVK	1|2|1|4|3|2|5|4	1.24|1.195|0.74|0.74|1.12|1.08|1.04|0.865	NA|0.28991|NA|0.09201|0.04041|0.12728|0.17225|0.06397	1.0025	0.1969	22	8
Q8TD19_626	NEK9	NEK9_HUMAN Serine/threonine-protein kinase Nek9 OS=Homo sapiens OX=9606 GN=NEK9 PE=1 SV=2	C(ITC[C])GQLGVGNYK||C(ITC[C])GQLGVGNYK|C(ITC[C])GQLGVGNYK|C(ITC[C])GQLGVGNYK|||	1||1|3|1|||	0.78||1.24|0.99|1.0|||	NA||NA|0.09292|NA|||	1.0025	0.18804	6	4
P22314_278	UBA1	UBA1_HUMAN Ubiquitin-like modifier-activating enzyme 1 OS=Homo sapiens OX=9606 GN=UBA1 PE=1 SV=3	|C(ITC[C])DTSNFSDYIR|C(ITC[C])DTSNFSDYIR|C(ITC[C])DTSNFSDYIR|C(ITC[C])DTSNFSDYIR||C(ITC[C])DTSNFSDYIR|C(ITC[C])DTSNFSDYIR	|1|1|1|3||1|2	|1.15|1.01|1.02|0.98||0.89|0.965	|NA|NA|NA|0.00577||NA|0.00707	1.0025	0.08566	9	6
P33240_150	CSTF2	CSTF2_HUMAN Cleavage stimulation factor subunit 2 OS=Homo sapiens OX=9606 GN=CSTF2 PE=1 SV=1	C(ITC[C])VQNSPQEAR|C(ITC[C])VQNSPQEAR|C(ITC[C])VQNSPQEAR||C(ITC[C])VQNSPQEAR|C(ITC[C])VQNSPQEAR|C(ITC[C])VQNSPQEAR|C(ITC[C])VQNSPQEAR	1|3|1||2|2|1|1	0.98|0.91|1.06||0.93|0.875|1.1|1.16	NA|0.09238|NA||0.01414|0.06364|NA|NA	1.00214	0.10661	11	7
P33992_397	MCM5	MCM5_HUMAN DNA replication licensing factor MCM5 OS=Homo sapiens OX=9606 GN=MCM5 PE=1 SV=5	C(ITC[C])SPIGVYTSGK|C(ITC[C])SPIGVYTSGK|C(ITC[C])SPIGVYTSGK|C(ITC[C])SPIGVYTSGK|C(ITC[C])SPIGVYTSGK|C(ITC[C])SPIGVYTSGK|C(ITC[C])SPIGVYTSGK|C(ITC[C])SPIGVYTSGK	6|4|4|5|5|3|1|2	1.38|1.07|0.825|0.87|1.04|1.01|0.86|0.96	0.12485|0.085|0.08266|0.11576|0.05273|0.06928|NA|0.11314	1.00188	0.17716	30	8
P55209_88	NAP1L1	NP1L1_HUMAN Nucleosome assembly protein 1-like 1 OS=Homo sapiens OX=9606 GN=NAP1L1 PE=1 SV=1	C(ITC[C])AQIEAK|C(ITC[C])AQIEAK|C(ITC[C])AQIEAK|C(ITC[C])AQIEAK|C(ITC[C])AQIEAK|C(ITC[C])AQIEAK|C(ITC[C])AQIEAK|C(ITC[C])AQIEAK	5|7|2|6|3|5|3|3	1.18|1.21|0.855|0.91|0.97|0.9|0.94|1.05	0.12256|0.0378|0.00707|0.06532|0.09539|0.03033|0.06351|0.01	1.00188	0.13234	34	8
O94979_1130	SEC31A	SC31A_HUMAN Protein transport protein Sec31A OS=Homo sapiens OX=9606 GN=SEC31A PE=1 SV=3	|C(ITC[C])LSSATDPQTK|C(ITC[C])LSSATDPQTK|C(ITC[C])LSSATDPQTK|C(ITC[C])LSSATDPQTK||C(ITC[C])LSSATDPQTK|C(ITC[C])LSSATDPQTK	|1|1|1|2||4|1	|1.2|0.92|0.9|1.09||0.9|1.0	|NA|NA|NA|0.04243||0.015|NA	1.00167	0.12205	10	6
Q9NP92_33	MRPS30	RT30_HUMAN 39S ribosomal protein S30, mitochondrial OS=Homo sapiens OX=9606 GN=MRPS30 PE=1 SV=2	C(ITC[C])QDVAATPVAR|C(ITC[C])QDVAATPVAR|C(ITC[C])QDVAATPVAR|C(ITC[C])QDVAATPVAR|C(ITC[C])QDVAATPVAR||C(ITC[C])QDVAATPVAR|	2|5|2|4|3||2|	1.14|0.91|1.04|0.905|0.9||1.115|	0.0|0.08396|0.0|0.11387|0.01732||0.03536|	1.00167	0.11094	18	6
P20700_198	LMNB1	LMNB1_HUMAN Lamin-B1 OS=Homo sapiens OX=9606 GN=LMNB1 PE=1 SV=2	C(ITC[C])QSLTEDLEFR|C(ITC[C])QSLTEDLEFR|C(ITC[C])QSLTEDLEFR|C(ITC[C])QSLTEDLEFR||C(ITC[C])QSLTEDLEFR||C(ITC[C])QSLTEDLEFR	3|4|3|1||1||1	1.06|1.01|0.99|1.11||0.96||0.88	0.02309|0.02363|0.05686|NA||NA||NA	1.00167	0.07985	13	6
P38919_140	EIF4A3	IF4A3_HUMAN Eukaryotic initiation factor 4A-III OS=Homo sapiens OX=9606 GN=EIF4A3 PE=1 SV=4	||C(ITC[C])IGGTNVGEDIR|C(ITC[C])IGGTNVGEDIR|C(ITC[C])IGGTNVGEDIR|C(ITC[C])IGGTNVGEDIR|C(ITC[C])IGGTNVGEDIR|C(ITC[C])IGGTNVGEDIR	||1|1|1|2|1|1	||0.93|1.09|0.91|0.98|1.0|1.1	||NA|NA|NA|0.14142|NA|NA	1.00167	0.07935	7	6
Q15149_4071	PLEC	PLEC_HUMAN Plectin OS=Homo sapiens OX=9606 GN=PLEC PE=1 SV=3	||C(ITC[C])IAGVFVDATK||||C(ITC[C])IAGVFVDATK|C(ITC[C])IAGVFVDATK	||2||||2|1	||0.975||||1.05|0.98	||0.07778||||0.0|NA	1.00167	0.04193	5	3
P17987_218	TCP1	TCPA_HUMAN T-complex protein 1 subunit alpha OS=Homo sapiens OX=9606 GN=TCP1 PE=1 SV=1	|C(ITC[C])VVGSQGMPK||C(ITC[C])VVGSQGMPK|C(ITC[C])VVGSQGMPK|C(ITC[C])VVGSQGMPK|C(ITC[C])VVGSQGMPK|C(ITC[C])VVGSQGMPK	|2||2|1|1|2|2	|0.735||1.22|0.95|0.99|0.955|1.155	|0.72832||0.0|NA|NA|0.0495|0.14849	1.00083	0.17162	10	6
Q9NVP1_183	DDX18	DDX18_HUMAN ATP-dependent RNA helicase DDX18 OS=Homo sapiens OX=9606 GN=DDX18 PE=1 SV=2	||C(ITC[C])NLVNENTLK|C(ITC[C])NLVNENTLK|C(ITC[C])NLVNENTLK|C(ITC[C])NLVNENTLK|C(ITC[C])NLVNENTLK|C(ITC[C])NLVNENTLK	||2|1|2|1|2|2	||0.95|1.09|0.995|0.9|1.06|1.01	||0.04243|NA|0.14849|NA|0.09899|0.0	1.00083	0.06974	10	6
P04637_182	TP53	P53_HUMAN Cellular tumor antigen p53 OS=Homo sapiens OX=9606 GN=TP53 PE=1 SV=4	C(ITC[C])SDSDGLAPPQHLIR|C(ITC[C])SDSDGLAPPQHLIR|C(ITC[C])SDSDGLAPPQHLIR|C(ITC[C])SDSDGLAPPQHLIR|C(ITC[C])SDSDGLAPPQHLIR|C(ITC[C])SDSDGLAPPQHLIR|C(ITC[C])SDSDGLAPPQHLIR|C(ITC[C])SDSDGLAPPQHLIR	6|6|10|10|10|9|6|9	1.085|1.06|0.97|1.0|0.95|0.99|0.98|0.97	0.36513|0.07746|0.07391|0.05292|0.04551|0.04301|0.0946|0.08124	1.00063	0.04724	66	8
Q14353_16	GAMT	GAMT_HUMAN Guanidinoacetate N-methyltransferase OS=Homo sapiens OX=9606 GN=GAMT PE=1 SV=1	|C(ITC[C])SPAWGAAPAAYDAADTHLR||C(ITC[C])SPAWGAAPAAYDAADTHLR|C(ITC[C])SPAWGAAPAAYDAADTHLR|C(ITC[C])SPAWGAAPAAYDAADTHLR||	|1||3|1|1||	|1.12||0.78|0.83|1.27||	|NA||0.06506|NA|NA||	1	0.23424	6	4
Q9NQG6_251	MIEF1	MID51_HUMAN Mitochondrial dynamics protein MID51 OS=Homo sapiens OX=9606 GN=MIEF1 PE=1 SV=1	||C(ITC[C])VVGGYLSPK||C(ITC[C])VVGGYLSPK|C(ITC[C])VVGGYLSPK|C(ITC[C])VVGGYLSPK|	||1||1|1|1|	||0.8||1.28|0.88|1.04|	||NA||NA|NA|NA|	1	0.21166	4	4
Q86UP2_303	KTN1	KTN1_HUMAN Kinectin OS=Homo sapiens OX=9606 GN=KTN1 PE=1 SV=1	||C(ITC[C])VVDLLK|C(ITC[C])VVDLLK|||C(ITC[C])VVDLLK|C(ITC[C])VVDLLK	||1|1|||1|1	||1.11|1.19|||0.74|0.96	||NA|NA|||NA|NA	1	0.19782	4	4
O15270_438	SPTLC2	SPTC2_HUMAN Serine palmitoyltransferase 2 OS=Homo sapiens OX=9606 GN=SPTLC2 PE=1 SV=1	|C(ITC[C])VQQLAENTR|||C(ITC[C])VQQLAENTR||C(ITC[C])VQQLAENTR|	|1|||1||2|	|1.16|||1.05||0.79|	|NA|||NA||0.0|	1	0.19	4	3
P11908_165	PRPS2	PRPS2_HUMAN Ribose-phosphate pyrophosphokinase 2 OS=Homo sapiens OX=9606 GN=PRPS2 PE=1 SV=2	||C(ITC[C])IIVSPDAGGAK||C(ITC[C])IIVSPDAGGAK|C(ITC[C])IIVSPDAGGAK||	||1||1|1||	||0.79||1.07|1.14||	||NA||NA|NA||	1	0.1852	3	3
Q9UHD8_248	SEPTIN9	SEPT9_HUMAN Septin-9 OS=Homo sapiens OX=9606 GN=SEPTIN9 PE=1 SV=2	||||C(ITC[C])VGDMADTPR|C(ITC[C])VGDMADTPR|C(ITC[C])VGDMADTPR|	||||1|1|1|	||||1.11|0.98|0.91|	||||NA|NA|NA|	1	0.10149	3	3
P19367_886	HK1	HXK1_HUMAN Hexokinase-1 OS=Homo sapiens OX=9606 GN=HK1 PE=1 SV=3	C(ITC[C])NVSFLLSEDGSGK|C(ITC[C])NVSFLLSEDGSGK|C(ITC[C])NVSFLLSEDGSGK|C(ITC[C])NVSFLLSEDGSGK|C(ITC[C])NVSFLLSEDGSGK|C(ITC[C])NVSFLLSEDGSGK||C(ITC[C])NVSFLLSEDGSGK	1|4|2|1|1|1||3	0.98|0.905|1.085|1.11|1.08|0.94||0.9	NA|0.03304|0.0495|NA|NA|NA||0.1179	1	0.09014	13	7
P04075_202	ALDOA	ALDOA_HUMAN Fructose-bisphosphate aldolase A OS=Homo sapiens OX=9606 GN=ALDOA PE=1 SV=2	|C(ITC[C])QYVTEK|||C(ITC[C])QYVTEK|C(ITC[C])QYVTEK|C(ITC[C])QYVTEK|C(ITC[C])QYVTEK	|8|||3|1|1|2	|1.16|||1.03|0.96|0.88|0.965	|0.11276|||0.0|NA|NA|0.13435	0.999	0.10455	15	5
Q6P2Q9_435	PRPF8	PRP8_HUMAN Pre-mRNA-processing-splicing factor 8 OS=Homo sapiens OX=9606 GN=PRPF8 PE=1 SV=2	|C(ITC[C])PAGQPVK|C(ITC[C])PAGQPVK|C(ITC[C])PAGQPVK||||C(ITC[C])PAGQPVK	|2|1|2||||1	|0.6|1.16|1.115||||1.12	|0.0|NA|0.02121||||NA	0.99875	0.2666	6	4
Q04206_109	RELA	TF65_HUMAN Transcription factor p65 OS=Homo sapiens OX=9606 GN=RELA PE=1 SV=2	C(ITC[C])IHSFQNLGIQCVK|C(ITC[C])IHSFQNLGIQCVK|C(ITC[C])IHSFQNLGIQCVK|C(ITC[C])IHSFQNLGIQCVK||||	3|1|1|1||||	1.21|0.98|0.98|0.82||||	0.33151|NA|NA|NA||||	0.9975	0.16049	6	4
P26641_194	EEF1G	EF1G_HUMAN Elongation factor 1-gamma OS=Homo sapiens OX=9606 GN=EEF1G PE=1 SV=3	C(ITC[C])INQPQFR|C(ITC[C])INQPQFR|C(ITC[C])INQPQFR|C(ITC[C])INQPQFR|C(ITC[C])INQPQFR|C(ITC[C])INQPQFR|C(ITC[C])INQPQFR|C(ITC[C])INQPQFR	2|2|1|2|3|3|4|3	1.08|1.05|0.94|0.91|1.02|1.1|0.92|0.96	0.01414|0.0|NA|0.0|0.07767|0.1893|0.01|0.01528	0.9975	0.07459	20	8
Q01081_102	U2AF1	U2AF1_HUMAN Splicing factor U2AF 35 kDa subunit OS=Homo sapiens OX=9606 GN=U2AF1 PE=1 SV=3	|C(ITC[C])DNLGDHLVGNVYVK|C(ITC[C])DNLGDHLVGNVYVK|||C(ITC[C])DNLGDHLVGNVYVK||	|1|1|||1||	|1.35|0.7|||0.94||	|NA|NA|||NA||	0.99667	0.32868	3	3
O94804_888	STK10	STK10_HUMAN Serine/threonine-protein kinase 10 OS=Homo sapiens OX=9606 GN=STK10 PE=1 SV=1	C(ITC[C])HLLVEHETQK||C(ITC[C])HLLVEHETQK|C(ITC[C])HLLVEHETQK|C(ITC[C])HLLVEHETQK|C(ITC[C])HLLVEHETQK||C(ITC[C])HLLVEHETQK	4||6|3|3|2||1	0.875||1.045|0.96|1.05|1.13||0.92	0.10874||0.13003|0.03606|0.14933|0.0||NA	0.99667	0.09485	19	6
Q9H6F5_127	CCDC86	CCD86_HUMAN Coiled-coil domain-containing protein 86 OS=Homo sapiens OX=9606 GN=CCDC86 PE=1 SV=1	C(ITC[C])SQDQGVLASELAQNK|C(ITC[C])SQDQGVLASELAQNK|C(ITC[C])SQDQGVLASELAQNK|||||	2|1|2|||||	0.98|1.0|1.01|||||	0.08485|NA|0.08485|||||	0.99667	0.01528	5	3
Q15021_286	NCAPD2	CND1_HUMAN Condensin complex subunit 1 OS=Homo sapiens OX=9606 GN=NCAPD2 PE=1 SV=3	C(ITC[C])PQELSR|C(ITC[C])PQELSR|C(ITC[C])PQELSR|C(ITC[C])PQELSR|C(ITC[C])PQELSR|C(ITC[C])PQELSR|C(ITC[C])PQELSR|C(ITC[C])PQELSR	3|3|3|1|4|1|4|3	1.29|1.32|0.83|0.79|0.87|0.99|0.82|1.06	0.12166|0.24249|0.01528|NA|0.01155|NA|0.05|0.10392	0.99625	0.21125	22	8
P0C6X5_644	rep	R1AB_CVHNL Replicase polyprotein 1ab OS=Human coronavirus NL63 OX=277944 GN=rep PE=1 SV=1	GC(ITC[C])SVIVR|GC(ITC[C])SVIVR|GC(ITC[C])SVIVR|GC(ITC[C])SVIVR|||GC(ITC[C])SVIVR|GC(ITC[C])SVIVR	1|1|1|2|||1|1	0.91|0.92|0.87|1.005|||1.16|1.11	NA|NA|NA|0.20506|||NA|NA	0.99583	0.11749	7	6
P54136_293	RARS1	SYRC_HUMAN Arginine--tRNA ligase, cytoplasmic OS=Homo sapiens OX=9606 GN=RARS1 PE=1 SV=2	C(ITC[C])VVLLQGK|C(ITC[C])VVLLQGK|||C(ITC[C])VVLLQGK|C(ITC[C])VVLLQGK|C(ITC[C])VVLLQGK|C(ITC[C])VVLLQGK	2|2|||3|2|1|4	1.445|1.045|||0.9|0.93|0.84|0.81	0.2192|0.28991|||0.11136|0.0|NA|0.1021	0.995	0.23516	14	6
O60313_801	OPA1	OPA1_HUMAN Dynamin-like 120 kDa protein, mitochondrial OS=Homo sapiens OX=9606 GN=OPA1 PE=1 SV=3	|C(ITC[C])NEEHPAYLASDEITTVR|C(ITC[C])NEEHPAYLASDEITTVR|C(ITC[C])NEEHPAYLASDEITTVR|C(ITC[C])NEEHPAYLASDEITTVR|||C(ITC[C])NEEHPAYLASDEITTVR	|1|2|4|1|||2	|0.95|0.9|1.04|1.04|||1.045	|NA|0.12728|0.14271|NA|||0.02121	0.995	0.06633	10	5
Q9P2R7_384	SUCLA2	SUCB1_HUMAN Succinate--CoA ligase [ADP-forming] subunit beta, mitochondrial OS=Homo sapiens OX=9606 GN=SUCLA2 PE=1 SV=3	C(ITC[C])DVIAQGIVMAVK|C(ITC[C])DVIAQGIVMAVK|C(ITC[C])DVIAQGIVMAVK|C(ITC[C])DVIAQGIVMAVK|C(ITC[C])DVIAQGIVMAVK|C(ITC[C])DVIAQGIVMAVK|C(ITC[C])DVIAQGIVMAVK|C(ITC[C])DVIAQGIVMAVK	4|2|4|4|2|6|4|3	1.48|1.065|0.895|0.785|0.92|1.07|1.055|0.68	0.04123|0.10607|0.26133|0.30934|0.11314|0.25628|0.25902|0.23245	0.99375	0.24151	29	8
Q7L1Q6_35	BZW1	BZW1_HUMAN Basic leucine zipper and W2 domain-containing protein 1 OS=Homo sapiens OX=9606 GN=BZW1 PE=1 SV=1	C(ITC[C])IIQGLTETGTDLEAVAK|C(ITC[C])IIQGLTETGTDLEAVAK|C(ITC[C])IIQGLTETGTDLEAVAK||C(ITC[C])IIQGLTETGTDLEAVAK|C(ITC[C])IIQGLTETGTDLEAVAK||C(ITC[C])IIQGLTETGTDLEAVAK	2|4|1||2|2||1	1.19|1.325|0.78||0.82|1.115||0.73	0.0|0.45154|NA||0.0|0.14849||NA	0.99333	0.24835	12	6
Q96F45_120	ZNF503	ZN503_HUMAN Zinc finger protein 503 OS=Homo sapiens OX=9606 GN=ZNF503 PE=1 SV=1	C(ITC[C])SQIGKPDPSPSSK|||C(ITC[C])SQIGKPDPSPSSK||C(ITC[C])SQIGKPDPSPSSK||	1|||1||1||	0.75|||1.16||1.07||	NA|||NA||NA||	0.99333	0.21548	3	3
O15371_196	EIF3D	EIF3D_HUMAN Eukaryotic translation initiation factor 3 subunit D OS=Homo sapiens OX=9606 GN=EIF3D PE=1 SV=1	C(ITC[C])GALEYYDK||C(ITC[C])GALEYYDK|C(ITC[C])GALEYYDK|||C(ITC[C])GALEYYDK|C(ITC[C])GALEYYDK	3||1|1|||2|2	0.47||1.28|1.08|||1.09|1.045	0.01155||NA|NA|||0.0|0.02121	0.993	0.30642	9	5
P11310_116	ACADM	ACADM_HUMAN Medium-chain specific acyl-CoA dehydrogenase, mitochondrial OS=Homo sapiens OX=9606 GN=ACADM PE=1 SV=1	|||C(ITC[C])TGVQTAIEGNSLGQMPIIIAGNDQQK|C(ITC[C])TGVQTAIEGNSLGQMPIIIAGNDQQK|C(ITC[C])TGVQTAIEGNSLGQMPIIIAGNDQQK|C(ITC[C])TGVQTAIEGNSLGQMPIIIAGNDQQK|C(ITC[C])TGVQTAIEGNSLGQMPIIIAGNDQQK	|||1|1|1|2|1	|||0.97|1.1|0.89|1.09|0.91	|||NA|NA|NA|0.14142|NA	0.992	0.09859	6	5
Q96SI9_195	STRBP	STRBP_HUMAN Spermatid perinuclear RNA-binding protein OS=Homo sapiens OX=9606 GN=STRBP PE=1 SV=1	|C(ITC[C])LNALASLR|C(ITC[C])LNALASLR|C(ITC[C])LNALASLR||||	|1|1|2||||	|1.02|1.07|0.885||||	|NA|NA|0.02121||||	0.99167	0.0957	4	3
Q12789_1704	GTF3C1	TF3C1_HUMAN General transcription factor 3C polypeptide 1 OS=Homo sapiens OX=9606 GN=GTF3C1 PE=1 SV=4	||||C(ITC[C])LPDTFTK|C(ITC[C])LPDTFTK|C(ITC[C])LPDTFTK|C(ITC[C])LPDTFTK	||||2|1|2|2	||||0.985|1.14|0.9|0.94	||||0.03536|NA|0.01414|0.09899	0.99125	0.10507	7	4
P50991_252	CCT4	TCPD_HUMAN T-complex protein 1 subunit delta OS=Homo sapiens OX=9606 GN=CCT4 PE=1 SV=4	C(ITC[C])LSAPK|C(ITC[C])LSAPK|C(ITC[C])LSAPK|C(ITC[C])LSAPK|C(ITC[C])LSAPK|C(ITC[C])LSAPK|C(ITC[C])LSAPK IGLIQFC(ITC[C])LSAPK|C(ITC[C])LSAPK	3|2|1|1|3|4|4|3	0.58|0.59|1.32|1.34|0.95|0.965|1.045|1.13	0.02517|0.02828|NA|NA|0.00577|0.03862|0.08958|0.09644	0.99	0.28893	21	8
Q7Z2Z2_831	EFL1	EFL1_HUMAN Elongation factor-like GTPase 1 OS=Homo sapiens OX=9606 GN=EFL1 PE=1 SV=2	C(ITC[C])GPNILVNK|C(ITC[C])GPNILVNK|C(ITC[C])GPNILVNK|C(ITC[C])GPNILVNK|||C(ITC[C])GPNILVNK|	1|1|4|2|||2|	1.28|1.15|0.62|0.78|||1.12|	NA|NA|0.1258|0.0|||0.0|	0.99	0.27731	10	5
Q96FW1_23	OTUB1	OTUB1_HUMAN Ubiquitin thioesterase OTUB1 OS=Homo sapiens OX=9606 GN=OTUB1 PE=1 SV=2	C(ITC[C])LAYDEAIMAQQDR|C(ITC[C])LAYDEAIMAQQDR|C(ITC[C])LAYDEAIMAQQDR|C(ITC[C])LAYDEAIMAQQDR||||	1|2|2|1||||	1.1|1.07|0.98|0.81||||	NA|0.11314|0.0|NA||||	0.99	0.13038	6	4
Q9ULV4_420	CORO1C	COR1C_HUMAN Coronin-1C OS=Homo sapiens OX=9606 GN=CORO1C PE=1 SV=1	C(ITC[C])DLISIPK|C(ITC[C])DLISIPK|C(ITC[C])DLISIPK|C(ITC[C])DLISIPK|C(ITC[C])DLISIPK|C(ITC[C])DLISIPK|C(ITC[C])DLISIPK|C(ITC[C])DLISIPK	4|3|4|2|3|3|4|3	1.11|1.1|1.05|1.045|0.84|0.83|1.005|0.94	0.04243|0.07506|0.015|0.07778|0.1097|0.03215|0.0238|0.01732	0.99	0.10951	26	8
P12814_332	ACTN1	ACTN1_HUMAN Alpha-actinin-1 OS=Homo sapiens OX=9606 GN=ACTN1 PE=1 SV=2	|||C(ITC[C])QLEINFNTLQTK|||C(ITC[C])QLEINFNTLQTK|C(ITC[C])QLEINFNTLQTK	|||5|||2|1	|||1.11|||0.91|0.95	|||0.08961|||0.0|NA	0.99	0.10583	8	3
Q8IX12_465	CCAR1	CCAR1_HUMAN Cell division cycle and apoptosis regulator protein 1 OS=Homo sapiens OX=9606 GN=CCAR1 PE=1 SV=2	C(ITC[C])ALAEDPQELR||C(ITC[C])ALAEDPQELR|||C(ITC[C])ALAEDPQELR|C(ITC[C])ALAEDPQELR|C(ITC[C])ALAEDPQELR	2||2|||1|3|1	0.95||1.15|||0.92|1.02|0.91	0.0||0.12728|||NA|0.0|NA	0.99	0.09925	9	5
O60264_1001	SMARCA5	SMCA5_HUMAN SWI/SNF-related matrix-associated actin-dependent regulator of chromatin subfamily A member 5 OS=Homo sapiens OX=9606 GN=SMARCA5 PE=1 SV=1	C(ITC[C])NTLITLIER|C(ITC[C])NTLITLIER||C(ITC[C])NTLITLIER||||C(ITC[C])NTLITLIER	1|1||1||||2	1.03|1.04||0.91||||0.98	NA|NA||NA||||0.0	0.99	0.05944	5	4
Q9NUG4_451	CCM2L	CCM2L_HUMAN Cerebral cavernous malformations 2 protein-like OS=Homo sapiens OX=9606 GN=CCM2L PE=1 SV=3	|C(ITC[C])TGILK|C(ITC[C])TGILK|C(ITC[C])TGILK|C(ITC[C])TGILK|C(ITC[C])TGILK|C(ITC[C])TGILK|C(ITC[C])TGILK	|3|6|6|1|1|3|2	|1.01|1.03|1.06|0.91|0.95|0.92|1.045	|0.05033|0.01169|0.0561|NA|NA|0.08145|0.06364	0.98929	0.06167	22	7
Q16186_357	ADRM1	ADRM1_HUMAN Proteasomal ubiquitin receptor ADRM1 OS=Homo sapiens OX=9606 GN=ADRM1 PE=1 SV=2	C(ITC[C])QFGLPAEAVEAANK|C(ITC[C])QFGLPAEAVEAANK|C(ITC[C])QFGLPAEAVEAANK|C(ITC[C])QFGLPAEAVEAANK||C(ITC[C])QFGLPAEAVEAANK||C(ITC[C])QFGLPAEAVEAANK	1|4|2|1||1||1	1.07|0.8|1.05|1.16||0.87||0.98	NA|0.23036|0.14142|NA||NA||NA	0.98833	0.13378	10	6
Q969Z3_272	MTARC2	MARC2_HUMAN Mitochondrial amidoxime reducing component 2 OS=Homo sapiens OX=9606 GN=MTARC2 PE=1 SV=1	C(ITC[C])ILTTVDPDTGVIDR|||C(ITC[C])ILTTVDPDTGVIDR|||C(ITC[C])ILTTVDPDTGVIDR|C(ITC[C])ILTTVDPDTGVIDR	1|||1|||1|1	1.13|||1.06|||0.85|0.91	NA|||NA|||NA|NA	0.9875	0.12971	4	4
P12268_331	IMPDH2	IMDH2_HUMAN Inosine-5'-monophosphate dehydrogenase 2 OS=Homo sapiens OX=9606 GN=IMPDH2 PE=1 SV=2	C(ITC[C])ITQEVLACGR|VGMGSGSIC(ITC[C])ITQEVLACGR|C(ITC[C])ITQEVLACGR|C(ITC[C])ITQEVLACGR C(ITC[C])ITQEVLACGRPQATAVYK||C(ITC[C])ITQEVLACGR|C(ITC[C])ITQEVLACGR|C(ITC[C])ITQEVLACGR	1|1|3|3||1|3|2	1.27|0.73|0.79|1.07||1.02|1.03|1.0	NA|NA|0.04041|0.2203||NA|0.10693|0.19799	0.98714	0.18025	14	7
Q9UHB9_562	SRP68	SRP68_HUMAN Signal recognition particle subunit SRP68 OS=Homo sapiens OX=9606 GN=SRP68 PE=1 SV=2	C(ITC[C])LDPSLVTK|C(ITC[C])LDPSLVTK|C(ITC[C])LDPSLVTK|C(ITC[C])LDPSLVTK|C(ITC[C])LDPSLVTK|C(ITC[C])LDPSLVTK|C(ITC[C])LDPSLVTK|C(ITC[C])LDPSLVTK	7|3|2|4|3|3|3|3	1.56|1.31|0.69|0.865|0.93|0.87|0.8|0.87	0.1684|0.08737|0.0|0.1097|0.07234|0.06351|0.01|0.04726	0.98687	0.2931	28	8
Q14690_330	PDCD11	RRP5_HUMAN Protein RRP5 homolog OS=Homo sapiens OX=9606 GN=PDCD11 PE=1 SV=3	||AC(ITC[C])ILCVHPR|AC(ITC[C])ILCVHPR|AC(ITC[C])ILCVHPR|AC(ITC[C])ILCVHPR|AC(ITC[C])ILCVHPR|AC(ITC[C])ILCVHPR	||2|2|3|2|2|2	||1.12|1.14|0.79|0.77|1.03|1.065	||0.0|0.04243|0.08083|0.0|0.0|0.12021	0.98583	0.16427	13	6
O00231_289	PSMD11	PSD11_HUMAN 26S proteasome non-ATPase regulatory subunit 11 OS=Homo sapiens OX=9606 GN=PSMD11 PE=1 SV=3	C(ITC[C])VAQASK|C(ITC[C])VAQASK|C(ITC[C])VAQASK|C(ITC[C])VAQASK|C(ITC[C])VAQASK|C(ITC[C])VAQASK||C(ITC[C])VAQASK	2|1|2|2|1|1||1	0.68|0.71|1.19|1.2|1.08|1.09||0.95	0.0|NA|0.0|0.02828|NA|NA||NA	0.98571	0.21532	10	7
P49327_1759	FASN	FAS_HUMAN Fatty acid synthase OS=Homo sapiens OX=9606 GN=FASN PE=1 SV=3	C(ITC[C])LATHGR|C(ITC[C])LATHGR|C(ITC[C])LATHGR|C(ITC[C])LATHGR|C(ITC[C])LATHGR|C(ITC[C])LATHGR||C(ITC[C])LATHGR	4|3|3|5|2|2||2	0.78|0.84|1.13|1.13|1.005|0.84||1.175	0.08544|0.08963|0.09866|0.06496|0.0495|0.25456||0.0495	0.98571	0.16463	21	7
P12694_178	BCKDHA	ODBA_HUMAN 2-oxoisovalerate dehydrogenase subunit alpha, mitochondrial OS=Homo sapiens OX=9606 GN=BCKDHA PE=1 SV=2	||||C(ITC[C])YGNISDLGK|C(ITC[C])YGNISDLGK|C(ITC[C])YGNISDLGK|C(ITC[C])YGNISDLGK	||||1|1|1|1	||||1.32|0.94|0.74|0.94	||||NA|NA|NA|NA	0.985	0.24242	4	4
Q96HN2_353	AHCYL2	SAHH3_HUMAN Adenosylhomocysteinase 3 OS=Homo sapiens OX=9606 GN=AHCYL2 PE=1 SV=1	|||C(ITC[C])VPAMNVNDSVTK||C(ITC[C])VPAMNVNDSVTK|C(ITC[C])VPAMNVNDSVTK|C(ITC[C])VPAMNVNDSVTK	|||1||2|1|1	|||1.09||0.96|1.0|0.89	|||NA||0.0|NA|NA	0.985	0.08347	5	4
Q16836_211	HADH	HCDH_HUMAN Hydroxyacyl-coenzyme A dehydrogenase, mitochondrial OS=Homo sapiens OX=9606 GN=HADH PE=1 SV=3	HPVSC(ITC[C])K||||HPVSC(ITC[C])K|HPVSC(ITC[C])K|HPVSC(ITC[C])K|	1||||1|3|1|	1.1||||0.95|0.91|0.98|	NA||||NA|0.02887|NA|	0.985	0.08185	6	4
Q99471_49	PFDN5	PFD5_HUMAN Prefoldin subunit 5 OS=Homo sapiens OX=9606 GN=PFDN5 PE=1 SV=2	C(ITC[C])LNVLNK|||C(ITC[C])LNVLNK|C(ITC[C])LNVLNK|||C(ITC[C])LNVLNK	1|||1|1|||2	1.0|||1.06|0.89|||0.99	NA|||NA|NA|||0.0	0.985	0.07047	5	4
Q00839_648	HNRNPU	HNRPU_HUMAN Heterogeneous nuclear ribonucleoprotein U OS=Homo sapiens OX=9606 GN=HNRNPU PE=1 SV=6	C(ITC[C])FDEITYVELQK|C(ITC[C])FDEITYVELQK|C(ITC[C])FDEITYVELQK|C(ITC[C])FDEITYVELQK|C(ITC[C])FDEITYVELQK||C(ITC[C])FDEITYVELQK|C(ITC[C])FDEITYVELQK	2|2|5|1|1||2|2	1.045|1.03|0.97|1.0|0.99||0.855|1.005	0.24749|0.02828|0.09592|NA|NA||0.13435|0.13435	0.985	0.06245	15	7
Q96S55_502	WRNIP1	WRIP1_HUMAN ATPase WRNIP1 OS=Homo sapiens OX=9606 GN=WRNIP1 PE=1 SV=2	C(ITC[C])ISALHK|C(ITC[C])ISALHK|C(ITC[C])ISALHK|C(ITC[C])ISALHK|C(ITC[C])ISALHK|C(ITC[C])ISALHK|C(ITC[C])ISALHK|C(ITC[C])ISALHK	1|1|2|3|1|1|2|1	0.57|0.54|1.31|1.15|0.99|0.92|1.075|1.32	NA|NA|0.05657|0.08386|NA|NA|0.06364|NA	0.98438	0.29945	12	8
Q5H9R7_844	PPP6R3	PP6R3_HUMAN Serine/threonine-protein phosphatase 6 regulatory subunit 3 OS=Homo sapiens OX=9606 GN=PPP6R3 PE=1 SV=2	C(ITC[C])AAPRPPSSSPEQR|C(ITC[C])AAPRPPSSSPEQR|C(ITC[C])AAPRPPSSSPEQR|C(ITC[C])AAPRPPSSSPEQR|C(ITC[C])AAPRPPSSSPEQR||C(ITC[C])AAPRPPSSSPEQR|C(ITC[C])AAPRPPSSSPEQR	5|5|2|2|3||2|3	0.67|0.58|1.255|1.19|1.25||1.005|0.94	0.18119|0.11194|0.16263|0.0|0.05196||0.00707|0.02309	0.98429	0.27411	22	7
P49790_1129	NUP153	NU153_HUMAN Nuclear pore complex protein Nup153 OS=Homo sapiens OX=9606 GN=NUP153 PE=1 SV=2	C(ITC[C])QPVFSFGNSEQTK|C(ITC[C])QPVFSFGNSEQTK|C(ITC[C])QPVFSFGNSEQTK|C(ITC[C])QPVFSFGNSEQTK||||	5|4|3|1||||	0.75|0.705|1.36|1.12||||	0.21241|0.1974|0.35341|NA||||	0.98375	0.31223	13	4
Q9UBF2_662	COPG2	COPG2_HUMAN Coatomer subunit gamma-2 OS=Homo sapiens OX=9606 GN=COPG2 PE=1 SV=1	||C(ITC[C])TNTLNDQLLEK||C(ITC[C])TNTLNDQLLEK||C(ITC[C])TNTLNDQLLEK|C(ITC[C])TNTLNDQLLEK	||1||1||1|2	||0.79||1.01||1.26|0.875	||NA||NA||NA|0.09192	0.98375	0.20524	5	4
P50570_27	DNM2	DYN2_HUMAN Dynamin-2 OS=Homo sapiens OX=9606 GN=DNM2 PE=1 SV=2	C(ITC[C])HLDLPQIAVVGGQSAGK|C(ITC[C])HLDLPQIAVVGGQSAGK|C(ITC[C])HLDLPQIAVVGGQSAGK|C(ITC[C])HLDLPQIAVVGGQSAGK|C(ITC[C])HLDLPQIAVVGGQSAGK|C(ITC[C])HLDLPQIAVVGGQSAGK|C(ITC[C])HLDLPQIAVVGGQSAGK|C(ITC[C])HLDLPQIAVVGGQSAGK	4|6|6|8|3|4|7|2	1.11|1.27|0.8|0.87|0.86|1.065|1.0|0.895	0.25329|0.31279|0.17309|0.10888|0.1249|0.06551|0.12423|0.03536	0.98375	0.15795	40	8
Q8IYQ7_299	THNSL1	THNS1_HUMAN Threonine synthase-like 1 OS=Homo sapiens OX=9606 GN=THNSL1 PE=1 SV=2	||C(ITC[C])IHPADIPAAR||C(ITC[C])IHPADIPAAR||C(ITC[C])IHPADIPAAR|C(ITC[C])IHPADIPAAR	||2||1||2|1	||0.93||1.06||0.905|1.04	||0.02828||NA||0.09192|NA	0.98375	0.07761	6	4
Q14008_1500	CKAP5	CKAP5_HUMAN Cytoskeleton-associated protein 5 OS=Homo sapiens OX=9606 GN=CKAP5 PE=1 SV=3	C(ITC[C])EMPELVQHK|C(ITC[C])EMPELVQHK|C(ITC[C])EMPELVQHK|C(ITC[C])EMPELVQHK|||C(ITC[C])EMPELVQHK|C(ITC[C])EMPELVQHK	1|1|1|3|||1|1	1.38|0.91|0.84|1.11|||0.81|0.85	NA|NA|NA|0.24826|||NA|NA	0.98333	0.22232	8	6
Q9UFF9_67	CNOT8	CNOT8_HUMAN CCR4-NOT transcription complex subunit 8 OS=Homo sapiens OX=9606 GN=CNOT8 PE=1 SV=1	|C(ITC[C])NVDLLK|C(ITC[C])NVDLLK|C(ITC[C])NVDLLK|C(ITC[C])NVDLLK||C(ITC[C])NVDLLK|C(ITC[C])NVDLLK	|1|2|3|2||1|1	|0.95|0.92|0.83|1.21||0.99|1.0	|NA|0.15556|0.06028|0.12728||NA|NA	0.98333	0.12675	10	6
Q13330_126	MTA1	MTA1_HUMAN Metastasis-associated protein MTA1 OS=Homo sapiens OX=9606 GN=MTA1 PE=1 SV=2	C(ITC[C])SVTLLNETESLK|C(ITC[C])SVTLLNETESLK|C(ITC[C])SVTLLNETESLK|||||	1|1|2|||||	1.02|1.03|0.9|||||	NA|NA|0.04243|||||	0.98333	0.07234	4	3
Q09161_332	NCBP1	NCBP1_HUMAN Nuclear cap-binding protein subunit 1 OS=Homo sapiens OX=9606 GN=NCBP1 PE=1 SV=1	C(ITC[C])AAQLVSYPGK||C(ITC[C])AAQLVSYPGK|C(ITC[C])AAQLVSYPGK|C(ITC[C])AAQLVSYPGK|C(ITC[C])AAQLVSYPGK|C(ITC[C])AAQLVSYPGK|C(ITC[C])AAQLVSYPGK	2||1|1|2|2|3|2	1.455||0.85|0.82|1.115|0.745|0.82|1.07	0.07778||NA|NA|0.24749|0.00707|0.13013|0.25456	0.98214	0.25008	13	7
Q99832_450	CCT7	TCPH_HUMAN T-complex protein 1 subunit eta OS=Homo sapiens OX=9606 GN=CCT7 PE=1 SV=2	|C(ITC[C])DNAGFDATNILNK|C(ITC[C])DNAGFDATNILNK|C(ITC[C])DNAGFDATNILNK|C(ITC[C])DNAGFDATNILNK|C(ITC[C])DNAGFDATNILNK|C(ITC[C])DNAGFDATNILNK|C(ITC[C])DNAGFDATNILNK	|2|1|2|1|2|1|1	|1.465|0.84|0.78|0.98|1.03|0.91|0.87	|0.03536|NA|0.05657|NA|0.0|NA|NA	0.98214	0.22887	10	7
Q7Z7H8_64	MRPL10	RM10_HUMAN 39S ribosomal protein L10, mitochondrial OS=Homo sapiens OX=9606 GN=MRPL10 PE=1 SV=3	C(ITC[C])LPSPPSPPQEEIGLIR|C(ITC[C])LPSPPSPPQEEIGLIR|C(ITC[C])LPSPPSPPQEEIGLIR|C(ITC[C])LPSPPSPPQEEIGLIR|C(ITC[C])LPSPPSPPQEEIGLIR|C(ITC[C])LPSPPSPPQEEIGLIR|C(ITC[C])LPSPPSPPQEEIGLIR|C(ITC[C])LPSPPSPPQEEIGLIR	2|1|6|5|3|5|5|8	1.165|1.39|0.76|0.85|0.91|1.1|0.78|0.9	0.0495|NA|0.05967|0.04764|0.05196|0.05683|0.09706|0.06232	0.98187	0.21821	35	8
Q969Z0_246	TBRG4	FAKD4_HUMAN FAST kinase domain-containing protein 4 OS=Homo sapiens OX=9606 GN=TBRG4 PE=1 SV=1	|||C(ITC[C])LELVEHFGPNELR|||C(ITC[C])LELVEHFGPNELR|C(ITC[C])LELVEHFGPNELR	|||1|||2|1	|||0.88|||1.185|0.88	|||NA|||0.24749|NA	0.98167	0.17609	4	3
Q14696_180	MESD	MESD_HUMAN LRP chaperone MESD OS=Homo sapiens OX=9606 GN=MESD PE=1 SV=2	|C(ITC[C])ADVTLEGQVYPGK|C(ITC[C])ADVTLEGQVYPGK|C(ITC[C])ADVTLEGQVYPGK||||	|4|6|3||||	|1.04|0.995|0.91||||	|0.01258|0.11673|0.04041||||	0.98167	0.06602	13	3
P62316_63	SNRPD2	SMD2_HUMAN Small nuclear ribonucleoprotein Sm D2 OS=Homo sapiens OX=9606 GN=SNRPD2 PE=1 SV=1	||C(ITC[C])NMVLENVK|C(ITC[C])NMVLENVK|C(ITC[C])NMVLENVK|||C(ITC[C])NMVLENVK	||1|1|1|||2	||1.0|1.03|1.02|||0.875	||NA|NA|NA|||0.0495	0.98125	0.07192	5	4
O15228_619	GNPAT	GNPAT_HUMAN Dihydroxyacetone phosphate acyltransferase OS=Homo sapiens OX=9606 GN=GNPAT PE=1 SV=1	|||C(ITC[C])YDVLSSDVQK||C(ITC[C])YDVLSSDVQK|C(ITC[C])YDVLSSDVQK|C(ITC[C])YDVLSSDVQK	|||1||3|1|1	|||0.84||0.98|0.9|1.2	|||NA||0.0|NA|NA	0.98	0.15748	6	4
P09622_484	DLD	DLDH_HUMAN Dihydrolipoyl dehydrogenase, mitochondrial OS=Homo sapiens OX=9606 GN=DLD PE=1 SV=2	||C(ITC[C])HAHPTLSEAFR|C(ITC[C])HAHPTLSEAFR||||C(ITC[C])HAHPTLSEAFR	||1|1||||1	||1.08|0.82||||1.04	||NA|NA||||NA	0.98	0.14	3	3
Q9Y6Y8_604	SEC23IP	S23IP_HUMAN SEC23-interacting protein OS=Homo sapiens OX=9606 GN=SEC23IP PE=1 SV=1	C(ITC[C])PGPLAVANGVVK|C(ITC[C])PGPLAVANGVVK|C(ITC[C])PGPLAVANGVVK|C(ITC[C])PGPLAVANGVVK|||C(ITC[C])PGPLAVANGVVK|	3|1|2|1|||2|	1.19|1.04|0.81|0.91|||0.945|	0.20664|NA|0.05657|NA|||0.02121|	0.979	0.14381	9	5
Q96J02_57	ITCH	ITCH_HUMAN E3 ubiquitin-protein ligase Itchy homolog OS=Homo sapiens OX=9606 GN=ITCH PE=1 SV=2	C(ITC[C])NNTNSPK|C(ITC[C])NNTNSPK|||C(ITC[C])NNTNSPK|C(ITC[C])NNTNSPK|C(ITC[C])NNTNSPK|C(ITC[C])NNTNSPK	1|1|||1|1|1|2	0.99|1.08|||0.9|0.75|1.14|1.01	NA|NA|||NA|NA|NA|0.0	0.97833	0.13848	7	6
Q9BT78_378	COPS4	CSN4_HUMAN COP9 signalosome complex subunit 4 OS=Homo sapiens OX=9606 GN=COPS4 PE=1 SV=1	|||C(ITC[C])FQVNNLLEK|C(ITC[C])FQVNNLLEK|C(ITC[C])FQVNNLLEK||	|||2|3|1||	|||0.905|1.0|1.03||	|||0.24749|0.0|NA||	0.97833	0.06526	6	3
P52272_653	HNRNPM	HNRPM_HUMAN Heterogeneous nuclear ribonucleoprotein M OS=Homo sapiens OX=9606 GN=HNRNPM PE=1 SV=3	C(ITC[C])QIFVR AC(ITC[C])QIFVR|C(ITC[C])QIFVR AC(ITC[C])QIFVR|C(ITC[C])QIFVR|C(ITC[C])QIFVR AC(ITC[C])QIFVR|C(ITC[C])QIFVR AC(ITC[C])QIFVR|C(ITC[C])QIFVR AC(ITC[C])QIFVR|C(ITC[C])QIFVR AC(ITC[C])QIFVR|C(ITC[C])QIFVR AC(ITC[C])QIFVR	5|9|2|5|6|7|8|6	1.46|1.41|0.74|0.7|0.96|1.0|0.785|0.77	0.30725|0.29285|0.07071|0.06535|0.0814|0.13175|0.06105|0.05177	0.97813	0.301	48	8
P26640_682	VARS1	SYVC_HUMAN Valine--tRNA ligase OS=Homo sapiens OX=9606 GN=VARS1 PE=1 SV=4	C(ITC[C])GEMAQAASAAVTR|C(ITC[C])GEMAQAASAAVTR|C(ITC[C])GEMAQAASAAVTR|C(ITC[C])GEMAQAASAAVTR|C(ITC[C])GEMAQAASAAVTR|C(ITC[C])GEMAQAASAAVTR|C(ITC[C])GEMAQAASAAVTR|C(ITC[C])GEMAQAASAAVTR	3|3|4|12|1|1|7|4	0.57|0.8|0.905|0.85|1.3|1.33|1.08|0.985	0.26652|0.14933|0.09743|0.10911|NA|NA|0.11349|0.02887	0.9775	0.25576	35	8
O60664_341	PLIN3	PLIN3_HUMAN Perilipin-3 OS=Homo sapiens OX=9606 GN=PLIN3 PE=1 SV=3	|C(ITC[C])TSLGSSIQGLPTNVK|C(ITC[C])TSLGSSIQGLPTNVK|C(ITC[C])TSLGSSIQGLPTNVK||C(ITC[C])TSLGSSIQGLPTNVK||	|1|1|1||1||	|0.94|1.27|0.96||0.74||	|NA|NA|NA||NA||	0.9775	0.21884	4	4
Q00610_870	CLTC	CLH1_HUMAN Clathrin heavy chain 1 OS=Homo sapiens OX=9606 GN=CLTC PE=1 SV=5	C(ITC[C])EEPATHNALAK|C(ITC[C])EEPATHNALAK|||||C(ITC[C])EEPATHNALAK|C(ITC[C])EEPATHNALAK	1|2|||||2|2	0.75|0.87|||||1.1|1.19	NA|0.0|||||0.0|0.0	0.9775	0.20288	7	4
Q7Z6K5_183	ARPIN	ARPIN_HUMAN Arpin OS=Homo sapiens OX=9606 GN=ARPIN PE=1 SV=1	||C(ITC[C])NFTGDGK|C(ITC[C])NFTGDGK|C(ITC[C])NFTGDGK|C(ITC[C])NFTGDGK|C(ITC[C])NFTGDGK|C(ITC[C])NFTGDGK	||3|1|2|1|3|1	||1.05|1.03|0.965|0.69|0.88|1.25	||0.02309|NA|0.3182|NA|0.08622|NA	0.9775	0.18686	11	6
P13639_136	EEF2	EF2_HUMAN Elongation factor 2 OS=Homo sapiens OX=9606 GN=EEF2 PE=1 SV=4	C(ITC[C])VQTETVLR|||C(ITC[C])VQTETVLR|C(ITC[C])VQTETVLR||C(ITC[C])VQTETVLR|	1|||1|1||2|	0.96|||0.92|0.98||1.05|	NA|||NA|NA||0.14142|	0.9775	0.05439	5	4
O95757_290	HSPA4L	HS74L_HUMAN Heat shock 70 kDa protein 4L OS=Homo sapiens OX=9606 GN=HSPA4L PE=1 SV=3	||||C(ITC[C])FMNDLDVSSK|C(ITC[C])FMNDLDVSSK|C(ITC[C])FMNDLDVSSK|	||||1|1|1|	||||0.78|0.92|1.23|	||||NA|NA|NA|	0.97667	0.23029	3	3
Q9ULT8_1944	HECTD1	HECD1_HUMAN E3 ubiquitin-protein ligase HECTD1 OS=Homo sapiens OX=9606 GN=HECTD1 PE=1 SV=3	||||C(ITC[C])SQLIAAYK||C(ITC[C])SQLIAAYK|C(ITC[C])SQLIAAYK	||||2||1|1	||||1.13||0.89|0.91	||||0.0||NA|NA	0.97667	0.13317	4	3
P15170_261	GSPT1	ERF3A_HUMAN Eukaryotic peptide chain release factor GTP-binding subunit ERF3A OS=Homo sapiens OX=9606 GN=GSPT1 PE=1 SV=1	|C(ITC[C])SGLTGANIK|C(ITC[C])SGLTGANIK|C(ITC[C])SGLTGANIK|C(ITC[C])SGLTGANIK|C(ITC[C])SGLTGANIK|C(ITC[C])SGLTGANIK|C(ITC[C])SGLTGANIK	|2|1|2|2|1|1|1	|1.205|0.8|1.315|0.765|0.72|0.88|1.15	|0.02121|NA|0.02121|0.03536|NA|NA|NA	0.97643	0.24079	10	7
Q9NVE7_451	PANK4	PANK4_HUMAN 4'-phosphopantetheine phosphatase OS=Homo sapiens OX=9606 GN=PANK4 PE=1 SV=1	||C(ITC[C])FEEALDGVVK|||C(ITC[C])FEEALDGVVK|C(ITC[C])FEEALDGVVK|C(ITC[C])FEEALDGVVK	||1|||1|2|2	||0.93|||1.06|0.955|0.96	||NA|||NA|0.00707|0.0	0.97625	0.05735	6	4
P49756_83	RBM25	RBM25_HUMAN RNA-binding protein 25 OS=Homo sapiens OX=9606 GN=RBM25 PE=1 SV=3	|C(ITC[C])GPTTTVFVGNISEK|C(ITC[C])GPTTTVFVGNISEK|||C(ITC[C])GPTTTVFVGNISEK|C(ITC[C])GPTTTVFVGNISEK|C(ITC[C])GPTTTVFVGNISEK	|1|1|||1|1|1	|0.6|1.12|||0.84|1.33|0.99	|NA|NA|||NA|NA|NA	0.976	0.27664	5	5
P48506_553	GCLC	GSH1_HUMAN Glutamate--cysteine ligase catalytic subunit OS=Homo sapiens OX=9606 GN=GCLC PE=1 SV=2	C(ITC[C])SILNYLK|C(ITC[C])SILNYLK|C(ITC[C])SILNYLK|C(ITC[C])SILNYLK||||C(ITC[C])SILNYLK	3|3|6|5||||1	0.75|0.98|1.22|1.09||||0.84	0.16442|0.07|0.06387|0.00548||||NA	0.976	0.18849	18	5
P33993_482	MCM7	MCM7_HUMAN DNA replication licensing factor MCM7 OS=Homo sapiens OX=9606 GN=MCM7 PE=1 SV=4	C(ITC[C])SILAAANPAYGR|C(ITC[C])SILAAANPAYGR|C(ITC[C])SILAAANPAYGR|C(ITC[C])SILAAANPAYGR|C(ITC[C])SILAAANPAYGR|C(ITC[C])SILAAANPAYGR|C(ITC[C])SILAAANPAYGR|C(ITC[C])SILAAANPAYGR	6|5|4|5|6|1|4|6	0.975|0.94|0.845|0.93|0.99|1.09|1.005|1.03	0.09326|0.08295|0.05909|0.07232|0.18738|NA|0.11529|0.2811	0.97562	0.07321	37	8
P12277_141	CKB	KCRB_HUMAN Creatine kinase B-type OS=Homo sapiens OX=9606 GN=CKB PE=1 SV=1	||||C(ITC[C])LPPHCSR|C(ITC[C])LPPHCSR|C(ITC[C])LPPHCSR|C(ITC[C])LPPHCSR	||||3|3|8|8	||||0.89|1.17|0.845|0.995	||||1.66206|0.25239|0.18369|0.16987	0.975	0.1444	22	4
O43896_350	KIF1C	KIF1C_HUMAN Kinesin-like protein KIF1C OS=Homo sapiens OX=9606 GN=KIF1C PE=1 SV=3	|C(ITC[C])NAIINEDPNAR|C(ITC[C])NAIINEDPNAR|C(ITC[C])NAIINEDPNAR||C(ITC[C])NAIINEDPNAR|C(ITC[C])NAIINEDPNAR|C(ITC[C])NAIINEDPNAR	|2|1|2||1|3|1	|1.21|1.02|0.83||1.01|0.95|0.83	|0.11314|NA|0.0||NA|0.31005|NA	0.975	0.14223	10	6
Q14643_1406	ITPR1	ITPR1_HUMAN Inositol 1,4,5-trisphosphate receptor type 1 OS=Homo sapiens OX=9606 GN=ITPR1 PE=1 SV=3	|C(ITC[C])NSLLPLDDIVR|C(ITC[C])NSLLPLDDIVR|C(ITC[C])NSLLPLDDIVR||||C(ITC[C])NSLLPLDDIVR	|1|1|1||||1	|0.95|0.99|1.03||||0.93	|NA|NA|NA||||NA	0.975	0.04435	4	4
Q9BQ39_417	DDX50	DDX50_HUMAN ATP-dependent RNA helicase DDX50 OS=Homo sapiens OX=9606 GN=DDX50 PE=1 SV=1	C(ITC[C])LHGDIAQSQR|C(ITC[C])LHGDIAQSQR|C(ITC[C])LHGDIAQSQR|C(ITC[C])LHGDIAQSQR||C(ITC[C])LHGDIAQSQR|C(ITC[C])LHGDIAQSQR|C(ITC[C])LHGDIAQSQR	1|2|5|2||4|6|2	1.31|1.325|0.81|0.72||0.88|0.84|0.935	NA|0.10607|0.02387|0.0||0.13856|0.13971|0.06364	0.97429	0.24352	22	7
P49916_499	LIG3	DNLI3_HUMAN DNA ligase 3 OS=Homo sapiens OX=9606 GN=LIG3 PE=1 SV=2	C(ITC[C])PNGMFSEIK|C(ITC[C])PNGMFSEIK|C(ITC[C])PNGMFSEIK|C(ITC[C])PNGMFSEIK||||	1|1|2|1||||	0.93|1.25|1.035|0.68||||	NA|NA|0.20506|NA||||	0.97375	0.23683	5	4
Q8IWR0_149	ZC3H7A	Z3H7A_HUMAN Zinc finger CCCH domain-containing protein 7A OS=Homo sapiens OX=9606 GN=ZC3H7A PE=1 SV=1	|C(ITC[C])SLAVPQDEHVIK|C(ITC[C])SLAVPQDEHVIK|C(ITC[C])SLAVPQDEHVIK|C(ITC[C])SLAVPQDEHVIK|C(ITC[C])SLAVPQDEHVIK||C(ITC[C])SLAVPQDEHVIK	|1|1|2|2|1||1	|1.12|0.92|1.51|0.94|0.66||0.69	|NA|NA|0.0|0.0|NA||NA	0.97333	0.31367	8	6
Q29RF7_14	PDS5A	PDS5A_HUMAN Sister chromatid cohesion protein PDS5 homolog A OS=Homo sapiens OX=9606 GN=PDS5A PE=1 SV=1	||||C(ITC[C])GVVSADGK|C(ITC[C])GVVSADGK|C(ITC[C])GVVSADGK|	||||1|1|1|	||||0.99|0.95|0.98|	||||NA|NA|NA|	0.97333	0.02082	3	3
Q8WYP5_521	AHCTF1	ELYS_HUMAN Protein ELYS OS=Homo sapiens OX=9606 GN=AHCTF1 PE=1 SV=3	C(ITC[C])LVAGLLSPR|C(ITC[C])LVAGLLSPR|C(ITC[C])LVAGLLSPR|C(ITC[C])LVAGLLSPR|C(ITC[C])LVAGLLSPR|C(ITC[C])LVAGLLSPR|C(ITC[C])LVAGLLSPR|C(ITC[C])LVAGLLSPR	4|3|6|5|4|5|7|5	1.385|1.28|0.64|0.69|0.98|1.05|0.95|0.81	0.14844|0.19|0.07111|0.05762|0.06|0.0455|0.05028|0.03347	0.97313	0.26405	39	8
Q6P158_1349	DHX57	DHX57_HUMAN Putative ATP-dependent RNA helicase DHX57 OS=Homo sapiens OX=9606 GN=DHX57 PE=1 SV=2	|C(ITC[C])ELDQLLQDK||C(ITC[C])ELDQLLQDK||C(ITC[C])ELDQLLQDK|C(ITC[C])ELDQLLQDK|C(ITC[C])ELDQLLQDK	|2||1||1|1|2	|1.02||0.92||1.0|0.88|1.045	|0.0||NA||NA|NA|0.13435	0.973	0.06996	7	5
P07686_360	HEXB	HEXB_HUMAN Beta-hexosaminidase subunit beta OS=Homo sapiens OX=9606 GN=HEXB PE=1 SV=3	C(ITC[C])WESNPK||C(ITC[C])WESNPK|C(ITC[C])WESNPK|C(ITC[C])WESNPK||C(ITC[C])WESNPK|C(ITC[C])WESNPK	1||4|3|1||1|1	1.18||0.865|0.89|0.94||0.96|1.0	NA||0.10243|0.07572|NA||NA|NA	0.9725	0.11259	11	6
P83731_36	RPL24	RL24_HUMAN 60S ribosomal protein L24 OS=Homo sapiens OX=9606 GN=RPL24 PE=1 SV=1	C(ITC[C])ESAFLSK|C(ITC[C])ESAFLSK|C(ITC[C])ESAFLSK|C(ITC[C])ESAFLSK|C(ITC[C])ESAFLSK|C(ITC[C])ESAFLSK|C(ITC[C])ESAFLSK|C(ITC[C])ESAFLSK	14|12|5|2|4|3|3|4	1.28|1.24|0.69|0.68|1.035|1.03|0.89|0.93	0.17437|0.09278|0.0695|0.0|0.20516|0.02082|0.08718|0.09878	0.97187	0.22274	47	8
Q0VDF9_89	HSPA14	HSP7E_HUMAN Heat shock 70 kDa protein 14 OS=Homo sapiens OX=9606 GN=HSPA14 PE=1 SV=1	C(ITC[C])LVIEK|C(ITC[C])LVIEK|C(ITC[C])LVIEK|C(ITC[C])LVIEK|C(ITC[C])LVIEK||C(ITC[C])LVIEK|	7|3|3|4|2||1|	0.92|0.96|1.06|0.94|0.94||1.01|	0.08327|0.01|0.02887|0.015|0.02828||NA|	0.97167	0.05307	20	6
Q14738_346	PPP2R5D	2A5D_HUMAN Serine/threonine-protein phosphatase 2A 56 kDa regulatory subunit delta isoform OS=Homo sapiens OX=9606 GN=PPP2R5D PE=1 SV=1	|C(ITC[C])VVQFLEK|C(ITC[C])VVQFLEK|C(ITC[C])VVQFLEK|C(ITC[C])VVQFLEK|C(ITC[C])VVQFLEK|C(ITC[C])VVQFLEK|C(ITC[C])VVQFLEK	|1|1|2|2|1|1|1	|1.47|0.65|0.8|0.94|1.1|1.02|0.81	|NA|NA|0.01414|0.0|NA|NA|NA	0.97	0.26683	9	7
Q13464_231	ROCK1	ROCK1_HUMAN Rho-associated protein kinase 1 OS=Homo sapiens OX=9606 GN=ROCK1 PE=1 SV=1	C(ITC[C])DTAVGTPDYISPEVLK||||C(ITC[C])DTAVGTPDYISPEVLK||C(ITC[C])DTAVGTPDYISPEVLK|C(ITC[C])DTAVGTPDYISPEVLK	3||||1||2|1	0.63||||1.15||1.02|1.08	0.06928||||NA||0.38184|NA	0.97	0.23281	7	4
P47897_657	QARS1	SYQ_HUMAN Glutamine--tRNA ligase OS=Homo sapiens OX=9606 GN=QARS1 PE=1 SV=1	||||C(ITC[C])VESLEVTCR||C(ITC[C])VESLEVTCR|C(ITC[C])VESLEVTCR	||||1||1|1	||||1.12||0.85|0.94	||||NA||NA|NA	0.97	0.13748	3	3
P49736_624	MCM2	MCM2_HUMAN DNA replication licensing factor MCM2 OS=Homo sapiens OX=9606 GN=MCM2 PE=1 SV=4	C(ITC[C])TVIAAANPIGGR|C(ITC[C])TVIAAANPIGGR|C(ITC[C])TVIAAANPIGGR|C(ITC[C])TVIAAANPIGGR|C(ITC[C])TVIAAANPIGGR|C(ITC[C])TVIAAANPIGGR|C(ITC[C])TVIAAANPIGGR|C(ITC[C])TVIAAANPIGGR	5|3|4|3|2|4|4|5	0.97|0.82|0.87|0.94|1.035|1.005|1.01|1.11	2.82633|0.01155|0.03686|0.01155|0.02121|0.08846|0.065|0.21112	0.97	0.09262	30	8
P54136_34	RARS1	SYRC_HUMAN Arginine--tRNA ligase, cytoplasmic OS=Homo sapiens OX=9606 GN=RARS1 PE=1 SV=2	C(ITC[C])LGASPNLEQLQEENLK NCGC(ITC[C])LGASPNLEQLQEENLK|C(ITC[C])LGASPNLEQLQEENLK NCGC(ITC[C])LGASPNLEQLQEENLK|C(ITC[C])LGASPNLEQLQEENLK|C(ITC[C])LGASPNLEQLQEENLK|C(ITC[C])LGASPNLEQLQEENLK|C(ITC[C])LGASPNLEQLQEENLK NCGC(ITC[C])LGASPNLEQLQEENLK|C(ITC[C])LGASPNLEQLQEENLK NCGC(ITC[C])LGASPNLEQLQEENLK|C(ITC[C])LGASPNLEQLQEENLK NCGC(ITC[C])LGASPNLEQLQEENLK	7|6|3|5|3|3|8|7	0.85|0.9|0.95|1.0|1.01|0.98|1.01|1.06	0.1014|0.15766|0.01155|0.0753|0.06429|0.01155|0.37895|0.21874	0.97	0.06761	42	8
Q86VP6_356	CAND1	CAND1_HUMAN Cullin-associated NEDD8-dissociated protein 1 OS=Homo sapiens OX=9606 GN=CAND1 PE=1 SV=2	C(ITC[C])LDAVVSTR|C(ITC[C])LDAVVSTR|C(ITC[C])LDAVVSTR|C(ITC[C])LDAVVSTR|C(ITC[C])LDAVVSTR|C(ITC[C])LDAVVSTR|C(ITC[C])LDAVVSTR|C(ITC[C])LDAVVSTR	5|6|3|4|2|3|2|2	1.07|0.99|1.0|0.915|0.95|0.94|0.94|0.94	0.01304|0.00516|0.05568|0.035|0.02828|0.01155|0.07071|0.08485	0.96812	0.04985	27	8
O60684_467	KPNA6	IMA7_HUMAN Importin subunit alpha-7 OS=Homo sapiens OX=9606 GN=KPNA6 PE=1 SV=1	C(ITC[C])GLIEEAYGLDK|C(ITC[C])GLIEEAYGLDK|C(ITC[C])GLIEEAYGLDK|C(ITC[C])GLIEEAYGLDK|C(ITC[C])GLIEEAYGLDK||C(ITC[C])GLIEEAYGLDK|C(ITC[C])GLIEEAYGLDK	2|1|1|3|2||3|2	1.16|1.5|0.74|1.0|0.84||0.72|0.815	0.2687|NA|NA|0.23007|0.0||0.03464|0.02121	0.96786	0.28113	14	7
O94906_837	PRPF6	PRP6_HUMAN Pre-mRNA-processing factor 6 OS=Homo sapiens OX=9606 GN=PRPF6 PE=1 SV=1	C(ITC[C])EHDPHVLLAVAK|C(ITC[C])EHDPHVLLAVAK|C(ITC[C])EHDPHVLLAVAK|C(ITC[C])EHDPHVLLAVAK|C(ITC[C])EHDPHVLLAVAK|||C(ITC[C])EHDPHVLLAVAK	2|3|1|2|2|||1	1.09|1.31|0.72|0.69|0.925|||1.07	0.0|0.33486|NA|0.04243|0.13435|||NA	0.9675	0.23786	11	6
Q7L2E3_346	DHX30	DHX30_HUMAN ATP-dependent RNA helicase DHX30 OS=Homo sapiens OX=9606 GN=DHX30 PE=1 SV=1	C(ITC[C])TIQVPEPILR|C(ITC[C])TIQVPEPILR|C(ITC[C])TIQVPEPILR|C(ITC[C])TIQVPEPILR|C(ITC[C])TIQVPEPILR|C(ITC[C])TIQVPEPILR|C(ITC[C])TIQVPEPILR|C(ITC[C])TIQVPEPILR	3|2|3|7|4|3|5|2	0.72|0.665|1.02|1.05|1.005|0.99|0.99|1.3	0.03606|0.02121|0.04726|1.80011|6.43334|3.88871|8.46928|0.43841	0.9675	0.19831	29	8
Q1KMD3_538	HNRNPUL2	HNRL2_HUMAN Heterogeneous nuclear ribonucleoprotein U-like protein 2 OS=Homo sapiens OX=9606 GN=HNRNPUL2 PE=1 SV=1	C(ITC[C])NVYNSGQR||C(ITC[C])NVYNSGQR|C(ITC[C])NVYNSGQR|C(ITC[C])NVYNSGQR||C(ITC[C])NVYNSGQR|C(ITC[C])NVYNSGQR	1||2|1|3||3|2	1.34||0.925|0.82|0.9||0.88|0.94	NA||0.09192|NA|0.1833||0.17898|0.0	0.9675	0.18724	12	6
P26641_339	EEF1G	EF1G_HUMAN Elongation factor 1-gamma OS=Homo sapiens OX=9606 GN=EEF1G PE=1 SV=3	C(ITC[C])NLITGMFQR|C(ITC[C])NLITGMFQR|C(ITC[C])NLITGMFQR|C(ITC[C])NLITGMFQR|C(ITC[C])NLITGMFQR|C(ITC[C])NLITGMFQR|C(ITC[C])NLITGMFQR|C(ITC[C])NLITGMFQR	3|2|2|5|3|5|5|1	0.7|0.665|1.095|1.11|1.04|1.16|0.97|1.0	0.23643|0.09192|0.09192|0.10616|0.16042|0.32977|0.11576|NA	0.9675	0.18632	26	8
P41252_1001	IARS1	SYIC_HUMAN Isoleucine--tRNA ligase, cytoplasmic OS=Homo sapiens OX=9606 GN=IARS1 PE=1 SV=2	C(ITC[C])NLVPTDEITVYYK|C(ITC[C])NLVPTDEITVYYK|C(ITC[C])NLVPTDEITVYYK|C(ITC[C])NLVPTDEITVYYK|||C(ITC[C])NLVPTDEITVYYK|C(ITC[C])NLVPTDEITVYYK	2|3|1|2|||2|1	1.095|1.01|0.8|0.825|||1.195|0.88	0.02121|0.32808|NA|0.06364|||0.20506|NA	0.9675	0.15864	11	6
Q8NCM8_1307	DYNC2H1	DYHC2_HUMAN Cytoplasmic dynein 2 heavy chain 1 OS=Homo sapiens OX=9606 GN=DYNC2H1 PE=1 SV=4	C(ITC[C])LLQSLK||C(ITC[C])LLQSLK|C(ITC[C])LLQSLK|C(ITC[C])LLQSLK|C(ITC[C])LLQSLK|C(ITC[C])LLQSLK|C(ITC[C])LLQSLK	1||3|2|2|1|3|1	1.22||0.68|0.78|1.01|1.12|0.9|1.06	NA||0.01528|0.07071|0.0|NA|0.02887|NA	0.96714	0.19137	13	7
Q9GZT3_48	SLIRP	SLIRP_HUMAN SRA stem-loop-interacting RNA-binding protein, mitochondrial OS=Homo sapiens OX=9606 GN=SLIRP PE=1 SV=1	C(ITC[C])ILPFDK|C(ITC[C])ILPFDK|C(ITC[C])ILPFDK|C(ITC[C])ILPFDK|C(ITC[C])ILPFDK|C(ITC[C])ILPFDK|C(ITC[C])ILPFDK|C(ITC[C])ILPFDK	7|8|9|7|6|5|5|4	1.18|1.13|0.86|0.89|1.01|1.0|0.82|0.845	0.07804|0.15688|0.06461|0.34799|0.1742|0.01304|0.05523|0.05909	0.96687	0.13562	51	8
P49454_2052	CENPF	CENPF_HUMAN Centromere protein F OS=Homo sapiens OX=9606 GN=CENPF PE=1 SV=3	C(ITC[C])ELENQIAQLNK|C(ITC[C])ELENQIAQLNK||C(ITC[C])ELENQIAQLNK||||	1|1||3||||	0.66|1.25||0.99||||	NA|NA||0.16743||||	0.96667	0.29569	5	3
O94826_442	TOMM70	TOM70_HUMAN Mitochondrial import receptor subunit TOM70 OS=Homo sapiens OX=9606 GN=TOMM70 PE=1 SV=1	C(ITC[C])FALYR|C(ITC[C])FALYR||C(ITC[C])FALYR||||	1|1||2||||	1.05|0.94||0.91||||	NA|NA||0.05657||||	0.96667	0.07371	4	3
Q8NC60_505	NOA1	NOA1_HUMAN Nitric oxide-associated protein 1 OS=Homo sapiens OX=9606 GN=NOA1 PE=1 SV=2	|||C(ITC[C])ILNLLTEK||C(ITC[C])ILNLLTEK|C(ITC[C])ILNLLTEK|	|||2||1|1|	|||0.98||0.92|1.0|	|||0.0||NA|NA|	0.96667	0.04163	4	3
O15160_256	POLR1C	RPAC1_HUMAN DNA-directed RNA polymerases I and III subunit RPAC1 OS=Homo sapiens OX=9606 GN=POLR1C PE=1 SV=1	C(ITC[C])FSPGVIEVQEVQGK|C(ITC[C])FSPGVIEVQEVQGK|C(ITC[C])FSPGVIEVQEVQGK|C(ITC[C])FSPGVIEVQEVQGK|C(ITC[C])FSPGVIEVQEVQGK||C(ITC[C])FSPGVIEVQEVQGK|C(ITC[C])FSPGVIEVQEVQGK	2|1|3|4|1||1|2	1.48|1.39|0.69|0.62|0.95||0.79|0.84	0.29698|NA|0.25403|0.12152|NA||NA|0.0	0.96571	0.33837	14	7
P03243_310		E1B55_ADE05 E1B 55 kDa protein OS=Human adenovirus C serotype 5 OX=28285 PE=1 SV=1	C(ITC[C])TLGILSEGNSR|C(ITC[C])TLGILSEGNSR|C(ITC[C])TLGILSEGNSR|C(ITC[C])TLGILSEGNSR|C(ITC[C])TLGILSEGNSR||C(ITC[C])TLGILSEGNSR|C(ITC[C])TLGILSEGNSR	5|3|5|4|2||6|2	1.29|1.21|0.86|0.855|1.04||0.735|0.765	0.0313|0.03|0.12012|0.04967|0.0||0.03371|0.00707	0.965	0.21882	27	7
Q9C0C9_353	UBE2O	UBE2O_HUMAN (E3-independent) E2 ubiquitin-conjugating enzyme OS=Homo sapiens OX=9606 GN=UBE2O PE=1 SV=3	C(ITC[C])LYVFPAK|C(ITC[C])LYVFPAK|C(ITC[C])LYVFPAK|C(ITC[C])LYVFPAK|||C(ITC[C])LYVFPAK|C(ITC[C])LYVFPAK	1|2|1|1|||1|2	1.06|1.02|1.0|0.88|||0.98|0.845	NA|0.0|NA|NA|||NA|0.33234	0.96417	0.08381	8	6
Q92878_1302	RAD50	RAD50_HUMAN DNA repair protein RAD50 OS=Homo sapiens OX=9606 GN=RAD50 PE=1 SV=1	C(ITC[C])SVSSLGFNVH|C(ITC[C])SVSSLGFNVH||||C(ITC[C])SVSSLGFNVH|C(ITC[C])SVSSLGFNVH|C(ITC[C])SVSSLGFNVH	1|1||||1|2|1	1.02|1.32||||0.87|0.86|0.75	NA|NA||||NA|0.0|NA	0.964	0.22098	6	5
Q5T160_74	RARS2	SYRM_HUMAN Probable arginine--tRNA ligase, mitochondrial OS=Homo sapiens OX=9606 GN=RARS2 PE=1 SV=1	|C(ITC[C])DTVVSEISTGQR|C(ITC[C])DTVVSEISTGQR|C(ITC[C])DTVVSEISTGQR|C(ITC[C])DTVVSEISTGQR||C(ITC[C])DTVVSEISTGQR|	|1|1|1|1||2|	|0.74|1.1|0.9|1.12||0.96|	|NA|NA|NA|NA||0.09899|	0.964	0.15582	6	5
Q12824_167	SMARCB1	SNF5_HUMAN SWI/SNF-related matrix-associated actin-dependent regulator of chromatin subfamily B member 1 OS=Homo sapiens OX=9606 GN=SMARCB1 PE=1 SV=2	||||C(ITC[C])FDDHDPAVIHENASQPEVLVPIR||C(ITC[C])FDDHDPAVIHENASQPEVLVPIR|C(ITC[C])FDDHDPAVIHENASQPEVLVPIR	||||3||4|3	||||1.25||0.76|0.88	||||0.13279||0.16166|0.15524	0.96333	0.25541	10	3
P21796_127	VDAC1	VDAC1_HUMAN Voltage-dependent anion-selective channel protein 1 OS=Homo sapiens OX=9606 GN=VDAC1 PE=1 SV=2	||C(ITC[C])DMDFDIAGPSIR|||C(ITC[C])DMDFDIAGPSIR|C(ITC[C])DMDFDIAGPSIR|	||1|||1|2|	||0.84|||0.98|1.07|	||NA|||NA|0.0|	0.96333	0.1159	4	3
Q99613_443	EIF3C	EIF3C_HUMAN Eukaryotic translation initiation factor 3 subunit C OS=Homo sapiens OX=9606 GN=EIF3C PE=1 SV=1	||C(ITC[C])ILTLVER GC(ITC[C])ILTLVER|GC(ITC[C])ILTLVER||GC(ITC[C])ILTLVER|C(ITC[C])ILTLVER GC(ITC[C])ILTLVER|C(ITC[C])ILTLVER	||3|2||2|2|1	||1.32|0.8||1.06|0.815|0.82	||0.35218|0.0||0.08485|0.02121|NA	0.963	0.22681	10	5
P13797_209	PLS3	PLST_HUMAN Plastin-3 OS=Homo sapiens OX=9606 GN=PLS3 PE=1 SV=4	||C(ITC[C])HVVNIGAEDLR|C(ITC[C])HVVNIGAEDLR|C(ITC[C])HVVNIGAEDLR|C(ITC[C])HVVNIGAEDLR|C(ITC[C])HVVNIGAEDLR|C(ITC[C])HVVNIGAEDLR	||4|1|1|4|3|4	||0.91|0.89|1.14|1.0|0.93|0.905	||0.01915|NA|NA|0.23543|0.0|0.00577	0.9625	0.09517	17	6
O95486_388	SEC24A	SC24A_HUMAN Protein transport protein Sec24A OS=Homo sapiens OX=9606 GN=SEC24A PE=1 SV=2	|C(ITC[C])TLTSIPQTQALLNK|C(ITC[C])TLTSIPQTQALLNK|C(ITC[C])TLTSIPQTQALLNK||C(ITC[C])TLTSIPQTQALLNK|C(ITC[C])TLTSIPQTQALLNK|	|1|2|1||1|1|	|1.13|1.01|0.99||0.98|0.7|	|NA|0.09899|NA||NA|NA|	0.962	0.15834	6	5
Q8NFH5_255	NUP35	NUP35_HUMAN Nucleoporin NUP35 OS=Homo sapiens OX=9606 GN=NUP35 PE=1 SV=1	C(ITC[C])ALSSPSLAFTPPIK|C(ITC[C])ALSSPSLAFTPPIK|C(ITC[C])ALSSPSLAFTPPIK|C(ITC[C])ALSSPSLAFTPPIK|C(ITC[C])ALSSPSLAFTPPIK|C(ITC[C])ALSSPSLAFTPPIK|C(ITC[C])ALSSPSLAFTPPIK|C(ITC[C])ALSSPSLAFTPPIK	2|5|5|3|1|2|2|2	1.3|1.14|0.8|0.84|0.89|0.99|0.87|0.86	0.0|0.26486|0.0996|0.03055|NA|0.01414|0.0|0.02828	0.96125	0.17398	22	8
Q4J6C6_227	PREPL	PPCEL_HUMAN Prolyl endopeptidase-like OS=Homo sapiens OX=9606 GN=PREPL PE=1 SV=1	||C(ITC[C])HDVYR|C(ITC[C])HDVYR|||C(ITC[C])HDVYR|C(ITC[C])HDVYR	||1|2|||1|1	||0.83|0.935|||1.06|1.02	||NA|0.0495|||NA|NA	0.96125	0.10185	5	4
P49327_1828	FASN	FAS_HUMAN Fatty acid synthase OS=Homo sapiens OX=9606 GN=FASN PE=1 SV=3	C(ITC[C])TVFHGAQVEDAFR|C(ITC[C])TVFHGAQVEDAFR|C(ITC[C])TVFHGAQVEDAFR||C(ITC[C])TVFHGAQVEDAFR|C(ITC[C])TVFHGAQVEDAFR|C(ITC[C])TVFHGAQVEDAFR|C(ITC[C])TVFHGAQVEDAFR	10|10|2||3|5|5|6	0.75|0.715|1.235||0.89|0.98|1.07|1.08	0.05425|0.13189|0.02121||0.06429|0.11371|0.1638|0.08727	0.96	0.18777	41	7
P00390_102	GSR	GSHR_HUMAN Glutathione reductase, mitochondrial OS=Homo sapiens OX=9606 GN=GSR PE=1 SV=2	||C(ITC[C])VNVGCVPK|C(ITC[C])VNVGCVPK|C(ITC[C])VNVGCVPK|C(ITC[C])VNVGCVPK|C(ITC[C])VNVGCVPK|C(ITC[C])VNVGCVPK	||1|2|1|1|2|3	||1.02|0.91|1.02|0.86|1.0|0.95	||NA|0.0|NA|NA|0.0|0.10392	0.96	0.06542	10	6
P30101_85	PDIA3	PDIA3_HUMAN Protein disulfide-isomerase A3 OS=Homo sapiens OX=9606 GN=PDIA3 PE=1 SV=4	||C(ITC[C])TANTNTCNK|C(ITC[C])TANTNTCNK|C(ITC[C])TANTNTCNK|||C(ITC[C])TANTNTCNK	||1|1|1|||1	||1.0|0.93|0.99|||0.92	||NA|NA|NA|||NA	0.96	0.04082	4	4
P04843_477	RPN1	RPN1_HUMAN Dolichyl-diphosphooligosaccharide--protein glycosyltransferase subunit 1 OS=Homo sapiens OX=9606 GN=RPN1 PE=1 SV=1	C(ITC[C])ITEQVLTLVNK|C(ITC[C])ITEQVLTLVNK|C(ITC[C])ITEQVLTLVNK|C(ITC[C])ITEQVLTLVNK|||C(ITC[C])ITEQVLTLVNK|C(ITC[C])ITEQVLTLVNK	3|2|2|2|||3|2	1.39|1.25|0.735|0.55|||0.91|0.92	0.14048|0.12728|0.0495|0.07071|||0.10693|0.11314	0.95917	0.31363	14	6
P30519_265	HMOX2	HMOX2_HUMAN Heme oxygenase 2 OS=Homo sapiens OX=9606 GN=HMOX2 PE=1 SV=2	C(ITC[C])PFYAAEQDK|C(ITC[C])PFYAAEQDK|C(ITC[C])PFYAAEQDK|C(ITC[C])PFYAAEQDK|||C(ITC[C])PFYAAEQDK|C(ITC[C])PFYAAEQDK	2|2|4|2|||2|1	1.065|1.015|0.98|1.015|||0.79|0.89	0.12021|0.03536|0.03697|0.03536|||0.12728|NA	0.95917	0.10126	13	6
Q9P2J5_1053	LARS1	SYLC_HUMAN Leucine--tRNA ligase, cytoplasmic OS=Homo sapiens OX=9606 GN=LARS1 PE=1 SV=2	C(ITC[C])PGKPLNVFR|C(ITC[C])PGKPLNVFR|C(ITC[C])PGKPLNVFR|C(ITC[C])PGKPLNVFR|C(ITC[C])PGKPLNVFR|C(ITC[C])PGKPLNVFR|C(ITC[C])PGKPLNVFR|	1|2|3|5|1|1|2|	0.73|1.65|0.72|0.73|1.11|0.97|0.8|	NA|0.05657|0.03786|0.123|NA|NA|0.15556|	0.95857	0.33855	15	7
O75821_25	EIF3G	EIF3G_HUMAN Eukaryotic translation initiation factor 3 subunit G OS=Homo sapiens OX=9606 GN=EIF3G PE=1 SV=2	C(ITC[C])VTSELLK|C(ITC[C])VTSELLK|C(ITC[C])VTSELLK|C(ITC[C])VTSELLK||C(ITC[C])VTSELLK|C(ITC[C])VTSELLK|C(ITC[C])VTSELLK	1|1|1|1||2|3|2	0.61|0.61|1.29|1.29||0.91|1.02|0.975	NA|NA|NA|NA||0.02828|0.01528|0.06364	0.95786	0.27961	11	7
P78316_457	NOP14	NOP14_HUMAN Nucleolar protein 14 OS=Homo sapiens OX=9606 GN=NOP14 PE=1 SV=3	C(ITC[C])NHPSLAEGNK|C(ITC[C])NHPSLAEGNK|C(ITC[C])NHPSLAEGNK|C(ITC[C])NHPSLAEGNK|C(ITC[C])NHPSLAEGNK|C(ITC[C])NHPSLAEGNK|C(ITC[C])NHPSLAEGNK|	1|1|3|2|2|2|1|	0.62|0.82|1.16|1.07|0.94|0.845|1.25|	NA|NA|0.08327|0.08485|0.0|0.20506|NA|	0.95786	0.21794	12	7
O75607_79	NPM3	NPM3_HUMAN Nucleoplasmin-3 OS=Homo sapiens OX=9606 GN=NPM3 PE=1 SV=3	|C(ITC[C])NVVEVVAR|C(ITC[C])NVVEVVAR||||C(ITC[C])NVVEVVAR|C(ITC[C])NVVEVVAR	|1|1||||1|3	|0.57|1.21||||1.01|1.04	|NA|NA||||NA|0.08737	0.9575	0.27293	6	4
O15228_650	GNPAT	GNPAT_HUMAN Dihydroxyacetone phosphate acyltransferase OS=Homo sapiens OX=9606 GN=GNPAT PE=1 SV=1	||C(ITC[C])IFNVNEPATTK|C(ITC[C])IFNVNEPATTK|C(ITC[C])IFNVNEPATTK|C(ITC[C])IFNVNEPATTK|C(ITC[C])IFNVNEPATTK|C(ITC[C])IFNVNEPATTK	||2|1|1|3|2|2	||0.89|0.56|0.96|1.28|1.07|0.985	||0.18385|NA|NA|0.30567|0.29698|0.06364	0.9575	0.23664	11	6
P12004_81	PCNA	PCNA_HUMAN Proliferating cell nuclear antigen OS=Homo sapiens OX=9606 GN=PCNA PE=1 SV=1	C(ITC[C])AGNEDIITLR|C(ITC[C])AGNEDIITLR|C(ITC[C])AGNEDIITLR|C(ITC[C])AGNEDIITLR|C(ITC[C])AGNEDIITLR|C(ITC[C])AGNEDIITLR|C(ITC[C])AGNEDIITLR|C(ITC[C])AGNEDIITLR	10|8|3|3|5|4|3|2	1.07|1.095|0.98|0.98|0.92|0.89|0.85|0.87	0.12824|0.116|0.15011|0.01155|0.05848|0.02217|0.0|0.0	0.95687	0.09083	38	8
Q9BQ70_216	TCF25	TCF25_HUMAN Transcription factor 25 OS=Homo sapiens OX=9606 GN=TCF25 PE=1 SV=1	C(ITC[C])TWLTTPK|C(ITC[C])TWLTTPK|C(ITC[C])TWLTTPK|C(ITC[C])TWLTTPK|C(ITC[C])TWLTTPK|C(ITC[C])TWLTTPK||	1|1|1|2|2|1||	1.16|1.24|0.72|0.69|0.87|1.06||	NA|NA|NA|0.05657|0.02828|NA||	0.95667	0.23106	8	6
Q96KQ7_617	EHMT2	EHMT2_HUMAN Histone-lysine N-methyltransferase EHMT2 OS=Homo sapiens OX=9606 GN=EHMT2 PE=1 SV=3	C(ITC[C])LSAVGLPLGPGR|C(ITC[C])LSAVGLPLGPGR|C(ITC[C])LSAVGLPLGPGR|C(ITC[C])LSAVGLPLGPGR|||C(ITC[C])LSAVGLPLGPGR|C(ITC[C])LSAVGLPLGPGR	2|1|1|2|||2|1	1.0|0.93|1.03|0.945|||0.905|0.93	0.08485|NA|NA|0.03536|||0.09192|NA	0.95667	0.04792	9	6
Q5JSZ5_852	PRRC2B	PRC2B_HUMAN Protein PRRC2B OS=Homo sapiens OX=9606 GN=PRRC2B PE=1 SV=2	C(ITC[C])SPLEPDFVPDEK|C(ITC[C])SPLEPDFVPDEK|C(ITC[C])SPLEPDFVPDEK|C(ITC[C])SPLEPDFVPDEK||||	1|4|1|1||||	0.72|1.095|1.13|0.88||||	NA|0.2803|NA|NA||||	0.95625	0.19241	7	4
P25789_34	PSMA4	PSA4_HUMAN Proteasome subunit alpha type-4 OS=Homo sapiens OX=9606 GN=PSMA4 PE=1 SV=1	C(ITC[C])LGILANDGVLLAAER|C(ITC[C])LGILANDGVLLAAER|||||C(ITC[C])LGILANDGVLLAAER|C(ITC[C])LGILANDGVLLAAER	1|2|||||3|1	1.22|1.28|||||0.56|0.76	NA|0.0|||||0.0866|NA	0.955	0.35114	7	4
P13639_728	EEF2	EF2_HUMAN Elongation factor 2 OS=Homo sapiens OX=9606 GN=EEF2 PE=1 SV=4	C(ITC[C])LYASVLTAQPR|C(ITC[C])LYASVLTAQPR|C(ITC[C])LYASVLTAQPR|C(ITC[C])LYASVLTAQPR|C(ITC[C])LYASVLTAQPR|C(ITC[C])LYASVLTAQPR|C(ITC[C])LYASVLTAQPR|C(ITC[C])LYASVLTAQPR	6|8|8|9|5|6|5|5	1.2|1.27|0.685|0.66|1.02|1.055|0.92|0.83	0.0923|0.04941|0.04472|0.02062|0.03464|0.11041|0.17349|0.07014	0.955	0.22369	52	8
P33992_221	MCM5	MCM5_HUMAN DNA replication licensing factor MCM5 OS=Homo sapiens OX=9606 GN=MCM5 PE=1 SV=5	C(ITC[C])VDFQTLK|C(ITC[C])VDFQTLK|C(ITC[C])VDFQTLK|C(ITC[C])VDFQTLK||C(ITC[C])VDFQTLK|C(ITC[C])VDFQTLK|C(ITC[C])VDFQTLK	4|5|5|4||3|3|4	1.135|1.19|0.73|0.82||1.02|0.91|0.88	0.05679|0.08544|0.04062|0.13401||0.06351|0.06351|0.09	0.955	0.16751	28	7
Q13155_291	AIMP2	AIMP2_HUMAN Aminoacyl tRNA synthase complex-interacting multifunctional protein 2 OS=Homo sapiens OX=9606 GN=AIMP2 PE=1 SV=2	C(ITC[C])SVTVPANVQR||C(ITC[C])SVTVPANVQR|C(ITC[C])SVTVPANVQR|C(ITC[C])SVTVPANVQR|C(ITC[C])SVTVPANVQR|C(ITC[C])SVTVPANVQR|C(ITC[C])SVTVPANVQR	1||2|1|2|1|2|2	0.77||1.005|0.97|0.995|1.07|0.895|0.98	NA||0.06364|NA|0.02121|NA|0.02121|0.01414	0.955	0.09661	11	7
Q15477_579	SKIV2L	SKIV2_HUMAN Helicase SKI2W OS=Homo sapiens OX=9606 GN=SKIV2L PE=1 SV=3	C(ITC[C])DEQASGLTSLDLTTSSEK||C(ITC[C])DEQASGLTSLDLTTSSEK|C(ITC[C])DEQASGLTSLDLTTSSEK||||	1||2|3||||	1.23||0.68|0.95||||	NA||0.0|0.02887||||	0.95333	0.27502	6	3
P14678_19	SNRPB	RSMB_HUMAN Small nuclear ribonucleoprotein-associated proteins B and B' OS=Homo sapiens OX=9606 GN=SNRPB PE=1 SV=2	C(ITC[C])ILQDGR|C(ITC[C])ILQDGR|C(ITC[C])ILQDGR|C(ITC[C])ILQDGR|C(ITC[C])ILQDGR|C(ITC[C])ILQDGR|C(ITC[C])ILQDGR|C(ITC[C])ILQDGR	2|4|4|7|1|1|3|5	1.19|1.115|0.72|0.72|1.0|1.01|0.93|0.94	0.01414|0.12553|0.00816|0.0637|NA|NA|0.03786|0.07918	0.95312	0.16782	27	8
P46013_3014	MKI67	KI67_HUMAN Proliferation marker protein Ki-67 OS=Homo sapiens OX=9606 GN=MKI67 PE=1 SV=2	C(ITC[C])MPAPEEIVEELPASK|C(ITC[C])MPAPEEIVEELPASK|C(ITC[C])MPAPEEIVEELPASK|C(ITC[C])MPAPEEIVEELPASK|C(ITC[C])MPAPEEIVEELPASK|C(ITC[C])MPAPEEIVEELPASK||C(ITC[C])MPAPEEIVEELPASK	3|4|4|2|1|1||2	0.53|0.545|1.425|1.345|0.88|0.88||1.065	0.17673|0.08206|1.52015|0.00707|NA|NA||0.12021	0.95286	0.35238	17	7
Q99536_50	VAT1	VAT1_HUMAN Synaptic vesicle membrane protein VAT-1 homolog OS=Homo sapiens OX=9606 GN=VAT1 PE=1 SV=2	C(ITC[C])LVLTGFGGYDK|C(ITC[C])LVLTGFGGYDK|C(ITC[C])LVLTGFGGYDK|C(ITC[C])LVLTGFGGYDK|C(ITC[C])LVLTGFGGYDK||C(ITC[C])LVLTGFGGYDK|C(ITC[C])LVLTGFGGYDK	4|2|3|5|2||3|2	1.09|1.21|0.65|1.18|1.06||0.64|0.84	0.3319|0.0|0.51733|0.32863|0.0||0.17321|0.21213	0.95286	0.24164	21	7
Q15024_34	EXOSC7	EXOS7_HUMAN Exosome complex component RRP42 OS=Homo sapiens OX=9606 GN=EXOSC7 PE=1 SV=3	C(ITC[C])VEVETDVVSNTSGSAR|C(ITC[C])VEVETDVVSNTSGSAR|C(ITC[C])VEVETDVVSNTSGSAR|C(ITC[C])VEVETDVVSNTSGSAR|C(ITC[C])VEVETDVVSNTSGSAR|C(ITC[C])VEVETDVVSNTSGSAR|C(ITC[C])VEVETDVVSNTSGSAR|C(ITC[C])VEVETDVVSNTSGSAR	11|9|6|7|2|2|3|4	0.47|0.53|1.355|1.25|1.09|0.98|0.91|1.035	0.12321|0.15029|1.36849|0.13247|0.31113|0.01414|0.38314|0.12396	0.9525	0.31398	44	8
Q8ND82_242	ZNF280C	Z280C_HUMAN Zinc finger protein 280C OS=Homo sapiens OX=9606 GN=ZNF280C PE=1 SV=1	|C(ITC[C])NVQFNLLDPLK||C(ITC[C])NVQFNLLDPLK|||C(ITC[C])NVQFNLLDPLK|C(ITC[C])NVQFNLLDPLK	|1||2|||1|2	|0.71||1.03|||0.97|1.1	|NA||0.0|||NA|0.0	0.9525	0.17017	6	4
Q96EY5_33	MVB12A	MB12A_HUMAN Multivesicular body subunit 12A OS=Homo sapiens OX=9606 GN=MVB12A PE=1 SV=1	||||C(ITC[C])TVEGAPASFGK|C(ITC[C])TVEGAPASFGK|C(ITC[C])TVEGAPASFGK|C(ITC[C])TVEGAPASFGK	||||1|1|1|2	||||0.91|1.18|0.84|0.88	||||NA|NA|NA|0.08485	0.9525	0.15435	5	4
Q7Z460_8	CLASP1	CLAP1_HUMAN CLIP-associating protein 1 OS=Homo sapiens OX=9606 GN=CLASP1 PE=1 SV=1	C(ITC[C])LAQVLQK|C(ITC[C])LAQVLQK||C(ITC[C])LAQVLQK|C(ITC[C])LAQVLQK||C(ITC[C])LAQVLQK|C(ITC[C])LAQVLQK	1|1||2|1||1|1	0.86|1.13||0.925|1.06||0.88|0.86	NA|NA||0.19092|NA||NA|NA	0.9525	0.11505	7	6
Q14498_478	RBM39	RBM39_HUMAN RNA-binding protein 39 OS=Homo sapiens OX=9606 GN=RBM39 PE=1 SV=2	C(ITC[C])PSIAAAIAAVNALHGR|C(ITC[C])PSIAAAIAAVNALHGR|C(ITC[C])PSIAAAIAAVNALHGR||C(ITC[C])PSIAAAIAAVNALHGR|C(ITC[C])PSIAAAIAAVNALHGR|C(ITC[C])PSIAAAIAAVNALHGR|C(ITC[C])PSIAAAIAAVNALHGR	2|2|2||5|1|4|2	0.825|1.01|1.2||0.93|1.02|1.02|0.66	0.17678|0.0|0.0||0.09731|NA|0.0263|0.0	0.95214	0.17127	18	7
P31943_267	HNRNPH1	HNRH1_HUMAN Heterogeneous nuclear ribonucleoprotein H OS=Homo sapiens OX=9606 GN=HNRNPH1 PE=1 SV=4	C(ITC[C])FSGMSDHR|C(ITC[C])FSGMSDHR|C(ITC[C])FSGMSDHR||C(ITC[C])FSGMSDHR|C(ITC[C])FSGMSDHR||C(ITC[C])FSGMSDHR	3|3|6||6|7||11	1.19|1.2|0.585||0.975|0.99||0.77	0.09644|0.12014|0.06022||0.06408|0.2983||0.08807	0.95167	0.23997	36	6
A5YKK6_1932	CNOT1	CNOT1_HUMAN CCR4-NOT transcription complex subunit 1 OS=Homo sapiens OX=9606 GN=CNOT1 PE=1 SV=2	C(ITC[C])YHNLDAFVR|C(ITC[C])YHNLDAFVR|C(ITC[C])YHNLDAFVR||C(ITC[C])YHNLDAFVR|C(ITC[C])YHNLDAFVR||C(ITC[C])YHNLDAFVR	1|3|1||1|1||1	1.04|1.06|0.55||1.05|0.88||1.13	NA|0.19553|NA||NA|NA||NA	0.95167	0.2133	8	6
Q86U86_1233	PBRM1	PB1_HUMAN Protein polybromo-1 OS=Homo sapiens OX=9606 GN=PBRM1 PE=1 SV=1	C(ITC[C])AVLSFK|C(ITC[C])AVLSFK|C(ITC[C])AVLSFK|C(ITC[C])AVLSFK|C(ITC[C])AVLSFK||C(ITC[C])AVLSFK|	2|2|2|1|1||1|	1.17|1.105|0.685|0.83|1.14||0.78|	0.08485|0.0495|0.06364|NA|NA||NA|	0.95167	0.21073	9	6
P62633_97	CNBP	CNBP_HUMAN Cellular nucleic acid-binding protein OS=Homo sapiens OX=9606 GN=CNBP PE=1 SV=1	||C(ITC[C])CYNCGK||||C(ITC[C])CYNCGK|C(ITC[C])CYNCGK	||2||||2|1	||1.145||||0.91|0.8	||0.14849||||0.02828|NA	0.95167	0.17623	5	3
P27448_213	MARK3	MARK3_HUMAN MAP/microtubule affinity-regulating kinase 3 OS=Homo sapiens OX=9606 GN=MARK3 PE=1 SV=5	|||||C(ITC[C])GSPPYAAPELFQGK|C(ITC[C])GSPPYAAPELFQGK|C(ITC[C])GSPPYAAPELFQGK	|||||2|3|1	|||||1.015|0.87|0.97	|||||0.23335|0.07506|NA	0.95167	0.07422	6	3
Q9BRP1_100	PDCD2L	PDD2L_HUMAN Programmed cell death protein 2-like OS=Homo sapiens OX=9606 GN=PDCD2L PE=1 SV=1	|||||C(ITC[C])LQVPER|C(ITC[C])LQVPER|C(ITC[C])LQVPER	|||||1|2|1	|||||0.89|0.985|0.98	|||||NA|0.03536|NA	0.95167	0.05346	4	3
Q92552_49	MRPS27	RT27_HUMAN 28S ribosomal protein S27, mitochondrial OS=Homo sapiens OX=9606 GN=MRPS27 PE=1 SV=3	C(ITC[C])LADLASLMDK|C(ITC[C])LADLASLMDK|C(ITC[C])LADLASLMDK|C(ITC[C])LADLASLMDK|C(ITC[C])LADLASLMDK||C(ITC[C])LADLASLMDK|C(ITC[C])LADLASLMDK	4|4|1|1|3||4|7	1.145|1.135|0.88|0.75|0.87||1.1|0.78	0.10372|0.25773|NA|NA|0.06928||0.12|0.19416	0.95143	0.17075	24	7
Q16763_118	UBE2S	UBE2S_HUMAN Ubiquitin-conjugating enzyme E2 S OS=Homo sapiens OX=9606 GN=UBE2S PE=1 SV=2	C(ITC[C])LLIHPNPESALNEEAGR|C(ITC[C])LLIHPNPESALNEEAGR|C(ITC[C])LLIHPNPESALNEEAGR|C(ITC[C])LLIHPNPESALNEEAGR|C(ITC[C])LLIHPNPESALNEEAGR|C(ITC[C])LLIHPNPESALNEEAGR|C(ITC[C])LLIHPNPESALNEEAGR|C(ITC[C])LLIHPNPESALNEEAGR	4|3|3|4|4|3|3|4	0.95|1.04|0.88|0.94|0.96|0.9|0.99|0.95	0.08995|0.04041|0.02|0.06557|0.05315|0.01155|0.08737|0.075	0.95125	0.0497	28	8
O43395_630	PRPF3	PRPF3_HUMAN U4/U6 small nuclear ribonucleoprotein Prp3 OS=Homo sapiens OX=9606 GN=PRPF3 PE=1 SV=2	C(ITC[C])VLVWEGTAK|C(ITC[C])VLVWEGTAK|C(ITC[C])VLVWEGTAK||||C(ITC[C])VLVWEGTAK|C(ITC[C])VLVWEGTAK	1|1|2||||1|2	0.84|0.89|0.87||||0.94|1.215	NA|NA|0.04243||||NA|0.02121	0.951	0.152	7	5
P26196_324	DDX6	DDX6_HUMAN Probable ATP-dependent RNA helicase DDX6 OS=Homo sapiens OX=9606 GN=DDX6 PE=1 SV=2	|C(ITC[C])LNTLFSR|C(ITC[C])LNTLFSR|C(ITC[C])LNTLFSR|C(ITC[C])LNTLFSR|C(ITC[C])LNTLFSR||	|1|1|1|2|2||	|0.86|0.92|0.98|1.0|0.995||	|NA|NA|NA|0.01414|0.06364||	0.951	0.06004	7	5
Q9P2J5_70	LARS1	SYLC_HUMAN Leucine--tRNA ligase, cytoplasmic OS=Homo sapiens OX=9606 GN=LARS1 PE=1 SV=2	C(ITC[C])EFAVGYQR|C(ITC[C])EFAVGYQR|C(ITC[C])EFAVGYQR|C(ITC[C])EFAVGYQR|C(ITC[C])EFAVGYQR|C(ITC[C])EFAVGYQR|C(ITC[C])EFAVGYQR|C(ITC[C])EFAVGYQR	3|3|1|2|3|2|3|3	1.53|1.35|0.74|0.73|0.97|0.805|0.67|0.81	0.12767|0.17321|NA|0.0|0.19468|0.2192|0.02887|0.12097	0.95062	0.3181	20	8
Q15678_133	PTPN14	PTN14_HUMAN Tyrosine-protein phosphatase non-receptor type 14 OS=Homo sapiens OX=9606 GN=PTPN14 PE=1 SV=2	||C(ITC[C])TLDQVIR|C(ITC[C])TLDQVIR||C(ITC[C])TLDQVIR||	||1|1||1||	||0.91|0.71||1.23||	||NA|NA||NA||	0.95	0.2623	3	3
Q9BSC4_79	NOL10	NOL10_HUMAN Nucleolar protein 10 OS=Homo sapiens OX=9606 GN=NOL10 PE=1 SV=1	|C(ITC[C])YDTYQLSLK||C(ITC[C])YDTYQLSLK|C(ITC[C])YDTYQLSLK|||	|1||1|1|||	|0.73||0.99|1.13|||	|NA||NA|NA|||	0.95	0.20298	3	3
Q92945_379	KHSRP	FUBP2_HUMAN Far upstream element-binding protein 2 OS=Homo sapiens OX=9606 GN=KHSRP PE=1 SV=4	C(ITC[C])EHAAR|C(ITC[C])EHAAR|C(ITC[C])EHAAR|||||	2|1|1|||||	0.77|0.97|1.11|||||	0.0|NA|NA|||||	0.95	0.17088	4	3
Q7Z2W4_38	ZC3HAV1	ZCCHV_HUMAN Zinc finger CCCH-type antiviral protein 1 OS=Homo sapiens OX=9606 GN=ZC3HAV1 PE=1 SV=3	||||C(ITC[C])EVLQVAGPDR||C(ITC[C])EVLQVAGPDR|C(ITC[C])EVLQVAGPDR	||||3||2|4	||||1.07||0.86|0.92	||||0.14434||0.0|0.0818	0.95	0.10817	9	3
Q13371_35	PDCL	PHLP_HUMAN Phosducin-like protein OS=Homo sapiens OX=9606 GN=PDCL PE=1 SV=3	C(ITC[C])APASSSVPAEAELAGEGISVNTGPK|C(ITC[C])APASSSVPAEAELAGEGISVNTGPK|C(ITC[C])APASSSVPAEAELAGEGISVNTGPK|C(ITC[C])APASSSVPAEAELAGEGISVNTGPK||||	3|1|3|2||||	0.85|0.98|0.94|1.03||||	0.03786|NA|0.04163|0.04243||||	0.95	0.07616	9	4
P37837_250	TALDO1	TALDO_HUMAN Transaldolase OS=Homo sapiens OX=9606 GN=TALDO1 PE=1 SV=2	C(ITC[C])DFLTISPK|C(ITC[C])DFLTISPK|C(ITC[C])DFLTISPK|C(ITC[C])DFLTISPK|C(ITC[C])DFLTISPK|C(ITC[C])DFLTISPK|C(ITC[C])DFLTISPK|C(ITC[C])DFLTISPK	5|2|3|4|4|4|4|3	0.98|0.99|1.02|0.875|0.98|0.965|0.89|0.9	0.10738|0.0|0.12124|0.06856|0.11558|0.02944|0.02|0.01528	0.95	0.05379	29	8
P27816_635	MAP4	MAP4_HUMAN Microtubule-associated protein 4 OS=Homo sapiens OX=9606 GN=MAP4 PE=1 SV=3	C(ITC[C])SLPAEEDSVLEK|C(ITC[C])SLPAEEDSVLEK|C(ITC[C])SLPAEEDSVLEK|C(ITC[C])SLPAEEDSVLEK||C(ITC[C])SLPAEEDSVLEK|C(ITC[C])SLPAEEDSVLEK|	3|3|3|1||1|1|	0.52|0.83|1.38|1.39||0.62|0.95|	0.18475|0.06807|0.3774|NA||NA|NA|	0.94833	0.37059	12	6
P54136_115	RARS1	SYRC_HUMAN Arginine--tRNA ligase, cytoplasmic OS=Homo sapiens OX=9606 GN=RARS1 PE=1 SV=2	C(ITC[C])NSAMGISQMLK|C(ITC[C])NSAMGISQMLK|C(ITC[C])NSAMGISQMLK|||||	2|1|3|||||	1.335|0.7|0.81|||||	0.14849|NA|0.14742|||||	0.94833	0.33935	6	3
Q7Z7H8_180	MRPL10	RM10_HUMAN 39S ribosomal protein L10, mitochondrial OS=Homo sapiens OX=9606 GN=MRPL10 PE=1 SV=3	C(ITC[C])IDDTILSR|C(ITC[C])IDDTILSR||C(ITC[C])IDDTILSR|C(ITC[C])IDDTILSR||C(ITC[C])IDDTILSR|C(ITC[C])IDDTILSR	1|1||1|2||2|3	1.53|0.91||0.68|0.895||0.765|0.91	NA|NA||NA|0.03536||0.03536|0.13279	0.94833	0.29991	10	6
O75694_974	NUP155	NU155_HUMAN Nuclear pore complex protein Nup155 OS=Homo sapiens OX=9606 GN=NUP155 PE=1 SV=1	|C(ITC[C])ITDTLQELVNQSK|C(ITC[C])ITDTLQELVNQSK|C(ITC[C])ITDTLQELVNQSK|C(ITC[C])ITDTLQELVNQSK||C(ITC[C])ITDTLQELVNQSK|C(ITC[C])ITDTLQELVNQSK	|4|4|4|1||2|1	|1.33|0.675|0.75|0.96||1.16|0.81	|0.69274|0.01414|0.04203|NA||0.0|NA	0.9475	0.25447	16	6
P49790_21	NUP153	NU153_HUMAN Nuclear pore complex protein Nup153 OS=Homo sapiens OX=9606 GN=NUP153 PE=1 SV=2	C(ITC[C])HQGPIKPYQQGR|C(ITC[C])HQGPIKPYQQGR|C(ITC[C])HQGPIKPYQQGR|C(ITC[C])HQGPIKPYQQGR||||	1|1|2|2||||	0.66|0.89|1.215|1.025||||	NA|NA|0.27577|0.0495||||	0.9475	0.23347	6	4
P07737_128	PFN1	PROF1_HUMAN Profilin-1 OS=Homo sapiens OX=9606 GN=PFN1 PE=1 SV=2	C(ITC[C])YEMASHLR|C(ITC[C])YEMASHLR|C(ITC[C])YEMASHLR|C(ITC[C])YEMASHLR|C(ITC[C])YEMASHLR|C(ITC[C])YEMASHLR|C(ITC[C])YEMASHLR|C(ITC[C])YEMASHLR	26|25|5|4|4|2|2|2	1.405|1.37|0.82|0.94|0.905|0.69|0.525|0.92	0.23069|1.27616|0.04712|0.12463|1.73333|0.62225|0.50205|0.0	0.94688	0.30508	70	8
Q92616_2558	GCN1	GCN1_HUMAN eIF-2-alpha kinase activator GCN1 OS=Homo sapiens OX=9606 GN=GCN1 PE=1 SV=6	C(ITC[C])LQNPSSDIR|C(ITC[C])LQNPSSDIR|C(ITC[C])LQNPSSDIR|C(ITC[C])LQNPSSDIR|C(ITC[C])LQNPSSDIR|C(ITC[C])LQNPSSDIR|C(ITC[C])LQNPSSDIR|C(ITC[C])LQNPSSDIR	5|2|3|4|3|2|3|2	1.5|1.35|0.61|0.595|0.96|1.05|0.76|0.75	0.47982|0.21213|0.01528|0.1885|0.00577|0.0|0.0|0.0	0.94687	0.33599	24	8
Q9BTW9_905	TBCD	TBCD_HUMAN Tubulin-specific chaperone D OS=Homo sapiens OX=9606 GN=TBCD PE=1 SV=2	|C(ITC[C])VAQQASEK||C(ITC[C])VAQQASEK|||C(ITC[C])VAQQASEK|	|1||1|||1|	|1.26||0.56|||1.02|	|NA||NA|||NA|	0.94667	0.35572	3	3
Q02241_483	KIF23	KIF23_HUMAN Kinesin-like protein KIF23 OS=Homo sapiens OX=9606 GN=KIF23 PE=1 SV=3	|||C(ITC[C])EILDINDEQTLPR||C(ITC[C])EILDINDEQTLPR||C(ITC[C])EILDINDEQTLPR	|||1||1||1	|||0.76||0.99||1.09	|||NA||NA||NA	0.94667	0.16921	3	3
Q8NEB9_336	PIK3C3	PK3C3_HUMAN Phosphatidylinositol 3-kinase catalytic subunit type 3 OS=Homo sapiens OX=9606 GN=PIK3C3 PE=1 SV=1	C(ITC[C])VNWDLPQEAK|C(ITC[C])VNWDLPQEAK|C(ITC[C])VNWDLPQEAK|||||	1|1|2|||||	1.09|0.9|0.85|||||	NA|NA|0.0|||||	0.94667	0.12662	4	3
Q9NQ88_161	TIGAR	TIGAR_HUMAN Fructose-2,6-bisphosphatase TIGAR OS=Homo sapiens OX=9606 GN=TIGAR PE=1 SV=1	C(ITC[C])LETSLAEIFPLGK||||||C(ITC[C])LETSLAEIFPLGK|C(ITC[C])LETSLAEIFPLGK	2||||||2|2	1.09||||||0.87|0.88	0.0||||||0.0|0.0	0.94667	0.12423	6	3
Q9BPX3_509	NCAPG	CND3_HUMAN Condensin complex subunit 3 OS=Homo sapiens OX=9606 GN=NCAPG PE=1 SV=1	||C(ITC[C])ITLQDFNR|C(ITC[C])ITLQDFNR|||C(ITC[C])ITLQDFNR|	||1|1|||1|	||1.02|1.0|||0.82|	||NA|NA|||NA|	0.94667	0.11015	3	3
Q8WUY1_85	THEM6	THEM6_HUMAN Protein THEM6 OS=Homo sapiens OX=9606 GN=THEM6 PE=1 SV=2	|C(ITC[C])GVLGALR|C(ITC[C])GVLGALR|C(ITC[C])GVLGALR|C(ITC[C])GVLGALR|C(ITC[C])GVLGALR||C(ITC[C])GVLGALR	|1|2|1|1|1||1	|0.95|0.825|0.82|1.02|1.14||0.92	|NA|0.00707|NA|NA|NA||NA	0.94583	0.12192	7	6
Q05655_344	PRKCD	KPCD_HUMAN Protein kinase C delta type OS=Homo sapiens OX=9606 GN=PRKCD PE=1 SV=2	C(ITC[C])NINNFIFHK|C(ITC[C])NINNFIFHK|C(ITC[C])NINNFIFHK|C(ITC[C])NINNFIFHK|C(ITC[C])NINNFIFHK|C(ITC[C])NINNFIFHK|C(ITC[C])NINNFIFHK|	4|3|3|1|2|2|2|	0.375|0.82|1.41|1.27|0.83|0.95|0.96|	0.25252|0.14|0.01155|NA|0.0|0.0|0.05657|	0.945	0.33562	17	7
P55010_59	EIF5	IF5_HUMAN Eukaryotic translation initiation factor 5 OS=Homo sapiens OX=9606 GN=EIF5 PE=1 SV=2	C(ITC[C])ELGAQTQFDVK|C(ITC[C])ELGAQTQFDVK||C(ITC[C])ELGAQTQFDVK||C(ITC[C])ELGAQTQFDVK||	1|1||1||1||	0.68|0.81||1.29||1.0||	NA|NA||NA||NA||	0.945	0.26489	4	4
Q7Z417_234	NUFIP2	NUFP2_HUMAN Nuclear fragile X mental retardation-interacting protein 2 OS=Homo sapiens OX=9606 GN=NUFIP2 PE=1 SV=1	||||C(ITC[C])ENLNIVQDK|C(ITC[C])ENLNIVQDK|C(ITC[C])ENLNIVQDK|C(ITC[C])ENLNIVQDK	||||1|1|1|1	||||1.08|1.07|0.96|0.67	||||NA|NA|NA|NA	0.945	0.19122	4	4
P62633_140	CNBP	CNBP_HUMAN Cellular nucleic acid-binding protein OS=Homo sapiens OX=9606 GN=CNBP PE=1 SV=1	|C(ITC[C])GETGHVAINCSK|C(ITC[C])GETGHVAINCSK|C(ITC[C])GETGHVAINCSK||||	|2|3|2||||	|0.74|1.09|1.005||||	|0.11314|0.09238|0.12021||||	0.945	0.18255	7	3
P47712_726	PLA2G4A	PA24A_HUMAN Cytosolic phospholipase A2 OS=Homo sapiens OX=9606 GN=PLA2G4A PE=1 SV=2	||C(ITC[C])SVSLSNVEAR|C(ITC[C])SVSLSNVEAR|C(ITC[C])SVSLSNVEAR|C(ITC[C])SVSLSNVEAR||C(ITC[C])SVSLSNVEAR	||2|1|1|1||1	||1.025|0.9|0.94|1.05||0.81	||0.17678|NA|NA|NA||NA	0.945	0.09708	6	5
P78347_215	GTF2I	GTF2I_HUMAN General transcription factor II-I OS=Homo sapiens OX=9606 GN=GTF2I PE=1 SV=2	SILSPGGSC(ITC[C])GPIK|SILSPGGSC(ITC[C])GPIK|SILSPGGSC(ITC[C])GPIK|SILSPGGSC(ITC[C])GPIK|SILSPGGSC(ITC[C])GPIKVK SILSPGGSC(ITC[C])GPIK|SILSPGGSC(ITC[C])GPIKVK SILSPGGSC(ITC[C])GPIK|SILSPGGSC(ITC[C])GPIKVK SILSPGGSC(ITC[C])GPIK|SILSPGGSC(ITC[C])GPIKVK SILSPGGSC(ITC[C])GPIK	3|2|4|6|4|4|4|5	0.94|1.0|0.84|0.89|0.96|1.06|0.935|0.93	0.17214|0.0|0.13048|0.07005|0.11328|0.04761|0.32098|0.1247	0.94437	0.06641	32	8
Q9BTC0_455	DIDO1	DIDO1_HUMAN Death-inducer obliterator 1 OS=Homo sapiens OX=9606 GN=DIDO1 PE=1 SV=5	|C(ITC[C])GAQAGIK|C(ITC[C])GAQAGIK|C(ITC[C])GAQAGIK|C(ITC[C])GAQAGIK|||C(ITC[C])GAQAGIK	|1|2|1|1|||2	|0.63|1.14|1.04|0.99|||0.92	|NA|0.0|NA|NA|||0.0	0.944	0.19295	7	5
Q9P2N5_49	RBM27	RBM27_HUMAN RNA-binding protein 27 OS=Homo sapiens OX=9606 GN=RBM27 PE=1 SV=2	||C(ITC[C])ADQLDVFLQK||C(ITC[C])ADQLDVFLQK||C(ITC[C])ADQLDVFLQK|C(ITC[C])ADQLDVFLQK	||1||3||1|2	||0.79||1.38||0.79|0.815	||NA||0.28868||NA|0.14849	0.94375	0.29107	7	4
P10599_73	TXN	THIO_HUMAN Thioredoxin OS=Homo sapiens OX=9606 GN=TXN PE=1 SV=3	C(ITC[C])MPTFQFFK|C(ITC[C])MPTFQFFK|C(ITC[C])MPTFQFFK|C(ITC[C])MPTFQFFK|C(ITC[C])MPTFQFFK|C(ITC[C])MPTFQFFK|C(ITC[C])MPTFQFFK|C(ITC[C])MPTFQFFK	23|20|9|9|8|8|9|8	1.39|1.3|0.89|0.88|0.705|0.72|0.83|0.835	0.20453|0.11487|0.10333|0.09519|0.02722|0.06578|0.08838|0.0377	0.94375	0.25769	94	8
Q96AG4_59	LRRC59	LRC59_HUMAN Leucine-rich repeat-containing protein 59 OS=Homo sapiens OX=9606 GN=LRRC59 PE=1 SV=1	|C(ITC[C])GLTHLVK|||C(ITC[C])GLTHLVK|C(ITC[C])GLTHLVK||	|1|||1|1||	|0.72|||0.94|1.17||	|NA|||NA|NA||	0.94333	0.22502	3	3
P22087_268	FBL	FBRL_HUMAN rRNA 2'-O-methyltransferase fibrillarin OS=Homo sapiens OX=9606 GN=FBL PE=1 SV=2	C(ITC[C])IDSTASAEAVFASEVK|C(ITC[C])IDSTASAEAVFASEVK||||||C(ITC[C])IDSTASAEAVFASEVK	3|3||||||1	0.98|0.74||||||1.11	0.09539|0.06028||||||NA	0.94333	0.18771	7	3
Q8IY67_161	RAVER1	RAVR1_HUMAN Ribonucleoprotein PTB-binding 1 OS=Homo sapiens OX=9606 GN=RAVER1 PE=1 SV=1	C(ITC[C])FLVYSER|C(ITC[C])FLVYSER|C(ITC[C])FLVYSER|||||	2|1|1|||||	0.79|0.92|1.12|||||	0.04243|NA|NA|||||	0.94333	0.16623	4	3
Q13541_7	EIF4EBP1	4EBP1_HUMAN Eukaryotic translation initiation factor 4E-binding protein 1 OS=Homo sapiens OX=9606 GN=EIF4EBP1 PE=1 SV=3	C(ITC[C])SQTPSR|||C(ITC[C])SQTPSR||||C(ITC[C])SQTPSR	1|||1||||1	0.85|||0.96||||1.02	NA|||NA||||NA	0.94333	0.08622	3	3
P34897_91	SHMT2	GLYM_HUMAN Serine hydroxymethyltransferase, mitochondrial OS=Homo sapiens OX=9606 GN=SHMT2 PE=1 SV=3	|AALEALGSC(ITC[C])LNNK|AALEALGSC(ITC[C])LNNK||AALEALGSC(ITC[C])LNNK|||	|1|2||1|||	|1.01|0.94||0.88|||	|NA|0.14142||NA|||	0.94333	0.06506	4	3
O75663_75	TIPRL	TIPRL_HUMAN TIP41-like protein OS=Homo sapiens OX=9606 GN=TIPRL PE=1 SV=2	C(ITC[C])VNNYQGMLK|C(ITC[C])VNNYQGMLK|C(ITC[C])VNNYQGMLK|C(ITC[C])VNNYQGMLK|C(ITC[C])VNNYQGMLK|C(ITC[C])VNNYQGMLK|C(ITC[C])VNNYQGMLK|	6|3|2|1|2|1|1|	0.7|0.79|1.095|1.19|0.975|1.02|0.83|	0.15158|0.06245|0.09192|NA|0.06364|NA|NA|	0.94286	0.17621	16	7
Q8N0X7_562	SPART	SPART_HUMAN Spartin OS=Homo sapiens OX=9606 GN=SPART PE=1 SV=1	C(ITC[C])IVNNVSAETVQTVR||C(ITC[C])IVNNVSAETVQTVR|C(ITC[C])IVNNVSAETVQTVR|C(ITC[C])IVNNVSAETVQTVR|C(ITC[C])IVNNVSAETVQTVR|C(ITC[C])IVNNVSAETVQTVR|C(ITC[C])IVNNVSAETVQTVR	1||2|1|1|1|2|2	0.92||0.75|0.73|1.02|1.18|1.015|0.985	NA||0.0|NA|NA|NA|0.03536|0.02121	0.94286	0.15927	10	7
Q6SZW1_311	SARM1	SARM1_HUMAN NAD(+) hydrolase SARM1 OS=Homo sapiens OX=9606 GN=SARM1 PE=1 SV=1	C(ITC[C])LVDASDTSQGR|C(ITC[C])LVDASDTSQGR|C(ITC[C])LVDASDTSQGR|C(ITC[C])LVDASDTSQGR|||C(ITC[C])LVDASDTSQGR|C(ITC[C])LVDASDTSQGR	2|2|3|1|||2|2	1.47|1.065|0.72|0.69|||0.91|0.8	0.0|0.03536|0.01732|NA|||0.28284|0.0	0.9425	0.29254	12	6
P49411_147	TUFM	EFTU_HUMAN Elongation factor Tu, mitochondrial OS=Homo sapiens OX=9606 GN=TUFM PE=1 SV=2	C(ITC[C])ILVVAANDGPMPQTR|C(ITC[C])ILVVAANDGPMPQTR|C(ITC[C])ILVVAANDGPMPQTR|C(ITC[C])ILVVAANDGPMPQTR|C(ITC[C])ILVVAANDGPMPQTR|C(ITC[C])ILVVAANDGPMPQTR|C(ITC[C])ILVVAANDGPMPQTR|C(ITC[C])ILVVAANDGPMPQTR	4|1|1|4|4|2|3|4	1.16|1.12|0.76|0.625|0.975|1.035|0.96|0.895	0.12816|NA|NA|0.20304|0.29228|0.06364|0.19604|0.09323	0.94125	0.17932	23	8
Q13464_1281	ROCK1	ROCK1_HUMAN Rho-associated protein kinase 1 OS=Homo sapiens OX=9606 GN=ROCK1 PE=1 SV=1	EDLIC(ITC[C])PCK|EDLIC(ITC[C])PCK|EDLIC(ITC[C])PCK|EDLIC(ITC[C])PCK|EDLIC(ITC[C])PCK|EDLIC(ITC[C])PCK|EDLIC(ITC[C])PCK|EDLIC(ITC[C])PCK	4|5|2|4|1|1|1|2	1.425|1.43|0.68|0.78|0.75|0.72|0.84|0.9	0.0818|0.15931|0.02828|0.06191|NA|NA|NA|0.01414	0.94063	0.30813	20	8
Q9UBF2_44	COPG2	COPG2_HUMAN Coatomer subunit gamma-2 OS=Homo sapiens OX=9606 GN=COPG2 PE=1 SV=1	C(ITC[C])LHILTK|C(ITC[C])LHILTK|C(ITC[C])LHILTK||C(ITC[C])LHILTK|C(ITC[C])LHILTK|C(ITC[C])LHILTK|C(ITC[C])LHILTK	5|3|3||1|3|2|2	1.15|1.32|0.61||1.0|0.91|0.79|0.8	0.25774|11.10668|0.23116||NA|0.1365|0.14142|0.09899	0.94	0.23944	19	7
P62837_111	UBE2D2	UB2D2_HUMAN Ubiquitin-conjugating enzyme E2 D2 OS=Homo sapiens OX=9606 GN=UBE2D2 PE=1 SV=1	|C(ITC[C])DPNPDDPLVPEIAR|C(ITC[C])DPNPDDPLVPEIAR|C(ITC[C])DPNPDDPLVPEIAR|||C(ITC[C])DPNPDDPLVPEIAR|C(ITC[C])DPNPDDPLVPEIAR	|1|2|1|||2|1	|1.22|0.92|0.72|||0.86|0.98	|NA|0.0|NA|||0.05657|NA	0.94	0.18385	7	5
P52732_1003	KIF11	KIF11_HUMAN Kinesin-like protein KIF11 OS=Homo sapiens OX=9606 GN=KIF11 PE=1 SV=2	|||C(ITC[C])SSIGGVPFFQHK|||C(ITC[C])SSIGGVPFFQHK|C(ITC[C])SSIGGVPFFQHK	|||1|||1|1	|||0.76|||1.03|1.03	|||NA|||NA|NA	0.94	0.15588	3	3
Q8WWH5_307	TRUB1	TRUB1_HUMAN Probable tRNA pseudouridine synthase 1 OS=Homo sapiens OX=9606 GN=TRUB1 PE=1 SV=1	||C(ITC[C])SSLFPAELALK||C(ITC[C])SSLFPAELALK|C(ITC[C])SSLFPAELALK|C(ITC[C])SSLFPAELALK|C(ITC[C])SSLFPAELALK	||2||1|1|2|3	||0.99||0.96|0.93|0.8|1.02	||0.05657||NA|NA|0.05657|0.11015	0.94	0.08515	9	5
P25205_446	MCM3	MCM3_HUMAN DNA replication licensing factor MCM3 OS=Homo sapiens OX=9606 GN=MCM3 PE=1 SV=3	C(ITC[C])SVLAAANPVYGR|C(ITC[C])SVLAAANPVYGR|C(ITC[C])SVLAAANPVYGR|C(ITC[C])SVLAAANPVYGR|C(ITC[C])SVLAAANPVYGR|C(ITC[C])SVLAAANPVYGR|C(ITC[C])SVLAAANPVYGR|C(ITC[C])SVLAAANPVYGR	5|3|6|7|4|1|1|1	1.17|0.91|0.855|0.89|0.99|1.12|0.71|0.87	0.08849|0.13279|0.13426|0.11631|0.08617|NA|NA|NA	0.93938	0.14939	28	8
P19367_628	HK1	HXK1_HUMAN Hexokinase-1 OS=Homo sapiens OX=9606 GN=HK1 PE=1 SV=3	C(ITC[C])VGHDVVTLLR|C(ITC[C])VGHDVVTLLR|C(ITC[C])VGHDVVTLLR||C(ITC[C])VGHDVVTLLR|||	1|1|2||1|||	0.81|0.75|1.115||1.08|||	NA|NA|0.10607||NA|||	0.93875	0.18549	5	4
P39023_336	RPL3	RL3_HUMAN 60S ribosomal protein L3 OS=Homo sapiens OX=9606 GN=RPL3 PE=1 SV=2	C(ITC[C])VVGTK|C(ITC[C])VVGTK|GC(ITC[C])VVGTK|GC(ITC[C])VVGTK C(ITC[C])VVGTK|GC(ITC[C])VVGTK C(ITC[C])VVGTK|GC(ITC[C])VVGTK C(ITC[C])VVGTK|GC(ITC[C])VVGTK C(ITC[C])VVGTK|GC(ITC[C])VVGTK C(ITC[C])VVGTK	1|2|1|3|6|4|6|5	0.8|0.815|0.98|0.74|0.825|1.01|1.04|1.3	NA|0.03536|NA|0.56871|0.44626|0.29218|0.36104|0.24062	0.93875	0.18304	28	8
Q9NU22_2784	MDN1	MDN1_HUMAN Midasin OS=Homo sapiens OX=9606 GN=MDN1 PE=1 SV=2	||C(ITC[C])LGSQTGGFAGIK|C(ITC[C])LGSQTGGFAGIK||C(ITC[C])LGSQTGGFAGIK|C(ITC[C])LGSQTGGFAGIK|	||2|1||2|2|	||0.785|0.87||1.105|0.99|	||0.17678|NA||0.06364|0.11314|	0.9375	0.13979	7	4
Q9NVH0_284	EXD2	EXD2_HUMAN Exonuclease 3'-5' domain-containing protein 2 OS=Homo sapiens OX=9606 GN=EXD2 PE=1 SV=2	C(ITC[C])QGVVDIPFR|C(ITC[C])QGVVDIPFR|C(ITC[C])QGVVDIPFR|C(ITC[C])QGVVDIPFR|C(ITC[C])QGVVDIPFR|C(ITC[C])QGVVDIPFR|C(ITC[C])QGVVDIPFR|C(ITC[C])QGVVDIPFR	2|3|4|1|1|1|3|1	1.03|1.38|0.725|0.57|0.87|0.98|0.7|1.24	0.01414|0.32393|0.14353|NA|NA|NA|0.02309|NA	0.93688	0.27745	16	8
Q9NYP9_112	MIS18A	MS18A_HUMAN Protein Mis18-alpha OS=Homo sapiens OX=9606 GN=MIS18A PE=1 SV=1	|C(ITC[C])VSCNVSVDK|C(ITC[C])VSCNVSVDK|C(ITC[C])VSCNVSVDK||||	|1|1|1||||	|1.21|0.84|0.76||||	|NA|NA|NA||||	0.93667	0.24007	3	3
P00492_23	HPRT1	HPRT_HUMAN Hypoxanthine-guanine phosphoribosyltransferase OS=Homo sapiens OX=9606 GN=HPRT1 PE=1 SV=2	C(ITC[C])IPNHYAEDLER|C(ITC[C])IPNHYAEDLER||C(ITC[C])IPNHYAEDLER||||	2|2||1||||	0.86|0.76||1.19||||	0.24042|0.12728||NA||||	0.93667	0.22502	5	3
O00139_537	KIF2A	KIF2A_HUMAN Kinesin-like protein KIF2A OS=Homo sapiens OX=9606 GN=KIF2A PE=1 SV=3	||C(ITC[C])ENTLNTLR||C(ITC[C])ENTLNTLR|C(ITC[C])ENTLNTLR||	||1||2|1||	||0.8||0.85|1.16||	||NA||0.0|NA||	0.93667	0.19502	4	3
P07814_92	EPRS1	SYEP_HUMAN Bifunctional glutamate/proline--tRNA ligase OS=Homo sapiens OX=9606 GN=EPRS1 PE=1 SV=5	C(ITC[C])DSFTSTINELNHCLSLR|C(ITC[C])DSFTSTINELNHCLSLR||||||C(ITC[C])DSFTSTINELNHCLSLR	1|1||||||2	0.92|0.95||||||0.94	NA|NA||||||0.0	0.93667	0.01528	4	3
P49321_708	NASP	NASP_HUMAN Nuclear autoantigenic sperm protein OS=Homo sapiens OX=9606 GN=NASP PE=1 SV=2	C(ITC[C])VTDISHLVR|C(ITC[C])VTDISHLVR|C(ITC[C])VTDISHLVR|C(ITC[C])VTDISHLVR|C(ITC[C])VTDISHLVR|C(ITC[C])VTDISHLVR|C(ITC[C])VTDISHLVR|C(ITC[C])VTDISHLVR	4|5|7|6|1|8|7|6	1.0|1.03|0.95|0.98|0.87|0.865|0.91|0.88	0.04435|0.09476|0.13563|0.24419|NA|0.0744|0.43753|0.23284	0.93563	0.06355	44	8
P48735_113	IDH2	IDHP_HUMAN Isocitrate dehydrogenase [NADP], mitochondrial OS=Homo sapiens OX=9606 GN=IDH2 PE=1 SV=2	C(ITC[C])ATITPDEAR|C(ITC[C])ATITPDEAR|C(ITC[C])ATITPDEAR||C(ITC[C])ATITPDEAR|||	1|1|2||1|||	0.69|1.26|1.145||0.64|||	NA|NA|0.20506||NA|||	0.93375	0.31452	5	4
Q9H1I8_464	ASCC2	ASCC2_HUMAN Activating signal cointegrator 1 complex subunit 2 OS=Homo sapiens OX=9606 GN=ASCC2 PE=1 SV=3	||C(ITC[C])GVELDSLISQVK||C(ITC[C])GVELDSLISQVK|||C(ITC[C])GVELDSLISQVK	||1||1|||1	||0.75||1.19|||0.86	||NA||NA|||NA	0.93333	0.22898	3	3
Q9UKD2_33	MRTO4	MRT4_HUMAN mRNA turnover protein 4 homolog OS=Homo sapiens OX=9606 GN=MRTO4 PE=1 SV=2	C(ITC[C])VDTYK|C(ITC[C])VDTYK||C(ITC[C])VDTYK||||	2|2||2||||	1.125|0.905||0.77||||	0.0495|0.14849||0.05657||||	0.93333	0.17919	6	3
O75794_289	CDC123	CD123_HUMAN Cell division cycle protein 123 homolog OS=Homo sapiens OX=9606 GN=CDC123 PE=1 SV=1	|C(ITC[C])TNSEVTVQPSPYLSYR||||C(ITC[C])TNSEVTVQPSPYLSYR|C(ITC[C])TNSEVTVQPSPYLSYR|	|1||||1|2|	|1.01||||0.94|0.85|	|NA||||NA|0.0|	0.93333	0.08021	4	3
Q7Z5K2_675	WAPL	WAPL_HUMAN Wings apart-like protein homolog OS=Homo sapiens OX=9606 GN=WAPL PE=1 SV=1	C(ITC[C])LSVISLATK|C(ITC[C])LSVISLATK|C(ITC[C])LSVISLATK|C(ITC[C])LSVISLATK|C(ITC[C])LSVISLATK|C(ITC[C])LSVISLATK|C(ITC[C])LSVISLATK|C(ITC[C])LSVISLATK	2|2|4|3|2|1|3|2	1.325|1.175|0.79|0.63|0.98|1.07|0.82|0.675	0.00707|0.00707|0.07719|0.02309|0.0|NA|0.01155|0.03536	0.93313	0.24634	19	8
Q96I24_366	FUBP3	FUBP3_HUMAN Far upstream element-binding protein 3 OS=Homo sapiens OX=9606 GN=FUBP3 PE=1 SV=2	C(ITC[C])GLVIGK|C(ITC[C])GLVIGK|C(ITC[C])GLVIGK|C(ITC[C])GLVIGK|C(ITC[C])GLVIGK|C(ITC[C])GLVIGK|C(ITC[C])GLVIGK|C(ITC[C])GLVIGK	3|7|2|1|1|2|2|3	0.45|0.55|1.055|1.25|0.84|1.13|1.04|1.15	0.03464|0.11858|0.00707|NA|NA|0.16971|0.05657|0.14434	0.93312	0.2931	21	8
Q9H3U1_118	UNC45A	UN45A_HUMAN Protein unc-45 homolog A OS=Homo sapiens OX=9606 GN=UNC45A PE=1 SV=1	C(ITC[C])VSLEPK|C(ITC[C])VSLEPK|C(ITC[C])VSLEPK|C(ITC[C])VSLEPK|C(ITC[C])VSLEPK|C(ITC[C])VSLEPK|C(ITC[C])VSLEPK|C(ITC[C])VSLEPK	1|3|3|3|1|1|2|2	0.93|0.95|0.89|0.98|0.87|0.85|0.91|1.085	NA|0.15716|0.07638|0.20785|NA|NA|0.09899|0.12021	0.93312	0.0745	16	8
Q1KMD3_602	HNRNPUL2	HNRL2_HUMAN Heterogeneous nuclear ribonucleoprotein U-like protein 2 OS=Homo sapiens OX=9606 GN=HNRNPUL2 PE=1 SV=1	C(ITC[C])DYMDEVTYGELEKEEAQPIVTK|C(ITC[C])DYMDEVTYGELEKEEAQPIVTK|C(ITC[C])DYMDEVTYGELEKEEAQPIVTK|C(ITC[C])DYMDEVTYGELEKEEAQPIVTK||||C(ITC[C])DYMDEVTYGELEKEEAQPIVTK	2|3|2|1||||1	0.86|0.79|0.815|0.98||||1.22	0.04243|0.05774|0.00707|NA||||NA	0.933	0.17627	9	5
Q99873_33	PRMT1	ANM1_HUMAN Protein arginine N-methyltransferase 1 OS=Homo sapiens OX=9606 GN=PRMT1 PE=1 SV=3	||C(ITC[C])GQAESSEKPNAEDMTSK||C(ITC[C])GQAESSEKPNAEDMTSK|C(ITC[C])GQAESSEKPNAEDMTSK||C(ITC[C])GQAESSEKPNAEDMTSK	||1||2|1||1	||0.81||0.98|0.97||0.97	||NA||0.0|NA||NA	0.9325	0.0818	5	4
Q92499_139	DDX1	DDX1_HUMAN ATP-dependent RNA helicase DDX1 OS=Homo sapiens OX=9606 GN=DDX1 PE=1 SV=2	||||C(ITC[C])HDQGLCR|C(ITC[C])HDQGLCR|C(ITC[C])HDQGLCR|C(ITC[C])HDQGLCR	||||1|1|2|1	||||1.04|0.87|0.94|0.88	||||NA|NA|0.0|NA	0.9325	0.07805	5	4
P60842_134	EIF4A1	IF4A1_HUMAN Eukaryotic initiation factor 4A-I OS=Homo sapiens OX=9606 GN=EIF4A1 PE=1 SV=1	VVMALGDYMGASCHAC(ITC[C])IGGTNVR|VVMALGDYMGASCHAC(ITC[C])IGGTNVR|VVMALGDYMGASCHAC(ITC[C])IGGTNVR|VVMALGDYMGASCHAC(ITC[C])IGGTNVR|VVMALGDYMGASCHAC(ITC[C])IGGTNVR|VVMALGDYMGASCHAC(ITC[C])IGGTNVR|C(ITC[C])IGGTNVR VVMALGDYMGASCHAC(ITC[C])IGGTNVR|VVMALGDYMGASCHAC(ITC[C])IGGTNVR	5|4|7|3|2|4|4|5	0.84|1.015|0.89|0.84|0.91|0.98|0.965|1.02	0.1571|0.17328|0.07091|0.12897|0.01414|0.14033|0.09032|0.143	0.9325	0.0729	34	8
Q9Y2U8_838	LEMD3	MAN1_HUMAN Inner nuclear membrane protein Man1 OS=Homo sapiens OX=9606 GN=LEMD3 PE=1 SV=2	C(ITC[C])LSPEYAGK|C(ITC[C])LSPEYAGK|C(ITC[C])LSPEYAGK|C(ITC[C])LSPEYAGK|C(ITC[C])LSPEYAGK||C(ITC[C])LSPEYAGK|C(ITC[C])LSPEYAGK	2|1|1|1|2||1|1	1.215|1.2|0.75|0.63|1.03||0.88|0.82	0.2192|NA|NA|NA|0.02828||NA|NA	0.93214	0.22401	9	7
Q9Y5L0_125	TNPO3	TNPO3_HUMAN Transportin-3 OS=Homo sapiens OX=9606 GN=TNPO3 PE=1 SV=3	C(ITC[C])VQTLVEK|C(ITC[C])VQTLVEK|C(ITC[C])VQTLVEK|C(ITC[C])VQTLVEK|C(ITC[C])VQTLVEK|||C(ITC[C])VQTLVEK	1|1|1|1|2|||1	1.07|1.33|0.71|0.74|1.07|||0.67	NA|NA|NA|NA|0.01414|||NA	0.93167	0.26506	7	6
Q03701_282	CEBPZ	CEBPZ_HUMAN CCAAT/enhancer-binding protein zeta OS=Homo sapiens OX=9606 GN=CEBPZ PE=1 SV=3	C(ITC[C])LMALDTFK||C(ITC[C])LMALDTFK|C(ITC[C])LMALDTFK|C(ITC[C])LMALDTFK|C(ITC[C])LMALDTFK||C(ITC[C])LMALDTFK	1||1|1|1|2||2	0.86||0.81|0.84|0.91|1.165||1.005	NA||NA|NA|NA|0.23335||0.33234	0.93167	0.13314	8	6
O15355_13	PPM1G	PPM1G_HUMAN Protein phosphatase 1G OS=Homo sapiens OX=9606 GN=PPM1G PE=1 SV=1	C(ITC[C])SGDGVGAPR|C(ITC[C])SGDGVGAPR|C(ITC[C])SGDGVGAPR|C(ITC[C])SGDGVGAPR|C(ITC[C])SGDGVGAPR|C(ITC[C])SGDGVGAPR|C(ITC[C])SGDGVGAPR|	3|4|2|2|2|1|1|	0.86|0.915|0.98|0.93|0.715|0.93|1.19|	0.02887|0.05354|0.09899|0.0|0.27577|NA|NA|	0.93143	0.14226	15	7
P46013_773	MKI67	KI67_HUMAN Proliferation marker protein Ki-67 OS=Homo sapiens OX=9606 GN=MKI67 PE=1 SV=2	|C(ITC[C])HIAISNSENLLGK|C(ITC[C])HIAISNSENLLGK|C(ITC[C])HIAISNSENLLGK|C(ITC[C])HIAISNSENLLGK|C(ITC[C])HIAISNSENLLGK|C(ITC[C])HIAISNSENLLGK|C(ITC[C])HIAISNSENLLGK	|1|1|1|5|1|2|3	|0.99|1.02|0.85|1.1|0.88|0.88|0.8	|NA|NA|NA|0.13115|NA|0.18385|0.53694	0.93143	0.10715	14	7
Q99986_220	VRK1	VRK1_HUMAN Serine/threonine-protein kinase VRK1 OS=Homo sapiens OX=9606 GN=VRK1 PE=1 SV=1	C(ITC[C])HDGTIEFTSIDAHNGVAPSR||C(ITC[C])HDGTIEFTSIDAHNGVAPSR||C(ITC[C])HDGTIEFTSIDAHNGVAPSR|||C(ITC[C])HDGTIEFTSIDAHNGVAPSR	2||1||1|||1	0.535||1.35||0.75|||1.09	0.00707||NA||NA|||NA	0.93125	0.36075	5	4
Q969X6_21	UTP4	UTP4_HUMAN U3 small nucleolar RNA-associated protein 4 homolog OS=Homo sapiens OX=9606 GN=UTP4 PE=1 SV=1	||C(ITC[C])VAYNNQSNR|C(ITC[C])VAYNNQSNR|C(ITC[C])VAYNNQSNR|||C(ITC[C])VAYNNQSNR	||3|1|2|||1	||0.88|0.82|1.255|||0.77	||0.10693|NA|0.00707|||NA	0.93125	0.22047	7	4
P04899_112	GNAI2	GNAI2_HUMAN Guanine nucleotide-binding protein G(i) subunit alpha-2 OS=Homo sapiens OX=9606 GN=GNAI2 PE=1 SV=3	|C(ITC[C])TAEEQGVLPDDLSGVIR|C(ITC[C])TAEEQGVLPDDLSGVIR|C(ITC[C])TAEEQGVLPDDLSGVIR|||C(ITC[C])TAEEQGVLPDDLSGVIR|	|3|2|2|||1|	|0.86|0.8|0.935|||1.13|	|0.0|0.15556|0.13435|||NA|	0.93125	0.14355	8	4
Q96GQ7_321	DDX27	DDX27_HUMAN Probable ATP-dependent RNA helicase DDX27 OS=Homo sapiens OX=9606 GN=DDX27 PE=1 SV=2	C(ITC[C])LAVGGLDVK|C(ITC[C])LAVGGLDVK QLAQFCNITTC(ITC[C])LAVGGLDVK|C(ITC[C])LAVGGLDVK|C(ITC[C])LAVGGLDVK|C(ITC[C])LAVGGLDVK|C(ITC[C])LAVGGLDVK|C(ITC[C])LAVGGLDVK|C(ITC[C])LAVGGLDVK	1|3|2|4|1|1|2|2	0.46|0.51|1.38|1.075|0.96|1.18|1.045|0.835	NA|0.15144|0.0|0.03317|NA|NA|0.10607|0.2192	0.93062	0.31769	16	8
Q1KMD3_308	HNRNPUL2	HNRL2_HUMAN Heterogeneous nuclear ribonucleoprotein U-like protein 2 OS=Homo sapiens OX=9606 GN=HNRNPUL2 PE=1 SV=1	|C(ITC[C])TEVSLLR|||C(ITC[C])TEVSLLR|||C(ITC[C])TEVSLLR	|1|||1|||1	|0.62|||1.07|||1.1	|NA|||NA|||NA	0.93	0.26889	3	3
P60900_154	PSMA6	PSA6_HUMAN Proteasome subunit alpha type-6 OS=Homo sapiens OX=9606 GN=PSMA6 PE=1 SV=1	C(ITC[C])DPAGYYCGFK||C(ITC[C])DPAGYYCGFK|C(ITC[C])DPAGYYCGFK||||	1||2|1||||	1.24||0.78|0.77||||	NA||0.01414|NA||||	0.93	0.26851	4	3
Q14008_343	CKAP5	CKAP5_HUMAN Cytoskeleton-associated protein 5 OS=Homo sapiens OX=9606 GN=CKAP5 PE=1 SV=3	|C(ITC[C])LTGLAVGLR|C(ITC[C])LTGLAVGLR|C(ITC[C])LTGLAVGLR|C(ITC[C])LTGLAVGLR|C(ITC[C])LTGLAVGLR|C(ITC[C])LTGLAVGLR|C(ITC[C])LTGLAVGLR	|1|1|2|2|3|3|1	|1.3|0.85|0.75|0.84|0.94|1.11|0.72	|NA|NA|0.01414|0.0|0.04359|0.14434|NA	0.93	0.20833	13	7
Q69YN2_160	CWF19L1	C19L1_HUMAN CWF19-like protein 1 OS=Homo sapiens OX=9606 GN=CWF19L1 PE=1 SV=2	C(ITC[C])VGNFGNSSGEVDTK|C(ITC[C])VGNFGNSSGEVDTK|C(ITC[C])VGNFGNSSGEVDTK|C(ITC[C])VGNFGNSSGEVDTK|C(ITC[C])VGNFGNSSGEVDTK|C(ITC[C])VGNFGNSSGEVDTK|C(ITC[C])VGNFGNSSGEVDTK|	1|2|2|2|1|1|1|	1.05|1.0|0.87|1.01|0.87|1.01|0.7|	NA|0.02828|0.02828|0.0|NA|NA|NA|	0.93	0.12396	10	7
P05386_61	RPLP1	RLA1_HUMAN 60S acidic ribosomal protein P1 OS=Homo sapiens OX=9606 GN=RPLP1 PE=1 SV=1	C(ITC[C])NVGAGGPAPAAGAAPAGGPAPSTAAAPAEEK|C(ITC[C])NVGAGGPAPAAGAAPAGGPAPSTAAAPAEEK|C(ITC[C])NVGAGGPAPAAGAAPAGGPAPSTAAAPAEEK|C(ITC[C])NVGAGGPAPAAGAAPAGGPAPSTAAAPAEEK|C(ITC[C])NVGAGGPAPAAGAAPAGGPAPSTAAAPAEEK|C(ITC[C])NVGAGGPAPAAGAAPAGGPAPSTAAAPAEEK||	4|5|1|1|3|2||	0.86|0.86|0.91|1.06|0.82|1.07||	0.07365|0.04278|NA|NA|0.13317|0.15556||	0.93	0.10844	16	6
P52630_74	STAT2	STAT2_HUMAN Signal transducer and activator of transcription 2 OS=Homo sapiens OX=9606 GN=STAT2 PE=1 SV=1	||C(ITC[C])SQDPESLLLQHNLR||C(ITC[C])SQDPESLLLQHNLR|||C(ITC[C])SQDPESLLLQHNLR	||1||1|||1	||0.83||0.95|||1.01	||NA||NA|||NA	0.93	0.09165	3	3
P21333_2543	FLNA	FLNA_HUMAN Filamin-A OS=Homo sapiens OX=9606 GN=FLNA PE=1 SV=4	C(ITC[C])APQHGAPGPGPADASK|C(ITC[C])APQHGAPGPGPADASK|C(ITC[C])APQHGAPGPGPADASK|C(ITC[C])APQHGAPGPGPADASK|C(ITC[C])APQHGAPGPGPADASK|C(ITC[C])APQHGAPGPGPADASK|C(ITC[C])APQHGAPGPGPADASK|C(ITC[C])APQHGAPGPGPADASK	5|3|1|1|3|7|4|4	0.87|0.78|0.91|0.97|0.94|0.97|0.995|1.0	0.12398|0.05686|NA|NA|0.09539|0.07432|0.09256|0.08287	0.92938	0.07457	28	8
Q9NRZ9_205	HELLS	HELLS_HUMAN Lymphoid-specific helicase OS=Homo sapiens OX=9606 GN=HELLS PE=1 SV=1	C(ITC[C])NGQPVPFQQPK|C(ITC[C])NGQPVPFQQPK|C(ITC[C])NGQPVPFQQPK|C(ITC[C])NGQPVPFQQPK|C(ITC[C])NGQPVPFQQPK|C(ITC[C])NGQPVPFQQPK||	3|5|1|3|2|1||	1.22|1.25|0.67|0.71|0.725|1.0||	0.17578|0.12042|NA|0.10214|0.10607|NA||	0.92917	0.26436	15	6
Q5TC12_321	ATPAF1	ATPF1_HUMAN ATP synthase mitochondrial F1 complex assembly factor 1 OS=Homo sapiens OX=9606 GN=ATPAF1 PE=1 SV=1	C(ITC[C])AQNQNK|C(ITC[C])AQNQNK|C(ITC[C])AQNQNK|C(ITC[C])AQNQNK|C(ITC[C])AQNQNK|||C(ITC[C])AQNQNK	1|4|1|4|1|||1	0.65|0.71|1.09|1.105|0.83|||1.19	NA|0.0755|NA|0.05228|NA|||NA	0.92917	0.22831	12	6
O75533_796	SF3B1	SF3B1_HUMAN Splicing factor 3B subunit 1 OS=Homo sapiens OX=9606 GN=SF3B1 PE=1 SV=3	|||C(ITC[C])GTDGVEANYIK|C(ITC[C])GTDGVEANYIK|C(ITC[C])GTDGVEANYIK||C(ITC[C])GTDGVEANYIK	|||2|1|1||1	|||0.795|1.06|1.01||0.85	|||0.09192|NA|NA||NA	0.92875	0.12638	5	4
Q9H0C8_190	ILKAP	ILKAP_HUMAN Integrin-linked kinase-associated serine/threonine phosphatase 2C OS=Homo sapiens OX=9606 GN=ILKAP PE=1 SV=1	C(ITC[C])LLDTFK|C(ITC[C])LLDTFK|C(ITC[C])LLDTFK|C(ITC[C])LLDTFK|C(ITC[C])LLDTFK||C(ITC[C])LLDTFK|C(ITC[C])LLDTFK	2|3|6|5|1||6|1	1.22|1.32|0.74|0.75|0.86||0.85|0.76	0.0|0.06506|0.05715|0.0313|NA||0.08939|NA	0.92857	0.23975	24	7
O00567_384	NOP56	NOP56_HUMAN Nucleolar protein 56 OS=Homo sapiens OX=9606 GN=NOP56 PE=1 SV=4	C(ITC[C])FSEVPTSVFGEK|C(ITC[C])FSEVPTSVFGEK||C(ITC[C])FSEVPTSVFGEK|C(ITC[C])FSEVPTSVFGEK|C(ITC[C])FSEVPTSVFGEK|C(ITC[C])FSEVPTSVFGEK|	1|2||2|1|1|1|	1.11|1.35||0.63|1.02|0.78|0.68|	NA|0.05657||0.0|NA|NA|NA|	0.92833	0.27996	8	6
Q14004_80	CDK13	CDK13_HUMAN Cyclin-dependent kinase 13 OS=Homo sapiens OX=9606 GN=CDK13 PE=1 SV=2	|||||C(ITC[C])FSPGPPLEVK|C(ITC[C])FSPGPPLEVK|C(ITC[C])FSPGPPLEVK	|||||1|2|3	|||||1.09|0.935|0.76	|||||NA|0.02121|0.08327	0.92833	0.1651	6	3
Q8WTW3_72	COG1	COG1_HUMAN Conserved oligomeric Golgi complex subunit 1 OS=Homo sapiens OX=9606 GN=COG1 PE=1 SV=1	C(ITC[C])AVGLVDAVK|C(ITC[C])AVGLVDAVK|C(ITC[C])AVGLVDAVK|C(ITC[C])AVGLVDAVK|C(ITC[C])AVGLVDAVK|C(ITC[C])AVGLVDAVK|C(ITC[C])AVGLVDAVK|C(ITC[C])AVGLVDAVK	1|2|2|2|1|2|1|1	1.1|1.27|0.75|0.68|0.99|1.045|0.84|0.75	NA|0.0|0.02828|0.02828|NA|0.02121|NA|NA	0.92812	0.20588	12	8
Q15120_191	PDK3	PDK3_HUMAN [Pyruvate dehydrogenase (acetyl-transferring)] kinase isozyme 3, mitochondrial OS=Homo sapiens OX=9606 GN=PDK3 PE=1 SV=1	||C(ITC[C])NVADVVK||C(ITC[C])NVADVVK|C(ITC[C])NVADVVK|C(ITC[C])NVADVVK|C(ITC[C])NVADVVK	||2||1|1|1|1	||0.95||0.71|1.17|0.93|0.88	||0.04243||NA|NA|NA|NA	0.928	0.16498	6	5
O75569_291	PRKRA	PRKRA_HUMAN Interferon-inducible double-stranded RNA-dependent protein kinase activator A OS=Homo sapiens OX=9606 GN=PRKRA PE=1 SV=1	||C(ITC[C])GNAQSDAAHNALQYLK|C(ITC[C])GNAQSDAAHNALQYLK|C(ITC[C])GNAQSDAAHNALQYLK||C(ITC[C])GNAQSDAAHNALQYLK|	||1|2|1||1|	||1.0|0.76|0.89||1.06|	||NA|0.11314|NA||NA|	0.9275	0.132	5	4
P15735_294	PHKG2	PHKG2_HUMAN Phosphorylase b kinase gamma catalytic chain, liver/testis isoform OS=Homo sapiens OX=9606 GN=PHKG2 PE=1 SV=1	C(ITC[C])EGSQPWNLTPR|C(ITC[C])EGSQPWNLTPR|C(ITC[C])EGSQPWNLTPR|C(ITC[C])EGSQPWNLTPR|C(ITC[C])EGSQPWNLTPR||C(ITC[C])EGSQPWNLTPR|	1|2|3|2|1||2|	0.82|0.795|1.02|0.97|1.01||0.95|	NA|0.03536|0.04583|0.09899|NA||0.0|	0.9275	0.09673	11	6
Q9H8Y8_192	GORASP2	GORS2_HUMAN Golgi reassembly-stacking protein 2 OS=Homo sapiens OX=9606 GN=GORASP2 PE=1 SV=3	||C(ITC[C])GIGYGYLHR|C(ITC[C])GIGYGYLHR||||C(ITC[C])GIGYGYLHR	||1|1||||1	||1.04|1.05||||0.69	||NA|NA||||NA	0.92667	0.20502	3	3
Q92621_1855	NUP205	NU205_HUMAN Nuclear pore complex protein Nup205 OS=Homo sapiens OX=9606 GN=NUP205 PE=1 SV=3	|||||C(ITC[C])QSVMPAGVDK|C(ITC[C])QSVMPAGVDK|C(ITC[C])QSVMPAGVDK	|||||1|1|1	|||||0.96|1.01|0.81	|||||NA|NA|NA	0.92667	0.10408	3	3
P67870_140	CSNK2B	CSK2B_HUMAN Casein kinase II subunit beta OS=Homo sapiens OX=9606 GN=CSNK2B PE=1 SV=1	C(ITC[C])MDVYTPK|C(ITC[C])MDVYTPK|C(ITC[C])MDVYTPK|C(ITC[C])MDVYTPK||||	2|4|2|6||||	1.0|1.145|0.77|0.79||||	0.01414|0.05354|0.02828|0.08542||||	0.92625	0.17914	14	4
Q8NDB6_131	FAM156A	FA156_HUMAN Protein FAM156A/FAM156B OS=Homo sapiens OX=9606 GN=FAM156A PE=1 SV=1	YC(ITC[C])QSHR|YC(ITC[C])QSHR||YC(ITC[C])QSHR|YC(ITC[C])QSHR|||	2|1||1|1|||	0.765|0.84||1.11|0.99|||	0.00707|NA||NA|NA|||	0.92625	0.15413	5	4
Q15118_223	PDK1	PDK1_HUMAN [Pyruvate dehydrogenase (acetyl-transferring)] kinase isozyme 1, mitochondrial OS=Homo sapiens OX=9606 GN=PDK1 PE=1 SV=1	C(ITC[C])NVLEVIK||C(ITC[C])NVLEVIK|C(ITC[C])NVLEVIK||C(ITC[C])NVLEVIK|C(ITC[C])NVLEVIK|	1||3|2||2|1|	1.17||0.65|0.74||0.92|1.15|	NA||0.02517|0.07071||0.07071|NA|	0.926	0.2348	9	5
Q96I24_125	FUBP3	FUBP3_HUMAN Far upstream element-binding protein 3 OS=Homo sapiens OX=9606 GN=FUBP3 PE=1 SV=2	C(ITC[C])VLTGTPESIEQAK|C(ITC[C])VLTGTPESIEQAK|C(ITC[C])VLTGTPESIEQAK||C(ITC[C])VLTGTPESIEQAK|C(ITC[C])VLTGTPESIEQAK||	3|1|2||1|1||	1.06|0.85|1.03||1.02|0.67||	0.0|NA|0.18385||NA|NA||	0.926	0.16502	8	5
P33992_207	MCM5	MCM5_HUMAN DNA replication licensing factor MCM5 OS=Homo sapiens OX=9606 GN=MCM5 PE=1 SV=5	C(ITC[C])PLDPYFIMPDK|C(ITC[C])PLDPYFIMPDK|C(ITC[C])PLDPYFIMPDK|C(ITC[C])PLDPYFIMPDK|C(ITC[C])PLDPYFIMPDK|C(ITC[C])PLDPYFIMPDK|C(ITC[C])PLDPYFIMPDK|C(ITC[C])PLDPYFIMPDK	3|5|1|5|2|2|2|3	1.09|1.21|0.74|0.76|0.975|0.96|0.85|0.82	0.04|0.12062|NA|0.11883|0.00707|0.09899|0.04243|0.05508	0.92562	0.16487	23	8
P23246_431	SFPQ	SFPQ_HUMAN Splicing factor, proline- and glutamine-rich OS=Homo sapiens OX=9606 GN=SFPQ PE=1 SV=2	C(ITC[C])SEGVFLLTTTPR|C(ITC[C])SEGVFLLTTTPR|C(ITC[C])SEGVFLLTTTPR|C(ITC[C])SEGVFLLTTTPR|C(ITC[C])SEGVFLLTTTPR|C(ITC[C])SEGVFLLTTTPR|C(ITC[C])SEGVFLLTTTPR|C(ITC[C])SEGVFLLTTTPR	11|12|7|8|9|6|5|7	0.69|0.755|1.01|1.005|1.01|0.61|1.2|1.12	0.20266|0.23133|0.08071|0.07483|0.30917|0.51282|0.03347|0.12177	0.925	0.21309	65	8
Q9BUH6_180	PAXX	PAXX_HUMAN Protein PAXX OS=Homo sapiens OX=9606 GN=PAXX PE=1 SV=2	C(ITC[C])PGESLINPGFK|C(ITC[C])PGESLINPGFK|C(ITC[C])PGESLINPGFK|C(ITC[C])PGESLINPGFK||C(ITC[C])PGESLINPGFK|C(ITC[C])PGESLINPGFK|C(ITC[C])PGESLINPGFK	1|1|6|4||3|2|3	0.85|0.97|0.935|1.015||0.77|1.035|0.9	NA|NA|0.06058|1.51203||0.01155|0.03536|0.03606	0.925	0.09363	20	7
P60709_17	ACTB	ACTB_HUMAN Actin, cytoplasmic 1 OS=Homo sapiens OX=9606 GN=ACTB PE=1 SV=1	||||VVDNGSGMC(ITC[C])K VVDNGSGMC(ITC[C])KAGFAGDDAPR|VVDNGSGMC(ITC[C])K VVDNGSGMC(ITC[C])KAGFAGDDAPR|VVDNGSGMC(ITC[C])K VVDNGSGMC(ITC[C])KAGFAGDDAPR|VVDNGSGMC(ITC[C])K VVDNGSGMC(ITC[C])KAGFAGDDAPR	||||7|5|6|11	||||0.88|0.83|0.96|1.03	||||0.05815|0.35402|1.5057|0.05186	0.925	0.08813	29	4
O15382_342	BCAT2	BCAT2_HUMAN Branched-chain-amino-acid aminotransferase, mitochondrial OS=Homo sapiens OX=9606 GN=BCAT2 PE=1 SV=2	C(ITC[C])QVCPVHR|C(ITC[C])QVCPVHR EVFGSGTAC(ITC[C])QVCPVHR|C(ITC[C])QVCPVHR|C(ITC[C])QVCPVHR|C(ITC[C])QVCPVHR|C(ITC[C])QVCPVHR|C(ITC[C])QVCPVHR|C(ITC[C])QVCPVHR	4|8|4|2|2|3|2|5	1.47|1.255|0.87|0.57|0.78|0.98|0.66|0.81	0.02062|0.29115|0.13961|0.0|0.19799|0.05033|0.0|0.11145	0.92438	0.30295	30	8
Q16658_260	FSCN1	FSCN1_HUMAN Fascin OS=Homo sapiens OX=9606 GN=FSCN1 PE=1 SV=3	C(ITC[C])AQVVLQAANER|||C(ITC[C])AQVVLQAANER|C(ITC[C])AQVVLQAANER|||	1|||1|1|||	0.51|||1.16|1.1|||	NA|||NA|NA|||	0.92333	0.35921	3	3
Q9UBQ7_216	GRHPR	GRHPR_HUMAN Glyoxylate reductase/hydroxypyruvate reductase OS=Homo sapiens OX=9606 GN=GRHPR PE=1 SV=1	|||C(ITC[C])SLTPATEGLCNK|||C(ITC[C])SLTPATEGLCNK|C(ITC[C])SLTPATEGLCNK	|||2|||1|1	|||0.65|||0.94|1.18	|||0.19799|||NA|NA	0.92333	0.26539	4	3
Q8N7H5_36	PAF1	PAF1_HUMAN RNA polymerase II-associated factor 1 homolog OS=Homo sapiens OX=9606 GN=PAF1 PE=1 SV=2	||C(ITC[C])NSLPDIPFDPK||C(ITC[C])NSLPDIPFDPK|C(ITC[C])NSLPDIPFDPK||	||2||1|1||	||0.72||0.91|1.14||	||0.0||NA|NA||	0.92333	0.21032	4	3
P52789_794	HK2	HXK2_HUMAN Hexokinase-2 OS=Homo sapiens OX=9606 GN=HK2 PE=1 SV=2	|||C(ITC[C])LALLQVR|C(ITC[C])LALLQVR||C(ITC[C])LALLQVR|	|||1|1||1|	|||0.99|1.02||0.76|	|||NA|NA||NA|	0.92333	0.14224	3	3
Q9Y3I0_485	RTCB	RTCB_HUMAN RNA-splicing ligase RtcB homolog OS=Homo sapiens OX=9606 GN=RTCB PE=1 SV=1	C(ITC[C])HDAGISK||C(ITC[C])HDAGISK|C(ITC[C])HDAGISK||||	1||1|1||||	1.07||0.79|0.91||||	NA||NA|NA||||	0.92333	0.14048	3	3
Q9Y324_154	FCF1	FCF1_HUMAN rRNA-processing protein FCF1 homolog OS=Homo sapiens OX=9606 GN=FCF1 PE=1 SV=1	C(ITC[C])YIVATVDR|||C(ITC[C])YIVATVDR|||C(ITC[C])YIVATVDR|	1|||1|||1|	0.97|||0.96|||0.84|	NA|||NA|||NA|	0.92333	0.07234	3	3
Q9BUK6_511	MSTO1	MSTO1_HUMAN Protein misato homolog 1 OS=Homo sapiens OX=9606 GN=MSTO1 PE=1 SV=1	||||C(ITC[C])SSSSLHQTLEALAR||C(ITC[C])SSSSLHQTLEALAR|C(ITC[C])SSSSLHQTLEALAR	||||1||1|1	||||0.91||0.93|0.93	||||NA||NA|NA	0.92333	0.01155	3	3
Q13098_251	GPS1	CSN1_HUMAN COP9 signalosome complex subunit 1 OS=Homo sapiens OX=9606 GN=GPS1 PE=1 SV=4	C(ITC[C])AAGLAELAAR|C(ITC[C])AAGLAELAAR|C(ITC[C])AAGLAELAAR|C(ITC[C])AAGLAELAAR|C(ITC[C])AAGLAELAAR|C(ITC[C])AAGLAELAAR|C(ITC[C])AAGLAELAAR|C(ITC[C])AAGLAELAAR	3|4|6|4|3|3|4|4	0.73|0.7|1.025|1.06|1.02|0.93|0.965|0.95	0.03215|0.08221|0.02944|0.02708|0.01732|0.09018|0.02449|0.01	0.9225	0.13528	31	8
P53384_256	NUBP1	NUBP1_HUMAN Cytosolic Fe-S cluster assembly factor NUBP1 OS=Homo sapiens OX=9606 GN=NUBP1 PE=1 SV=2	||||C(ITC[C])QDLEVPLLGR|C(ITC[C])QDLEVPLLGR|C(ITC[C])QDLEVPLLGR|C(ITC[C])QDLEVPLLGR	||||2|3|3|4	||||0.985|0.96|0.86|0.885	||||0.00707|0.1253|0.01732|0.14009	0.9225	0.05951	12	4
P35579_931	MYH9	MYH9_HUMAN Myosin-9 OS=Homo sapiens OX=9606 GN=MYH9 PE=1 SV=4	C(ITC[C])QHLQAEK|C(ITC[C])QHLQAEK||C(ITC[C])QHLQAEK||C(ITC[C])QHLQAEK||C(ITC[C])QHLQAEK	1|1||2||1||2	0.89|1.12||0.85||0.66||1.09	NA|NA||0.01414||NA||0.0	0.922	0.1886	7	5
Q9H0L4_150	CSTF2T	CSTFT_HUMAN Cleavage stimulation factor subunit 2 tau variant OS=Homo sapiens OX=9606 GN=CSTF2T PE=1 SV=1	C(ITC[C])VQNSHQEAR||C(ITC[C])VQNSHQEAR|C(ITC[C])VQNSHQEAR|C(ITC[C])VQNSHQEAR||C(ITC[C])VQNSHQEAR|	1||1|1|1||1|	0.89||0.97|0.99|0.8||0.96|	NA||NA|NA|NA||NA|	0.922	0.07791	5	5
Q9NZ32_37	ACTR10	ARP10_HUMAN Actin-related protein 10 OS=Homo sapiens OX=9606 GN=ACTR10 PE=1 SV=1	C(ITC[C])IIPSVIK||C(ITC[C])IIPSVIK|C(ITC[C])IIPSVIK||C(ITC[C])IIPSVIK||	2||2|2||1||	0.485||1.19|1.04||0.97||	0.16263||0.02828|0.15556||NA||	0.92125	0.30497	7	4
O75369_660	FLNB	FLNB_HUMAN Filamin-B OS=Homo sapiens OX=9606 GN=FLNB PE=1 SV=2	||C(ITC[C])IVNNLAEFTVDPK|C(ITC[C])IVNNLAEFTVDPK||C(ITC[C])IVNNLAEFTVDPK|C(ITC[C])IVNNLAEFTVDPK|	||1|2||1|1|	||1.21|0.965||0.72|0.79|	||NA|0.33234||NA|NA|	0.92125	0.21834	5	4
Q9NY93_286	DDX56	DDX56_HUMAN Probable ATP-dependent RNA helicase DDX56 OS=Homo sapiens OX=9606 GN=DDX56 PE=1 SV=1	||C(ITC[C])VLNGELPLR|C(ITC[C])VLNGELPLR||C(ITC[C])VLNGELPLR|C(ITC[C])VLNGELPLR|C(ITC[C])VLNGELPLR	||2|1||1|2|2	||0.82|0.78||0.82|0.89|1.295	||0.05657|NA||NA|0.24042|0.28991	0.921	0.21279	8	5
Q9NV35_28	NUDT15	NUD15_HUMAN Nucleotide triphosphate diphosphatase NUDT15 OS=Homo sapiens OX=9606 GN=NUDT15 PE=1 SV=1	C(ITC[C])VLLGK|C(ITC[C])VLLGK|C(ITC[C])VLLGK|C(ITC[C])VLLGK|C(ITC[C])VLLGK|C(ITC[C])VLLGK|C(ITC[C])VLLGK|C(ITC[C])VLLGK	2|5|1|2|1|1|1|1	1.49|1.31|0.73|0.7|0.93|0.56|0.69|0.95	0.19799|0.0705|NA|0.07071|NA|NA|NA|NA	0.92	0.32623	14	8
P14868_349	DARS1	SYDC_HUMAN Aspartate--tRNA ligase, cytoplasmic OS=Homo sapiens OX=9606 GN=DARS1 PE=1 SV=2	|C(ITC[C])EALAMLR|||C(ITC[C])EALAMLR|C(ITC[C])EALAMLR|C(ITC[C])EALAMLR|	|1|||1|1|1|	|0.51|||1.02|0.93|1.22|	|NA|||NA|NA|NA|	0.92	0.299	4	4
O14654_1065	IRS4	IRS4_HUMAN Insulin receptor substrate 4 OS=Homo sapiens OX=9606 GN=IRS4 PE=1 SV=1	C(ITC[C])SEPPPVAR|C(ITC[C])SEPPPVAR|C(ITC[C])SEPPPVAR|C(ITC[C])SEPPPVAR|C(ITC[C])SEPPPVAR|C(ITC[C])SEPPPVAR|C(ITC[C])SEPPPVAR|C(ITC[C])SEPPPVAR	14|11|8|9|8|8|4|2	1.34|1.3|0.625|0.61|0.925|0.94|0.82|0.8	0.18681|0.3123|0.02866|0.03833|0.06927|0.12933|0.015|0.05657	0.92	0.27484	64	8
P52789_628	HK2	HXK2_HUMAN Hexokinase-2 OS=Homo sapiens OX=9606 GN=HK2 PE=1 SV=2	||C(ITC[C])EGEDVVTLLK|C(ITC[C])EGEDVVTLLK|C(ITC[C])EGEDVVTLLK|C(ITC[C])EGEDVVTLLK|C(ITC[C])EGEDVVTLLK|	||1|1|1|1|2|	||1.13|0.77|0.99|1.0|0.71|	||NA|NA|NA|NA|0.0|	0.92	0.17464	6	5
Q8N8A6_338	DDX51	DDX51_HUMAN ATP-dependent RNA helicase DDX51 OS=Homo sapiens OX=9606 GN=DDX51 PE=1 SV=3	C(ITC[C])LADIVVATPGR|C(ITC[C])LADIVVATPGR|C(ITC[C])LADIVVATPGR|C(ITC[C])LADIVVATPGR|C(ITC[C])LADIVVATPGR||C(ITC[C])LADIVVATPGR|C(ITC[C])LADIVVATPGR	4|3|3|3|4||2|3	1.005|0.95|1.02|0.94|1.015||0.93|0.58	0.22142|0.04041|0.17321|0.02309|0.05909||0.09899|0.17321	0.92	0.15452	22	7
Q03252_212	LMNB2	LMNB2_HUMAN Lamin-B2 OS=Homo sapiens OX=9606 GN=LMNB2 PE=1 SV=4	C(ITC[C])QSLQEELDFR|C(ITC[C])QSLQEELDFR|C(ITC[C])QSLQEELDFR||C(ITC[C])QSLQEELDFR|C(ITC[C])QSLQEELDFR||	1|1|1||1|1||	1.01|0.7|1.01||1.04|0.84||	NA|NA|NA||NA|NA||	0.92	0.14612	5	5
Q13263_669	TRIM28	TIF1B_HUMAN Transcription intermediary factor 1-beta OS=Homo sapiens OX=9606 GN=TRIM28 PE=1 SV=5	||||C(ITC[C])HVLPDLK||C(ITC[C])HVLPDLK|C(ITC[C])HVLPDLK	||||4||1|3	||||0.96||0.78|1.02	||||0.04123||NA|0.15822	0.92	0.1249	8	3
Q96PK6_90	RBM14	RBM14_HUMAN RNA-binding protein 14 OS=Homo sapiens OX=9606 GN=RBM14 PE=1 SV=2	|||C(ITC[C])TSQELR|C(ITC[C])TSQELR|C(ITC[C])TSQELR||	|||1|2|1||	|||1.0|0.85|0.91||	|||NA|0.0|NA||	0.92	0.0755	4	3
P34949_11	MPI	MPI_HUMAN Mannose-6-phosphate isomerase OS=Homo sapiens OX=9606 GN=MPI PE=1 SV=2	||C(ITC[C])AVQQYAWGK|C(ITC[C])AVQQYAWGK|C(ITC[C])AVQQYAWGK|C(ITC[C])AVQQYAWGK||C(ITC[C])AVQQYAWGK	||2|1|2|1||2	||0.505|0.73|0.92|0.96||1.48	||0.0495|NA|0.01414|NA||0.0	0.919	0.36177	8	5
P47897_730	QARS1	SYQ_HUMAN Glutamine--tRNA ligase OS=Homo sapiens OX=9606 GN=QARS1 PE=1 SV=1	||C(ITC[C])SVALAK|C(ITC[C])SVALAK|C(ITC[C])SVALAK||C(ITC[C])SVALAK|C(ITC[C])SVALAK	||1|1|1||1|3	||0.85|0.68|1.24||0.82|1.0	||NA|NA|NA||NA|0.09238	0.918	0.21288	7	5
O95801_110	TTC4	TTC4_HUMAN Tetratricopeptide repeat protein 4 OS=Homo sapiens OX=9606 GN=TTC4 PE=1 SV=3	C(ITC[C])ADPDLNAVLYTNR|C(ITC[C])ADPDLNAVLYTNR||||C(ITC[C])ADPDLNAVLYTNR||	2|1||||2||	0.805|0.92||||1.025||	0.12021|NA||||0.02121||	0.91667	0.11004	5	3
Q7RTV0_58	PHF5A	PHF5A_HUMAN PHD finger-like domain-containing protein 5A OS=Homo sapiens OX=9606 GN=PHF5A PE=1 SV=1	|C(ITC[C])VICGGPGVSDAYYCK|C(ITC[C])VICGGPGVSDAYYCK|||||C(ITC[C])VICGGPGVSDAYYCK	|1|2|||||1	|0.92|0.96|||||0.87	|NA|0.01414|||||NA	0.91667	0.04509	4	3
O95299_253	NDUFA10	NDUAA_HUMAN NADH dehydrogenase [ubiquinone] 1 alpha subcomplex subunit 10, mitochondrial OS=Homo sapiens OX=9606 GN=NDUFA10 PE=1 SV=1	C(ITC[C])EVLQYSAR|C(ITC[C])EVLQYSAR|C(ITC[C])EVLQYSAR|C(ITC[C])EVLQYSAR|C(ITC[C])EVLQYSAR||C(ITC[C])EVLQYSAR|C(ITC[C])EVLQYSAR	4|2|1|4|1||1|1	1.19|1.19|0.72|0.635|1.05||0.89|0.74	0.11676|0.08485|NA|0.02872|NA||NA|NA	0.91643	0.2299	14	7
P42704_380	LRPPRC	LPPRC_HUMAN Leucine-rich PPR motif-containing protein, mitochondrial OS=Homo sapiens OX=9606 GN=LRPPRC PE=1 SV=3	C(ITC[C])VTMNTPVEK|C(ITC[C])VTMNTPVEK|C(ITC[C])VTMNTPVEK|C(ITC[C])VTMNTPVEK||C(ITC[C])VTMNTPVEK|C(ITC[C])VTMNTPVEK|C(ITC[C])VTMNTPVEK	1|3|2|1||3|3|3	1.07|1.22|0.74|0.79||0.85|0.67|1.07	NA|0.13279|0.02828|NA||0.05774|0.06083|0.14468	0.91571	0.20476	16	7
Q12906_203	ILF3	ILF3_HUMAN Interleukin enhancer-binding factor 3 OS=Homo sapiens OX=9606 GN=ILF3 PE=1 SV=3	C(ITC[C])LAALASLR|C(ITC[C])LAALASLR|C(ITC[C])LAALASLR|C(ITC[C])LAALASLR|C(ITC[C])LAALASLR|C(ITC[C])LAALASLR|C(ITC[C])LAALASLR|C(ITC[C])LAALASLR	4|6|4|7|4|3|2|4	0.99|1.04|0.76|0.76|1.2|0.97|0.81|0.795	0.02828|0.14689|0.025|0.08907|0.08124|0.20785|0.0|0.03304	0.91562	0.1599	34	8
Q06203_105	PPAT	PUR1_HUMAN Amidophosphoribosyltransferase OS=Homo sapiens OX=9606 GN=PPAT PE=1 SV=1	|||C(ITC[C])QPFVVETLHGK||C(ITC[C])QPFVVETLHGK|C(ITC[C])QPFVVETLHGK|C(ITC[C])QPFVVETLHGK	|||1||1|1|1	|||0.66||0.94|1.26|0.8	|||NA||NA|NA|NA	0.915	0.25684	4	4
P48200_137	IREB2	IREB2_HUMAN Iron-responsive element-binding protein 2 OS=Homo sapiens OX=9606 GN=IREB2 PE=1 SV=4	C(ITC[C])AIQNAPNPGGGDLQK||C(ITC[C])AIQNAPNPGGGDLQK|C(ITC[C])AIQNAPNPGGGDLQK|||C(ITC[C])AIQNAPNPGGGDLQK|	1||2|1|||2|	1.18||0.955|0.79|||0.735|	NA||0.02121|NA|||0.03536|	0.915	0.19987	6	4
Q6P2E9_838	EDC4	EDC4_HUMAN Enhancer of mRNA-decapping protein 4 OS=Homo sapiens OX=9606 GN=EDC4 PE=1 SV=1	|C(ITC[C])STLAESPR||C(ITC[C])STLAESPR|C(ITC[C])STLAESPR|C(ITC[C])STLAESPR|C(ITC[C])STLAESPR|C(ITC[C])STLAESPR	|2||1|1|1|2|1	|0.735||0.93|0.89|1.13|0.85|0.95	|0.00707||NA|NA|NA|0.14142|NA	0.91417	0.13032	8	6
Q06547_331	GABPB1	GABP1_HUMAN GA-binding protein subunit beta-1 OS=Homo sapiens OX=9606 GN=GABPB1 PE=1 SV=2	||||C(ITC[C])IEIIENR||C(ITC[C])IEIIENR|C(ITC[C])IEIIENR	||||2||1|1	||||1.05||0.84|0.85	||||0.0||NA|NA	0.91333	0.11846	4	3
O95817_179	BAG3	BAG3_HUMAN BAG family molecular chaperone regulator 3 OS=Homo sapiens OX=9606 GN=BAG3 PE=1 SV=3	|||C(ITC[C])SSSSSSASLPSSGR||C(ITC[C])SSSSSSASLPSSGR|C(ITC[C])SSSSSSASLPSSGR|	|||2||1|1|	|||0.95||0.87|0.92|	|||0.0||NA|NA|	0.91333	0.04041	4	3
Q9H9E3_25	COG4	COG4_HUMAN Conserved oligomeric Golgi complex subunit 4 OS=Homo sapiens OX=9606 GN=COG4 PE=1 SV=3	C(ITC[C])SEISAELIR||C(ITC[C])SEISAELIR|C(ITC[C])SEISAELIR||||	1||1|1||||	0.89||0.9|0.95||||	NA||NA|NA||||	0.91333	0.03215	3	3
Q8NAV1_158	PRPF38A	PR38A_HUMAN Pre-mRNA-splicing factor 38A OS=Homo sapiens OX=9606 GN=PRPF38A PE=1 SV=1	C(ITC[C])DIILPR|C(ITC[C])DIILPR|C(ITC[C])DIILPR|C(ITC[C])DIILPR|C(ITC[C])DIILPR|C(ITC[C])DIILPR|C(ITC[C])DIILPR|C(ITC[C])DIILPR	4|1|4|4|2|3|2|3	1.31|1.34|0.53|0.65|0.945|0.89|0.84|0.8	0.27897|NA|0.065|0.03317|0.03536|0.20809|0.01414|0.01528	0.91312	0.28672	23	8
Q08211_438	DHX9	DHX9_HUMAN ATP-dependent RNA helicase A OS=Homo sapiens OX=9606 GN=DHX9 PE=1 SV=4	C(ITC[C])NIVVTQPR|C(ITC[C])NIVVTQPR|C(ITC[C])NIVVTQPR|C(ITC[C])NIVVTQPR|C(ITC[C])NIVVTQPR|C(ITC[C])NIVVTQPR|C(ITC[C])NIVVTQPR|C(ITC[C])NIVVTQPR	3|6|3|4|2|5|2|6	1.02|1.04|0.92|0.775|0.89|0.99|0.905|0.765	0.05774|0.10954|0.00577|0.03109|0.0|0.08961|0.03536|0.02098	0.91312	0.10358	31	8
Q9Y3I0_408	RTCB	RTCB_HUMAN RNA-splicing ligase RtcB homolog OS=Homo sapiens OX=9606 GN=RTCB PE=1 SV=1	C(ITC[C])SYVLTGTEQGMTETFGTTCHGAGR|C(ITC[C])SYVLTGTEQGMTETFGTTCHGAGR||C(ITC[C])SYVLTGTEQGMTETFGTTCHGAGR||C(ITC[C])SYVLTGTEQGMTETFGTTCHGAGR||	1|2||1||2||	0.67|0.71||1.01||1.26||	NA|0.25456||NA||0.0||	0.9125	0.27693	6	4
Q16222_251	UAP1	UAP1_HUMAN UDP-N-acetylhexosamine pyrophosphorylase OS=Homo sapiens OX=9606 GN=UAP1 PE=1 SV=3	|C(ITC[C])VDNILVK|C(ITC[C])VDNILVK|C(ITC[C])VDNILVK|C(ITC[C])VDNILVK|C(ITC[C])VDNILVK|C(ITC[C])VDNILVK|	|1|2|1|1|2|3|	|0.85|0.99|1.07|0.73|0.985|0.85|	|NA|0.0|NA|NA|0.43134|0.08386|	0.9125	0.12425	10	6
P11586_785	MTHFD1	C1TC_HUMAN C-1-tetrahydrofolate synthase, cytoplasmic OS=Homo sapiens OX=9606 GN=MTHFD1 PE=1 SV=3	C(ITC[C])THWAEGGK|C(ITC[C])THWAEGGK|C(ITC[C])THWAEGGK|C(ITC[C])THWAEGGK|C(ITC[C])THWAEGGK|C(ITC[C])THWAEGGK|C(ITC[C])THWAEGGK|C(ITC[C])THWAEGGK	10|11|9|8|5|6|6|8	1.29|1.21|0.59|0.685|1.02|0.915|0.735|0.845	0.13147|0.05446|0.0511|0.11186|0.05891|0.02401|0.04916|0.05755	0.91125	0.24911	63	8
Q99832_158	CCT7	TCPH_HUMAN T-complex protein 1 subunit eta OS=Homo sapiens OX=9606 GN=CCT7 PE=1 SV=2	C(ITC[C])AMTALSSK|C(ITC[C])AMTALSSK|C(ITC[C])AMTALSSK|C(ITC[C])AMTALSSK|C(ITC[C])AMTALSSK|C(ITC[C])AMTALSSK|C(ITC[C])AMTALSSK|C(ITC[C])AMTALSSK	7|6|7|5|4|3|4|2	0.52|0.53|0.97|0.99|1.17|1.16|0.94|1.005	7.36909|9.20349|0.33999|8.24868|0.85116|2.75184|0.09032|0.00707	0.91062	0.25256	38	8
A5YKK6_624	CNOT1	CNOT1_HUMAN CCR4-NOT transcription complex subunit 1 OS=Homo sapiens OX=9606 GN=CNOT1 PE=1 SV=2	C(ITC[C])PSILGGLAPEKDQPK C(ITC[C])PSILGGLAPEK|C(ITC[C])PSILGGLAPEKDQPK C(ITC[C])PSILGGLAPEK|C(ITC[C])PSILGGLAPEK|C(ITC[C])PSILGGLAPEK|C(ITC[C])PSILGGLAPEKDQPK C(ITC[C])PSILGGLAPEK|C(ITC[C])PSILGGLAPEK|C(ITC[C])PSILGGLAPEK|C(ITC[C])PSILGGLAPEKDQPK C(ITC[C])PSILGGLAPEK	6|7|3|3|3|5|2|6	1.53|1.17|0.52|0.66|0.97|0.96|0.7|0.77	0.25949|0.38546|0.0|0.07506|0.01155|0.1226|0.0|0.19967	0.91	0.32435	35	8
P0DN79_165	CBSL	CBSL_HUMAN Cystathionine beta-synthase-like protein OS=Homo sapiens OX=9606 GN=CBSL PE=1 SV=1	C(ITC[C])IIVMPEK|C(ITC[C])IIVMPEK|C(ITC[C])IIVMPEK|C(ITC[C])IIVMPEK||||	7|6|9|7||||	1.08|1.14|0.72|0.7||||	0.12562|0.12133|0.11907|0.08926||||	0.91	0.23238	29	4
O43815_765	STRN	STRN_HUMAN Striatin OS=Homo sapiens OX=9606 GN=STRN PE=1 SV=4	C(ITC[C])YIASAGADALAK|C(ITC[C])YIASAGADALAK|C(ITC[C])YIASAGADALAK|C(ITC[C])YIASAGADALAK||||C(ITC[C])YIASAGADALAK	5|4|2|1||||1	0.8|1.08|0.91|0.88||||0.88	0.06348|0.08718|0.01414|NA||||NA	0.91	0.10344	13	5
Q5UIP0_2169	RIF1	RIF1_HUMAN Telomere-associated protein RIF1 OS=Homo sapiens OX=9606 GN=RIF1 PE=1 SV=2	|||C(ITC[C])VWSPLASPSTSILK||C(ITC[C])VWSPLASPSTSILK||C(ITC[C])VWSPLASPSTSILK	|||1||1||1	|||0.99||0.94||0.8	|||NA||NA||NA	0.91	0.09849	3	3
Q99714_214	HSD17B10	HCD2_HUMAN 3-hydroxyacyl-CoA dehydrogenase type-2 OS=Homo sapiens OX=9606 GN=HSD17B10 PE=1 SV=3	C(ITC[C])NFLASQVPFPSR|C(ITC[C])NFLASQVPFPSR|C(ITC[C])NFLASQVPFPSR|C(ITC[C])NFLASQVPFPSR|C(ITC[C])NFLASQVPFPSR|C(ITC[C])NFLASQVPFPSR|C(ITC[C])NFLASQVPFPSR|C(ITC[C])NFLASQVPFPSR	3|4|4|6|2|4|5|5	1.06|1.02|0.825|0.875|0.875|0.975|0.81|0.84	0.09609|0.18212|0.07848|0.07305|0.00707|0.04796|0.15222|0.0555	0.91	0.09517	33	8
Q15042_873	RAB3GAP1	RB3GP_HUMAN Rab3 GTPase-activating protein catalytic subunit OS=Homo sapiens OX=9606 GN=RAB3GAP1 PE=1 SV=3	|C(ITC[C])LLEQPEVLVTGAGR|C(ITC[C])LLEQPEVLVTGAGR|C(ITC[C])LLEQPEVLVTGAGR||C(ITC[C])LLEQPEVLVTGAGR|C(ITC[C])LLEQPEVLVTGAGR|	|1|2|2||1|1|	|0.83|0.99|0.85||0.91|0.97|	|NA|0.0|0.14142||NA|NA|	0.91	0.07071	7	5
Q9BT40_213	INPP5K	INP5K_HUMAN Inositol polyphosphate 5-phosphatase K OS=Homo sapiens OX=9606 GN=INPP5K PE=1 SV=3	||C(ITC[C])YGGLWEK|C(ITC[C])YGGLWEK||||C(ITC[C])YGGLWEK	||1|2||||1	||0.91|0.89||||0.93	||NA|0.08485||||NA	0.91	0.02	4	3
P42704_500	LRPPRC	LPPRC_HUMAN Leucine-rich PPR motif-containing protein, mitochondrial OS=Homo sapiens OX=9606 GN=LRPPRC PE=1 SV=3	C(ITC[C])LSDSDMFSQAGLR|C(ITC[C])LSDSDMFSQAGLR|C(ITC[C])LSDSDMFSQAGLR|C(ITC[C])LSDSDMFSQAGLR||C(ITC[C])LSDSDMFSQAGLR|C(ITC[C])LSDSDMFSQAGLR|C(ITC[C])LSDSDMFSQAGLR	3|2|1|2||2|4|2	1.03|1.025|0.78|0.795||1.04|0.85|0.84	0.18903|0.06364|NA|0.00707||0.07071|0.12675|0.08485	0.90857	0.11771	16	7
O75643_1278	SNRNP200	U520_HUMAN U5 small nuclear ribonucleoprotein 200 kDa helicase OS=Homo sapiens OX=9606 GN=SNRNP200 PE=1 SV=2	C(ITC[C])ETQLPVSFR|C(ITC[C])ETQLPVSFR|C(ITC[C])ETQLPVSFR|C(ITC[C])ETQLPVSFR|C(ITC[C])ETQLPVSFR|C(ITC[C])ETQLPVSFR|C(ITC[C])ETQLPVSFR|C(ITC[C])ETQLPVSFR	2|2|1|1|1|1|1|3	0.625|0.87|0.86|0.85|1.26|0.98|0.89|0.93	0.03536|0.21213|NA|NA|NA|NA|NA|0.08083	0.90812	0.17611	12	8
P07195_36	LDHB	LDHB_HUMAN L-lactate dehydrogenase B chain OS=Homo sapiens OX=9606 GN=LDHB PE=1 SV=2	||C(ITC[C])AISILGK|C(ITC[C])AISILGK|C(ITC[C])AISILGK|C(ITC[C])AISILGK|C(ITC[C])AISILGK|C(ITC[C])AISILGK	||2|1|4|1|4|3	||1.185|0.87|0.94|0.8|0.84|0.81	||0.09192|NA|0.05|NA|0.015|0.07371	0.9075	0.14497	15	6
Q9NRR3_11	CDC42SE2	C42S2_HUMAN CDC42 small effector protein 2 OS=Homo sapiens OX=9606 GN=CDC42SE2 PE=1 SV=1	||||C(ITC[C])IAEQPQPK|C(ITC[C])IAEQPQPK|C(ITC[C])IAEQPQPK|C(ITC[C])IAEQPQPK	||||1|1|3|1	||||0.91|0.89|0.98|0.85	||||NA|NA|0.02887|NA	0.9075	0.05439	6	4
Q96KG9_241	SCYL1	SCYL1_HUMAN N-terminal kinase-like protein OS=Homo sapiens OX=9606 GN=SCYL1 PE=1 SV=1	||C(ITC[C])ELVGANPK|||C(ITC[C])ELVGANPK|C(ITC[C])ELVGANPK|	||1|||1|1|	||0.54|||1.08|1.1|	||NA|||NA|NA|	0.90667	0.3177	3	3
P46087_487	NOP2	NOP2_HUMAN Probable 28S rRNA (cytosine(4447)-C(5))-methyltransferase OS=Homo sapiens OX=9606 GN=NOP2 PE=1 SV=2	C(ITC[C])AHLQK|C(ITC[C])AHLQK|C(ITC[C])AHLQK|||||	3|1|2|||||	1.0|1.04|0.68|||||	0.12662|NA|0.0|||||	0.90667	0.19732	6	3
Q6UW56_65	ATRAID	ARAID_HUMAN All-trans retinoic acid-induced differentiation factor OS=Homo sapiens OX=9606 GN=ATRAID PE=1 SV=2	|||CC(ITC[C])LNQK|CC(ITC[C])LNQK|CC(ITC[C])LNQK||	|||1|1|1||	|||0.72|1.02|0.98||	|||NA|NA|NA||	0.90667	0.16289	3	3
Q5T440_259	IBA57	CAF17_HUMAN Putative transferase CAF17, mitochondrial OS=Homo sapiens OX=9606 GN=IBA57 PE=1 SV=1	|C(ITC[C])YIGQELTAR|||||GC(ITC[C])YIGQELTAR|C(ITC[C])YIGQELTAR	|1|||||1|1	|0.81|||||1.08|0.83	|NA|||||NA|NA	0.90667	0.15044	3	3
Q53EL6_275	PDCD4	PDCD4_HUMAN Programmed cell death protein 4 OS=Homo sapiens OX=9606 GN=PDCD4 PE=1 SV=2	||||C(ITC[C])NTYIDSYK||C(ITC[C])NTYIDSYK|C(ITC[C])NTYIDSYK	||||1||1|2	||||0.83||1.01|0.88	||||NA||NA|0.0	0.90667	0.09292	4	3
P17987_236	TCP1	TCPA_HUMAN T-complex protein 1 subunit alpha OS=Homo sapiens OX=9606 GN=TCP1 PE=1 SV=1	||C(ITC[C])LDFSLQK|||C(ITC[C])LDFSLQK|C(ITC[C])LDFSLQK|	||1|||1|1|	||0.93|||0.89|0.9|	||NA|||NA|NA|	0.90667	0.02082	3	3
Q14247_246	CTTN	SRC8_HUMAN Src substrate cortactin OS=Homo sapiens OX=9606 GN=CTTN PE=1 SV=2	C(ITC[C])ALGWDHQEK|C(ITC[C])ALGWDHQEK|C(ITC[C])ALGWDHQEK|C(ITC[C])ALGWDHQEK|C(ITC[C])ALGWDHQEK||C(ITC[C])ALGWDHQEK|C(ITC[C])ALGWDHQEK	1|1|1|1|1||1|2	0.72|0.67|1.07|1.18|0.68||1.03|0.995	NA|NA|NA|NA|NA||NA|0.0495	0.90643	0.21081	8	7
Q92879_177	CELF1	CELF1_HUMAN CUGBP Elav-like family member 1 OS=Homo sapiens OX=9606 GN=CELF1 PE=1 SV=2	C(ITC[C])SSPMVVK||C(ITC[C])SSPMVVK||C(ITC[C])SSPMVVK|C(ITC[C])SSPMVVK||C(ITC[C])SSPMVVK	1||1||1|2||2	0.65||1.38||0.71|0.76||1.03	NA||NA||NA|0.0||0.14142	0.906	0.30221	7	5
Q9GZT4_269	SRR	SRR_HUMAN Serine racemase OS=Homo sapiens OX=9606 GN=SRR PE=1 SV=1	||C(ITC[C])ATQLVWER|C(ITC[C])ATQLVWER|C(ITC[C])ATQLVWER|C(ITC[C])ATQLVWER|C(ITC[C])ATQLVWER|C(ITC[C])ATQLVWER	||1|2|2|1|1|3	||0.53|0.955|0.86|0.97|1.14|0.98	||NA|0.34648|0.07071|NA|NA|0.07506	0.90583	0.20505	10	6
Q15910_414	EZH2	EZH2_HUMAN Histone-lysine N-methyltransferase EZH2 OS=Homo sapiens OX=9606 GN=EZH2 PE=1 SV=2	C(ITC[C])QTPIK|C(ITC[C])QTPIK|C(ITC[C])QTPIK|C(ITC[C])QTPIK||||	2|1|2|1||||	0.685|0.69|1.085|1.16||||	0.00707|NA|0.07778|NA||||	0.905	0.25302	6	4
Q9BQ52_136	ELAC2	RNZ2_HUMAN Zinc phosphodiesterase ELAC protein 2 OS=Homo sapiens OX=9606 GN=ELAC2 PE=1 SV=2	C(ITC[C])VLSGPPQLEK|C(ITC[C])VLSGPPQLEK|C(ITC[C])VLSGPPQLEK|C(ITC[C])VLSGPPQLEK||C(ITC[C])VLSGPPQLEK|C(ITC[C])VLSGPPQLEK|C(ITC[C])VLSGPPQLEK	5|6|4|4||2|2|2	0.78|1.07|0.92|0.925||0.82|0.81|1.01	0.01304|0.27031|0.01915|0.06652||0.09899|0.18385|0.0	0.905	0.10859	25	7
Q9NYP9_25	MIS18A	MS18A_HUMAN Protein Mis18-alpha OS=Homo sapiens OX=9606 GN=MIS18A PE=1 SV=1	|C(ITC[C])SDSSLLGK|C(ITC[C])SDSSLLGK|C(ITC[C])SDSSLLGK|||C(ITC[C])SDSSLLGK|C(ITC[C])SDSSLLGK	|1|3|2|||1|2	|0.96|0.93|0.835|||0.97|0.83	|NA|0.02309|0.19092|||NA|0.05657	0.905	0.06782	9	5
O00571_317	DDX3X	DDX3X_HUMAN ATP-dependent RNA helicase DDX3X OS=Homo sapiens OX=9606 GN=DDX3X PE=1 SV=3	GC(ITC[C])HLLVATPGR C(ITC[C])HLLVATPGR|GC(ITC[C])HLLVATPGR C(ITC[C])HLLVATPGR|GC(ITC[C])HLLVATPGR|GC(ITC[C])HLLVATPGR C(ITC[C])HLLVATPGR|GC(ITC[C])HLLVATPGR C(ITC[C])HLLVATPGR|GC(ITC[C])HLLVATPGR C(ITC[C])HLLVATPGR|GC(ITC[C])HLLVATPGR C(ITC[C])HLLVATPGR|GC(ITC[C])HLLVATPGR C(ITC[C])HLLVATPGR	10|5|6|9|12|7|9|10	1.035|1.23|0.51|0.7|1.04|1.01|0.83|0.88	1.43051|0.03975|0.1138|0.21886|0.13117|0.17886|0.28852|0.12572	0.90437	0.22554	68	8
Q86W42_279	THOC6	THOC6_HUMAN THO complex subunit 6 homolog OS=Homo sapiens OX=9606 GN=THOC6 PE=1 SV=1	C(ITC[C])VNQWQLSGELK|C(ITC[C])VNQWQLSGELK|C(ITC[C])VNQWQLSGELK|C(ITC[C])VNQWQLSGELK|||C(ITC[C])VNQWQLSGELK|C(ITC[C])VNQWQLSGELK	1|3|2|2|||2|1	0.83|0.54|0.885|1.05|||0.895|1.22	NA|0.00577|0.03536|0.08485|||0.02121|NA	0.90333	0.22785	11	6
P51452_22	DUSP3	DUS3_HUMAN Dual specificity protein phosphatase 3 OS=Homo sapiens OX=9606 GN=DUSP3 PE=1 SV=1	||C(ITC[C])YSLPSQPCNEVTPR|C(ITC[C])YSLPSQPCNEVTPR|C(ITC[C])YSLPSQPCNEVTPR|||	||1|2|1|||	||1.02|0.77|0.92|||	||NA|0.02828|NA|||	0.90333	0.12583	4	3
Q9NYL9_231	TMOD3	TMOD3_HUMAN Tropomodulin-3 OS=Homo sapiens OX=9606 GN=TMOD3 PE=1 SV=1	C(ITC[C])FSLAATR|C(ITC[C])FSLAATR|C(ITC[C])FSLAATR|C(ITC[C])FSLAATR||C(ITC[C])FSLAATR||	3|4|2|1||1||	0.67|0.665|1.12|1.08||0.98||	0.05196|0.01414|0.0|NA||NA||	0.903	0.22095	11	5
P52597_267	HNRNPF	HNRPF_HUMAN Heterogeneous nuclear ribonucleoprotein F OS=Homo sapiens OX=9606 GN=HNRNPF PE=1 SV=3	|C(ITC[C])LSGMYDHR|C(ITC[C])LSGMYDHR|C(ITC[C])LSGMYDHR|C(ITC[C])LSGMYDHR|C(ITC[C])LSGMYDHR|C(ITC[C])LSGMYDHR|C(ITC[C])LSGMYDHR	|1|1|3|2|2|5|5	|1.38|0.76|0.8|0.825|0.895|0.89|0.77	|NA|NA|0.07024|0.16263|0.23335|0.1923|0.06083	0.90286	0.21702	19	7
P30419_483	NMT1	NMT1_HUMAN Glycylpeptide N-tetradecanoyltransferase 1 OS=Homo sapiens OX=9606 GN=NMT1 PE=1 SV=2	C(ITC[C])PSMGAEK|C(ITC[C])PSMGAEK|C(ITC[C])PSMGAEK|C(ITC[C])PSMGAEK|C(ITC[C])PSMGAEK|C(ITC[C])PSMGAEK|C(ITC[C])PSMGAEK|C(ITC[C])PSMGAEK	1|1|1|2|1|1|1|2	0.73|0.23|0.92|0.84|0.88|1.21|1.28|1.13	NA|NA|NA|0.22627|NA|NA|NA|0.12728	0.9025	0.33286	10	8
Q14669_1225	TRIP12	TRIPC_HUMAN E3 ubiquitin-protein ligase TRIP12 OS=Homo sapiens OX=9606 GN=TRIP12 PE=1 SV=1	|C(ITC[C])LSQMEQFPVK|C(ITC[C])LSQMEQFPVK|C(ITC[C])LSQMEQFPVK|C(ITC[C])LSQMEQFPVK|||C(ITC[C])LSQMEQFPVK	|1|3|1|2|||2	|1.45|0.74|0.58|0.985|||0.755	|NA|0.01732|NA|0.00707|||0.00707	0.902	0.33865	9	5
P14999_339		LT_POVBA Large T antigen OS=BK polyomavirus (strain AS) OX=10631 PE=3 SV=1	||C(ITC[C])QQAVDTVLAK|C(ITC[C])QQAVDTVLAK|C(ITC[C])QQAVDTVLAK|C(ITC[C])QQAVDTVLAK|C(ITC[C])QQAVDTVLAK|	||2|6|1|2|1|	||0.86|0.48|1.24|1.05|0.88|	||0.21213|0.08981|NA|0.08485|NA|	0.902	0.28128	12	5
P42566_419	EPS15	EPS15_HUMAN Epidermal growth factor receptor substrate 15 OS=Homo sapiens OX=9606 GN=EPS15 PE=1 SV=2	C(ITC[C])AEEAQLISSLK|C(ITC[C])AEEAQLISSLK||C(ITC[C])AEEAQLISSLK||||	2|3||2||||	0.99|0.7||1.015||||	0.04243|0.54354||0.03536||||	0.90167	0.1751	7	3
Q9BZE4_174	GTPBP4	NOG1_HUMAN Nucleolar GTP-binding protein 1 OS=Homo sapiens OX=9606 GN=GTPBP4 PE=1 SV=3	|C(ITC[C])GYPNVGK|C(ITC[C])GYPNVGK|C(ITC[C])GYPNVGK|C(ITC[C])GYPNVGK||C(ITC[C])GYPNVGK|C(ITC[C])GYPNVGK	|1|1|2|1||1|1	|0.98|0.85|0.93|0.95||0.87|0.83	|NA|NA|0.07071|NA||NA|NA	0.90167	0.06014	7	6
A5YKK6_219	CNOT1	CNOT1_HUMAN CCR4-NOT transcription complex subunit 1 OS=Homo sapiens OX=9606 GN=CNOT1 PE=1 SV=2	C(ITC[C])PVVLAPLLYPEK|C(ITC[C])PVVLAPLLYPEK|C(ITC[C])PVVLAPLLYPEK||C(ITC[C])PVVLAPLLYPEK||C(ITC[C])PVVLAPLLYPEK|C(ITC[C])PVVLAPLLYPEK	2|1|1||1||2|1	1.015|1.03|0.66||0.71||1.0|0.99	0.00707|NA|NA||NA||0.0|NA	0.90083	0.16848	8	6
Q7Z2W4_272	ZC3HAV1	ZCCHV_HUMAN Zinc finger CCCH-type antiviral protein 1 OS=Homo sapiens OX=9606 GN=ZC3HAV1 PE=1 SV=3	||C(ITC[C])TPSPDQISHR|C(ITC[C])TPSPDQISHR|C(ITC[C])TPSPDQISHR|C(ITC[C])TPSPDQISHR|C(ITC[C])TPSPDQISHR|C(ITC[C])TPSPDQISHR	||3|2|2|3|3|3	||0.97|0.81|0.905|0.98|0.88|0.86	||0.14978|0.07071|0.00707|0.0866|0.04041|0.08145	0.90083	0.06545	16	6
P62140_171	PPP1CB	PP1B_HUMAN Serine/threonine-protein phosphatase PP1-beta catalytic subunit OS=Homo sapiens OX=9606 GN=PPP1CB PE=1 SV=3	C(ITC[C])HGGLSPDLQSMEQIR||C(ITC[C])HGGLSPDLQSMEQIR|C(ITC[C])HGGLSPDLQSMEQIR|C(ITC[C])HGGLSPDLQSMEQIR|C(ITC[C])HGGLSPDLQSMEQIR|C(ITC[C])HGGLSPDLQSMEQIR|C(ITC[C])HGGLSPDLQSMEQIR	2||3|4|3|3|3|5	1.05||0.79|0.685|1.1|1.01|0.82|0.85	0.05657||0.01528|0.13376|0.08021|0.13115|0.15588|0.02236	0.90071	0.15374	23	7
P07737_17	PFN1	PROF1_HUMAN Profilin-1 OS=Homo sapiens OX=9606 GN=PFN1 PE=1 SV=2	C(ITC[C])QDAAIVGYK|C(ITC[C])QDAAIVGYK|C(ITC[C])QDAAIVGYK|C(ITC[C])QDAAIVGYK|C(ITC[C])QDAAIVGYK|C(ITC[C])QDAAIVGYK|C(ITC[C])QDAAIVGYK|C(ITC[C])QDAAIVGYK	2|2|2|2|3|3|1|3	0.55|0.41|1.46|1.205|0.79|0.97|0.95|0.87	0.09899|0.14142|0.02828|0.19092|0.06351|0.07767|NA|0.06245	0.90063	0.33586	18	8
P40926_93	MDH2	MDHM_HUMAN Malate dehydrogenase, mitochondrial OS=Homo sapiens OX=9606 GN=MDH2 PE=1 SV=3	C(ITC[C])DVVVIPAGVPR||GC(ITC[C])DVVVIPAGVPR|GC(ITC[C])DVVVIPAGVPR|GC(ITC[C])DVVVIPAGVPR C(ITC[C])DVVVIPAGVPR|GC(ITC[C])DVVVIPAGVPR|GC(ITC[C])DVVVIPAGVPR C(ITC[C])DVVVIPAGVPR|GC(ITC[C])DVVVIPAGVPR C(ITC[C])DVVVIPAGVPR	1||1|2|5|2|5|5	0.79||0.63|0.93|1.07|1.18|0.83|0.87	NA||NA|0.0|0.07085|0.0|0.27905|0.24846	0.9	0.18212	21	7
O75152_636	ZC3H11A	ZC11A_HUMAN Zinc finger CCCH domain-containing protein 11A OS=Homo sapiens OX=9606 GN=ZC3H11A PE=1 SV=3	C(ITC[C])AAQTLEK|C(ITC[C])AAQTLEK|C(ITC[C])AAQTLEK|||||C(ITC[C])AAQTLEK	1|1|1|||||1	0.74|0.77|1.02|||||1.07	NA|NA|NA|||||NA	0.9	0.16912	4	4
P45974_838	USP5	UBP5_HUMAN Ubiquitin carboxyl-terminal hydrolase 5 OS=Homo sapiens OX=9606 GN=USP5 PE=1 SV=2	C(ITC[C])ASEKPPK|C(ITC[C])ASEKPPK|C(ITC[C])ASEKPPK|C(ITC[C])ASEKPPK||||	1|1|1|1||||	0.92|1.06|0.84|0.78||||	NA|NA|NA|NA||||	0.9	0.12111	4	4
P30050_17	RPL12	RL12_HUMAN 60S ribosomal protein L12 OS=Homo sapiens OX=9606 GN=RPL12 PE=1 SV=1	C(ITC[C])TGGEVGATSALAPK|C(ITC[C])TGGEVGATSALAPK|C(ITC[C])TGGEVGATSALAPK|C(ITC[C])TGGEVGATSALAPK|C(ITC[C])TGGEVGATSALAPK|C(ITC[C])TGGEVGATSALAPK|C(ITC[C])TGGEVGATSALAPK|C(ITC[C])TGGEVGATSALAPK	10|10|12|13|5|4|8|7	0.44|0.42|1.065|1.1|1.02|1.025|1.06|1.06	0.20563|0.03433|0.09928|0.09377|0.0743|0.02449|0.09407|0.13794	0.89875	0.29043	69	8
Q9UHI6_98	DDX20	DDX20_HUMAN Probable ATP-dependent RNA helicase DDX20 OS=Homo sapiens OX=9606 GN=DDX20 PE=1 SV=2	C(ITC[C])GLDLIVQAK|C(ITC[C])GLDLIVQAK|C(ITC[C])GLDLIVQAK|C(ITC[C])GLDLIVQAK|C(ITC[C])GLDLIVQAK|C(ITC[C])GLDLIVQAK|C(ITC[C])GLDLIVQAK|C(ITC[C])GLDLIVQAK	2|3|3|6|1|2|5|2	1.105|0.9|0.69|0.65|1.06|0.895|0.77|1.12	0.37477|0.04509|0.02646|0.02258|NA|0.00707|0.24994|0.0	0.89875	0.18499	24	8
Q9P2J5_936	LARS1	SYLC_HUMAN Leucine--tRNA ligase, cytoplasmic OS=Homo sapiens OX=9606 GN=LARS1 PE=1 SV=2	C(ITC[C])TIYVAK|C(ITC[C])TIYVAK|C(ITC[C])TIYVAK|C(ITC[C])TIYVAK|C(ITC[C])TIYVAK|C(ITC[C])TIYVAK||C(ITC[C])TIYVAK	2|2|1|1|1|1||1	1.06|1.47|0.68|0.54|0.93|0.94||0.67	0.07071|0.14142|NA|NA|NA|NA||NA	0.89857	0.31195	9	7
Q9H2W6_52	MRPL46	RM46_HUMAN 39S ribosomal protein L46, mitochondrial OS=Homo sapiens OX=9606 GN=MRPL46 PE=1 SV=1	||C(ITC[C])LQRPPVVSK||C(ITC[C])LQRPPVVSK|||C(ITC[C])LQRPPVVSK	||2||2|||2	||0.805||0.995|||0.895	||0.02121||0.02121|||0.0495	0.89833	0.09504	6	3
Q9NRX1_64	PNO1	PNO1_HUMAN RNA-binding protein PNO1 OS=Homo sapiens OX=9606 GN=PNO1 PE=1 SV=1	||C(ITC[C])GDGLLSGK|C(ITC[C])GDGLLSGK||C(ITC[C])GDGLLSGK|C(ITC[C])GDGLLSGK|C(ITC[C])GDGLLSGK	||1|2||1|2|1	||0.73|0.825||0.85|0.945|1.14	||NA|0.02121||NA|0.00707|NA	0.898	0.15543	7	5
P62333_170	PSMC6	PRS10_HUMAN 26S proteasome regulatory subunit 10B OS=Homo sapiens OX=9606 GN=PSMC6 PE=1 SV=1	C(ITC[C])LLYGPPGTGK|GC(ITC[C])LLYGPPGTGK C(ITC[C])LLYGPPGTGK|GC(ITC[C])LLYGPPGTGK C(ITC[C])LLYGPPGTGK|GC(ITC[C])LLYGPPGTGK C(ITC[C])LLYGPPGTGK|GC(ITC[C])LLYGPPGTGK C(ITC[C])LLYGPPGTGK|GC(ITC[C])LLYGPPGTGK C(ITC[C])LLYGPPGTGK|GC(ITC[C])LLYGPPGTGK C(ITC[C])LLYGPPGTGK|GC(ITC[C])LLYGPPGTGK C(ITC[C])LLYGPPGTGK	2|4|2|4|5|6|4|5	1.36|1.405|0.545|0.53|0.96|0.89|0.79|0.7	0.0|0.19916|0.16263|0.08057|0.06686|0.13648|0.30783|0.0455	0.8975	0.33494	32	8
Q9Y3I0_427	RTCB	RTCB_HUMAN RNA-splicing ligase RtcB homolog OS=Homo sapiens OX=9606 GN=RTCB PE=1 SV=1	|C(ITC[C])HGAGR||C(ITC[C])HGAGR||C(ITC[C])HGAGR||C(ITC[C])HGAGR	|1||1||1||2	|1.11||0.7||0.97||0.81	|NA||NA||NA||0.0	0.8975	0.17988	5	4
O75592_1169	MYCBP2	MYCB2_HUMAN E3 ubiquitin-protein ligase MYCBP2 OS=Homo sapiens OX=9606 GN=MYCBP2 PE=1 SV=4	|C(ITC[C])SILSPELALPTGSR|C(ITC[C])SILSPELALPTGSR|C(ITC[C])SILSPELALPTGSR|||C(ITC[C])SILSPELALPTGSR|	|1|2|1|||1|	|0.71|0.96|0.9|||1.02|	|NA|0.01414|NA|||NA|	0.8975	0.13426	5	4
P46013_958	MKI67	KI67_HUMAN Proliferation marker protein Ki-67 OS=Homo sapiens OX=9606 GN=MKI67 PE=1 SV=2	C(ITC[C])APMSDLTDLK|C(ITC[C])APMSDLTDLK|C(ITC[C])APMSDLTDLK|C(ITC[C])APMSDLTDLK|C(ITC[C])APMSDLTDLK|C(ITC[C])APMSDLTDLK|C(ITC[C])APMSDLTDLK|C(ITC[C])APMSDLTDLK	2|2|3|2|2|3|3|3	0.695|0.865|1.14|0.88|0.905|0.85|0.99|0.85	0.03536|0.06364|0.17616|0.01414|0.12021|0.0866|0.05132|0.03512	0.89687	0.12778	20	8
Q96F44_236	TRIM11	TRI11_HUMAN E3 ubiquitin-protein ligase TRIM11 OS=Homo sapiens OX=9606 GN=TRIM11 PE=1 SV=2	C(ITC[C])QLPALGLLQDIK|||C(ITC[C])QLPALGLLQDIK|||C(ITC[C])QLPALGLLQDIK|	1|||1|||1|	1.12|||0.84|||0.73|	NA|||NA|||NA|	0.89667	0.20108	3	3
Q9BUK6_411	MSTO1	MSTO1_HUMAN Protein misato homolog 1 OS=Homo sapiens OX=9606 GN=MSTO1 PE=1 SV=1	|||C(ITC[C])FAQSVVLR||C(ITC[C])FAQSVVLR||C(ITC[C])FAQSVVLR	|||2||1||1	|||0.98||1.02||0.69	|||0.01414||NA||NA	0.89667	0.18009	4	3
Q14781_284	CBX2	CBX2_HUMAN Chromobox protein homolog 2 OS=Homo sapiens OX=9606 GN=CBX2 PE=1 SV=2	||C(ITC[C])GLGLDLK|C(ITC[C])GLGLDLK|C(ITC[C])GLGLDLK|||	||2|3|2|||	||0.93|0.92|0.84|||	||0.05657|0.09644|0.01414|||	0.89667	0.04933	7	3
Q5VZ89_126	DENND4C	DEN4C_HUMAN DENN domain-containing protein 4C OS=Homo sapiens OX=9606 GN=DENND4C PE=1 SV=3	||C(ITC[C])ANVNNSSTTSQR|C(ITC[C])ANVNNSSTTSQR|||C(ITC[C])ANVNNSSTTSQR|	||2|1|||1|	||0.94|0.89|||0.86|	||0.0|NA|||NA|	0.89667	0.04041	4	3
Q13155_168	AIMP2	AIMP2_HUMAN Aminoacyl tRNA synthase complex-interacting multifunctional protein 2 OS=Homo sapiens OX=9606 GN=AIMP2 PE=1 SV=2	C(ITC[C])FGEQNKK C(ITC[C])FGEQNK|C(ITC[C])FGEQNKK C(ITC[C])FGEQNK|C(ITC[C])FGEQNK|C(ITC[C])FGEQNKK C(ITC[C])FGEQNK|C(ITC[C])FGEQNK|C(ITC[C])FGEQNK|C(ITC[C])FGEQNK|C(ITC[C])FGEQNK	4|5|4|6|3|3|4|3	0.555|0.68|1.05|0.97|1.03|0.95|0.985|0.95	0.03775|0.1004|0.03317|0.12586|0.01732|0.0|0.05196|0.01155	0.89625	0.17882	32	8
Q9Y2X3_106	NOP58	NOP58_HUMAN Nucleolar protein 58 OS=Homo sapiens OX=9606 GN=NOP58 PE=1 SV=1	C(ITC[C])IHSPVVNELMR||C(ITC[C])IHSPVVNELMR|C(ITC[C])IHSPVVNELMR|C(ITC[C])IHSPVVNELMR|C(ITC[C])IHSPVVNELMR|C(ITC[C])IHSPVVNELMR|C(ITC[C])IHSPVVNELMR	2||6|5|5|5|8|5	1.275||0.67|0.62|1.03|0.99|0.825|0.86	0.17678||0.24807|0.15476|0.09257|0.05119|0.09094|0.13773	0.89571	0.2251	36	7
Q8IWX8_190	CHERP	CHERP_HUMAN Calcium homeostasis endoplasmic reticulum protein OS=Homo sapiens OX=9606 GN=CHERP PE=1 SV=3	|||C(ITC[C])ELMAGHLR||C(ITC[C])ELMAGHLR||C(ITC[C])ELMAGHLR	|||1||1||2	|||0.66||0.94||1.085	|||NA||NA||0.38891	0.895	0.21604	4	3
P28340_263	POLD1	DPOD1_HUMAN DNA polymerase delta catalytic subunit OS=Homo sapiens OX=9606 GN=POLD1 PE=1 SV=2	||C(ITC[C])NWLELPAGK||C(ITC[C])NWLELPAGK|C(ITC[C])NWLELPAGK|C(ITC[C])NWLELPAGK|C(ITC[C])NWLELPAGK	||1||1|1|1|2	||0.7||1.04|1.0|0.96|0.775	||NA||NA|NA|NA|0.06364	0.895	0.14891	6	5
P52756_766	RBM5	RBM5_HUMAN RNA-binding protein 5 OS=Homo sapiens OX=9606 GN=RBM5 PE=1 SV=2	C(ITC[C])QGITAPIEAQVR|C(ITC[C])QGITAPIEAQVR|C(ITC[C])QGITAPIEAQVR|C(ITC[C])QGITAPIEAQVR|C(ITC[C])QGITAPIEAQVR|C(ITC[C])QGITAPIEAQVR|C(ITC[C])QGITAPIEAQVR|C(ITC[C])QGITAPIEAQVR	4|1|2|3|3|2|1|1	1.09|1.08|0.83|0.86|0.85|0.98|0.68|0.79	0.12842|NA|0.08485|0.07211|0.12124|0.04243|NA|NA	0.895	0.14353	17	8
Q8N1F7_328	NUP93	NUP93_HUMAN Nuclear pore complex protein Nup93 OS=Homo sapiens OX=9606 GN=NUP93 PE=1 SV=2	C(ITC[C])GDLLAASQVVNR|C(ITC[C])GDLLAASQVVNR|C(ITC[C])GDLLAASQVVNR|C(ITC[C])GDLLAASQVVNR|C(ITC[C])GDLLAASQVVNR|C(ITC[C])GDLLAASQVVNR|C(ITC[C])GDLLAASQVVNR|C(ITC[C])GDLLAASQVVNR	4|2|4|4|3|3|2|3	1.33|1.47|0.57|0.525|0.92|0.82|0.82|0.7	0.16583|0.0|0.10689|0.09323|0.05686|0.04359|0.05657|0.11676	0.89438	0.34064	25	8
Q9BY77_338	POLDIP3	PDIP3_HUMAN Polymerase delta-interacting protein 3 OS=Homo sapiens OX=9606 GN=POLDIP3 PE=1 SV=2	C(ITC[C])LDGQPMK|C(ITC[C])LDGQPMK|C(ITC[C])LDGQPMK|C(ITC[C])LDGQPMK|C(ITC[C])LDGQPMK|C(ITC[C])LDGQPMK|C(ITC[C])LDGQPMK|C(ITC[C])LDGQPMK	5|4|5|4|3|3|5|2	1.09|1.255|0.6|0.59|1.07|0.89|0.8|0.86	0.08758|0.06238|0.0251|0.04123|0.06928|0.03055|0.04438|0.01414	0.89437	0.23561	31	8
P63104_94	YWHAZ	1433Z_HUMAN 14-3-3 protein zeta/delta OS=Homo sapiens OX=9606 GN=YWHAZ PE=1 SV=1	|||C(ITC[C])NDVLSLLEK|C(ITC[C])NDVLSLLEK|C(ITC[C])NDVLSLLEK|C(ITC[C])NDVLSLLEK|C(ITC[C])NDVLSLLEK	|||2|3|3|3|5	|||0.88|1.07|0.83|0.85|0.84	|||0.0|0.12702|0.0|0.0|0.0495	0.894	0.10015	16	5
O75691_1794	UTP20	UTP20_HUMAN Small subunit processome component 20 homolog OS=Homo sapiens OX=9606 GN=UTP20 PE=1 SV=3	C(ITC[C])LASTTK|C(ITC[C])LASTTK|C(ITC[C])LASTTK|C(ITC[C])LASTTK|C(ITC[C])LASTTK|C(ITC[C])LASTTK|C(ITC[C])LASTTK|C(ITC[C])LASTTK	3|2|2|2|2|3|3|3	1.07|0.975|0.695|0.765|0.975|1.05|0.83|0.79	0.10017|0.00707|0.03536|0.02121|0.03536|0.02517|0.02646|0.04359	0.89375	0.14121	20	8
Q7L576_1241	CYFIP1	CYFP1_HUMAN Cytoplasmic FMR1-interacting protein 1 OS=Homo sapiens OX=9606 GN=CYFIP1 PE=1 SV=1	C(ITC[C])FQPPIHQSLASS|C(ITC[C])FQPPIHQSLASS|C(ITC[C])FQPPIHQSLASS|C(ITC[C])FQPPIHQSLASS|C(ITC[C])FQPPIHQSLASS|C(ITC[C])FQPPIHQSLASS|C(ITC[C])FQPPIHQSLASS|	5|4|7|5|1|1|4|	0.65|0.505|1.12|1.12|0.9|1.0|0.96|	0.10065|0.06551|0.10981|0.08337|NA|NA|0.03775|	0.89357	0.23404	27	7
P45954_175	ACADSB	ACDSB_HUMAN Short/branched chain specific acyl-CoA dehydrogenase, mitochondrial OS=Homo sapiens OX=9606 GN=ACADSB PE=1 SV=1	||C(ITC[C])LSEAGAGSDSFALK||C(ITC[C])LSEAGAGSDSFALK||C(ITC[C])LSEAGAGSDSFALK|	||1||1||2|	||0.63||1.25||0.8|	||NA||NA||0.0|	0.89333	0.32036	4	3
O60610_1227	DIAPH1	DIAP1_HUMAN Protein diaphanous homolog 1 OS=Homo sapiens OX=9606 GN=DIAPH1 PE=1 SV=2	|C(ITC[C])AVTSLLASELTK|C(ITC[C])AVTSLLASELTK|C(ITC[C])AVTSLLASELTK||||	|1|2|1||||	|1.12|0.57|0.99||||	|NA|0.0|NA||||	0.89333	0.28746	4	3
Q15233_145	NONO	NONO_HUMAN Non-POU domain-containing octamer-binding protein OS=Homo sapiens OX=9606 GN=NONO PE=1 SV=4	C(ITC[C])HSASLTVR|C(ITC[C])HSASLTVR|C(ITC[C])HSASLTVR|C(ITC[C])HSASLTVR|C(ITC[C])HSASLTVR|C(ITC[C])HSASLTVR||	1|2|3|6|2|1||	0.73|0.65|0.99|0.975|1.035|0.98||	NA|0.02828|0.18717|0.06501|0.00707|NA||	0.89333	0.16092	15	6
P09234_9	SNRPC	RU1C_HUMAN U1 small nuclear ribonucleoprotein C OS=Homo sapiens OX=9606 GN=SNRPC PE=1 SV=1	||||C(ITC[C])DTYLTHDSPSVR||C(ITC[C])DTYLTHDSPSVR|C(ITC[C])DTYLTHDSPSVR	||||1||1|3	||||0.79||1.0|0.89	||||NA||NA|0.14799	0.89333	0.10504	5	3
Q8N163_387	CCAR2	CCAR2_HUMAN Cell cycle and apoptosis regulator protein 2 OS=Homo sapiens OX=9606 GN=CCAR2 PE=1 SV=2	C(ITC[C])AQAQTGIDLSGCTK|||C(ITC[C])AQAQTGIDLSGCTK||C(ITC[C])AQAQTGIDLSGCTK||	1|||1||1||	0.93|||0.87||0.88||	NA|||NA||NA||	0.89333	0.03215	3	3
Q8NF37_514	LPCAT1	PCAT1_HUMAN Lysophosphatidylcholine acyltransferase 1 OS=Homo sapiens OX=9606 GN=LPCAT1 PE=1 SV=2	||C(ITC[C])ADFSPENSDAGR||C(ITC[C])ADFSPENSDAGR||C(ITC[C])ADFSPENSDAGR|	||2||1||1|	||0.89||0.88||0.91|	||0.0||NA||NA|	0.89333	0.01528	4	3
Q9NX05_14	FAM120C	F120C_HUMAN Constitutive coactivator of PPAR-gamma-like protein 2 OS=Homo sapiens OX=9606 GN=FAM120C PE=1 SV=3	C(ITC[C])PGAVVPVDLLK|C(ITC[C])PGAVVPVDLLK|C(ITC[C])PGAVVPVDLLK|||C(ITC[C])PGAVVPVDLLK||C(ITC[C])PGAVVPVDLLK	2|2|1|||1||1	0.905|0.8|0.92|||1.08||0.76	0.0495|0.0|NA|||NA||NA	0.893	0.12468	7	5
O14617_1133	AP3D1	AP3D1_HUMAN AP-3 complex subunit delta-1 OS=Homo sapiens OX=9606 GN=AP3D1 PE=1 SV=1	C(ITC[C])SDSTLLSNLLEEMK|C(ITC[C])SDSTLLSNLLEEMK|C(ITC[C])SDSTLLSNLLEEMK|||||	2|4|1|||||	0.915|1.03|0.73|||||	0.07778|0.04933|NA|||||	0.89167	0.15135	7	3
P62258_98	YWHAE	1433E_HUMAN 14-3-3 protein epsilon OS=Homo sapiens OX=9606 GN=YWHAE PE=1 SV=1	C(ITC[C])DILDVLDK|C(ITC[C])DILDVLDK|C(ITC[C])DILDVLDK|C(ITC[C])DILDVLDK|C(ITC[C])DILDVLDK|C(ITC[C])DILDVLDK|C(ITC[C])DILDVLDK|C(ITC[C])DILDVLDK	4|3|5|2|2|1|2|5	0.44|0.41|1.27|1.31|0.825|0.83|1.025|1.02	0.005|0.00577|0.01789|0.07071|0.00707|NA|0.03536|0.03286	0.89125	0.33735	24	8
O75153_1196	CLUH	CLU_HUMAN Clustered mitochondria protein homolog OS=Homo sapiens OX=9606 GN=CLUH PE=1 SV=2	C(ITC[C])LTQQAVALQR|C(ITC[C])LTQQAVALQR|C(ITC[C])LTQQAVALQR|C(ITC[C])LTQQAVALQR|C(ITC[C])LTQQAVALQR||C(ITC[C])LTQQAVALQR|	6|4|3|1|1||1|	0.65|0.645|1.01|1.07|1.06||0.91|	0.1775|0.0216|0.08083|NA|NA||NA|	0.89083	0.19684	16	6
O43402_24	EMC8	EMC8_HUMAN ER membrane protein complex subunit 8 OS=Homo sapiens OX=9606 GN=EMC8 PE=1 SV=1	|C(ITC[C])AVNGLLVAEK|C(ITC[C])AVNGLLVAEK|C(ITC[C])AVNGLLVAEK||C(ITC[C])AVNGLLVAEK|C(ITC[C])AVNGLLVAEK|C(ITC[C])AVNGLLVAEK	|1|2|3||3|3|2	|1.55|0.765|0.76||0.81|0.7|0.755	|NA|0.28991|0.01528||0.02887|0.03786|0.07778	0.89	0.32522	14	6
P49790_777	NUP153	NU153_HUMAN Nuclear pore complex protein Nup153 OS=Homo sapiens OX=9606 GN=NUP153 PE=1 SV=2	|C(ITC[C])TVTTGTLGFGDK|||||C(ITC[C])TVTTGTLGFGDK|C(ITC[C])TVTTGTLGFGDK	|1|||||4|1	|1.12|||||0.8|0.75	|NA|||||0.01258|NA	0.89	0.20075	6	3
Q9UMZ2_1134	SYNRG	SYNRG_HUMAN Synergin gamma OS=Homo sapiens OX=9606 GN=SYNRG PE=1 SV=2	C(ITC[C])LGSALNVIK||C(ITC[C])LGSALNVIK|C(ITC[C])LGSALNVIK|C(ITC[C])LGSALNVIK|||	2||1|2|2|||	0.995||0.94|0.665|0.96|||	0.13435||NA|0.28991|0.09899|||	0.89	0.15171	7	4
Q13686_304	ALKBH1	ALKB1_HUMAN Nucleic acid dioxygenase ALKBH1 OS=Homo sapiens OX=9606 GN=ALKBH1 PE=1 SV=2	C(ITC[C])LEAPLPAVLPR||C(ITC[C])LEAPLPAVLPR|||||C(ITC[C])LEAPLPAVLPR	1||2|||||1	0.94||0.84|||||0.89	NA||0.0|||||NA	0.89	0.05	4	3
O14980_34	XPO1	XPO1_HUMAN Exportin-1 OS=Homo sapiens OX=9606 GN=XPO1 PE=1 SV=1	C(ITC[C])LYHGEGAQQR|C(ITC[C])LYHGEGAQQR|C(ITC[C])LYHGEGAQQR|C(ITC[C])LYHGEGAQQR|C(ITC[C])LYHGEGAQQR|C(ITC[C])LYHGEGAQQR|C(ITC[C])LYHGEGAQQR|C(ITC[C])LYHGEGAQQR	2|2|4|3|6|4|9|3	1.36|1.38|0.52|0.51|1.005|0.92|0.74|0.68	0.08485|0.0|0.10376|0.02082|0.09416|0.04933|0.03606|0.02517	0.88938	0.34289	33	8
P62140_157	PPP1CB	PP1B_HUMAN Serine/threonine-protein phosphatase PP1-beta catalytic subunit OS=Homo sapiens OX=9606 GN=PPP1CB PE=1 SV=3	C(ITC[C])LPIAAIVDEK||C(ITC[C])LPIAAIVDEK|C(ITC[C])LPIAAIVDEK|C(ITC[C])LPIAAIVDEK|C(ITC[C])LPIAAIVDEK|C(ITC[C])LPIAAIVDEK|C(ITC[C])LPIAAIVDEK	2||5|3|2|2|3|4	1.45||0.67|0.65|0.965|0.97|0.79|0.725	0.55154||0.06229|0.02646|0.17678|0.04243|0.06028|0.0943	0.88857	0.27953	21	7
Q86W50_253	METTL16	MET16_HUMAN RNA N6-adenosine-methyltransferase METTL16 OS=Homo sapiens OX=9606 GN=METTL16 PE=1 SV=2	C(ITC[C])SLAPLKEELR|C(ITC[C])SLAPLKEELR|C(ITC[C])SLAPLKEELR|C(ITC[C])SLAPLKEELR||C(ITC[C])SLAPLKEELR||C(ITC[C])SLAPLKEELR	1|3|2|4||1||1	1.1|0.75|0.78|0.75||0.81||1.14	NA|0.13279|0.05657|0.06928||NA||NA	0.88833	0.18126	12	6
Q15365_109	PCBP1	PCBP1_HUMAN Poly(rC)-binding protein 1 OS=Homo sapiens OX=9606 GN=PCBP1 PE=1 SV=2	|LVVPATQC(ITC[C])GSLIGK|LVVPATQC(ITC[C])GSLIGK|LVVPATQC(ITC[C])GSLIGK||LVVPATQC(ITC[C])GSLIGK|LVVPATQC(ITC[C])GSLIGK|LVVPATQC(ITC[C])GSLIGK	|1|2|2||1|1|2	|1.53|0.8|0.585||0.88|0.84|0.69	|NA|0.01414|0.03536||NA|NA|0.04243	0.8875	0.33265	9	6
O14980_723	XPO1	XPO1_HUMAN Exportin-1 OS=Homo sapiens OX=9606 GN=XPO1 PE=1 SV=1	C(ITC[C])LSENISAAIQANGEMVTK|C(ITC[C])LSENISAAIQANGEMVTK|C(ITC[C])LSENISAAIQANGEMVTK|C(ITC[C])LSENISAAIQANGEMVTK||||C(ITC[C])LSENISAAIQANGEMVTK	6|4|2|4||||1	0.99|1.26|0.765|0.67||||0.75	1.27559|0.20224|0.09192|0.13574||||NA	0.887	0.24004	17	5
Q7L2E3_484	DHX30	DHX30_HUMAN ATP-dependent RNA helicase DHX30 OS=Homo sapiens OX=9606 GN=DHX30 PE=1 SV=1	C(ITC[C])NVIITQPR|C(ITC[C])NVIITQPR|C(ITC[C])NVIITQPR|C(ITC[C])NVIITQPR|C(ITC[C])NVIITQPR|C(ITC[C])NVIITQPR|C(ITC[C])NVIITQPR|C(ITC[C])NVIITQPR	3|3|3|5|1|2|2|3	0.97|0.96|0.71|0.82|0.86|1.015|1.03|0.73	0.02887|0.10693|0.0|0.04159|NA|0.06364|0.08485|0.04	0.88687	0.1255	22	8
Q53H12_43	AGK	AGK_HUMAN Acylglycerol kinase, mitochondrial OS=Homo sapiens OX=9606 GN=AGK PE=1 SV=2	||C(ITC[C])QEAQVFGNQLIPPNAQVK||C(ITC[C])QEAQVFGNQLIPPNAQVK|C(ITC[C])QEAQVFGNQLIPPNAQVK|C(ITC[C])QEAQVFGNQLIPPNAQVK|C(ITC[C])QEAQVFGNQLIPPNAQVK	||1||1|1|1|1	||0.76||0.79|0.96|0.79|1.13	||NA||NA|NA|NA|NA	0.886	0.15758	5	5
Q9UID3_190	VPS51	VPS51_HUMAN Vacuolar protein sorting-associated protein 51 homolog OS=Homo sapiens OX=9606 GN=VPS51 PE=1 SV=2	C(ITC[C])VELGAYGQAVR||C(ITC[C])VELGAYGQAVR|C(ITC[C])VELGAYGQAVR|C(ITC[C])VELGAYGQAVR|C(ITC[C])VELGAYGQAVR||C(ITC[C])VELGAYGQAVR	2||2|2|1|1||1	1.445||0.675|0.63|1.05|0.83||0.68	0.03536||0.14849|0.01414|NA|NA||NA	0.885	0.31464	9	6
Q8WXF1_216	PSPC1	PSPC1_HUMAN Paraspeckle component 1 OS=Homo sapiens OX=9606 GN=PSPC1 PE=1 SV=1	C(ITC[C])GDGAFLLTTTPR|C(ITC[C])GDGAFLLTTTPR|C(ITC[C])GDGAFLLTTTPR|C(ITC[C])GDGAFLLTTTPR|||C(ITC[C])GDGAFLLTTTPR|C(ITC[C])GDGAFLLTTTPR	3|6|3|3|||3|1	0.53|0.61|0.99|1.12|||0.93|1.13	0.03215|0.09867|0.27074|0.12166|||0.09539|NA	0.885	0.25689	19	6
Q13464_1283	ROCK1	ROCK1_HUMAN Rho-associated protein kinase 1 OS=Homo sapiens OX=9606 GN=ROCK1 PE=1 SV=1	|||EDLICPC(ITC[C])K|EDLICPC(ITC[C])K|EDLICPC(ITC[C])K||EDLICPC(ITC[C])K	|||1|1|1||1	|||0.73|1.02|0.85||0.94	|||NA|NA|NA||NA	0.885	0.1245	4	4
P49736_315	MCM2	MCM2_HUMAN DNA replication licensing factor MCM2 OS=Homo sapiens OX=9606 GN=MCM2 PE=1 SV=4	C(ITC[C])TGVLPQLSMVK|C(ITC[C])TGVLPQLSMVK|C(ITC[C])TGVLPQLSMVK|C(ITC[C])TGVLPQLSMVK|C(ITC[C])TGVLPQLSMVK|C(ITC[C])TGVLPQLSMVK|C(ITC[C])TGVLPQLSMVK|C(ITC[C])TGVLPQLSMVK	9|11|6|8|5|4|12|4	0.55|0.53|1.025|1.085|0.97|0.98|0.925|1.005	0.04314|0.09873|0.10483|0.09635|0.09783|0.17347|0.26721|0.01893	0.88375	0.21715	59	8
P03243_141		E1B55_ADE05 E1B 55 kDa protein OS=Human adenovirus C serotype 5 OX=28285 PE=1 SV=1	C(ITC[C])ANELDLLAQK|C(ITC[C])ANELDLLAQK|C(ITC[C])ANELDLLAQK||C(ITC[C])ANELDLLAQK|C(ITC[C])ANELDLLAQK|C(ITC[C])ANELDLLAQK|C(ITC[C])ANELDLLAQK	3|5|2||3|3|2|4	0.51|0.51|1.13||0.95|0.83|1.13|1.125	0.03786|0.11032|0.0||0.23671|0.03215|0.0|0.0238	0.88357	0.27873	22	7
Q96KR1_899	ZFR	ZFR_HUMAN Zinc finger RNA-binding protein OS=Homo sapiens OX=9606 GN=ZFR PE=1 SV=2	||C(ITC[C])LDALAALR|C(ITC[C])LDALAALR|C(ITC[C])LDALAALR|||C(ITC[C])LDALAALR	||2|3|1|||1	||0.76|0.9|1.04|||0.83	||0.05657|0.00577|NA|||NA	0.8825	0.11955	7	4
Q6PKG0_502	LARP1	LARP1_HUMAN La-related protein 1 OS=Homo sapiens OX=9606 GN=LARP1 PE=1 SV=2	||||C(ITC[C])PEFVPR|C(ITC[C])PEFVPR|C(ITC[C])PEFVPR|C(ITC[C])PEFVPR	||||1|3|1|2	||||0.88|0.83|0.94|0.88	||||NA|0.17898|NA|0.15556	0.8825	0.045	7	4
Q92841_319	DDX17	DDX17_HUMAN Probable ATP-dependent RNA helicase DDX17 OS=Homo sapiens OX=9606 GN=DDX17 PE=1 SV=2	C(ITC[C])TYLVLDEADR|C(ITC[C])TYLVLDEADR|C(ITC[C])TYLVLDEADR|C(ITC[C])TYLVLDEADR|C(ITC[C])TYLVLDEADR|C(ITC[C])TYLVLDEADR||C(ITC[C])TYLVLDEADR	3|4|3|2|2|2||2	0.71|0.795|0.99|0.885|0.98|0.94||0.87	0.01528|0.06702|0.26633|0.07778|0.01414|0.09899||0.12728	0.88143	0.1016	18	7
Q00839_607	HNRNPU	HNRPU_HUMAN Heterogeneous nuclear ribonucleoprotein U OS=Homo sapiens OX=9606 GN=HNRNPU PE=1 SV=6	AVVVC(ITC[C])PK|AVVVC(ITC[C])PK||AVVVC(ITC[C])PK||AVVVC(ITC[C])PK|AVVVC(ITC[C])PK|AVVVC(ITC[C])PK	1|1||3||1|1|2	0.8|1.03||0.75||1.17|0.67|0.865	NA|NA||0.3651||NA|NA|0.16263	0.88083	0.18667	9	6
Q86XF0_7	DHFR2	DYR2_HUMAN Dihydrofolate reductase 2, mitochondrial OS=Homo sapiens OX=9606 GN=DHFR2 PE=1 SV=1	C(ITC[C])IVAVSQNMGIGK||C(ITC[C])IVAVSQNMGIGK|C(ITC[C])IVAVSQNMGIGK|C(ITC[C])IVAVSQNMGIGK|C(ITC[C])IVAVSQNMGIGK||C(ITC[C])IVAVSQNMGIGK	1||4|2|1|3||3	1.28||0.74|0.82|0.84|0.88||0.72	NA||0.05745|0.01414|NA|0.20008||0.12124	0.88	0.20513	14	6
P42858_1961	HTT	HD_HUMAN Huntingtin OS=Homo sapiens OX=9606 GN=HTT PE=1 SV=2	||C(ITC[C])ENLSTPTMLK|C(ITC[C])ENLSTPTMLK|C(ITC[C])ENLSTPTMLK||C(ITC[C])ENLSTPTMLK|C(ITC[C])ENLSTPTMLK	||3|3|2||1|1	||0.75|0.79|0.8||0.94|1.12	||0.21127|0.05196|0.08485||NA|NA	0.88	0.15215	10	5
O15371_493	EIF3D	EIF3D_HUMAN Eukaryotic translation initiation factor 3 subunit D OS=Homo sapiens OX=9606 GN=EIF3D PE=1 SV=1	C(ITC[C])VIDICMK|C(ITC[C])VIDICMK|C(ITC[C])VIDICMK|||||	1|1|1|||||	0.94|0.9|0.8|||||	NA|NA|NA|||||	0.88	0.07211	3	3
P62979_149	RPS27A	RS27A_HUMAN Ubiquitin-40S ribosomal protein S27a OS=Homo sapiens OX=9606 GN=RPS27A PE=1 SV=2	C(ITC[C])FNKPEDK|C(ITC[C])FNKPEDK|C(ITC[C])FNKPEDK|C(ITC[C])FNKPEDK|C(ITC[C])FNKPEDK|C(ITC[C])FNKPEDK|C(ITC[C])FNKPEDK|C(ITC[C])FNKPEDK	5|2|2|2|3|2|3|5	0.54|0.57|0.915|0.925|0.92|0.875|1.2|1.09	0.01673|0.04243|0.02121|0.00707|0.02082|0.14849|0.07767|0.06025	0.87938	0.22774	24	8
O94832_143	MYO1D	MYO1D_HUMAN Unconventional myosin-Id OS=Homo sapiens OX=9606 GN=MYO1D PE=1 SV=2	|C(ITC[C])VLEAFGNAK|C(ITC[C])VLEAFGNAK|C(ITC[C])VLEAFGNAK|C(ITC[C])VLEAFGNAK|C(ITC[C])VLEAFGNAK|C(ITC[C])VLEAFGNAK|C(ITC[C])VLEAFGNAK	|1|2|2|1|1|2|1	|0.93|0.745|0.765|0.93|1.16|0.855|0.77	|NA|0.00707|0.00707|NA|NA|0.38891|NA	0.87929	0.14581	10	7
P20042_309	EIF2S2	IF2B_HUMAN Eukaryotic translation initiation factor 2 subunit 2 OS=Homo sapiens OX=9606 GN=EIF2S2 PE=1 SV=2	C(ITC[C])SVASIK||C(ITC[C])SVASIK|C(ITC[C])SVASIK||C(ITC[C])SVASIK||C(ITC[C])SVASIK	1||2|1||1||1	0.39||1.055|1.03||0.99||0.93	NA||0.10607|NA||NA||NA	0.879	0.27741	6	5
Q9NVN8_213	GNL3L	GNL3L_HUMAN Guanine nucleotide-binding protein-like 3-like protein OS=Homo sapiens OX=9606 GN=GNL3L PE=1 SV=1	C(ITC[C])SVPVDQASESLLK|C(ITC[C])SVPVDQASESLLK|C(ITC[C])SVPVDQASESLLK|C(ITC[C])SVPVDQASESLLK||C(ITC[C])SVPVDQASESLLK|C(ITC[C])SVPVDQASESLLK|C(ITC[C])SVPVDQASESLLK	3|3|1|3||1|1|1	0.99|0.97|0.79|0.85||1.03|0.82|0.7	0.05686|0.01732|NA|0.26652||NA|NA|NA	0.87857	0.12089	13	7
Q9NVI1_72	FANCI	FANCI_HUMAN Fanconi anemia group I protein OS=Homo sapiens OX=9606 GN=FANCI PE=1 SV=4	||C(ITC[C])IQLVESGDLQK||C(ITC[C])IQLVESGDLQK|||C(ITC[C])IQLVESGDLQK	||2||1|||1	||0.705||0.77|||1.16	||0.12021||NA|||NA	0.87833	0.24609	4	3
Q99439_175	CNN2	CNN2_HUMAN Calponin-2 OS=Homo sapiens OX=9606 GN=CNN2 PE=1 SV=4	C(ITC[C])ASQSGMTAYGTR||C(ITC[C])ASQSGMTAYGTR|C(ITC[C])ASQSGMTAYGTR||||	1||2|1||||	0.76||0.995|0.88||||	NA||0.26163|NA||||	0.87833	0.11751	4	3
O00429_431	DNM1L	DNM1L_HUMAN Dynamin-1-like protein OS=Homo sapiens OX=9606 GN=DNM1L PE=1 SV=2	||C(ITC[C])VELVHEEMQR|C(ITC[C])VELVHEEMQR|C(ITC[C])VELVHEEMQR|C(ITC[C])VELVHEEMQR|C(ITC[C])VELVHEEMQR|C(ITC[C])VELVHEEMQR	||2|3|4|1|3|4	||0.715|0.59|1.18|0.94|0.93|0.91	||0.0495|0.21221|0.35251|NA|0.09849|0.08617	0.8775	0.2041	17	6
Q9Y678_169	COPG1	COPG1_HUMAN Coatomer subunit gamma-1 OS=Homo sapiens OX=9606 GN=COPG1 PE=1 SV=1	C(ITC[C])SFDVVK|C(ITC[C])SFDVVK|C(ITC[C])SFDVVK|C(ITC[C])SFDVVK|C(ITC[C])SFDVVK|C(ITC[C])SFDVVK|C(ITC[C])SFDVVK|C(ITC[C])SFDVVK	3|3|6|2|2|1|2|2	0.74|0.72|0.99|0.855|0.785|1.16|0.995|0.775	0.01155|0.08737|0.06802|0.20506|0.06364|NA|0.07778|0.02121	0.8775	0.15563	21	8
P33992_482	MCM5	MCM5_HUMAN DNA replication licensing factor MCM5 OS=Homo sapiens OX=9606 GN=MCM5 PE=1 SV=5	C(ITC[C])SVLAAANSVFGR|C(ITC[C])SVLAAANSVFGR|C(ITC[C])SVLAAANSVFGR|C(ITC[C])SVLAAANSVFGR||C(ITC[C])SVLAAANSVFGR|C(ITC[C])SVLAAANSVFGR|C(ITC[C])SVLAAANSVFGR	3|1|3|4||4|4|4	1.2|1.03|0.73|0.75||0.935|0.76|0.735	0.11547|NA|0.02309|0.02217||0.01414|0.04435|0.08347	0.87714	0.1838	23	7
Q9BTD8_385	RBM42	RBM42_HUMAN RNA-binding protein 42 OS=Homo sapiens OX=9606 GN=RBM42 PE=1 SV=1	||||C(ITC[C])GDLGNEVNDDILAR||C(ITC[C])GDLGNEVNDDILAR|C(ITC[C])GDLGNEVNDDILAR	||||1||1|1	||||0.6||1.01|1.02	||||NA||NA|NA	0.87667	0.23965	3	3
P23526_228	AHCY	SAHH_HUMAN Adenosylhomocysteinase OS=Homo sapiens OX=9606 GN=AHCY PE=1 SV=4	|||C(ITC[C])AQALR|C(ITC[C])AQALR|C(ITC[C])AQALR||	|||1|1|1||	|||0.81|0.95|0.87||	|||NA|NA|NA||	0.87667	0.07024	3	3
P39687_87	ANP32A	AN32A_HUMAN Acidic leucine-rich nuclear phosphoprotein 32 family member A OS=Homo sapiens OX=9606 GN=ANP32A PE=1 SV=1	C(ITC[C])PNLTHLNLSGNK|C(ITC[C])PNLTHLNLSGNK|C(ITC[C])PNLTHLNLSGNK|C(ITC[C])PNLTHLNLSGNK||||	1|1|2|3||||	0.66|0.73|1.105|1.01||||	NA|NA|0.03536|0.05196||||	0.87625	0.21476	7	4
Q5JTH9_839	RRP12	RRP12_HUMAN RRP12-like protein OS=Homo sapiens OX=9606 GN=RRP12 PE=1 SV=2	||C(ITC[C])LLHIVR|C(ITC[C])LLHIVR||C(ITC[C])LLHIVR|C(ITC[C])LLHIVR|	||2|3||4|2|	||0.93|0.64||1.06|0.875|	||0.19799|0.08386||0.1682|0.23335|	0.87625	0.17556	11	4
Q14691_75	GINS1	PSF1_HUMAN DNA replication complex GINS protein PSF1 OS=Homo sapiens OX=9606 GN=GINS1 PE=1 SV=1	||C(ITC[C])TVAYLYDR|C(ITC[C])TVAYLYDR||C(ITC[C])TVAYLYDR|C(ITC[C])TVAYLYDR|	||2|1||1|2|	||0.675|0.88||0.99|0.96|	||0.00707|NA||NA|0.07071|	0.87625	0.14197	6	4
Q8WVM8_485	SCFD1	SCFD1_HUMAN Sec1 family domain-containing protein 1 OS=Homo sapiens OX=9606 GN=SCFD1 PE=1 SV=4	C(ITC[C])NLNPLQYIK|C(ITC[C])NLNPLQYIK|C(ITC[C])NLNPLQYIK|C(ITC[C])NLNPLQYIK|C(ITC[C])NLNPLQYIK|C(ITC[C])NLNPLQYIK|C(ITC[C])NLNPLQYIK|C(ITC[C])NLNPLQYIK	1|2|2|3|3|2|4|3	0.87|0.81|0.805|0.87|0.76|0.89|1.005|1.0	NA|0.2687|0.02121|0.06028|0.19088|0.04243|0.00957|0.04041	0.87625	0.08875	20	8
Q9H425_73	C1orf198	CA198_HUMAN Uncharacterized protein C1orf198 OS=Homo sapiens OX=9606 GN=C1orf198 PE=1 SV=1	C(ITC[C])LVGPR||C(ITC[C])LVGPR|C(ITC[C])LVGPR||||	2||1|2||||	0.86||0.95|0.815||||	0.01414||NA|0.06364||||	0.875	0.06874	5	3
Q86VP6_1007	CAND1	CAND1_HUMAN Cullin-associated NEDD8-dissociated protein 1 OS=Homo sapiens OX=9606 GN=CAND1 PE=1 SV=2	|C(ITC[C])IGDFLK|C(ITC[C])IGDFLK|C(ITC[C])IGDFLK|C(ITC[C])IGDFLK|C(ITC[C])IGDFLK|C(ITC[C])IGDFLK|C(ITC[C])IGDFLK	|1|2|6|2|1|2|6	|0.78|0.81|0.915|0.89|0.93|0.885|0.915	|NA|0.0|0.0407|0.09899|NA|0.02121|0.0745	0.875	0.05745	20	7
P68104_234	EEF1A1	EF1A1_HUMAN Elongation factor 1-alpha 1 OS=Homo sapiens OX=9606 GN=EEF1A1 PE=1 SV=1	C(ITC[C])ILPPTRPTDKPLR|C(ITC[C])ILPPTRPTDKPLR|C(ITC[C])ILPPTRPTDKPLR|C(ITC[C])ILPPTRPTDKPLR||C(ITC[C])ILPPTRPTDKPLR||C(ITC[C])ILPPTRPTDKPLR	3|1|3|4||2||1	0.99|1.12|0.69|0.74||0.995||0.71	0.01|NA|0.03055|0.0685||0.14849||NA	0.87417	0.18293	14	6
Q9Y312_181	AAR2	AAR2_HUMAN Protein AAR2 homolog OS=Homo sapiens OX=9606 GN=AAR2 PE=1 SV=2	C(ITC[C])GIECK|||C(ITC[C])GIECK||C(ITC[C])GIECK||	1|||1||1||	0.98|||0.98||0.66||	NA|||NA||NA||	0.87333	0.18475	3	3
Q96GX2_75	ATXN7L3B	A7L3B_HUMAN Ataxin-7-like protein 3B OS=Homo sapiens OX=9606 GN=ATXN7L3B PE=1 SV=2	|C(ITC[C])SLPGEPGNGPDQQLQR|C(ITC[C])SLPGEPGNGPDQQLQR|C(ITC[C])SLPGEPGNGPDQQLQR||||	|1|1|1||||	|0.84|0.82|0.96||||	|NA|NA|NA||||	0.87333	0.07572	3	3
O15226_246	NKRF	NKRF_HUMAN NF-kappa-B-repressing factor OS=Homo sapiens OX=9606 GN=NKRF PE=1 SV=2	|C(ITC[C])QNIYLTTGYAGSK|C(ITC[C])QNIYLTTGYAGSK|C(ITC[C])QNIYLTTGYAGSK||C(ITC[C])QNIYLTTGYAGSK|C(ITC[C])QNIYLTTGYAGSK|C(ITC[C])QNIYLTTGYAGSK	|1|1|1||1|1|3	|0.86|0.89|0.92||0.98|0.8|0.79	|NA|NA|NA||NA|NA|0.05774	0.87333	0.07257	8	6
Q8WUM4_524	PDCD6IP	PDC6I_HUMAN Programmed cell death 6-interacting protein OS=Homo sapiens OX=9606 GN=PDCD6IP PE=1 SV=1	C(ITC[C])KPEPELNAAIPSANPAK|C(ITC[C])KPEPELNAAIPSANPAK|C(ITC[C])KPEPELNAAIPSANPAK|C(ITC[C])KPEPELNAAIPSANPAK|C(ITC[C])KPEPELNAAIPSANPAK|C(ITC[C])KPEPELNAAIPSANPAK||C(ITC[C])KPEPELNAAIPSANPAK	2|1|4|2|1|3||1	1.075|1.3|0.575|0.715|0.84|0.78||0.82	0.00707|NA|0.01291|0.0495|NA|0.09815||NA	0.87214	0.24133	14	7
P30084_62	ECHS1	ECHM_HUMAN Enoyl-CoA hydratase, mitochondrial OS=Homo sapiens OX=9606 GN=ECHS1 PE=1 SV=4	|C(ITC[C])DGLIDELNQALK|||C(ITC[C])DGLIDELNQALK|C(ITC[C])DGLIDELNQALK|C(ITC[C])DGLIDELNQALK|C(ITC[C])DGLIDELNQALK	|1|||2|1|1|1	|0.35|||0.96|0.87|1.24|0.94	|NA|||0.0|NA|NA|NA	0.872	0.32415	6	5
Q9NZL4_172	HSPBP1	HPBP1_HUMAN Hsp70-binding protein 1 OS=Homo sapiens OX=9606 GN=HSPBP1 PE=1 SV=2	C(ITC[C])SQNVAAIQEQVLGLGALR|C(ITC[C])SQNVAAIQEQVLGLGALR|C(ITC[C])SQNVAAIQEQVLGLGALR|||C(ITC[C])SQNVAAIQEQVLGLGALR||C(ITC[C])SQNVAAIQEQVLGLGALR	2|2|1|||2||3	0.85|0.89|0.69|||0.94||0.99	0.15556|0.0|NA|||0.0||0.00577	0.872	0.11454	10	5
Q15417_173	CNN3	CNN3_HUMAN Calponin-3 OS=Homo sapiens OX=9606 GN=CNN3 PE=1 SV=1	C(ITC[C])ASQAGMTAYGTR|C(ITC[C])ASQAGMTAYGTR|C(ITC[C])ASQAGMTAYGTR|C(ITC[C])ASQAGMTAYGTR|C(ITC[C])ASQAGMTAYGTR|||C(ITC[C])ASQAGMTAYGTR	7|5|5|4|2|||2	0.64|0.64|0.89|1.065|0.92|||1.075	0.13913|0.10803|0.2259|0.15242|0.08485|||0.00707	0.87167	0.19429	25	6
P50991_295	CCT4	TCPD_HUMAN T-complex protein 1 subunit delta OS=Homo sapiens OX=9606 GN=CCT4 PE=1 SV=4	C(ITC[C])NVLLIQK|C(ITC[C])NVLLIQK|C(ITC[C])NVLLIQK|C(ITC[C])NVLLIQK|C(ITC[C])NVLLIQK||C(ITC[C])NVLLIQK|C(ITC[C])NVLLIQK	4|2|2|3|1||2|1	0.455|0.7|1.04|1.12|0.86||1.005|0.92	0.07274|0.43841|0.05657|0.03786|NA||0.17678|NA	0.87143	0.22852	15	7
Q8NCM8_4123	DYNC2H1	DYHC2_HUMAN Cytoplasmic dynein 2 heavy chain 1 OS=Homo sapiens OX=9606 GN=DYNC2H1 PE=1 SV=4	C(ITC[C])PLAWQSK|||C(ITC[C])PLAWQSK|C(ITC[C])PLAWQSK||C(ITC[C])PLAWQSK|	1|||1|1||2|	0.94|||0.76|0.89||0.895|	NA|||NA|NA||0.02121|	0.87125	0.0775	5	4
Q9UHJ6_132	SHPK	SHPK_HUMAN Sedoheptulokinase OS=Homo sapiens OX=9606 GN=SHPK PE=1 SV=3	C(ITC[C])SSEFLASLPQPK|C(ITC[C])SSEFLASLPQPK|C(ITC[C])SSEFLASLPQPK|C(ITC[C])SSEFLASLPQPK|C(ITC[C])SSEFLASLPQPK|C(ITC[C])SSEFLASLPQPK|C(ITC[C])SSEFLASLPQPK|C(ITC[C])SSEFLASLPQPK	2|2|1|4|1|1|7|5	0.965|1.26|0.62|0.66|1.03|0.85|0.75|0.83	0.00707|0.05657|NA|0.18556|NA|NA|0.26239|0.15959	0.87062	0.21035	23	8
O00159_802	MYO1C	MYO1C_HUMAN Unconventional myosin-Ic OS=Homo sapiens OX=9606 GN=MYO1C PE=1 SV=4	C(ITC[C])PENAFFLDHVR|C(ITC[C])PENAFFLDHVR|C(ITC[C])PENAFFLDHVR|C(ITC[C])PENAFFLDHVR|C(ITC[C])PENAFFLDHVR|C(ITC[C])PENAFFLDHVR|C(ITC[C])PENAFFLDHVR|C(ITC[C])PENAFFLDHVR	1|2|2|2|1|3|2|2	1.03|0.93|0.695|0.63|1.03|0.9|0.835|0.915	NA|0.02828|0.10607|0.0|NA|0.26514|0.02121|0.12021	0.87062	0.145	15	8
Q9BYP7_278	WNK3	WNK3_HUMAN Serine/threonine-protein kinase WNK3 OS=Homo sapiens OX=9606 GN=WNK3 PE=1 SV=3	|C(ITC[C])DNIFITGPTGSVK|C(ITC[C])DNIFITGPTGSVK|C(ITC[C])DNIFITGPTGSVK||C(ITC[C])DNIFITGPTGSVK|C(ITC[C])DNIFITGPTGSVK|C(ITC[C])DNIFITGPTGSVK	|3|2|2||2|2|3	|1.47|0.69|0.625||0.945|0.75|0.74	|0.10599|0.11314|0.02121||0.00707|0.01414|0.03786	0.87	0.31284	14	6
O15027_1522	SEC16A	SC16A_HUMAN Protein transport protein Sec16A OS=Homo sapiens OX=9606 GN=SEC16A PE=1 SV=4	||C(ITC[C])LQNENLIDK|C(ITC[C])LQNENLIDK||C(ITC[C])LQNENLIDK||	||3|3||2||	||1.03|0.63||0.95||	||0.20785|0.02082||0.0||	0.87	0.21166	8	3
Q9BUQ8_543	DDX23	DDX23_HUMAN Probable ATP-dependent RNA helicase DDX23 OS=Homo sapiens OX=9606 GN=DDX23 PE=1 SV=3	C(ITC[C])TYVVLDEADR|C(ITC[C])TYVVLDEADR|C(ITC[C])TYVVLDEADR|||||	1|1|1|||||	0.87|1.05|0.69|||||	NA|NA|NA|||||	0.87	0.18	3	3
O60825_105	PFKFB2	F262_HUMAN 6-phosphofructo-2-kinase/fructose-2,6-bisphosphatase 2 OS=Homo sapiens OX=9606 GN=PFKFB2 PE=1 SV=2	C(ITC[C])ALVALEDVK|C(ITC[C])ALVALEDVK||C(ITC[C])ALVALEDVK||C(ITC[C])ALVALEDVK|C(ITC[C])ALVALEDVK|C(ITC[C])ALVALEDVK	2|2||2||2|2|3	1.055|0.755||0.875||0.69|0.965|0.88	0.37477|0.23335||0.10607||0.0|0.00707|0.04726	0.87	0.13342	13	6
Q9Y4C2_335	TCAF1	TCAF1_HUMAN TRPM8 channel-associated factor 1 OS=Homo sapiens OX=9606 GN=TCAF1 PE=1 SV=3	||||C(ITC[C])FEPVSEVGVK||C(ITC[C])FEPVSEVGVK|C(ITC[C])FEPVSEVGVK	||||1||1|1	||||0.95||0.76|0.9	||||NA||NA|NA	0.87	0.09849	3	3
Q96FV9_49	THOC1	THOC1_HUMAN THO complex subunit 1 OS=Homo sapiens OX=9606 GN=THOC1 PE=1 SV=1	C(ITC[C])TLDQAFR|C(ITC[C])TLDQAFR|C(ITC[C])TLDQAFR|C(ITC[C])TLDQAFR|C(ITC[C])TLDQAFR|C(ITC[C])TLDQAFR|C(ITC[C])TLDQAFR|C(ITC[C])TLDQAFR	3|1|2|2|3|2|3|5	0.85|0.81|0.875|0.955|0.75|1.0|0.89|0.83	0.1365|NA|0.02121|0.0495|0.33262|0.14142|0.06658|0.14775	0.87	0.07978	21	8
Q00765_18	REEP5	REEP5_HUMAN Receptor expression-enhancing protein 5 OS=Homo sapiens OX=9606 GN=REEP5 PE=1 SV=3	C(ITC[C])MTDLLAK|C(ITC[C])MTDLLAK|C(ITC[C])MTDLLAK|C(ITC[C])MTDLLAK|C(ITC[C])MTDLLAK|C(ITC[C])MTDLLAK|C(ITC[C])MTDLLAK|C(ITC[C])MTDLLAK	5|5|3|4|4|4|2|3	0.76|0.83|0.92|0.77|0.91|0.97|0.895|0.9	0.0503|0.37399|0.12503|0.11206|0.1241|0.0818|0.06364|0.05508	0.86938	0.07495	30	8
O14929_27	HAT1	HAT1_HUMAN Histone acetyltransferase type B catalytic subunit OS=Homo sapiens OX=9606 GN=HAT1 PE=1 SV=1	C(ITC[C])NTNTAIELK|C(ITC[C])NTNTAIELK|C(ITC[C])NTNTAIELK|C(ITC[C])NTNTAIELK|C(ITC[C])NTNTAIELK|C(ITC[C])NTNTAIELK|C(ITC[C])NTNTAIELK|C(ITC[C])NTNTAIELK	2|3|4|4|3|3|2|3	0.89|1.03|0.82|0.8|0.82|0.88|0.815|0.89	0.07071|0.08888|0.06|0.04761|0.06506|0.05196|0.02121|0.0755	0.86812	0.07502	24	8
Q99439_215	CNN2	CNN2_HUMAN Calponin-2 OS=Homo sapiens OX=9606 GN=CNN2 PE=1 SV=4	C(ITC[C])ASQVGMTAPGTR|C(ITC[C])ASQVGMTAPGTR|C(ITC[C])ASQVGMTAPGTR|C(ITC[C])ASQVGMTAPGTR||C(ITC[C])ASQVGMTAPGTR|C(ITC[C])ASQVGMTAPGTR|C(ITC[C])ASQVGMTAPGTR	3|2|6|3||3|2|3	1.04|1.08|0.845|0.81||0.81|0.725|0.76	0.02517|0.09899|0.05492|0.07371||0.02309|0.06364|0.18771	0.86714	0.13778	22	7
Q96LJ7_235	DHRS1	DHRS1_HUMAN Dehydrogenase/reductase SDR family member 1 OS=Homo sapiens OX=9606 GN=DHRS1 PE=1 SV=1	|||C(ITC[C])VVALATDPNILSLSGK|||C(ITC[C])VVALATDPNILSLSGK|C(ITC[C])VVALATDPNILSLSGK	|||1|||2|2	|||0.61|||0.8|1.19	|||NA|||0.0|0.18385	0.86667	0.29569	5	3
P07814_1377	EPRS1	SYEP_HUMAN Bifunctional glutamate/proline--tRNA ligase OS=Homo sapiens OX=9606 GN=EPRS1 PE=1 SV=5	C(ITC[C])QFVAVR|C(ITC[C])QFVAVR||||||C(ITC[C])QFVAVR	1|2||||||1	0.78|0.74||||||1.08	NA|0.01414||||||NA	0.86667	0.18583	4	3
O75691_2186	UTP20	UTP20_HUMAN Small subunit processome component 20 homolog OS=Homo sapiens OX=9606 GN=UTP20 PE=1 SV=3	||||C(ITC[C])VTILVK|C(ITC[C])VTILVK|C(ITC[C])VTILVK|	||||1|1|1|	||||0.92|0.95|0.73|	||||NA|NA|NA|	0.86667	0.1193	3	3
Q5JTH9_512	RRP12	RRP12_HUMAN RRP12-like protein OS=Homo sapiens OX=9606 GN=RRP12 PE=1 SV=2	||C(ITC[C])LQSLCDLR||C(ITC[C])LQSLCDLR|C(ITC[C])LQSLCDLR|C(ITC[C])LQSLCDLR|C(ITC[C])LQSLCDLR	||1||1|1|1|1	||0.34||0.97|1.02|0.82|1.18	||NA||NA|NA|NA|NA	0.866	0.3209	5	5
Q14676_26	MDC1	MDC1_HUMAN Mediator of DNA damage checkpoint protein 1 OS=Homo sapiens OX=9606 GN=MDC1 PE=1 SV=3	|C(ITC[C])NVEPVGR|C(ITC[C])NVEPVGR|C(ITC[C])NVEPVGR||C(ITC[C])NVEPVGR|C(ITC[C])NVEPVGR|	|1|1|1||2|2|	|0.45|1.06|0.94||0.775|1.105|	|NA|NA|NA||0.13435|0.00707|	0.866	0.26532	7	5
Q9NYV4_1009	CDK12	CDK12_HUMAN Cyclin-dependent kinase 12 OS=Homo sapiens OX=9606 GN=CDK12 PE=1 SV=2	C(ITC[C])TAEQTLQSDFLK|C(ITC[C])TAEQTLQSDFLK|C(ITC[C])TAEQTLQSDFLK|C(ITC[C])TAEQTLQSDFLK|C(ITC[C])TAEQTLQSDFLK||C(ITC[C])TAEQTLQSDFLK|C(ITC[C])TAEQTLQSDFLK	2|2|3|2|4||2|1	1.18|1.115|0.77|0.68|0.925||0.64|0.75	0.28284|0.2192|0.00577|0.18385|0.14431||0.0|NA	0.86571	0.21308	16	7
O75534_53	CSDE1	CSDE1_HUMAN Cold shock domain-containing protein E1 OS=Homo sapiens OX=9606 GN=CSDE1 PE=1 SV=2	C(ITC[C])SQYNGNLQDLK|||C(ITC[C])SQYNGNLQDLK||C(ITC[C])SQYNGNLQDLK|C(ITC[C])SQYNGNLQDLK|	1|||3||1|1|	1.14|||0.86||0.74|0.72|	NA|||0.1106||NA|NA|	0.865	0.19348	6	4
P62306_66	SNRPF	RUXF_HUMAN Small nuclear ribonucleoprotein F OS=Homo sapiens OX=9606 GN=SNRPF PE=1 SV=1	C(ITC[C])NNVLYIR|C(ITC[C])NNVLYIR|C(ITC[C])NNVLYIR|C(ITC[C])NNVLYIR|C(ITC[C])NNVLYIR|C(ITC[C])NNVLYIR|C(ITC[C])NNVLYIR|C(ITC[C])NNVLYIR	5|3|5|3|3|4|4|3	0.69|0.72|0.94|0.9|0.9|0.92|0.96|0.89	0.04438|0.05508|0.06943|0.03055|0.02887|0.02|0.03775|0.00577	0.865	0.1017	30	8
Q92945_436	KHSRP	FUBP2_HUMAN Far upstream element-binding protein 2 OS=Homo sapiens OX=9606 GN=KHSRP PE=1 SV=4	C(ITC[C])GLVIGR|C(ITC[C])GLVIGR|C(ITC[C])GLVIGR|C(ITC[C])GLVIGR|C(ITC[C])GLVIGR|C(ITC[C])GLVIGR|C(ITC[C])GLVIGR|C(ITC[C])GLVIGR	5|5|6|7|5|4|4|8	0.42|0.4|1.01|1.01|1.01|1.025|0.98|1.06	0.0313|0.01342|0.04926|0.04541|0.03899|0.07932|0.20535|0.09438	0.86438	0.28137	44	8
P78527_25	PRKDC	PRKDC_HUMAN DNA-dependent protein kinase catalytic subunit OS=Homo sapiens OX=9606 GN=PRKDC PE=1 SV=3	C(ITC[C])GAALAGHQLIR|C(ITC[C])GAALAGHQLIR|C(ITC[C])GAALAGHQLIR|C(ITC[C])GAALAGHQLIR|C(ITC[C])GAALAGHQLIR|C(ITC[C])GAALAGHQLIR|C(ITC[C])GAALAGHQLIR|C(ITC[C])GAALAGHQLIR	9|14|7|7|12|8|7|5	1.35|1.3|0.46|0.53|0.93|0.895|0.68|0.77	0.08738|0.171|0.0995|0.06055|0.13162|0.09982|0.04315|0.0658	0.86437	0.32712	69	8
Q15003_239	NCAPH	CND2_HUMAN Condensin complex subunit 2 OS=Homo sapiens OX=9606 GN=NCAPH PE=1 SV=3	C(ITC[C])EIDPMFQK|C(ITC[C])EIDPMFQK|C(ITC[C])EIDPMFQK|C(ITC[C])EIDPMFQK|C(ITC[C])EIDPMFQK|C(ITC[C])EIDPMFQK|C(ITC[C])EIDPMFQK|C(ITC[C])EIDPMFQK	3|3|3|6|1|1|2|7	1.08|1.15|0.61|0.71|0.89|0.8|0.825|0.85	0.1963|2.04094|0.09539|0.07314|NA|NA|0.14849|0.28976	0.86437	0.17855	26	8
Q8IVS2_62	MCAT	FABD_HUMAN Malonyl-CoA-acyl carrier protein transacylase, mitochondrial OS=Homo sapiens OX=9606 GN=MCAT PE=1 SV=2	C(ITC[C])SVLLFPGQGSQVVGMGR|||C(ITC[C])SVLLFPGQGSQVVGMGR|C(ITC[C])SVLLFPGQGSQVVGMGR|C(ITC[C])SVLLFPGQGSQVVGMGR|C(ITC[C])SVLLFPGQGSQVVGMGR|C(ITC[C])SVLLFPGQGSQVVGMGR	1|||1|1|2|1|2	0.85|||0.58|1.08|0.82|0.91|0.945	NA|||NA|NA|0.42426|NA|0.06364	0.86417	0.16621	8	6
O43432_638	EIF4G3	IF4G3_HUMAN Eukaryotic translation initiation factor 4 gamma 3 OS=Homo sapiens OX=9606 GN=EIF4G3 PE=1 SV=2	||C(ITC[C])IQKPEGLPPISDVVLDK|C(ITC[C])IQKPEGLPPISDVVLDK|C(ITC[C])IQKPEGLPPISDVVLDK|C(ITC[C])IQKPEGLPPISDVVLDK|C(ITC[C])IQKPEGLPPISDVVLDK|C(ITC[C])IQKPEGLPPISDVVLDK	||2|2|3|3|3|4	||0.815|0.61|0.98|1.08|0.82|0.88	||0.06364|0.04243|0.08963|0.05292|0.03606|0.01732	0.86417	0.16076	17	6
P22102_646	GART	PUR2_HUMAN Trifunctional purine biosynthetic protein adenosine-3 OS=Homo sapiens OX=9606 GN=GART PE=1 SV=1	|C(ITC[C])GDQTLGDLLLTPTR|C(ITC[C])GDQTLGDLLLTPTR|C(ITC[C])GDQTLGDLLLTPTR||C(ITC[C])GDQTLGDLLLTPTR|C(ITC[C])GDQTLGDLLLTPTR|C(ITC[C])GDQTLGDLLLTPTR	|1|2|2||3|3|1	|0.92|0.85|0.78||0.64|0.81|1.18	|NA|0.18385|0.02828||0.23671|0.02309|NA	0.86333	0.18074	12	6
Q96PU8_35	QKI	QKI_HUMAN Protein quaking OS=Homo sapiens OX=9606 GN=QKI PE=1 SV=1	|||C(ITC[C])GIFNHLER|C(ITC[C])GIFNHLER|C(ITC[C])GIFNHLER||C(ITC[C])GIFNHLER	|||3|5|1||1	|||0.64|0.86|0.98||0.97	|||0.07572|0.04528|NA||NA	0.8625	0.15798	10	4
P82675_377	MRPS5	RT05_HUMAN 28S ribosomal protein S5, mitochondrial OS=Homo sapiens OX=9606 GN=MRPS5 PE=1 SV=2	|||C(ITC[C])GPLPIVVASPR||C(ITC[C])GPLPIVVASPR|C(ITC[C])GPLPIVVASPR|C(ITC[C])GPLPIVVASPR	|||2||1|3|4	|||0.77||0.88|0.79|1.005	|||0.09899||NA|0.01732|0.18735	0.86125	0.10711	10	4
O60313_375	OPA1	OPA1_HUMAN Dynamin-like 120 kDa protein, mitochondrial OS=Homo sapiens OX=9606 GN=OPA1 PE=1 SV=3	|C(ITC[C])TVSPETISLNVK|C(ITC[C])TVSPETISLNVK|C(ITC[C])TVSPETISLNVK||C(ITC[C])TVSPETISLNVK|C(ITC[C])TVSPETISLNVK|C(ITC[C])TVSPETISLNVK	|3|5|2||3|1|2	|0.93|0.79|0.94||0.93|0.68|0.895	|0.03|0.17152|0.0||0.03464|NA|0.03536	0.86083	0.10461	16	6
P13861_359	PRKAR2A	KAP2_HUMAN cAMP-dependent protein kinase type II-alpha regulatory subunit OS=Homo sapiens OX=9606 GN=PRKAR2A PE=1 SV=2	|C(ITC[C])LVMDVQAFER|C(ITC[C])LVMDVQAFER|C(ITC[C])LVMDVQAFER|||C(ITC[C])LVMDVQAFER|C(ITC[C])LVMDVQAFER	|1|4|2|||2|1	|0.9|0.605|0.78|||0.985|1.03	|NA|0.08446|0.02828|||0.20506|NA	0.86	0.17143	10	5
Q9BQ67_90	GRWD1	GRWD1_HUMAN Glutamate-rich WD repeat-containing protein 1 OS=Homo sapiens OX=9606 GN=GRWD1 PE=1 SV=1	||C(ITC[C])AGTQAESAQSNR|C(ITC[C])AGTQAESAQSNR|C(ITC[C])AGTQAESAQSNR|C(ITC[C])AGTQAESAQSNR||C(ITC[C])AGTQAESAQSNR	||1|1|1|1||1	||0.84|0.67|0.93|0.92||0.94	||NA|NA|NA|NA||NA	0.86	0.11336	5	5
Q9HC36_290	MRM3	MRM3_HUMAN rRNA methyltransferase 3, mitochondrial OS=Homo sapiens OX=9606 GN=MRM3 PE=1 SV=2	C(ITC[C])GLYAQAEMSNK||C(ITC[C])GLYAQAEMSNK|C(ITC[C])GLYAQAEMSNK||||	1||1|1||||	0.91||0.89|0.78||||	NA||NA|NA||||	0.86	0.07	3	3
O95453_169	PARN	PARN_HUMAN Poly(A)-specific ribonuclease PARN OS=Homo sapiens OX=9606 GN=PARN PE=1 SV=1	C(ITC[C])PVTIPEDQKK|C(ITC[C])PVTIPEDQKK|C(ITC[C])PVTIPEDQKK C(ITC[C])PVTIPEDQK|C(ITC[C])PVTIPEDQKK C(ITC[C])PVTIPEDQK|C(ITC[C])PVTIPEDQKK|C(ITC[C])PVTIPEDQKK C(ITC[C])PVTIPEDQK|C(ITC[C])PVTIPEDQKK C(ITC[C])PVTIPEDQK|C(ITC[C])PVTIPEDQKK C(ITC[C])PVTIPEDQK	5|5|12|8|2|2|3|4	0.91|0.72|0.945|0.96|0.815|0.595|0.9|1.03	0.26689|0.10854|0.16978|0.15257|0.27577|0.00707|0.25325|0.27197	0.85938	0.14246	41	8
Q9BYI3_300	FAM126A	HYCCI_HUMAN Hyccin OS=Homo sapiens OX=9606 GN=FAM126A PE=1 SV=2	C(ITC[C])IQVEITPTSSR|C(ITC[C])IQVEITPTSSR|C(ITC[C])IQVEITPTSSR|C(ITC[C])IQVEITPTSSR|C(ITC[C])IQVEITPTSSR||C(ITC[C])IQVEITPTSSR|C(ITC[C])IQVEITPTSSR	3|3|2|3|1||1|2	1.26|1.19|0.515|0.95|0.95||0.57|0.575	0.23544|0.02309|0.55861|0.08544|NA||NA|0.00707	0.85857	0.30807	15	7
Q9BY44_306	EIF2A	EIF2A_HUMAN Eukaryotic translation initiation factor 2A OS=Homo sapiens OX=9606 GN=EIF2A PE=1 SV=3	C(ITC[C])DPVFDFGTGPR|C(ITC[C])DPVFDFGTGPR||C(ITC[C])DPVFDFGTGPR||C(ITC[C])DPVFDFGTGPR|C(ITC[C])DPVFDFGTGPR|C(ITC[C])DPVFDFGTGPR	2|3||1||1|1|1	0.76|0.68||0.95||1.03|0.85|0.88	0.0|0.10408||NA||NA|NA|NA	0.85833	0.1264	9	6
O43896_711	KIF1C	KIF1C_HUMAN Kinesin-like protein KIF1C OS=Homo sapiens OX=9606 GN=KIF1C PE=1 SV=3	C(ITC[C])GLPSSGK||C(ITC[C])GLPSSGK|C(ITC[C])GLPSSGK|C(ITC[C])GLPSSGK|C(ITC[C])GLPSSGK||	1||2|1|2|1||	1.09||0.56|0.45|1.23|0.96||	NA||0.18385|NA|0.0|NA||	0.858	0.33833	7	5
Q8TDN6_115	BRIX1	BRX1_HUMAN Ribosome biogenesis protein BRX1 homolog OS=Homo sapiens OX=9606 GN=BRIX1 PE=1 SV=2	C(ITC[C])IYFEAK|C(ITC[C])IYFEAK|C(ITC[C])IYFEAK|C(ITC[C])IYFEAK||||C(ITC[C])IYFEAK	2|5|5|1||||3	0.71|0.75|0.89|0.8||||1.14	0.04243|0.09783|0.09165|NA||||0.42724	0.858	0.17138	16	5
Q96F86_47	EDC3	EDC3_HUMAN Enhancer of mRNA-decapping protein 3 OS=Homo sapiens OX=9606 GN=EDC3 PE=1 SV=1	C(ITC[C])LVPEVTFR|C(ITC[C])LVPEVTFR|C(ITC[C])LVPEVTFR|C(ITC[C])LVPEVTFR|C(ITC[C])LVPEVTFR|C(ITC[C])LVPEVTFR|C(ITC[C])LVPEVTFR|	3|5|3|6|3|1|4|	1.06|1.15|0.69|0.68|0.77|0.86|0.795|	0.09866|0.06427|0.02309|0.09304|0.04|NA|0.02944|	0.85786	0.18152	25	7
P13804_53	ETFA	ETFA_HUMAN Electron transfer flavoprotein subunit alpha, mitochondrial OS=Homo sapiens OX=9606 GN=ETFA PE=1 SV=1	||C(ITC[C])LVAGTK|C(ITC[C])LVAGTK|C(ITC[C])LVAGTK|C(ITC[C])LVAGTK|C(ITC[C])LVAGTK|C(ITC[C])LVAGTK	||1|1|2|1|3|5	||0.78|0.76|1.055|0.86|0.81|0.88	||NA|NA|0.14849|NA|0.01528|0.05788	0.8575	0.10704	13	6
Q9Y6C9_79	MTCH2	MTCH2_HUMAN Mitochondrial carrier homolog 2 OS=Homo sapiens OX=9606 GN=MTCH2 PE=1 SV=1	C(ITC[C])SGVLGTVVHGK|C(ITC[C])SGVLGTVVHGK||C(ITC[C])SGVLGTVVHGK|LC(ITC[C])SGVLGTVVHGK|LC(ITC[C])SGVLGTVVHGK|C(ITC[C])SGVLGTVVHGK|C(ITC[C])SGVLGTVVHGK	1|2||4|2|5|1|1	0.64|1.015||0.505|1.01|1.32|0.67|0.84	NA|1.25158||0.26298|0.21213|0.09711|NA|NA	0.85714	0.27958	16	7
O75607_70	NPM3	NPM3_HUMAN Nucleoplasmin-3 OS=Homo sapiens OX=9606 GN=NPM3 PE=1 SV=3	|C(ITC[C])LTEGAK C(ITC[C])LTEGAKDECNVVEVVAR|C(ITC[C])LTEGAK C(ITC[C])LTEGAKDECNVVEVVAR|C(ITC[C])LTEGAKDECNVVEVVAR|||C(ITC[C])LTEGAK|C(ITC[C])LTEGAK	|2|4|1|||1|1	|1.065|0.92|0.77|||0.96|0.57	|0.74246|0.03|NA|||NA|NA	0.857	0.19221	9	5
Q6UB35_291	MTHFD1L	C1TM_HUMAN Monofunctional C1-tetrahydrofolate synthase, mitochondrial OS=Homo sapiens OX=9606 GN=MTHFD1L PE=1 SV=1	||C(ITC[C])SHDFLSGK||C(ITC[C])SHDFLSGK|C(ITC[C])SHDFLSGK|C(ITC[C])SHDFLSGK|C(ITC[C])SHDFLSGK	||2||2|2|3|2	||0.58||0.99|0.815|0.91|0.99	||0.08485||0.0|0.0495|0.03464|0.0	0.857	0.17079	11	5
Q9NZW5_432	MPP6	MPP6_HUMAN MAGUK p55 subfamily member 6 OS=Homo sapiens OX=9606 GN=MPP6 PE=1 SV=2	||C(ITC[C])ILDVNPQALK|C(ITC[C])ILDVNPQALK|||C(ITC[C])ILDVNPQALK|	||2|1|||3|	||0.89|0.6|||1.08|	||0.0|NA|||0.07211|	0.85667	0.24173	6	3
O43504_23	LAMTOR5	LTOR5_HUMAN Ragulator complex protein LAMTOR5 OS=Homo sapiens OX=9606 GN=LAMTOR5 PE=1 SV=1	||||C(ITC[C])TDSQGLNLGCR||C(ITC[C])TDSQGLNLGCR|C(ITC[C])TDSQGLNLGCR	||||2||3|1	||||0.92||0.84|0.81	||||0.0||0.0|NA	0.85667	0.05686	6	3
Q07820_16	MCL1	MCL1_HUMAN Induced myeloid leukemia cell differentiation protein Mcl-1 OS=Homo sapiens OX=9606 GN=MCL1 PE=1 SV=3	|||||C(ITC[C])GGAGLGAGSGGATR|C(ITC[C])GGAGLGAGSGGATR|C(ITC[C])GGAGLGAGSGGATR	|||||2|1|1	|||||0.91|0.84|0.82	|||||0.0|NA|NA	0.85667	0.04726	4	3
Q9H1A3_215	METTL9	METL9_HUMAN Methyltransferase-like protein 9 OS=Homo sapiens OX=9606 GN=METTL9 PE=1 SV=1	C(ITC[C])DQPLTLLK|||C(ITC[C])DQPLTLLK|C(ITC[C])DQPLTLLK|C(ITC[C])DQPLTLLK|C(ITC[C])DQPLTLLK|C(ITC[C])DQPLTLLK	1|||1|1|1|1|2	0.96|||0.62|0.99|0.99|0.83|0.745	NA|||NA|NA|NA|NA|0.09192	0.85583	0.15193	7	6
O15269_438	SPTLC1	SPTC1_HUMAN Serine palmitoyltransferase 1 OS=Homo sapiens OX=9606 GN=SPTLC1 PE=1 SV=1	C(ITC[C])LPPPSIR|C(ITC[C])LPPPSIR|C(ITC[C])LPPPSIR|||||C(ITC[C])LPPPSIR	1|2|3|||||1	0.9|0.81|0.92|||||0.79	NA|0.18385|0.04933|||||NA	0.855	0.06455	7	4
Q6PKG0_864	LARP1	LARP1_HUMAN La-related protein 1 OS=Homo sapiens OX=9606 GN=LARP1 PE=1 SV=2	|||||C(ITC[C])TPQSLPK|GC(ITC[C])TPQSLPK|C(ITC[C])TPQSLPK	|||||2|1|1	|||||0.845|0.85|0.87	|||||0.02121|NA|NA	0.855	0.01323	4	3
Q13310_494	PABPC4	PABP4_HUMAN Polyadenylate-binding protein 4 OS=Homo sapiens OX=9606 GN=PABPC4 PE=1 SV=1	|||C(ITC[C])QSGGVPTAVQNLAPR|||C(ITC[C])QSGGVPTAVQNLAPR|C(ITC[C])QSGGVPTAVQNLAPR	|||1|||1|1	|||0.93|||0.78|0.85	|||NA|||NA|NA	0.85333	0.07506	3	3
Q00341_948	HDLBP	VIGLN_HUMAN Vigilin OS=Homo sapiens OX=9606 GN=HDLBP PE=1 SV=2	|C(ITC[C])DIIIISGR|C(ITC[C])DIIIISGR|C(ITC[C])DIIIISGR|C(ITC[C])DIIIISGR|C(ITC[C])DIIIISGR|C(ITC[C])DIIIISGR|C(ITC[C])DIIIISGR	|1|5|1|3|1|3|3	|1.36|0.65|0.57|0.98|0.85|0.8|0.76	|NA|0.01643|NA|0.15716|NA|0.01155|0.00577	0.85286	0.26011	17	7
P52272_114	HNRNPM	HNRPM_HUMAN Heterogeneous nuclear ribonucleoprotein M OS=Homo sapiens OX=9606 GN=HNRNPM PE=1 SV=3	GC(ITC[C])AVVEFK C(ITC[C])AVVEFK|GC(ITC[C])AVVEFK C(ITC[C])AVVEFK|GC(ITC[C])AVVEFK C(ITC[C])AVVEFK|GC(ITC[C])AVVEFK C(ITC[C])AVVEFK|GC(ITC[C])AVVEFK C(ITC[C])AVVEFK|GC(ITC[C])AVVEFK C(ITC[C])AVVEFK|GC(ITC[C])AVVEFK C(ITC[C])AVVEFK|GC(ITC[C])AVVEFK C(ITC[C])AVVEFK	12|14|7|11|12|8|10|14	0.5|0.49|1.01|0.99|0.97|0.855|0.995|1.01	0.05205|0.06318|0.15936|0.17919|0.11668|0.028|0.0907|0.07444	0.8525	0.22624	88	8
Q15054_137	POLD3	DPOD3_HUMAN DNA polymerase delta subunit 3 OS=Homo sapiens OX=9606 GN=POLD3 PE=1 SV=2	||C(ITC[C])AAAVPR|C(ITC[C])AAAVPR|C(ITC[C])AAAVPR||C(ITC[C])AAAVPR|C(ITC[C])AAAVPR	||1|1|2||2|1	||0.65|1.04|0.88||0.91|0.78	||NA|NA|0.0||0.0|NA	0.852	0.14618	7	5
P54577_442	YARS1	SYYC_HUMAN Tyrosine--tRNA ligase, cytoplasmic OS=Homo sapiens OX=9606 GN=YARS1 PE=1 SV=4	||||C(ITC[C])ASIEGINR|C(ITC[C])ASIEGINR|C(ITC[C])ASIEGINR|C(ITC[C])ASIEGINR	||||1|1|2|2	||||1.14|0.92|0.685|0.655	||||NA|NA|0.07778|0.03536	0.85	0.22675	6	4
P46060_82	RANGAP1	RAGP1_HUMAN Ran GTPase-activating protein 1 OS=Homo sapiens OX=9606 GN=RANGAP1 PE=1 SV=1	C(ITC[C])HWSDMFTGR|C(ITC[C])HWSDMFTGR|C(ITC[C])HWSDMFTGR|C(ITC[C])HWSDMFTGR|C(ITC[C])HWSDMFTGR||C(ITC[C])HWSDMFTGR|C(ITC[C])HWSDMFTGR	9|8|9|2|1||5|3	0.49|0.61|1.02|1.07|0.83||0.92|1.01	0.17714|0.1111|0.04419|0.0|NA||0.19373|0.19296	0.85	0.22189	37	7
P55060_195	CSE1L	XPO2_HUMAN Exportin-2 OS=Homo sapiens OX=9606 GN=CSE1L PE=1 SV=3	||||C(ITC[C])STHANDASALR|C(ITC[C])STHANDASALR|C(ITC[C])STHANDASALR|C(ITC[C])STHANDASALR	||||1|1|2|3	||||1.03|0.95|0.61|0.81	||||NA|NA|0.01414|0.1963	0.85	0.18403	7	4
P49915_554	GMPS	GUAA_HUMAN GMP synthase [glutamine-hydrolyzing] OS=Homo sapiens OX=9606 GN=GMPS PE=1 SV=1	||||C(ITC[C])HNVNR|C(ITC[C])HNVNR|C(ITC[C])HNVNR|	||||1|1|1|	||||0.86|0.75|0.94|	||||NA|NA|NA|	0.85	0.09539	3	3
Q99717_65	SMAD5	SMAD5_HUMAN Mothers against decapentaplegic homolog 5 OS=Homo sapiens OX=9606 GN=SMAD5 PE=1 SV=1	C(ITC[C])VTIPR|C(ITC[C])VTIPR|C(ITC[C])VTIPR|C(ITC[C])VTIPR|C(ITC[C])VTIPR|||C(ITC[C])VTIPR	1|2|1|1|2|||1	0.77|1.07|0.73|0.73|1.0|||0.79	NA|0.15556|NA|NA|0.01414|||NA	0.84833	0.14811	8	6
Q92558_296	WASF1	WASF1_HUMAN Wiskott-Aldrich syndrome protein family member 1 OS=Homo sapiens OX=9606 GN=WASF1 PE=1 SV=1	C(ITC[C])ISSATGLIENRPQSPATGR|C(ITC[C])ISSATGLIENRPQSPATGR|C(ITC[C])ISSATGLIENRPQSPATGR|||||	1|1|1|||||	0.63|0.96|0.95|||||	NA|NA|NA|||||	0.84667	0.18771	3	3
O95071_2267	UBR5	UBR5_HUMAN E3 ubiquitin-protein ligase UBR5 OS=Homo sapiens OX=9606 GN=UBR5 PE=1 SV=2	C(ITC[C])ATTPMAVHR|C(ITC[C])ATTPMAVHR|C(ITC[C])ATTPMAVHR|||||	1|1|1|||||	1.03|0.72|0.79|||||	NA|NA|NA|||||	0.84667	0.16258	3	3
Q5QJE6_484	DNTTIP2	TDIF2_HUMAN Deoxynucleotidyltransferase terminal-interacting protein 2 OS=Homo sapiens OX=9606 GN=DNTTIP2 PE=1 SV=2	C(ITC[C])DNALFVIDTTPGMSADK||C(ITC[C])DNALFVIDTTPGMSADK||||C(ITC[C])DNALFVIDTTPGMSADK|C(ITC[C])DNALFVIDTTPGMSADK	1||1||||1|2	0.67||1.21||||0.65|0.85	NA||NA||||NA|0.0	0.845	0.25942	5	4
Q08J23_221	NSUN2	NSUN2_HUMAN RNA cytosine C(5)-methyltransferase NSUN2 OS=Homo sapiens OX=9606 GN=NSUN2 PE=1 SV=2	C(ITC[C])YLLVHQAK|C(ITC[C])YLLVHQAK|C(ITC[C])YLLVHQAK|C(ITC[C])YLLVHQAK|C(ITC[C])YLLVHQAK||C(ITC[C])YLLVHQAK|C(ITC[C])YLLVHQAK	4|3|3|1|1||4|2	0.81|1.26|0.69|0.79|0.72||0.75|0.895	0.23894|0.40649|0.02309|NA|NA||0.12832|0.3182	0.845	0.19479	18	7
Q9UHI6_181	DDX20	DDX20_HUMAN Probable ATP-dependent RNA helicase DDX20 OS=Homo sapiens OX=9606 GN=DDX20 PE=1 SV=2	C(ITC[C])HIAVGSPGR|C(ITC[C])HIAVGSPGR|C(ITC[C])HIAVGSPGR|C(ITC[C])HIAVGSPGR|C(ITC[C])HIAVGSPGR|C(ITC[C])HIAVGSPGR|C(ITC[C])HIAVGSPGR|C(ITC[C])HIAVGSPGR	3|3|3|4|4|4|5|4	1.23|0.98|0.66|0.57|1.08|0.76|0.66|0.805	0.1249|0.13503|0.1253|0.08808|0.10392|0.02986|0.03114|0.11733	0.84312	0.23132	30	8
Q5T9A4_492	ATAD3B	ATD3B_HUMAN ATPase family AAA domain-containing protein 3B OS=Homo sapiens OX=9606 GN=ATAD3B PE=1 SV=1	||C(ITC[C])VLKPATEGK||C(ITC[C])VLKPATEGK|C(ITC[C])VLKPATEGK|C(ITC[C])VLKPATEGK|C(ITC[C])VLKPATEGK	||1||1|2|1|2	||0.67||0.95|0.985|0.73|0.88	||NA||NA|0.02121|NA|0.01414	0.843	0.13755	7	5
P52564_38	MAP2K6	MP2K6_HUMAN Dual specificity mitogen-activated protein kinase kinase 6 OS=Homo sapiens OX=9606 GN=MAP2K6 PE=1 SV=1	||C(ITC[C])ISIGNQNFEVK||C(ITC[C])ISIGNQNFEVK|C(ITC[C])ISIGNQNFEVK|C(ITC[C])ISIGNQNFEVK|C(ITC[C])ISIGNQNFEVK	||1||1|2|3|1	||0.83||0.92|0.895|0.77|0.8	||NA||NA|0.00707|0.02887|NA	0.843	0.06321	8	5
O95372_213	LYPLA2	LYPA2_HUMAN Acyl-protein thioesterase 2 OS=Homo sapiens OX=9606 GN=LYPLA2 PE=1 SV=1	C(ITC[C])PQEMAAVK|C(ITC[C])PQEMAAVK|C(ITC[C])PQEMAAVK||||C(ITC[C])PQEMAAVK|	1|3|2||||1|	0.77|0.8|0.74||||1.05|	NA|0.05774|0.29698||||NA|	0.84	0.14213	7	4
Q14204_3712	DYNC1H1	DYHC1_HUMAN Cytoplasmic dynein 1 heavy chain 1 OS=Homo sapiens OX=9606 GN=DYNC1H1 PE=1 SV=5	|||C(ITC[C])LNEVLK|C(ITC[C])LNEVLK|C(ITC[C])LNEVLK||	|||1|1|1||	|||0.7|0.89|0.93||	|||NA|NA|NA||	0.84	0.12288	3	3
Q8IWS0_28	PHF6	PHF6_HUMAN PHD finger protein 6 OS=Homo sapiens OX=9606 GN=PHF6 PE=1 SV=1	|C(ITC[C])GQLLISENQK||C(ITC[C])GQLLISENQK||||C(ITC[C])GQLLISENQK	|1||2||||2	|0.78||0.97||||0.77	|NA||0.0||||0.07071	0.84	0.11269	5	3
Q9UL46_91	PSME2	PSME2_HUMAN Proteasome activator complex subunit 2 OS=Homo sapiens OX=9606 GN=PSME2 PE=1 SV=4	C(ITC[C])GFLPGNEK|C(ITC[C])GFLPGNEK|C(ITC[C])GFLPGNEK|C(ITC[C])GFLPGNEK|C(ITC[C])GFLPGNEK|C(ITC[C])GFLPGNEK|C(ITC[C])GFLPGNEK|C(ITC[C])GFLPGNEK	3|3|5|2|4|2|2|2	0.73|0.8|0.87|0.86|0.9|0.86|0.86|0.835	0.02|0.11547|0.13349|0.0|0.04123|0.0|0.01414|0.02121	0.83938	0.05267	23	8
P52888_231	THOP1	THOP1_HUMAN Thimet oligopeptidase OS=Homo sapiens OX=9606 GN=THOP1 PE=1 SV=2	C(ITC[C])HVPETR|C(ITC[C])HVPETR||C(ITC[C])HVPETR|C(ITC[C])HVPETR|C(ITC[C])HVPETR|C(ITC[C])HVPETR|C(ITC[C])HVPETR	1|1||1|1|1|1|1	0.78|0.62||0.78|1.0|0.8|1.0|0.89	NA|NA||NA|NA|NA|NA|NA	0.83857	0.13594	7	7
Q9BZH6_1000	WDR11	WDR11_HUMAN WD repeat-containing protein 11 OS=Homo sapiens OX=9606 GN=WDR11 PE=1 SV=1	|C(ITC[C])TDQLLLLGQTDR|C(ITC[C])TDQLLLLGQTDR|C(ITC[C])TDQLLLLGQTDR|C(ITC[C])TDQLLLLGQTDR||C(ITC[C])TDQLLLLGQTDR|C(ITC[C])TDQLLLLGQTDR	|1|2|2|1||2|2	|1.16|0.79|0.75|0.89||0.77|0.67	|NA|0.01414|0.12728|NA||0.15556|0.0	0.83833	0.17279	10	6
Q12789_1091	GTF3C1	TF3C1_HUMAN General transcription factor 3C polypeptide 1 OS=Homo sapiens OX=9606 GN=GTF3C1 PE=1 SV=4	C(ITC[C])AMLEYTTGSR|C(ITC[C])AMLEYTTGSR|C(ITC[C])AMLEYTTGSR|C(ITC[C])AMLEYTTGSR|C(ITC[C])AMLEYTTGSR|C(ITC[C])AMLEYTTGSR|C(ITC[C])AMLEYTTGSR|C(ITC[C])AMLEYTTGSR	2|1|2|1|3|1|1|1	0.98|0.77|0.9|0.63|0.86|0.98|0.74|0.84	0.0|NA|0.11314|NA|0.25981|NA|NA|NA	0.8375	0.1208	12	8
Q6Y7W6_938	GIGYF2	GGYF2_HUMAN GRB10-interacting GYF protein 2 OS=Homo sapiens OX=9606 GN=GIGYF2 PE=1 SV=1	C(ITC[C])QSQATLSLAEIQK||C(ITC[C])QSQATLSLAEIQK|C(ITC[C])QSQATLSLAEIQK||||	1||1|1||||	0.75||0.76|1.0||||	NA||NA|NA||||	0.83667	0.14154	3	3
Q9BPU6_432	DPYSL5	DPYL5_HUMAN Dihydropyrimidinase-related protein 5 OS=Homo sapiens OX=9606 GN=DPYSL5 PE=1 SV=1	||C(ITC[C])HGVPLVTISR|C(ITC[C])HGVPLVTISR|C(ITC[C])HGVPLVTISR||C(ITC[C])HGVPLVTISR|	||2|2|1||1|	||0.745|0.84|0.94||0.82|	||0.03536|0.12728|NA||NA|	0.83625	0.08035	6	4
Q92830_817	KAT2A	KAT2A_HUMAN Histone acetyltransferase KAT2A OS=Homo sapiens OX=9606 GN=KAT2A PE=1 SV=3	C(ITC[C])ASALEK|||C(ITC[C])ASALEK|C(ITC[C])ASALEK|C(ITC[C])ASALEK||C(ITC[C])ASALEK	1|||1|1|2||1	0.87|||0.61|0.87|0.92||0.91	NA|||NA|NA|0.02828||NA	0.836	0.12837	6	5
Q99873_119	PRMT1	ANM1_HUMAN Protein arginine N-methyltransferase 1 OS=Homo sapiens OX=9606 GN=PRMT1 PE=1 SV=3	C(ITC[C])SSISDYAVK|C(ITC[C])SSISDYAVK|C(ITC[C])SSISDYAVK|C(ITC[C])SSISDYAVK||C(ITC[C])SSISDYAVK|C(ITC[C])SSISDYAVK|C(ITC[C])SSISDYAVK	5|6|1|2||2|2|2	0.8|0.85|0.72|0.79||0.94|0.83|0.92	0.0498|0.05989|NA|0.05657||0.09899|0.04243|0.01414	0.83571	0.07635	20	7
O95299_183	NDUFA10	NDUAA_HUMAN NADH dehydrogenase [ubiquinone] 1 alpha subcomplex subunit 10, mitochondrial OS=Homo sapiens OX=9606 GN=NDUFA10 PE=1 SV=1	||C(ITC[C])VDHYNEVK||C(ITC[C])VDHYNEVK|||C(ITC[C])VDHYNEVK	||1||1|||2	||0.57||0.92|||1.015	||NA||NA|||0.12021	0.835	0.23436	4	3
Q92797_859	SYMPK	SYMPK_HUMAN Symplekin OS=Homo sapiens OX=9606 GN=SYMPK PE=1 SV=2	C(ITC[C])LHSLTDK||C(ITC[C])LHSLTDK|C(ITC[C])LHSLTDK|C(ITC[C])LHSLTDK|C(ITC[C])LHSLTDK|C(ITC[C])LHSLTDK|C(ITC[C])LHSLTDK	1||6|4|4|7|1|1	1.09||0.555|0.62|0.98|0.95|0.96|0.69	NA||0.08892|0.09215|0.00816|0.18237|NA|NA	0.835	0.20839	24	7
Q8ND82_94	ZNF280C	Z280C_HUMAN Zinc finger protein 280C OS=Homo sapiens OX=9606 GN=ZNF280C PE=1 SV=1	C(ITC[C])RDPPSNPVAASPR||C(ITC[C])RDPPSNPVAASPR|C(ITC[C])RDPPSNPVAASPR||C(ITC[C])RDPPSNPVAASPR|C(ITC[C])RDPPSNPVAASPR|C(ITC[C])RDPPSNPVAASPR	3||6|6||2|3|2	0.87||0.74|0.865||0.895|0.77|0.87	0.01732||0.10381|0.16293||0.02121|0.0866|0.16971	0.835	0.06356	22	6
Q06830_83	PRDX1	PRDX1_HUMAN Peroxiredoxin-1 OS=Homo sapiens OX=9606 GN=PRDX1 PE=1 SV=1	C(ITC[C])HLAWVNTPK|C(ITC[C])HLAWVNTPK|C(ITC[C])HLAWVNTPK|C(ITC[C])HLAWVNTPK|C(ITC[C])HLAWVNTPK|C(ITC[C])HLAWVNTPK|C(ITC[C])HLAWVNTPK|C(ITC[C])HLAWVNTPK	1|4|3|6|4|2|3|2	0.86|0.685|0.76|0.795|0.785|0.83|0.99|0.97	NA|0.19849|0.07371|0.05742|0.17746|0.05657|0.04041|0.07071	0.83437	0.10359	25	8
Q5VTL8_29	PRPF38B	PR38B_HUMAN Pre-mRNA-splicing factor 38B OS=Homo sapiens OX=9606 GN=PRPF38B PE=1 SV=1	|C(ITC[C])GGGGATKPAVSGK|C(ITC[C])GGGGATKPAVSGK|C(ITC[C])GGGGATKPAVSGK|C(ITC[C])GGGGATKPAVSGK|C(ITC[C])GGGGATKPAVSGK||	|2|1|2|2|1||	|0.58|0.9|0.73|0.97|0.99||	|0.02828|NA|0.0|0.0|NA||	0.834	0.17501	8	5
Q9HBK9_334	AS3MT	AS3MT_HUMAN Arsenite methyltransferase OS=Homo sapiens OX=9606 GN=AS3MT PE=1 SV=3	|||C(ITC[C])SALELK||C(ITC[C])SALELK|C(ITC[C])SALELK|C(ITC[C])SALELK	|||1||1|1|2	|||0.74||0.98|0.74|0.875	|||NA||NA|NA|0.2192	0.83375	0.11643	5	4
P21266_178	GSTM3	GSTM3_HUMAN Glutathione S-transferase Mu 3 OS=Homo sapiens OX=9606 GN=GSTM3 PE=1 SV=3	C(ITC[C])LDEFPNLK|C(ITC[C])LDEFPNLK|C(ITC[C])LDEFPNLK|C(ITC[C])LDEFPNLK|C(ITC[C])LDEFPNLK||C(ITC[C])LDEFPNLK|C(ITC[C])LDEFPNLK	4|2|3|3|2||2|1	0.685|0.89|0.73|0.8|0.9||0.93|0.9	0.07506|0.01414|0.02887|0.10408|0.15556||0.21213|NA	0.83357	0.09595	17	7
Q9BZD4_289	NUF2	NUF2_HUMAN Kinetochore protein Nuf2 OS=Homo sapiens OX=9606 GN=NUF2 PE=1 SV=2	C(ITC[C])QLEVQLYQK||||||C(ITC[C])QLEVQLYQK|C(ITC[C])QLEVQLYQK	1||||||1|1	1.13||||||0.66|0.71	NA||||||NA|NA	0.83333	0.25813	3	3
P20585_142	MSH3	MSH3_HUMAN DNA mismatch repair protein Msh3 OS=Homo sapiens OX=9606 GN=MSH3 PE=1 SV=4	C(ITC[C])DSALPQSR||C(ITC[C])DSALPQSR|||C(ITC[C])DSALPQSR||	1||1|||2||	0.93||0.67|||0.9||	NA||NA|||0.15556||	0.83333	0.14224	4	3
P55060_842	CSE1L	XPO2_HUMAN Exportin-2 OS=Homo sapiens OX=9606 GN=CSE1L PE=1 SV=3	C(ITC[C])AVGITK||C(ITC[C])AVGITK|C(ITC[C])AVGITK|C(ITC[C])AVGITK|C(ITC[C])AVGITK|C(ITC[C])AVGITK|C(ITC[C])AVGITK	2||5|2|3|3|1|3	1.27||0.69|0.75|0.87|0.83|0.81|0.61	0.24042||0.04494|0.0|0.16166|0.01732|NA|0.12662	0.83286	0.21211	19	7
Q9Y265_49	RUVBL1	RUVB1_HUMAN RuvB-like 1 OS=Homo sapiens OX=9606 GN=RUVBL1 PE=1 SV=1	|||C(ITC[C])GVIVELIK|C(ITC[C])GVIVELIK||C(ITC[C])GVIVELIK|C(ITC[C])GVIVELIK	|||1|1||1|1	|||0.78|1.0||0.76|0.79	|||NA|NA||NA|NA	0.8325	0.11236	4	4
Q9HBH1_108	PDF	DEFM_HUMAN Peptide deformylase, mitochondrial OS=Homo sapiens OX=9606 GN=PDF PE=1 SV=1	|C(ITC[C])VGLSAPQLGVPR||C(ITC[C])VGLSAPQLGVPR||C(ITC[C])VGLSAPQLGVPR||C(ITC[C])VGLSAPQLGVPR	|1||1||2||2	|0.86||0.69||0.82||0.96	|NA||NA||0.14142||0.18385	0.8325	0.11177	6	4
Q3KQU3_251	MAP7D1	MA7D1_HUMAN MAP7 domain-containing protein 1 OS=Homo sapiens OX=9606 GN=MAP7D1 PE=1 SV=1	C(ITC[C])SVSAVNLPK|C(ITC[C])SVSAVNLPK|C(ITC[C])SVSAVNLPK|C(ITC[C])SVSAVNLPK||C(ITC[C])SVSAVNLPK||	1|1|2|3||2||	1.02|0.91|0.705|0.69||0.835||	NA|NA|0.03536|0.03512||0.16263||	0.832	0.1394	9	5
P33947_29	KDELR2	ERD22_HUMAN ER lumen protein-retaining receptor 2 OS=Homo sapiens OX=9606 GN=KDELR2 PE=1 SV=1	||C(ITC[C])AGISGK|C(ITC[C])AGISGK|SC(ITC[C])AGISGK C(ITC[C])AGISGK|SC(ITC[C])AGISGK C(ITC[C])AGISGK|C(ITC[C])AGISGK|SC(ITC[C])AGISGK C(ITC[C])AGISGK	||5|3|2|3|2|4	||0.66|0.64|1.21|0.89|0.79|0.8	||0.01871|0.01732|0.35355|0.35247|0.0|0.15513	0.83167	0.2076	19	6
Q8N726_100	CDKN2A	ARF_HUMAN Tumor suppressor ARF OS=Homo sapiens OX=9606 GN=CDKN2A PE=1 SV=2	C(ITC[C])PGGLPGHAGGAAPGR|C(ITC[C])PGGLPGHAGGAAPGR|C(ITC[C])PGGLPGHAGGAAPGR|C(ITC[C])PGGLPGHAGGAAPGR||||	3|3|4|3||||	0.66|0.93|1.115|0.62||||	0.25632|0.13856|0.07588|0.01732||||	0.83125	0.23396	13	4
Q7L2H7_134	EIF3M	EIF3M_HUMAN Eukaryotic translation initiation factor 3 subunit M OS=Homo sapiens OX=9606 GN=EIF3M PE=1 SV=1	C(ITC[C])GAIQYIPTELDQVR|C(ITC[C])GAIQYIPTELDQVR VAASC(ITC[C])GAIQYIPTELDQVR|C(ITC[C])GAIQYIPTELDQVR|C(ITC[C])GAIQYIPTELDQVR|C(ITC[C])GAIQYIPTELDQVR|C(ITC[C])GAIQYIPTELDQVR|C(ITC[C])GAIQYIPTELDQVR|C(ITC[C])GAIQYIPTELDQVR	7|6|7|2|4|5|1|4	0.52|0.345|1.11|1.14|0.94|0.85|0.9|0.835	0.14404|0.1747|0.21375|0.05657|0.21939|0.13248|NA|0.07506	0.83	0.2734	36	8
Q9H1B7_14	IRF2BPL	I2BPL_HUMAN Probable E3 ubiquitin-protein ligase IRF2BPL OS=Homo sapiens OX=9606 GN=IRF2BPL PE=1 SV=1	||C(ITC[C])YLCDLPR|C(ITC[C])YLCDLPR|C(ITC[C])YLCDLPR|C(ITC[C])YLCDLPR||C(ITC[C])YLCDLPR	||1|1|1|1||1	||0.65|0.67|1.15|1.0||0.68	||NA|NA|NA|NA||NA	0.83	0.23011	5	5
Q15020_670	SART3	SART3_HUMAN Squamous cell carcinoma antigen recognized by T-cells 3 OS=Homo sapiens OX=9606 GN=SART3 PE=1 SV=1	C(ITC[C])AAVDVEPPSK|C(ITC[C])AAVDVEPPSK|C(ITC[C])AAVDVEPPSK|C(ITC[C])AAVDVEPPSK|C(ITC[C])AAVDVEPPSK|C(ITC[C])AAVDVEPPSK|C(ITC[C])AAVDVEPPSK|C(ITC[C])AAVDVEPPSK	12|8|13|7|1|1|4|1	0.56|0.505|1.26|1.1|1.06|0.38|0.925|0.84	0.21815|0.15009|0.12978|0.25142|NA|NA|0.01291|NA	0.82875	0.31642	47	8
Q93009_315	USP7	UBP7_HUMAN Ubiquitin carboxyl-terminal hydrolase 7 OS=Homo sapiens OX=9606 GN=USP7 PE=1 SV=2	|C(ITC[C])VEGTIPK|C(ITC[C])VEGTIPK|C(ITC[C])VEGTIPK|C(ITC[C])VEGTIPK|C(ITC[C])VEGTIPK|C(ITC[C])VEGTIPK|C(ITC[C])VEGTIPK	|1|1|1|1|1|1|1	|0.41|0.88|1.0|0.88|0.81|0.83|0.99	|NA|NA|NA|NA|NA|NA|NA	0.82857	0.19845	7	7
P62826_120	RAN	RAN_HUMAN GTP-binding nuclear protein Ran OS=Homo sapiens OX=9606 GN=RAN PE=1 SV=3	|||VCENIPIVLC(ITC[C])GNK|VCENIPIVLC(ITC[C])GNK|||VCENIPIVLC(ITC[C])GNK	|||2|1|||1	|||0.635|0.98|||0.87	|||0.07778|NA|||NA	0.82833	0.17623	4	3
Q16637_289	SMN1	SMN_HUMAN Survival motor neuron protein OS=Homo sapiens OX=9606 GN=SMN1 PE=1 SV=1	|C(ITC[C])SHSLN|C(ITC[C])SHSLN|C(ITC[C])SHSLN|C(ITC[C])SHSLN|C(ITC[C])SHSLN|C(ITC[C])SHSLN|C(ITC[C])SHSLN	|1|2|2|4|2|2|2	|1.17|0.67|0.56|0.85|0.895|0.775|0.875	|NA|0.15556|0.02828|0.06928|0.03536|0.07778|0.13435	0.82786	0.19311	15	7
Q14566_242	MCM6	MCM6_HUMAN DNA replication licensing factor MCM6 OS=Homo sapiens OX=9606 GN=MCM6 PE=1 SV=1	C(ITC[C])DFTGTLIVVPDVSK|C(ITC[C])DFTGTLIVVPDVSK|C(ITC[C])DFTGTLIVVPDVSK|C(ITC[C])DFTGTLIVVPDVSK|C(ITC[C])DFTGTLIVVPDVSK|C(ITC[C])DFTGTLIVVPDVSK|C(ITC[C])DFTGTLIVVPDVSK|C(ITC[C])DFTGTLIVVPDVSK	1|3|1|1|1|3|3|1	0.85|0.83|0.82|0.76|0.88|1.0|1.27|0.21	NA|0.07638|NA|NA|NA|0.02309|0.16743|NA	0.8275	0.29635	14	8
O60216_392	RAD21	RAD21_HUMAN Double-strand-break repair protein rad21 homolog OS=Homo sapiens OX=9606 GN=RAD21 PE=1 SV=2	C(ITC[C])LTPLVPEDLR|C(ITC[C])LTPLVPEDLR|C(ITC[C])LTPLVPEDLR|C(ITC[C])LTPLVPEDLR|C(ITC[C])LTPLVPEDLR|C(ITC[C])LTPLVPEDLR|C(ITC[C])LTPLVPEDLR|C(ITC[C])LTPLVPEDLR	3|2|4|3|1|1|4|4	1.11|1.14|0.64|0.66|0.75|0.85|0.75|0.72	0.14731|0.05657|0.03464|0.03055|NA|NA|0.04509|0.01	0.8275	0.19448	22	8
Q9NR46_326	SH3GLB2	SHLB2_HUMAN Endophilin-B2 OS=Homo sapiens OX=9606 GN=SH3GLB2 PE=1 SV=1	||||C(ITC[C])LEEVAPPASGTR|C(ITC[C])LEEVAPPASGTR||C(ITC[C])LEEVAPPASGTR	||||1|2||1	||||0.82|0.65||1.01	||||NA|0.0||NA	0.82667	0.18009	4	3
Q5JVF3_25	PCID2	PCID2_HUMAN PCI domain-containing protein 2 OS=Homo sapiens OX=9606 GN=PCID2 PE=1 SV=2	|||C(ITC[C])AELVSFK|C(ITC[C])AELVSFK|||C(ITC[C])AELVSFK	|||1|1|||1	|||0.79|0.99|||0.7	|||NA|NA|||NA	0.82667	0.14844	3	3
Q15149_4245	PLEC	PLEC_HUMAN Plectin OS=Homo sapiens OX=9606 GN=PLEC PE=1 SV=3	C(ITC[C])ITDPQTGLCLLPLK||C(ITC[C])ITDPQTGLCLLPLK|C(ITC[C])ITDPQTGLCLLPLK|||C(ITC[C])ITDPQTGLCLLPLK|C(ITC[C])ITDPQTGLCLLPLK	1||1|1|||1|1	1.07||0.63|0.45|||0.95|1.03	NA||NA|NA|||NA|NA	0.826	0.27218	5	5
Q9BT78_255	COPS4	CSN4_HUMAN COP9 signalosome complex subunit 4 OS=Homo sapiens OX=9606 GN=COPS4 PE=1 SV=1	|C(ITC[C])QQLAAYGILEK|C(ITC[C])QQLAAYGILEK|C(ITC[C])QQLAAYGILEK||C(ITC[C])QQLAAYGILEK||C(ITC[C])QQLAAYGILEK	|1|1|2||2||1	|1.02|0.85|0.8||1.03||0.43	|NA|NA|0.15556||0.0||NA	0.826	0.24358	7	5
O00410_180	IPO5	IPO5_HUMAN Importin-5 OS=Homo sapiens OX=9606 GN=IPO5 PE=1 SV=4	|C(ITC[C])MQDQEHPSIR|C(ITC[C])MQDQEHPSIR|C(ITC[C])MQDQEHPSIR|C(ITC[C])MQDQEHPSIR|C(ITC[C])MQDQEHPSIR|C(ITC[C])MQDQEHPSIR|C(ITC[C])MQDQEHPSIR	|1|1|1|2|1|3|1	|1.28|0.54|0.56|0.65|0.78|1.18|0.79	|NA|NA|NA|0.0|NA|0.0|NA	0.82571	0.29393	10	7
Q96I24_460	FUBP3	FUBP3_HUMAN Far upstream element-binding protein 3 OS=Homo sapiens OX=9606 GN=FUBP3 PE=1 SV=2	C(ITC[C])FPNMAAK||C(ITC[C])FPNMAAK|C(ITC[C])FPNMAAK|||C(ITC[C])FPNMAAK|C(ITC[C])FPNMAAK	2||1|2|||3|2	1.06||0.78|0.655|||0.76|0.87	0.11314||NA|0.02121|||0.08386|0.02828	0.825	0.15199	10	5
Q9UBT7_667	CTNNAL1	CTNL1_HUMAN Alpha-catulin OS=Homo sapiens OX=9606 GN=CTNNAL1 PE=1 SV=2	|C(ITC[C])HQLQTVTK|C(ITC[C])HQLQTVTK|C(ITC[C])HQLQTVTK|C(ITC[C])HQLQTVTK|||	|1|1|1|4|||	|0.93|0.68|0.72|0.97|||	|NA|NA|NA|0.045|||	0.825	0.14617	7	4
P20073_298	ANXA7	ANXA7_HUMAN Annexin A7 OS=Homo sapiens OX=9606 GN=ANXA7 PE=1 SV=3	C(ITC[C])YQSEFGR|C(ITC[C])YQSEFGR|C(ITC[C])YQSEFGR||C(ITC[C])YQSEFGR|C(ITC[C])YQSEFGR|C(ITC[C])YQSEFGR|C(ITC[C])YQSEFGR	2|3|1||1|2|1|3	0.815|0.75|0.71||1.01|0.88|0.83|0.78	0.00707|0.00577|NA||NA|0.0|NA|0.03	0.825	0.09853	13	7
Q9C0C2_136	TNKS1BP1	TB182_HUMAN 182 kDa tankyrase-1-binding protein OS=Homo sapiens OX=9606 GN=TNKS1BP1 PE=1 SV=4	|C(ITC[C])AAPGGVR||C(ITC[C])AAPGGVR|C(ITC[C])AAPGGVR||C(ITC[C])AAPGGVR|C(ITC[C])AAPGGVR	|1||3|1||3|1	|0.48||1.03|0.63||1.02|0.96	|NA||0.18193|NA||0.08145|NA	0.824	0.25265	9	5
Q9NVN8_152	GNL3L	GNL3L_HUMAN Guanine nucleotide-binding protein-like 3-like protein OS=Homo sapiens OX=9606 GN=GNL3L PE=1 SV=1	C(ITC[C])FQMEEAVLR|C(ITC[C])FQMEEAVLR|C(ITC[C])FQMEEAVLR||C(ITC[C])FQMEEAVLR||C(ITC[C])FQMEEAVLR|C(ITC[C])FQMEEAVLR	1|2|2||1||1|1	0.83|0.855|0.795||1.07||0.65|0.74	NA|0.0495|0.09192||NA||NA|NA	0.82333	0.1412	8	6
Q9BU89_232	DOHH	DOHH_HUMAN Deoxyhypusine hydroxylase OS=Homo sapiens OX=9606 GN=DOHH PE=1 SV=1	||C(ITC[C])TENPMVR|||C(ITC[C])TENPMVR||C(ITC[C])TENPMVR	||1|||1||1	||0.98|||0.72||0.77	||NA|||NA||NA	0.82333	0.13796	3	3
Q9UPT9_386	USP22	UBP22_HUMAN Ubiquitin carboxyl-terminal hydrolase 22 OS=Homo sapiens OX=9606 GN=USP22 PE=1 SV=2	||||C(ITC[C])HSYQESTK|C(ITC[C])HSYQESTK||C(ITC[C])HSYQESTK	||||2|2||1	||||0.85|0.89||0.73	||||0.0|0.0||NA	0.82333	0.08327	5	3
Q9H223_141	EHD4	EHD4_HUMAN EH domain-containing protein 4 OS=Homo sapiens OX=9606 GN=EHD4 PE=1 SV=1	C(ITC[C])SQLPNQVLK|C(ITC[C])SQLPNQVLK|C(ITC[C])SQLPNQVLK|C(ITC[C])SQLPNQVLK|C(ITC[C])SQLPNQVLK|C(ITC[C])SQLPNQVLK|C(ITC[C])SQLPNQVLK|C(ITC[C])SQLPNQVLK	2|1|2|1|3|3|3|2	1.26|1.05|0.45|0.56|0.86|0.97|0.77|0.66	0.35355|NA|0.0|NA|0.02887|0.07024|0.05292|0.02828	0.8225	0.2681	17	8
P51858_12	HDGF	HDGF_HUMAN Hepatoma-derived growth factor OS=Homo sapiens OX=9606 GN=HDGF PE=1 SV=1	C(ITC[C])GDLVFAK|C(ITC[C])GDLVFAK|C(ITC[C])GDLVFAK|C(ITC[C])GDLVFAK|C(ITC[C])GDLVFAK|C(ITC[C])GDLVFAK|C(ITC[C])GDLVFAK|C(ITC[C])GDLVFAK	7|7|7|5|4|4|3|2	0.43|0.42|1.0|1.06|0.83|0.91|0.93|1.0	0.01345|0.01574|0.04756|0.03937|0.06807|0.05447|0.04041|0.01414	0.8225	0.25488	39	8
Q06210_620	GFPT1	GFPT1_HUMAN Glutamine--fructose-6-phosphate aminotransferase [isomerizing] 1 OS=Homo sapiens OX=9606 GN=GFPT1 PE=1 SV=3	|C(ITC[C])QNALQQVVAR|C(ITC[C])QNALQQVVAR|||C(ITC[C])QNALQQVVAR|C(ITC[C])QNALQQVVAR|C(ITC[C])QNALQQVVAR	|1|3|||1|1|1	|0.8|0.73|||0.87|0.92|0.79	|NA|0.02887|||NA|NA|NA	0.822	0.07396	7	5
P78527_703	PRKDC	PRKDC_HUMAN DNA-dependent protein kinase catalytic subunit OS=Homo sapiens OX=9606 GN=PRKDC PE=1 SV=3	||||C(ITC[C])FALFVK||C(ITC[C])FALFVK|C(ITC[C])FALFVK	||||2||2|1	||||0.98||0.755|0.73	||||0.05657||0.09192|NA	0.82167	0.13769	5	3
O00410_420	IPO5	IPO5_HUMAN Importin-5 OS=Homo sapiens OX=9606 GN=IPO5 PE=1 SV=4	||C(ITC[C])NAVGQMATDFAPGFQK|C(ITC[C])NAVGQMATDFAPGFQK||C(ITC[C])NAVGQMATDFAPGFQK|C(ITC[C])NAVGQMATDFAPGFQK|	||1|1||1|2|	||0.7|0.79||0.99|0.805|	||NA|NA||NA|0.20506|	0.82125	0.12168	5	4
O14654_1055	IRS4	IRS4_HUMAN Insulin receptor substrate 4 OS=Homo sapiens OX=9606 GN=IRS4 PE=1 SV=1	C(ITC[C])MDISLSPSR||C(ITC[C])MDISLSPSR|C(ITC[C])MDISLSPSR|C(ITC[C])MDISLSPSR|C(ITC[C])MDISLSPSR|C(ITC[C])MDISLSPSR|C(ITC[C])MDISLSPSR	1||1|1|5|3|4|3	1.27||0.52|0.48|1.03|0.96|0.755|0.73	NA||NA|NA|0.25466|0.69311|0.04349|0.01732	0.82071	0.28405	18	7
A0AVT1_581	UBA6	UBA6_HUMAN Ubiquitin-like modifier-activating enzyme 6 OS=Homo sapiens OX=9606 GN=UBA6 PE=1 SV=1	C(ITC[C])LANLRPLLDSGTMGTK|C(ITC[C])LANLRPLLDSGTMGTK|C(ITC[C])LANLRPLLDSGTMGTK|||C(ITC[C])LANLRPLLDSGTMGTK||	1|1|1|||1||	0.76|1.07|0.68|||0.77||	NA|NA|NA|||NA||	0.82	0.17146	4	4
P11586_236	MTHFD1	C1TC_HUMAN C-1-tetrahydrofolate synthase, cytoplasmic OS=Homo sapiens OX=9606 GN=MTHFD1 PE=1 SV=3	C(ITC[C])GINYVPDDK|C(ITC[C])GINYVPDDK|C(ITC[C])GINYVPDDK|C(ITC[C])GINYVPDDK|C(ITC[C])GINYVPDDK|||C(ITC[C])GINYVPDDK	3|1|2|2|3|||2	0.9|1.23|0.6|0.515|0.92|||0.75	0.05774|NA|0.01414|0.09192|0.04619|||0.0	0.81917	0.25722	13	6
O60341_360	KDM1A	KDM1A_HUMAN Lysine-specific histone demethylase 1A OS=Homo sapiens OX=9606 GN=KDM1A PE=1 SV=2	C(ITC[C])PLYEANGQAVPK|C(ITC[C])PLYEANGQAVPK|C(ITC[C])PLYEANGQAVPK|C(ITC[C])PLYEANGQAVPK||||	2|5|3|2||||	0.685|0.56|1.05|0.98||||	0.13435|0.10621|0.05508|0.05657||||	0.81875	0.23404	12	4
O75369_1617	FLNB	FLNB_HUMAN Filamin-B OS=Homo sapiens OX=9606 GN=FLNB PE=1 SV=2	C(ITC[C])LATGPGIASTVK|C(ITC[C])LATGPGIASTVK|C(ITC[C])LATGPGIASTVK|C(ITC[C])LATGPGIASTVK||||	4|2|4|4||||	0.66|0.73|0.92|0.965||||	0.045|0.11314|0.005|0.14526||||	0.81875	0.14688	14	4
Q8TEQ6_1477	GEMIN5	GEMI5_HUMAN Gem-associated protein 5 OS=Homo sapiens OX=9606 GN=GEMIN5 PE=1 SV=3	||C(ITC[C])LAQEMQQQAQELLQK|C(ITC[C])LAQEMQQQAQELLQK|C(ITC[C])LAQEMQQQAQELLQK|C(ITC[C])LAQEMQQQAQELLQK|C(ITC[C])LAQEMQQQAQELLQK|	||1|1|2|1|1|	||0.77|0.76|0.68|0.98|0.9|	||NA|NA|0.0|NA|NA|	0.818	0.12008	6	5
Q9NYZ3_198	GTSE1	GTSE1_HUMAN G2 and S phase-expressed protein 1 OS=Homo sapiens OX=9606 GN=GTSE1 PE=1 SV=3	C(ITC[C])TAHAASQAATQR|C(ITC[C])TAHAASQAATQR|C(ITC[C])TAHAASQAATQR|C(ITC[C])TAHAASQAATQR||||	1|4|3|1||||	0.8|0.96|0.75|0.76||||	NA|0.04619|0.18475|NA||||	0.8175	0.09743	9	4
Q8NGB8_83	OR4F15	O4F15_HUMAN Olfactory receptor 4F15 OS=Homo sapiens OX=9606 GN=OR4F15 PE=2 SV=1	LC(ITC[C])DLFK|IC(ITC[C])DIFK||IC(ITC[C])DIFK||||	1|1||1||||	0.94|0.97||0.54||||	NA|NA||NA||||	0.81667	0.24007	3	3
Q53EZ4_236	CEP55	CEP55_HUMAN Centrosomal protein of 55 kDa OS=Homo sapiens OX=9606 GN=CEP55 PE=1 SV=3	C(ITC[C])YNDLLASAK|C(ITC[C])YNDLLASAK|C(ITC[C])YNDLLASAK|C(ITC[C])YNDLLASAK|C(ITC[C])YNDLLASAK||C(ITC[C])YNDLLASAK|	2|1|3|1|1||1|	1.02|1.06|0.69|0.67|0.7||0.76|	0.04243|NA|0.05774|NA|NA||NA|	0.81667	0.17603	9	6
Q9UBX3_23	SLC25A10	DIC_HUMAN Mitochondrial dicarboxylate carrier OS=Homo sapiens OX=9606 GN=SLC25A10 PE=1 SV=2	||||C(ITC[C])THPLDLLK|C(ITC[C])THPLDLLK|C(ITC[C])THPLDLLK|C(ITC[C])THPLDLLK	||||4|1|2|1	||||0.925|1.09|0.61|0.64	||||0.10083|NA|0.11314|NA	0.81625	0.23121	8	4
O75794_212	CDC123	CD123_HUMAN Cell division cycle protein 123 homolog OS=Homo sapiens OX=9606 GN=CDC123 PE=1 SV=1	C(ITC[C])IQDFFK|C(ITC[C])IQDFFK|C(ITC[C])IQDFFK|C(ITC[C])IQDFFK|C(ITC[C])IQDFFK|C(ITC[C])IQDFFK|C(ITC[C])IQDFFK|C(ITC[C])IQDFFK	4|3|4|2|1|1|3|4	0.715|0.76|0.76|0.775|0.96|0.94|0.87|0.75	0.12028|0.02082|0.07089|0.02121|NA|NA|0.02082|0.02	0.81625	0.09376	22	8
Q14166_361	TTLL12	TTL12_HUMAN Tubulin--tyrosine ligase-like protein 12 OS=Homo sapiens OX=9606 GN=TTLL12 PE=1 SV=2	|||C(ITC[C])ENLLTVK|C(ITC[C])ENLLTVK|C(ITC[C])ENLLTVK|C(ITC[C])ENLLTVK|C(ITC[C])ENLLTVK	|||1|4|1|2|2	|||0.49|1.07|1.14|0.735|0.64	|||NA|0.025|NA|0.02121|0.04243	0.815	0.27987	10	5
Q14204_3940	DYNC1H1	DYHC1_HUMAN Cytoplasmic dynein 1 heavy chain 1 OS=Homo sapiens OX=9606 GN=DYNC1H1 PE=1 SV=5	||C(ITC[C])LPAFK|C(ITC[C])LPAFK|C(ITC[C])LPAFK|C(ITC[C])LPAFK|C(ITC[C])LPAFK|C(ITC[C])LPAFK	||2|2|4|3|4|6	||0.78|0.725|0.925|0.9|0.765|0.795	||0.01414|0.00707|0.04573|0.07937|0.04933|0.03347	0.815	0.07944	21	6
O00411_319	POLRMT	RPOM_HUMAN DNA-directed RNA polymerase, mitochondrial OS=Homo sapiens OX=9606 GN=POLRMT PE=1 SV=2	||C(ITC[C])LEQMSQEGLK|C(ITC[C])LEQMSQEGLK||||C(ITC[C])LEQMSQEGLK	||2|1||||1	||0.93|0.58||||0.93	||0.04243|NA||||NA	0.81333	0.20207	4	3
Q14318_295	FKBP8	FKBP8_HUMAN Peptidyl-prolyl cis-trans isomerase FKBP8 OS=Homo sapiens OX=9606 GN=FKBP8 PE=1 SV=2	||C(ITC[C])SLVLEHQPDNIK|C(ITC[C])SLVLEHQPDNIK|SC(ITC[C])SLVLEHQPDNIK C(ITC[C])SLVLEHQPDNIK||C(ITC[C])SLVLEHQPDNIK|C(ITC[C])SLVLEHQPDNIK	||1|2|3||1|2	||0.54|0.645|1.1||0.87|0.91	||NA|0.03536|0.05196||NA|0.0	0.813	0.22236	9	5
Q96DI7_291	SNRNP40	SNR40_HUMAN U5 small nuclear ribonucleoprotein 40 kDa protein OS=Homo sapiens OX=9606 GN=SNRNP40 PE=1 SV=1	C(ITC[C])SWSPDGSK|C(ITC[C])SWSPDGSK|C(ITC[C])SWSPDGSK|C(ITC[C])SWSPDGSK||||C(ITC[C])SWSPDGSK	1|1|2|1||||1	0.89|0.8|0.725|0.82||||0.83	NA|NA|0.12021|NA||||NA	0.813	0.05954	6	5
P67775_269	PPP2CA	PP2AA_HUMAN Serine/threonine-protein phosphatase 2A catalytic subunit alpha isoform OS=Homo sapiens OX=9606 GN=PPP2CA PE=1 SV=1	C(ITC[C])GNQAAIMELDDTLK|C(ITC[C])GNQAAIMELDDTLK|C(ITC[C])GNQAAIMELDDTLK|C(ITC[C])GNQAAIMELDDTLK|C(ITC[C])GNQAAIMELDDTLK|C(ITC[C])GNQAAIMELDDTLK|C(ITC[C])GNQAAIMELDDTLK|	3|5|2|6|2|2|2|	0.76|0.69|0.925|0.98|0.82|0.76|0.75|	0.18148|0.22532|0.13435|0.09827|0.18385|0.0|0.01414|	0.81214	0.10424	22	7
P53618_248	COPB1	COPB_HUMAN Coatomer subunit beta OS=Homo sapiens OX=9606 GN=COPB1 PE=1 SV=3	C(ITC[C])IYNLLQSSSPAVK|C(ITC[C])IYNLLQSSSPAVK|C(ITC[C])IYNLLQSSSPAVK|C(ITC[C])IYNLLQSSSPAVK|C(ITC[C])IYNLLQSSSPAVK|C(ITC[C])IYNLLQSSSPAVK|C(ITC[C])IYNLLQSSSPAVK|C(ITC[C])IYNLLQSSSPAVK	6|5|5|4|1|1|3|3	0.54|0.51|1.05|0.94|0.68|0.84|0.91|1.02	0.04967|0.04147|0.26726|0.04123|NA|NA|0.05774|0.29501	0.81125	0.2102	28	8
Q9H8H0_368	NOL11	NOL11_HUMAN Nucleolar protein 11 OS=Homo sapiens OX=9606 GN=NOL11 PE=1 SV=1	|C(ITC[C])GLGFQNSEQSR|C(ITC[C])GLGFQNSEQSR|C(ITC[C])GLGFQNSEQSR||C(ITC[C])GLGFQNSEQSR||	|1|1|1||3||	|0.74|0.81|0.71||0.98||	|NA|NA|NA||0.07506||	0.81	0.12083	6	4
Q9Y3B3_151	TMED7	TMED7_HUMAN Transmembrane emp24 domain-containing protein 7 OS=Homo sapiens OX=9606 GN=TMED7 PE=1 SV=2	||||C(ITC[C])VSIHEALK|C(ITC[C])VSIHEALK|C(ITC[C])VSIHEALK|C(ITC[C])VSIHEALK	||||2|1|4|1	||||0.93|0.7|0.855|0.75	||||0.01414|NA|0.19849|NA	0.80875	0.10347	8	4
Q6GMV1_92	ALG1L	ALG1L_HUMAN Putative glycosyltransferase ALG1-like OS=Homo sapiens OX=9606 GN=ALG1L PE=2 SV=2	||C(ITC[C])LHELVK|C(ITC[C])LHELVK|C(ITC[C])LHELVK||C(ITC[C])LHELVK|	||1|1|1||1|	||0.58|0.78|0.86||1.01|	||NA|NA|NA||NA|	0.8075	0.17914	4	4
Q14204_1888	DYNC1H1	DYHC1_HUMAN Cytoplasmic dynein 1 heavy chain 1 OS=Homo sapiens OX=9606 GN=DYNC1H1 PE=1 SV=5	C(ITC[C])YLTMTQALEAR|C(ITC[C])YLTMTQALEAR|C(ITC[C])YLTMTQALEAR|C(ITC[C])YLTMTQALEAR|C(ITC[C])YLTMTQALEAR|C(ITC[C])YLTMTQALEAR|C(ITC[C])YLTMTQALEAR|C(ITC[C])YLTMTQALEAR	4|2|1|2|2|1|3|1	0.98|0.935|0.66|0.705|0.79|0.89|0.73|0.77	0.14549|0.10607|NA|0.03536|0.0|NA|0.10392|NA	0.8075	0.11514	16	8
Q8WYP5_1261	AHCTF1	ELYS_HUMAN Protein ELYS OS=Homo sapiens OX=9606 GN=AHCTF1 PE=1 SV=3	||C(ITC[C])AVPVETEWLK|C(ITC[C])AVPVETEWLK|||C(ITC[C])AVPVETEWLK|	||1|1|||2|	||0.88|0.78|||0.76|	||NA|NA|||0.0|	0.80667	0.06429	4	3
Q9UGU0_1163	TCF20	TCF20_HUMAN Transcription factor 20 OS=Homo sapiens OX=9606 GN=TCF20 PE=1 SV=3	C(ITC[C])LMSSDGLPNK||C(ITC[C])LMSSDGLPNK|C(ITC[C])LMSSDGLPNK||||	1||1|3||||	0.75||0.82|0.85||||	NA||NA|0.15011||||	0.80667	0.05132	5	3
P62633_57	CNBP	CNBP_HUMAN Cellular nucleic acid-binding protein OS=Homo sapiens OX=9606 GN=CNBP PE=1 SV=1	C(ITC[C])GESGHLAK|||C(ITC[C])GESGHLAK|||C(ITC[C])GESGHLAK|C(ITC[C])GESGHLAK	2|||2|||1|2	0.35|||0.86|||1.05|0.96	0.14142|||0.0|||NA|0.0	0.805	0.3131	7	4
Q14839_1018	CHD4	CHD4_HUMAN Chromodomain-helicase-DNA-binding protein 4 OS=Homo sapiens OX=9606 GN=CHD4 PE=1 SV=2	||C(ITC[C])CNHPYLFPVAAMEAPK||C(ITC[C])CNHPYLFPVAAMEAPK|C(ITC[C])CNHPYLFPVAAMEAPK|C(ITC[C])CNHPYLFPVAAMEAPK|	||1||1|3|1|	||0.48||0.68|1.08|0.98|	||NA||NA|0.04|NA|	0.805	0.27538	6	4
Q9Y4B4_533	RAD54L2	ARIP4_HUMAN Helicase ARIP4 OS=Homo sapiens OX=9606 GN=RAD54L2 PE=1 SV=4	|||C(ITC[C])IDSTPQDVR|C(ITC[C])IDSTPQDVR|||C(ITC[C])IDSTPQDVR	|||1|1|||1	|||0.69|0.68|||1.04	|||NA|NA|||NA	0.80333	0.20502	3	3
Q92990_36	GLMN	GLMN_HUMAN Glomulin OS=Homo sapiens OX=9606 GN=GLMN PE=1 SV=2	||C(ITC[C])IEEGHTDQLLEIIQNEK|C(ITC[C])IEEGHTDQLLEIIQNEK||C(ITC[C])IEEGHTDQLLEIIQNEK|C(ITC[C])IEEGHTDQLLEIIQNEK|C(ITC[C])IEEGHTDQLLEIIQNEK	||1|1||1|1|2	||0.55|0.87||1.1|0.69|0.805	||NA|NA||NA|NA|0.47376	0.803	0.20584	6	5
Q9Y490_1353	TLN1	TLN1_HUMAN Talin-1 OS=Homo sapiens OX=9606 GN=TLN1 PE=1 SV=3	C(ITC[C])TQQAPGQK|||C(ITC[C])TQQAPGQK||C(ITC[C])TQQAPGQK|C(ITC[C])TQQAPGQK|	3|||3||2|1|	0.39|||0.94||0.79|1.09|	0.01732|||0.57457||0.0|NA|	0.8025	0.30104	9	4
O14966_127	RAB29	RAB7L_HUMAN Ras-related protein Rab-7L1 OS=Homo sapiens OX=9606 GN=RAB29 PE=1 SV=1	|C(ITC[C])DLSPWAVSR||C(ITC[C])DLSPWAVSR|C(ITC[C])DLSPWAVSR|C(ITC[C])DLSPWAVSR|C(ITC[C])DLSPWAVSR|C(ITC[C])DLSPWAVSR	|1||1|2|2|2|1	|0.8||0.61|0.98|1.0|0.785|0.64	|NA||NA|0.01414|0.0|0.00707|NA	0.8025	0.16388	9	6
P39748_182	FEN1	FEN1_HUMAN Flap endonuclease 1 OS=Homo sapiens OX=9606 GN=FEN1 PE=1 SV=1	|C(ITC[C])LTFGSPVLMR|C(ITC[C])LTFGSPVLMR|C(ITC[C])LTFGSPVLMR|C(ITC[C])LTFGSPVLMR|C(ITC[C])LTFGSPVLMR|C(ITC[C])LTFGSPVLMR|C(ITC[C])LTFGSPVLMR	|3|2|2|1|2|2|5	|1.15|0.535|0.485|0.95|0.76|1.02|0.7	|0.27683|0.02121|0.02121|NA|0.12728|0.52326|0.1339	0.8	0.24982	17	7
Q99613_79	EIF3C	EIF3C_HUMAN Eukaryotic translation initiation factor 3 subunit C OS=Homo sapiens OX=9606 GN=EIF3C PE=1 SV=1	C(ITC[C])LEEFELLGK|C(ITC[C])LEEFELLGK|C(ITC[C])LEEFELLGK|C(ITC[C])LEEFELLGK|C(ITC[C])LEEFELLGK|C(ITC[C])LEEFELLGK||	2|1|3|2|1|1||	0.56|0.55|1.1|0.82|0.99|0.78||	0.08485|NA|0.21939|0.0|NA|NA||	0.8	0.22226	10	6
P34932_34	HSPA4	HSP74_HUMAN Heat shock 70 kDa protein 4 OS=Homo sapiens OX=9606 GN=HSPA4 PE=1 SV=4	C(ITC[C])TPACISFGPK|C(ITC[C])TPACISFGPK|C(ITC[C])TPACISFGPK|C(ITC[C])TPACISFGPK|C(ITC[C])TPACISFGPK|C(ITC[C])TPACISFGPK|C(ITC[C])TPACISFGPK|C(ITC[C])TPACISFGPK	9|9|11|7|6|6|6|7	0.56|0.53|0.92|0.94|0.795|0.84|0.94|0.87	0.01658|0.02619|0.11138|0.02299|0.02429|0.04401|0.04546|0.05314	0.79938	0.16502	61	8
Q9HD26_20	GOPC	GOPC_HUMAN Golgi-associated PDZ and coiled-coil motif-containing protein OS=Homo sapiens OX=9606 GN=GOPC PE=1 SV=1	C(ITC[C])SVGAPGGVSMFR|C(ITC[C])SVGAPGGVSMFR|C(ITC[C])SVGAPGGVSMFR|C(ITC[C])SVGAPGGVSMFR|C(ITC[C])SVGAPGGVSMFR||C(ITC[C])SVGAPGGVSMFR|C(ITC[C])SVGAPGGVSMFR	1|2|1|2|1||3|2	0.52|0.77|0.61|0.695|1.07||1.0|0.93	NA|0.96167|NA|0.0495|NA||0.04041|0.22627	0.79929	0.20665	12	7
Q9HCN8_100	SDF2L1	SDF2L_HUMAN Stromal cell-derived factor 2-like protein 1 OS=Homo sapiens OX=9606 GN=SDF2L1 PE=1 SV=2	|||C(ITC[C])GQAVR||C(ITC[C])GQAVR|C(ITC[C])GQAVR|C(ITC[C])GQAVR	|||3||2|1|1	|||0.58||1.0|0.59|1.02	|||0.02646||0.0|NA|NA	0.7975	0.24554	7	4
O43175_295	PHGDH	SERA_HUMAN D-3-phosphoglycerate dehydrogenase OS=Homo sapiens OX=9606 GN=PHGDH PE=1 SV=4	C(ITC[C])GEEIAVQFVDMVK|C(ITC[C])GEEIAVQFVDMVK|C(ITC[C])GEEIAVQFVDMVK|C(ITC[C])GEEIAVQFVDMVK|C(ITC[C])GEEIAVQFVDMVK|C(ITC[C])GEEIAVQFVDMVK|C(ITC[C])GEEIAVQFVDMVK|C(ITC[C])GEEIAVQFVDMVK	11|14|8|8|4|2|8|3	0.87|0.84|0.78|0.935|0.76|0.74|0.695|0.76	0.12562|0.10166|0.04809|0.12829|0.09032|0.0|0.13228|0.06807	0.7975	0.07829	58	8
P21912_68	SDHB	SDHB_HUMAN Succinate dehydrogenase [ubiquinone] iron-sulfur subunit, mitochondrial OS=Homo sapiens OX=9606 GN=SDHB PE=1 SV=3	C(ITC[C])GPMVLDALIK|C(ITC[C])GPMVLDALIK|C(ITC[C])GPMVLDALIK|C(ITC[C])GPMVLDALIK|C(ITC[C])GPMVLDALIK|C(ITC[C])GPMVLDALIK|C(ITC[C])GPMVLDALIK|C(ITC[C])GPMVLDALIK	16|13|10|8|9|5|7|9	0.675|0.61|0.89|0.88|0.89|0.8|0.83|0.8	0.1009|0.168|0.0405|0.06503|0.0614|0.07071|0.03891|0.02991	0.79688	0.10361	77	8
P27348_94	YWHAQ	1433T_HUMAN 14-3-3 protein theta OS=Homo sapiens OX=9606 GN=YWHAQ PE=1 SV=1	C(ITC[C])TTVLELLDK||||C(ITC[C])TTVLELLDK|C(ITC[C])TTVLELLDK||C(ITC[C])TTVLELLDK	2||||1|1||1	0.875||||0.74|0.68||0.89	0.17678||||NA|NA||NA	0.79625	0.10274	5	4
Q96AE4_332	FUBP1	FUBP1_HUMAN Far upstream element-binding protein 1 OS=Homo sapiens OX=9606 GN=FUBP1 PE=1 SV=3	C(ITC[C])QHAAEIITDLLR|C(ITC[C])QHAAEIITDLLR||C(ITC[C])QHAAEIITDLLR|C(ITC[C])QHAAEIITDLLR|C(ITC[C])QHAAEIITDLLR|C(ITC[C])QHAAEIITDLLR|	3|1||2|3|1|1|	0.59|0.43||0.97|1.11|0.89|0.77|	0.0|NA||0.15556|0.0|NA|NA|	0.79333	0.25089	11	6
O14654_206	IRS4	IRS4_HUMAN Insulin receptor substrate 4 OS=Homo sapiens OX=9606 GN=IRS4 PE=1 SV=1	C(ITC[C])GTLGAQPDGEPAALAAAAAAEPPFYK|C(ITC[C])GTLGAQPDGEPAALAAAAAAEPPFYK|C(ITC[C])GTLGAQPDGEPAALAAAAAAEPPFYK|C(ITC[C])GTLGAQPDGEPAALAAAAAAEPPFYK|C(ITC[C])GTLGAQPDGEPAALAAAAAAEPPFYK|C(ITC[C])GTLGAQPDGEPAALAAAAAAEPPFYK|C(ITC[C])GTLGAQPDGEPAALAAAAAAEPPFYK|C(ITC[C])GTLGAQPDGEPAALAAAAAAEPPFYK	7|6|3|3|1|1|2|3	0.86|0.865|0.71|0.7|0.77|0.92|0.725|0.79	0.08902|0.05715|0.01528|0.02517|NA|NA|0.07778|0.01528	0.7925	0.0815	26	8
P78527_1229	PRKDC	PRKDC_HUMAN DNA-dependent protein kinase catalytic subunit OS=Homo sapiens OX=9606 GN=PRKDC PE=1 SV=3	C(ITC[C])GQPSGILAQPTLLYLR|||C(ITC[C])GQPSGILAQPTLLYLR|C(ITC[C])GQPSGILAQPTLLYLR|C(ITC[C])GQPSGILAQPTLLYLR|C(ITC[C])GQPSGILAQPTLLYLR|C(ITC[C])GQPSGILAQPTLLYLR	1|||3|1|1|4|1	0.84|||0.69|0.96|0.93|0.655|0.67	NA|||0.21008|NA|NA|0.02887|NA	0.79083	0.13684	11	6
Q9Y383_44	LUC7L2	LC7L2_HUMAN Putative RNA-binding protein Luc7-like 2 OS=Homo sapiens OX=9606 GN=LUC7L2 PE=1 SV=2	||C(ITC[C])PHDVLSGTR|C(ITC[C])PHDVLSGTR|||C(ITC[C])PHDVLSGTR|C(ITC[C])PHDVLSGTR	||1|2|||3|1	||0.79|0.805|||0.83|0.73	||NA|0.00707|||0.09644|NA	0.78875	0.0425	7	4
P23526_421	AHCY	SAHH_HUMAN Adenosylhomocysteinase OS=Homo sapiens OX=9606 GN=AHCY PE=1 SV=4	C(ITC[C])DGPFKPDHYR|C(ITC[C])DGPFKPDHYR|C(ITC[C])DGPFKPDHYR||C(ITC[C])DGPFKPDHYR||C(ITC[C])DGPFKPDHYR|C(ITC[C])DGPFKPDHYR	5|4|3||1||1|4	0.46|0.475|1.09||0.88||0.9|0.925	0.07823|0.03742|0.08888||NA||NA|0.04243	0.78833	0.25944	18	6
Q9BQ75_55	CMSS1	CMS1_HUMAN Protein CMSS1 OS=Homo sapiens OX=9606 GN=CMSS1 PE=1 SV=2	||C(ITC[C])FLIQPK||C(ITC[C])FLIQPK|C(ITC[C])FLIQPK|C(ITC[C])FLIQPK|C(ITC[C])FLIQPK	||1||1|1|2|1	||0.86||0.63|0.72|0.85|0.88	||NA||NA|NA|0.16971|NA	0.788	0.10849	6	5
Q9NW13_33	RBM28	RBM28_HUMAN RNA-binding protein 28 OS=Homo sapiens OX=9606 GN=RBM28 PE=1 SV=3	C(ITC[C])FVVTEK||C(ITC[C])FVVTEK|C(ITC[C])FVVTEK|C(ITC[C])FVVTEK|C(ITC[C])FVVTEK|C(ITC[C])FVVTEK|C(ITC[C])FVVTEK	1||1|1|2|2|2|2	0.84||0.63|0.74|0.94|0.83|0.745|0.785	NA||NA|NA|0.01414|0.04243|0.00707|0.03536	0.78714	0.0972	11	7
O14617_574	AP3D1	AP3D1_HUMAN AP-3 complex subunit delta-1 OS=Homo sapiens OX=9606 GN=AP3D1 PE=1 SV=1	C(ITC[C])ILQLVK|C(ITC[C])ILQLVK|C(ITC[C])ILQLVK|C(ITC[C])ILQLVK|C(ITC[C])ILQLVK|C(ITC[C])ILQLVK|C(ITC[C])ILQLVK|C(ITC[C])ILQLVK	2|1|3|2|1|3|2|4	0.76|1.01|0.61|0.66|0.91|0.87|0.72|0.745	0.77782|NA|0.04041|0.0|NA|0.03512|0.01414|0.10677	0.78563	0.13426	18	8
O14524_434	NEMP1	NEMP1_HUMAN Nuclear envelope integral membrane protein 1 OS=Homo sapiens OX=9606 GN=NEMP1 PE=1 SV=2	|C(ITC[C])PAITQNNFLT|C(ITC[C])PAITQNNFLT|C(ITC[C])PAITQNNFLT||||	|1|1|2||||	|0.91|0.69|0.755||||	|NA|NA|0.0495||||	0.785	0.11303	4	3
P27540_269	ARNT	ARNT_HUMAN Aryl hydrocarbon receptor nuclear translocator OS=Homo sapiens OX=9606 GN=ARNT PE=1 SV=1	C(ITC[C])GSSSVDPVSVNR|||C(ITC[C])GSSSVDPVSVNR||||C(ITC[C])GSSSVDPVSVNR	1|||1||||2	0.69|||0.85||||0.815	NA|||NA||||0.02121	0.785	0.08411	4	3
P35579_91	MYH9	MYH9_HUMAN Myosin-9 OS=Homo sapiens OX=9606 GN=MYH9 PE=1 SV=4	||C(ITC[C])LNEASVLHNLK|C(ITC[C])LNEASVLHNLK|||C(ITC[C])LNEASVLHNLK|C(ITC[C])LNEASVLHNLK	||4|5|||5|4	||0.73|0.7|||0.87|0.835	||0.04546|0.06907|||0.05891|0.06976	0.78375	0.08159	18	4
Q9Y6K1_710	DNMT3A	DNM3A_HUMAN DNA (cytosine-5)-methyltransferase 3A OS=Homo sapiens OX=9606 GN=DNMT3A PE=1 SV=4	||C(ITC[C])NDLSIVNPAR||||C(ITC[C])NDLSIVNPAR|C(ITC[C])NDLSIVNPAR	||1||||1|1	||0.51||||0.95|0.89	||NA||||NA|NA	0.78333	0.23861	3	3
P51610_1886	HCFC1	HCFC1_HUMAN Host cell factor 1 OS=Homo sapiens OX=9606 GN=HCFC1 PE=1 SV=2	|||C(ITC[C])LPGFPGAPCAIK|||C(ITC[C])LPGFPGAPCAIK|C(ITC[C])LPGFPGAPCAIK	|||1|||1|1	|||0.64|||0.73|0.98	|||NA|||NA|NA	0.78333	0.17616	3	3
Q14694_456	USP10	UBP10_HUMAN Ubiquitin carboxyl-terminal hydrolase 10 OS=Homo sapiens OX=9606 GN=USP10 PE=1 SV=2	||C(ITC[C])TSTPMIDSFVR|C(ITC[C])TSTPMIDSFVR||C(ITC[C])TSTPMIDSFVR|C(ITC[C])TSTPMIDSFVR|C(ITC[C])TSTPMIDSFVR	||2|3||1|1|2	||0.58|0.72||0.88|0.81|0.925	||0.01414|0.08505||NA|NA|0.16263	0.783	0.13737	9	5
P25205_123	MCM3	MCM3_HUMAN DNA replication licensing factor MCM3 OS=Homo sapiens OX=9606 GN=MCM3 PE=1 SV=3	||C(ITC[C])VVCVEGIVTK|C(ITC[C])VVCVEGIVTK|C(ITC[C])VVCVEGIVTK||C(ITC[C])VVCVEGIVTK|C(ITC[C])VVCVEGIVTK	||1|1|2||1|1	||0.5|0.8|1.07||0.83|0.71	||NA|NA|0.09899||NA|NA	0.782	0.20632	6	5
P13639_651	EEF2	EF2_HUMAN Elongation factor 2 OS=Homo sapiens OX=9606 GN=EEF2 PE=1 SV=4	|C(ITC[C])FGPDGTGPNILTDITK|C(ITC[C])FGPDGTGPNILTDITK|C(ITC[C])FGPDGTGPNILTDITK||C(ITC[C])FGPDGTGPNILTDITK|C(ITC[C])FGPDGTGPNILTDITK|C(ITC[C])FGPDGTGPNILTDITK	|1|1|3||1|1|1	|0.43|0.88|0.94||0.74|0.84|0.86	|NA|NA|0.1833||NA|NA|NA	0.78167	0.18422	8	6
Q13042_544	CDC16	CDC16_HUMAN Cell division cycle protein 16 homolog OS=Homo sapiens OX=9606 GN=CDC16 PE=1 SV=2	|C(ITC[C])YDFDVHTMK|C(ITC[C])YDFDVHTMK|C(ITC[C])YDFDVHTMK||||	|1|2|1||||	|1.11|0.67|0.56||||	|NA|0.08485|NA||||	0.78	0.29103	4	3
Q9Y3P9_346	RABGAP1	RBGP1_HUMAN Rab GTPase-activating protein 1 OS=Homo sapiens OX=9606 GN=RABGAP1 PE=1 SV=3	C(ITC[C])FGLLLSPGK|C(ITC[C])FGLLLSPGK|C(ITC[C])FGLLLSPGK|C(ITC[C])FGLLLSPGK|C(ITC[C])FGLLLSPGK|C(ITC[C])FGLLLSPGK|C(ITC[C])FGLLLSPGK|C(ITC[C])FGLLLSPGK	1|1|2|1|2|2|1|2	0.7|0.83|0.66|0.77|1.22|0.63|0.61|0.82	NA|NA|0.0|NA|0.39598|0.0|NA|0.07071	0.78	0.1964	12	8
P40261_50	NNMT	NNMT_HUMAN Nicotinamide N-methyltransferase OS=Homo sapiens OX=9606 GN=NNMT PE=1 SV=1	||FC(ITC[C])LDGVK||FC(ITC[C])LDGVK|||FC(ITC[C])LDGVK	||1||1|||1	||0.64||0.96|||0.74	||NA||NA|||NA	0.78	0.16371	3	3
Q8TCG1_445	CIP2A	CIP2A_HUMAN Protein CIP2A OS=Homo sapiens OX=9606 GN=CIP2A PE=1 SV=2	|||C(ITC[C])TTLIEQQFTYGK|C(ITC[C])TTLIEQQFTYGK||C(ITC[C])TTLIEQQFTYGK|	|||1|1||1|	|||0.62|0.94||0.77|	|||NA|NA||NA|	0.77667	0.1601	3	3
Q8TEX9_42	IPO4	IPO4_HUMAN Importin-4 OS=Homo sapiens OX=9606 GN=IPO4 PE=1 SV=2	||C(ITC[C])DLLASAADPQIR|C(ITC[C])DLLASAADPQIR|C(ITC[C])DLLASAADPQIR|C(ITC[C])DLLASAADPQIR|C(ITC[C])DLLASAADPQIR|C(ITC[C])DLLASAADPQIR	||3|2|2|1|1|2	||0.77|0.76|0.92|0.91|0.7|0.6	||0.05508|0.08485|0.05657|NA|NA|0.04243	0.77667	0.12307	11	6
Q9NS91_64	RAD18	RAD18_HUMAN E3 ubiquitin-protein ligase RAD18 OS=Homo sapiens OX=9606 GN=RAD18 PE=1 SV=2	||C(ITC[C])VTVTEPDLK||||C(ITC[C])VTVTEPDLK|C(ITC[C])VTVTEPDLK	||1||||2|1	||0.81||||0.87|0.65	||NA||||0.0|NA	0.77667	0.11372	4	3
Q9Y5P6_245	GMPPB	GMPPB_HUMAN Mannose-1-phosphate guanyltransferase beta OS=Homo sapiens OX=9606 GN=GMPPB PE=1 SV=2	C(ITC[C])SGPGIVGNVLVDPSAR|C(ITC[C])SGPGIVGNVLVDPSAR|C(ITC[C])SGPGIVGNVLVDPSAR|C(ITC[C])SGPGIVGNVLVDPSAR|||C(ITC[C])SGPGIVGNVLVDPSAR|	1|1|1|1|||1|	0.97|1.0|0.71|0.58|||0.62|	NA|NA|NA|NA|||NA|	0.776	0.1968	5	5
Q00839_497	HNRNPU	HNRPU_HUMAN Heterogeneous nuclear ribonucleoprotein U OS=Homo sapiens OX=9606 GN=HNRNPU PE=1 SV=6	C(ITC[C])EVVMMIGLPGAGK|C(ITC[C])EVVMMIGLPGAGK|C(ITC[C])EVVMMIGLPGAGK|C(ITC[C])EVVMMIGLPGAGK|C(ITC[C])EVVMMIGLPGAGK|C(ITC[C])EVVMMIGLPGAGK|C(ITC[C])EVVMMIGLPGAGK|C(ITC[C])EVVMMIGLPGAGK	4|5|6|4|6|2|7|3	0.66|0.7|0.72|0.675|1.015|0.835|0.8|0.8	1.97308|0.30427|0.11754|0.06976|0.11017|0.2192|0.15587|0.18083	0.77562	0.11608	37	8
Q92598_34	HSPH1	HS105_HUMAN Heat shock protein 105 kDa OS=Homo sapiens OX=9606 GN=HSPH1 PE=1 SV=1	C(ITC[C])TPSVISFGSK|C(ITC[C])TPSVISFGSK|C(ITC[C])TPSVISFGSK|C(ITC[C])TPSVISFGSK|C(ITC[C])TPSVISFGSK|C(ITC[C])TPSVISFGSK|C(ITC[C])TPSVISFGSK|C(ITC[C])TPSVISFGSK	4|4|6|6|3|3|3|3	0.6|0.545|0.89|0.92|0.85|0.82|0.79|0.78	0.04123|0.23338|0.02805|0.09812|0.07234|0.00577|0.01155|0.04041	0.77438	0.13399	32	8
Q9UG63_486	ABCF2	ABCF2_HUMAN ATP-binding cassette sub-family F member 2 OS=Homo sapiens OX=9606 GN=ABCF2 PE=1 SV=2	C(ITC[C])YPEIK|C(ITC[C])YPEIK|C(ITC[C])YPEIK|C(ITC[C])YPEIK||||	1|1|3|4||||	0.99|1.04|0.52|0.545||||	NA|NA|0.01732|0.01414||||	0.77375	0.2795	9	4
Q15366_109	PCBP2	PCBP2_HUMAN Poly(rC)-binding protein 2 OS=Homo sapiens OX=9606 GN=PCBP2 PE=1 SV=1	|||LVVPASQC(ITC[C])GSLIGK|LVVPASQC(ITC[C])GSLIGKGGCK LVVPASQC(ITC[C])GSLIGK||LVVPASQC(ITC[C])GSLIGK|LVVPASQC(ITC[C])GSLIGK	|||2|4||1|1	|||0.545|0.97||0.81|0.77	|||0.06364|0.14773||NA|NA	0.77375	0.17528	8	4
Q13155_306	AIMP2	AIMP2_HUMAN Aminoacyl tRNA synthase complex-interacting multifunctional protein 2 OS=Homo sapiens OX=9606 GN=AIMP2 PE=1 SV=2	|||C(ITC[C])ENLAPFNTALK||C(ITC[C])ENLAPFNTALK|C(ITC[C])ENLAPFNTALK|C(ITC[C])ENLAPFNTALK	|||2||1|2|2	|||0.625||0.93|0.815|0.725	|||0.03536||NA|0.02121|0.00707	0.77375	0.1299	7	4
P21333_810	FLNA	FLNA_HUMAN Filamin-A OS=Homo sapiens OX=9606 GN=FLNA PE=1 SV=4	C(ITC[C])APGVVGPAEADIDFDIIR|C(ITC[C])APGVVGPAEADIDFDIIR||C(ITC[C])APGVVGPAEADIDFDIIR|||C(ITC[C])APGVVGPAEADIDFDIIR|C(ITC[C])APGVVGPAEADIDFDIIR	5|1||1|||2|2	0.77|0.95||0.7|||0.96|0.475	0.09644|NA||NA|||0.0|0.55861	0.771	0.20026	11	5
P53985_400	SLC16A1	MOT1_HUMAN Monocarboxylate transporter 1 OS=Homo sapiens OX=9606 GN=SLC16A1 PE=1 SV=3	||C(ITC[C])PVLLGPPLLGR|C(ITC[C])PVLLGPPLLGR|C(ITC[C])PVLLGPPLLGR|C(ITC[C])PVLLGPPLLGR|C(ITC[C])PVLLGPPLLGR|C(ITC[C])PVLLGPPLLGR	||3|3|3|2|3|4	||0.52|0.51|1.01|1.01|0.82|0.75	||0.02517|0.03512|0.02646|0.02828|0.01|0.03948	0.77	0.2228	18	6
P09110_218	ACAA1	THIK_HUMAN 3-ketoacyl-CoA thiolase, peroxisomal OS=Homo sapiens OX=9606 GN=ACAA1 PE=1 SV=2	||||C(ITC[C])FQAEIVPVTTTVHDDK|C(ITC[C])FQAEIVPVTTTVHDDK||C(ITC[C])FQAEIVPVTTTVHDDK	||||2|1||1	||||0.54|0.93||0.84	||||0.0|NA||NA	0.77	0.20421	4	3
O43747_400	AP1G1	AP1G1_HUMAN AP-1 complex subunit gamma-1 OS=Homo sapiens OX=9606 GN=AP1G1 PE=1 SV=5	||C(ITC[C])ASGIFLAAEK|C(ITC[C])ASGIFLAAEK||C(ITC[C])ASGIFLAAEK||C(ITC[C])ASGIFLAAEK	||1|1||1||1	||0.85|0.69||0.79||0.75	||NA|NA||NA||NA	0.77	0.06733	4	4
Q13151_36	HNRNPA0	ROA0_HUMAN Heterogeneous nuclear ribonucleoprotein A0 OS=Homo sapiens OX=9606 GN=HNRNPA0 PE=1 SV=1	|C(ITC[C])VVVVNPQTK|||C(ITC[C])VVVVNPQTK|C(ITC[C])VVVVNPQTK|C(ITC[C])VVVVNPQTK|C(ITC[C])VVVVNPQTK	|1|||5|5|6|5	|0.82|||0.93|0.79|0.685|0.62	|NA|||0.09788|0.02387|0.07062|0.06693	0.769	0.12064	22	5
P53618_877	COPB1	COPB_HUMAN Coatomer subunit beta OS=Homo sapiens OX=9606 GN=COPB1 PE=1 SV=3	C(ITC[C])ITPEK|C(ITC[C])ITPEK|C(ITC[C])ITPEK|C(ITC[C])ITPEK|C(ITC[C])ITPEK|C(ITC[C])ITPEK|C(ITC[C])ITPEK|C(ITC[C])ITPEK	5|6|4|2|5|3|1|2	0.75|0.75|0.71|0.715|0.82|0.86|0.76|0.785	0.01643|0.01549|0.01155|0.02121|0.05079|0.06028|NA|0.00707	0.76875	0.05118	28	8
Q01433_230	AMPD2	AMPD2_HUMAN AMP deaminase 2 OS=Homo sapiens OX=9606 GN=AMPD2 PE=1 SV=2	C(ITC[C])GVPFTDLLDAAK|C(ITC[C])GVPFTDLLDAAK|C(ITC[C])GVPFTDLLDAAK||C(ITC[C])GVPFTDLLDAAK||C(ITC[C])GVPFTDLLDAAK|C(ITC[C])GVPFTDLLDAAK	4|4|1||2||1|1	0.385|0.405|1.08||0.88||0.92|0.94	0.00957|0.06131|NA||0.0||NA|NA	0.76833	0.297	13	6
Q9H4L4_243	SENP3	SENP3_HUMAN Sentrin-specific protease 3 OS=Homo sapiens OX=9606 GN=SENP3 PE=1 SV=2	||C(ITC[C])TLPNGFGGQSGPEGER|C(ITC[C])TLPNGFGGQSGPEGER|||C(ITC[C])TLPNGFGGQSGPEGER|	||1|1|||2|	||0.83|0.52|||0.95|	||NA|NA|||0.18385|	0.76667	0.22189	4	3
Q7L2E3_786	DHX30	DHX30_HUMAN ATP-dependent RNA helicase DHX30 OS=Homo sapiens OX=9606 GN=DHX30 PE=1 SV=1	C(ITC[C])QSGFAYHLFPR|C(ITC[C])QSGFAYHLFPR||C(ITC[C])QSGFAYHLFPR||||C(ITC[C])QSGFAYHLFPR	2|2||2||||1	0.665|0.555||0.97||||0.87	0.00707|0.03536||0.11314||||NA	0.765	0.18899	7	4
P09874_298	PARP1	PARP1_HUMAN Poly [ADP-ribose] polymerase 1 OS=Homo sapiens OX=9606 GN=PARP1 PE=1 SV=4	|||||C(ITC[C])SGQLVFK|C(ITC[C])SGQLVFK|C(ITC[C])SGQLVFK	|||||2|2|2	|||||0.78|0.775|0.74	|||||0.0|0.03536|0.0	0.765	0.02179	6	3
O75717_180	WDHD1	WDHD1_HUMAN WD repeat and HMG-box DNA-binding protein 1 OS=Homo sapiens OX=9606 GN=WDHD1 PE=1 SV=1	C(ITC[C])NDVINAK||C(ITC[C])NDVINAK|C(ITC[C])NDVINAK|||C(ITC[C])NDVINAK|C(ITC[C])NDVINAK	1||3|3|||1|1	0.55||0.92|0.82|||0.68|0.85	NA||0.09238|0.08505|||NA|NA	0.764	0.14809	9	5
Q9Y613_43	FHOD1	FHOD1_HUMAN FH1/FH2 domain-containing protein 1 OS=Homo sapiens OX=9606 GN=FHOD1 PE=1 SV=3	||C(ITC[C])SLDGALPLGAQIPAVHR|||C(ITC[C])SLDGALPLGAQIPAVHR|C(ITC[C])SLDGALPLGAQIPAVHR|C(ITC[C])SLDGALPLGAQIPAVHR	||2|||1|2|1	||0.5|||0.86|0.61|1.07	||0.0|||NA|0.0|NA	0.76	0.25573	6	4
O60841_749	EIF5B	IF2P_HUMAN Eukaryotic translation initiation factor 5B OS=Homo sapiens OX=9606 GN=EIF5B PE=1 SV=4	C(ITC[C])PFIVALNK|C(ITC[C])PFIVALNK|C(ITC[C])PFIVALNK|C(ITC[C])PFIVALNK|C(ITC[C])PFIVALNK|C(ITC[C])PFIVALNK|C(ITC[C])PFIVALNK|C(ITC[C])PFIVALNK	3|3|5|5|3|4|4|6	0.43|0.55|0.8|0.84|0.86|0.945|0.765|0.89	0.01732|0.03512|0.0728|0.07765|0.06928|0.07932|0.03367|0.1152	0.76	0.17815	33	8
Q12979_201	ABR	ABR_HUMAN Active breakpoint cluster region-related protein OS=Homo sapiens OX=9606 GN=ABR PE=1 SV=2	||C(ITC[C])SQSNNQFQK|C(ITC[C])SQSNNQFQK||C(ITC[C])SQSNNQFQK||	||3|2||1||	||0.69|0.795||0.79||	||0.01732|0.07778||NA||	0.75833	0.05923	6	3
Q9H840_121	GEMIN7	GEMI7_HUMAN Gem-associated protein 7 OS=Homo sapiens OX=9606 GN=GEMIN7 PE=1 SV=1	C(ITC[C])SDIISYTFKP|C(ITC[C])SDIISYTFKP|C(ITC[C])SDIISYTFKP|||||	1|1|2|||||	0.56|0.74|0.97|||||	NA|NA|0.38184|||||	0.75667	0.20551	4	3
O00410_560	IPO5	IPO5_HUMAN Importin-5 OS=Homo sapiens OX=9606 GN=IPO5 PE=1 SV=4	|C(ITC[C])ISLIGLAVGK|C(ITC[C])ISLIGLAVGK||C(ITC[C])ISLIGLAVGK|||	|2|1||1|||	|0.65|0.63||0.99|||	|0.0|NA||NA|||	0.75667	0.20232	4	3
P04731_44	MT1A	MT1A_HUMAN Metallothionein-1A OS=Homo sapiens OX=9606 GN=MT1A PE=1 SV=2	||C(ITC[C])AQGCICK|C(ITC[C])AQGCICK||C(ITC[C])AQGCICK|C(ITC[C])AQGCICK|	||1|2||1|2|	||0.68|0.725||0.87|0.75|	||NA|0.00707||NA|0.0|	0.75625	0.08118	6	4
Q9H9B4_284	SFXN1	SFXN1_HUMAN Sideroflexin-1 OS=Homo sapiens OX=9606 GN=SFXN1 PE=1 SV=4	||C(ITC[C])ALFPQK||C(ITC[C])ALFPQK|C(ITC[C])ALFPQK|C(ITC[C])ALFPQK|C(ITC[C])ALFPQK	||1||2|2|3|1	||0.43||1.09|0.965|0.65|0.64	||NA||0.11314|0.06364|0.01155|NA	0.755	0.26749	9	5
Q99613_752	EIF3C	EIF3C_HUMAN Eukaryotic translation initiation factor 3 subunit C OS=Homo sapiens OX=9606 GN=EIF3C PE=1 SV=1	||C(ITC[C])HSFIINEK|C(ITC[C])HSFIINEK||C(ITC[C])HSFIINEK|C(ITC[C])HSFIINEK|C(ITC[C])HSFIINEK	||1|3||2|1|1	||0.6|0.72||0.975|0.57|0.91	||NA|0.12288||0.02121|NA|NA	0.755	0.18159	8	5
Q9Y678_129	COPG1	COPG1_HUMAN Coatomer subunit gamma-1 OS=Homo sapiens OX=9606 GN=COPG1 PE=1 SV=1	||C(ITC[C])QITDSTMLQAIER||C(ITC[C])QITDSTMLQAIER|C(ITC[C])QITDSTMLQAIER|C(ITC[C])QITDSTMLQAIER|	||1||1|1|2|	||0.67||0.75|0.75|0.85|	||NA||NA|NA|0.0|	0.755	0.07371	5	4
P55809_456	OXCT1	SCOT1_HUMAN Succinyl-CoA:3-ketoacid coenzyme A transferase 1, mitochondrial OS=Homo sapiens OX=9606 GN=OXCT1 PE=1 SV=1	||C(ITC[C])TLPLTGK|C(ITC[C])TLPLTGK||C(ITC[C])TLPLTGK|C(ITC[C])TLPLTGK|	||3|1||1|1|	||0.7|0.69||0.79|0.84|	||0.00577|NA||NA|NA|	0.755	0.07234	6	4
O15270_425	SPTLC2	SPTC2_HUMAN Serine palmitoyltransferase 2 OS=Homo sapiens OX=9606 GN=SPTLC2 PE=1 SV=1	C(ITC[C])IMGQDGTSLGK|C(ITC[C])IMGQDGTSLGK|C(ITC[C])IMGQDGTSLGK|C(ITC[C])IMGQDGTSLGK|C(ITC[C])IMGQDGTSLGK||C(ITC[C])IMGQDGTSLGK|	2|1|1|2|1||1|	0.505|0.45|0.8|0.97|0.93||0.87|	0.06364|NA|NA|0.29698|NA||NA|	0.75417	0.22254	8	6
P43243_821	MATR3	MATR3_HUMAN Matrin-3 OS=Homo sapiens OX=9606 GN=MATR3 PE=1 SV=2	C(ITC[C])SSLPHYQK||C(ITC[C])SSLPHYQK||C(ITC[C])SSLPHYQK|C(ITC[C])SSLPHYQK|C(ITC[C])SSLPHYQK|C(ITC[C])SSLPHYQK	1||1||3|3|2|2	0.35||1.11||0.75|0.67|0.805|0.83	NA||NA||0.08021|0.08737|0.09192|0.04243	0.7525	0.24714	12	6
Q5GLZ8_392	HERC4	HERC4_HUMAN Probable E3 ubiquitin-protein ligase HERC4 OS=Homo sapiens OX=9606 GN=HERC4 PE=1 SV=1	|C(ITC[C])PNPTK|C(ITC[C])PNPTK||||C(ITC[C])PNPTK|C(ITC[C])PNPTK	|1|1||||1|1	|0.88|0.65||||0.63|0.85	|NA|NA||||NA|NA	0.7525	0.13074	4	4
Q96T76_555	MMS19	MMS19_HUMAN MMS19 nucleotide excision repair protein homolog OS=Homo sapiens OX=9606 GN=MMS19 PE=1 SV=2	||C(ITC[C])LQALSAVSTHPSIVK|C(ITC[C])LQALSAVSTHPSIVK|C(ITC[C])LQALSAVSTHPSIVK|C(ITC[C])LQALSAVSTHPSIVK|C(ITC[C])LQALSAVSTHPSIVK|C(ITC[C])LQALSAVSTHPSIVK	||1|1|1|2|1|2	||0.67|0.53|1.0|0.81|0.66|0.83	||NA|NA|NA|0.0|NA|0.07071	0.75	0.16456	8	6
Q96C36_95	PYCR2	P5CR2_HUMAN Pyrroline-5-carboxylate reductase 2 OS=Homo sapiens OX=9606 GN=PYCR2 PE=1 SV=1	|C(ITC[C])AAGVTISSVEK|C(ITC[C])AAGVTISSVEK||||C(ITC[C])AAGVTISSVEK|	|1|1||||1|	|0.58|0.87||||0.8|	|NA|NA||||NA|	0.75	0.15133	3	3
Q12965_790	MYO1E	MYO1E_HUMAN Unconventional myosin-Ie OS=Homo sapiens OX=9606 GN=MYO1E PE=1 SV=2	||C(ITC[C])LYLIGR|C(ITC[C])LYLIGR||C(ITC[C])LYLIGR|C(ITC[C])LYLIGR|	||1|1||1|2|	||0.64|0.66||0.95|0.75|	||NA|NA||NA|0.11314|	0.75	0.14166	5	4
P13639_369	EEF2	EF2_HUMAN Elongation factor 2 OS=Homo sapiens OX=9606 GN=EEF2 PE=1 SV=4	C(ITC[C])ELLYEGPPDDEAAMGIK|C(ITC[C])ELLYEGPPDDEAAMGIK|C(ITC[C])ELLYEGPPDDEAAMGIK|C(ITC[C])ELLYEGPPDDEAAMGIK|C(ITC[C])ELLYEGPPDDEAAMGIK|C(ITC[C])ELLYEGPPDDEAAMGIK|C(ITC[C])ELLYEGPPDDEAAMGIK|C(ITC[C])ELLYEGPPDDEAAMGIK	37|38|21|13|17|18|22|22	0.52|0.555|0.84|0.81|0.8|0.84|0.805|0.82	0.08228|0.22855|0.08727|0.06267|0.06552|0.06245|0.0984|0.16917	0.74875	0.13155	188	8
P35250_270	RFC2	RFC2_HUMAN Replication factor C subunit 2 OS=Homo sapiens OX=9606 GN=RFC2 PE=1 SV=3	C(ITC[C])VNANIDEAYK||C(ITC[C])VNANIDEAYK|C(ITC[C])VNANIDEAYK||C(ITC[C])VNANIDEAYK||C(ITC[C])VNANIDEAYK	1||2|3||1||1	1.1||0.43|0.58||0.78||0.85	NA||0.0|0.02309||NA||NA	0.748	0.25724	8	5
Q13616_551	CUL1	CUL1_HUMAN Cullin-1 OS=Homo sapiens OX=9606 GN=CUL1 PE=1 SV=2	|C(ITC[C])TFALPSELER|C(ITC[C])TFALPSELER||||C(ITC[C])TFALPSELER|C(ITC[C])TFALPSELER	|1|1||||4|2	|0.3|0.89||||0.87|0.92	|NA|NA||||0.0|0.0	0.745	0.29738	8	4
Q92616_1362	GCN1	GCN1_HUMAN eIF-2-alpha kinase activator GCN1 OS=Homo sapiens OX=9606 GN=GCN1 PE=1 SV=6	C(ITC[C])LPPLVPAIK||C(ITC[C])LPPLVPAIK|C(ITC[C])LPPLVPAIK|C(ITC[C])LPPLVPAIK|C(ITC[C])LPPLVPAIK|C(ITC[C])LPPLVPAIK|C(ITC[C])LPPLVPAIK	1||3|4|3|3|3|1	0.67||0.47|0.48|0.96|0.92|0.79|0.9	NA||0.04041|0.015|0.03|0.04041|0.00577|NA	0.74143	0.20587	18	7
Q5JTV8_424	TOR1AIP1	TOIP1_HUMAN Torsin-1A-interacting protein 1 OS=Homo sapiens OX=9606 GN=TOR1AIP1 PE=1 SV=2	|C(ITC[C])LSEQIADAYSSFR||C(ITC[C])LSEQIADAYSSFR|||C(ITC[C])LSEQIADAYSSFR|C(ITC[C])LSEQIADAYSSFR	|2||1|||1|2	|1.11||0.56|||0.56|0.72	|0.0||NA|||NA|0.0	0.7375	0.25953	6	4
Q99829_53	CPNE1	CPNE1_HUMAN Copine-1 OS=Homo sapiens OX=9606 GN=CPNE1 PE=1 SV=1	|||C(ITC[C])SSPEFSK||C(ITC[C])SSPEFSK|C(ITC[C])SSPEFSK|	|||1||1|1|	|||0.96||0.56|0.69|	|||NA||NA|NA|	0.73667	0.20404	3	3
Q14997_1100	PSME4	PSME4_HUMAN Proteasome activator complex subunit 4 OS=Homo sapiens OX=9606 GN=PSME4 PE=1 SV=2	|||C(ITC[C])VEIAELLQQSK||C(ITC[C])VEIAELLQQSK|C(ITC[C])VEIAELLQQSK|C(ITC[C])VEIAELLQQSK	|||1||1|1|1	|||0.59||0.88|0.67|0.8	|||NA||NA|NA|NA	0.735	0.12974	4	4
P78347_903	GTF2I	GTF2I_HUMAN General transcription factor II-I OS=Homo sapiens OX=9606 GN=GTF2I PE=1 SV=2	||C(ITC[C])VVVDGMPPGVSFK|C(ITC[C])VVVDGMPPGVSFK|C(ITC[C])VVVDGMPPGVSFK|C(ITC[C])VVVDGMPPGVSFK|C(ITC[C])VVVDGMPPGVSFK|C(ITC[C])VVVDGMPPGVSFK	||5|2|2|1|5|4	||0.57|0.58|1.015|0.87|0.73|0.635	||0.19718|0.14142|0.16263|NA|0.07681|0.1565	0.73333	0.1777	19	6
Q9UGR2_142	ZC3H7B	Z3H7B_HUMAN Zinc finger CCCH domain-containing protein 7B OS=Homo sapiens OX=9606 GN=ZC3H7B PE=1 SV=2	||C(ITC[C])SLALPHDESVTQLGQELAQK||||C(ITC[C])SLALPHDESVTQLGQELAQK|C(ITC[C])SLALPHDESVTQLGQELAQK	||1||||1|2	||0.6||||0.73|0.87	||NA||||NA|0.22627	0.73333	0.13503	4	3
Q99798_592	ACO2	ACON_HUMAN Aconitate hydratase, mitochondrial OS=Homo sapiens OX=9606 GN=ACO2 PE=1 SV=2	C(ITC[C])TTDHISAAGPWLK|C(ITC[C])TTDHISAAGPWLK|C(ITC[C])TTDHISAAGPWLK|C(ITC[C])TTDHISAAGPWLK|C(ITC[C])TTDHISAAGPWLK|C(ITC[C])TTDHISAAGPWLK|C(ITC[C])TTDHISAAGPWLK|C(ITC[C])TTDHISAAGPWLK	6|3|3|3|2|2|3|2	0.835|0.79|0.88|0.91|0.375|0.525|0.79|0.75	0.1257|0.03215|0.09018|0.21633|0.34648|0.4879|0.09504|0.01414	0.73188	0.18576	24	8
Q13363_38	CTBP1	CTBP1_HUMAN C-terminal-binding protein 1 OS=Homo sapiens OX=9606 GN=CTBP1 PE=1 SV=2	||||C(ITC[C])TVEMPILK|C(ITC[C])TVEMPILK|C(ITC[C])TVEMPILK|C(ITC[C])TVEMPILK	||||2|2|3|1	||||0.685|0.8|0.66|0.78	||||0.02121|0.09899|0.05033|NA	0.73125	0.06909	8	4
P61081_47	UBE2M	UBC12_HUMAN NEDD8-conjugating enzyme Ubc12 OS=Homo sapiens OX=9606 GN=UBE2M PE=1 SV=1	|C(ITC[C])DISFSDPDDLLNFK|||||C(ITC[C])DISFSDPDDLLNFK|C(ITC[C])DISFSDPDDLLNFK	|1|||||2|2	|0.95|||||0.72|0.52	|NA|||||0.0|0.0	0.73	0.21517	5	3
Q9BPX3_611	NCAPG	CND3_HUMAN Condensin complex subunit 3 OS=Homo sapiens OX=9606 GN=NCAPG PE=1 SV=1	||||C(ITC[C])GLQNQDFAR||C(ITC[C])GLQNQDFAR CC(ITC[C])GLQNQDFAR|C(ITC[C])GLQNQDFAR	||||1||3|1	||||0.83||0.7|0.66	||||NA||0.11547|NA	0.73	0.08888	5	3
P32322_120	PYCR1	P5CR1_HUMAN Pyrroline-5-carboxylate reductase 1, mitochondrial OS=Homo sapiens OX=9606 GN=PYCR1 PE=1 SV=2	C(ITC[C])MTNTPVVVR||C(ITC[C])MTNTPVVVR||C(ITC[C])MTNTPVVVR|C(ITC[C])MTNTPVVVR|C(ITC[C])MTNTPVVVR|C(ITC[C])MTNTPVVVR	1||1||1|1|1|2	1.08||0.56||0.76|0.74|0.63|0.565	NA||NA||NA|NA|NA|0.03536	0.7225	0.19457	7	6
P31689_302	DNAJA1	DNJA1_HUMAN DnaJ homolog subfamily A member 1 OS=Homo sapiens OX=9606 GN=DNAJA1 PE=1 SV=2	C(ITC[C])VLNEGMPIYR|C(ITC[C])VLNEGMPIYR|C(ITC[C])VLNEGMPIYR|C(ITC[C])VLNEGMPIYR||C(ITC[C])VLNEGMPIYR||	8|8|7|4||1||	0.665|0.63|0.79|0.74||0.78||	0.06756|0.04862|0.08386|0.01||NA||	0.721	0.07075	28	5
P20700_443	LMNB1	LMNB1_HUMAN Lamin-B1 OS=Homo sapiens OX=9606 GN=LMNB1 PE=1 SV=2	C(ITC[C])IEEIDVDGK|C(ITC[C])IEEIDVDGK||||C(ITC[C])IEEIDVDGK||C(ITC[C])IEEIDVDGK	4|2||||1||3	0.535|0.47||||1.01||0.86	0.04349|0.12728||||NA||0.03786	0.71875	0.25847	10	4
Q9H8H3_96	METTL7A	MET7A_HUMAN Methyltransferase-like protein 7A OS=Homo sapiens OX=9606 GN=METTL7A PE=1 SV=1	|||C(ITC[C])IDPNPNFEK|C(ITC[C])IDPNPNFEK||C(ITC[C])IDPNPNFEK|C(ITC[C])IDPNPNFEK	|||2|1||2|1	|||0.51|0.81||0.87|0.68	|||0.04243|NA||0.0|NA	0.7175	0.15945	6	4
P24928_1470	POLR2A	RPB1_HUMAN DNA-directed RNA polymerase II subunit RPB1 OS=Homo sapiens OX=9606 GN=POLR2A PE=1 SV=2	|C(ITC[C])FDLLLDAEK|C(ITC[C])FDLLLDAEK|C(ITC[C])FDLLLDAEK|C(ITC[C])FDLLLDAEK|C(ITC[C])FDLLLDAEK|C(ITC[C])FDLLLDAEK|C(ITC[C])FDLLLDAEK	|3|1|1|1|3|2|3	|0.3|0.69|0.8|0.84|0.8|0.65|0.94	|0.28868|NA|NA|NA|0.0|0.18385|0.07024	0.71714	0.20726	14	7
Q13144_618	EIF2B5	EI2BE_HUMAN Translation initiation factor eIF-2B subunit epsilon OS=Homo sapiens OX=9606 GN=EIF2B5 PE=1 SV=3	|||C(ITC[C])ALLLPLLK|||C(ITC[C])ALLLPLLK|C(ITC[C])ALLLPLLK	|||3|||3|1	|||0.58|||0.53|1.04	|||0.0|||0.0|NA	0.71667	0.28113	7	3
P17987_147	TCP1	TCPA_HUMAN T-complex protein 1 subunit alpha OS=Homo sapiens OX=9606 GN=TCP1 PE=1 SV=1	C(ITC[C])LINAAK||||C(ITC[C])LINAAK||C(ITC[C])LINAAK|C(ITC[C])LINAAK	1||||2||1|1	0.42||||0.74||0.89|0.8	NA||||0.0||NA|NA	0.7125	0.20451	5	4
Q8NDV3_29	SMC1B	SMC1B_HUMAN Structural maintenance of chromosomes protein 1B OS=Homo sapiens OX=9606 GN=SMC1B PE=2 SV=2	|||C(ITC[C])IIGPNGSGK||C(ITC[C])IIGPNGSGK|C(ITC[C])IIGPNGSGK|	|||1||2|1|	|||0.69||0.805|0.64|	|||NA||0.03536|NA|	0.71167	0.08461	4	3
Q92616_648	GCN1	GCN1_HUMAN eIF-2-alpha kinase activator GCN1 OS=Homo sapiens OX=9606 GN=GCN1 PE=1 SV=6	||||C(ITC[C])VISGVPGLK||C(ITC[C])VISGVPGLK|C(ITC[C])VISGVPGLK	||||1||1|2	||||0.97||0.6|0.56	||||NA||NA|0.11314	0.71	0.22605	4	3
O75521_380	ECI2	ECI2_HUMAN Enoyl-CoA delta isomerase 2 OS=Homo sapiens OX=9606 GN=ECI2 PE=1 SV=4	C(ITC[C])TNAVVNFLSR||C(ITC[C])TNAVVNFLSR|C(ITC[C])TNAVVNFLSR|C(ITC[C])TNAVVNFLSR||C(ITC[C])TNAVVNFLSR|C(ITC[C])TNAVVNFLSR	1||2|1|2||1|1	0.56||0.595|0.49|0.87||0.91|0.82	NA||0.03536|NA|0.0||NA|NA	0.7075	0.17988	8	6
Q04446_81	GBE1	GLGB_HUMAN 1,4-alpha-glucan-branching enzyme OS=Homo sapiens OX=9606 GN=GBE1 PE=1 SV=3	||C(ITC[C])ADGGLYCK|C(ITC[C])ADGGLYCK||C(ITC[C])ADGGLYCK||	||2|1||1||	||0.75|0.67||0.7||	||0.0|NA||NA||	0.70667	0.04041	4	3
Q8IY37_1083	DHX37	DHX37_HUMAN Probable ATP-dependent RNA helicase DHX37 OS=Homo sapiens OX=9606 GN=DHX37 PE=1 SV=1	|C(ITC[C])LLSSPGTMLK|C(ITC[C])LLSSPGTMLK||C(ITC[C])LLSSPGTMLK|C(ITC[C])LLSSPGTMLK||C(ITC[C])LLSSPGTMLK	|1|1||1|2||1	|1.05|0.6||0.63|0.72||0.51	|NA|NA||NA|0.09899||NA	0.702	0.20849	6	5
P78347_745	GTF2I	GTF2I_HUMAN General transcription factor II-I OS=Homo sapiens OX=9606 GN=GTF2I PE=1 SV=2	C(ITC[C])GEALGLK|C(ITC[C])GEALGLK|C(ITC[C])GEALGLK|C(ITC[C])GEALGLK|C(ITC[C])GEALGLK|C(ITC[C])GEALGLK|C(ITC[C])GEALGLK|C(ITC[C])GEALGLK	4|2|5|4|2|2|3|5	0.62|0.62|0.82|0.79|0.685|0.71|0.67|0.7	0.10149|0.01414|0.02|0.0818|0.00707|0.01414|0.02309|0.23234	0.70188	0.07221	27	8
O15228_73	GNPAT	GNPAT_HUMAN Dihydroxyacetone phosphate acyltransferase OS=Homo sapiens OX=9606 GN=GNPAT PE=1 SV=1	||C(ITC[C])SVLNSEEIHYVIK|C(ITC[C])SVLNSEEIHYVIK||||C(ITC[C])SVLNSEEIHYVIK	||2|2||||1	||0.495|0.7||||0.91	||0.34648|0.0||||NA	0.70167	0.20751	5	3
Q9NV70_566	EXOC1	EXOC1_HUMAN Exocyst complex component 1 OS=Homo sapiens OX=9606 GN=EXOC1 PE=1 SV=4	||C(ITC[C])GTPLPVSSEK|C(ITC[C])GTPLPVSSEK|C(ITC[C])GTPLPVSSEK||C(ITC[C])GTPLPVSSEK|	||1|1|1||1|	||0.6|0.59|0.77||0.84|	||NA|NA|NA||NA|	0.7	0.12463	4	4
P49588_773	AARS1	SYAC_HUMAN Alanine--tRNA ligase, cytoplasmic OS=Homo sapiens OX=9606 GN=AARS1 PE=1 SV=2	C(ITC[C])LSVMEAK|C(ITC[C])LSVMEAK|C(ITC[C])LSVMEAK|C(ITC[C])LSVMEAK|C(ITC[C])LSVMEAK|C(ITC[C])LSVMEAK|C(ITC[C])LSVMEAK|C(ITC[C])LSVMEAK	11|8|11|17|3|9|4|5	0.7|0.55|0.75|0.79|0.66|0.68|0.765|0.68	0.13178|0.16062|0.02212|0.05667|0.05292|0.20506|0.22911|0.1274	0.69687	0.07526	68	8
Q15003_402	NCAPH	CND2_HUMAN Condensin complex subunit 2 OS=Homo sapiens OX=9606 GN=NCAPH PE=1 SV=3	||C(ITC[C])QEEMISLGDGDIR|EPCQVQSC(ITC[C])QEEMISLGDGDIR||C(ITC[C])QEEMISLGDGDIR||	||1|1||1||	||0.68|0.56||0.85||	||NA|NA||NA||	0.69667	0.14572	3	3
Q8IWA0_12	WDR75	WDR75_HUMAN WD repeat-containing protein 75 OS=Homo sapiens OX=9606 GN=WDR75 PE=1 SV=1	C(ITC[C])GGSELNFR|C(ITC[C])GGSELNFR|C(ITC[C])GGSELNFR|C(ITC[C])GGSELNFR||||	1|2|1|1||||	0.55|0.67|0.73|0.83||||	NA|0.0|NA|NA||||	0.695	0.11705	5	4
O00442_28	RTCA	RTCA_HUMAN RNA 3'-terminal phosphate cyclase OS=Homo sapiens OX=9606 GN=RTCA PE=1 SV=1	||C(ITC[C])LLGLPLR|C(ITC[C])LLGLPLR||||C(ITC[C])LLGLPLR	||2|2||||1	||0.555|0.58||||0.94	||0.02121|0.04243||||NA	0.69167	0.21543	5	3
Q9BV86_64	NTMT1	NTM1A_HUMAN N-terminal Xaa-Pro-Lys N-methyltransferase 1 OS=Homo sapiens OX=9606 GN=NTMT1 PE=1 SV=3	||TGTSC(ITC[C])ALDCGAGIGR|TGTSC(ITC[C])ALDCGAGIGR||C(ITC[C])ALDCGAGIGR TGTSC(ITC[C])ALDCGAGIGR|C(ITC[C])ALDCGAGIGR TGTSC(ITC[C])ALDCGAGIGR|C(ITC[C])ALDCGAGIGR	||1|1||2|3|1	||0.54|0.55||0.885|0.55|0.92	||NA|NA||0.19092|0.11547|NA	0.689	0.19533	8	5
Q96SB3_272	PPP1R9B	NEB2_HUMAN Neurabin-2 OS=Homo sapiens OX=9606 GN=PPP1R9B PE=1 SV=3	C(ITC[C])PAGQQPPQHR|C(ITC[C])PAGQQPPQHR||C(ITC[C])PAGQQPPQHR||||	2|1||1||||	0.53|0.53||1.0||||	0.07071|NA||NA||||	0.68667	0.27135	4	3
Q9HCU5_128	PREB	PREB_HUMAN Prolactin regulatory element-binding protein OS=Homo sapiens OX=9606 GN=PREB PE=1 SV=2	C(ITC[C])GAETQHEGLELR|C(ITC[C])GAETQHEGLELR||C(ITC[C])GAETQHEGLELR||||	2|1||2||||	0.68|0.43||0.945||||	0.11314|NA||0.47376||||	0.685	0.25754	5	3
Q9H0C8_301	ILKAP	ILKAP_HUMAN Integrin-linked kinase-associated serine/threonine phosphatase 2C OS=Homo sapiens OX=9606 GN=ILKAP PE=1 SV=1	C(ITC[C])GVTSVPDIR|C(ITC[C])GVTSVPDIR|C(ITC[C])GVTSVPDIR|C(ITC[C])GVTSVPDIR|C(ITC[C])GVTSVPDIR|C(ITC[C])GVTSVPDIR|C(ITC[C])GVTSVPDIR|C(ITC[C])GVTSVPDIR	1|3|3|2|1|2|2|4	0.92|0.89|0.58|0.53|0.84|0.69|0.4|0.625	NA|0.0|0.02309|0.0|NA|0.07071|0.33941|0.025	0.68437	0.18562	18	8
O60343_753	TBC1D4	TBCD4_HUMAN TBC1 domain family member 4 OS=Homo sapiens OX=9606 GN=TBC1D4 PE=1 SV=2	||C(ITC[C])SNESLSVGGTSVTPR|C(ITC[C])SNESLSVGGTSVTPR||||C(ITC[C])SNESLSVGGTSVTPR	||1|1||||1	||0.79|0.52||||0.74	||NA|NA||||NA	0.68333	0.14364	3	3
Q04637_662	EIF4G1	IF4G1_HUMAN Eukaryotic translation initiation factor 4 gamma 1 OS=Homo sapiens OX=9606 GN=EIF4G1 PE=1 SV=4	C(ITC[C])GPDFTPSFANLGR||C(ITC[C])GPDFTPSFANLGR|C(ITC[C])GPDFTPSFANLGR|C(ITC[C])GPDFTPSFANLGR|C(ITC[C])GPDFTPSFANLGR|C(ITC[C])GPDFTPSFANLGR|C(ITC[C])GPDFTPSFANLGR	7||2|3|2|1|2|2	0.87||0.6|0.54|0.605|0.72|0.695|0.715	0.09358||0.04243|0.06557|0.09192|NA|0.07778|0.02121	0.67786	0.10858	19	7
Q13907_86	IDI1	IDI1_HUMAN Isopentenyl-diphosphate Delta-isomerase 1 OS=Homo sapiens OX=9606 GN=IDI1 PE=1 SV=2	||C(ITC[C])SHPLSNPAELEESDALGVR||C(ITC[C])SHPLSNPAELEESDALGVR|C(ITC[C])SHPLSNPAELEESDALGVR||	||1||1|2||	||0.51||0.84|0.675||	||NA||NA|0.03536||	0.675	0.165	4	3
P56270_371	MAZ	MAZ_HUMAN Myc-associated zinc finger protein OS=Homo sapiens OX=9606 GN=MAZ PE=1 SV=1	C(ITC[C])EAAFATK||C(ITC[C])EAAFATK|C(ITC[C])EAAFATK||||	1||1|2||||	0.92||0.58|0.505||||	NA||NA|0.0495||||	0.66833	0.22115	4	3
Q9HB90_52	RRAGC	RRAGC_HUMAN Ras-related GTP-binding protein C OS=Homo sapiens OX=9606 GN=RRAGC PE=1 SV=1	C(ITC[C])GPGGADSSKPR|||C(ITC[C])GPGGADSSKPR|||C(ITC[C])GPGGADSSKPR|	2|||2|||2|	0.575|||0.64|||0.79|	0.00707|||0.0|||0.0|	0.66833	0.11026	6	3
P48507_194	GCLM	GSH0_HUMAN Glutamate--cysteine ligase regulatory subunit OS=Homo sapiens OX=9606 GN=GCLM PE=1 SV=1	||C(ITC[C])VMPPDLTAFAK|C(ITC[C])VMPPDLTAFAK|C(ITC[C])VMPPDLTAFAK||C(ITC[C])VMPPDLTAFAK|C(ITC[C])VMPPDLTAFAK	||3|1|1||4|2	||0.52|0.61|0.81||0.71|0.69	||0.66731|NA|NA||0.04761|0.01414	0.668	0.10918	11	5
Q9NZD8_204	SPG21	SPG21_HUMAN Maspardin OS=Homo sapiens OX=9606 GN=SPG21 PE=1 SV=1	||C(ITC[C])QNSYVEPHK||||C(ITC[C])QNSYVEPHK|C(ITC[C])QNSYVEPHK	||1||||1|3	||0.58||||0.75|0.67	||NA||||NA|0.0	0.66667	0.08505	5	3
P68363_376	TUBA1B	TBA1B_HUMAN Tubulin alpha-1B chain OS=Homo sapiens OX=9606 GN=TUBA1B PE=1 SV=1	|||C(ITC[C])MLSNTTAIAEAWAR||C(ITC[C])MLSNTTAIAEAWAR|C(ITC[C])MLSNTTAIAEAWAR|C(ITC[C])MLSNTTAIAEAWAR	|||2||1|3|4	|||0.445||0.82|0.7|0.7	|||0.33234||NA|0.15822|0.10116	0.66625	0.15798	10	4
Q05639_411	EEF1A2	EF1A2_HUMAN Elongation factor 1-alpha 2 OS=Homo sapiens OX=9606 GN=EEF1A2 PE=1 SV=1	C(ITC[C])VESFSQYPPLGR||C(ITC[C])VESFSQYPPLGR|C(ITC[C])VESFSQYPPLGR|||C(ITC[C])VESFSQYPPLGR|C(ITC[C])VESFSQYPPLGR	4||5|6|||4|1	0.47||0.65|0.685|||0.815|0.7	0.44947||0.12582|0.06713|||0.08888|NA	0.664	0.12487	20	5
P46937_343	YAP1	YAP1_HUMAN Transcriptional coactivator YAP1 OS=Homo sapiens OX=9606 GN=YAP1 PE=1 SV=2	C(ITC[C])QELALR|C(ITC[C])QELALR||C(ITC[C])QELALR||||	2|1||1||||	0.47|0.6||0.91||||	0.04243|NA||NA||||	0.66	0.22605	4	3
Q14839_1019	CHD4	CHD4_HUMAN Chromodomain-helicase-DNA-binding protein 4 OS=Homo sapiens OX=9606 GN=CHD4 PE=1 SV=2	||CC(ITC[C])NHPYLFPVAAMEAPK||C(ITC[C])NHPYLFPVAAMEAPK||C(ITC[C])NHPYLFPVAAMEAPK|C(ITC[C])NHPYLFPVAAMEAPK	||1||1||1|1	||0.48||0.86||0.75|0.55	||NA||NA||NA|NA	0.66	0.17569	4	4
Q9UEW8_99	STK39	STK39_HUMAN STE20/SPS1-related proline-alanine-rich protein kinase OS=Homo sapiens OX=9606 GN=STK39 PE=1 SV=3	||C(ITC[C])QTSMDELLK|C(ITC[C])QTSMDELLK|||C(ITC[C])QTSMDELLK|C(ITC[C])QTSMDELLK	||4|5|||3|2	||0.63|0.6|||0.72|0.685	||0.06238|0.09513|||0.14731|0.12021	0.65875	0.05391	14	4
O95071_2094	UBR5	UBR5_HUMAN E3 ubiquitin-protein ligase UBR5 OS=Homo sapiens OX=9606 GN=UBR5 PE=1 SV=2	||||C(ITC[C])LEVLPTK|C(ITC[C])LEVLPTK|C(ITC[C])LEVLPTK|C(ITC[C])LEVLPTK	||||1|1|1|1	||||0.87|0.7|0.49|0.57	||||NA|NA|NA|NA	0.6575	0.16601	4	4
P51812_579	RPS6KA3	KS6A3_HUMAN Ribosomal protein S6 kinase alpha-3 OS=Homo sapiens OX=9606 GN=RPS6KA3 PE=1 SV=1	|C(ITC[C])YTANFVAPEVLK|C(ITC[C])YTANFVAPEVLK|||||C(ITC[C])YTANFVAPEVLK	|1|1|||||1	|0.6|0.62|||||0.74	|NA|NA|||||NA	0.65333	0.07572	3	3
P34949_309	MPI	MPI_HUMAN Mannose-6-phosphate isomerase OS=Homo sapiens OX=9606 GN=MPI PE=1 SV=2	||C(ITC[C])EMLSYTPSSSK||C(ITC[C])EMLSYTPSSSK||C(ITC[C])EMLSYTPSSSK|C(ITC[C])EMLSYTPSSSK	||2||1||2|2	||0.675||0.75||0.61|0.55	||0.14849||NA||0.04243|0.0	0.64625	0.08596	7	4
Q92878_1225	RAD50	RAD50_HUMAN DNA repair protein RAD50 OS=Homo sapiens OX=9606 GN=RAD50 PE=1 SV=1	|||C(ITC[C])GIIALDEPTTNLDR||C(ITC[C])GIIALDEPTTNLDR|C(ITC[C])GIIALDEPTTNLDR|	|||1||1|1|	|||0.46||0.88|0.59|	|||NA||NA|NA|	0.64333	0.21502	3	3
Q9NVP2_172	ASF1B	ASF1B_HUMAN Histone chaperone ASF1B OS=Homo sapiens OX=9606 GN=ASF1B PE=1 SV=1	|||||C(ITC[C])GLPLNCTPIK|C(ITC[C])GLPLNCTPIK|C(ITC[C])GLPLNCTPIK	|||||1|1|2	|||||0.79|0.54|0.58	|||||NA|NA|0.0	0.63667	0.13429	4	3
P55212_148	CASP6	CASP6_HUMAN Caspase-6 OS=Homo sapiens OX=9606 GN=CASP6 PE=1 SV=2	||C(ITC[C])HSLVGKPK C(ITC[C])HSLVGK|C(ITC[C])HSLVGK|||C(ITC[C])HSLVGK|C(ITC[C])HSLVGK	||3|1|||4|2	||0.58|0.59|||0.625|0.72	||0.0866|NA|||0.14341|0.0	0.62875	0.06382	10	4
Q99536_86	VAT1	VAT1_HUMAN Synaptic vesicle membrane protein VAT-1 homolog OS=Homo sapiens OX=9606 GN=VAT1 PE=1 SV=2	|||AC(ITC[C])GLNFADLMAR C(ITC[C])GLNFADLMAR|AC(ITC[C])GLNFADLMAR|AC(ITC[C])GLNFADLMAR|AC(ITC[C])GLNFADLMAR C(ITC[C])GLNFADLMAR|AC(ITC[C])GLNFADLMAR C(ITC[C])GLNFADLMAR	|||2|2|1|4|6	|||0.385|0.765|0.67|0.705|0.61	|||0.00707|0.02121|NA|0.04787|0.08385	0.627	0.14648	15	5
O43159_332	RRP8	RRP8_HUMAN Ribosomal RNA-processing protein 8 OS=Homo sapiens OX=9606 GN=RRP8 PE=1 SV=2	||C(ITC[C])FDLASLDPR||||C(ITC[C])FDLASLDPR|C(ITC[C])FDLASLDPR	||1||||1|1	||0.53||||0.62|0.73	||NA||||NA|NA	0.62667	0.10017	3	3
Q5VSL9_798	STRIP1	STRP1_HUMAN Striatin-interacting protein 1 OS=Homo sapiens OX=9606 GN=STRIP1 PE=1 SV=1	C(ITC[C])LQSVLGQR||C(ITC[C])LQSVLGQR|C(ITC[C])LQSVLGQR||||	1||1|1||||	0.65||0.57|0.66||||	NA||NA|NA||||	0.62667	0.04933	3	3
P40763_251	STAT3	STAT3_HUMAN Signal transducer and activator of transcription 3 OS=Homo sapiens OX=9606 GN=STAT3 PE=1 SV=2	||C(ITC[C])IGGPPNICLDR|C(ITC[C])IGGPPNICLDR||||C(ITC[C])IGGPPNICLDR	||1|1||||1	||0.51|0.63||||0.73	||NA|NA||||NA	0.62333	0.11015	3	3
Q9BTW9_420	TBCD	TBCD_HUMAN Tubulin-specific chaperone D OS=Homo sapiens OX=9606 GN=TBCD PE=1 SV=2	||C(ITC[C])LALAELGR|C(ITC[C])LALAELGR|||C(ITC[C])LALAELGR|	||1|2|||1|	||0.42|0.565|||0.79|	||NA|0.10607|||NA|	0.59167	0.18644	4	3
Q5T4S7_3392	UBR4	UBR4_HUMAN E3 ubiquitin-protein ligase UBR4 OS=Homo sapiens OX=9606 GN=UBR4 PE=1 SV=1	||||C(ITC[C])TALVNQLNK|C(ITC[C])TALVNQLNK|C(ITC[C])TALVNQLNK|	||||1|1|1|	||||0.52|0.53|0.72|	||||NA|NA|NA|	0.59	0.11269	3	3
A8MVJ9_153		HPF1L_HUMAN Putative histone PARylation factor 1-like OS=Homo sapiens OX=9606 PE=5 SV=1	||C(ITC[C])IIVPNGDNVFAAVK|C(ITC[C])IIVPNGDNVFAAVK|||C(ITC[C])IIVPNGDNVFAAVK|C(ITC[C])IIVPNGDNVFAAVK	||1|1|||2|2	||0.57|0.53|||0.54|0.65	||NA|NA|||0.0|0.0	0.5725	0.05439	6	4
Q15785_222	TOMM34	TOM34_HUMAN Mitochondrial import receptor subunit TOM34 OS=Homo sapiens OX=9606 GN=TOMM34 PE=1 SV=2	||C(ITC[C])SNLESATYSNR||C(ITC[C])SNLESATYSNR||C(ITC[C])SNLESATYSNR|	||1||1||3|	||0.4||0.69||0.62|	||NA||NA||0.04041|	0.57	0.15133	5	3
Q5J8M3_69	EMC4	EMC4_HUMAN ER membrane protein complex subunit 4 OS=Homo sapiens OX=9606 GN=EMC4 PE=1 SV=2	||C(ITC[C])WDIALGPLK|C(ITC[C])WDIALGPLK||C(ITC[C])WDIALGPLK|C(ITC[C])WDIALGPLK|C(ITC[C])WDIALGPLK	||4|1||2|1|2	||0.49|0.29||0.8|0.59|0.665	||0.19374|NA||0.0|NA|0.06364	0.567	0.19176	10	5
Q7L2J0_54	MEPCE	MEPCE_HUMAN 7SK snRNA methylphosphate capping enzyme OS=Homo sapiens OX=9606 GN=MEPCE PE=1 SV=1	C(ITC[C])APSAGSPAAAVGR|C(ITC[C])APSAGSPAAAVGR||||C(ITC[C])APSAGSPAAAVGR||	2|1||||1||	0.55|0.51||||0.63||	0.0|NA||||NA||	0.56333	0.0611	4	3
P26640_41	VARS1	SYVC_HUMAN Valine--tRNA ligase OS=Homo sapiens OX=9606 GN=VARS1 PE=1 SV=4	||C(ITC[C])LQPPPTSR|C(ITC[C])LQPPPTSR||C(ITC[C])LQPPPTSR|C(ITC[C])LQPPPTSR|C(ITC[C])LQPPPTSR	||1|2||1|2|2	||0.39|0.37||0.49|0.58|0.71	||NA|0.02828||NA|0.22627|0.28284	0.508	0.14078	8	5
P49792_514	RANBP2	RBP2_HUMAN E3 SUMO-protein ligase RanBP2 OS=Homo sapiens OX=9606 GN=RANBP2 PE=1 SV=2	||C(ITC[C])LPLPVCK|C(ITC[C])LPLPVCK|||C(ITC[C])LPLPVCK|	||1|1|||2|	||0.35|0.39|||0.61|	||NA|NA|||0.01414|	0.45	0.14	4	3
P13797_566	PLS3	PLST_HUMAN Plastin-3 OS=Homo sapiens OX=9606 GN=PLS3 PE=1 SV=4	||C(ITC[C])INYDLVK|C(ITC[C])INYDLVK||C(ITC[C])INYDLVK||	||1|1||1||	||0.21|0.24||0.22||	||NA|NA||NA||	0.22333	0.01528	3	3
P23258_138	TUBG1	TBG1_HUMAN Tubulin gamma-1 chain OS=Homo sapiens OX=9606 GN=TUBG1 PE=1 SV=2	||||C(ITC[C])HSIAGGTGSGLGSYLLER|C(ITC[C])HSIAGGTGSGLGSYLLER|C(ITC[C])HSIAGGTGSGLGSYLLER|	||||1|1|1|	||||0.11|0.09|0.15|	||||NA|NA|NA|	0.11667	0.03055	3	3

## Sheet: 2
Ac_Site	Genename	Description	Modified sequences	Spectrum count	All ratio	All SD Ratio	Ratio average	Ratio SD	Total spectrum count
Q9H9P8_124	L2HGDH	L2HDH_HUMAN L-2-hydroxyglutarate dehydrogenase, mitochondrial OS=Homo sapiens OX=9606 GN=L2HGDH PE=1 SV=3	||LCVQGAALLYEYC(ITC[C])QQK|LCVQGAALLYEYC(ITC[C])QQK|||LCVQGAALLYEYC(ITC[C])QQK|LCVQGAALLYEYC(ITC[C])QQK	||1|2|||2|2	||20.0|20.0|||20.0|20.0	||NA|0.0|||0.0|0.0	20	0	7
Q9NTJ5_389	SACM1L	SAC1_HUMAN Phosphatidylinositol-3-phosphatase SAC1 OS=Homo sapiens OX=9606 GN=SACM1L PE=1 SV=2	C(ITC[C])MDCLDR|C(ITC[C])MDCLDR|||C(ITC[C])MDCLDR|||	1|1|||1|||	16.09|20.0|||16.6|||	NA|NA|||NA|||	17.5633	2.12557	3
Q15005_17	SPCS2	SPCS2_HUMAN Signal peptidase complex subunit 2 OS=Homo sapiens OX=9606 GN=SPCS2 PE=1 SV=3	C(ITC[C])SGAGGASNCGTGSGR|C(ITC[C])SGAGGASNCGTGSGR|||C(ITC[C])SGAGGASNCGTGSGR|C(ITC[C])SGAGGASNCGTGSGR||	2|1|||2|1||	6.33|7.3|||7.85|9.91||	0.0|NA|||4.07294|NA||	7.8475	1.51178	6
P38432_336	COIL	COIL_HUMAN Coilin OS=Homo sapiens OX=9606 GN=COIL PE=1 SV=1	C(ITC[C])AAGFLK|C(ITC[C])AAGFLK|||C(ITC[C])AAGFLK|||	1|1|||1|||	3.33|2.54|||3.14|||	NA|NA|||NA|||	3.00333	0.41235	3
P83436_174	COG7	COG7_HUMAN Conserved oligomeric Golgi complex subunit 7 OS=Homo sapiens OX=9606 GN=COG7 PE=1 SV=1	C(ITC[C])VHLEALK|C(ITC[C])VHLEALK||||C(ITC[C])VHLEALK||	2|2||||1||	2.505|2.44||||2.83||	0.34648|0.32527||||NA||	2.59167	0.20895	5
Q9NYP9_112	MIS18A	MS18A_HUMAN Protein Mis18-alpha OS=Homo sapiens OX=9606 GN=MIS18A PE=1 SV=1	C(ITC[C])VSCNVSVDK|C(ITC[C])VSCNVSVDK|||C(ITC[C])VSCNVSVDK|C(ITC[C])VSCNVSVDK||	2|1|||2|2||	1.68|1.65|||2.465|2.545||	0.01414|NA|||0.02121|0.07778||	2.085	0.48623	7
P03243_451		E1B55_ADE05 E1B 55 kDa protein OS=Human adenovirus C serotype 5 OX=28285 PE=1 SV=1	C(ITC[C])RPCECGGK|C(ITC[C])RPCECGGK|||C(ITC[C])RPCECGGK|C(ITC[C])RPCECGGK|C(ITC[C])RPCECGGK|C(ITC[C])RPCECGGK	3|2|||1|4|1|3	2.15|2.22|||2.98|2.475|1.14|1.35	0.03512|0.07071|||NA|0.14104|NA|0.48583	2.0525	0.69318	14
O95197_34	RTN3	RTN3_HUMAN Reticulon-3 OS=Homo sapiens OX=9606 GN=RTN3 PE=1 SV=2	C(ITC[C])PALGTK|C(ITC[C])PALGTK|||C(ITC[C])PALGTK|C(ITC[C])PALGTK||	3|3|||3|3||	2.01|2.06|||2.07|1.83||	0.07371|0.02309|||0.0781|0.26274||	1.9925	0.11147	12
P49189_220	ALDH9A1	AL9A1_HUMAN 4-trimethylaminobutyraldehyde dehydrogenase OS=Homo sapiens OX=9606 GN=ALDH9A1 PE=1 SV=3	|C(ITC[C])QHPDVAK|||C(ITC[C])QHPDVAK|C(ITC[C])QHPDVAK||C(ITC[C])QHPDVAK	|1|||3|1||1	|2.04|||1.96|2.2||0.77	|NA|||0.10017|NA||NA	1.7425	0.65597	6
Q9Y4W2_306	LAS1L	LAS1L_HUMAN Ribosomal biogenesis protein LAS1L OS=Homo sapiens OX=9606 GN=LAS1L PE=1 SV=2	C(ITC[C])VLAELK||||C(ITC[C])VLAELK|C(ITC[C])VLAELK||	1||||6|5||	2.11||||1.505|1.28||	NA||||0.13722|0.04123||	1.63167	0.42925	12
Q9H9B4_284	SFXN1	SFXN1_HUMAN Sideroflexin-1 OS=Homo sapiens OX=9606 GN=SFXN1 PE=1 SV=4	C(ITC[C])ALFPQK|C(ITC[C])ALFPQK|||C(ITC[C])ALFPQK|C(ITC[C])ALFPQK||	2|1|||7|2||	1.34|1.64|||1.82|1.605||	0.35355|NA|||0.07789|0.16263||	1.60125	0.19801	12
Q8N2K0_52	ABHD12	ABD12_HUMAN Lysophosphatidylserine lipase ABHD12 OS=Homo sapiens OX=9606 GN=ABHD12 PE=1 SV=2	C(ITC[C])AADAGMK|C(ITC[C])AADAGMK|C(ITC[C])AADAGMK||C(ITC[C])AADAGMK|||	3|1|1||1|||	1.9|1.7|0.83||1.84|||	0.0|NA|NA||NA|||	1.5675	0.49876	6
Q7Z2W4_38	ZC3HAV1	ZCCHV_HUMAN Zinc finger CCCH-type antiviral protein 1 OS=Homo sapiens OX=9606 GN=ZC3HAV1 PE=1 SV=3	C(ITC[C])EVLQVAGPDR||||C(ITC[C])EVLQVAGPDR|C(ITC[C])EVLQVAGPDR||	1||||1|1||	1.07||||2.13|1.49||	NA||||NA|NA||	1.56333	0.53379	3
Q7Z6K5_183	ARPIN	ARPIN_HUMAN Arpin OS=Homo sapiens OX=9606 GN=ARPIN PE=1 SV=1	C(ITC[C])NFTGDGK|C(ITC[C])NFTGDGK||||C(ITC[C])NFTGDGK||	3|8||||2||	1.53|1.56||||1.59||	0.06|0.04838||||0.15556||	1.56	0.03	13
Q9UBX3_240	SLC25A10	DIC_HUMAN Mitochondrial dicarboxylate carrier OS=Homo sapiens OX=9606 GN=SLC25A10 PE=1 SV=2	C(ITC[C])AVETAK|C(ITC[C])AVETAK|||C(ITC[C])AVETAK|C(ITC[C])AVETAK||	2|2|||2|1||	1.22|1.03|||1.705|2.17||	0.0|0.0|||0.09192|NA||	1.53125	0.51196	7
P16615_997	ATP2A2	AT2A2_HUMAN Sarcoplasmic/endoplasmic reticulum calcium ATPase 2 OS=Homo sapiens OX=9606 GN=ATP2A2 PE=1 SV=1	C(ITC[C])VQPATK|C(ITC[C])VQPATK|||C(ITC[C])VQPATK|C(ITC[C])VQPATK|C(ITC[C])VQPATK|	4|1|||2|3|1|	1.7|1.65|||1.74|1.68|0.79|	0.07703|NA|||0.0|0.12702|NA|	1.512	0.40493	11
Q86Y56_555	DNAAF5	DAAF5_HUMAN Dynein assembly factor 5, axonemal OS=Homo sapiens OX=9606 GN=DNAAF5 PE=1 SV=4	C(ITC[C])QDLYR||||C(ITC[C])QDLYR||C(ITC[C])QDLYR|	2||||1||1|	1.91||||1.65||0.93|	0.0||||NA||NA|	1.49667	0.50767	4
Q29RF7_14	PDS5A	PDS5A_HUMAN Sister chromatid cohesion protein PDS5 homolog A OS=Homo sapiens OX=9606 GN=PDS5A PE=1 SV=1	C(ITC[C])GVVSADGK||||C(ITC[C])GVVSADGK|C(ITC[C])GVVSADGK||	2||||3|1||	1.06||||1.79|1.63||	0.14142||||0.5174|NA||	1.49333	0.38371	6
P31949_13	S100A11	S10AB_HUMAN Protein S100-A11 OS=Homo sapiens OX=9606 GN=S100A11 PE=1 SV=2	||C(ITC[C])IESLIAVFQK|C(ITC[C])IESLIAVFQK|||C(ITC[C])IESLIAVFQK|C(ITC[C])IESLIAVFQK	||1|2|||2|1	||1.04|0.915|||1.54|2.1	||NA|0.16263|||0.0|NA	1.39875	0.53988	6
P78527_111	PRKDC	PRKDC_HUMAN DNA-dependent protein kinase catalytic subunit OS=Homo sapiens OX=9606 GN=PRKDC PE=1 SV=3	C(ITC[C])TSVYTK||C(ITC[C])TSVYTK||C(ITC[C])TSVYTK|C(ITC[C])TSVYTK||	1||1||1|2||	1.81||0.88||0.97|1.74||	NA||NA||NA|0.04243||	1.35	0.49295	5
P04731_44	MT1A	MT1A_HUMAN Metallothionein-1A OS=Homo sapiens OX=9606 GN=MT1A PE=1 SV=2	C(ITC[C])AQGCICK|C(ITC[C])AQGCICK||C(ITC[C])AQGCICK||||	2|1||2||||	1.625|1.5||0.88||||	0.13435|NA||0.0||||	1.335	0.39897	5
Q9H8H0_368	NOL11	NOL11_HUMAN Nucleolar protein 11 OS=Homo sapiens OX=9606 GN=NOL11 PE=1 SV=1	C(ITC[C])GLGFQNSEQSR|C(ITC[C])GLGFQNSEQSR|||C(ITC[C])GLGFQNSEQSR|C(ITC[C])GLGFQNSEQSR||	3|3|||3|3||	1.11|1.81|||1.15|1.27||	2.29042|2.67829|||0.31177|0.29023||	1.335	0.32388	12
Q9NVI1_1158	FANCI	FANCI_HUMAN Fanconi anemia group I protein OS=Homo sapiens OX=9606 GN=FANCI PE=1 SV=4	C(ITC[C])VDTILK|C(ITC[C])VDTILK|||C(ITC[C])VDTILK|C(ITC[C])VDTILK||	1|1|||1|1||	1.52|1.25|||1.41|1.16||	NA|NA|||NA|NA||	1.335	0.16093	4
Q9Y5L0_125	TNPO3	TNPO3_HUMAN Transportin-3 OS=Homo sapiens OX=9606 GN=TNPO3 PE=1 SV=3	||||C(ITC[C])VQTLVEK GC(ITC[C])VQTLVEK|C(ITC[C])VQTLVEK|C(ITC[C])VQTLVEK|	||||2|1|1|	||||1.43|1.32|1.25|	||||0.11314|NA|NA|	1.33333	0.09074	4
Q9Y6G9_51	DYNC1LI1	DC1L1_HUMAN Cytoplasmic dynein 1 light intermediate chain 1 OS=Homo sapiens OX=9606 GN=DYNC1LI1 PE=1 SV=3	C(ITC[C])ILSEVSTR|C(ITC[C])ILSEVSTR|||C(ITC[C])ILSEVSTR|||	1|1|||1|||	1.02|1.42|||1.54|||	NA|NA|||NA|||	1.32667	0.27227	3
Q15392_499	DHCR24	DHC24_HUMAN Delta(24)-sterol reductase OS=Homo sapiens OX=9606 GN=DHCR24 PE=1 SV=2	C(ITC[C])QDAFPEVYDK|C(ITC[C])QDAFPEVYDK||C(ITC[C])QDAFPEVYDK|C(ITC[C])QDAFPEVYDK|C(ITC[C])QDAFPEVYDK|C(ITC[C])QDAFPEVYDK|C(ITC[C])QDAFPEVYDK	1|1||1|1|1|1|2	1.54|1.66||1.02|1.69|1.23|0.99|1.09	NA|NA||NA|NA|NA|NA|0.0	1.31714	0.30571	8
Q15021_286	NCAPD2	CND1_HUMAN Condensin complex subunit 1 OS=Homo sapiens OX=9606 GN=NCAPD2 PE=1 SV=3	C(ITC[C])PQELSR|C(ITC[C])PQELSR|C(ITC[C])PQELSR|C(ITC[C])PQELSR|C(ITC[C])PQELSR|C(ITC[C])PQELSR||	3|3|1|1|4|3||	1.51|1.53|1.04|0.75|1.59|1.43||	0.00577|0.01732|NA|NA|0.04|0.15535||	1.30833	0.33695	15
Q9NSD9_548	FARSB	SYFB_HUMAN Phenylalanine--tRNA ligase beta subunit OS=Homo sapiens OX=9606 GN=FARSB PE=1 SV=3	C(ITC[C])AEIFAR|C(ITC[C])AEIFAR|||||C(ITC[C])AEIFAR|	6|6|||||1|	1.345|1.36|||||1.21|	0.28542|0.19887|||||NA|	1.305	0.08261	13
P0C6X5_644	rep	R1AB_CVHNL Replicase polyprotein 1ab OS=Human coronavirus NL63 OX=277944 GN=rep PE=1 SV=1	GC(ITC[C])SVIVR|GC(ITC[C])SVIVR|||GC(ITC[C])SVIVR|||	1|1|||1|||	1.29|1.24|||1.36|||	NA|NA|||NA|||	1.29667	0.06028	3
O00410_972	IPO5	IPO5_HUMAN Importin-5 OS=Homo sapiens OX=9606 GN=IPO5 PE=1 SV=4	C(ITC[C])ISAVGK|C(ITC[C])ISAVGK|C(ITC[C])ISAVGK|C(ITC[C])ISAVGK|C(ITC[C])ISAVGK|C(ITC[C])ISAVGK|C(ITC[C])ISAVGK|C(ITC[C])ISAVGK	1|3|2|2|4|1|1|1	1.64|1.51|0.93|0.98|1.99|1.85|0.7|0.73	NA|0.05508|0.0|0.0|0.11442|NA|NA|NA	1.29125	0.51574	15
P0DPB5_37	POLR1D	RPC22_HUMAN Protein POLR1D, isoform 2 OS=Homo sapiens OX=9606 GN=POLR1D PE=1 SV=1	C(ITC[C])PLASTNK|C(ITC[C])PLASTNK|||C(ITC[C])PLASTNK|C(ITC[C])PLASTNK||	5|5|||4|2||	1.14|1.03|||1.42|1.54||	0.16355|0.06403|||0.14364|0.19799||	1.2825	0.23754	16
Q02817_712	MUC2	MUC2_HUMAN Mucin-2 OS=Homo sapiens OX=9606 GN=MUC2 PE=1 SV=2	|C(ITC[C])VPIAK||C(ITC[C])VPIAK||C(ITC[C])VPIAK||	|3||2||1||	|1.41||0.72||1.68||	|0.14154||0.0||NA||	1.27	0.49508	6
Q15303_824	ERBB4	ERBB4_HUMAN Receptor tyrosine-protein kinase erbB-4 OS=Homo sapiens OX=9606 GN=ERBB4 PE=1 SV=1	C(ITC[C])VQIAK||||C(ITC[C])VQIAK|C(ITC[C])VQIAK||	2||||1|1||	1.16||||1.17|1.48||	0.01414||||NA|NA||	1.27	0.18193	4
O75534_186	CSDE1	CSDE1_HUMAN Cold shock domain-containing protein E1 OS=Homo sapiens OX=9606 GN=CSDE1 PE=1 SV=2	C(ITC[C])QGVVCAMK|C(ITC[C])QGVVCAMK|C(ITC[C])QGVVCAMK|||||C(ITC[C])QGVVCAMK	3|4|4|||||1	1.7|1.65|0.79|||||0.9	0.06658|0.3332|0.00816|||||NA	1.26	0.48173	12
P78527_1335	PRKDC	PRKDC_HUMAN DNA-dependent protein kinase catalytic subunit OS=Homo sapiens OX=9606 GN=PRKDC PE=1 SV=3	C(ITC[C])TVVVR|C(ITC[C])TVVVR|C(ITC[C])TVVVR||C(ITC[C])TVVVR|||	2|3|1||2|||	1.02|1.1|1.57||1.3|||	0.0|0.00577|NA||0.01414|||	1.2475	0.24514	8
Q96I24_460	FUBP3	FUBP3_HUMAN Far upstream element-binding protein 3 OS=Homo sapiens OX=9606 GN=FUBP3 PE=1 SV=2	C(ITC[C])FPNMAAK|C(ITC[C])FPNMAAK|||C(ITC[C])FPNMAAK|C(ITC[C])FPNMAAK||	3|7|||4|1||	1.39|1.36|||1.12|1.11||	0.25403|0.32898|||0.02944|NA||	1.245	0.15067	15
Q15758_363	SLC1A5	AAAT_HUMAN Neutral amino acid transporter B(0) OS=Homo sapiens OX=9606 GN=SLC1A5 PE=1 SV=2	C(ITC[C])VEENNGVAK|C(ITC[C])VEENNGVAK||C(ITC[C])VEENNGVAK|C(ITC[C])VEENNGVAK|C(ITC[C])VEENNGVAK||	1|2||1|1|1||	1.3|1.215||0.75|1.46|1.49||	NA|0.03536||NA|NA|NA||	1.243	0.29798	6
Q99733_77	NAP1L4	NP1L4_HUMAN Nucleosome assembly protein 1-like 4 OS=Homo sapiens OX=9606 GN=NAP1L4 PE=1 SV=1	C(ITC[C])AHIEAK|C(ITC[C])AHIEAK||C(ITC[C])AHIEAK|C(ITC[C])AHIEAK|C(ITC[C])AHIEAK||	3|3||1|1|1||	1.56|1.33||1.29|1.12|0.91||	0.12583|0.01732||NA|NA|NA||	1.242	0.24304	9
Q9NZB2_919	FAM120A	F120A_HUMAN Constitutive coactivator of PPAR-gamma-like protein 1 OS=Homo sapiens OX=9606 GN=FAM120A PE=1 SV=2	C(ITC[C])GAFSGSDSSR|C(ITC[C])GAFSGSDSSR|||C(ITC[C])GAFSGSDSSR|||	2|2|||1|||	1.35|1.125|||1.23|||	0.02828|0.03536|||NA|||	1.235	0.11258	5
O95299_253	NDUFA10	NDUAA_HUMAN NADH dehydrogenase [ubiquinone] 1 alpha subcomplex subunit 10, mitochondrial OS=Homo sapiens OX=9606 GN=NDUFA10 PE=1 SV=1	C(ITC[C])EVLQYSAR|C(ITC[C])EVLQYSAR|||||C(ITC[C])EVLQYSAR|	3|4|||||1|	1.19|0.88|||||1.61|	0.01732|0.0|||||NA|	1.22667	0.36638	8
P45880_13	VDAC2	VDAC2_HUMAN Voltage-dependent anion-selective channel protein 2 OS=Homo sapiens OX=9606 GN=VDAC2 PE=1 SV=2	C(ITC[C])IPPSYADLGK|C(ITC[C])IPPSYADLGK|||C(ITC[C])IPPSYADLGK|C(ITC[C])IPPSYADLGK|C(ITC[C])IPPSYADLGK|C(ITC[C])IPPSYADLGK	2|1|||3|3|2|2	1.59|1.07|||1.77|1.56|0.675|0.685	0.12728|NA|||0.06|0.4373|0.09192|0.12021	1.225	0.48179	13
Q6GMV1_92	ALG1L	ALG1L_HUMAN Putative glycosyltransferase ALG1-like OS=Homo sapiens OX=9606 GN=ALG1L PE=2 SV=2	C(ITC[C])LHELVK|C(ITC[C])LHELVK||C(ITC[C])LHELVK|C(ITC[C])LHELVK|C(ITC[C])LHELVK||	2|2||1|1|2||	1.34|1.39||0.74|1.43|1.225||	0.02828|0.18385||NA|NA|0.5869||	1.225	0.28182	8
Q9UPU5_179	USP24	UBP24_HUMAN Ubiquitin carboxyl-terminal hydrolase 24 OS=Homo sapiens OX=9606 GN=USP24 PE=1 SV=3	C(ITC[C])MPEAFK|C(ITC[C])MPEAFK|C(ITC[C])MPEAFK|C(ITC[C])MPEAFK|C(ITC[C])MPEAFK|||	1|1|2|2|2|||	1.53|1.11|1.015|0.985|1.475|||	NA|NA|0.27577|0.09192|0.62933|||	1.223	0.26001	8
Q9Y6E2_97	BZW2	BZW2_HUMAN Basic leucine zipper and W2 domain-containing protein 2 OS=Homo sapiens OX=9606 GN=BZW2 PE=1 SV=1	C(ITC[C])VFSANEDHETIR|C(ITC[C])VFSANEDHETIR|C(ITC[C])VFSANEDHETIR||C(ITC[C])VFSANEDHETIR|||	1|1|1||1|||	1.47|1.51|0.84||1.07|||	NA|NA|NA||NA|||	1.2225	0.32325	4
Q96T17_278	MAP7D2	MA7D2_HUMAN MAP7 domain-containing protein 2 OS=Homo sapiens OX=9606 GN=MAP7D2 PE=1 SV=2	C(ITC[C])EFSGGIPK|C(ITC[C])EFSGGIPK|||C(ITC[C])EFSGGIPK|C(ITC[C])EFSGGIPK||	1|1|||1|2||	1.29|1.0|||1.25|1.32||	NA|NA|||NA|0.0||	1.215	0.14617	5
O43592_877	XPOT	XPOT_HUMAN Exportin-T OS=Homo sapiens OX=9606 GN=XPOT PE=1 SV=2	C(ITC[C])FLAPLK|C(ITC[C])FLAPLK|||C(ITC[C])FLAPLK|C(ITC[C])FLAPLK|C(ITC[C])FLAPLK|C(ITC[C])FLAPLK	6|7|||7|9|1|1	1.235|1.41|||1.44|1.63|0.65|0.9	0.08931|0.19178|||0.1376|0.09874|NA|NA	1.21083	0.36868	31
P38606_394	ATP6V1A	VATA_HUMAN V-type proton ATPase catalytic subunit A OS=Homo sapiens OX=9606 GN=ATP6V1A PE=1 SV=2	|C(ITC[C])LGNPER|C(ITC[C])LGNPER||C(ITC[C])LGNPER|||	|1|1||1|||	|1.68|0.95||1.0|||	|NA|NA||NA|||	1.21	0.4078	3
Q9UHR5_127	SAP30BP	S30BP_HUMAN SAP30-binding protein OS=Homo sapiens OX=9606 GN=SAP30BP PE=1 SV=1	C(ITC[C])SNHLQDK|C(ITC[C])SNHLQDK|C(ITC[C])SNHLQDK|C(ITC[C])SNHLQDK|C(ITC[C])SNHLQDK|||	1|1|3|2|4|||	1.57|1.1|0.78|0.87|1.65|||	NA|NA|0.0|0.0|0.53749|||	1.194	0.39828	11
P53621_1185	COPA	COPA_HUMAN Coatomer subunit alpha OS=Homo sapiens OX=9606 GN=COPA PE=1 SV=2	C(ITC[C])PLSGACYSPEFK|C(ITC[C])PLSGACYSPEFK|C(ITC[C])PLSGACYSPEFK|||||	4|1|3|||||	1.315|1.25|1.01|||||	0.14434|NA|0.15177|||||	1.19167	0.16065	8
Q12769_1166	NUP160	NU160_HUMAN Nuclear pore complex protein Nup160 OS=Homo sapiens OX=9606 GN=NUP160 PE=1 SV=3	C(ITC[C])TAAPTNR|C(ITC[C])TAAPTNR|||C(ITC[C])TAAPTNR|C(ITC[C])TAAPTNR||	3|2|||2|2||	1.09|1.1|||1.34|1.23||	0.02887|0.07071|||0.0|0.0||	1.19	0.1186	9
Q99460_104	PSMD1	PSMD1_HUMAN 26S proteasome non-ATPase regulatory subunit 1 OS=Homo sapiens OX=9606 GN=PSMD1 PE=1 SV=2	|C(ITC[C])IDHYTK||C(ITC[C])IDHYTK|C(ITC[C])IDHYTK|||	|2||1|1|||	|1.24||0.84|1.48|||	|0.0||NA|NA|||	1.18667	0.32332	4
P23919_163	DTYMK	KTHY_HUMAN Thymidylate kinase OS=Homo sapiens OX=9606 GN=DTYMK PE=1 SV=4	C(ITC[C])FHQLMK|C(ITC[C])FHQLMK|C(ITC[C])FHQLMK|C(ITC[C])FHQLMK|C(ITC[C])FHQLMK|C(ITC[C])FHQLMK|C(ITC[C])FHQLMK|	4|1|1|2|4|4|2|	1.34|1.25|0.81|0.76|1.57|1.74|0.77|	0.33907|NA|NA|0.02828|0.17397|0.0877|0.16971|	1.17714	0.40364	18
Q9NRZ9_205	HELLS	HELLS_HUMAN Lymphoid-specific helicase OS=Homo sapiens OX=9606 GN=HELLS PE=1 SV=1	C(ITC[C])NGQPVPFQQPK|C(ITC[C])NGQPVPFQQPK||C(ITC[C])NGQPVPFQQPK|C(ITC[C])NGQPVPFQQPK||C(ITC[C])NGQPVPFQQPK|C(ITC[C])NGQPVPFQQPK	1|1||1|1||1|1	1.75|1.65||0.84|0.72||1.25|0.84	NA|NA||NA|NA||NA|NA	1.175	0.44572	6
Q9NVA2_46	SEPTIN11	SEP11_HUMAN Septin-11 OS=Homo sapiens OX=9606 GN=SEPTIN11 PE=1 SV=3	C(ITC[C])VGETGIGK|C(ITC[C])VGETGIGK|||C(ITC[C])VGETGIGK|C(ITC[C])VGETGIGK||	1|1|||3|2||	1.17|1.1|||1.2|1.22||	NA|NA|||0.1097|0.07071||	1.1725	0.05252	7
O43815_765	STRN	STRN_HUMAN Striatin OS=Homo sapiens OX=9606 GN=STRN PE=1 SV=4	C(ITC[C])YIASAGADALAK|C(ITC[C])YIASAGADALAK|C(ITC[C])YIASAGADALAK|C(ITC[C])YIASAGADALAK|C(ITC[C])YIASAGADALAK|C(ITC[C])YIASAGADALAK||	4|2|2|1|1|1||	1.225|1.33|0.645|1.17|1.63|0.97||	0.06185|0.0|0.0495|NA|NA|NA||	1.16167	0.3333	11
Q00765_18	REEP5	REEP5_HUMAN Receptor expression-enhancing protein 5 OS=Homo sapiens OX=9606 GN=REEP5 PE=1 SV=3	C(ITC[C])MTDLLAK|C(ITC[C])MTDLLAK|||C(ITC[C])MTDLLAK|C(ITC[C])MTDLLAK|C(ITC[C])MTDLLAK|C(ITC[C])MTDLLAK	6|5|||6|7|2|1	1.39|1.36|||1.425|1.18|0.925|0.68	0.38318|0.09711|||0.14497|0.34312|0.02121|NA	1.16	0.29972	27
P49790_404	NUP153	NU153_HUMAN Nuclear pore complex protein Nup153 OS=Homo sapiens OX=9606 GN=NUP153 PE=1 SV=2	C(ITC[C])STGYEK|C(ITC[C])STGYEK||||C(ITC[C])STGYEK||	1|3||||1||	1.14|1.03||||1.31||	NA|0.07506||||NA||	1.16	0.14107	5
Q2NL82_753	TSR1	TSR1_HUMAN Pre-rRNA-processing protein TSR1 homolog OS=Homo sapiens OX=9606 GN=TSR1 PE=1 SV=1	C(ITC[C])SFDGK|C(ITC[C])SFDGK|||||C(ITC[C])SFDGK|	2|1|||||1|	1.36|1.33|||||0.77|	0.02828|NA|||||NA|	1.15333	0.33232	4
Q12923_324	PTPN13	PTN13_HUMAN Tyrosine-protein phosphatase non-receptor type 13 OS=Homo sapiens OX=9606 GN=PTPN13 PE=1 SV=2	|C(ITC[C])HPEAVTVR||C(ITC[C])HPEAVTVR||C(ITC[C])HPEAVTVR||	|2||1||1||	|1.06||0.84||1.54||	|0.3677||NA||NA||	1.14667	0.35796	4
P60059_25	SEC61G	SC61G_HUMAN Protein transport protein Sec61 subunit gamma OS=Homo sapiens OX=9606 GN=SEC61G PE=1 SV=1	|||C(ITC[C])TKPDR|C(ITC[C])TKPDR|C(ITC[C])TKPDR||	|||2|1|2||	|||0.75|1.29|1.4||	|||0.07071|NA|0.02828||	1.14667	0.3479	5
P49411_147	TUFM	EFTU_HUMAN Elongation factor Tu, mitochondrial OS=Homo sapiens OX=9606 GN=TUFM PE=1 SV=2	|C(ITC[C])ILVVAANDGPMPQTR|C(ITC[C])ILVVAANDGPMPQTR|C(ITC[C])ILVVAANDGPMPQTR||||C(ITC[C])ILVVAANDGPMPQTR	|1|2|1||||2	|1.09|0.8|0.96||||1.715	|NA|0.04243|NA||||0.12021	1.14125	0.40047	6
P49327_1759	FASN	FAS_HUMAN Fatty acid synthase OS=Homo sapiens OX=9606 GN=FASN PE=1 SV=3	C(ITC[C])LATHGR|C(ITC[C])LATHGR|||C(ITC[C])LATHGR|C(ITC[C])LATHGR|C(ITC[C])LATHGR|	6|1|||1|3|1|	1.5|1.19|||1.11|1.1|0.8|	0.17953|NA|||NA|0.23671|NA|	1.14	0.2501	12
P07814_1487	EPRS1	SYEP_HUMAN Bifunctional glutamate/proline--tRNA ligase OS=Homo sapiens OX=9606 GN=EPRS1 PE=1 SV=5	C(ITC[C])ELQPGAK||||C(ITC[C])ELQPGAK|C(ITC[C])ELQPGAK||	2||||3|7||	1.525||||0.93|0.96||	0.17678||||0.11358|0.04018||	1.13833	0.3352	12
Q12789_1091	GTF3C1	TF3C1_HUMAN General transcription factor 3C polypeptide 1 OS=Homo sapiens OX=9606 GN=GTF3C1 PE=1 SV=4	C(ITC[C])AMLEYTTGSR|C(ITC[C])AMLEYTTGSR|C(ITC[C])AMLEYTTGSR||C(ITC[C])AMLEYTTGSR|C(ITC[C])AMLEYTTGSR||	4|3|1||1|1||	1.175|1.07|0.75||1.53|1.16||	0.10424|0.08185|NA||NA|NA||	1.137	0.27869	10
P25398_69	RPS12	RS12_HUMAN 40S ribosomal protein S12 OS=Homo sapiens OX=9606 GN=RPS12 PE=1 SV=3	C(ITC[C])AEHQINLIK||||C(ITC[C])AEHQINLIK|C(ITC[C])AEHQINLIK||	1||||2|2||	0.85||||1.255|1.305||	NA||||0.06364|0.02121||	1.13667	0.24952	5
P52948_1347	NUP98	NUP98_HUMAN Nuclear pore complex protein Nup98-Nup96 OS=Homo sapiens OX=9606 GN=NUP98 PE=1 SV=4	C(ITC[C])SLAQQSGDHR|C(ITC[C])SLAQQSGDHR|||C(ITC[C])SLAQQSGDHR|||	1|1|||1|||	1.1|1.38|||0.93|||	NA|NA|||NA|||	1.13667	0.22723	3
P33947_29	KDELR2	ERD22_HUMAN ER lumen protein-retaining receptor 2 OS=Homo sapiens OX=9606 GN=KDELR2 PE=1 SV=1	SC(ITC[C])AGISGK C(ITC[C])AGISGK|SC(ITC[C])AGISGK C(ITC[C])AGISGK|SC(ITC[C])AGISGK C(ITC[C])AGISGK|C(ITC[C])AGISGK|SC(ITC[C])AGISGK C(ITC[C])AGISGK|SC(ITC[C])AGISGK C(ITC[C])AGISGK||	6|11|6|1|6|3||	1.29|1.24|0.66|0.65|1.665|1.31||	0.11125|0.0867|0.20925|NA|0.07305|0.3646||	1.13583	0.40185	33
Q5MNZ6_63	WDR45B	WIPI3_HUMAN WD repeat domain phosphoinositide-interacting protein 3 OS=Homo sapiens OX=9606 GN=WDR45B PE=1 SV=2	C(ITC[C])NYLALVGGGK|C(ITC[C])NYLALVGGGK|C(ITC[C])NYLALVGGGK|C(ITC[C])NYLALVGGGK|C(ITC[C])NYLALVGGGK|C(ITC[C])NYLALVGGGK||	2|2|1|3|1|1||	1.14|1.175|0.95|0.87|1.33|1.35||	0.08485|0.03536|NA|0.0|NA|NA||	1.13583	0.1951	10
P33992_397	MCM5	MCM5_HUMAN DNA replication licensing factor MCM5 OS=Homo sapiens OX=9606 GN=MCM5 PE=1 SV=5	C(ITC[C])SPIGVYTSGK|C(ITC[C])SPIGVYTSGK|C(ITC[C])SPIGVYTSGK|C(ITC[C])SPIGVYTSGK|||C(ITC[C])SPIGVYTSGK|C(ITC[C])SPIGVYTSGK	2|2|4|3|||1|1	1.565|1.285|0.76|0.78|||1.63|0.72	0.19092|0.09192|0.07228|0.06429|||NA|NA	1.12333	0.42202	13
P46013_824	MKI67	KI67_HUMAN Proliferation marker protein Ki-67 OS=Homo sapiens OX=9606 GN=MKI67 PE=1 SV=2	C(ITC[C])SASPPLR|C(ITC[C])SASPPLR||C(ITC[C])SASPPLR|C(ITC[C])SASPPLR|C(ITC[C])SASPPLR||	8|7||1|4|4||	1.05|1.17||0.74|1.31|1.345||	0.12369|0.06309||NA|0.08995|0.22381||	1.123	0.24417	24
Q92973_620	TNPO1	TNPO1_HUMAN Transportin-1 OS=Homo sapiens OX=9606 GN=TNPO1 PE=1 SV=2	C(ITC[C])VNLVQK|C(ITC[C])VNLVQK|C(ITC[C])VNLVQK||C(ITC[C])VNLVQK|C(ITC[C])VNLVQK||	4|4|1||3|4||	1.01|1.0|1.13||1.41|1.065||	0.01732|0.025|NA||0.16197|0.49956||	1.123	0.16858	16
Q14687_777	GSE1	GSE1_HUMAN Genetic suppressor element 1 OS=Homo sapiens OX=9606 GN=GSE1 PE=1 SV=3	C(ITC[C])VAEQPPLK|C(ITC[C])VAEQPPLK||C(ITC[C])VAEQPPLK||||	1|1||1||||	1.59|0.82||0.93||||	NA|NA||NA||||	1.11333	0.41645	3
Q9H974_312	QTRT2	QTRT2_HUMAN Queuine tRNA-ribosyltransferase accessory subunit 2 OS=Homo sapiens OX=9606 GN=QTRT2 PE=1 SV=1	C(ITC[C])MDQIK|C(ITC[C])MDQIK|||C(ITC[C])MDQIK|C(ITC[C])MDQIK||	2|2|||1|1||	0.97|0.99|||1.46|1.03||	0.04243|0.02828|||NA|NA||	1.1125	0.23301	6
P46087_487	NOP2	NOP2_HUMAN Probable 28S rRNA (cytosine(4447)-C(5))-methyltransferase OS=Homo sapiens OX=9606 GN=NOP2 PE=1 SV=2	C(ITC[C])AHLQK|C(ITC[C])AHLQK|||C(ITC[C])AHLQK|||	4|3|||1|||	1.07|1.09|||1.17|||	0.02986|0.02887|||NA|||	1.11	0.05292	8
P68363_295	TUBA1B	TBA1B_HUMAN Tubulin alpha-1B chain OS=Homo sapiens OX=9606 GN=TUBA1B PE=1 SV=1	C(ITC[C])FEPANQMVK|C(ITC[C])FEPANQMVK|||C(ITC[C])FEPANQMVK|C(ITC[C])FEPANQMVK|C(ITC[C])FEPANQMVK|C(ITC[C])FEPANQMVK	10|13|||13|12|7|9	1.465|1.47|||1.14|1.195|0.7|0.68	0.12432|0.0815|||0.21042|0.12438|0.10431|0.03041	1.10833	0.35121	64
P29372_61	MPG	3MG_HUMAN DNA-3-methyladenine glycosylase OS=Homo sapiens OX=9606 GN=MPG PE=1 SV=3	C(ITC[C])LGPPTTPGPYR|C(ITC[C])LGPPTTPGPYR|||C(ITC[C])LGPPTTPGPYR||C(ITC[C])LGPPTTPGPYR|	2|4|||2||1|	0.965|1.215|||1.17||1.08|	0.03536|0.08981|||0.02828||NA|	1.1075	0.11034	9
Q9NYP9_25	MIS18A	MS18A_HUMAN Protein Mis18-alpha OS=Homo sapiens OX=9606 GN=MIS18A PE=1 SV=1	C(ITC[C])SDSSLLGK|C(ITC[C])SDSSLLGK||C(ITC[C])SDSSLLGK||||	3|3||1||||	1.36|1.18||0.78||||	0.0|0.0||NA||||	1.10667	0.29687	7
P55060_272	CSE1L	XPO2_HUMAN Exportin-2 OS=Homo sapiens OX=9606 GN=CSE1L PE=1 SV=3	|C(ITC[C])DNAALYAQK|C(ITC[C])DNAALYAQK|||C(ITC[C])DNAALYAQK||	|1|1|||1||	|0.93|0.99|||1.4||	|NA|NA|||NA||	1.10667	0.2558	3
P09874_24	PARP1	PARP1_HUMAN Poly [ADP-ribose] polymerase 1 OS=Homo sapiens OX=9606 GN=PARP1 PE=1 SV=4	C(ITC[C])SESIPK|C(ITC[C])SESIPK|C(ITC[C])SESIPK|C(ITC[C])SESIPK||||	8|7|3|2||||	1.37|1.34|0.85|0.85||||	0.12906|0.10012|0.04619|0.04243||||	1.1025	0.29182	20
Q9NVU0_553	POLR3E	RPC5_HUMAN DNA-directed RNA polymerase III subunit RPC5 OS=Homo sapiens OX=9606 GN=POLR3E PE=1 SV=1	C(ITC[C])ASTPVAR||C(ITC[C])ASTPVAR||C(ITC[C])ASTPVAR|||	1||1||1|||	1.27||0.81||1.22|||	NA||NA||NA|||	1.1	0.25239	3
P55072_415	VCP	TERA_HUMAN Transitional endoplasmic reticulum ATPase OS=Homo sapiens OX=9606 GN=VCP PE=1 SV=4	C(ITC[C])SEAALQAIR||||C(ITC[C])SEAALQAIR||C(ITC[C])SEAALQAIR|C(ITC[C])SEAALQAIR	1||||1||1|1	0.94||||1.45||1.14|0.86	NA||||NA||NA|NA	1.0975	0.26285	4
Q06330_454	RBPJ	SUH_HUMAN Recombining binding protein suppressor of hairless OS=Homo sapiens OX=9606 GN=RBPJ PE=1 SV=3	C(ITC[C])SAAGAILR|C(ITC[C])SAAGAILR|||C(ITC[C])SAAGAILR|C(ITC[C])SAAGAILR||	1|1|||1|1||	0.95|0.98|||1.11|1.35||	NA|NA|||NA|NA||	1.0975	0.18209	4
O15270_438	SPTLC2	SPTC2_HUMAN Serine palmitoyltransferase 2 OS=Homo sapiens OX=9606 GN=SPTLC2 PE=1 SV=1	|C(ITC[C])VQQLAENTR|||C(ITC[C])VQQLAENTR|C(ITC[C])VQQLAENTR||	|1|||1|1||	|0.69|||1.3|1.29||	|NA|||NA|NA||	1.09333	0.34933	3
O60343_74	TBC1D4	TBCD4_HUMAN TBC1 domain family member 4 OS=Homo sapiens OX=9606 GN=TBC1D4 PE=1 SV=2	C(ITC[C])GAPAAR|C(ITC[C])GAPAAR|||C(ITC[C])GAPAAR|C(ITC[C])GAPAAR||	3|2|||2|3||	1.05|1.06|||1.16|1.08||	0.00577|0.01414|||0.09899|0.08737||	1.0875	0.04992	10
Q96RU2_952	USP28	UBP28_HUMAN Ubiquitin carboxyl-terminal hydrolase 28 OS=Homo sapiens OX=9606 GN=USP28 PE=1 SV=1	C(ITC[C])LLELNAK|C(ITC[C])LLELNAK|||C(ITC[C])LLELNAK|||	1|2|||1|||	1.07|1.11|||1.08|||	NA|0.0|||NA|||	1.08667	0.02082	4
Q92616_2558	GCN1	GCN1_HUMAN eIF-2-alpha kinase activator GCN1 OS=Homo sapiens OX=9606 GN=GCN1 PE=1 SV=6	C(ITC[C])LQNPSSDIR|C(ITC[C])LQNPSSDIR|C(ITC[C])LQNPSSDIR|C(ITC[C])LQNPSSDIR|C(ITC[C])LQNPSSDIR|C(ITC[C])LQNPSSDIR|C(ITC[C])LQNPSSDIR|C(ITC[C])LQNPSSDIR	3|3|1|3|2|2|2|5	1.37|1.31|0.87|0.71|1.36|1.39|0.81|0.87	0.09539|0.04163|NA|0.17926|0.05657|0.02828|0.14142|0.02864	1.08625	0.295	21
Q9Y490_1087	TLN1	TLN1_HUMAN Talin-1 OS=Homo sapiens OX=9606 GN=TLN1 PE=1 SV=3	C(ITC[C])TQDLGNSTK|C(ITC[C])TQDLGNSTK||C(ITC[C])TQDLGNSTK||||	1|1||2||||	1.26|1.28||0.71||||	NA|NA||0.0||||	1.08333	0.32347	4
Q32MZ4_750	LRRFIP1	LRRF1_HUMAN Leucine-rich repeat flightless-interacting protein 1 OS=Homo sapiens OX=9606 GN=LRRFIP1 PE=1 SV=2	C(ITC[C])EMSEHPSQTVR|C(ITC[C])EMSEHPSQTVR|C(ITC[C])EMSEHPSQTVR||C(ITC[C])EMSEHPSQTVR|||	1|3|2||1|||	0.99|0.91|1.05||1.38|||	NA|0.10392|0.0||NA|||	1.0825	0.20646	7
P38646_66	HSPA9	GRP75_HUMAN Stress-70 protein, mitochondrial OS=Homo sapiens OX=9606 GN=HSPA9 PE=1 SV=2	C(ITC[C])VAVMEGK|C(ITC[C])VAVMEGK|||C(ITC[C])VAVMEGK|C(ITC[C])VAVMEGK||	1|1|||1|1||	1.03|1.08|||1.18|1.04||	NA|NA|||NA|NA||	1.0825	0.0685	4
P09960_26	LTA4H	LKHA4_HUMAN Leukotriene A-4 hydrolase OS=Homo sapiens OX=9606 GN=LTA4H PE=1 SV=2	C(ITC[C])SVDFTR|C(ITC[C])SVDFTR|C(ITC[C])SVDFTR|C(ITC[C])SVDFTR||||	1|7|2|1||||	1.24|1.28|0.93|0.86||||	NA|0.25706|0.12728|NA||||	1.0775	0.21329	11
Q13616_355	CUL1	CUL1_HUMAN Cullin-1 OS=Homo sapiens OX=9606 GN=CUL1 PE=1 SV=2	C(ITC[C])GEAALNDPK|C(ITC[C])GEAALNDPK|C(ITC[C])GEAALNDPK|||||	1|3|1|||||	0.76|1.21|1.26|||||	NA|0.04619|NA|||||	1.07667	0.27538	5
Q92616_1595	GCN1	GCN1_HUMAN eIF-2-alpha kinase activator GCN1 OS=Homo sapiens OX=9606 GN=GCN1 PE=1 SV=6	C(ITC[C])LQTLLDTK|C(ITC[C])LQTLLDTK|C(ITC[C])LQTLLDTK|C(ITC[C])LQTLLDTK|C(ITC[C])LQTLLDTK|C(ITC[C])LQTLLDTK|C(ITC[C])LQTLLDTK|C(ITC[C])LQTLLDTK	3|5|4|7|3|3|2|3	1.18|1.66|0.84|0.8|0.65|1.73|0.77|0.98	0.57507|0.45219|0.03403|0.10463|0.8199|0.48497|0.0|0.04619	1.07625	0.41331	30
P23528_147	CFL1	COF1_HUMAN Cofilin-1 OS=Homo sapiens OX=9606 GN=CFL1 PE=1 SV=3	C(ITC[C])TLAEK|C(ITC[C])TLAEK|C(ITC[C])TLAEK|C(ITC[C])TLAEK|C(ITC[C])TLAEK||C(ITC[C])TLAEK|	5|7|2|3|1||1|	0.84|0.84|0.765|0.83|1.82||1.36|	0.01817|0.04259|0.00707|0.04619|NA||NA|	1.07583	0.42493	19
P40429_38	RPL13A	RL13A_HUMAN 60S ribosomal protein L13a OS=Homo sapiens OX=9606 GN=RPL13A PE=1 SV=2	C(ITC[C])EGINISGNFYR|C(ITC[C])EGINISGNFYR|C(ITC[C])EGINISGNFYR|C(ITC[C])EGINISGNFYR|C(ITC[C])EGINISGNFYR|||C(ITC[C])EGINISGNFYR	3|3|3|3|1|||1	1.59|1.36|0.71|0.73|1.11|||0.95	0.1365|0.15695|0.02517|0.04359|NA|||NA	1.075	0.35087	14
P78527_1128	PRKDC	PRKDC_HUMAN DNA-dependent protein kinase catalytic subunit OS=Homo sapiens OX=9606 GN=PRKDC PE=1 SV=3	||C(ITC[C])DAIDHLCR||C(ITC[C])DAIDHLCR||C(ITC[C])DAIDHLCR|	||1||2||1|	||1.02||1.075||1.13|	||NA||0.00707||NA|	1.075	0.055	4
Q96C01_57	FAM136A	F136A_HUMAN Protein FAM136A OS=Homo sapiens OX=9606 GN=FAM136A PE=1 SV=1	||C(ITC[C])HVPLAQAQALVTSELEK|C(ITC[C])HVPLAQAQALVTSELEK|||C(ITC[C])HVPLAQAQALVTSELEK|	||8|10|||1|	||0.88|0.96|||1.38|	||0.12748|0.16739|||NA|	1.07333	0.26858	19
P68363_347	TUBA1B	TBA1B_HUMAN Tubulin alpha-1B chain OS=Homo sapiens OX=9606 GN=TUBA1B PE=1 SV=1	C(ITC[C])PTGFK|C(ITC[C])PTGFK|||C(ITC[C])PTGFK|C(ITC[C])PTGFK||	3|2|||1|3||	1.06|1.065|||1.04|1.12||	0.03464|0.02121|||NA|0.01528||	1.07125	0.03425	9
P07195_36	LDHB	LDHB_HUMAN L-lactate dehydrogenase B chain OS=Homo sapiens OX=9606 GN=LDHB PE=1 SV=2	||||C(ITC[C])AISILGK|C(ITC[C])AISILGK|C(ITC[C])AISILGK|C(ITC[C])AISILGK	||||3|3|2|2	||||1.33|1.45|0.72|0.78	||||0.17616|0.12342|0.04243|0.16971	1.07	0.37354	10
P46782_66	RPS5	RS5_HUMAN 40S ribosomal protein S5 OS=Homo sapiens OX=9606 GN=RPS5 PE=1 SV=4	C(ITC[C])PIVER|C(ITC[C])PIVER|||C(ITC[C])PIVER|C(ITC[C])PIVER||	1|1|||2|1||	1.03|1.09|||0.97|1.19||	NA|NA|||0.05657|NA||	1.07	0.09381	5
Q15393_547	SF3B3	SF3B3_HUMAN Splicing factor 3B subunit 3 OS=Homo sapiens OX=9606 GN=SF3B3 PE=1 SV=4	C(ITC[C])AVNQR|C(ITC[C])AVNQR|||C(ITC[C])AVNQR|C(ITC[C])AVNQR|C(ITC[C])AVNQR|	4|3|||1|1|1|	1.135|1.12|||1.23|1.19|0.66|	0.03948|0.02309|||NA|NA|NA|	1.067	0.23172	10
Q9NYZ3_198	GTSE1	GTSE1_HUMAN G2 and S phase-expressed protein 1 OS=Homo sapiens OX=9606 GN=GTSE1 PE=1 SV=3	|C(ITC[C])TAHAASQAATQR|C(ITC[C])TAHAASQAATQR|C(ITC[C])TAHAASQAATQR||||	|1|1|1||||	|1.44|0.93|0.83||||	|NA|NA|NA||||	1.06667	0.32716	3
P52597_267	HNRNPF	HNRPF_HUMAN Heterogeneous nuclear ribonucleoprotein F OS=Homo sapiens OX=9606 GN=HNRNPF PE=1 SV=3	C(ITC[C])LSGMYDHR|C(ITC[C])LSGMYDHR|C(ITC[C])LSGMYDHR|||C(ITC[C])LSGMYDHR||	2|1|1|||2||	0.975|1.04|0.83|||1.42||	0.03536|NA|NA|||0.0||	1.06625	0.25164	6
O15027_1522	SEC16A	SC16A_HUMAN Protein transport protein Sec16A OS=Homo sapiens OX=9606 GN=SEC16A PE=1 SV=4	C(ITC[C])LQNENLIDK|C(ITC[C])LQNENLIDK||C(ITC[C])LQNENLIDK|C(ITC[C])LQNENLIDK|||	2|2||2|1|||	0.87|0.96||0.805|1.62|||	0.07071|0.05657||0.10607|NA|||	1.06375	0.37624	7
P67870_140	CSNK2B	CSK2B_HUMAN Casein kinase II subunit beta OS=Homo sapiens OX=9606 GN=CSNK2B PE=1 SV=1	C(ITC[C])MDVYTPK|C(ITC[C])MDVYTPK|C(ITC[C])MDVYTPK|||||	1|5|1|||||	1.26|1.2|0.73|||||	NA|0.10756|NA|||||	1.06333	0.29023	7
O15226_37	NKRF	NKRF_HUMAN NF-kappa-B-repressing factor OS=Homo sapiens OX=9606 GN=NKRF PE=1 SV=2	C(ITC[C])DGQNPPKK||||C(ITC[C])DGQNPPKK|C(ITC[C])DGQNPPKK||	1||||4|4||	1.42||||0.955|0.81||	NA||||0.02754|0.02828||	1.06167	0.31868	9
P07900_420	HSP90AA1	HS90A_HUMAN Heat shock protein HSP 90-alpha OS=Homo sapiens OX=9606 GN=HSP90AA1 PE=1 SV=5	C(ITC[C])LELFTELAEDKENYK||C(ITC[C])LELFTELAEDKENYKK C(ITC[C])LELFTELAEDKENYK|C(ITC[C])LELFTELAEDKENYK C(ITC[C])LELFTELAEDK||||	1||3|5||||	0.75||1.24|1.18||||	NA||0.30022|0.10257||||	1.05667	0.26727	9
Q86VP6_71	CAND1	CAND1_HUMAN Cullin-associated NEDD8-dissociated protein 1 OS=Homo sapiens OX=9606 GN=CAND1 PE=1 SV=2	C(ITC[C])LGPLVSK|C(ITC[C])LGPLVSK|||C(ITC[C])LGPLVSK|C(ITC[C])LGPLVSK||	4|8|||4|1||	1.05|1.08|||0.995|1.1||	0.0526|0.04504|||0.08505|NA||	1.05625	0.04571	17
Q15269_158	PWP2	PWP2_HUMAN Periodic tryptophan protein 2 homolog OS=Homo sapiens OX=9606 GN=PWP2 PE=2 SV=2	C(ITC[C])FVVGSK|C(ITC[C])FVVGSK||C(ITC[C])FVVGSK||||	2|1||1||||	0.925|1.25||0.99||||	0.44548|NA||NA||||	1.055	0.17197	4
Q96RN5_588	MED15	MED15_HUMAN Mediator of RNA polymerase II transcription subunit 15 OS=Homo sapiens OX=9606 GN=MED15 PE=1 SV=2	C(ITC[C])EIALEK|C(ITC[C])EIALEK|C(ITC[C])EIALEK||C(ITC[C])EIALEK|||	1|4|1||1|||	1.04|1.265|0.77||1.14|||	NA|0.48273|NA||NA|||	1.05375	0.21037	7
O43264_404	ZW10	ZW10_HUMAN Centromere/kinetochore protein zw10 homolog OS=Homo sapiens OX=9606 GN=ZW10 PE=1 SV=3	|C(ITC[C])QDVIVAAR|||C(ITC[C])QDVIVAAR|C(ITC[C])QDVIVAAR||	|3|||1|1||	|0.98|||0.95|1.23||	|0.10149|||NA|NA||	1.05333	0.15373	5
O60566_700	BUB1B	BUB1B_HUMAN Mitotic checkpoint serine/threonine-protein kinase BUB1 beta OS=Homo sapiens OX=9606 GN=BUB1B PE=1 SV=3	C(ITC[C])LQIPEK|C(ITC[C])LQIPEK||C(ITC[C])LQIPEK||||	3|3||1||||	0.97|1.08||1.1||||	0.08145|0.09849||NA||||	1.05	0.07	7
Q9Y2R4_536	DDX52	DDX52_HUMAN Probable ATP-dependent RNA helicase DDX52 OS=Homo sapiens OX=9606 GN=DDX52 PE=1 SV=3	C(ITC[C])PVPEYIK|||C(ITC[C])PVPEYIK|C(ITC[C])PVPEYIK|||	1|||1|2|||	0.97|||1.38|0.795|||	NA|||NA|0.38891|||	1.04833	0.30026	4
Q9UKD2_33	MRTO4	MRT4_HUMAN mRNA turnover protein 4 homolog OS=Homo sapiens OX=9606 GN=MRTO4 PE=1 SV=2	C(ITC[C])VDTYK|C(ITC[C])VDTYK|C(ITC[C])VDTYK|C(ITC[C])VDTYK||||	1|1|1|1||||	1.35|1.28|0.81|0.75||||	NA|NA|NA|NA||||	1.0475	0.31117	4
P63167_24	DYNLL1	DYL1_HUMAN Dynein light chain 1, cytoplasmic OS=Homo sapiens OX=9606 GN=DYNLL1 PE=1 SV=1	C(ITC[C])ATQALEK|C(ITC[C])ATQALEK|C(ITC[C])ATQALEK|C(ITC[C])ATQALEK|C(ITC[C])ATQALEK|C(ITC[C])ATQALEK||C(ITC[C])ATQALEK	1|1|2|1|1|1||2	1.08|1.06|1.015|0.65|1.35|1.44||0.705	NA|NA|0.14849|NA|NA|NA||0.03536	1.04286	0.29524	9
O00139_406	KIF2A	KIF2A_HUMAN Kinesin-like protein KIF2A OS=Homo sapiens OX=9606 GN=KIF2A PE=1 SV=3	C(ITC[C])VEDVLK|C(ITC[C])VEDVLK|C(ITC[C])VEDVLK|C(ITC[C])VEDVLK||||	1|3|1|2||||	1.47|0.72|0.99|0.99||||	NA|0.37242|NA|0.08485||||	1.0425	0.31213	7
Q96SN8_528	CDK5RAP2	CK5P2_HUMAN CDK5 regulatory subunit-associated protein 2 OS=Homo sapiens OX=9606 GN=CDK5RAP2 PE=1 SV=5	C(ITC[C])SSQQPPGSK|C(ITC[C])SSQQPPGSK|C(ITC[C])SSQQPPGSK|||||	1|3|1|||||	1.15|1.25|0.72|||||	NA|0.08083|NA|||||	1.04	0.2816	5
Q9UQ35_872	SRRM2	SRRM2_HUMAN Serine/arginine repetitive matrix protein 2 OS=Homo sapiens OX=9606 GN=SRRM2 PE=1 SV=2	C(ITC[C])FESSPDPELK|||C(ITC[C])FESSPDPELK|C(ITC[C])FESSPDPELK|C(ITC[C])FESSPDPELK|C(ITC[C])FESSPDPELK|C(ITC[C])FESSPDPELK	2|||2|4|2|3|4	1.11|||0.88|1.22|1.21|0.87|0.95	0.0|||0.19799|0.22157|0.08485|0.0|0.06928	1.04	0.1605	17
O75044_357	SRGAP2	SRGP2_HUMAN SLIT-ROBO Rho GTPase-activating protein 2 OS=Homo sapiens OX=9606 GN=SRGAP2 PE=1 SV=3	|C(ITC[C])AQQPVQSELVQR|||C(ITC[C])AQQPVQSELVQR|C(ITC[C])AQQPVQSELVQR||	|1|||3|2||	|1.07|||0.99|1.055||	|NA|||0.08505|0.00707||	1.03833	0.04252	6
P15880_188	RPS2	RS2_HUMAN 40S ribosomal protein S2 OS=Homo sapiens OX=9606 GN=RPS2 PE=1 SV=2	C(ITC[C])GSVLVR|C(ITC[C])GSVLVR|C(ITC[C])GSVLVR|C(ITC[C])GSVLVR|C(ITC[C])GSVLVR|C(ITC[C])GSVLVR|C(ITC[C])GSVLVR|C(ITC[C])GSVLVR	4|7|2|1|3|1|2|2	1.31|1.28|0.75|0.75|1.32|1.32|0.915|0.66	0.04123|0.07789|0.05657|NA|0.0|NA|0.26163|0.0	1.03812	0.29653	22
P55209_88	NAP1L1	NP1L1_HUMAN Nucleosome assembly protein 1-like 1 OS=Homo sapiens OX=9606 GN=NAP1L1 PE=1 SV=1	C(ITC[C])AQIEAK|C(ITC[C])AQIEAK||C(ITC[C])AQIEAK|C(ITC[C])AQIEAK||C(ITC[C])AQIEAK|	5|5||2|1||1|	1.32|1.36||0.79|0.99||0.73|	0.2555|0.02387||0.01414|NA||NA|	1.038	0.29235	14
P78527_4061	PRKDC	PRKDC_HUMAN DNA-dependent protein kinase catalytic subunit OS=Homo sapiens OX=9606 GN=PRKDC PE=1 SV=3	C(ITC[C])DELLLGHEK||||C(ITC[C])DELLLGHEK|C(ITC[C])DELLLGHEK|C(ITC[C])DELLLGHEK|	1||||2|1|2|	1.16||||0.94|1.02|1.03|	NA||||0.04243|NA|0.0|	1.0375	0.09106	6
Q9NSE4_1005	IARS2	SYIM_HUMAN Isoleucine--tRNA ligase, mitochondrial OS=Homo sapiens OX=9606 GN=IARS2 PE=1 SV=2	C(ITC[C])AEVVSGK|C(ITC[C])AEVVSGK||C(ITC[C])AEVVSGK|C(ITC[C])AEVVSGK|||	1|2||1|1|||	1.21|1.28||0.84|0.81|||	NA|0.12728||NA|NA|||	1.035	0.24447	5
O00410_110	IPO5	IPO5_HUMAN Importin-5 OS=Homo sapiens OX=9606 GN=IPO5 PE=1 SV=4	||C(ITC[C])DIAAELAR|C(ITC[C])DIAAELAR|||C(ITC[C])DIAAELAR|C(ITC[C])DIAAELAR	||2|1|||1|1	||0.85|1.01|||0.96|1.32	||0.11314|NA|||NA|NA	1.035	0.20141	5
P08865_148	RPSA	RSSA_HUMAN 40S ribosomal protein SA OS=Homo sapiens OX=9606 GN=RPSA PE=1 SV=4	C(ITC[C])NTDSPLR|C(ITC[C])NTDSPLR|C(ITC[C])NTDSPLR|C(ITC[C])NTDSPLR|C(ITC[C])NTDSPLR|C(ITC[C])NTDSPLR|C(ITC[C])NTDSPLR|	3|2|1|1|2|1|2|	0.98|0.935|0.59|0.77|1.48|1.51|0.97|	0.08888|0.00707|NA|NA|0.28284|NA|0.15556|	1.03357	0.34379	12
Q86UP2_1105	KTN1	KTN1_HUMAN Kinectin OS=Homo sapiens OX=9606 GN=KTN1 PE=1 SV=1	C(ITC[C])MAGTSGSEEVK|C(ITC[C])MAGTSGSEEVK||C(ITC[C])MAGTSGSEEVK||||	1|1||1||||	1.01|1.32||0.77||||	NA|NA||NA||||	1.03333	0.27574	3
Q969X6_21	UTP4	UTP4_HUMAN U3 small nucleolar RNA-associated protein 4 homolog OS=Homo sapiens OX=9606 GN=UTP4 PE=1 SV=1	C(ITC[C])VAYNNQSNR|C(ITC[C])VAYNNQSNR|C(ITC[C])VAYNNQSNR|||||	2|1|1|||||	1.25|1.07|0.77|||||	0.15556|NA|NA|||||	1.03	0.24249	4
Q13136_738	PPFIA1	LIPA1_HUMAN Liprin-alpha-1 OS=Homo sapiens OX=9606 GN=PPFIA1 PE=1 SV=1	C(ITC[C])ETSPPSSPR|C(ITC[C])ETSPPSSPR|C(ITC[C])ETSPPSSPR|C(ITC[C])ETSPPSSPR||||	2|1|1|1||||	0.86|1.17|1.17|0.92||||	0.19799|NA|NA|NA||||	1.03	0.1635	5
P31943_267	HNRNPH1	HNRH1_HUMAN Heterogeneous nuclear ribonucleoprotein H OS=Homo sapiens OX=9606 GN=HNRNPH1 PE=1 SV=4	||C(ITC[C])FSGMSDHR||C(ITC[C])FSGMSDHR|C(ITC[C])FSGMSDHR|C(ITC[C])FSGMSDHR|C(ITC[C])FSGMSDHR	||2||9|8|6|2	||0.805||1.34|1.36|0.81|0.82	||0.17678||0.14339|0.96175|0.08367|0.32527	1.027	0.29499	27
A5YKK6_1932	CNOT1	CNOT1_HUMAN CCR4-NOT transcription complex subunit 1 OS=Homo sapiens OX=9606 GN=CNOT1 PE=1 SV=2	|C(ITC[C])YHNLDAFVR|||C(ITC[C])YHNLDAFVR|C(ITC[C])YHNLDAFVR||	|1|||3|2||	|1.0|||0.94|1.14||	|NA|||0.00577|0.0||	1.02667	0.10263	6
Q00610_1102	CLTC	CLH1_HUMAN Clathrin heavy chain 1 OS=Homo sapiens OX=9606 GN=CLTC PE=1 SV=5	C(ITC[C])NEPAVWSQLAK|C(ITC[C])NEPAVWSQLAK|C(ITC[C])NEPAVWSQLAK|C(ITC[C])NEPAVWSQLAK|||C(ITC[C])NEPAVWSQLAK|	5|4|3|6|||1|	1.23|1.3|0.71|0.805|||1.08|	0.05788|0.025|0.05292|0.01643|||NA|	1.025	0.25899	19
Q9UIA9_47	XPO7	XPO7_HUMAN Exportin-7 OS=Homo sapiens OX=9606 GN=XPO7 PE=1 SV=3	C(ITC[C])QLLLER|||C(ITC[C])QLLLER||C(ITC[C])QLLLER||	1|||2||1||	0.95|||0.885||1.24||	NA|||0.10607||NA||	1.025	0.18901	4
Q86VP6_356	CAND1	CAND1_HUMAN Cullin-associated NEDD8-dissociated protein 1 OS=Homo sapiens OX=9606 GN=CAND1 PE=1 SV=2	C(ITC[C])LDAVVSTR|C(ITC[C])LDAVVSTR|C(ITC[C])LDAVVSTR||||C(ITC[C])LDAVVSTR|	3|2|2||||2|	1.04|1.43|0.86||||0.765|	0.00577|0.45255|0.0||||0.17678|	1.02375	0.29386	9
Q13639_113	HTR4	5HT4R_HUMAN 5-hydroxytryptamine receptor 4 OS=Homo sapiens OX=9606 GN=HTR4 PE=1 SV=2	C(ITC[C])ISIDR|C(ITC[C])ISIDR|||C(ITC[C])ISIDR|C(ITC[C])ISIDR||	2|1|||1|2||	1.09|0.98|||1.0|1.02||	0.11314|NA|||NA|0.0||	1.0225	0.04787	6
P17812_491	CTPS1	PYRG1_HUMAN CTP synthase 1 OS=Homo sapiens OX=9606 GN=CTPS1 PE=1 SV=2	C(ITC[C])LEEQGLK|C(ITC[C])LEEQGLK|C(ITC[C])LEEQGLK|C(ITC[C])LEEQGLK|C(ITC[C])LEEQGLK|C(ITC[C])LEEQGLK|C(ITC[C])LEEQGLK|C(ITC[C])LEEQGLK	5|6|1|1|2|6|1|2	1.08|1.105|0.62|0.66|1.35|1.32|0.97|1.07	0.05148|0.03882|NA|NA|0.0|0.05193|NA|0.05657	1.02188	0.26841	24
Q9H0G5_232	NSRP1	NSRP1_HUMAN Nuclear speckle splicing regulatory protein 1 OS=Homo sapiens OX=9606 GN=NSRP1 PE=1 SV=1	C(ITC[C])ILQTDVK|C(ITC[C])ILQTDVK|C(ITC[C])ILQTDVK|C(ITC[C])ILQTDVK||||	1|1|1|2||||	1.06|1.08|1.11|0.835||||	NA|NA|NA|0.02121||||	1.02125	0.12586	5
P16885_624	PLCG2	PLCG2_HUMAN 1-phosphatidylinositol 4,5-bisphosphate phosphodiesterase gamma-2 OS=Homo sapiens OX=9606 GN=PLCG2 PE=1 SV=4	C(ITC[C])AEFELR|C(ITC[C])AEFELR|||C(ITC[C])AEFELR|C(ITC[C])AEFELR||	1|1|||2|1||	0.95|0.99|||0.985|1.16||	NA|NA|||0.06364|NA||	1.02125	0.0942	5
Q12923_2024	PTPN13	PTN13_HUMAN Tyrosine-protein phosphatase non-receptor type 13 OS=Homo sapiens OX=9606 GN=PTPN13 PE=1 SV=2	C(ITC[C])STYQIK|C(ITC[C])STYQIK|||C(ITC[C])STYQIK|||	2|2|||1|||	1.12|0.98|||0.96|||	0.38184|0.07071|||NA|||	1.02	0.08718	5
P26639_254	TARS1	SYTC_HUMAN Threonine--tRNA ligase 1, cytoplasmic OS=Homo sapiens OX=9606 GN=TARS1 PE=1 SV=3	C(ITC[C])GPLIDLCR|C(ITC[C])GPLIDLCR|C(ITC[C])GPLIDLCR|C(ITC[C])GPLIDLCR||||	1|2|1|1||||	1.29|1.245|0.73|0.81||||	NA|0.16263|NA|NA||||	1.01875	0.28967	5
Q9UBQ5_87	EIF3K	EIF3K_HUMAN Eukaryotic translation initiation factor 3 subunit K OS=Homo sapiens OX=9606 GN=EIF3K PE=1 SV=1	C(ITC[C])MIDQAHQEER|C(ITC[C])MIDQAHQEER|C(ITC[C])MIDQAHQEERPIR||C(ITC[C])MIDQAHQEER|C(ITC[C])MIDQAHQEER||	2|1|1||2|1||	0.885|0.88|0.71||1.11|1.5||	0.2192|NA|NA||0.24042|NA||	1.017	0.30511	7
Q8TDN6_115	BRIX1	BRX1_HUMAN Ribosome biogenesis protein BRX1 homolog OS=Homo sapiens OX=9606 GN=BRIX1 PE=1 SV=2	C(ITC[C])IYFEAK|C(ITC[C])IYFEAK|||C(ITC[C])IYFEAK|||	7|5|||1|||	1.09|1.11|||0.85|||	0.1561|0.05941|||NA|||	1.01667	0.14468	13
P62829_28	RPL23	RL23_HUMAN 60S ribosomal protein L23 OS=Homo sapiens OX=9606 GN=RPL23 PE=1 SV=1	|C(ITC[C])ADNTGAK|||C(ITC[C])ADNTGAK|C(ITC[C])ADNTGAK||	|1|||1|1||	|0.91|||1.15|0.99||	|NA|||NA|NA||	1.01667	0.1222	3
Q12906_203	ILF3	ILF3_HUMAN Interleukin enhancer-binding factor 3 OS=Homo sapiens OX=9606 GN=ILF3 PE=1 SV=3	C(ITC[C])LAALASLR|C(ITC[C])LAALASLR|C(ITC[C])LAALASLR|C(ITC[C])LAALASLR||C(ITC[C])LAALASLR||C(ITC[C])LAALASLR	2|2|3|6||1||1	1.16|1.375|0.89|0.76||1.2||0.71	0.05657|0.23335|0.1097|0.05776||NA||NA	1.01583	0.26778	15
Q13618_464	CUL3	CUL3_HUMAN Cullin-3 OS=Homo sapiens OX=9606 GN=CUL3 PE=1 SV=2	C(ITC[C])QFTSK|TECGC(ITC[C])QFTSK|||C(ITC[C])QFTSK|||	1|1|||1|||	1.2|0.7|||1.14|||	NA|NA|||NA|||	1.01333	0.27301	3
Q6NUM9_106	RETSAT	RETST_HUMAN All-trans-retinol 13,14-reductase OS=Homo sapiens OX=9606 GN=RETSAT PE=1 SV=2	C(ITC[C])HTFGK||||C(ITC[C])HTFGK|C(ITC[C])HTFGK||	1||||1|1||	0.83||||1.02|1.19||	NA||||NA|NA||	1.01333	0.18009	3
Q92747_279	ARPC1A	ARC1A_HUMAN Actin-related protein 2/3 complex subunit 1A OS=Homo sapiens OX=9606 GN=ARPC1A PE=1 SV=2	|C(ITC[C])LTFVSK||||C(ITC[C])LTFVSK|C(ITC[C])LTFVSK|C(ITC[C])LTFVSK	|3||||2|1|1	|0.67||||1.0|1.27|1.11	|0.51391||||0.0|NA|NA	1.0125	0.25382	7
Q9BYC9_93	MRPL20	RM20_HUMAN 39S ribosomal protein L20, mitochondrial OS=Homo sapiens OX=9606 GN=MRPL20 PE=1 SV=1	C(ITC[C])QVELNR|C(ITC[C])QVELNR|C(ITC[C])QVELNR|C(ITC[C])QVELNR|C(ITC[C])QVELNR|C(ITC[C])QVELNR||	3|2|1|1|1|1||	1.08|1.13|0.78|0.94|1.2|0.94||	0.02309|0.0|NA|NA|NA|NA||	1.01167	0.15368	9
P35270_159	SPR	SPRE_HUMAN Sepiapterin reductase OS=Homo sapiens OX=9606 GN=SPR PE=1 SV=1	C(ITC[C])ALQPFK||||C(ITC[C])ALQPFK|C(ITC[C])ALQPFK||	1||||1|3||	0.97||||0.71|1.35||	NA||||NA|0.34641||	1.01	0.32187	5
P78406_217	RAE1	RAE1L_HUMAN mRNA export factor OS=Homo sapiens OX=9606 GN=RAE1 PE=1 SV=1	C(ITC[C])VAIFK|C(ITC[C])VAIFK|C(ITC[C])VAIFK|C(ITC[C])VAIFK||||	9|4|1|2||||	1.23|1.13|0.83|0.85||||	0.22771|0.0263|NA|0.04243||||	1.01	0.20067	16
P62333_170	PSMC6	PRS10_HUMAN 26S proteasome regulatory subunit 10B OS=Homo sapiens OX=9606 GN=PSMC6 PE=1 SV=1	C(ITC[C])LLYGPPGTGK|C(ITC[C])LLYGPPGTGK||GC(ITC[C])LLYGPPGTGK|C(ITC[C])LLYGPPGTGK|C(ITC[C])LLYGPPGTGK|GC(ITC[C])LLYGPPGTGK C(ITC[C])LLYGPPGTGK|GC(ITC[C])LLYGPPGTGK C(ITC[C])LLYGPPGTGK	6|5||1|4|5|3|3	1.13|1.11||0.88|1.28|1.2|0.72|0.73	0.11462|0.4121||NA|0.12553|0.08031|0.18583|0.06807	1.00714	0.22831	27
P62244_72	RPS15A	RS15A_HUMAN 40S ribosomal protein S15a OS=Homo sapiens OX=9606 GN=RPS15A PE=1 SV=2	C(ITC[C])GVISPR|C(ITC[C])GVISPR|C(ITC[C])GVISPR|C(ITC[C])GVISPR|C(ITC[C])GVISPR|C(ITC[C])GVISPR|C(ITC[C])GVISPR|C(ITC[C])GVISPR	13|9|8|11|10|8|6|6	1.16|1.17|0.62|0.61|1.38|1.345|0.91|0.86	0.10902|0.0728|0.0255|0.05405|0.03266|0.03603|0.02658|0.02944	1.00687	0.30278	71
[truncated: 1,000 more rows]

## Sheet: 3
Ac_Site	Genename	Description	Modified sequences	Spectrum count	All ratio	All SD Ratio	Ratio average	Ratio SD	Total spectrum count	Repeat counts
[truncated: 901 more rows]

[truncated: 55 more sheets: 4, 5, 6, 7, 8, 9, 10, 11, 12, 13, 14, 15, 16, 17, 18, 19, 20, 21, 22, 23 …]
