# Supplementary material for: Proteolysis-assisted cyclization facilitates site-centric target deconvolution of isothiocyanates
Source: Research Square preprint supplement (doi:10.21203/rs.3.rs-5055115/v1), 2025-10-08
Supplement: Supplementary file 8 [file e7a10a66d482412011011ee1.xlsx]

## Sheet: Legend
Supplementary Data 2. Trypsin-based PAC for mapping in situ ITCyne-adducted sites in the HEK293T proteome. HEK293T cells treated with 500 μM ITCyne were harvested, lysed and processed into tryptic peptide. The resulting probe-labeled peptides were conjugated with Az-UV-biotin via CuAAC. The biotinylated peptides were captured with streptavidin and photoreleased for LC-MS/MS-based proteomics.

## Sheet: Data S2
Uniprot Accession #	Site #	Genename	Genename_Site#	Description	AA in P(-1)	Modified Sequences			Spectrum Count			Median identification score			# of duplicate
						BP1	BP2	BP3	BP1	BP2	BP3	BP1	BP2	BP3
P49773	84	HINT1	HINT1_C84	HINT1_HUMAN Histidine triad nucleotide-binding protein 1 OS=Homo sapiens OX=9606 GN=HINT1 PE=1 SV=2	K	C#AADLGLNK	C#AADLGLNK	C#AADLGLNK	1	1	1	0.0649623	0.00412527	0.0021161	3
P32322	95	PYCR1	PYCR1_C95	P5CR1_HUMAN Pyrroline-5-carboxylate reductase 1, mitochondrial OS=Homo sapiens OX=9606 GN=PYCR1 PE=1 SV=2	S	C#AAGVTISSIEK	C#AAGVTISSIEK	C#AAGVTISSIEK	1	1	1	0.00502001	0.00762764	0.175588	3
Q96C36	95	PYCR2	PYCR2_C95	P5CR2_HUMAN Pyrroline-5-carboxylate reductase 2 OS=Homo sapiens OX=9606 GN=PYCR2 PE=1 SV=1	S	C#AAGVTISSVEK	C#AAGVTISSVEK	C#AAGVTISSVEK	1	1	1	0.0954522	0.377513	0.0226895	3
Q5H9R7	844	PPP6R3	PPP6R3_C844	PP6R3_HUMAN Serine/threonine-protein phosphatase 6 regulatory subunit 3 OS=Homo sapiens OX=9606 GN=PPP6R3 PE=1 SV=2	K	C#AAPRPPSSSPEQR	C#AAPRPPSSSPEQR	C#AAPRPPSSSPEQR	4	2	3	0.112495	0.124723	0.0127075	3
O75152	636	ZC3H11A	ZC3H11A_C636	ZC11A_HUMAN Zinc finger CCCH domain-containing protein 11A OS=Homo sapiens OX=9606 GN=ZC3H11A PE=1 SV=3	K	C#AAQTLEK	C#AAQTLEK	C#AAQTLEK	1	2	2	0.0926811	0.170182	0.131974	3
Q15020	670	SART3	SART3_C670	SART3_HUMAN Squamous cell carcinoma antigen recognized by T-cells 3 OS=Homo sapiens OX=9606 GN=SART3 PE=1 SV=1	K	C#AAVDVEPPSK	C#AAVDVEPPSK	C#AAVDVEPPSK	4	3	4	0.0624241	0.0178295	0.0219896	3
P42772	74	CDKN2B	CDKN2B_C74	CDN2B_HUMAN Cyclin-dependent kinase 4 inhibitor B OS=Homo sapiens OX=9606 GN=CDKN2B PE=1 SV=1	N	C#ADPATLTR	C#ADPATLTR	C#ADPATLTR	1	2	2	0.176553	0.127281	0.150781	3
O95801	110	TTC4	TTC4_C110	TTC4_HUMAN Tetratricopeptide repeat protein 4 OS=Homo sapiens OX=9606 GN=TTC4 PE=1 SV=3	K	C#ADPDLNAVLYTNR	C#ADPDLNAVLYTNR	C#ADPDLNAVLYTNR	1	1	3	0.00556787	0.00286748	0.013956	3
Q14696	180	MESD	MESD_C180	MESD_HUMAN LRP chaperone MESD OS=Homo sapiens OX=9606 GN=MESD PE=1 SV=2	R	C#ADVTLEGQVYPGK	C#ADVTLEGQVYPGK	C#ADVTLEGQVYPGK	1	1	1	0.0056814	0.0083007	0.227435	3
P62910	96	RPL32	RPL32_C96	RL32_HUMAN 60S ribosomal protein L32 OS=Homo sapiens OX=9606 GN=RPL32 PE=1 SV=2	Y	C#AEIAHNVSSK	C#AEIAHNVSSK	C#AEIAHNVSSK	1	1	2	0.305217	0.0227668	0.00912058	3
Q96G46	377	DUS3L	DUS3L_C377	DUS3L_HUMAN tRNA-dihydrouridine(47) synthase [NAD(P)(+)]-like OS=Homo sapiens OX=9606 GN=DUS3L PE=1 SV=2	K	C#AELLSR	C#AELLSR	C#AELLSR	1	1	1	0.114187	0.0571396	0.0556828	3
P49916	729	LIG3	LIG3_C729	DNLI3_HUMAN DNA ligase 3 OS=Homo sapiens OX=9606 GN=LIG3 PE=1 SV=2	K	C#AGGHDDATLAR	C#AGGHDDATLAR	C#AGGHDDATLAR	2	2	2	0.00426901	0.0833062	0.0211414	3
P50579	290	METAP2	METAP2_C290	MAP2_HUMAN Methionine aminopeptidase 2 OS=Homo sapiens OX=9606 GN=METAP2 PE=1 SV=1	K	C#AGIDVR	C#AGIDVR	C#AGIDVR	1	2	2	0.360926	0.293356	0.178317	3
P12004	81	PCNA	PCNA_C81	PCNA_HUMAN Proliferating cell nuclear antigen OS=Homo sapiens OX=9606 GN=PCNA PE=1 SV=1	K	C#AGNEDIITLR	C#AGNEDIITLR	C#AGNEDIITLR	4	3	4	0.0273317	0.00198088	0.00316196	3
Q15050	52	RRS1	RRS1_C52	RRS1_HUMAN Ribosome biogenesis regulatory protein homolog OS=Homo sapiens OX=9606 GN=RRS1 PE=1 SV=2	R	C#AGPTPEAELQALAR	C#AGPTPEAELQALAR	C#AGPTPEAELQALAR	3	3	3	0.00360828	0.00417865	8.73e-05	3
Q99733	77	NAP1L4	NAP1L4_C77	NP1L4_HUMAN Nucleosome assembly protein 1-like 4 OS=Homo sapiens OX=9606 GN=NAP1L4 PE=1 SV=1	R	C#AHIEAK	C#AHIEAK	C#AHIEAK	1	2	2	0.0300801	0.050979	0.0389031	3
Q9Y4I1	535	MYO5A	MYO5A_C535	MYO5A_HUMAN Unconventional myosin-Va OS=Homo sapiens OX=9606 GN=MYO5A PE=1 SV=2	K	C#ALFEKPR	C#ALFEKPR	C#ALFEKPR	1	2	2	0.356849	0.353768	0.265393	3
Q12789	1091	GTF3C1	GTF3C1_C1091	TF3C1_HUMAN General transcription factor 3C polypeptide 1 OS=Homo sapiens OX=9606 GN=GTF3C1 PE=1 SV=4	K	C#AMLEYTTGSR	C#AMLEYTTGSR	C#AMLEYTTGSR	1	2	1	0.0193459	0.169884	0.0382379	3
Q99832	158	CCT7	CCT7_C158	TCPH_HUMAN T-complex protein 1 subunit eta OS=Homo sapiens OX=9606 GN=CCT7 PE=1 SV=2	K	C#AMTALSSK	C#AMTALSSK	C#AMTALSSK	4	5	7	0.00350324	0.00468786	0.00471078	3
O00116	413	AGPS	AGPS_C413	ADAS_HUMAN Alkyldihydroxyacetonephosphate synthase, peroxisomal OS=Homo sapiens OX=9606 GN=AGPS PE=1 SV=1	R	C#APASIR	C#APASIR	C#APASIR	1	2	2	0.120861	0.135828	0.124835	3
Q13371	35	PDCL	PDCL_C35	PHLP_HUMAN Phosducin-like protein OS=Homo sapiens OX=9606 GN=PDCL PE=1 SV=3	R	C#APASSSVPAEAELAGEGISVNTGPK	C#APASSSVPAEAELAGEGISVNTGPK	C#APASSSVPAEAELAGEGISVNTGPK	1	1	1	0.0437892	0.000163251	1.98e-05	3
P46013	958	MKI67	MKI67_C958	KI67_HUMAN Proliferation marker protein Ki-67 OS=Homo sapiens OX=9606 GN=MKI67 PE=1 SV=2	K	C#APMSDLTDLK	C#APMSDLTDLK	C#APMSDLTDLK	3	2	2	0.0285307	0.178713	0.0281343	3
P21333	2543	FLNA	FLNA_C2543	FLNA_HUMAN Filamin-A OS=Homo sapiens OX=9606 GN=FLNA PE=1 SV=4	T	C#APQHGAPGPGPADASK	C#APQHGAPGPGPADASK	C#APQHGAPGPGPADASK	2	3	2	0.078071	0.135366	0.00156826	3
Q8N163	387	CCAR2	CCAR2_C387	CCAR2_HUMAN Cell cycle and apoptosis regulator protein 2 OS=Homo sapiens OX=9606 GN=CCAR2 PE=1 SV=2	R	C#AQAQTGIDLSGCTK	C#AQAQTGIDLSGCTK	C#AQAQTGIDLSGCTK	1	1	1	0.00789805	0.00584388	0.00454297	3
P55209	88	NAP1L1	NAP1L1_C88	NP1L1_HUMAN Nucleosome assembly protein 1-like 1 OS=Homo sapiens OX=9606 GN=NAP1L1 PE=1 SV=1	K	C#AQIEAK	C#AQIEAK	C#AQIEAK	2	2	2	0.0709985	0.0809144	0.134654	3
P18031	121	PTPN1	PTPN1_C121	PTN1_HUMAN Tyrosine-protein phosphatase non-receptor type 1 OS=Homo sapiens OX=9606 GN=PTPN1 PE=1 SV=1	K	C#AQYWPQK	C#AQYWPQK	C#AQYWPQK	3	2	2	0.216517	0.174901	0.0677938	3
Q99439	215	CNN2	CNN2_C215	CNN2_HUMAN Calponin-2 OS=Homo sapiens OX=9606 GN=CNN2 PE=1 SV=4	K	C#ASQVGMTAPGTR	C#ASQVGMTAPGTR	C#ASQVGMTAPGTR	3	3	1	0.0646792	0.0116354	0.0148073	3
O95861	42	BPNT1	BPNT1_C42	BPNT1_HUMAN 3'(2'),5'-bisphosphate nucleotidase 1 OS=Homo sapiens OX=9606 GN=BPNT1 PE=1 SV=1	T	C#ATDLQTK	C#ATDLQTK	C#ATDLQTK	1	1	1	0.322037	0.289901	0.280693	3
O75874	73	IDH1	IDH1_C73	IDHC_HUMAN Isocitrate dehydrogenase [NADP] cytoplasmic OS=Homo sapiens OX=9606 GN=IDH1 PE=1 SV=2	K	C#ATITPDEK	C#ATITPDEK	C#ATITPDEK C#ATITPDEKR	2	2	4	0.1251	0.194421	0.352112	3
P63167	24	DYNLL1	DYNLL1_C24	DYL1_HUMAN Dynein light chain 1, cytoplasmic OS=Homo sapiens OX=9606 GN=DYNLL1 PE=1 SV=1	E	C#ATQALEK	C#ATQALEK	C#ATQALEK	1	1	1	0.244133	0.0947071	0.111092	3
Q8WTW3	72	COG1	COG1_C72	COG1_HUMAN Conserved oligomeric Golgi complex subunit 1 OS=Homo sapiens OX=9606 GN=COG1 PE=1 SV=1	R	C#AVGLVDAVK	C#AVGLVDAVK	C#AVGLVDAVK	1	1	1	0.0316257	0.0265628	0.0313336	3
Q9Y490	575	TLN1	TLN1_C575	TLN1_HUMAN Talin-1 OS=Homo sapiens OX=9606 GN=TLN1 PE=1 SV=3	G	C#AVTTISSNLTEMSR	C#AVTTISSNLTEMSR	C#AVTTISSNLTEMSR	2	3	1	0.0902686	0.0255681	0.0219834	3
Q70EK9	680	USP51	USP51_C680	UBP51_HUMAN Ubiquitin carboxyl-terminal hydrolase 51 OS=Homo sapiens OX=9606 GN=USP51 PE=1 SV=1	S	C#DDAIITK	C#DDAIITK	C#DDAIITK	2	1	1	0.163897	0.284998	0.139543	3
Q9Y4X5	327	ARIH1	ARIH1_C327	ARI1_HUMAN E3 ubiquitin-protein ligase ARIH1 OS=Homo sapiens OX=9606 GN=ARIH1 PE=1 SV=2	K	C#DDDSETSNWIAANTK	C#DDDSETSNWIAANTK	C#DDDSETSNWIAANTK	1	1	1	0.0326723	0.00671196	0.0112387	3
P17844	354	DDX5	DDX5_C354	DDX5_HUMAN Probable ATP-dependent RNA helicase DDX5 OS=Homo sapiens OX=9606 GN=DDX5 PE=1 SV=1	R	C#DELTR	C#DELTR	C#DELTR	2	1	1	0.182231	0.178605	0.134225	3
O14802	724	POLR3A	POLR3A_C724	RPC1_HUMAN DNA-directed RNA polymerase III subunit RPC1 OS=Homo sapiens OX=9606 GN=POLR3A PE=1 SV=2	K	C#DEYIEALNTGK	C#DEYIEALNTGK	C#DEYIEALNTGK	1	1	1	0.0523417	0.0691198	0.0390868	3
P60660	2	MYL6	MYL6_C2	MYL6_HUMAN Myosin light polypeptide 6 OS=Homo sapiens OX=9606 GN=MYL6 PE=1 SV=2	M	C#DFTEDQTAEFK	C#DFTEDQTAEFK	C#DFTEDQTAEFK	2	1	1	0.0100759	0.0569224	0.023387	3
P62258	98	YWHAE	YWHAE_C98	1433E_HUMAN 14-3-3 protein epsilon OS=Homo sapiens OX=9606 GN=YWHAE PE=1 SV=1	C	C#DILDVLDK	C#DILDVLDK	C#DILDVLDK	1	1	1	0.0576232	0.0301116	0.052845	3
Q9ULV4	420	CORO1C	CORO1C_C420	COR1C_HUMAN Coronin-1C OS=Homo sapiens OX=9606 GN=CORO1C PE=1 SV=1	K	C#DLISIPK	C#DLISIPK	C#DLISIPK	1	1	1	0.0807367	0.151852	0.0478884	3
Q9BY44	306	EIF2A	EIF2A_C306	EIF2A_HUMAN Eukaryotic translation initiation factor 2A OS=Homo sapiens OX=9606 GN=EIF2A PE=1 SV=3	K	C#DPVFDFGTGPR	C#DPVFDFGTGPR	C#DPVFDFGTGPR	1	1	2	0.13912	0.0276661	0.0619434	3
Q9UPN9	447	TRIM33	TRIM33_C447	TRI33_HUMAN E3 ubiquitin-protein ligase TRIM33 OS=Homo sapiens OX=9606 GN=TRIM33 PE=1 SV=3	R	C#DPVPAANGAIR	C#DPVPAANGAIR	C#DPVPAANGAIR	1	1	2	0.00784238	0.024207	0.185721	3
P42858	942	HTT	HTT_C942	HD_HUMAN Huntingtin OS=Homo sapiens OX=9606 GN=HTT PE=1 SV=2	K	C#DQGQADPVVAVAR	C#DQGQADPVVAVAR	C#DQGQADPVVAVAR	2	1	1	0.0808511	0.198447	0.0627272	3
P22413	807	ENPP1	ENPP1_C807	ENPP1_HUMAN Ectonucleotide pyrophosphatase/phosphodiesterase family member 1 OS=Homo sapiens OX=9606 GN=ENPP1 PE=1 SV=2	R	C#DSLENLR	C#DSLENLR	C#DSLENLR	1	1	1	0.0531849	0.158842	0.055259	3
P27694	503	RPA1	RPA1_C503	RFA1_HUMAN Replication protein A 70 kDa DNA-binding subunit OS=Homo sapiens OX=9606 GN=RPA1 PE=1 SV=2	K	C#DTEFPNFK	C#DTEFPNFK	C#DTEFPNFK	2	2	3	0.0396466	0.126468	0.0633331	3
O14981	1542	BTAF1	BTAF1_C1542	BTAF1_HUMAN TATA-binding protein-associated factor 172 OS=Homo sapiens OX=9606 GN=BTAF1 PE=1 SV=2	K	C#DVDETVSSATLSEETEKPK	C#DVDETVSSATLSEETEKPK	C#DVDETVSSATLSEETEKPK	1	1	1	0.0074949	0.0224397	7.92e-05	3
P52789	886	HK2	HK2_C886	HXK2_HUMAN Hexokinase-2 OS=Homo sapiens OX=9606 GN=HK2 PE=1 SV=2	K	C#DVSFLQSEDGSGK	C#DVSFLQSEDGSGK	C#DVSFLQSEDGSGK	2	2	2	0.0102184	0.108634	0.0123	3
O43447	131	PPIH	PPIH_C131	PPIH_HUMAN Peptidyl-prolyl cis-trans isomerase H OS=Homo sapiens OX=9606 GN=PPIH PE=1 SV=1	K	C#DWLDGK	C#DWLDGK	C#DWLDGK	2	1	2	0.370719	0.229367	0.212912	3
P52815	45	MRPL12	MRPL12_C45	RM12_HUMAN 39S ribosomal protein L12, mitochondrial OS=Homo sapiens OX=9606 GN=MRPL12 PE=1 SV=2	R	C#EALAGAPLDNAPK	C#EALAGAPLDNAPK	C#EALAGAPLDNAPK	2	1	3	0.00378551	0.00279476	0.000836	3
Q8IWC1	572	MAP7D3	MAP7D3_C572	MA7D3_HUMAN MAP7 domain-containing protein 3 OS=Homo sapiens OX=9606 GN=MAP7D3 PE=1 SV=2	R	C#EALSQR	C#EALSQR	C#EALSQR	1	1	2	0.1086	0.0752025	0.205789	3
Q9BY67	313	CADM1	CADM1_C313	CADM1_HUMAN Cell adhesion molecule 1 OS=Homo sapiens OX=9606 GN=CADM1 PE=1 SV=2	R	C#EASNIVGK	C#EASNIVGK	C#EASNIVGK	1	1	1	0.0541606	0.350621	0.0315202	3
P27708	1296	CAD	CAD_C1296	PYR1_HUMAN CAD protein OS=Homo sapiens OX=9606 GN=CAD PE=1 SV=3	R	C#EAYLK	C#EAYLK	C#EAYLK	1	1	1	0.377091	0.139024	0.170893	3
Q00610	870	CLTC	CLTC_C870	CLH1_HUMAN Clathrin heavy chain 1 OS=Homo sapiens OX=9606 GN=CLTC PE=1 SV=5	G	C#EEPATHNALAK	C#EEPATHNALAK	C#EEPATHNALAK	1	1	1	0.0890971	0.0194314	0.00172581	3
Q9P0M6	286	H2AFY2	H2AFY2_C286	H2AW_HUMAN Core histone macro-H2A.2 OS=Homo sapiens OX=9606 GN=H2AFY2 PE=1 SV=3	K	C#EEQLEETIK	C#EEQLEETIK	C#EEQLEETIK	1	1	1	0.0838562	0.0939008	0.0147486	3
Q92621	698	NUP205	NUP205_C698	NU205_HUMAN Nuclear pore complex protein Nup205 OS=Homo sapiens OX=9606 GN=NUP205 PE=1 SV=3	R	C#EEYPLTR	C#EEYPLTR	C#EEYPLTR	1	1	1	0.12541	0.0562875	0.0609629	3
Q9P2J5	70	LARS	LARS_C70	SYLC_HUMAN Leucine--tRNA ligase, cytoplasmic OS=Homo sapiens OX=9606 GN=LARS PE=1 SV=2	K	C#EFAVGYQR	C#EFAVGYQR	C#EFAVGYQR	2	2	2	0.137812	0.0176438	0.0163627	3
P10809	237	HSPD1	HSPD1_C237	CH60_HUMAN 60 kDa heat shock protein, mitochondrial OS=Homo sapiens OX=9606 GN=HSPD1 PE=1 SV=2	K	C#EFQDAYVLLSEK	C#EFQDAYVLLSEK	C#EFQDAYVLLSEK	1	1	3	0.00309468	0.0122966	0.00356955	3
P40429	38	RPL13A	RPL13A_C38	RL13A_HUMAN 60S ribosomal protein L13a OS=Homo sapiens OX=9606 GN=RPL13A PE=1 SV=2	R	C#EGINISGNFYR	C#EGINISGNFYR	C#EGINISGNFYR	1	1	2	0.0289882	0.00887696	0.000837033	3
Q92945	379	KHSRP	KHSRP_C379	FUBP2_HUMAN Far upstream element-binding protein 2 OS=Homo sapiens OX=9606 GN=KHSRP PE=1 SV=4	R	C#EHAAR	C#EHAAR	C#EHAAR	2	2	1	0.220557	0.228442	0.154546	3
O15371	375	EIF3D	EIF3D_C375	EIF3D_HUMAN Eukaryotic translation initiation factor 3 subunit D OS=Homo sapiens OX=9606 GN=EIF3D PE=1 SV=1	R	C#EHDGVMTGANGEVSFINIK	C#EHDGVMTGANGEVSFINIK	C#EHDGVMTGANGEVSFINIK	1	1	3	0.0203748	0.117211	0.000328466	3
Q96RN5	588	MED15	MED15_C588	MED15_HUMAN Mediator of RNA polymerase II transcription subunit 15 OS=Homo sapiens OX=9606 GN=MED15 PE=1 SV=2	K	C#EIALEK	C#EIALEK	C#EIALEK	1	1	1	0.0912672	0.238132	0.352993	3
Q15813	371	TBCE	TBCE_C371	TBCE_HUMAN Tubulin-specific chaperone E OS=Homo sapiens OX=9606 GN=TBCE PE=1 SV=1	K	C#EILPEER	C#EILPEER	C#EILPEER	2	1	1	0.179173	0.0703752	0.0370994	3
Q6P158	1349	DHX57	DHX57_C1349	DHX57_HUMAN Putative ATP-dependent RNA helicase DHX57 OS=Homo sapiens OX=9606 GN=DHX57 PE=1 SV=2	R	C#ELDQLLQDK	C#ELDQLLQDK	C#ELDQLLQDK	1	1	1	0.0088958	0.00285561	0.0255263	3
P55010	59	EIF5	EIF5_C59	IF5_HUMAN Eukaryotic translation initiation factor 5 OS=Homo sapiens OX=9606 GN=EIF5 PE=1 SV=2	G	C#ELGAQTQFDVK	C#ELGAQTQFDVK	C#ELGAQTQFDVK	1	1	1	0.286516	0.38677	0.0642396	3
Q9UFG5	87	C19orf25	C19orf25_C87	CS025_HUMAN UPF0449 protein C19orf25 OS=Homo sapiens OX=9606 GN=C19orf25 PE=1 SV=2	R	C#ELLQR	C#ELLQR	C#ELLQR	1	1	1	0.249626	0.375557	0.22166	3
P13639	369	EEF2	EEF2_C369	EF2_HUMAN Elongation factor 2 OS=Homo sapiens OX=9606 GN=EEF2 PE=1 SV=4	R	C#ELLYEGPPDDEAAMGIK	C#ELLYEGPPDDEAAMGIK	C#ELLYEGPPDDEAAMGIK	8	8	15	0.000570526	2.18e-05	6.03e-05	3
P07814	1487	EPRS	EPRS_C1487	SYEP_HUMAN Bifunctional glutamate/proline--tRNA ligase OS=Homo sapiens OX=9606 GN=EPRS PE=1 SV=5	L	C#ELQPGAK	C#ELQPGAK	C#ELQPGAK	1	1	1	0.102586	0.0944057	0.238834	3
Q9H7D7	238	WDR26	WDR26_C238	WDR26_HUMAN WD repeat-containing protein 26 OS=Homo sapiens OX=9606 GN=WDR26 PE=1 SV=3	R	C#ELTPLK	C#ELTPLK	C#ELTPLK	1	2	2	0.0304036	0.0538343	0.102204	3
Q32MZ4	750	LRRFIP1	LRRFIP1_C750	LRRF1_HUMAN Leucine-rich repeat flightless-interacting protein 1 OS=Homo sapiens OX=9606 GN=LRRFIP1 PE=1 SV=2	R	C#EMSEHPSQTVR	C#EMSEHPSQTVR	C#EMSEHPSQTVR	2	1	2	0.173971	0.292842	0.204967	3
P26641	266	EEF1G	EEF1G_C266	EF1G_HUMAN Elongation factor 1-gamma OS=Homo sapiens OX=9606 GN=EEF1G PE=1 SV=3	E	C#EQALAAEPK	C#EQALAAEPK	C#EQALAAEPK	2	1	2	0.0900883	0.0259983	0.0867545	3
P83731	36	RPL24	RPL24_C36	RL24_HUMAN 60S ribosomal protein L24 OS=Homo sapiens OX=9606 GN=RPL24 PE=1 SV=1	K	C#ESAFLSK	C#ESAFLSK	C#ESAFLSK	2	2	2	0.0503018	0.0516673	0.0229083	3
P08670	328	VIM	VIM_C328	VIME_HUMAN Vimentin OS=Homo sapiens OX=9606 GN=VIM PE=1 SV=4	T	C#EVDALK	C#EVDALK	C#EVDALK	2	1	1	0.228336	0.124294	0.243359	3
O95299	253	NDUFA10	NDUFA10_C253	NDUAA_HUMAN NADH dehydrogenase [ubiquinone] 1 alpha subcomplex subunit 10, mitochondrial OS=Homo sapiens OX=9606 GN=NDUFA10 PE=1 SV=1	K	C#EVLQYSAR	C#EVLQYSAR	C#EVLQYSAR	2	1	1	0.0417542	0.0210696	0.00981986	3
Q9H8H0	333	NOL11	NOL11_C333	NOL11_HUMAN Nucleolar protein 11 OS=Homo sapiens OX=9606 GN=NOL11 PE=1 SV=1	K	C#EVSSLAGALGK	C#EVSSLAGALGK	C#EVSSLAGALGK	1	1	1	0.0091307	0.0109406	0.00417732	3
A3KMH1	724	VWA8	VWA8_C724	VWA8_HUMAN von Willebrand factor A domain-containing protein 8 OS=Homo sapiens OX=9606 GN=VWA8 PE=1 SV=2	K	C#EVTSGTLR	C#EVTSGTLR	C#EVTSGTLR	1	1	1	0.358893	0.366145	0.399166	3
P05388	119	RPLP0	RPLP0_C119	RLA0_HUMAN 60S acidic ribosomal protein P0 OS=Homo sapiens OX=9606 GN=RPLP0 PE=1 SV=1	P	C#EVTVPAQNTGLGPEK	C#EVTVPAQNTGLGPEK	C#EVTVPAQNTGLGPEK	1	1	1	0.19537	0.0102239	0.00706712	3
Q15029	674	EFTUD2	EFTUD2_C674	U5S1_HUMAN 116 kDa U5 small nuclear ribonucleoprotein component OS=Homo sapiens OX=9606 GN=EFTUD2 PE=1 SV=1	K	C#FAETPNKK	C#FAETPNKK C#FAETPNK	C#FAETPNKK	2	3	1	0.253235	0.333178	0.052876	3
Q16658	121	FSCN1	FSCN1_C121	FSCN1_HUMAN Fascin OS=Homo sapiens OX=9606 GN=FSCN1 PE=1 SV=3	S	C#FAQTVSPAEK	C#FAQTVSPAEK	C#FAQTVSPAEK	2	1	1	0.0271276	0.00210673	0.0551364	3
P53350	67	PLK1	PLK1_C67	PLK1_HUMAN Serine/threonine-protein kinase PLK1 OS=Homo sapiens OX=9606 GN=PLK1 PE=1 SV=1	K	C#FEISDADTK	C#FEISDADTK	C#FEISDADTK	1	1	1	0.00548532	0.0145792	0.00833411	3
Q12834	472	CDC20	CDC20_C472	CDC20_HUMAN Cell division cycle protein 20 homolog OS=Homo sapiens OX=9606 GN=CDC20 PE=1 SV=2	R	C#FELDPAR	C#FELDPAR	C#FELDPAR	1	2	2	0.341579	0.0942841	0.0413687	3
P78527	3187	PRKDC	PRKDC_C3187	PRKDC_HUMAN DNA-dependent protein kinase catalytic subunit OS=Homo sapiens OX=9606 GN=PRKDC PE=1 SV=3	R	C#FFLSK	C#FFLSK	C#FFLSK	2	2	2	0.308156	0.317117	0.230961	3
Q13155	168	AIMP2	AIMP2_C168	AIMP2_HUMAN Aminoacyl tRNA synthase complex-interacting multifunctional protein 2 OS=Homo sapiens OX=9606 GN=AIMP2 PE=1 SV=2	K	C#FGEQNKK C#FGEQNK	C#FGEQNKK C#FGEQNK	C#FGEQNK C#FGEQNKK	4	4	5	0.130054	0.0787474	0.0724198	3
P10768	11	ESD	ESD_C11	ESTD_HUMAN S-formylglutathione hydrolase OS=Homo sapiens OX=9606 GN=ESD PE=1 SV=2	K	C#FGGLQK	C#FGGLQK	C#FGGLQK	2	2	2	0.0472707	0.0694076	0.0382123	3
P78527	1312	PRKDC	PRKDC_C1312	PRKDC_HUMAN DNA-dependent protein kinase catalytic subunit OS=Homo sapiens OX=9606 GN=PRKDC PE=1 SV=3	K	C#FGTGAAGNR	C#FGTGAAGNR	C#FGTGAAGNR	2	2	2	0.0128221	0.0135142	0.0101205	3
P23919	163	DTYMK	DTYMK_C163	KTHY_HUMAN Thymidylate kinase OS=Homo sapiens OX=9606 GN=DTYMK PE=1 SV=4	R	C#FHQLMK	C#FHQLMK	C#FHQLMK	1	1	2	0.0330071	0.0364807	0.0947348	3
P05388	27	RPLP0	RPLP0_C27	RLA0_HUMAN 60S acidic ribosomal protein P0 OS=Homo sapiens OX=9606 GN=RPLP0 PE=1 SV=1	K	C#FIVGADNVGSK	C#FIVGADNVGSK	C#FIVGADNVGSK	2	2	4	0.01094	0.00139079	0.00282441	3
Q96QK1	640	VPS35	VPS35_C640	VPS35_HUMAN Vacuolar protein sorting-associated protein 35 OS=Homo sapiens OX=9606 GN=VPS35 PE=1 SV=2	K	C#FSEENHEPLR	C#FSEENHEPLR	C#FSEENHEPLR	4	3	2	0.00739706	0.163021	0.0142706	3
O15160	256	POLR1C	POLR1C_C256	RPAC1_HUMAN DNA-directed RNA polymerases I and III subunit RPAC1 OS=Homo sapiens OX=9606 GN=POLR1C PE=1 SV=1	R	C#FSPGVIEVQEVQGK	C#FSPGVIEVQEVQGK	C#FSPGVIEVQEVQGK	2	2	2	0.181465	0.000821858	0.000730498	3
P14866	581	HNRNPL	HNRNPL_C581	HNRPL_HUMAN Heterogeneous nuclear ribonucleoprotein L OS=Homo sapiens OX=9606 GN=HNRNPL PE=1 SV=2	L	C#FSTAQHAS	C#FSTAQHAS	C#FSTAQHAS	1	3	1	0.0941956	0.106861	0.149077	3
P78527	25	PRKDC	PRKDC_C25	PRKDC_HUMAN DNA-dependent protein kinase catalytic subunit OS=Homo sapiens OX=9606 GN=PRKDC PE=1 SV=3	R	C#GAALAGHQLIR	C#GAALAGHQLIR	C#GAALAGHQLIR	2	2	3	0.00651425	0.00363447	0.000294	3
Q9HCU5	128	PREB	PREB_C128	PREB_HUMAN Prolactin regulatory element-binding protein OS=Homo sapiens OX=9606 GN=PREB PE=1 SV=2	K	C#GAETQHEGLELR	C#GAETQHEGLELR	C#GAETQHEGLELR	2	2	2	0.0498316	0.0587404	0.00402338	3
P04080	3	CSTB	CSTB_C3	CYTB_HUMAN Cystatin-B OS=Homo sapiens OX=9606 GN=CSTB PE=1 SV=2	M	C#GAPSATQPATAETQHIADQVR	C#GAPSATQPATAETQHIADQVR	C#GAPSATQPATAETQHIADQVR	1	2	1	0.00981986	0.00120999	3.61e-05	3
Q9BTC0	455	DIDO1	DIDO1_C455	DIDO1_HUMAN Death-inducer obliterator 1 OS=Homo sapiens OX=9606 GN=DIDO1 PE=1 SV=5	K	C#GAQAGIK	C#GAQAGIK	C#GAQAGIK	1	1	1	0.045145	0.109176	0.025228	3
Q8WXF1	216	PSPC1	PSPC1_C216	PSPC1_HUMAN Paraspeckle component 1 OS=Homo sapiens OX=9606 GN=PSPC1 PE=1 SV=1	R	C#GDGAFLLTTTPR	C#GDGAFLLTTTPR	C#GDGAFLLTTTPR	2	1	2	0.0416827	0.000105704	0.0101928	3
Q8N1F7	328	NUP93	NUP93_C328	NUP93_HUMAN Nuclear pore complex protein Nup93 OS=Homo sapiens OX=9606 GN=NUP93 PE=1 SV=2	R	C#GDLLAASQVVNR	C#GDLLAASQVVNR	C#GDLLAASQVVNR	2	2	2	0.017697	0.00282922	0.00415085	3
P51858	12	HDGF	HDGF_C12	HDGF_HUMAN Hepatoma-derived growth factor OS=Homo sapiens OX=9606 GN=HDGF PE=1 SV=1	K	C#GDLVFAK	C#GDLVFAK	C#GDLVFAK	1	2	2	0.158518	0.111196	0.112599	3
Q15181	114	PPA1	PPA1_C114	IPYR_HUMAN Inorganic pyrophosphatase OS=Homo sapiens OX=9606 GN=PPA1 PE=1 SV=2	C	C#GDNDPIDVCEIGSK	C#GDNDPIDVCEIGSK	C#GDNDPIDVCEIGSK	1	1	1	0.0376266	0.0109936	0.0566439	3
Q13616	355	CUL1	CUL1_C355	CUL1_HUMAN Cullin-1 OS=Homo sapiens OX=9606 GN=CUL1 PE=1 SV=2	K	C#GEAALNDPK	C#GEAALNDPK	C#GEAALNDPK	2	1	2	0.0229903	0.0313545	0.0780495	3
P78347	745	GTF2I	GTF2I_C745	GTF2I_HUMAN General transcription factor II-I OS=Homo sapiens OX=9606 GN=GTF2I PE=1 SV=2	K	C#GEALGLK	C#GEALGLK	C#GEALGLK	3	2	2	0.0304868	0.0315181	0.0357329	3
O43175	295	PHGDH	PHGDH_C295	SERA_HUMAN D-3-phosphoglycerate dehydrogenase OS=Homo sapiens OX=9606 GN=PHGDH PE=1 SV=4	R	C#GEEIAVQFVDMVK	C#GEEIAVQFVDMVK	C#GEEIAVQFVDMVK	3	5	6	0.000242904	0.000238184	0.000228	3
P26640	682	VARS	VARS_C682	SYVC_HUMAN Valine--tRNA ligase OS=Homo sapiens OX=9606 GN=VARS PE=1 SV=4	R	C#GEMAQAASAAVTR	C#GEMAQAASAAVTR	C#GEMAQAASAAVTR	3	8	7	0.000179205	0.00204159	0.000667109	3
P18754	198	RCC1	RCC1_C198	RCC1_HUMAN Regulator of chromosome condensation OS=Homo sapiens OX=9606 GN=RCC1 PE=1 SV=1	G	C#GEQGQLGR	C#GEQGQLGR	C#GEQGQLGR	1	1	1	0.025864	0.0200695	0.042435	3
P62633	57	CNBP	CNBP_C57	CNBP_HUMAN Cellular nucleic acid-binding protein OS=Homo sapiens OX=9606 GN=CNBP PE=1 SV=1	R	C#GESGHLAK	C#GESGHLAK	C#GESGHLAK	2	2	3	0.0187472	0.123096	0.0147242	3
P62633	161	CNBP	CNBP_C161	CNBP_HUMAN Cellular nucleic acid-binding protein OS=Homo sapiens OX=9606 GN=CNBP PE=1 SV=1	R	C#GESGHLAR	C#GESGHLAR	C#GESGHLAR	3	2	2	0.0211612	0.00976586	0.00590419	3
O94832	666	MYO1D	MYO1D_C666	MYO1D_HUMAN Unconventional myosin-Id OS=Homo sapiens OX=9606 GN=MYO1D PE=1 SV=2	R	C#GFQDDVAYGK	C#GFQDDVAYGK	C#GFQDDVAYGK	2	1	1	0.0474588	0.0416345	0.0127519	3
Q8IWA0	12	WDR75	WDR75_C12	WDR75_HUMAN WD repeat-containing protein 75 OS=Homo sapiens OX=9606 GN=WDR75 PE=1 SV=1	R	C#GGSELNFR	C#GGSELNFR	C#GGSELNFR	2	2	2	0.0263807	0.0159983	0.0230051	3
Q12874	274	SF3A3	SF3A3_C274	SF3A3_HUMAN Splicing factor 3A subunit 3 OS=Homo sapiens OX=9606 GN=SF3A3 PE=1 SV=1	K	C#GGTLEER	C#GGTLEER	C#GGTLEER	2	1	1	0.0637854	0.0681215	0.172459	3
Q5VZL5	1232	ZMYM4	ZMYM4_C1232	ZMYM4_HUMAN Zinc finger MYM-type protein 4 OS=Homo sapiens OX=9606 GN=ZMYM4 PE=1 SV=1	K	C#GGVEQASSSPR	C#GGVEQASSSPR	C#GGVEQASSSPR	1	1	1	0.00126831	0.00107247	0.00127264	3
P62987	115	UBA52	UBA52_C115	RL40_HUMAN Ubiquitin-60S ribosomal protein L40 OS=Homo sapiens OX=9606 GN=UBA52 PE=1 SV=2	K	C#GHTNNLRPK	C#GHTNNLRPK C#GHTNNLR	C#GHTNNLRPK C#GHTNNLR	2	3	6	0.0990944	0.0587018	0.0383981	3
P52272	676	HNRNPM	HNRNPM_C676	HNRPM_HUMAN Heterogeneous nuclear ribonucleoprotein M OS=Homo sapiens OX=9606 GN=HNRNPM PE=1 SV=3	E	C#GHVLYADIK	C#GHVLYADIK	C#GHVLYADIK	1	1	1	0.186826	0.18088	0.030936	3
Q969Y2	46	GTPBP3	GTPBP3_C46	GTPB3_HUMAN tRNA modification GTPase GTPBP3, mitochondrial OS=Homo sapiens OX=9606 GN=GTPBP3 PE=1 SV=2	R	C#GIAVIR	C#GIAVIR	C#GIAVIR	1	1	1	0.140914	0.218683	0.0727435	3
Q9BXP5	640	SRRT	SRRT_C640	SRRT_HUMAN Serrate RNA effector molecule homolog OS=Homo sapiens OX=9606 GN=SRRT PE=1 SV=1	R	C#GIIHVR	C#GIIHVR	C#GIIHVR	4	3	2	0.102277	0.0849466	0.037836	3
P12268	140	IMPDH2	IMPDH2_C140	IMDH2_HUMAN Inosine-5'-monophosphate dehydrogenase 2 OS=Homo sapiens OX=9606 GN=IMPDH2 PE=1 SV=2	F	C#GIPITDTGR	C#GIPITDTGR	C#GIPITDTGR	2	2	3	0.188612	0.186396	0.0907435	3
P26639	107	TARS	TARS_C107	SYTC_HUMAN Threonine--tRNA ligase, cytoplasmic OS=Homo sapiens OX=9606 GN=TARS PE=1 SV=3	A	C#GISQGLADNTVIAK	C#GISQGLADNTVIAK	C#GISQGLADNTVIAK	1	1	1	0.0842442	0.0728185	0.0495454	3
Q92616	1235	GCN1	GCN1_C1235	GCN1_HUMAN eIF-2-alpha kinase activator GCN1 OS=Homo sapiens OX=9606 GN=GCN1 PE=1 SV=6	R	C#GLALALNK	C#GLALALNK	C#GLALALNK	2	1	3	0.141103	0.0102242	0.00719413	3
Q9UHI6	98	DDX20	DDX20_C98	DDX20_HUMAN Probable ATP-dependent RNA helicase DDX20 OS=Homo sapiens OX=9606 GN=DDX20 PE=1 SV=2	R	C#GLDLIVQAK	C#GLDLIVQAK	C#GLDLIVQAK	2	2	2	0.104006	0.0345877	0.0343256	3
Q14008	1946	CKAP5	CKAP5_C1946	CKAP5_HUMAN Cytoskeleton-associated protein 5 OS=Homo sapiens OX=9606 GN=CKAP5 PE=1 SV=3	R	C#GLDNTK	C#GLDNTK	C#GLDNTK	1	1	1	0.0937359	0.158011	0.0892579	3
Q9H8H0	368	NOL11	NOL11_C368	NOL11_HUMAN Nucleolar protein 11 OS=Homo sapiens OX=9606 GN=NOL11 PE=1 SV=1	G	C#GLGFQNSEQSR	C#GLGFQNSEQSR	C#GLGFQNSEQSR	1	1	1	0.211033	0.00495338	0.139762	3
Q92945	436	KHSRP	KHSRP_C436	FUBP2_HUMAN Far upstream element-binding protein 2 OS=Homo sapiens OX=9606 GN=KHSRP PE=1 SV=4	K	C#GLVIGR	C#GLVIGR	C#GLVIGR	2	1	2	0.173876	0.0546849	0.0570202	3
Q14008	695	CKAP5	CKAP5_C695	CKAP5_HUMAN Cytoskeleton-associated protein 5 OS=Homo sapiens OX=9606 GN=CKAP5 PE=1 SV=3	K	C#GNNAK	C#GNNAK	C#GNNAK	1	1	1	0.257443	0.167899	0.320578	3
O95218	20	ZRANB2	ZRANB2_C20	ZRAB2_HUMAN Zinc finger Ran-binding domain-containing protein 2 OS=Homo sapiens OX=9606 GN=ZRANB2 PE=1 SV=2	K	C#GNVNFAR	C#GNVNFAR	C#GNVNFAR	2	2	2	0.246692	0.0801926	0.0759477	3
P21912	68	SDHB	SDHB_C68	SDHB_HUMAN Succinate dehydrogenase [ubiquinone] iron-sulfur subunit, mitochondrial OS=Homo sapiens OX=9606 GN=SDHB PE=1 SV=3	K	C#GPMVLDALIK	C#GPMVLDALIK	C#GPMVLDALIK	1	1	3	0.204722	0.112281	0.0160858	3
Q96C92	371	ENTR1	ENTR1_C371	ENTR1_HUMAN Endosome-associated-trafficking regulator 1 OS=Homo sapiens OX=9606 GN=ENTR1 PE=1 SV=3	R	C#GQGASLTVVK	C#GQGASLTVVK	C#GQGASLTVVK	1	1	1	0.00522345	0.0679579	0.00753495	3
Q7Z2Z2	402	EFL1	EFL1_C402	EFL1_HUMAN Elongation factor-like GTPase 1 OS=Homo sapiens OX=9606 GN=EFL1 PE=1 SV=2	K	C#GSEDTAPVIIFVSK	C#GSEDTAPVIIFVSK	C#GSEDTAPVIIFVSK	1	1	2	0.00398704	0.000675643	0.0265586	3
P42704	130	LRPPRC	LRPPRC_C130	LPPRC_HUMAN Leucine-rich PPR motif-containing protein, mitochondrial OS=Homo sapiens OX=9606 GN=LRPPRC PE=1 SV=3	S	C#GSLLPELK	C#GSLLPELK	C#GSLLPELK	1	2	1	0.106631	0.073013	0.191728	3
P54646	174	PRKAA2	PRKAA2_C174	AAPK2_HUMAN 5'-AMP-activated protein kinase catalytic subunit alpha-2 OS=Homo sapiens OX=9606 GN=PRKAA2 PE=1 SV=2	S	C#GSPNYAAPEVISGR	C#GSPNYAAPEVISGR	C#GSPNYAAPEVISGR	1	1	1	0.0329264	0.00417599	0.0756593	3
Q7Z4V5	631	HDGFL2	HDGFL2_C631	HDGR2_HUMAN Hepatoma-derived growth factor-related protein 2 OS=Homo sapiens OX=9606 GN=HDGFL2 PE=1 SV=1	R	C#GSSEDLHDSVR	C#GSSEDLHDSVR	C#GSSEDLHDSVR	2	1	1	0.011623	0.0384618	0.0121864	3
P41091	105	EIF2S3	EIF2S3_C105	IF2G_HUMAN Eukaryotic translation initiation factor 2 subunit 3 OS=Homo sapiens OX=9606 GN=EIF2S3 PE=1 SV=3	S	C#GSSTPDEFPTDIPGTK	C#GSSTPDEFPTDIPGTK	C#GSSTPDEFPTDIPGTK	2	3	3	0.0323981	0.0258601	0.0341079	3
Q9H267	259	VPS33B	VPS33B_C259	VP33B_HUMAN Vacuolar protein sorting-associated protein 33B OS=Homo sapiens OX=9606 GN=VPS33B PE=1 SV=2	K	C#GSVDFGPEVTSSDK	C#GSVDFGPEVTSSDK	C#GSVDFGPEVTSSDK	2	1	2	0.000664284	0.000253853	0.0433013	3
P15880	188	RPS2	RPS2_C188	RS2_HUMAN 40S ribosomal protein S2 OS=Homo sapiens OX=9606 GN=RPS2 PE=1 SV=2	R	C#GSVLVR	C#GSVLVR	C#GSVLVR	2	3	4	0.121092	0.115112	0.111368	3
P62244	72	RPS15A	RPS15A_C72	RS15A_HUMAN 40S ribosomal protein S15a OS=Homo sapiens OX=9606 GN=RPS15A PE=1 SV=2	K	C#GVISPR	C#GVISPR	C#GVISPR	2	2	3	0.0957883	0.0732487	0.0568687	3
P42356	1812	PI4KA	PI4KA_C1812	PI4KA_HUMAN Phosphatidylinositol 4-kinase alpha OS=Homo sapiens OX=9606 GN=PI4KA PE=1 SV=4	R	C#GVSELEK	C#GVSELEK	C#GVSELEK	1	1	1	0.0871636	0.397692	0.260439	3
Q9H0C8	301	ILKAP	ILKAP_C301	ILKAP_HUMAN Integrin-linked kinase-associated serine/threonine phosphatase 2C OS=Homo sapiens OX=9606 GN=ILKAP PE=1 SV=1	R	C#GVTSVPDIR	C#GVTSVPDIR	C#GVTSVPDIR	1	2	1	0.0375666	0.160325	0.391306	3
Q13144	196	EIF2B5	EIF2B5_C196	EI2BE_HUMAN Translation initiation factor eIF-2B subunit epsilon OS=Homo sapiens OX=9606 GN=EIF2B5 PE=1 SV=3	R	C#HEDNVVVAVDSTTNR	C#HEDNVVVAVDSTTNR	C#HEDNVVVAVDSTTNR	3	2	2	0.00142035	0.00185865	0.000576742	3
Q9UGI8	164	TES	TES_C164	TES_HUMAN Testin OS=Homo sapiens OX=9606 GN=TES PE=1 SV=1	K	C#HELSPR	C#HELSPR	C#HELSPR	1	1	2	0.0280417	0.0202362	0.0849653	3
P36873	172	PPP1CC	PPP1CC_C172	PP1G_HUMAN Serine/threonine-protein phosphatase PP1-gamma catalytic subunit OS=Homo sapiens OX=9606 GN=PPP1CC PE=1 SV=1	C	C#HGGLSPDLQSMEQIR	C#HGGLSPDLQSMEQIR	C#HGGLSPDLQSMEQIR	1	1	1	0.0543453	0.0491682	0.0317518	3
O15270	99	SPTLC2	SPTLC2_C99	SPTC2_HUMAN Serine palmitoyltransferase 2 OS=Homo sapiens OX=9606 GN=SPTLC2 PE=1 SV=1	K	C#HHATER	C#HHATER	C#HHATER	2	2	1	0.0900463	0.157407	0.0530988	3
Q9UHI6	181	DDX20	DDX20_C181	DDX20_HUMAN Probable ATP-dependent RNA helicase DDX20 OS=Homo sapiens OX=9606 GN=DDX20 PE=1 SV=2	K	C#HIAVGSPGR	C#HIAVGSPGR	C#HIAVGSPGR	1	2	1	0.0433654	0.0369095	0.0198246	3
Q02543	22	RPL18A	RPL18A_C22	RL18A_HUMAN 60S ribosomal protein L18a OS=Homo sapiens OX=9606 GN=RPL18A PE=1 SV=2	K	C#HTPPLYR	C#HTPPLYR	C#HTPPLYR	10	15	11	0.0779799	0.0530682	0.0405953	3
O95347	585	SMC2	SMC2_C585	SMC2_HUMAN Structural maintenance of chromosomes protein 2 OS=Homo sapiens OX=9606 GN=SMC2 PE=1 SV=2	R	C#IAPETLR	C#IAPETLR	C#IAPETLR	2	2	2	0.0704963	0.0377163	0.0352063	3
Q96J01	134	THOC3	THOC3_C134	THOC3_HUMAN THO complex subunit 3 OS=Homo sapiens OX=9606 GN=THOC3 PE=1 SV=1	K	C#IATVNTK	C#IATVNTK	C#IATVNTK	1	1	1	0.0254676	0.0301636	0.0177863	3
O94826	502	TOMM70	TOMM70_C502	TOM70_HUMAN Mitochondrial import receptor subunit TOM70 OS=Homo sapiens OX=9606 GN=TOMM70 PE=1 SV=1	K	C#IDLEPDNATTYVHK	C#IDLEPDNATTYVHK	C#IDLEPDNATTYVHK	3	3	4	0.0910749	0.0513317	0.0201055	3
Q15185	58	PTGES3	PTGES3_C58	TEBP_HUMAN Prostaglandin E synthase 3 OS=Homo sapiens OX=9606 GN=PTGES3 PE=1 SV=1	H	C#IDPNDSK	C#IDPNDSK	C#IDPNDSK	1	1	1	0.0985145	0.0255566	0.0519153	3
Q16543	336	CDC37	CDC37_C336	CDC37_HUMAN Hsp90 co-chaperone Cdc37 OS=Homo sapiens OX=9606 GN=CDC37 PE=1 SV=1	R	C#IDSGLWVPNSK	C#IDSGLWVPNSK	C#IDSGLWVPNSK	1	1	2	0.0240946	0.00419232	0.0894357	3
Q9UNS2	383	COPS3	COPS3_C383	CSN3_HUMAN COP9 signalosome complex subunit 3 OS=Homo sapiens OX=9606 GN=COPS3 PE=1 SV=3	K	C#IELDER	C#IELDER	C#IELDER	1	1	2	0.245457	0.0976679	0.27535	3
Q96PM5	136	RCHY1	RCHY1_C136	ZN363_HUMAN RING finger and CHY zinc finger domain-containing protein 1 OS=Homo sapiens OX=9606 GN=RCHY1 PE=1 SV=1	K	C#IENVSR	C#IENVSR	C#IENVSR	1	1	1	0.146649	0.233968	0.134733	3
Q9Y5L4	50	TIMM13	TIMM13_C50	TIM13_HUMAN Mitochondrial import inner membrane translocase subunit Tim13 OS=Homo sapiens OX=9606 GN=TIMM13 PE=1 SV=1	K	C#IGKPGGSLDNSEQK	C#IGKPGGSLDNSEQK	C#IGKPGGSLDNSEQK	1	2	2	0.180583	0.286463	0.00565278	3
P60981	46	DSTN	DSTN_C46	DEST_HUMAN Destrin OS=Homo sapiens OX=9606 GN=DSTN PE=1 SV=3	K	C#IIVEEGK	C#IIVEEGK	C#IIVEEGK	1	1	2	0.085085	0.0348766	0.018846	3
O94832	589	MYO1D	MYO1D_C589	MYO1D_HUMAN Unconventional myosin-Id OS=Homo sapiens OX=9606 GN=MYO1D PE=1 SV=2	R	C#IKPNDK C#IKPNDKK	C#IKPNDK	C#IKPNDKK C#IKPNDK	2	1	3	0.269686	0.335199	0.228031	3
Q9GZT3	48	SLIRP	SLIRP_C48	SLIRP_HUMAN SRA stem-loop-interacting RNA-binding protein, mitochondrial OS=Homo sapiens OX=9606 GN=SLIRP PE=1 SV=1	R	C#ILPFDK	C#ILPFDK	C#ILPFDK	1	2	2	0.392149	0.114699	0.0481796	3
P14678	19	SNRPB	SNRPB_C19	RSMB_HUMAN Small nuclear ribonucleoprotein-associated proteins B and B' OS=Homo sapiens OX=9606 GN=SNRPB PE=1 SV=2	R	C#ILQDGR	C#ILQDGR	C#ILQDGR	2	2	4	0.0951125	0.0900296	0.152354	3
O15270	425	SPTLC2	SPTLC2_C425	SPTC2_HUMAN Serine palmitoyltransferase 2 OS=Homo sapiens OX=9606 GN=SPTLC2 PE=1 SV=1	K	C#IMGQDGTSLGK	C#IMGQDGTSLGK	C#IMGQDGTSLGK	1	1	1	0.0211881	0.00688658	0.00386362	3
P10809	447	HSPD1	HSPD1_C447	CH60_HUMAN 60 kDa heat shock protein, mitochondrial OS=Homo sapiens OX=9606 GN=HSPD1 PE=1 SV=2	R	C#IPALDSLTPANEDQK	C#IPALDSLTPANEDQK	C#IPALDSLTPANEDQK	4	7	9	0.000614314	0.00142106	0.000538782	3
Q9BYI3	300	FAM126A	FAM126A_C300	HYCCI_HUMAN Hyccin OS=Homo sapiens OX=9606 GN=FAM126A PE=1 SV=2	R	C#IQVEITPTSSR	C#IQVEITPTSSR	C#IQVEITPTSSR	1	1	1	0.0376122	0.215667	0.0262807	3
Q9NV70	650	EXOC1	EXOC1_C650	EXOC1_HUMAN Exocyst complex component 1 OS=Homo sapiens OX=9606 GN=EXOC1 PE=1 SV=4	K	C#ISNQIR	C#ISNQIR	C#ISNQIR	2	1	1	0.131629	0.075092	0.099129	3
Q9P2I0	522	CPSF2	CPSF2_C522	CPSF2_HUMAN Cleavage and polyadenylation specificity factor subunit 2 OS=Homo sapiens OX=9606 GN=CPSF2 PE=1 SV=2	K	C#ISTTESIEIK	C#ISTTESIEIK	C#ISTTESIEIK	1	1	1	0.00329349	0.0175749	0.000703689	3
Q8N0X7	562	SPART	SPART_C562	SPART_HUMAN Spartin OS=Homo sapiens OX=9606 GN=SPART PE=1 SV=1	K	C#IVNNVSAETVQTVR	C#IVNNVSAETVQTVR	C#IVNNVSAETVQTVR	1	1	2	0.173918	0.033368	0.00443918	3
Q5VWZ2	12	LYPLAL1	LYPLAL1_C12	LYPL1_HUMAN Lysophospholipase-like protein 1 OS=Homo sapiens OX=9606 GN=LYPLAL1 PE=1 SV=3	R	C#IVSPAGR	C#IVSPAGR	C#IVSPAGR	1	2	3	0.0645909	0.0562711	0.258901	3
Q8TDN6	115	BRIX1	BRIX1_C115	BRX1_HUMAN Ribosome biogenesis protein BRX1 homolog OS=Homo sapiens OX=9606 GN=BRIX1 PE=1 SV=2	K	C#IYFEAK	C#IYFEAK	C#IYFEAK	1	2	1	0.345281	0.229194	0.116179	3
Q8WUM4	524	PDCD6IP	PDCD6IP_C524	PDC6I_HUMAN Programmed cell death 6-interacting protein OS=Homo sapiens OX=9606 GN=PDCD6IP PE=1 SV=1	L	C#KPEPELNAAIPSANPAK	C#KPEPELNAAIPSANPAK	C#KPEPELNAAIPSANPAK	1	1	1	0.165594	0.0158042	0.0497219	3
O95104	54	SCAF4	SCAF4_C54	SCAF4_HUMAN SR-related and CTD-associated factor 4 OS=Homo sapiens OX=9606 GN=SCAF4 PE=1 SV=3	K	C#KPEYK	C#KPEYK	C#KPEYK	2	1	1	0.230317	0.379845	0.0820993	3
Q8NFP7	3	NUDT10	NUDT10_C3	NUD10_HUMAN Diphosphoinositol polyphosphate phosphohydrolase 3-alpha OS=Homo sapiens OX=9606 GN=NUDT10 PE=1 SV=1	K	C#KPNQTR	C#KPNQTR	C#KPNQTR	1	2	1	0.271024	0.261588	0.228941	3
Q12906	203	ILF3	ILF3_C203	ILF3_HUMAN Interleukin enhancer-binding factor 3 OS=Homo sapiens OX=9606 GN=ILF3 PE=1 SV=3	K	C#LAALASLR	C#LAALASLR	C#LAALASLR	1	1	2	0.0419653	0.166516	0.0267007	3
Q8N8A6	338	DDX51	DDX51_C338	DDX51_HUMAN ATP-dependent RNA helicase DDX51 OS=Homo sapiens OX=9606 GN=DDX51 PE=1 SV=3	R	C#LADIVVATPGR	C#LADIVVATPGR	C#LADIVVATPGR	1	1	2	0.0071025	0.00345329	0.0311067	3
P16615	560	ATP2A2	ATP2A2_C560	AT2A2_HUMAN Sarcoplasmic/endoplasmic reticulum calcium ATPase 2 OS=Homo sapiens OX=9606 GN=ATP2A2 PE=1 SV=1	R	C#LALATHDNPLR	C#LALATHDNPLR	C#LALATHDNPLR	1	4	4	0.00185388	0.00686135	0.000626116	3
O75691	1794	UTP20	UTP20_C1794	UTP20_HUMAN Small subunit processome component 20 homolog OS=Homo sapiens OX=9606 GN=UTP20 PE=1 SV=3	K	C#LASTTK	C#LASTTK	C#LASTTK	1	1	1	0.214232	0.22566	0.0977816	3
P49327	1759	FASN	FASN_C1759	FAS_HUMAN Fatty acid synthase OS=Homo sapiens OX=9606 GN=FASN PE=1 SV=3	R	C#LATHGR	C#LATHGR	C#LATHGR	2	3	2	0.0536867	0.0978937	0.0654595	3
P21266	178	GSTM3	GSTM3_C178	GSTM3_HUMAN Glutathione S-transferase Mu 3 OS=Homo sapiens OX=9606 GN=GSTM3 PE=1 SV=3	K	C#LDEFPNLK	C#LDEFPNLK	C#LDEFPNLK	1	1	1	0.0147592	0.0238363	0.00544201	3
Q9BY77	338	POLDIP3	POLDIP3_C338	PDIP3_HUMAN Polymerase delta-interacting protein 3 OS=Homo sapiens OX=9606 GN=POLDIP3 PE=1 SV=2	R	C#LDGQPMK	C#LDGQPMK	C#LDGQPMK	2	2	1	0.0381777	0.0716361	0.0078273	3
Q9BQG0	968	MYBBP1A	MYBBP1A_C968	MBB1A_HUMAN Myb-binding protein 1A OS=Homo sapiens OX=9606 GN=MYBBP1A PE=1 SV=2	S	C#LDLNLVTR	C#LDLNLVTR	C#LDLNLVTR	1	1	1	0.154393	0.037559	0.0288562	3
Q4VCS5	741	AMOT	AMOT_C741	AMOT_HUMAN Angiomotin OS=Homo sapiens OX=9606 GN=AMOT PE=1 SV=1	R	C#LDMEGR	C#LDMEGR	C#LDMEGR	4	4	4	0.0841308	0.0982776	0.0819422	3
P11177	249	PDHB	PDHB_C249	ODPB_HUMAN Pyruvate dehydrogenase E1 component subunit beta, mitochondrial OS=Homo sapiens OX=9606 GN=PDHB PE=1 SV=3	H	C#LEAAAVLSK	C#LEAAAVLSK	C#LEAAAVLSK	2	1	2	0.0663061	0.0320669	0.0873869	3
Q99797	281	MIPEP	MIPEP_C281	MIPEP_HUMAN Mitochondrial intermediate peptidase OS=Homo sapiens OX=9606 GN=MIPEP PE=1 SV=2	K	C#LEELLSSR	C#LEELLSSR	C#LEELLSSR	1	1	2	0.0355829	0.0661661	0.0694163	3
P49721	163	PSMB2	PSMB2_C163	PSB2_HUMAN Proteasome subunit beta type-2 OS=Homo sapiens OX=9606 GN=PSMB2 PE=1 SV=1	K	C#LEELQK	C#LEELQK	C#LEELQK	1	1	2	0.179152	0.0907955	0.186558	3
P17812	491	CTPS1	CTPS1_C491	PYRG1_HUMAN CTP synthase 1 OS=Homo sapiens OX=9606 GN=CTPS1 PE=1 SV=2	K	C#LEEQGLK	C#LEEQGLK	C#LEEQGLK	2	1	2	0.011963	0.00656132	0.03044	3
P08238	412	HSP90AB1	HSP90AB1_C412	HS90B_HUMAN Heat shock protein HSP 90-beta OS=Homo sapiens OX=9606 GN=HSP90AB1 PE=1 SV=4	K	C#LELFSELAEDKENYKK	C#LELFSELAEDKENYKK	C#LELFSELAEDKENYKK C#LELFSELAEDK C#LELFSELAEDKENYK	2	2	7	0.131461	0.13077	0.000965537	3
Q9H4A4	69	RNPEP	RNPEP_C69	AMPB_HUMAN Aminopeptidase B OS=Homo sapiens OX=9606 GN=RNPEP PE=1 SV=2	R	C#LEPEGAAELR	C#LEPEGAAELR	C#LEPEGAAELR	1	1	2	0.267221	0.26611	0.206387	3
Q9H583	1237	HEATR1	HEATR1_C1237	HEAT1_HUMAN HEAT repeat-containing protein 1 OS=Homo sapiens OX=9606 GN=HEATR1 PE=1 SV=3	R	C#LEPLPQEQGNMEYTK	C#LEPLPQEQGNMEYTK	C#LEPLPQEQGNMEYTK	1	3	4	0.0839154	0.067146	0.0165231	3
O00411	319	POLRMT	POLRMT_C319	RPOM_HUMAN DNA-directed RNA polymerase, mitochondrial OS=Homo sapiens OX=9606 GN=POLRMT PE=1 SV=2	R	C#LEQMSQEGLK	C#LEQMSQEGLK	C#LEQMSQEGLK	2	1	2	0.119843	0.0560378	0.215106	3
Q15185	40	PTGES3	PTGES3_C40	TEBP_HUMAN Prostaglandin E synthase 3 OS=Homo sapiens OX=9606 GN=PTGES3 PE=1 SV=1	S	C#LGGSDNFK	C#LGGSDNFK	C#LGGSDNFK	3	2	1	0.314021	0.0302231	0.0467568	3
Q13642	71	FHL1	FHL1_C71	FHL1_HUMAN Four and a half LIM domains protein 1 OS=Homo sapiens OX=9606 GN=FHL1 PE=1 SV=4	K	C#LHPLANETFVAK	C#LHPLANETFVAK	C#LHPLANETFVAK	2	2	2	0.00909015	0.151618	0.00434667	3
O95831	256	AIFM1	AIFM1_C256	AIFM1_HUMAN Apoptosis-inducing factor 1, mitochondrial OS=Homo sapiens OX=9606 GN=AIFM1 PE=1 SV=1	K	C#LIATGGTPR	C#LIATGGTPR	C#LIATGGTPR	1	2	2	0.0447407	0.077814	0.0898018	3
Q9UKN8	788	GTF3C4	GTF3C4_C788	TF3C4_HUMAN General transcription factor 3C polypeptide 4 OS=Homo sapiens OX=9606 GN=GTF3C4 PE=1 SV=2	R	C#LLHDSIAR	C#LLHDSIAR	C#LLHDSIAR	1	1	1	0.161996	0.26395	0.0139332	3
Q99661	287	KIF2C	KIF2C_C287	KIF2C_HUMAN Kinesin-like protein KIF2C OS=Homo sapiens OX=9606 GN=KIF2C PE=1 SV=2	K	C#LLLVHEPK	C#LLLVHEPK	C#LLLVHEPK	1	2	1	0.0868728	0.0318186	0.0161066	3
O43772	136	SLC25A20	SLC25A20_C136	MCAT_HUMAN Mitochondrial carnitine/acylcarnitine carrier protein OS=Homo sapiens OX=9606 GN=SLC25A20 PE=1 SV=1	K	C#LLQIQASSGESK	C#LLQIQASSGESK	C#LLQIQASSGESK	1	1	1	0.00220577	0.0280482	0.00533748	3
P57737	695	CORO7	CORO7_C695	CORO7_HUMAN Coronin-7 OS=Homo sapiens OX=9606 GN=CORO7 PE=1 SV=2	R	C#LLVSGFDSQSER	C#LLVSGFDSQSER	C#LLVSGFDSQSER	1	1	1	0.141137	0.29577	0.0788359	3
P78527	4106	PRKDC	PRKDC_C4106	PRKDC_HUMAN DNA-dependent protein kinase catalytic subunit OS=Homo sapiens OX=9606 GN=PRKDC PE=1 SV=3	K	C#LMDQATDPNILGR	C#LMDQATDPNILGR	C#LMDQATDPNILGR	3	4	5	0.00572421	0.00316474	0.0029408	3
Q92973	103	TNPO1	TNPO1_C103	TNPO1_HUMAN Transportin-1 OS=Homo sapiens OX=9606 GN=TNPO1 PE=1 SV=2	E	C#LNNIGDSSPLIR	C#LNNIGDSSPLIR	C#LNNIGDSSPLIR	1	1	1	0.337187	0.0197226	0.196352	3
Q14318	274	FKBP8	FKBP8_C274	FKBP8_HUMAN Peptidyl-prolyl cis-trans isomerase FKBP8 OS=Homo sapiens OX=9606 GN=FKBP8 PE=1 SV=2	K	C#LNNLAASQLK	C#LNNLAASQLK	C#LNNLAASQLK	2	1	2	0.0538614	0.00131241	0.0591041	3
P61978	132	HNRNPK	HNRNPK_C132	HNRPK_HUMAN Heterogeneous nuclear ribonucleoprotein K OS=Homo sapiens OX=9606 GN=HNRNPK PE=1 SV=1	E	C#LNYQHYK	C#LNYQHYK	C#LNYQHYK	1	1	1	0.259127	0.0980324	0.167077	3
Q02543	16	RPL18A	RPL18A_C16	RL18A_HUMAN 60S ribosomal protein L18a OS=Homo sapiens OX=9606 GN=RPL18A PE=1 SV=2	R	C#LPTPK	C#LPTPK	C#LPTPK	4	3	6	0.163976	0.139356	0.170709	3
Q9BQ52	609	ELAC2	ELAC2_C609	RNZ2_HUMAN Zinc phosphodiesterase ELAC protein 2 OS=Homo sapiens OX=9606 GN=ELAC2 PE=1 SV=2	K	C#LQEGAEISSPAVER	C#LQEGAEISSPAVER	C#LQEGAEISSPAVER	2	3	3	0.0482475	0.00079123	0.000577387	3
O15027	1522	SEC16A	SEC16A_C1522	SC16A_HUMAN Protein transport protein Sec16A OS=Homo sapiens OX=9606 GN=SEC16A PE=1 SV=4	K	C#LQNENLIDK	C#LQNENLIDK	C#LQNENLIDK	1	2	1	0.00794221	0.120939	0.0125356	3
Q92616	2558	GCN1	GCN1_C2558	GCN1_HUMAN eIF-2-alpha kinase activator GCN1 OS=Homo sapiens OX=9606 GN=GCN1 PE=1 SV=6	K	C#LQNPSSDIR	C#LQNPSSDIR	C#LQNPSSDIR	2	2	2	0.175217	0.0356624	0.117919	3
Q9UHY1	307	NRBP1	NRBP1_C307	NRBP_HUMAN Nuclear receptor-binding protein OS=Homo sapiens OX=9606 GN=NRBP1 PE=1 SV=1	K	C#LQSEPAR	C#LQSEPAR	C#LQSEPAR	1	1	2	0.145516	0.34936	0.0425809	3
Q9H6R7	574	WDCP	WDCP_C574	WDCP_HUMAN WD repeat and coiled-coil-containing protein OS=Homo sapiens OX=9606 GN=WDCP PE=1 SV=1	R	C#LSELTNR	C#LSELTNR	C#LSELTNR	1	1	1	0.218348	0.307481	0.0931826	3
P52597	267	HNRNPF	HNRNPF_C267	HNRPF_HUMAN Heterogeneous nuclear ribonucleoprotein F OS=Homo sapiens OX=9606 GN=HNRNPF PE=1 SV=3	Y	C#LSGMYDHR	C#LSGMYDHR	C#LSGMYDHR	1	2	1	0.0987982	0.114804	0.066278	3
Q9Y2U8	838	LEMD3	LEMD3_C838	MAN1_HUMAN Inner nuclear membrane protein Man1 OS=Homo sapiens OX=9606 GN=LEMD3 PE=1 SV=2	K	C#LSPEYAGK	C#LSPEYAGK	C#LSPEYAGK	2	2	1	0.155443	0.283836	0.183632	3
Q9NVI1	594	FANCI	FANCI_C594	FANCI_HUMAN Fanconi anemia group I protein OS=Homo sapiens OX=9606 GN=FANCI PE=1 SV=4	R	C#LSQQADVR	C#LSQQADVR	C#LSQQADVR	1	1	1	0.0324757	0.0268987	0.0301268	3
O94979	1130	SEC31A	SEC31A_C1130	SC31A_HUMAN Protein transport protein Sec31A OS=Homo sapiens OX=9606 GN=SEC31A PE=1 SV=3	R	C#LSSATDPQTK	C#LSSATDPQTK	C#LSSATDPQTK	1	2	1	0.383173	0.228027	0.00842025	3
P52209	289	PGD	PGD_C289	6PGD_HUMAN 6-phosphogluconate dehydrogenase, decarboxylating OS=Homo sapiens OX=9606 GN=PGD PE=1 SV=3	R	C#LSSLKDER	C#LSSLKDER	C#LSSLKDER	2	1	3	0.032544	0.0367778	0.014434	3
P49588	773	AARS	AARS_C773	SYAC_HUMAN Alanine--tRNA ligase, cytoplasmic OS=Homo sapiens OX=9606 GN=AARS PE=1 SV=2	K	C#LSVMEAK	C#LSVMEAK	C#LSVMEAK	3	2	4	0.0284275	0.0170109	0.00462792	3
Q9H845	179	ACAD9	ACAD9_C179	ACAD9_HUMAN Complex I assembly factor ACAD9, mitochondrial OS=Homo sapiens OX=9606 GN=ACAD9 PE=1 SV=1	F	C#LTEPASGSDAASIR	C#LTEPASGSDAASIR	C#LTEPASGSDAASIR	1	1	1	0.206766	0.321846	0.372711	3
O00566	14	MPHOSPH10	MPHOSPH10_C14	MPP10_HUMAN U3 small nucleolar ribonucleoprotein protein MPP10 OS=Homo sapiens OX=9606 GN=MPHOSPH10 PE=1 SV=2	R	C#LTEVGK	C#LTEVGK	C#LTEVGK	1	1	1	0.0503899	0.042006	0.0657644	3
P53618	877	COPB1	COPB1_C877	COPB_HUMAN Coatomer subunit beta OS=Homo sapiens OX=9606 GN=COPB1 PE=1 SV=3	K	C#LTPEK	C#LTPEK	C#LTPEK	2	3	2	0.181243	0.210672	0.098058	3
Q9UQ35	1509	SRRM2	SRRM2_C1509	SRRM2_HUMAN Serine/arginine repetitive matrix protein 2 OS=Homo sapiens OX=9606 GN=SRRM2 PE=1 SV=2	K	C#LTPQR	C#LTPQR	C#LTPQR	1	1	1	0.191531	0.187254	0.162227	3
O75153	1196	CLUH	CLUH_C1196	CLU_HUMAN Clustered mitochondria protein homolog OS=Homo sapiens OX=9606 GN=CLUH PE=1 SV=2	K	C#LTQQAVALQR	C#LTQQAVALQR	C#LTQQAVALQR	1	2	2	0.00603834	0.0784421	0.00891295	3
Q6SZW1	311	SARM1	SARM1_C311	SARM1_HUMAN Sterile alpha and TIR motif-containing protein 1 OS=Homo sapiens OX=9606 GN=SARM1 PE=1 SV=1	R	C#LVDASDTSQGR	C#LVDASDTSQGR	C#LVDASDTSQGR	1	1	1	0.101889	0.373583	0.00289688	3
Q0VDF9	89	HSPA14	HSPA14_C89	HSP7E_HUMAN Heat shock 70 kDa protein 14 OS=Homo sapiens OX=9606 GN=HSPA14 PE=1 SV=1	K	C#LVIEK	C#LVIEK	C#LVIEK	1	1	1	0.334165	0.381995	0.31319	3
P13639	728	EEF2	EEF2_C728	EF2_HUMAN Elongation factor 2 OS=Homo sapiens OX=9606 GN=EEF2 PE=1 SV=4	R	C#LYASVLTAQPR	C#LYASVLTAQPR	C#LYASVLTAQPR	1	1	4	0.00615492	0.00331588	0.016678	3
P14866	404	HNRNPL	HNRNPL_C404	HNRPL_HUMAN Heterogeneous nuclear ribonucleoprotein L OS=Homo sapiens OX=9606 GN=HNRNPL PE=1 SV=2	F	C#LYGNVEK	C#LYGNVEK	C#LYGNVEK	2	1	2	0.143915	0.0292778	0.13277	3
Q9H974	312	QTRT2	QTRT2_C312	QTRT2_HUMAN Queuine tRNA-ribosyltransferase accessory subunit 2 OS=Homo sapiens OX=9606 GN=QTRT2 PE=1 SV=1	K	C#MDQIK	C#MDQIK	C#MDQIK	1	2	3	0.377069	0.252904	0.241306	3
P67870	140	CSNK2B	CSNK2B_C140	CSK2B_HUMAN Casein kinase II subunit beta OS=Homo sapiens OX=9606 GN=CSNK2B PE=1 SV=1	K	C#MDVYTPK	C#MDVYTPK	C#MDVYTPK	1	1	2	0.125175	0.0967622	0.141091	3
Q6AI08	720	HEATR6	HEATR6_C720	HEAT6_HUMAN HEAT repeat-containing protein 6 OS=Homo sapiens OX=9606 GN=HEATR6 PE=1 SV=1	K	C#MGEADPSIQLHGAK	C#MGEADPSIQLHGAK	C#MGEADPSIQLHGAK	1	1	1	0.0176433	0.0173086	0.18276	3
P35580	164	MYH10	MYH10_C164	MYH10_HUMAN Myosin-10 OS=Homo sapiens OX=9606 GN=MYH10 PE=1 SV=3	R	C#MLQDR	C#MLQDR	C#MLQDR	1	1	1	0.32258	0.24813	0.159202	3
P31948	471	STIP1	STIP1_C471	STIP1_HUMAN Stress-induced-phosphoprotein 1 OS=Homo sapiens OX=9606 GN=STIP1 PE=1 SV=1	R	C#MMAQYNR	C#MMAQYNR	C#MMAQYNR	1	2	3	0.0388718	0.125623	0.01528	3
P46013	3014	MKI67	MKI67_C3014	KI67_HUMAN Proliferation marker protein Ki-67 OS=Homo sapiens OX=9606 GN=MKI67 PE=1 SV=2	R	C#MPAPEEIVEELPASK	C#MPAPEEIVEELPASK	C#MPAPEEIVEELPASK	1	1	4	0.22517	0.00238926	0.00914447	3
P50914	54	RPL14	RPL14_C54	RL14_HUMAN 60S ribosomal protein L14 OS=Homo sapiens OX=9606 GN=RPL14 PE=1 SV=4	K	C#MQLTDFILK	C#MQLTDFILK	C#MQLTDFILK	1	1	5	0.00554841	6.79e-05	0.00155967	3
P32322	120	PYCR1	PYCR1_C120	P5CR1_HUMAN Pyrroline-5-carboxylate reductase 1, mitochondrial OS=Homo sapiens OX=9606 GN=PYCR1 PE=1 SV=2	R	C#MTNTPVVVR	C#MTNTPVVVR	C#MTNTPVVVR	3	4	3	0.170767	0.165792	0.0646338	3
O43684	129	BUB3	BUB3_C129	BUB3_HUMAN Mitotic checkpoint protein BUB3 OS=Homo sapiens OX=9606 GN=BUB3 PE=1 SV=1	P	C#NAGTFSQPEK	C#NAGTFSQPEK	C#NAGTFSQPEK	1	1	1	0.286788	0.0775808	0.359008	3
O43896	350	KIF1C	KIF1C_C350	KIF1C_HUMAN Kinesin-like protein KIF1C OS=Homo sapiens OX=9606 GN=KIF1C PE=1 SV=3	R	C#NAIINEDPNAR	C#NAIINEDPNAR	C#NAIINEDPNAR	1	1	1	0.0968592	0.118168	0.00749371	3
Q96B01	254	RAD51AP1	RAD51AP1_C254	R51A1_HUMAN RAD51-associated protein 1 OS=Homo sapiens OX=9606 GN=RAD51AP1 PE=1 SV=1	K	C#NALVTSVDSAPAAVK	C#NALVTSVDSAPAAVK	C#NALVTSVDSAPAAVK	1	1	1	0.174421	0.278728	0.00727796	3
O60333	356	KIF1B	KIF1B_C356	KIF1B_HUMAN Kinesin-like protein KIF1B OS=Homo sapiens OX=9606 GN=KIF1B PE=1 SV=5	K	C#NAVINEDPNAK	C#NAVINEDPNAK	C#NAVINEDPNAK	1	1	1	0.0214733	0.0165792	0.00473725	3
O75717	180	WDHD1	WDHD1_C180	WDHD1_HUMAN WD repeat and HMG-box DNA-binding protein 1 OS=Homo sapiens OX=9606 GN=WDHD1 PE=1 SV=1	K	C#NDVINAK	C#NDVINAK	C#NDVINAK	2	2	1	0.14552	0.0564133	0.0497044	3
O60313	801	OPA1	OPA1_C801	OPA1_HUMAN Dynamin-like 120 kDa protein, mitochondrial OS=Homo sapiens OX=9606 GN=OPA1 PE=1 SV=3	K	C#NEEHPAYLASDEITTVR	C#NEEHPAYLASDEITTVR	C#NEEHPAYLASDEITTVR	1	2	2	0.00106763	0.00140837	0.000886682	3
Q9NRZ9	205	HELLS	HELLS_C205	HELLS_HUMAN Lymphoid-specific helicase OS=Homo sapiens OX=9606 GN=HELLS PE=1 SV=1	K	C#NGQPVPFQQPK	C#NGQPVPFQQPK	C#NGQPVPFQQPK	2	2	2	0.0955951	0.0627493	0.0193809	3
P78316	457	NOP14	NOP14_C457	NOP14_HUMAN Nucleolar protein 14 OS=Homo sapiens OX=9606 GN=NOP14 PE=1 SV=3	K	C#NHPSLAEGNK	C#NHPSLAEGNK	C#NHPSLAEGNK	3	3	2	0.00445524	0.0107814	0.00481093	3
Q53EZ4	443	CEP55	CEP55_C443	CEP55_HUMAN Centrosomal protein of 55 kDa OS=Homo sapiens OX=9606 GN=CEP55 PE=1 SV=3	K	C#NIQYPATEHR	C#NIQYPATEHR	C#NIQYPATEHR	2	1	2	0.13596	0.0222503	0.0150674	3
Q5JRA6	1486	MIA3	MIA3_C1486	TGO1_HUMAN Transport and Golgi organization protein 1 homolog OS=Homo sapiens OX=9606 GN=MIA3 PE=1 SV=1	K	C#NLEDQVK	C#NLEDQVK	C#NLEDQVK	1	1	1	0.121953	0.15887	0.0958128	3
P12270	224	TPR	TPR_C224	TPR_HUMAN Nucleoprotein TPR OS=Homo sapiens OX=9606 GN=TPR PE=1 SV=3	K	C#NLENK	C#NLENK	C#NLENK	1	1	1	0.206623	0.190072	0.119498	3
Q9NVP1	183	DDX18	DDX18_C183	DDX18_HUMAN ATP-dependent RNA helicase DDX18 OS=Homo sapiens OX=9606 GN=DDX18 PE=1 SV=2	L	C#NLVNENTLK	C#NLVNENTLK	C#NLVNENTLK	1	1	1	0.369973	0.012516	0.304401	3
P41252	1001	IARS	IARS_C1001	SYIC_HUMAN Isoleucine--tRNA ligase, cytoplasmic OS=Homo sapiens OX=9606 GN=IARS PE=1 SV=2	K	C#NLVPTDEITVYYK	C#NLVPTDEITVYYK	C#NLVPTDEITVYYK	1	1	1	0.177812	0.0264751	0.00907451	3
Q06124	318	PTPN11	PTPN11_C318	PTN11_HUMAN Tyrosine-protein phosphatase non-receptor type 11 OS=Homo sapiens OX=9606 GN=PTPN11 PE=1 SV=2	K	C#NNSKPK	C#NNSKPK	C#NNSKPK	2	2	2	0.112596	0.300059	0.23804	3
Q96J02	57	ITCH	ITCH_C57	ITCH_HUMAN E3 ubiquitin-protein ligase Itchy homolog OS=Homo sapiens OX=9606 GN=ITCH PE=1 SV=2	K	C#NNTNSPK	C#NNTNSPK	C#NNTNSPK	2	1	2	0.143208	0.127073	0.113543	3
P62306	66	SNRPF	SNRPF_C66	RUXF_HUMAN Small nuclear ribonucleoprotein F OS=Homo sapiens OX=9606 GN=SNRPF PE=1 SV=1	R	C#NNVLYIR	C#NNVLYIR	C#NNVLYIR	2	3	1	0.141066	0.0209458	0.0829184	3
Q01780	555	EXOSC10	EXOSC10_C555	EXOSX_HUMAN Exosome component 10 OS=Homo sapiens OX=9606 GN=EXOSC10 PE=1 SV=2	C	C#NPVPPLVR	C#NPVPPLVR	C#NPVPPLVR	1	1	1	0.369006	0.383644	0.382872	3
Q00535	269	CDK5	CDK5_C269	CDK5_HUMAN Cyclin-dependent-like kinase 5 OS=Homo sapiens OX=9606 GN=CDK5 PE=1 SV=3	K	C#NPVQR	C#NPVQR	C#NPVQR	2	2	3	0.284807	0.158629	0.307361	3
Q9UBQ0	15	VPS29	VPS29_C15	VPS29_HUMAN Vacuolar protein sorting-associated protein 29 OS=Homo sapiens OX=9606 GN=VPS29 PE=1 SV=1	R	C#NSLPAK	C#NSLPAK	C#NSLPAK	2	2	1	0.142061	0.112441	0.0469873	3
P13473	153	LAMP2	LAMP2_C153	LAMP2_HUMAN Lysosome-associated membrane glycoprotein 2 OS=Homo sapiens OX=9606 GN=LAMP2 PE=1 SV=2	R	C#NSLSTLEK	C#NSLSTLEK	C#NSLSTLEK	1	1	1	0.0406398	0.0217432	0.181219	3
Q9BZL1	18	UBL5	UBL5_C18	UBL5_HUMAN Ubiquitin-like protein 5 OS=Homo sapiens OX=9606 GN=UBL5 PE=1 SV=1	K	C#NTDDTIGDLKK C#NTDDTIGDLK	C#NTDDTIGDLK C#NTDDTIGDLKK	C#NTDDTIGDLKK C#NTDDTIGDLK	4	3	4	0.0055297	0.0355606	0.00477915	3
P33992	197	MCM5	MCM5_C197	MCM5_HUMAN DNA replication licensing factor MCM5 OS=Homo sapiens OX=9606 GN=MCM5 PE=1 SV=5	K	C#NTDQAGRPK	C#NTDQAGRPK	C#NTDQAGRPK	2	2	2	0.00997705	0.175734	0.0395185	3
O14929	27	HAT1	HAT1_C27	HAT1_HUMAN Histone acetyltransferase type B catalytic subunit OS=Homo sapiens OX=9606 GN=HAT1 PE=1 SV=1	K	C#NTNTAIELK	C#NTNTAIELK	C#NTNTAIELK	2	2	2	0.0109939	0.00488245	0.00191949	3
Q14676	26	MDC1	MDC1_C26	MDC1_HUMAN Mediator of DNA damage checkpoint protein 1 OS=Homo sapiens OX=9606 GN=MDC1 PE=1 SV=3	R	C#NVEPVGR	C#NVEPVGR	C#NVEPVGR	2	1	1	0.186623	0.0562997	0.0255668	3
P05386	61	RPLP1	RPLP1_C61	RLA1_HUMAN 60S acidic ribosomal protein P1 OS=Homo sapiens OX=9606 GN=RPLP1 PE=1 SV=1	I	C#NVGAGGPAPAAGAAPAGGPAPSTAAAPAEEK	C#NVGAGGPAPAAGAAPAGGPAPSTAAAPAEEK	C#NVGAGGPAPAAGAAPAGGPAPSTAAAPAEEK	1	1	1	0.000981771	6.13e-06	5.69e-06	3
Q27J81	1029	INF2	INF2_C1029	INF2_HUMAN Inverted formin-2 OS=Homo sapiens OX=9606 GN=INF2 PE=1 SV=2	R	C#PASEPGLDATTASESR	C#PASEPGLDATTASESR	C#PASEPGLDATTASESR	2	1	1	0.0553413	0.167056	0.0257845	3
P62280	60	RPS11	RPS11_C60	RS11_HUMAN 40S ribosomal protein S11 OS=Homo sapiens OX=9606 GN=RPS11 PE=1 SV=3	K	C#PFTGNVSIR	C#PFTGNVSIR	C#PFTGNVSIR	2	3	4	0.00849697	0.209231	0.074653	3
P30519	265	HMOX2	HMOX2_C265	HMOX2_HUMAN Heme oxygenase 2 OS=Homo sapiens OX=9606 GN=HMOX2 PE=1 SV=2	K	C#PFYAAEQDK	C#PFYAAEQDK	C#PFYAAEQDK	2	3	2	0.0112733	0.00658542	0.00200791	3
Q9Y383	44	LUC7L2	LUC7L2_C44	LC7L2_HUMAN Putative RNA-binding protein Luc7-like 2 OS=Homo sapiens OX=9606 GN=LUC7L2 PE=1 SV=2	C	C#PHDVLSGTR	C#PHDVLSGTR	C#PHDVLSGTR	2	2	2	0.0830985	0.211121	0.0435341	3
P04637	176	TP53	TP53_C176	P53_HUMAN Cellular tumor antigen p53 OS=Homo sapiens OX=9606 GN=TP53 PE=1 SV=4	R	C#PHHER	C#PHHER	C#PHHER	2	2	2	0.177348	0.152099	0.0788768	3
P61978	185	HNRNPK	HNRNPK_C185	HNRPK_HUMAN Heterogeneous nuclear ribonucleoprotein K OS=Homo sapiens OX=9606 GN=HNRNPK PE=1 SV=1	C	C#PHSTDR	C#PHSTDR	C#PHSTDR	3	3	1	0.181304	0.243978	0.179948	3
Q9ULJ6	742	ZMIZ1	ZMIZ1_C742	ZMIZ1_HUMAN Zinc finger MIZ domain-containing protein 1 OS=Homo sapiens OX=9606 GN=ZMIZ1 PE=1 SV=3	K	C#PITFR	C#PITFR	C#PITFR	1	1	1	0.313902	0.360343	0.375772	3
O60341	360	KDM1A	KDM1A_C360	KDM1A_HUMAN Lysine-specific histone demethylase 1A OS=Homo sapiens OX=9606 GN=KDM1A PE=1 SV=2	K	C#PLYEANGQAVPK	C#PLYEANGQAVPK	C#PLYEANGQAVPK	1	1	2	0.0134401	0.00413897	0.144129	3
Q9BTT0	87	ANP32E	ANP32E_C87	AN32E_HUMAN Acidic leucine-rich nuclear phosphoprotein 32 family member E OS=Homo sapiens OX=9606 GN=ANP32E PE=1 SV=1	K	C#PNLTYLNLSGNK	C#PNLTYLNLSGNK	C#PNLTYLNLSGNK	2	3	2	0.113211	0.029889	0.000247	3
P63000	105	RAC1	RAC1_C105	RAC1_HUMAN Ras-related C3 botulinum toxin substrate 1 OS=Homo sapiens OX=9606 GN=RAC1 PE=1 SV=1	H	C#PNTPIILVGTK	C#PNTPIILVGTK	C#PNTPIILVGTK	1	1	1	0.315109	0.108799	0.124659	3
P49327	634	FASN	FASN_C634	FAS_HUMAN Fatty acid synthase OS=Homo sapiens OX=9606 GN=FASN PE=1 SV=3	R	C#PPGVVPACHNSK	C#PPGVVPACHNSK	C#PPGVVPACHNSK	1	1	1	0.0533573	0.0582251	0.0332007	3
Q9H9J2	53	MRPL44	MRPL44_C53	RM44_HUMAN 39S ribosomal protein L44, mitochondrial OS=Homo sapiens OX=9606 GN=MRPL44 PE=1 SV=1	R	C#PPPPVR	C#PPPPVR	C#PPPPVR	3	3	3	0.253639	0.115012	0.0659342	3
Q15021	286	NCAPD2	NCAPD2_C286	CND1_HUMAN Condensin complex subunit 1 OS=Homo sapiens OX=9606 GN=NCAPD2 PE=1 SV=3	K	C#PQELSR	C#PQELSR	C#PQELSR	2	2	2	0.0964973	0.113233	0.0680792	3
Q2TAL8	713	QRICH1	QRICH1_C713	QRIC1_HUMAN Glutamine-rich protein 1 OS=Homo sapiens OX=9606 GN=QRICH1 PE=1 SV=1	K	C#PQSVK	C#PQSVK	C#PQSVK	1	2	1	0.126315	0.0950737	0.0958024	3
Q9BVP2	158	GNL3	GNL3_C158	GNL3_HUMAN Guanine nucleotide-binding protein-like 3 OS=Homo sapiens OX=9606 GN=GNL3 PE=1 SV=2	R	C#PQVEEAIVQSGQK	C#PQVEEAIVQSGQK	C#PQVEEAIVQSGQK	5	4	4	0.00113412	0.00156079	0.000599	3
Q6PKG0	1054	LARP1	LARP1_C1054	LARP1_HUMAN La-related protein 1 OS=Homo sapiens OX=9606 GN=LARP1 PE=1 SV=2	R	C#PSQSSSR	C#PSQSSSR	C#PSQSSSR	1	1	1	0.0924979	0.101137	0.0439033	3
Q969T7	56	NT5C3B	NT5C3B_C56	5NT3B_HUMAN 7-methylguanosine phosphate-specific 5'-nucleotidase OS=Homo sapiens OX=9606 GN=NT5C3B PE=1 SV=4	R	C#PSSYNILDNSK	C#PSSYNILDNSK	C#PSSYNILDNSK	2	1	1	0.22327	0.0185457	0.0206936	3
P46459	11	NSF	NSF_C11	NSF_HUMAN Vesicle-fusing ATPase OS=Homo sapiens OX=9606 GN=NSF PE=1 SV=3	R	C#PTDELSLTNCAVVNEK	C#PTDELSLTNCAVVNEK	C#PTDELSLTNCAVVNEK	3	2	3	0.00132325	0.00512372	0.00282939	3
O95453	169	PARN	PARN_C169	PARN_HUMAN Poly(A)-specific ribonuclease PARN OS=Homo sapiens OX=9606 GN=PARN PE=1 SV=1	K	C#PVTIPEDQK C#PVTIPEDQKK	C#PVTIPEDQKK	C#PVTIPEDQKK	3	3	3	0.0959585	0.352399	0.0920155	3
O43660	338	PLRG1	PLRG1_C338	PLRG1_HUMAN Pleiotropic regulator 1 OS=Homo sapiens OX=9606 GN=PLRG1 PE=1 SV=1	R	C#QAAEPQIITGSHDTTIR	C#QAAEPQIITGSHDTTIR	C#QAAEPQIITGSHDTTIR	1	1	2	0.00127095	0.000445869	0.00141	3
O75616	150	ERAL1	ERAL1_C150	ERAL1_HUMAN GTPase Era, mitochondrial OS=Homo sapiens OX=9606 GN=ERAL1 PE=1 SV=2	R	C#QALGVITEK	C#QALGVITEK	C#QALGVITEK	1	1	1	0.0186062	0.00763567	0.00384745	3
O75431	190	MTX2	MTX2_C190	MTX2_HUMAN Metaxin-2 OS=Homo sapiens OX=9606 GN=MTX2 PE=1 SV=1	C	C#QALSQR	C#QALSQR	C#QALSQR	1	1	1	0.186871	0.232491	0.293776	3
Q9UBC2	470	EPS15L1	EPS15L1_C470	EP15R_HUMAN Epidermal growth factor receptor substrate 15-like 1 OS=Homo sapiens OX=9606 GN=EPS15L1 PE=1 SV=1	K	C#QDETQMISSLK	C#QDETQMISSLK	C#QDETQMISSLK	3	1	1	0.0303986	0.0685959	0.00283205	3
Q9NP92	33	MRPS30	MRPS30_C33	RT30_HUMAN 39S ribosomal protein S30, mitochondrial OS=Homo sapiens OX=9606 GN=MRPS30 PE=1 SV=2	T	C#QDVAATPVAR	C#QDVAATPVAR	C#QDVAATPVAR	1	1	1	0.0575554	0.0418445	0.0262896	3
O43264	404	ZW10	ZW10_C404	ZW10_HUMAN Centromere/kinetochore protein zw10 homolog OS=Homo sapiens OX=9606 GN=ZW10 PE=1 SV=3	K	C#QDVIVAAR	C#QDVIVAAR	C#QDVIVAAR	2	2	2	0.0252038	0.0226163	0.0116804	3
Q9Y2Z0	154	SUGT1	SUGT1_C154	SGT1_HUMAN Protein SGT1 homolog OS=Homo sapiens OX=9606 GN=SUGT1 PE=1 SV=3	R	C#QEAQNGSESEVWTHQSK	C#QEAQNGSESEVWTHQSK	C#QEAQNGSESEVWTHQSK	2	1	1	0.000487344	0.000723953	0.000475167	3
Q93074	444	MED12	MED12_C444	MED12_HUMAN Mediator of RNA polymerase II transcription subunit 12 OS=Homo sapiens OX=9606 GN=MED12 PE=1 SV=4	K	C#QEATAGFTIGR	C#QEATAGFTIGR	C#QEATAGFTIGR	1	1	1	0.255032	0.386405	0.349362	3
Q9BY32	57	ITPA	ITPA_C57	ITPA_HUMAN Inosine triphosphate pyrophosphatase OS=Homo sapiens OX=9606 GN=ITPA PE=1 SV=2	K	C#QEAVR	C#QEAVR	C#QEAVR	1	1	1	0.144486	0.214584	0.165965	3
P52756	766	RBM5	RBM5_C766	RBM5_HUMAN RNA-binding protein 5 OS=Homo sapiens OX=9606 GN=RBM5 PE=1 SV=2	K	C#QGITAPIEAQVR	C#QGITAPIEAQVR	C#QGITAPIEAQVR	1	1	1	0.0556723	0.19157	0.0341202	3
P35579	931	MYH9	MYH9_C931	MYH9_HUMAN Myosin-9 OS=Homo sapiens OX=9606 GN=MYH9 PE=1 SV=4	R	C#QHLQAEK	C#QHLQAEK	C#QHLQAEK	2	2	2	0.03133	0.105414	0.127156	3
P35609	339	ACTN2	ACTN2_C339	ACTN2_HUMAN Alpha-actinin-2 OS=Homo sapiens OX=9606 GN=ACTN2 PE=1 SV=1	K	C#QLEINFNTLQTK	C#QLEINFNTLQTK	C#QLEINFNTLQTK	1	1	2	0.169132	0.0113976	0.000956874	3
O75643	428	SNRNP200	SNRNP200_C428	U520_HUMAN U5 small nuclear ribonucleoprotein 200 kDa helicase OS=Homo sapiens OX=9606 GN=SNRNP200 PE=1 SV=2	R	C#QLPDGSFR	C#QLPDGSFR	C#QLPDGSFR	2	2	2	0.150794	0.0274751	0.0105215	3
Q9H0C8	312	ILKAP	ILKAP_C312	ILKAP_HUMAN Integrin-linked kinase-associated serine/threonine phosphatase 2C OS=Homo sapiens OX=9606 GN=ILKAP PE=1 SV=1	R	C#QLTPNDR	C#QLTPNDR	C#QLTPNDR	1	2	2	0.0316055	0.0946484	0.0978313	3
O94808	603	GFPT2	GFPT2_C603	GFPT2_HUMAN Glutamine--fructose-6-phosphate aminotransferase [isomerizing] 2 OS=Homo sapiens OX=9606 GN=GFPT2 PE=1 SV=3	K	C#QNALQQVTAR	C#QNALQQVTAR	C#QNALQQVTAR	1	2	1	0.0342983	0.128805	0.0230856	3
O60763	678	USO1	USO1_C678	USO1_HUMAN General vesicular transport factor p115 OS=Homo sapiens OX=9606 GN=USO1 PE=1 SV=2	K	C#QNEQLQTAVTQQVSQIQQHK	C#QNEQLQTAVTQQVSQIQQHK	C#QNEQLQTAVTQQVSQIQQHK	1	1	2	0.098988	0.0130405	8.02e-05	3
Q659C4	102	LARP1B	LARP1B_C102	LAR1B_HUMAN La-related protein 1B OS=Homo sapiens OX=9606 GN=LARP1B PE=1 SV=2	R	C#QPEANKPTHNNR	C#QPEANKPTHNNR	C#QPEANKPTHNNR	1	2	2	0.225248	0.212242	0.0015597	3
Q9H6F5	116	CCDC86	CCDC86_C116	CCD86_HUMAN Coiled-coil domain-containing protein 86 OS=Homo sapiens OX=9606 GN=CCDC86 PE=1 SV=1	R	C#QPKPSEEAPK	C#QPKPSEEAPK	C#QPKPSEEAPK	2	2	1	0.0510327	0.133008	0.0890987	3
Q96JB5	136	CDK5RAP3	CDK5RAP3_C136	CK5P3_HUMAN CDK5 regulatory subunit-associated protein 3 OS=Homo sapiens OX=9606 GN=CDK5RAP3 PE=1 SV=2	K	C#QQLQQEYSR	C#QQLQQEYSR	C#QQLQQEYSR	1	1	1	0.191982	0.0937206	0.00230759	3
Q14192	132	FHL2	FHL2_C132	FHL2_HUMAN Four and a half LIM domains protein 2 OS=Homo sapiens OX=9606 GN=FHL2 PE=1 SV=3	R	C#QQPIGTK	C#QQPIGTK	C#QQPIGTK	1	2	1	0.0579657	0.278721	0.0151888	3
Q03252	212	LMNB2	LMNB2_C212	LMNB2_HUMAN Lamin-B2 OS=Homo sapiens OX=9606 GN=LMNB2 PE=1 SV=4	R	C#QSLQEELDFR	C#QSLQEELDFR	C#QSLQEELDFR C#QSLQEELDFRK	1	1	2	0.0245083	0.00275302	0.00324423	3
P20700	198	LMNB1	LMNB1_C198	LMNB1_HUMAN Lamin-B1 OS=Homo sapiens OX=9606 GN=LMNB1 PE=1 SV=2	R	C#QSLTEDLEFR C#QSLTEDLEFRK	C#QSLTEDLEFR	C#QSLTEDLEFR	2	2	3	0.119509	0.0127177	0.0188373	3
Q15910	414	EZH2	EZH2_C414	EZH2_HUMAN Histone-lysine N-methyltransferase EZH2 OS=Homo sapiens OX=9606 GN=EZH2 PE=1 SV=2	R	C#QTPIK	C#QTPIK	C#QTPIK	1	1	1	0.30415	0.0734829	0.106561	3
Q9UEW8	99	STK39	STK39_C99	STK39_HUMAN STE20/SPS1-related proline-alanine-rich protein kinase OS=Homo sapiens OX=9606 GN=STK39 PE=1 SV=3	K	C#QTSMDELLK	C#QTSMDELLK	C#QTSMDELLK	3	2	3	0.0305744	0.0103207	0.00466589	3
Q99832	345	CCT7	CCT7_C345	TCPH_HUMAN T-complex protein 1 subunit eta OS=Homo sapiens OX=9606 GN=CCT7 PE=1 SV=2	R	C#QVFEETQIGGER	C#QVFEETQIGGER	C#QVFEETQIGGER	3	4	3	0.00472557	0.00521794	0.00193	3
Q99832	29	CCT7	CCT7_C29	TCPH_HUMAN T-complex protein 1 subunit eta OS=Homo sapiens OX=9606 GN=CCT7 PE=1 SV=2	A	C#QVIAEAVR	C#QVIAEAVR	C#QVIAEAVR	1	1	1	0.14459	0.0281444	0.257648	3
Q8ND82	94	ZNF280C	ZNF280C_C94	Z280C_HUMAN Zinc finger protein 280C OS=Homo sapiens OX=9606 GN=ZNF280C PE=1 SV=1	R	C#RDPPSNPVAASPR	C#RDPPSNPVAASPR	C#RDPPSNPVAASPR	3	4	2	0.00462198	0.0144909	0.074231	3
P49792	2696	RANBP2	RANBP2_C2696	RBP2_HUMAN E3 SUMO-protein ligase RanBP2 OS=Homo sapiens OX=9606 GN=RANBP2 PE=1 SV=2	K	C#RPLEENTADNEK	C#RPLEENTADNEK	C#RPLEENTADNEK	3	1	1	0.00227502	0.0640667	0.00449457	3
P31943	22	HNRNPH1	HNRNPH1_C22	HNRH1_HUMAN Heterogeneous nuclear ribonucleoprotein H OS=Homo sapiens OX=9606 GN=HNRNPH1 PE=1 SV=4	S	C#SADEVQR	C#SADEVQR	C#SADEVQR	1	1	1	0.0849956	0.0862632	0.0944596	3
Q8WZA9	373	IRGQ	IRGQ_C373	IRGQ_HUMAN Immunity-related GTPase family Q protein OS=Homo sapiens OX=9606 GN=IRGQ PE=1 SV=1	K	C#SAGSQK	C#SAGSQK	C#SAGSQK	1	1	1	0.280174	0.17336	0.0974091	3
P63220	17	RPS21	RPS21_C17	RS21_HUMAN 40S ribosomal protein S21 OS=Homo sapiens OX=9606 GN=RPS21 PE=1 SV=1	K	C#SASNR	C#SASNR	C#SASNR	1	2	1	0.324318	0.346849	0.273371	3
P46013	824	MKI67	MKI67_C824	KI67_HUMAN Proliferation marker protein Ki-67 OS=Homo sapiens OX=9606 GN=MKI67 PE=1 SV=2	K	C#SASPPLR	C#SASPPLR	C#SASPPLR	2	2	2	0.306887	0.207953	0.190399	3
Q96HA7	762	TONSL	TONSL_C762	TONSL_HUMAN Tonsoku-like protein OS=Homo sapiens OX=9606 GN=TONSL PE=1 SV=2	R	C#SATAQR	C#SATAQR	C#SATAQR	1	1	1	0.249905	0.27209	0.217003	3
P50213	351	IDH3A	IDH3A_C351	IDH3A_HUMAN Isocitrate dehydrogenase [NAD] subunit alpha, mitochondrial OS=Homo sapiens OX=9606 GN=IDH3A PE=1 SV=1	K	C#SDFTEEICR	C#SDFTEEICR	C#SDFTEEICR	1	2	1	0.0532221	0.044066	0.0182296	3
Q8WUM4	691	PDCD6IP	PDCD6IP_C691	PDC6I_HUMAN Programmed cell death 6-interacting protein OS=Homo sapiens OX=9606 GN=PDCD6IP PE=1 SV=1	K	C#SDIVFAR	C#SDIVFAR	C#SDIVFAR	2	2	1	0.157388	0.129441	0.0636548	3
Q9Y2U8	814	LEMD3	LEMD3_C814	MAN1_HUMAN Inner nuclear membrane protein Man1 OS=Homo sapiens OX=9606 GN=LEMD3 PE=1 SV=2	K	C#SDNDGIVHIAVDK	C#SDNDGIVHIAVDK	C#SDNDGIVHIAVDK	2	2	1	0.00129186	0.0214404	0.137919	3
P04637	182	TP53	TP53_C182	P53_HUMAN Cellular tumor antigen p53 OS=Homo sapiens OX=9606 GN=TP53 PE=1 SV=4	R	C#SDSDGLAPPQHLIR	C#SDSDGLAPPQHLIR	C#SDSDGLAPPQHLIR	6	4	3	0.00220994	0.00318124	0.000582	3
Q9NYP9	25	MIS18A	MIS18A_C25	MS18A_HUMAN Protein Mis18-alpha OS=Homo sapiens OX=9606 GN=MIS18A PE=1 SV=1	K	C#SDSSLLGK	C#SDSSLLGK	C#SDSSLLGK	1	1	1	0.223784	0.17493	0.0249905	3
P23246	431	SFPQ	SFPQ_C431	SFPQ_HUMAN Splicing factor, proline- and glutamine-rich OS=Homo sapiens OX=9606 GN=SFPQ PE=1 SV=2	R	C#SEGVFLLTTTPR	C#SEGVFLLTTTPR	C#SEGVFLLTTTPR	1	4	5	0.0532867	0.00728084	0.00296062	3
O14654	1065	IRS4	IRS4_C1065	IRS4_HUMAN Insulin receptor substrate 4 OS=Homo sapiens OX=9606 GN=IRS4 PE=1 SV=1	R	C#SEPPPVAR	C#SEPPPVAR	C#SEPPPVAR	2	3	4	0.0107592	0.00813291	0.0154924	3
P09874	24	PARP1	PARP1_C24	PARP1_HUMAN Poly [ADP-ribose] polymerase 1 OS=Homo sapiens OX=9606 GN=PARP1 PE=1 SV=4	K	C#SESIPK	C#SESIPK	C#SESIPK	1	2	1	0.202909	0.277083	0.0571364	3
Q9Y678	169	COPG1	COPG1_C169	COPG1_HUMAN Coatomer subunit gamma-1 OS=Homo sapiens OX=9606 GN=COPG1 PE=1 SV=1	K	C#SFDVVK	C#SFDVVK	C#SFDVVK	1	1	1	0.0439482	0.12015	0.0463405	3
P14618	424	PKM	PKM_C424	KPYM_HUMAN Pyruvate kinase PKM OS=Homo sapiens OX=9606 GN=PKM PE=1 SV=4	C	C#SGAIIVLTK	C#SGAIIVLTK	C#SGAIIVLTK	1	2	1	0.0671002	0.0749472	0.0118095	3
O15355	13	PPM1G	PPM1G_C13	PPM1G_HUMAN Protein phosphatase 1G OS=Homo sapiens OX=9606 GN=PPM1G PE=1 SV=1	K	C#SGDGVGAPR	C#SGDGVGAPR	C#SGDGVGAPR	2	2	2	0.0402283	0.0144628	0.00715718	3
P50851	2675	LRBA	LRBA_C2675	LRBA_HUMAN Lipopolysaccharide-responsive and beige-like anchor protein OS=Homo sapiens OX=9606 GN=LRBA PE=1 SV=4	K	C#SGIGDNPGSETAAPR	C#SGIGDNPGSETAAPR	C#SGIGDNPGSETAAPR	1	1	1	0.00689363	0.0419039	0.0688808	3
P15170	261	GSPT1	GSPT1_C261	ERF3A_HUMAN Eukaryotic peptide chain release factor GTP-binding subunit ERF3A OS=Homo sapiens OX=9606 GN=GSPT1 PE=1 SV=1	P	C#SGLTGANIK	C#SGLTGANIK	C#SGLTGANIK	1	2	1	0.0279006	0.156386	0.318135	3
Q96SN8	1528	CDK5RAP2	CDK5RAP2_C1528	CK5P2_HUMAN CDK5 regulatory subunit-associated protein 2 OS=Homo sapiens OX=9606 GN=CDK5RAP2 PE=1 SV=5	R	C#SGQELSR	C#SGQELSR	C#SGQELSR	1	1	1	0.0535202	0.118125	0.0558529	3
Q9Y277	36	VDAC3	VDAC3_C36	VDAC3_HUMAN Voltage-dependent anion-selective channel protein 3 OS=Homo sapiens OX=9606 GN=VDAC3 PE=1 SV=1	S	C#SGVEFSTSGHAYTDTGK	C#SGVEFSTSGHAYTDTGK	C#SGVEFSTSGHAYTDTGK	3	3	2	0.00100076	0.000932	0.000349	3
Q13526	57	PIN1	PIN1_C57	PIN1_HUMAN Peptidyl-prolyl cis-trans isomerase NIMA-interacting 1 OS=Homo sapiens OX=9606 GN=PIN1 PE=1 SV=1	R	C#SHLLVK	C#SHLLVK	C#SHLLVK	2	3	3	0.148893	0.0962373	0.0277154	3
Q16637	289	SMN1	SMN1_C289	SMN_HUMAN Survival motor neuron protein OS=Homo sapiens OX=9606 GN=SMN1 PE=1 SV=1	R	C#SHSLN	C#SHSLN	C#SHSLN	1	1	1	0.266092	0.224043	0.236479	3
P27816	635	MAP4	MAP4_C635	MAP4_HUMAN Microtubule-associated protein 4 OS=Homo sapiens OX=9606 GN=MAP4 PE=1 SV=3	K	C#SLPAEEDSVLEK	C#SLPAEEDSVLEK	C#SLPAEEDSVLEK	1	1	2	0.0761306	0.0578343	0.00453147	3
Q9NQ88	215	TIGAR	TIGAR_C215	TIGAR_HUMAN Fructose-2,6-bisphosphatase TIGAR OS=Homo sapiens OX=9606 GN=TIGAR PE=1 SV=1	K	C#SLPATLSR	C#SLPATLSR	C#SLPATLSR	1	1	1	0.0296084	0.0595176	0.116856	3
Q9UHB9	525	SRP68	SRP68_C525	SRP68_HUMAN Signal recognition particle subunit SRP68 OS=Homo sapiens OX=9606 GN=SRP68 PE=1 SV=2	K	C#SLQAAAILDANDAHQTETSSSQVK	C#SLQAAAILDANDAHQTETSSSQVK	C#SLQAAAILDANDAHQTETSSSQVK	2	2	3	0.0227772	0.00859356	0.000475352	3
Q9UHR5	127	SAP30BP	SAP30BP_C127	S30BP_HUMAN SAP30-binding protein OS=Homo sapiens OX=9606 GN=SAP30BP PE=1 SV=1	R	C#SNHLQDK	C#SNHLQDK	C#SNHLQDK	1	1	1	0.10429	0.298792	0.00158275	3
P17812	218	CTPS1	CTPS1_C218	PYRG1_HUMAN CTP synthase 1 OS=Homo sapiens OX=9606 GN=CTPS1 PE=1 SV=2	R	C#SNPLDTSVK	C#SNPLDTSVK	C#SNPLDTSVK	2	2	2	0.000979207	0.00069948	0.000382521	3
P33992	397	MCM5	MCM5_C397	MCM5_HUMAN DNA replication licensing factor MCM5 OS=Homo sapiens OX=9606 GN=MCM5 PE=1 SV=5	K	C#SPIGVYTSGK	C#SPIGVYTSGK	C#SPIGVYTSGK	2	2	3	0.0198627	0.00535841	0.0151461	3
Q9H6F5	127	CCDC86	CCDC86_C127	CCD86_HUMAN Coiled-coil domain-containing protein 86 OS=Homo sapiens OX=9606 GN=CCDC86 PE=1 SV=1	K	C#SQDQGVLASELAQNK	C#SQDQGVLASELAQNK	C#SQDQGVLASELAQNK	1	1	2	0.011018	0.00619733	0.00146467	3
Q14258	157	TRIM25	TRIM25_C157	TRI25_HUMAN E3 ubiquitin/ISG15 ligase TRIM25 OS=Homo sapiens OX=9606 GN=TRIM25 PE=1 SV=2	K	C#SQHNR	C#SQHNR	C#SQHNR	2	1	1	0.188792	0.229353	0.0839938	3
Q13613	305	MTMR1	MTMR1_C305	MTMR1_HUMAN Myotubularin-related protein 1 OS=Homo sapiens OX=9606 GN=MTMR1 PE=1 SV=4	R	C#SQPLVGPNDKR C#SQPLVGPNDK	C#SQPLVGPNDK C#SQPLVGPNDKR	C#SQPLVGPNDKR	2	2	1	0.109122	0.21305	0.0328536	3
Q9UJC3	432	HOOK1	HOOK1_C432	HOOK1_HUMAN Protein Hook homolog 1 OS=Homo sapiens OX=9606 GN=HOOK1 PE=1 SV=2	R	C#SQVQQDHLNQTDASATK	C#SQVQQDHLNQTDASATK	C#SQVQQDHLNQTDASATK	2	1	2	0.000173195	0.000193754	4.25e-05	3
P36551	127	CPOX	CPOX_C127	HEM6_HUMAN Oxygen-dependent coproporphyrinogen-III oxidase, mitochondrial OS=Homo sapiens OX=9606 GN=CPOX PE=1 SV=3	R	C#SSFMAPPVTDLGELR	C#SSFMAPPVTDLGELR	C#SSFMAPPVTDLGELR	2	2	2	0.0110992	0.00340959	0.00309403	3
P05023	518	ATP1A1	ATP1A1_C518	AT1A1_HUMAN Sodium/potassium-transporting ATPase subunit alpha-1 OS=Homo sapiens OX=9606 GN=ATP1A1 PE=1 SV=1	R	C#SSILLHGK	C#SSILLHGK	C#SSILLHGK	1	1	1	0.0256734	0.00746735	0.00657248	3
Q99873	119	PRMT1	PRMT1_C119	ANM1_HUMAN Protein arginine N-methyltransferase 1 OS=Homo sapiens OX=9606 GN=PRMT1 PE=1 SV=3	E	C#SSISDYAVK	C#SSISDYAVK	C#SSISDYAVK	1	1	1	0.0525644	0.0225406	0.199662	3
Q8TEU7	1293	RAPGEF6	RAPGEF6_C1293	RPGF6_HUMAN Rap guanine nucleotide exchange factor 6 OS=Homo sapiens OX=9606 GN=RAPGEF6 PE=1 SV=2	R	C#SSQALAVPESTGALEK	C#SSQALAVPESTGALEK	C#SSQALAVPESTGALEK	1	1	1	0.00185875	0.0126616	0.00308234	3
Q9UJF2	415	RASAL2	RASAL2_C415	NGAP_HUMAN Ras GTPase-activating protein nGAP OS=Homo sapiens OX=9606 GN=RASAL2 PE=1 SV=2	K	C#SSSELIDHQSNLK	C#SSSELIDHQSNLK	C#SSSELIDHQSNLK	1	1	1	0.17494	0.217927	0.0176677	3
Q15058	610	KIF14	KIF14_C610	KIF14_HUMAN Kinesin-like protein KIF14 OS=Homo sapiens OX=9606 GN=KIF14 PE=1 SV=1	R	C#STAHTNGDR	C#STAHTNGDR	C#STAHTNGDR	1	1	2	0.167822	0.161646	0.160411	3
Q9BW19	95	KIFC1	KIFC1_C95	KIFC1_HUMAN Kinesin-like protein KIFC1 OS=Homo sapiens OX=9606 GN=KIFC1 PE=1 SV=2	R	C#STAIATGLK	C#STAIATGLK	C#STAIATGLK	1	1	1	0.0228846	0.0220195	0.00539636	3
Q8TDD1	389	DDX54	DDX54_C389	DDX54_HUMAN ATP-dependent RNA helicase DDX54 OS=Homo sapiens OX=9606 GN=DDX54 PE=1 SV=2	K	C#STLIVTDLAAR	C#STLIVTDLAAR	C#STLIVTDLAAR	1	2	2	0.00250045	0.166858	0.107802	3
P60981	23	DSTN	DSTN_C23	DEST_HUMAN Destrin OS=Homo sapiens OX=9606 GN=DSTN PE=1 SV=3	K	C#STPEEIKK C#STPEEIK	C#STPEEIK C#STPEEIKK	C#STPEEIK C#STPEEIKK	4	3	5	0.0652906	0.236544	0.0863917	3
P25205	446	MCM3	MCM3_C446	MCM3_HUMAN DNA replication licensing factor MCM3 OS=Homo sapiens OX=9606 GN=MCM3 PE=1 SV=3	R	C#SVLAAANPVYGR	C#SVLAAANPVYGR	C#SVLAAANPVYGR	1	2	3	0.00510595	0.0195799	0.025612	3
Q5JRX3	780	PITRM1	PITRM1_C780	PREP_HUMAN Presequence protease, mitochondrial OS=Homo sapiens OX=9606 GN=PITRM1 PE=1 SV=3	R	C#SVNATPQQMPQTEK	C#SVNATPQQMPQTEK	C#SVNATPQQMPQTEK	2	2	2	0.00737123	0.052088	0.0680258	3
Q96RQ3	600	MCCC1	MCCC1_C600	MCCA_HUMAN Methylcrotonoyl-CoA carboxylase subunit alpha, mitochondrial OS=Homo sapiens OX=9606 GN=MCCC1 PE=1 SV=3	K	C#SVNGVASK	C#SVNGVASK	C#SVNGVASK	1	1	2	0.053029	0.0852674	0.214001	3
Q9NVN8	213	GNL3L	GNL3L_C213	GNL3L_HUMAN Guanine nucleotide-binding protein-like 3-like protein OS=Homo sapiens OX=9606 GN=GNL3L PE=1 SV=1	R	C#SVPVDQASESLLK	C#SVPVDQASESLLK	C#SVPVDQASESLLK	2	1	3	0.0507867	0.000921119	0.0343712	3
Q13330	126	MTA1	MTA1_C126	MTA1_HUMAN Metastasis-associated protein MTA1 OS=Homo sapiens OX=9606 GN=MTA1 PE=1 SV=2	K	C#SVTLLNETESLK	C#SVTLLNETESLK	C#SVTLLNETESLK	1	1	1	0.217772	0.00973245	0.0129972	3
Q13247	121	SRSF6	SRSF6_C121	SRSF6_HUMAN Serine/arginine-rich splicing factor 6 OS=Homo sapiens OX=9606 GN=SRSF6 PE=1 SV=2	R	C#SWQDLK	C#SWQDLK	C#SWQDLK	2	3	3	0.159809	0.108603	0.0347959	3
Q8NI27	931	THOC2	THOC2_C931	THOC2_HUMAN THO complex subunit 2 OS=Homo sapiens OX=9606 GN=THOC2 PE=1 SV=2	R	C#TALQDK	C#TALQDK	C#TALQDK	1	1	1	0.0715819	0.118741	0.0324464	3
P49916	404	LIG3	LIG3_C404	DNLI3_HUMAN DNA ligase 3 OS=Homo sapiens OX=9606 GN=LIG3 PE=1 SV=2	R	C#TANDLK	C#TANDLK	C#TANDLK	1	1	1	0.0413466	0.149514	0.030799	3
P17980	387	PSMC3	PSMC3_C387	PRS6A_HUMAN 26S proteasome regulatory subunit 6A OS=Homo sapiens OX=9606 GN=PSMC3 PE=1 SV=3	R	C#TDDFNGAQCK	C#TDDFNGAQCK	C#TDDFNGAQCK	1	1	1	0.00143678	0.00956181	0.000594836	3
O00410	944	IPO5	IPO5_C944	IPO5_HUMAN Importin-5 OS=Homo sapiens OX=9606 GN=IPO5 PE=1 SV=4	F	C#TEALPLLVR	C#TEALPLLVR	C#TEALPLLVR	1	1	1	0.0602614	0.132668	0.0258541	3
P30050	17	RPL12	RPL12_C17	RL12_HUMAN 60S ribosomal protein L12 OS=Homo sapiens OX=9606 GN=RPL12 PE=1 SV=1	R	C#TGGEVGATSALAPK	C#TGGEVGATSALAPK	C#TGGEVGATSALAPK	7	6	14	0.00177941	0.000332712	0.000413	3
Q96EE3	315	SEH1L	SEH1L_C315	SEH1_HUMAN Nucleoporin SEH1 OS=Homo sapiens OX=9606 GN=SEH1L PE=1 SV=3	K	C#TGILK	C#TGILK	C#TGILK	1	1	1	0.374959	0.192102	0.164847	3
P11586	785	MTHFD1	MTHFD1_C785	C1TC_HUMAN C-1-tetrahydrofolate synthase, cytoplasmic OS=Homo sapiens OX=9606 GN=MTHFD1 PE=1 SV=3	K	C#THWAEGGK	C#THWAEGGK	C#THWAEGGK	2	2	3	0.0344071	0.0464826	0.0247956	3
P60059	25	SEC61G	SEC61G_C25	SC61G_HUMAN Protein transport protein Sec61 subunit gamma OS=Homo sapiens OX=9606 GN=SEC61G PE=1 SV=1	R	C#TKPDR C#TKPDRK	C#TKPDR	C#TKPDR C#TKPDRK	2	1	2	0.2415	0.183955	0.185208	3
O75643	331	SNRNP200	SNRNP200_C331	U520_HUMAN U5 small nuclear ribonucleoprotein 200 kDa helicase OS=Homo sapiens OX=9606 GN=SNRNP200 PE=1 SV=2	Y	C#TLLASAQSEAEK	C#TLLASAQSEAEK	C#TLLASAQSEAEK	1	1	1	0.0178753	0.000474061	0.0110446	3
P34932	34	HSPA4	HSPA4_C34	HSP74_HUMAN Heat shock 70 kDa protein 4 OS=Homo sapiens OX=9606 GN=HSPA4 PE=1 SV=4	R	C#TPACISFGPK	C#TPACISFGPK	C#TPACISFGPK	2	2	3	0.249256	0.0990159	0.0918552	3
O60231	37	DHX16	DHX16_C37	DHX16_HUMAN Pre-mRNA-splicing factor ATP-dependent RNA helicase DHX16 OS=Homo sapiens OX=9606 GN=DHX16 PE=1 SV=2	R	C#TSAEEFVQR	C#TSAEEFVQR	C#TSAEEFVQR	2	2	2	0.0544702	0.0966393	0.0105285	3
P51114	129	FXR1	FXR1_C129	FXR1_HUMAN Fragile X mental retardation syndrome-related protein 1 OS=Homo sapiens OX=9606 GN=FXR1 PE=1 SV=3	K	C#TVDVPEDLR	C#TVDVPEDLR	C#TVDVPEDLR	2	2	2	0.0278222	0.0656362	0.0477425	3
P49327	1828	FASN	FASN_C1828	FAS_HUMAN Fatty acid synthase OS=Homo sapiens OX=9606 GN=FASN PE=1 SV=3	K	C#TVFHGAQVEDAFR	C#TVFHGAQVEDAFR	C#TVFHGAQVEDAFR	1	6	3	0.180911	0.00331687	0.00489	3
P49736	624	MCM2	MCM2_C624	MCM2_HUMAN DNA replication licensing factor MCM2 OS=Homo sapiens OX=9606 GN=MCM2 PE=1 SV=4	R	C#TVIAAANPIGGR	C#TVIAAANPIGGR	C#TVIAAANPIGGR	1	2	2	0.00690185	0.010413	0.00323	3
O94832	977	MYO1D	MYO1D_C977	MYO1D_HUMAN Unconventional myosin-Id OS=Homo sapiens OX=9606 GN=MYO1D PE=1 SV=2	K	C#TVSVETR	C#TVSVETR	C#TVSVETR	1	1	1	0.376727	0.129146	0.35333	3
P78527	1335	PRKDC	PRKDC_C1335	PRKDC_HUMAN DNA-dependent protein kinase catalytic subunit OS=Homo sapiens OX=9606 GN=PRKDC PE=1 SV=3	K	C#TVVVR	C#TVVVR	C#TVVVR	1	1	2	0.24179	0.334075	0.139924	3
Q92841	319	DDX17	DDX17_C319	DDX17_HUMAN Probable ATP-dependent RNA helicase DDX17 OS=Homo sapiens OX=9606 GN=DDX17 PE=1 SV=2	R	C#TYLVLDEADR	C#TYLVLDEADR	C#TYLVLDEADR	1	2	2	0.00246863	0.0896356	0.000919692	3
P42704	930	LRPPRC	LRPPRC_C930	LPPRC_HUMAN Leucine-rich PPR motif-containing protein, mitochondrial OS=Homo sapiens OX=9606 GN=LRPPRC PE=1 SV=3	R	C#VANNQVETLEK	C#VANNQVETLEK	C#VANNQVETLEK	4	1	2	0.0319403	0.00376783	0.00197404	3
O00231	289	PSMD11	PSMD11_C289	PSD11_HUMAN 26S proteasome non-ATPase regulatory subunit 11 OS=Homo sapiens OX=9606 GN=PSMD11 PE=1 SV=3	K	C#VAQASK	C#VAQASK	C#VAQASK	1	1	1	0.0481068	0.0405903	0.0363592	3
Q9BTW9	905	TBCD	TBCD_C905	TBCD_HUMAN Tubulin-specific chaperone D OS=Homo sapiens OX=9606 GN=TBCD PE=1 SV=2	C	C#VAQQASEK	C#VAQQASEK	C#VAQQASEK	1	1	1	0.0420273	0.0122965	0.225154	3
Q969X6	21	UTP4	UTP4_C21	UTP4_HUMAN U3 small nucleolar RNA-associated protein 4 homolog OS=Homo sapiens OX=9606 GN=UTP4 PE=1 SV=1	R	C#VAYNNQSNR	C#VAYNNQSNR	C#VAYNNQSNR	1	1	1	0.252897	0.155892	0.107854	3
Q15185	20	PTGES3	PTGES3_C20	TEBP_HUMAN Prostaglandin E synthase 3 OS=Homo sapiens OX=9606 GN=PTGES3 PE=1 SV=1	F	C#VEDSKDVNVNFEK	C#VEDSKDVNVNFEK	C#VEDSKDVNVNFEK	2	1	1	0.00716326	0.00672036	0.0672525	3
O00139	406	KIF2A	KIF2A_C406	KIF2A_HUMAN Kinesin-like protein KIF2A OS=Homo sapiens OX=9606 GN=KIF2A PE=1 SV=3	K	C#VEDVLK	C#VEDVLK	C#VEDVLK	2	2	1	0.130561	0.135165	0.0853891	3
Q15758	363	SLC1A5	SLC1A5_C363	AAAT_HUMAN Neutral amino acid transporter B(0) OS=Homo sapiens OX=9606 GN=SLC1A5 PE=1 SV=2	K	C#VEENNGVAK	C#VEENNGVAK	C#VEENNGVAK	1	1	1	0.00443232	0.00640252	0.0179821	3
Q13547	284	HDAC1	HDAC1_C284	HDAC1_HUMAN Histone deacetylase 1 OS=Homo sapiens OX=9606 GN=HDAC1 PE=1 SV=1	K	C#VEFVK	C#VEFVK	C#VEFVK	1	1	2	0.129995	0.36453	0.237505	3
O00429	431	DNM1L	DNM1L_C431	DNM1L_HUMAN Dynamin-1-like protein OS=Homo sapiens OX=9606 GN=DNM1L PE=1 SV=2	R	C#VELVHEEMQR	C#VELVHEEMQR	C#VELVHEEMQR	1	1	3	0.0183143	0.0113747	0.00176119	3
P68104	411	EEF1A1	EEF1A1_C411	EF1A1_HUMAN Elongation factor 1-alpha 1 OS=Homo sapiens OX=9606 GN=EEF1A1 PE=1 SV=1	M	C#VESFSDYPPLGR	C#VESFSDYPPLGR	C#VESFSDYPPLGR	6	9	11	0.0147395	0.0101802	0.00953618	3
Q15024	34	EXOSC7	EXOSC7_C34	EXOS7_HUMAN Exosome complex component RRP42 OS=Homo sapiens OX=9606 GN=EXOSC7 PE=1 SV=3	R	C#VEVETDVVSNTSGSAR	C#VEVETDVVSNTSGSAR	C#VEVETDVVSNTSGSAR	3	4	2	0.000531524	0.00220124	0.000163718	3
Q9P0L0	128	VAPA	VAPA_C128	VAPA_HUMAN Vesicle-associated membrane protein-associated protein A OS=Homo sapiens OX=9606 GN=VAPA PE=1 SV=3	R	C#VFEMPNENDKLNDMEPSK C#VFEMPNENDK	C#VFEMPNENDKLNDMEPSK C#VFEMPNENDK	C#VFEMPNENDK C#VFEMPNENDKLNDMEPSK	4	3	5	0.100334	0.18486	0.0874058	3
Q69YN2	160	CWF19L1	CWF19L1_C160	C19L1_HUMAN CWF19-like protein 1 OS=Homo sapiens OX=9606 GN=CWF19L1 PE=1 SV=2	K	C#VGNFGNSSGEVDTKK C#VGNFGNSSGEVDTK	C#VGNFGNSSGEVDTK C#VGNFGNSSGEVDTKK	C#VGNFGNSSGEVDTK C#VGNFGNSSGEVDTKK	2	2	2	0.0225191	0.0795587	0.0343745	3
P83436	174	COG7	COG7_C174	COG7_HUMAN Conserved oligomeric Golgi complex subunit 7 OS=Homo sapiens OX=9606 GN=COG7 PE=1 SV=1	K	C#VHLEALK	C#VHLEALK	C#VHLEALK	2	1	2	0.12762	0.0373197	0.0224034	3
Q96I25	339	RBM17	RBM17_C339	SPF45_HUMAN Splicing factor 45 OS=Homo sapiens OX=9606 GN=RBM17 PE=1 SV=1	K	C#VIFEIPGAPDDEAVR	C#VIFEIPGAPDDEAVR	C#VIFEIPGAPDDEAVR	1	2	2	0.0440753	0.0430522	0.0453694	3
P61619	13	SEC61A1	SEC61A1_C13	S61A1_HUMAN Protein transport protein Sec61 subunit alpha isoform 1 OS=Homo sapiens OX=9606 GN=SEC61A1 PE=1 SV=2	F	C#VILPEIQKPER	C#VILPEIQKPER	C#VILPEIQKPER	3	3	5	0.0498742	0.0209796	0.0306424	3
P49327	1471	FASN	FASN_C1471	FAS_HUMAN Fatty acid synthase OS=Homo sapiens OX=9606 GN=FASN PE=1 SV=3	R	C#VLLSNLSSTSHVPEVDPGSAELQK	C#VLLSNLSSTSHVPEVDPGSAELQK	C#VLLSNLSSTSHVPEVDPGSAELQK	1	1	3	0.00937676	0.00062544	0.000833	3
P31689	302	DNAJA1	DNAJA1_C302	DNJA1_HUMAN DnaJ homolog subfamily A member 1 OS=Homo sapiens OX=9606 GN=DNAJA1 PE=1 SV=2	K	C#VLNEGMPIYR	C#VLNEGMPIYR	C#VLNEGMPIYR	3	4	5	0.0149455	0.0345551	0.017688	3
Q9Y3F4	305	STRAP	STRAP_C305	STRAP_HUMAN Serine-threonine kinase receptor-associated protein OS=Homo sapiens OX=9606 GN=STRAP PE=1 SV=1	K	C#VLPEEDSGELAKPK	C#VLPEEDSGELAKPK	C#VLPEEDSGELAKPK C#VLPEEDSGELAK	4	3	5	0.00160498	0.00185	0.00146105	3
Q9BQ52	136	ELAC2	ELAC2_C136	RNZ2_HUMAN Zinc phosphodiesterase ELAC protein 2 OS=Homo sapiens OX=9606 GN=ELAC2 PE=1 SV=2	K	C#VLSGPPQLEK	C#VLSGPPQLEK	C#VLSGPPQLEK	2	2	2	0.0195878	0.0403341	0.109386	3
O43395	630	PRPF3	PRPF3_C630	PRPF3_HUMAN U4/U6 small nuclear ribonucleoprotein Prp3 OS=Homo sapiens OX=9606 GN=PRPF3 PE=1 SV=2	K	C#VLVWEGTAK	C#VLVWEGTAK	C#VLVWEGTAK	1	1	1	0.298026	0.00773596	0.0358159	3
O75663	75	TIPRL	TIPRL_C75	TIPRL_HUMAN TIP41-like protein OS=Homo sapiens OX=9606 GN=TIPRL PE=1 SV=2	R	C#VNNYQGMLK	C#VNNYQGMLK	C#VNNYQGMLK	1	2	2	0.124024	0.159592	0.0188582	3
Q01518	356	CAP1	CAP1_C356	CAP1_HUMAN Adenylyl cyclase-associated protein 1 OS=Homo sapiens OX=9606 GN=CAP1 PE=1 SV=5	K	C#VNTTLQIK	C#VNTTLQIK	C#VNTTLQIK	1	1	1	0.332541	0.021353	0.00950243	3
Q6L8Q7	42	PDE12	PDE12_C42	PDE12_HUMAN 2',5'-phosphodiesterase 12 OS=Homo sapiens OX=9606 GN=PDE12 PE=1 SV=2	R	C#VPSEPK	C#VPSEPK	C#VPSEPK	1	2	2	0.0941973	0.145165	0.169826	3
Q8N1F7	569	NUP93	NUP93_C569	NUP93_HUMAN Nuclear pore complex protein Nup93 OS=Homo sapiens OX=9606 GN=NUP93 PE=1 SV=2	R	C#VSELVIESR	C#VSELVIESR	C#VSELVIESR	1	1	1	0.0346809	0.0435912	0.0280379	3
Q9H3U1	118	UNC45A	UNC45A_C118	UN45A_HUMAN Protein unc-45 homolog A OS=Homo sapiens OX=9606 GN=UNC45A PE=1 SV=1	R	C#VSLEPK	C#VSLEPK	C#VSLEPK	1	1	1	0.127533	0.382446	0.149575	3
P18583	92	SON	SON_C92	SON_HUMAN Protein SON OS=Homo sapiens OX=9606 GN=SON PE=1 SV=4	R	C#VSVQTDPTDEIPTKK C#VSVQTDPTDEIPTK	C#VSVQTDPTDEIPTKK C#VSVQTDPTDEIPTK	C#VSVQTDPTDEIPTKK C#VSVQTDPTDEIPTK	4	3	3	0.0161574	0.0344144	0.00690994	3
P11310	159	ACADM	ACADM_C159	ACADM_HUMAN Medium-chain specific acyl-CoA dehydrogenase, mitochondrial OS=Homo sapiens OX=9606 GN=ACADM PE=1 SV=1	Y	C#VTEPGAGSDVAGIK	C#VTEPGAGSDVAGIK	C#VTEPGAGSDVAGIK	1	1	1	0.192412	0.0498913	0.210985	3
O75694	651	NUP155	NUP155_C651	NU155_HUMAN Nuclear pore complex protein Nup155 OS=Homo sapiens OX=9606 GN=NUP155 PE=1 SV=1	S	C#VTGPEIVYSGK	C#VTGPEIVYSGK	C#VTGPEIVYSGK	1	1	1	0.288043	0.187811	0.187145	3
Q14671	1085	PUM1	PUM1_C1085	PUM1_HUMAN Pumilio homolog 1 OS=Homo sapiens OX=9606 GN=PUM1 PE=1 SV=3	K	C#VTHASR	C#VTHASR	C#VTHASR	1	1	1	0.149579	0.0698354	0.20011	3
P42704	380	LRPPRC	LRPPRC_C380	LPPRC_HUMAN Leucine-rich PPR motif-containing protein, mitochondrial OS=Homo sapiens OX=9606 GN=LRPPRC PE=1 SV=3	H	C#VTMNTPVEK	C#VTMNTPVEK	C#VTMNTPVEK	2	2	2	0.0626395	0.035145	0.0245778	3
P17987	218	TCP1	TCP1_C218	TCPA_HUMAN T-complex protein 1 subunit alpha OS=Homo sapiens OX=9606 GN=TCP1 PE=1 SV=1	N	C#VVGSQGMPK	C#VVGSQGMPK	C#VVGSQGMPK	1	2	1	0.148408	0.106509	0.0120578	3
Q14690	151	PDCD11	PDCD11_C151	RRP5_HUMAN Protein RRP5 homolog OS=Homo sapiens OX=9606 GN=PDCD11 PE=1 SV=3	R	C#VVSSLGITDR	C#VVSSLGITDR	C#VVSSLGITDR	1	2	2	0.00978472	0.0143878	0.0468776	3
P78406	68	RAE1	RAE1_C68	RAE1L_HUMAN mRNA export factor OS=Homo sapiens OX=9606 GN=RAE1 PE=1 SV=1	R	C#WEVQDSGQTIPK	C#WEVQDSGQTIPK	C#WEVQDSGQTIPK	2	2	2	0.0158297	0.0109075	0.0229111	3
P23528	139	CFL1	CFL1_C139	COF1_HUMAN Cofilin-1 OS=Homo sapiens OX=9606 GN=CFL1 PE=1 SV=3	N	C#YEEVKDR	C#YEEVKDR	C#YEEVKDR	1	1	1	0.127849	0.102326	0.243186	3
Q15424	448	SAFB	SAFB_C448	SAFB1_HUMAN Scaffold attachment factor B1 OS=Homo sapiens OX=9606 GN=SAFB PE=1 SV=4	R	C#YGFVTMSTAEEATK	C#YGFVTMSTAEEATK	C#YGFVTMSTAEEATK	2	4	6	0.0125349	0.0116906	0.00683691	3
Q14151	449	SAFB2	SAFB2_C449	SAFB2_HUMAN Scaffold attachment factor B2 OS=Homo sapiens OX=9606 GN=SAFB2 PE=1 SV=1	R	C#YGFVTMSTSDEATK	C#YGFVTMSTSDEATK	C#YGFVTMSTSDEATK	3	3	4	0.0135991	0.0085848	0.00499231	3
O43815	765	STRN	STRN_C765	STRN_HUMAN Striatin OS=Homo sapiens OX=9606 GN=STRN PE=1 SV=4	K	C#YIASAGADALAK	C#YIASAGADALAK	C#YIASAGADALAK	1	1	1	0.148898	0.00216861	0.0048494	3
Q08J23	221	NSUN2	NSUN2_C221	NSUN2_HUMAN tRNA (cytosine(34)-C(5))-methyltransferase OS=Homo sapiens OX=9606 GN=NSUN2 PE=1 SV=2	R	C#YLLVHQAK	C#YLLVHQAK	C#YLLVHQAK	1	1	2	0.0118263	0.00664443	0.0366454	3
Q9UG63	486	ABCF2	ABCF2_C486	ABCF2_HUMAN ATP-binding cassette sub-family F member 2 OS=Homo sapiens OX=9606 GN=ABCF2 PE=1 SV=2	K	C#YPEIK	C#YPEIK	C#YPEIK	2	2	2	0.123036	0.183558	0.13909	3
O00410	229	IPO5	IPO5_C229	IPO5_HUMAN Importin-5 OS=Homo sapiens OX=9606 GN=IPO5 PE=1 SV=4	S	C#YQNDDSVLK	C#YQNDDSVLK	C#YQNDDSVLK	1	1	1	0.0305324	0.0227628	0.168822	3
P20073	298	ANXA7	ANXA7_C298	ANXA7_HUMAN Annexin A7 OS=Homo sapiens OX=9606 GN=ANXA7 PE=1 SV=3	R	C#YQSEFGR	C#YQSEFGR	C#YQSEFGR	2	2	1	0.118605	0.0657989	0.0392166	3
P52272	114	HNRNPM	HNRNPM_C114	HNRPM_HUMAN Heterogeneous nuclear ribonucleoprotein M OS=Homo sapiens OX=9606 GN=HNRNPM PE=1 SV=3	G	C#AVVEFK	C#AVVEFK	C#AVVEFK	2	2	1	0.134804	0.105997	0.331695	3
P45880	47	VDAC2	VDAC2_C47	VDAC2_HUMAN Voltage-dependent anion-selective channel protein 2 OS=Homo sapiens OX=9606 GN=VDAC2 PE=1 SV=2	S	C#SGVEFSTSGSSNTDTGK	C#SGVEFSTSGSSNTDTGK	C#SGVEFSTSGSSNTDTGK	6	5	4	0.000911788	0.000751	0.000507	3
Q8N2K0	52	ABHD12	ABHD12_C52	ABD12_HUMAN Lysophosphatidylserine lipase ABHD12 OS=Homo sapiens OX=9606 GN=ABHD12 PE=1 SV=2	R	C#AADAGMK	C#AADAGMK	NA	1	2	NA	0.0779156	0.20589	NA	2
Q15464	224	SHB	SHB_C224	SHB_HUMAN SH2 domain-containing adapter protein B OS=Homo sapiens OX=9606 GN=SHB PE=1 SV=2	K	C#AASAAEESGAGKK	NA	C#AASAAEESGAGKK	1	NA	1	0.0455359	NA	0.239876	2
Q16643	96	DBN1	DBN1_C96	DREB_HUMAN Drebrin OS=Homo sapiens OX=9606 GN=DBN1 PE=1 SV=4	K	C#ACASHVAK	C#ACASHVAK	NA	1	1	NA	0.188881	0.394619	NA	2
Q9P0R6	59	GSKIP	GSKIP_C59	GSKIP_HUMAN GSK3B-interacting protein OS=Homo sapiens OX=9606 GN=GSKIP PE=1 SV=2	R	C#ADDVAYINVETK	C#ADDVAYINVETK	NA	1	1	NA	0.0258635	0.16669	NA	2
P62829	125	RPL23	RPL23_C125	RL23_HUMAN 60S ribosomal protein L23 OS=Homo sapiens OX=9606 GN=RPL23 PE=1 SV=1	E	C#ADLWPR	C#ADLWPR	NA	1	3	NA	0.287427	0.271924	NA	2
P42566	419	EPS15	EPS15_C419	EPS15_HUMAN Epidermal growth factor receptor substrate 15 OS=Homo sapiens OX=9606 GN=EPS15 PE=1 SV=2	K	C#AEEAQLISSLK	C#AEEAQLISSLK	NA	1	1	NA	0.0571122	0.00442082	NA	2
Q9NSE4	1005	IARS2	IARS2_C1005	SYIM_HUMAN Isoleucine--tRNA ligase, mitochondrial OS=Homo sapiens OX=9606 GN=IARS2 PE=1 SV=2	R	C#AEVVSGK	C#AEVVSGK	NA	2	1	NA	0.215021	0.101879	NA	2
Q99714	91	HSD17B10	HSD17B10_C91	HCD2_HUMAN 3-hydroxyacyl-CoA dehydrogenase type-2 OS=Homo sapiens OX=9606 GN=HSD17B10 PE=1 SV=3	N	C#AGIAVASK	C#AGIAVASK	NA	1	1	NA	0.233268	0.0651198	NA	2
P23396	97	RPS3	RPS3_C97	RS3_HUMAN 40S ribosomal protein S3 OS=Homo sapiens OX=9606 GN=RPS3 PE=1 SV=2	L	C#AIAQAESLR	NA	C#AIAQAESLR	1	NA	1	0.236777	NA	0.00667274	2
Q5VZ89	126	DENND4C	DENND4C_C126	DEN4C_HUMAN DENN domain-containing protein 4C OS=Homo sapiens OX=9606 GN=DENND4C PE=1 SV=3	R	C#ANVNNSSTTSQR	NA	C#ANVNNSSTTSQR	1	NA	1	0.0314589	NA	0.268067	2
O75410	715	TACC1	TACC1_C715	TACC1_HUMAN Transforming acidic coiled-coil-containing protein 1 OS=Homo sapiens OX=9606 GN=TACC1 PE=1 SV=2	K	C#AQDYLAR	C#AQDYLAR	NA	1	1	NA	0.138218	0.134153	NA	2
Q5TC12	321	ATPAF1	ATPAF1_C321	ATPF1_HUMAN ATP synthase mitochondrial F1 complex assembly factor 1 OS=Homo sapiens OX=9606 GN=ATPAF1 PE=1 SV=1	K	C#AQNQNK	NA	C#AQNQNK C#AQNQNKT	1	NA	2	0.0340271	NA	0.193138	2
Q9Y4A5	2449	TRRAP	TRRAP_C2449	TRRAP_HUMAN Transformation/transcription domain-associated protein OS=Homo sapiens OX=9606 GN=TRRAP PE=1 SV=3	R	C#AQPLIR	C#AQPLIR	NA	1	1	NA	0.132468	0.119139	NA	2
Q15417	173	CNN3	CNN3_C173	CNN3_HUMAN Calponin-3 OS=Homo sapiens OX=9606 GN=CNN3 PE=1 SV=1	K	C#ASQAGMTAYGTR	NA	C#ASQAGMTAYGTR	1	NA	2	0.00514762	NA	0.000673254	2
O00186	546	STXBP3	STXBP3_C546	STXB3_HUMAN Syntaxin-binding protein 3 OS=Homo sapiens OX=9606 GN=STXBP3 PE=1 SV=2	R	C#AYEVSQAHK	NA	C#AYEVSQAHK	2	NA	2	0.126107	NA	0.0306988	2
P18077	47	RPL35A	RPL35A_C47	RL35A_HUMAN 60S ribosomal protein L35a OS=Homo sapiens OX=9606 GN=RPL35A PE=1 SV=2	R	C#AYVYK	NA	C#AYVYK	2	NA	2	0.339672	NA	0.189348	2
P17987	357	TCP1	TCP1_C357	TCPA_HUMAN T-complex protein 1 subunit alpha OS=Homo sapiens OX=9606 GN=TCP1 PE=1 SV=1	I	C#DDELILIK	C#DDELILIK	NA	1	1	NA	0.379699	0.08389	NA	2
P26640	381	VARS	VARS_C381	SYVC_HUMAN Valine--tRNA ligase OS=Homo sapiens OX=9606 GN=VARS PE=1 SV=4	G	C#DHAGIATQVVVEK	C#DHAGIATQVVVEK	NA	2	2	NA	0.0744906	0.0202467	NA	2
O00410	110	IPO5	IPO5_C110	IPO5_HUMAN Importin-5 OS=Homo sapiens OX=9606 GN=IPO5 PE=1 SV=4	V	C#DIAAELAR	C#DIAAELAR	NA	2	1	NA	0.162666	0.016467	NA	2
Q00341	948	HDLBP	HDLBP_C948	VIGLN_HUMAN Vigilin OS=Homo sapiens OX=9606 GN=HDLBP PE=1 SV=2	R	C#DIIIISGR	C#DIIIISGR	NA	1	1	NA	0.146029	0.0196452	NA	2
P62820	126	RAB1A	RAB1A_C126	RAB1A_HUMAN Ras-related protein Rab-1A OS=Homo sapiens OX=9606 GN=RAB1A PE=1 SV=3	K	C#DLTTK	NA	C#DLTTK	1	NA	1	0.273441	NA	0.293623	2
P51532	998	SMARCA4	SMARCA4_C998	SMCA4_HUMAN Transcription activator BRG1 OS=Homo sapiens OX=9606 GN=SMARCA4 PE=1 SV=2	K	C#DMSALQR	C#DMSALQR	NA	1	1	NA	0.299333	0.23601	NA	2
O15067	270	PFAS	PFAS_C270	PUR4_HUMAN Phosphoribosylformylglycinamidine synthase OS=Homo sapiens OX=9606 GN=PFAS PE=1 SV=4	F	C#DNSSAIQGK	C#DNSSAIQGK	NA	1	1	NA	0.0722379	0.0622614	NA	2
Q15181	254	PPA1	PPA1_C254	IPYR_HUMAN Inorganic pyrophosphatase OS=Homo sapiens OX=9606 GN=PPA1 PE=1 SV=2	K	C#DPDAAR	NA	C#DPDAAR	1	NA	1	0.267518	NA	0.192203	2
Q8IZD4	369	DCP1B	DCP1B_C369	DCP1B_HUMAN mRNA-decapping enzyme 1B OS=Homo sapiens OX=9606 GN=DCP1B PE=1 SV=2	K	C#DPSTPAPASSAALNR	C#DPSTPAPASSAALNR	NA	1	1	NA	0.188623	0.224932	NA	2
Q9P2E9	933	RRBP1	RRBP1_C933	RRBP1_HUMAN Ribosome-binding protein 1 OS=Homo sapiens OX=9606 GN=RRBP1 PE=1 SV=5	K	C#EELSGLHGQLQEAR	NA	C#EELSGLHGQLQEAR	1	NA	1	0.000270635	NA	1.79e-05	2
P52789	628	HK2	HK2_C628	HXK2_HUMAN Hexokinase-2 OS=Homo sapiens OX=9606 GN=HK2 PE=1 SV=2	G	C#EGEDVVTLLK	C#EGEDVVTLLK	NA	1	1	NA	0.199946	0.0301289	NA	2
O94906	837	PRPF6	PRPF6_C837	PRP6_HUMAN Pre-mRNA-processing factor 6 OS=Homo sapiens OX=9606 GN=PRPF6 PE=1 SV=1	K	C#EHDPHVLLAVAK	C#EHDPHVLLAVAK	NA	1	3	NA	0.0265734	0.0146726	NA	2
Q15003	239	NCAPH	NCAPH_C239	CND2_HUMAN Condensin complex subunit 2 OS=Homo sapiens OX=9606 GN=NCAPH PE=1 SV=3	K	C#EIDPMFQK	NA	C#EIDPMFQK	2	NA	2	0.0389621	NA	0.041021	2
P49454	2052	CENPF	CENPF_C2052	CENPF_HUMAN Centromere protein F OS=Homo sapiens OX=9606 GN=CENPF PE=1 SV=3	K	C#ELENQIAQLNK	NA	C#ELENQIAQLNK	1	NA	1	0.00554091	NA	0.00749318	2
Q14008	1500	CKAP5	CKAP5_C1500	CKAP5_HUMAN Cytoskeleton-associated protein 5 OS=Homo sapiens OX=9606 GN=CKAP5 PE=1 SV=3	R	C#EMPELVQHK	NA	C#EMPELVQHK	1	NA	2	0.00997538	NA	0.041364	2
O75335	697	PPFIA4	PPFIA4_C697	LIPA4_HUMAN Liprin-alpha-4 OS=Homo sapiens OX=9606 GN=PPFIA4 PE=2 SV=3	K	C#ETSPPSSPR	C#ETSPPSSPR	NA	1	1	NA	0.337028	0.222057	NA	2
Q9GZN8	106	C20orf27	C20orf27_C106	CT027_HUMAN UPF0687 protein C20orf27 OS=Homo sapiens OX=9606 GN=C20orf27 PE=1 SV=3	K	C#EYSAHK	C#EYSAHK	NA	1	1	NA	0.202809	0.118613	NA	2
Q00610	491	CLTC	CLTC_C491	CLH1_HUMAN Clathrin heavy chain 1 OS=Homo sapiens OX=9606 GN=CLTC PE=1 SV=5	Q	C#FAETGQVQK	C#FAETGQVQK	NA	1	2	NA	0.163324	0.212965	NA	2
Q96T76	760	MMS19	MMS19_C760	MMS19_HUMAN MMS19 nucleotide excision repair protein homolog OS=Homo sapiens OX=9606 GN=MMS19 PE=1 SV=2	K	C#FAGLLNK	NA	C#FAGLLNK	1	NA	1	0.373503	NA	0.0904642	2
Q96T88	512	UHRF1	UHRF1_C512	UHRF1_HUMAN E3 ubiquitin-protein ligase UHRF1 OS=Homo sapiens OX=9606 GN=UHRF1 PE=1 SV=1	N	C#FAPINDQEGAEAK	C#FAPINDQEGAEAK	NA	1	1	NA	0.0269081	0.100241	NA	2
Q9P2I0	294	CPSF2	CPSF2_C294	CPSF2_HUMAN Cleavage and polyadenylation specificity factor subunit 2 OS=Homo sapiens OX=9606 GN=CPSF2 PE=1 SV=2	R	C#FEDKR	NA	C#FEDKR	1	NA	1	0.323521	NA	0.280887	2
Q92922	108	SMARCC1	SMARCC1_C108	SMRC1_HUMAN SWI/SNF complex subunit SMARCC1 OS=Homo sapiens OX=9606 GN=SMARCC1 PE=1 SV=3	K	C#FMDFK	NA	C#FMDFK	2	NA	3	0.296633	NA	0.224495	2
Q7Z333	997	SETX	SETX_C997	SETX_HUMAN Probable helicase senataxin OS=Homo sapiens OX=9606 GN=SETX PE=1 SV=4	R	C#FTANQNNVGDTSR	NA	C#FTANQNNVGDTSR	1	NA	1	0.011039	NA	0.0167498	2
Q9BTE6	266	AARSD1	AARSD1_C266	AASD1_HUMAN Alanyl-tRNA editing protein Aarsd1 OS=Homo sapiens OX=9606 GN=AARSD1 PE=1 SV=2	K	C#GAEDHVEAVK	NA	C#GAEDHVEAVK	1	NA	1	0.0839669	NA	0.014208	2
Q16527	122	CSRP2	CSRP2_C122	CSRP2_HUMAN Cysteine and glycine-rich protein 2 OS=Homo sapiens OX=9606 GN=CSRP2 PE=1 SV=3	R	C#GDSVYAAEK	NA	C#GDSVYAAEK	1	NA	1	0.0272096	NA	0.0173558	2
Q5VW32	267	BROX	BROX_C267	BROX_HUMAN BRO1 domain-containing protein BROX OS=Homo sapiens OX=9606 GN=BROX PE=1 SV=1	K	C#GEAIR	NA	C#GEAIR	1	NA	1	0.340643	NA	0.274724	2
Q9BYW2	900	SETD2	SETD2_C900	SETD2_HUMAN Histone-lysine N-methyltransferase SETD2 OS=Homo sapiens OX=9606 GN=SETD2 PE=1 SV=3	K	C#GENTSPVLDAVLK	C#GENTSPVLDAVLK	NA	1	1	NA	0.000293761	0.000211793	NA	2
P62633	140	CNBP	CNBP_C140	CNBP_HUMAN Cellular nucleic acid-binding protein OS=Homo sapiens OX=9606 GN=CNBP PE=1 SV=1	R	C#GETGHVAINCSK	NA	C#GETGHVAINCSK	2	NA	2	0.0878382	NA	0.00107	2
Q9NZ32	27	ACTR10	ACTR10_C27	ARP10_HUMAN Actin-related protein 10 OS=Homo sapiens OX=9606 GN=ACTR10 PE=1 SV=1	K	C#GFAGETGPR	NA	C#GFAGETGPR	1	NA	1	0.0258297	NA	0.01251	2
Q9NSC2	216	SALL1	SALL1_C216	SALL1_HUMAN Sal-like protein 1 OS=Homo sapiens OX=9606 GN=SALL1 PE=1 SV=2	R	C#GGASGGK	NA	C#GGASGGK	1	NA	1	0.384115	NA	0.34057	2
Q6IQ49	415	SDE2	SDE2_C415	SDE2_HUMAN Replication stress response regulator SDE2 OS=Homo sapiens OX=9606 GN=SDE2 PE=1 SV=1	K	C#GGTLQER	C#GGTLQER	NA	1	1	NA	0.030728	0.0153031	NA	2
P00488	410	F13A1	F13A1_C410	F13A_HUMAN Coagulation factor XIII A chain OS=Homo sapiens OX=9606 GN=F13A1 PE=1 SV=4	R	C#GPASVQAIK	C#GPASVQAIK	NA	1	1	NA	0.0138651	0.0900242	NA	2
Q86XL3	91	ANKLE2	ANKLE2_C91	ANKL2_HUMAN Ankyrin repeat and LEM domain-containing protein 2 OS=Homo sapiens OX=9606 GN=ANKLE2 PE=1 SV=4	K	C#GPITSTTR	NA	C#GPITSTTR	1	NA	1	0.0462161	NA	0.0432498	2
Q7Z333	2646	SETX	SETX_C2646	SETX_HUMAN Probable helicase senataxin OS=Homo sapiens OX=9606 GN=SETX PE=1 SV=4	K	C#GSETHHTR	NA	C#GSETHHTR	1	NA	1	0.383122	NA	0.0643124	2
P27540	269	ARNT	ARNT_C269	ARNT_HUMAN Aryl hydrocarbon receptor nuclear translocator OS=Homo sapiens OX=9606 GN=ARNT PE=1 SV=1	R	C#GSSSVDPVSVNR	C#GSSSVDPVSVNR	NA	1	1	NA	0.0185247	0.0285545	NA	2
Q8N567	160	ZCCHC9	ZCCHC9_C160	ZCHC9_HUMAN Zinc finger CCHC domain-containing protein 9 OS=Homo sapiens OX=9606 GN=ZCCHC9 PE=1 SV=2	R	C#GSTEHEITK	NA	C#GSTEHEITK	1	NA	1	0.12109	NA	0.392539	2
P62495	97	ETF1	ETF1_C97	ERF1_HUMAN Eukaryotic peptide chain release factor subunit 1 OS=Homo sapiens OX=9606 GN=ETF1 PE=1 SV=3	Y	C#GTIVTEEGK	NA	C#GTIVTEEGK	1	NA	1	0.0311713	NA	0.372893	2
Q29RF7	14	PDS5A	PDS5A_C14	PDS5A_HUMAN Sister chromatid cohesion protein PDS5 homolog A OS=Homo sapiens OX=9606 GN=PDS5A PE=1 SV=1	L	C#GVVSADGK	C#GVVSADGK	NA	2	1	NA	0.129856	0.342245	NA	2
Q99986	220	VRK1	VRK1_C220	VRK1_HUMAN Serine/threonine-protein kinase VRK1 OS=Homo sapiens OX=9606 GN=VRK1 PE=1 SV=1	R	C#HDGTIEFTSIDAHNGVAPSR	NA	C#HDGTIEFTSIDAHNGVAPSR	1	NA	2	0.0054887	NA	0.011638	2
P13637	449	ATP1A3	ATP1A3_C449	AT1A3_HUMAN Sodium/potassium-transporting ATPase subunit alpha-3 OS=Homo sapiens OX=9606 GN=ATP1A3 PE=1 SV=3	K	C#IELSSGSVK	C#IELSSGSVK	NA	1	1	NA	0.170818	0.254539	NA	2
P60842	134	EIF4A1	EIF4A1_C134	IF4A1_HUMAN Eukaryotic initiation factor 4A-I OS=Homo sapiens OX=9606 GN=EIF4A1 PE=1 SV=1	A	C#IGGTNVR	C#IGGTNVR	NA	1	2	NA	0.214128	0.294264	NA	2
Q6P1L8	57	MRPL14	MRPL14_C57	RM14_HUMAN 39S ribosomal protein L14, mitochondrial OS=Homo sapiens OX=9606 GN=MRPL14 PE=1 SV=1	R	C#IHVYK	NA	C#IHVYK	1	NA	1	0.313055	NA	0.358982	2
Q12965	586	MYO1E	MYO1E_C586	MYO1E_HUMAN Unconventional myosin-Ie OS=Homo sapiens OX=9606 GN=MYO1E PE=1 SV=2	R	C#IKPNETK	NA	C#IKPNETK	1	NA	2	0.0531667	NA	0.0916047	2
P26641	194	EEF1G	EEF1G_C194	EF1G_HUMAN Elongation factor 1-gamma OS=Homo sapiens OX=9606 GN=EEF1G PE=1 SV=3	T	C#INQPQFR	C#INQPQFR	NA	1	1	NA	0.280656	0.150429	NA	2
Q92766	309	RREB1	RREB1_C309	RREB1_HUMAN Ras-responsive element-binding protein 1 OS=Homo sapiens OX=9606 GN=RREB1 PE=1 SV=3	R	C#ISEQHR	NA	C#ISEQHR	1	NA	1	0.244538	NA	0.18952	2
Q9NPB9	132	ACKR4	ACKR4_C132	ACKR4_HUMAN Atypical chemokine receptor 4 OS=Homo sapiens OX=9606 GN=ACKR4 PE=1 SV=1	A	C#ISIDR	C#ISIDR	NA	1	1	NA	0.280928	0.340387	NA	2
Q5TGZ0	13	MICOS10	MICOS10_C13	MIC10_HUMAN MICOS complex subunit MIC10 OS=Homo sapiens OX=9606 GN=MICOS10 PE=1 SV=1	R	C#LADAVVK	NA	C#LADAVVK	2	NA	2	0.0353724	NA	0.0288137	2
Q8TB69	20	ZNF519	ZNF519_C20	ZN519_HUMAN Zinc finger protein 519 OS=Homo sapiens OX=9606 GN=ZNF519 PE=2 SV=2	K	C#LDPAQQNLYR	NA	C#LDPAQQNLYR	1	NA	1	0.349634	NA	0.27061	2
P49327	1227	FASN	FASN_C1227	FAS_HUMAN Fatty acid synthase OS=Homo sapiens OX=9606 GN=FASN PE=1 SV=3	A	C#LDTAVENMPSLK	C#LDTAVENMPSLK	NA	1	1	NA	0.132656	0.0183701	NA	2
Q9BW27	603	NUP85	NUP85_C603	NUP85_HUMAN Nuclear pore complex protein Nup85 OS=Homo sapiens OX=9606 GN=NUP85 PE=1 SV=1	R	C#LEDLTSR	NA	C#LEDLTSR	1	NA	1	0.163432	NA	0.132522	2
P62917	115	RPL8	RPL8_C115	RL8_HUMAN 60S ribosomal protein L8 OS=Homo sapiens OX=9606 GN=RPL8 PE=1 SV=2	C	C#LEEKPGDR	NA	C#LEEKPGDR	2	NA	1	0.148617	NA	0.368632	2
P35579	1379	MYH9	MYH9_C1379	MYH9_HUMAN Myosin-9 OS=Homo sapiens OX=9606 GN=MYH9 PE=1 SV=4	G	C#LETAEEVK C#LETAEEVKR	NA	C#LETAEEVK	3	NA	1	0.196155	NA	0.14	2
Q92797	859	SYMPK	SYMPK_C859	SYMPK_HUMAN Symplekin OS=Homo sapiens OX=9606 GN=SYMPK PE=1 SV=2	R	C#LHSLTDK	C#LHSLTDK	NA	1	1	NA	0.0284454	0.0036594	NA	2
Q9NW13	392	RBM28	RBM28_C392	RBM28_HUMAN RNA-binding protein 28 OS=Homo sapiens OX=9606 GN=RBM28 PE=1 SV=3	K	C#LLAASPENEAGGLK	NA	C#LLAASPENEAGGLK	2	NA	1	0.0672558	NA	0.00147552	2
O95602	1562	POLR1A	POLR1A_C1562	RPA1_HUMAN DNA-directed RNA polymerase I subunit RPA1 OS=Homo sapiens OX=9606 GN=POLR1A PE=1 SV=2	R	C#LLNETTNNK	NA	C#LLNETTNNK	1	NA	1	0.168846	NA	0.00583888	2
P62333	170	PSMC6	PSMC6_C170	PRS10_HUMAN 26S proteasome regulatory subunit 10B OS=Homo sapiens OX=9606 GN=PSMC6 PE=1 SV=1	G	C#LLYGPPGTGK	C#LLYGPPGTGK	NA	1	2	NA	0.0598381	0.0308106	NA	2
Q9UPN9	153	TRIM33	TRIM33_C153	TRI33_HUMAN E3 ubiquitin-protein ligase TRIM33 OS=Homo sapiens OX=9606 GN=TRIM33 PE=1 SV=3	R	C#LPEPER	NA	C#LPEPER	1	NA	1	0.26132	NA	0.340913	2
Q8N3C0	1874	ASCC3	ASCC3_C1874	ASCC3_HUMAN Activating signal cointegrator 1 complex subunit 3 OS=Homo sapiens OX=9606 GN=ASCC3 PE=1 SV=3	K	C#LPIESNPHSFDSPHTK	NA	C#LPIESNPHSFDSPHTK	1	NA	2	0.383386	NA	0.0659567	2
P49792	514	RANBP2	RANBP2_C514	RBP2_HUMAN E3 SUMO-protein ligase RanBP2 OS=Homo sapiens OX=9606 GN=RANBP2 PE=1 SV=2	L	C#LPLPVCK	C#LPLPVCK	NA	1	1	NA	0.218963	0.153638	NA	2
Q14241	339	ELOA	ELOA_C339	ELOA1_HUMAN Elongin-A OS=Homo sapiens OX=9606 GN=ELOA PE=1 SV=2	K	C#LPPSEAASDNHLK	C#LPPSEAASDNHLK	NA	1	3	NA	0.0348534	0.207913	NA	2
Q96CS2	156	HAUS1	HAUS1_C156	HAUS1_HUMAN HAUS augmin-like complex subunit 1 OS=Homo sapiens OX=9606 GN=HAUS1 PE=1 SV=1	K	C#LQEDVKK	NA	C#LQEDVKK	1	NA	1	0.182851	NA	0.265881	2
Q92616	1595	GCN1	GCN1_C1595	GCN1_HUMAN eIF-2-alpha kinase activator GCN1 OS=Homo sapiens OX=9606 GN=GCN1 PE=1 SV=6	K	C#LQTLLDTK	C#LQTLLDTK	NA	1	1	NA	0.0193489	0.0207616	NA	2
Q7Z5K2	675	WAPL	WAPL_C675	WAPL_HUMAN Wings apart-like protein homolog OS=Homo sapiens OX=9606 GN=WAPL PE=1 SV=1	R	C#LSVISLATK	NA	C#LSVISLATK	1	NA	1	0.0133373	NA	0.010503	2
Q9GZR7	467	DDX24	DDX24_C467	DDX24_HUMAN ATP-dependent RNA helicase DDX24 OS=Homo sapiens OX=9606 GN=DDX24 PE=1 SV=1	R	C#LVVDEADR	NA	C#LVVDEADR	1	NA	1	0.0829404	NA	0.0637651	2
O14654	1055	IRS4	IRS4_C1055	IRS4_HUMAN Insulin receptor substrate 4 OS=Homo sapiens OX=9606 GN=IRS4 PE=1 SV=1	C	C#MDISLSPSR	C#MDISLSPSR	NA	1	3	NA	0.344945	0.207398	NA	2
Q9UBQ5	87	EIF3K	EIF3K_C87	EIF3K_HUMAN Eukaryotic translation initiation factor 3 subunit K OS=Homo sapiens OX=9606 GN=EIF3K PE=1 SV=1	K	C#MIDQAHQEERPIR	NA	C#MIDQAHQEER C#MIDQAHQEERPIR	2	NA	5	0.116356	NA	0.0294177	2
O75306	146	NDUFS2	NDUFS2_C146	NDUS2_HUMAN NADH dehydrogenase [ubiquinone] iron-sulfur protein 2, mitochondrial OS=Homo sapiens OX=9606 GN=NDUFS2 PE=1 SV=2	M	C#NEQAYSLAVEK	C#NEQAYSLAVEK	NA	1	1	NA	0.0230034	0.0564161	NA	2
P15924	3	DSP	DSP_C3	DESP_HUMAN Desmoplakin OS=Homo sapiens OX=9606 GN=DSP PE=1 SV=3	S	C#NGGSHPR	NA	C#NGGSHPR	1	NA	1	0.35143	NA	0.160682	2
P49368	173	CCT3	CCT3_C173	TCPG_HUMAN T-complex protein 1 subunit gamma OS=Homo sapiens OX=9606 GN=CCT3 PE=1 SV=4	A	C#NIALDAVK	C#NIALDAVK	NA	1	1	NA	0.0510142	0.015548	NA	2
P07195	164	LDHB	LDHB_C164	LDHB_HUMAN L-lactate dehydrogenase B chain OS=Homo sapiens OX=9606 GN=LDHB PE=1 SV=2	G	C#NLDSAR	C#NLDSAR	NA	1	1	NA	0.204239	0.172078	NA	2
Q12846	141	STX4	STX4_C141	STX4_HUMAN Syntaxin-4 OS=Homo sapiens OX=9606 GN=STX4 PE=1 SV=2	K	C#NSMQSEYR	NA	C#NSMQSEYR	1	NA	1	0.364814	NA	0.053799	2
Q9Y277	2	VDAC3	VDAC3_C2	VDAC3_HUMAN Voltage-dependent anion-selective channel protein 3 OS=Homo sapiens OX=9606 GN=VDAC3 PE=1 SV=1	M	C#NTPTYCDLGK	NA	C#NTPTYCDLGK	1	NA	1	0.0317008	NA	0.0918402	2
Q9UFF9	67	CNOT8	CNOT8_C67	CNOT8_HUMAN CCR4-NOT transcription complex subunit 8 OS=Homo sapiens OX=9606 GN=CNOT8 PE=1 SV=1	R	C#NVDLLK	NA	C#NVDLLK	2	NA	1	0.165919	NA	0.0478738	2
P42704	208	LRPPRC	LRPPRC_C208	LPPRC_HUMAN Leucine-rich PPR motif-containing protein, mitochondrial OS=Homo sapiens OX=9606 GN=LRPPRC PE=1 SV=3	Y	C#NVGDIEGASK	NA	C#NVGDIEGASK	1	NA	1	0.0459519	NA	0.20282	2
O43175	281	PHGDH	PHGDH_C281	SERA_HUMAN D-3-phosphoglycerate dehydrogenase OS=Homo sapiens OX=9606 GN=PHGDH PE=1 SV=4	S	C#PHLGASTK	C#PHLGASTK	NA	1	2	NA	0.27319	0.0933628	NA	2
P26358	691	DNMT1	DNMT1_C691	DNMT1_HUMAN DNA (cytosine-5)-methyltransferase 1 OS=Homo sapiens OX=9606 GN=DNMT1 PE=1 SV=2	R	C#PNMAMK	NA	C#PNMAMK	1	NA	1	0.111567	NA	0.0951452	2
Q86YR5	616	GPSM1	GPSM1_C616	GPSM1_HUMAN G-protein-signaling modulator 1 OS=Homo sapiens OX=9606 GN=GPSM1 PE=1 SV=2	R	C#PPPDVLPR	C#PPPDVLPR	NA	1	1	NA	0.0746722	0.0871914	NA	2
A5YKK6	624	CNOT1	CNOT1_C624	CNOT1_HUMAN CCR4-NOT transcription complex subunit 1 OS=Homo sapiens OX=9606 GN=CNOT1 PE=1 SV=2	R	C#PSILGGLAPEKDQPK C#PSILGGLAPEK	C#PSILGGLAPEKDQPK C#PSILGGLAPEK	NA	4	3	NA	0.0284679	0.00298987	NA	2
P18074	259	ERCC2	ERCC2_C259	ERCC2_HUMAN General transcription and DNA repair factor IIH helicase subunit XPD OS=Homo sapiens OX=9606 GN=ERCC2 PE=1 SV=1	R	C#QGNLETLQK	C#QGNLETLQK	NA	1	1	NA	0.0170637	0.00589757	NA	2
Q96FZ2	131	HMCES	HMCES_C131	HMCES_HUMAN Abasic site processing protein HMCES OS=Homo sapiens OX=9606 GN=HMCES PE=1 SV=1	R	C#QGTNQR	NA	C#QGTNQR	1	NA	2	0.176972	NA	0.103024	2
Q5H9R7	431	PPP6R3	PPP6R3_C431	PP6R3_HUMAN Serine/threonine-protein phosphatase 6 regulatory subunit 3 OS=Homo sapiens OX=9606 GN=PPP6R3 PE=1 SV=2	K	C#QLIER	NA	C#QLIER	1	NA	1	0.173642	NA	0.211235	2
Q96DF8	263	ESS2	ESS2_C263	ESS2_HUMAN Splicing factor ESS-2 homolog OS=Homo sapiens OX=9606 GN=ESS2 PE=1 SV=1	R	C#QLQQAAALNAQHK	NA	C#QLQQAAALNAQHK	1	NA	2	0.00763014	NA	0.0699219	2
Q9NZD8	204	SPG21	SPG21_C204	SPG21_HUMAN Maspardin OS=Homo sapiens OX=9606 GN=SPG21 PE=1 SV=1	N	C#QNSYVEPHK	C#QNSYVEPHK	NA	1	1	NA	0.18748	0.177167	NA	2
P49790	1129	NUP153	NUP153_C1129	NU153_HUMAN Nuclear pore complex protein Nup153 OS=Homo sapiens OX=9606 GN=NUP153 PE=1 SV=2	K	C#QPVFSFGNSEQTKDENSSK C#QPVFSFGNSEQTK	NA	C#QPVFSFGNSEQTKDENSSK C#QPVFSFGNSEQTK	2	NA	2	0.173427	NA	0.0259905	2
Q14680	598	MELK	MELK_C598	MELK_HUMAN Maternal embryonic leucine zipper kinase OS=Homo sapiens OX=9606 GN=MELK PE=1 SV=3	K	C#QTQSDFGK	C#QTQSDFGK	NA	1	1	NA	0.211788	0.359692	NA	2
Q9BYC9	93	MRPL20	MRPL20_C93	RM20_HUMAN 39S ribosomal protein L20, mitochondrial OS=Homo sapiens OX=9606 GN=MRPL20 PE=1 SV=1	K	C#QVELNR	NA	C#QVELNR	1	NA	1	0.0942733	NA	0.034812	2
P55795	22	HNRNPH2	HNRNPH2_C22	HNRH2_HUMAN Heterogeneous nuclear ribonucleoprotein H2 OS=Homo sapiens OX=9606 GN=HNRNPH2 PE=1 SV=1	S	C#SADEVMR	C#SADEVMR	NA	2	1	NA	0.201252	0.120492	NA	2
Q9NQW6	71	ANLN	ANLN_C71	ANLN_HUMAN Anillin OS=Homo sapiens OX=9606 GN=ANLN PE=1 SV=2	R	C#SDNTEVEVSNLENK	NA	C#SDNTEVEVSNLENK	1	NA	1	0.0552261	NA	0.064574	2
P23786	512	CPT2	CPT2_C512	CPT2_HUMAN Carnitine O-palmitoyltransferase 2, mitochondrial OS=Homo sapiens OX=9606 GN=CPT2 PE=1 SV=2	R	C#SEAFVR	NA	C#SEAFVR	1	NA	1	0.137256	NA	0.0638978	2
Q00610	459	CLTC	CLTC_C459	CLH1_HUMAN Clathrin heavy chain 1 OS=Homo sapiens OX=9606 GN=CLTC PE=1 SV=5	E	C#SEELGDLVK	C#SEELGDLVK	NA	1	1	NA	0.0597498	0.0660057	NA	2
Q8WXH0	5586	SYNE2	SYNE2_C5586	SYNE2_HUMAN Nesprin-2 OS=Homo sapiens OX=9606 GN=SYNE2 PE=1 SV=3	R	C#SELQGIGLNEK	C#SELQGIGLNEK	NA	1	1	NA	0.00260831	0.084952	NA	2
P23497	780	SP100	SP100_C780	SP100_HUMAN Nuclear autoantigen Sp-100 OS=Homo sapiens OX=9606 GN=SP100 PE=1 SV=3	F	C#SEYRPK	C#SEYRPK	NA	1	1	NA	0.30846	0.311269	NA	2
Q2NL82	753	TSR1	TSR1_C753	TSR1_HUMAN Pre-rRNA-processing protein TSR1 homolog OS=Homo sapiens OX=9606 GN=TSR1 PE=1 SV=1	K	C#SFDGK	NA	C#SFDGK	1	NA	1	0.152308	NA	0.261411	2
Q9H9L3	168	ISG20L2	ISG20L2_C168	I20L2_HUMAN Interferon-stimulated 20 kDa exonuclease-like 2 OS=Homo sapiens OX=9606 GN=ISG20L2 PE=1 SV=1	K	C#SGASQK	C#SGASQK	NA	1	1	NA	0.23621	0.100983	NA	2
O95248	553	SBF1	SBF1_C553	MTMR5_HUMAN Myotubularin-related protein 5 OS=Homo sapiens OX=9606 GN=SBF1 PE=1 SV=4	R	C#SGLHVNSAR	NA	C#SGLHVNSAR	1	NA	1	0.175482	NA	0.231141	2
P21333	1453	FLNA	FLNA_C1453	FLNA_HUMAN Filamin-A OS=Homo sapiens OX=9606 GN=FLNA PE=1 SV=4	K	C#SGPGLSPGMVR	NA	C#SGPGLSPGMVR	1	NA	2	0.263109	NA	0.13048	2
Q8IWR0	149	ZC3H7A	ZC3H7A_C149	Z3H7A_HUMAN Zinc finger CCCH domain-containing protein 7A OS=Homo sapiens OX=9606 GN=ZC3H7A PE=1 SV=1	K	C#SLAVPQDEHVIK	NA	C#SLAVPQDEHVIK	1	NA	1	0.00393877	NA	0.287638	2
Q96MI9	855	AGBL1	AGBL1_C855	CBPC4_HUMAN Cytosolic carboxypeptidase 4 OS=Homo sapiens OX=9606 GN=AGBL1 PE=1 SV=3	R	C#SLSGEDLNR	NA	C#SLSGEDLNR	1	NA	1	0.00628959	NA	0.0100906	2
Q14192	254	FHL2	FHL2_C254	FHL2_HUMAN Four and a half LIM domains protein 2 OS=Homo sapiens OX=9606 GN=FHL2 PE=1 SV=3	K	C#SLSLVGR	NA	C#SLSLVGR	1	NA	1	0.187422	NA	0.0843623	2
Q27J81	650	INF2	INF2_C650	INF2_HUMAN Inverted formin-2 OS=Homo sapiens OX=9606 GN=INF2 PE=1 SV=2	K	C#SNEEVAAMIR	C#SNEEVAAMIR	NA	1	1	NA	0.346255	0.190263	NA	2
P38398	712	BRCA1	BRCA1_C712	BRCA1_HUMAN Breast cancer type 1 susceptibility protein OS=Homo sapiens OX=9606 GN=BRCA1 PE=1 SV=2	K	C#SNTSELK	C#SNTSELK	NA	1	1	NA	0.0910642	0.239559	NA	2
Q12979	201	ABR	ABR_C201	ABR_HUMAN Active breakpoint cluster region-related protein OS=Homo sapiens OX=9606 GN=ABR PE=1 SV=2	K	C#SQSNNQFQK	NA	C#SQSNNQFQK	1	NA	1	0.0191481	NA	0.0051588	2
O75534	53	CSDE1	CSDE1_C53	CSDE1_HUMAN Cold shock domain-containing protein E1 OS=Homo sapiens OX=9606 GN=CSDE1 PE=1 SV=2	H	C#SQYNGNLQDLK	NA	C#SQYNGNLQDLK	1	NA	1	0.115604	NA	0.0433343	2
Q9BSD7	101	NTPCR	NTPCR_C101	NTPCR_HUMAN Cancer-related nucleoside-triphosphatase OS=Homo sapiens OX=9606 GN=NTPCR PE=1 SV=1	D	C#SSGPGQR	C#SSGPGQR	NA	1	1	NA	0.195916	0.358857	NA	2
Q92879	177	CELF1	CELF1_C177	CELF1_HUMAN CUGBP Elav-like family member 1 OS=Homo sapiens OX=9606 GN=CELF1 PE=1 SV=2	G	C#SSPMVVK	C#SSPMVVK	NA	1	2	NA	0.279521	0.337436	NA	2
Q12923	2024	PTPN13	PTPN13_C2024	PTN13_HUMAN Tyrosine-protein phosphatase non-receptor type 13 OS=Homo sapiens OX=9606 GN=PTPN13 PE=1 SV=2	K	C#STYQIK	NA	C#STYQIK	1	NA	1	0.288999	NA	0.268794	2
O14772	424	FPGT	FPGT_C424	FPGT_HUMAN Fucose-1-phosphate guanylyltransferase OS=Homo sapiens OX=9606 GN=FPGT PE=1 SV=3	R	C#SVAPGSVVEYSR	C#SVAPGSVVEYSR	NA	1	2	NA	0.314725	0.322845	NA	2
P20042	309	EIF2S2	EIF2S2_C309	IF2B_HUMAN Eukaryotic translation initiation factor 2 subunit 2 OS=Homo sapiens OX=9606 GN=EIF2S2 PE=1 SV=2	R	C#SVASIK	NA	C#SVASIK	1	NA	1	0.159529	NA	0.0770685	2
O43824	394	GTPBP6	GTPBP6_C394	GTPB6_HUMAN Putative GTP-binding protein 6 OS=Homo sapiens OX=9606 GN=GTPBP6 PE=2 SV=4	K	C#SVLSTLR	C#SVLSTLR	NA	1	1	NA	0.212403	0.167156	NA	2
Q96DI7	291	SNRNP40	SNRNP40_C291	SNR40_HUMAN U5 small nuclear ribonucleoprotein 40 kDa protein OS=Homo sapiens OX=9606 GN=SNRNP40 PE=1 SV=1	R	C#SWSPDGSK	NA	C#SWSPDGSK	1	NA	1	0.317822	NA	0.0210603	2
O75448	134	MED24	MED24_C134	MED24_HUMAN Mediator of RNA polymerase II transcription subunit 24 OS=Homo sapiens OX=9606 GN=MED24 PE=1 SV=1	R	C#TAASAER	C#TAASAER	NA	1	1	NA	0.341618	0.405706	NA	2
O60942	565	RNGTT	RNGTT_C565	MCE1_HUMAN mRNA-capping enzyme OS=Homo sapiens OX=9606 GN=RNGTT PE=1 SV=1	R	C#TAASQGQK	C#TAASQGQK	NA	1	1	NA	0.0159429	0.024026	NA	2
Q14738	17	PPP2R5D	PPP2R5D_C17	2A5D_HUMAN Serine/threonine-protein phosphatase 2A 56 kDa regulatory subunit delta isoform OS=Homo sapiens OX=9606 GN=PPP2R5D PE=1 SV=1	K	C#TAKPSSSGK	NA	C#TAKPSSSGK	1	NA	1	0.140965	NA	0.0887891	2
Q14839	493	CHD4	CHD4_C493	CHD4_HUMAN Chromodomain-helicase-DNA-binding protein 4 OS=Homo sapiens OX=9606 GN=CHD4 PE=1 SV=2	R	C#TCPALK	NA	C#TCPALK	1	NA	1	0.178216	NA	0.143184	2
Q5M775	470	SPECC1	SPECC1_C470	CYTSB_HUMAN Cytospin-B OS=Homo sapiens OX=9606 GN=SPECC1 PE=1 SV=1	K	C#TGILEQGR	NA	C#TGILEQGR	1	NA	1	0.135557	NA	0.0581374	2
P17706	330	PTPN2	PTPN2_C330	PTN2_HUMAN Tyrosine-protein phosphatase non-receptor type 2 OS=Homo sapiens OX=9606 GN=PTPN2 PE=1 SV=2	R	C#TGLSSK	NA	C#TGLSSK	1	NA	1	0.154412	NA	0.0551635	2
Q15061	315	WDR43	WDR43_C315	WDR43_HUMAN WD repeat-containing protein 43 OS=Homo sapiens OX=9606 GN=WDR43 PE=1 SV=3	N	C#TIQIATPGK	NA	C#TIQIATPGK	1	NA	1	0.0118037	NA	0.0382706	2
Q92499	668	DDX1	DDX1_C668	DDX1_HUMAN ATP-dependent RNA helicase DDX1 OS=Homo sapiens OX=9606 GN=DDX1 PE=1 SV=2	N	C#TISQVEPDIK	C#TISQVEPDIK	NA	1	2	NA	0.384992	0.278007	NA	2
P60891	165	PRPS1	PRPS1_C165	PRPS1_HUMAN Ribose-phosphate pyrophosphokinase 1 OS=Homo sapiens OX=9606 GN=PRPS1 PE=1 SV=2	N	C#TIVSPDAGGAK	C#TIVSPDAGGAK	NA	1	1	NA	0.00555205	0.000339173	NA	2
Q96A26	41	FAM162A	FAM162A_C41	F162A_HUMAN Protein FAM162A OS=Homo sapiens OX=9606 GN=FAM162A PE=1 SV=2	F	C#TKPQESPGAPSR	NA	C#TKPQESPGAPSR	2	NA	1	0.13316	NA	0.0948967	2
P23528	147	CFL1	CFL1_C147	COF1_HUMAN Cofilin-1 OS=Homo sapiens OX=9606 GN=CFL1 PE=1 SV=3	R	C#TLAEK	C#TLAEK	NA	2	1	NA	0.178776	0.126315	NA	2
Q02880	476	TOP2B	TOP2B_C476	TOP2B_HUMAN DNA topoisomerase 2-beta OS=Homo sapiens OX=9606 GN=TOP2B PE=1 SV=3	E	C#TLILTEGDSAK	C#TLILTEGDSAK	NA	1	1	NA	0.177694	0.0144229	NA	2
P62854	23	RPS26	RPS26_C23	RS26_HUMAN 40S ribosomal protein S26 OS=Homo sapiens OX=9606 GN=RPS26 PE=1 SV=3	R	C#TNCAR	C#TNCAR	NA	1	1	NA	0.218244	0.396674	NA	2
Q9H2U2	290	PPA2	PPA2_C290	IPYR2_HUMAN Inorganic pyrophosphatase 2, mitochondrial OS=Homo sapiens OX=9606 GN=PPA2 PE=1 SV=2	N	C#TNVQISDSPFR	C#TNVQISDSPFR	NA	1	1	NA	0.240365	0.144294	NA	2
Q14241	610	ELOA	ELOA_C610	ELOA1_HUMAN Elongin-A OS=Homo sapiens OX=9606 GN=ELOA PE=1 SV=2	R	C#TPDQLYR	NA	C#TPDQLYR	1	NA	1	0.189823	NA	0.255768	2
Q9Y490	1353	TLN1	TLN1_C1353	TLN1_HUMAN Talin-1 OS=Homo sapiens OX=9606 GN=TLN1 PE=1 SV=3	M	C#TQQAPGQK	NA	C#TQQAPGQK	2	NA	2	0.137433	NA	0.0678473	2
P14868	130	DARS	DARS_C130	SYDC_HUMAN Aspartate--tRNA ligase, cytoplasmic OS=Homo sapiens OX=9606 GN=DARS PE=1 SV=2	S	C#TQQDVELHVQK	C#TQQDVELHVQK	NA	2	1	NA	0.0256268	0.00582937	NA	2
P31040	266	SDHA	SDHA_C266	SDHA_HUMAN Succinate dehydrogenase [ubiquinone] flavoprotein subunit, mitochondrial OS=Homo sapiens OX=9606 GN=SDHA PE=1 SV=2	S	C#TSAHTSTGDGTAMITR	NA	C#TSAHTSTGDGTAMITR	2	NA	1	0.176067	NA	0.326174	2
O75146	650	HIP1R	HIP1R_C650	HIP1R_HUMAN Huntingtin-interacting protein 1-related protein OS=Homo sapiens OX=9606 GN=HIP1R PE=1 SV=2	R	C#TSSPDYLVSR	C#TSSPDYLVSR	NA	1	1	NA	0.375467	0.0727375	NA	2
Q68D10	535	SPTY2D1	SPTY2D1_C535	SPT2_HUMAN Protein SPT2 homolog OS=Homo sapiens OX=9606 GN=SPTY2D1 PE=1 SV=3	K	C#TVVSETISSK	C#TVVSETISSK	NA	1	1	NA	0.00353004	0.00845598	NA	2
Q6ZUV0	22	ACOT7L	ACOT7L_C22	BACHL_HUMAN Putative cytosolic acyl coenzyme A thioester hydrolase-like OS=Homo sapiens OX=9606 GN=ACOT7L PE=5 SV=1	R	C#VAALAR	NA	C#VAALAR	1	NA	1	0.140081	NA	0.0780371	2
P33992	221	MCM5	MCM5_C221	MCM5_HUMAN DNA replication licensing factor MCM5 OS=Homo sapiens OX=9606 GN=MCM5 PE=1 SV=5	K	C#VDFQTLK	C#VDFQTLK	NA	2	2	NA	0.0970202	0.0203275	NA	2
O95292	121	VAPB	VAPB_C121	VAPB_HUMAN Vesicle-associated membrane protein-associated protein B/C OS=Homo sapiens OX=9606 GN=VAPB PE=1 SV=3	R	C#VFELPAENDKPHDVEINK	C#VFELPAENDKPHDVEINK	NA	1	1	NA	0.16562	0.029035	NA	2
P35221	526	CTNNA1	CTNNA1_C526	CTNA1_HUMAN Catenin alpha-1 OS=Homo sapiens OX=9606 GN=CTNNA1 PE=1 SV=1	K	C#VIALQEK	NA	C#VIALQEK	1	NA	1	0.0492824	NA	0.114294	2
O60783	91	MRPS14	MRPS14_C91	RT14_HUMAN 28S ribosomal protein S14, mitochondrial OS=Homo sapiens OX=9606 GN=MRPS14 PE=1 SV=1	R	C#VMTSR	NA	C#VMTSR	1	NA	1	0.307334	NA	0.286849	2
Q9H0H5	369	RACGAP1	RACGAP1_C369	RGAP1_HUMAN Rac GTPase-activating protein 1 OS=Homo sapiens OX=9606 GN=RACGAP1 PE=1 SV=1	H	C#VNEIEQR	C#VNEIEQR	NA	1	1	NA	0.0701798	0.364957	NA	2
Q9BTE3	636	MCMBP	MCMBP_C636	MCMBP_HUMAN Mini-chromosome maintenance complex-binding protein OS=Homo sapiens OX=9606 GN=MCMBP PE=1 SV=2	K	C#VNGNEL	NA	C#VNGNEL	1	NA	1	0.362541	NA	0.280184	2
Q9Y3A5	119	SBDS	SBDS_C119	SBDS_HUMAN Ribosome maturation protein SBDS OS=Homo sapiens OX=9606 GN=SBDS PE=1 SV=4	K	C#VNPETK	C#VNPETK	NA	1	2	NA	0.03896	0.176433	NA	2
Q96HN2	353	AHCYL2	AHCYL2_C353	SAHH3_HUMAN Adenosylhomocysteinase 3 OS=Homo sapiens OX=9606 GN=AHCYL2 PE=1 SV=1	L	C#VPAMNVNDSVTK	C#VPAMNVNDSVTK	NA	1	1	NA	0.0326284	0.112495	NA	2
P57076	83	CFAP298	CFAP298_C83	CF298_HUMAN Cilia- and flagella-associated protein 298 OS=Homo sapiens OX=9606 GN=CFAP298 PE=1 SV=1	K	C#VPSGGAVFK	C#VPSGGAVFK	NA	1	2	NA	0.0399549	0.26825	NA	2
P33240	150	CSTF2	CSTF2_C150	CSTF2_HUMAN Cleavage stimulation factor subunit 2 OS=Homo sapiens OX=9606 GN=CSTF2 PE=1 SV=1	L	C#VQNSPQEAR	NA	C#VQNSPQEAR	1	NA	1	0.332012	NA	0.304285	2
P16615	997	ATP2A2	ATP2A2_C997	AT2A2_HUMAN Sarcoplasmic/endoplasmic reticulum calcium ATPase 2 OS=Homo sapiens OX=9606 GN=ATP2A2 PE=1 SV=1	E	C#VQPATK	C#VQPATK	NA	1	1	NA	0.337932	0.287804	NA	2
O15270	438	SPTLC2	SPTLC2_C438	SPTC2_HUMAN Serine palmitoyltransferase 2 OS=Homo sapiens OX=9606 GN=SPTLC2 PE=1 SV=1	E	C#VQQLAENTR	C#VQQLAENTR	NA	1	1	NA	0.301443	0.0976547	NA	2
Q7L0Y3	78	TRMT10C	TRMT10C_C78	TM10C_HUMAN tRNA methyltransferase 10 homolog C OS=Homo sapiens OX=9606 GN=TRMT10C PE=1 SV=2	E	C#VSTISSSKDEDPLAATR C#VSTISSSK	C#VSTISSSK	NA	2	1	NA	0.16931	0.405365	NA	2
Q9NQT8	26	KIF13B	KIF13B_C26	KI13B_HUMAN Kinesin-like protein KIF13B OS=Homo sapiens OX=9606 GN=KIF13B PE=1 SV=2	K	C#VVDVDANK	C#VVDVDANK	NA	1	1	NA	0.170045	0.0310164	NA	2
Q9P2D1	1101	CHD7	CHD7_C1101	CHD7_HUMAN Chromodomain-helicase-DNA-binding protein 7 OS=Homo sapiens OX=9606 GN=CHD7 PE=1 SV=3	R	C#VVIDEAHR	C#VVIDEAHR	NA	2	1	NA	0.156412	0.370843	NA	2
Q9NU22	1598	MDN1	MDN1_C1598	MDN1_HUMAN Midasin OS=Homo sapiens OX=9606 GN=MDN1 PE=1 SV=2	K	C#VVSIR	NA	C#VVSIR	1	NA	1	0.235313	NA	0.188486	2
P63000	6	RAC1	RAC1_C6	RAC1_HUMAN Ras-related C3 botulinum toxin substrate 1 OS=Homo sapiens OX=9606 GN=RAC1 PE=1 SV=1	K	C#VVVGDGAVGK	NA	C#VVVGDGAVGK	1	NA	2	0.00232353	NA	0.00154948	2
Q8TEQ6	240	GEMIN5	GEMIN5_C240	GEMI5_HUMAN Gem-associated protein 5 OS=Homo sapiens OX=9606 GN=GEMIN5 PE=1 SV=3	G	C#YLATGSK	C#YLATGSK	NA	1	1	NA	0.306862	0.266391	NA	2
Q16850	337	CYP51A1	CYP51A1_C337	CP51A_HUMAN Lanosterol 14-alpha demethylase OS=Homo sapiens OX=9606 GN=CYP51A1 PE=1 SV=3	K	C#YLEQK	NA	C#YLEQK	1	NA	1	0.379671	NA	0.328917	2
Q12769	916	NUP160	NUP160_C916	NU160_HUMAN Nuclear pore complex protein Nup160 OS=Homo sapiens OX=9606 GN=NUP160 PE=1 SV=3	R	C#YLVTGEGQK	NA	C#YLVTGEGQK	1	NA	1	0.236396	NA	0.153957	2
P41214	528	EIF2D	EIF2D_C528	EIF2D_HUMAN Eukaryotic translation initiation factor 2D OS=Homo sapiens OX=9606 GN=EIF2D PE=1 SV=3	R	NA	C#QASTTVNPAPGAK	C#QASTTVNPAPGAK	NA	1	1	NA	0.000154724	0.000321176	2
Q9NYV4	1009	CDK12	CDK12_C1009	CDK12_HUMAN Cyclin-dependent kinase 12 OS=Homo sapiens OX=9606 GN=CDK12 PE=1 SV=2	R	NA	C#TAEQTLQSDFLK	C#TAEQTLQSDFLK	NA	1	1	NA	0.000211649	0.000753002	2
Q00610	1102	CLTC	CLTC_C1102	CLH1_HUMAN Clathrin heavy chain 1 OS=Homo sapiens OX=9606 GN=CLTC PE=1 SV=5	R	NA	C#NEPAVWSQLAK	C#NEPAVWSQLAK	NA	1	2	NA	0.000306523	0.00219184	2
P09936	90	UCHL1	UCHL1_C90	UCHL1_HUMAN Ubiquitin carboxyl-terminal hydrolase isozyme L1 OS=Homo sapiens OX=9606 GN=UCHL1 PE=1 SV=2	S	NA	C#GTIGLIHAVANNQDK	C#GTIGLIHAVANNQDK	NA	2	3	NA	0.00072708	0.00387202	2
Q15233	208	NONO	NONO_C208	NONO_HUMAN Non-POU domain-containing octamer-binding protein OS=Homo sapiens OX=9606 GN=NONO PE=1 SV=4	R	NA	C#SEGSFLLTTFPR	C#SEGSFLLTTFPR	NA	2	3	NA	0.00902687	0.0207173	2
O15226	246	NKRF	NKRF_C246	NKRF_HUMAN NF-kappa-B-repressing factor OS=Homo sapiens OX=9606 GN=NKRF PE=1 SV=2	R	NA	C#QNIYLTTGYAGSK	C#QNIYLTTGYAGSK	NA	1	1	NA	0.000721389	0.000922574	2
P67775	269	PPP2CA	PPP2CA_C269	PP2AA_HUMAN Serine/threonine-protein phosphatase 2A catalytic subunit alpha isoform OS=Homo sapiens OX=9606 GN=PPP2CA PE=1 SV=1	R	NA	C#GNQAAIMELDDTLK	C#GNQAAIMELDDTLK	NA	2	4	NA	0.151079	0.00750107	2
P19367	886	HK1	HK1_C886	HXK1_HUMAN Hexokinase-1 OS=Homo sapiens OX=9606 GN=HK1 PE=1 SV=3	K	NA	C#NVSFLLSEDGSGK	C#NVSFLLSEDGSGK	NA	1	1	NA	0.00108726	0.000343177	2
Q16186	357	ADRM1	ADRM1_C357	ADRM1_HUMAN Proteasomal ubiquitin receptor ADRM1 OS=Homo sapiens OX=9606 GN=ADRM1 PE=1 SV=2	M	NA	C#QFGLPAEAVEAANK	C#QFGLPAEAVEAANK	NA	1	2	NA	0.00144597	0.0162963	2
P11142	574	HSPA8	HSPA8_C574	HSP7C_HUMAN Heat shock cognate 71 kDa protein OS=Homo sapiens OX=9606 GN=HSPA8 PE=1 SV=1	K	NA	C#NEIINWLDK	C#NEIINWLDK C#NEIINWLDKNQTAEK C#NEIINWLDKNQTAEKEEFEHQQK	NA	2	7	NA	0.0268897	0.0139928	2
Q13098	251	GPS1	GPS1_C251	CSN1_HUMAN COP9 signalosome complex subunit 1 OS=Homo sapiens OX=9606 GN=GPS1 PE=1 SV=4	K	NA	C#AAGLAELAAR	C#AAGLAELAAR	NA	1	2	NA	0.00221113	0.000735872	2
Q92598	34	HSPH1	HSPH1_C34	HS105_HUMAN Heat shock protein 105 kDa OS=Homo sapiens OX=9606 GN=HSPH1 PE=1 SV=1	R	NA	C#TPSVISFGSK	C#TPSVISFGSK	NA	2	2	NA	0.0045722	0.102342	2
O00232	109	PSMD12	PSMD12_C109	PSD12_HUMAN 26S proteasome non-ATPase regulatory subunit 12 OS=Homo sapiens OX=9606 GN=PSMD12 PE=1 SV=3	C	NA	C#TYVEEITDLPIK	C#TYVEEITDLPIK	NA	1	1	NA	0.00404944	0.0203089	2
Q9H0U9	160	TSPYL1	TSPYL1_C160	TSYL1_HUMAN Testis-specific Y-encoded-like protein 1 OS=Homo sapiens OX=9606 GN=TSPYL1 PE=1 SV=3	K	NA	C#ATVSAAVAER	C#ATVSAAVAER	NA	1	1	NA	0.00454886	0.000760814	2
P33993	482	MCM7	MCM7_C482	MCM7_HUMAN DNA replication licensing factor MCM7 OS=Homo sapiens OX=9606 GN=MCM7 PE=1 SV=4	R	NA	C#SILAAANPAYGR	C#SILAAANPAYGR	NA	1	2	NA	0.00530583	0.0814732	2
Q16763	118	UBE2S	UBE2S_C118	UBE2S_HUMAN Ubiquitin-conjugating enzyme E2 S OS=Homo sapiens OX=9606 GN=UBE2S PE=1 SV=2	K	NA	C#LLIHPNPESALNEEAGR	C#LLIHPNPESALNEEAGR	NA	1	2	NA	0.00540479	0.0185223	2
O75369	1617	FLNB	FLNB_C1617	FLNB_HUMAN Filamin-B OS=Homo sapiens OX=9606 GN=FLNB PE=1 SV=2	K	NA	C#LATGPGIASTVK	C#LATGPGIASTVK	NA	1	1	NA	0.00552408	0.000674146	2
P48643	440	CCT5	CCT5_C440	TCPE_HUMAN T-complex protein 1 subunit epsilon OS=Homo sapiens OX=9606 GN=CCT5 PE=1 SV=1	K	NA	C#PTLEQYAMR	C#PTLEQYAMR	NA	3	4	NA	0.0273058	0.00571226	2
P04920	1215	SLC4A2	SLC4A2_C1215	B3A2_HUMAN Anion exchange protein 2 OS=Homo sapiens OX=9606 GN=SLC4A2 PE=1 SV=4	K	NA	C#LDANEAEPVFDER	C#LDANEAEPVFDER	NA	1	1	NA	0.00649394	0.0586156	2
Q9UL46	91	PSME2	PSME2_C91	PSME2_HUMAN Proteasome activator complex subunit 2 OS=Homo sapiens OX=9606 GN=PSME2 PE=1 SV=4	K	NA	C#GFLPGNEK	C#GFLPGNEK	NA	1	2	NA	0.00658712	0.019094	2
Q96KR1	899	ZFR	ZFR_C899	ZFR_HUMAN Zinc finger RNA-binding protein OS=Homo sapiens OX=9606 GN=ZFR PE=1 SV=2	K	NA	C#LDALAALR	C#LDALAALR	NA	1	1	NA	0.00756252	0.00997044	2
Q12789	570	GTF3C1	GTF3C1_C570	TF3C1_HUMAN General transcription factor 3C polypeptide 1 OS=Homo sapiens OX=9606 GN=GTF3C1 PE=1 SV=4	H	NA	C#ADSNSGDIAVIEEVR	C#ADSNSGDIAVIEEVR	NA	1	1	NA	0.00775648	0.106112	2
Q00839	453	HNRNPU	HNRNPU_C453	HNRPU_HUMAN Heterogeneous nuclear ribonucleoprotein U OS=Homo sapiens OX=9606 GN=HNRNPU PE=1 SV=6	N	NA	C#AVEFNFGQK	C#AVEFNFGQK	NA	1	1	NA	0.00846764	0.104637	2
Q99832	450	CCT7	CCT7_C450	TCPH_HUMAN T-complex protein 1 subunit eta OS=Homo sapiens OX=9606 GN=CCT7 PE=1 SV=2	L	NA	C#DNAGFDATNILNK	C#DNAGFDATNILNK	NA	1	1	NA	0.00846865	0.234208	2
Q86VP6	356	CAND1	CAND1_C356	CAND1_HUMAN Cullin-associated NEDD8-dissociated protein 1 OS=Homo sapiens OX=9606 GN=CAND1 PE=1 SV=2	K	NA	C#LDAVVSTR	C#LDAVVSTR	NA	1	1	NA	0.00857476	0.00886517	2
Q06210	620	GFPT1	GFPT1_C620	GFPT1_HUMAN Glutamine--fructose-6-phosphate aminotransferase [isomerizing] 1 OS=Homo sapiens OX=9606 GN=GFPT1 PE=1 SV=3	K	NA	C#QNALQQVVAR	C#QNALQQVVAR	NA	1	1	NA	0.0096957	0.00334733	2
P10599	73	TXN	TXN_C73	THIO_HUMAN Thioredoxin OS=Homo sapiens OX=9606 GN=TXN PE=1 SV=3	K	NA	C#MPTFQFFK	C#MPTFQFFK	NA	2	2	NA	0.0237642	0.0114328	2
Q9Y490	1087	TLN1	TLN1_C1087	TLN1_HUMAN Talin-1 OS=Homo sapiens OX=9606 GN=TLN1 PE=1 SV=3	K	NA	C#TQDLGNSTK	C#TQDLGNSTK	NA	1	1	NA	0.01137	0.00284606	2
Q9BU89	232	DOHH	DOHH_C232	DOHH_HUMAN Deoxyhypusine hydroxylase OS=Homo sapiens OX=9606 GN=DOHH PE=1 SV=1	R	NA	C#TENPMVR	C#TENPMVR	NA	1	2	NA	0.0140917	0.0366069	2
Q96I51	329	RCC1L	RCC1L_C329	RCC1L_HUMAN RCC1-like G exchanging factor-like protein OS=Homo sapiens OX=9606 GN=RCC1L PE=1 SV=2	R	NA	C#LHFSGVGK	C#LHFSGVGK	NA	1	1	NA	0.0145518	0.0538443	2
Q32MZ4	456	LRRFIP1	LRRFIP1_C456	LRRF1_HUMAN Leucine-rich repeat flightless-interacting protein 1 OS=Homo sapiens OX=9606 GN=LRRFIP1 PE=1 SV=2	K	NA	C#MVEVPQELETSTGHSLEK	C#MVEVPQELETSTGHSLEK	NA	1	1	NA	0.0160863	0.00119631	2
Q15181	242	PPA1	PPA1_C242	IPYR_HUMAN Inorganic pyrophosphatase OS=Homo sapiens OX=9606 GN=PPA1 PE=1 SV=2	S	NA	C#MNTTLSESPFK	C#MNTTLSESPFK	NA	3	2	NA	0.0259569	0.0931555	2
O60343	316	TBC1D4	TBC1D4_C316	TBCD4_HUMAN TBC1 domain family member 4 OS=Homo sapiens OX=9606 GN=TBC1D4 PE=1 SV=2	R	NA	C#SSVTGVQR	C#SSVTGVQR	NA	1	1	NA	0.0163243	0.0222729	2
P20585	166	MSH3	MSH3_C166	MSH3_HUMAN DNA mismatch repair protein Msh3 OS=Homo sapiens OX=9606 GN=MSH3 PE=1 SV=4	K	NA	C#TDFDDISLLHAK	C#TDFDDISLLHAK	NA	1	2	NA	0.0167555	0.00431272	2
Q9NVH0	284	EXD2	EXD2_C284	EXD2_HUMAN Exonuclease 3'-5' domain-containing protein 2 OS=Homo sapiens OX=9606 GN=EXD2 PE=1 SV=2	K	NA	C#QGVVDIPFR	C#QGVVDIPFR	NA	1	1	NA	0.0194033	0.0111675	2
Q7L2H7	134	EIF3M	EIF3M_C134	EIF3M_HUMAN Eukaryotic translation initiation factor 3 subunit M OS=Homo sapiens OX=9606 GN=EIF3M PE=1 SV=1	S	NA	C#GAIQYIPTELDQVR	C#GAIQYIPTELDQVR	NA	2	2	NA	0.0229827	0.100509	2
Q8TAT6	208	NPLOC4	NPLOC4_C208	NPL4_HUMAN Nuclear protein localization protein 4 homolog OS=Homo sapiens OX=9606 GN=NPLOC4 PE=1 SV=3	K	NA	C#QPSAITLNR	C#QPSAITLNR	NA	1	1	NA	0.0206038	0.00801908	2
Q9Y217	214	MTMR6	MTMR6_C214	MTMR6_HUMAN Myotubularin-related protein 6 OS=Homo sapiens OX=9606 GN=MTMR6 PE=1 SV=3	R	NA	C#LEDEHLLQAISK	C#LEDEHLLQAISK	NA	1	2	NA	0.0211274	0.0106322	2
Q13813	1314	SPTAN1	SPTAN1_C1314	SPTN1_HUMAN Spectrin alpha chain, non-erythrocytic 1 OS=Homo sapiens OX=9606 GN=SPTAN1 PE=1 SV=3	K	NA	C#TELNQAWSSLGK	C#TELNQAWSSLGK	NA	1	1	NA	0.0243762	0.00159608	2
Q01433	230	AMPD2	AMPD2_C230	AMPD2_HUMAN AMP deaminase 2 OS=Homo sapiens OX=9606 GN=AMPD2 PE=1 SV=2	K	NA	C#GVPFTDLLDAAK	C#GVPFTDLLDAAK	NA	1	1	NA	0.0248673	0.354411	2
P41252	87	IARS	IARS_C87	SYIC_HUMAN Isoleucine--tRNA ligase, cytoplasmic OS=Homo sapiens OX=9606 GN=IARS PE=1 SV=2	D	NA	C#HGLPVEYEIDK	C#HGLPVEYEIDK	NA	2	2	NA	0.141709	0.0635055	2
Q14204	1888	DYNC1H1	DYNC1H1_C1888	DYHC1_HUMAN Cytoplasmic dynein 1 heavy chain 1 OS=Homo sapiens OX=9606 GN=DYNC1H1 PE=1 SV=5	R	NA	C#YLTMTQALEAR	C#YLTMTQALEAR	NA	1	2	NA	0.0258592	0.20129	2
Q96KM6	129	ZNF512B	ZNF512B_C129	Z512B_HUMAN Zinc finger protein 512B OS=Homo sapiens OX=9606 GN=ZNF512B PE=1 SV=1	R	NA	C#QGGAISDR	C#QGGAISDR	NA	1	1	NA	0.0259614	0.0181705	2
Q9NVN8	152	GNL3L	GNL3L_C152	GNL3L_HUMAN Guanine nucleotide-binding protein-like 3-like protein OS=Homo sapiens OX=9606 GN=GNL3L PE=1 SV=1	R	NA	C#FQMEEAVLR	C#FQMEEAVLR	NA	1	2	NA	0.0265267	0.196913	2
Q96AE4	148	FUBP1	FUBP1_C148	FUBP1_HUMAN Far upstream element-binding protein 1 OS=Homo sapiens OX=9606 GN=FUBP1 PE=1 SV=3	S	NA	C#MLTGTPESVQSAK	C#MLTGTPESVQSAK	NA	1	2	NA	0.0268464	0.186207	2
Q02880	237	TOP2B	TOP2B_C237	TOP2B_HUMAN DNA topoisomerase 2-beta OS=Homo sapiens OX=9606 GN=TOP2B PE=1 SV=3	T	NA	C#ITFQPDLSK	C#ITFQPDLSK	NA	1	1	NA	0.0288825	0.030667	2
P10768	56	ESD	ESD_C56	ESTD_HUMAN S-formylglutathione hydrolase OS=Homo sapiens OX=9606 GN=ESD PE=1 SV=2	T	NA	C#TEQNFISK	C#TEQNFISK	NA	1	1	NA	0.0290335	0.152722	2
O94804	888	STK10	STK10_C888	STK10_HUMAN Serine/threonine-protein kinase 10 OS=Homo sapiens OX=9606 GN=STK10 PE=1 SV=1	K	NA	C#HLLVEHETQK	C#HLLVEHETQK	NA	1	1	NA	0.0292696	0.00049728	2
P13639	651	EEF2	EEF2_C651	EF2_HUMAN Elongation factor 2 OS=Homo sapiens OX=9606 GN=EEF2 PE=1 SV=4	W	NA	C#FGPDGTGPNILTDITK	C#FGPDGTGPNILTDITK	NA	1	1	NA	0.0311354	0.0114525	2
Q00839	648	HNRNPU	HNRNPU_C648	HNRPU_HUMAN Heterogeneous nuclear ribonucleoprotein U OS=Homo sapiens OX=9606 GN=HNRNPU PE=1 SV=6	E	NA	C#FDEITYVELQK	C#FDEITYVELQK	NA	2	1	NA	0.0417129	0.0562519	2
P21333	1165	FLNA	FLNA_C1165	FLNA_HUMAN Filamin-A OS=Homo sapiens OX=9606 GN=FLNA PE=1 SV=4	K	NA	C#SGPGLER	C#SGPGLER	NA	1	1	NA	0.0360261	0.0263093	2
Q9Y6K9	76	IKBKG	IKBKG_C76	NEMO_HUMAN NF-kappa-B essential modulator OS=Homo sapiens OX=9606 GN=IKBKG PE=1 SV=2	R	NA	C#EELLHFQASQR	C#EELLHFQASQR	NA	1	1	NA	0.0395947	0.234524	2
Q96F86	47	EDC3	EDC3_C47	EDC3_HUMAN Enhancer of mRNA-decapping protein 3 OS=Homo sapiens OX=9606 GN=EDC3 PE=1 SV=1	K	NA	C#LVPEVTFR	C#LVPEVTFR	NA	1	2	NA	0.0420946	0.240113	2
Q5JSZ5	852	PRRC2B	PRRC2B_C852	PRC2B_HUMAN Protein PRRC2B OS=Homo sapiens OX=9606 GN=PRRC2B PE=1 SV=2	R	NA	C#SPLEPDFVPDEK	C#SPLEPDFVPDEK	NA	1	1	NA	0.0430945	0.0483648	2
P27708	868	CAD	CAD_C868	PYR1_HUMAN CAD protein OS=Homo sapiens OX=9606 GN=CAD PE=1 SV=3	K	NA	C#LGFSDK	C#LGFSDK	NA	1	1	NA	0.0443593	0.229406	2
P55210	70	CASP7	CASP7_C70	CASP7_HUMAN Caspase-7 OS=Homo sapiens OX=9606 GN=CASP7 PE=1 SV=1	K	NA	C#IIINNK	C#IIINNK	NA	1	1	NA	0.0509576	0.125098	2
P09211	48	GSTP1	GSTP1_C48	GSTP1_HUMAN Glutathione S-transferase P OS=Homo sapiens OX=9606 GN=GSTP1 PE=1 SV=2	S	NA	C#LYGQLPK	C#LYGQLPK	NA	2	1	NA	0.0750326	0.0604514	2
Q8IWZ3	181	ANKHD1	ANKHD1_C181	ANKH1_HUMAN Ankyrin repeat and KH domain-containing protein 1 OS=Homo sapiens OX=9606 GN=ANKHD1 PE=1 SV=1	S	NA	C#ALDEAAAALTR	C#ALDEAAAALTR	NA	1	1	NA	0.0550713	0.315614	2
Q7L2E3	346	DHX30	DHX30_C346	DHX30_HUMAN ATP-dependent RNA helicase DHX30 OS=Homo sapiens OX=9606 GN=DHX30 PE=1 SV=1	P	NA	C#TIQVPEPILR	C#TIQVPEPILR	NA	1	1	NA	0.0570756	0.259582	2
P56270	371	MAZ	MAZ_C371	MAZ_HUMAN Myc-associated zinc finger protein OS=Homo sapiens OX=9606 GN=MAZ PE=1 SV=1	K	NA	C#EAAFATK	C#EAAFATK	NA	2	2	NA	0.101793	0.0496999	2
P33992	207	MCM5	MCM5_C207	MCM5_HUMAN DNA replication licensing factor MCM5 OS=Homo sapiens OX=9606 GN=MCM5 PE=1 SV=5	K	NA	C#PLDPYFIMPDK	C#PLDPYFIMPDK	NA	2	2	NA	0.209204	0.00190481	2
P22314	1040	UBA1	UBA1_C1040	UBA1_HUMAN Ubiquitin-like modifier-activating enzyme 1 OS=Homo sapiens OX=9606 GN=UBA1 PE=1 SV=3	C	NA	C#NDESGEDVEVPYVR	C#NDESGEDVEVPYVR	NA	1	1	NA	0.0621325	0.127416	2
Q92973	620	TNPO1	TNPO1_C620	TNPO1_HUMAN Transportin-1 OS=Homo sapiens OX=9606 GN=TNPO1 PE=1 SV=2	R	NA	C#VNLVQK	C#VNLVQK	NA	2	2	NA	0.0797946	0.0941101	2
O60841	749	EIF5B	EIF5B_C749	IF2P_HUMAN Eukaryotic translation initiation factor 5B OS=Homo sapiens OX=9606 GN=EIF5B PE=1 SV=4	K	NA	C#PFIVALNK	C#PFIVALNK	NA	1	2	NA	0.0667051	0.145766	2
Q6PJG2	502	ELMSAN1	ELMSAN1_C502	EMSA1_HUMAN ELM2 and SANT domain-containing protein 1 OS=Homo sapiens OX=9606 GN=ELMSAN1 PE=1 SV=2	K	NA	C#GVEFSEPSLATK	C#GVEFSEPSLATK	NA	1	1	NA	0.0684612	0.204431	2
P08865	148	RPSA	RPSA_C148	RSSA_HUMAN 40S ribosomal protein SA OS=Homo sapiens OX=9606 GN=RPSA PE=1 SV=4	L	NA	C#NTDSPLR	C#NTDSPLR	NA	1	1	NA	0.0694402	0.15064	2
Q5SW79	967	CEP170	CEP170_C967	CE170_HUMAN Centrosomal protein of 170 kDa OS=Homo sapiens OX=9606 GN=CEP170 PE=1 SV=1	R	NA	C#STGSPSK	C#STGSPSK	NA	1	1	NA	0.0695178	0.15354	2
Q9BT22	396	ALG1	ALG1_C396	ALG1_HUMAN Chitobiosyldiphosphodolichol beta-mannosyltransferase OS=Homo sapiens OX=9606 GN=ALG1 PE=1 SV=2	K	NA	C#LHELVK	C#LHELVK	NA	1	1	NA	0.0721549	0.0878743	2
Q13617	721	CUL2	CUL2_C721	CUL2_HUMAN Cullin-2 OS=Homo sapiens OX=9606 GN=CUL2 PE=1 SV=2	K	NA	C#IEVLIDK	C#IEVLIDK	NA	1	1	NA	0.0782958	0.0575776	2
Q9BUK6	411	MSTO1	MSTO1_C411	MSTO1_HUMAN Protein misato homolog 1 OS=Homo sapiens OX=9606 GN=MSTO1 PE=1 SV=1	R	NA	C#FAQSVVLR	C#FAQSVVLR	NA	2	1	NA	0.0816467	0.182639	2
P54646	382	PRKAA2	PRKAA2_C382	AAPK2_HUMAN 5'-AMP-activated protein kinase catalytic subunit alpha-2 OS=Homo sapiens OX=9606 GN=PRKAA2 PE=1 SV=2	R	NA	C#PLDALNTTKPK	C#PLDALNTTKPK	NA	2	1	NA	0.136067	0.0193396	2
Q9H1P3	83	OSBPL2	OSBPL2_C83	OSBL2_HUMAN Oxysterol-binding protein-related protein 2 OS=Homo sapiens OX=9606 GN=OSBPL2 PE=1 SV=1	K	NA	C#VGLELSK	C#VGLELSK	NA	1	1	NA	0.0834446	0.0445704	2
O95235	763	KIF20A	KIF20A_C763	KI20A_HUMAN Kinesin-like protein KIF20A OS=Homo sapiens OX=9606 GN=KIF20A PE=1 SV=1	C	NA	C#HSTGAGK	C#HSTGAGK	NA	1	1	NA	0.0835724	0.278651	2
Q96L91	1820	EP400	EP400_C1820	EP400_HUMAN E1A-binding protein p400 OS=Homo sapiens OX=9606 GN=EP400 PE=1 SV=4	R	NA	C#GESLQDVIDR	C#GESLQDVIDR	NA	1	1	NA	0.0836758	0.222326	2
Q93074	83	MED12	MED12_C83	MED12_HUMAN Mediator of RNA polymerase II transcription subunit 12 OS=Homo sapiens OX=9606 GN=MED12 PE=1 SV=4	R	NA	C#NTLPDTGR	C#NTLPDTGR	NA	1	1	NA	0.0915637	0.0326998	2
P26583	106	HMGB2	HMGB2_C106	HMGB2_HUMAN High mobility group protein B2 OS=Homo sapiens OX=9606 GN=HMGB2 PE=1 SV=2	F	NA	C#SEHRPK	C#SEHRPK	NA	2	1	NA	0.179726	0.172068	2
O60216	392	RAD21	RAD21_C392	RAD21_HUMAN Double-strand-break repair protein rad21 homolog OS=Homo sapiens OX=9606 GN=RAD21 PE=1 SV=2	R	NA	C#LTPLVPEDLR	C#LTPLVPEDLR	NA	1	1	NA	0.0950876	0.0387766	2
Q8TCG1	337	CIP2A	CIP2A_C337	CIP2A_HUMAN Protein CIP2A OS=Homo sapiens OX=9606 GN=CIP2A PE=1 SV=2	K	NA	C#LEPTVALLR	C#LEPTVALLR	NA	1	1	NA	0.0965735	0.00404714	2
Q96GQ7	321	DDX27	DDX27_C321	DDX27_HUMAN Probable ATP-dependent RNA helicase DDX27 OS=Homo sapiens OX=9606 GN=DDX27 PE=1 SV=2	T	NA	C#LAVGGLDVK	C#LAVGGLDVK	NA	1	1	NA	0.101192	0.0857083	2
Q14738	410	PPP2R5D	PPP2R5D_C410	2A5D_HUMAN Serine/threonine-protein phosphatase 2A 56 kDa regulatory subunit delta isoform OS=Homo sapiens OX=9606 GN=PPP2R5D PE=1 SV=1	K	NA	C#VSSPHFQVAER	C#VSSPHFQVAER	NA	1	2	NA	0.109581	0.064322	2
P12277	74	CKB	CKB_C74	KCRB_HUMAN Creatine kinase B-type OS=Homo sapiens OX=9606 GN=CKB PE=1 SV=1	G	NA	C#VAGDEESYEVFK	C#VAGDEESYEVFK	NA	2	1	NA	0.134844	0.205196	2
O00571	223	DDX3X	DDX3X_C223	DDX3X_HUMAN ATP-dependent RNA helicase DDX3X OS=Homo sapiens OX=9606 GN=DDX3X PE=1 SV=3	A	NA	C#AQTGSGK	C#AQTGSGK	NA	1	1	NA	0.114621	0.0428408	2
Q9Y6Y8	604	SEC23IP	SEC23IP_C604	S23IP_HUMAN SEC23-interacting protein OS=Homo sapiens OX=9606 GN=SEC23IP PE=1 SV=1	K	NA	C#PGPLAVANGVVK	C#PGPLAVANGVVK	NA	1	2	NA	0.122294	0.0821448	2
O15173	159	PGRMC2	PGRMC2_C159	PGRC2_HUMAN Membrane-associated progesterone receptor component 2 OS=Homo sapiens OX=9606 GN=PGRMC2 PE=1 SV=1	F	NA	C#LDKDALR	C#LDKDALR	NA	1	1	NA	0.128338	0.137255	2
P36578	208	RPL4	RPL4_C208	RL4_HUMAN 60S ribosomal protein L4 OS=Homo sapiens OX=9606 GN=RPL4 PE=1 SV=5	P	NA	C#IIYNEDNGIIK	C#IIYNEDNGIIK	NA	1	2	NA	0.1293	0.147113	2
Q9H3H1	298	TRIT1	TRIT1_C298	MOD5_HUMAN tRNA dimethylallyltransferase OS=Homo sapiens OX=9606 GN=TRIT1 PE=1 SV=1	K	NA	C#TLETSNQLLK	C#TLETSNQLLK	NA	1	1	NA	0.130417	0.124289	2
O00571	468	DDX3X	DDX3X_C468	DDX3X_HUMAN ATP-dependent RNA helicase DDX3X OS=Homo sapiens OX=9606 GN=DDX3X PE=1 SV=3	A	NA	C#TSIHGDR	C#TSIHGDR	NA	1	1	NA	0.134858	0.365511	2
Q16513	131	PKN2	PKN2_C131	PKN2_HUMAN Serine/threonine-protein kinase N2 OS=Homo sapiens OX=9606 GN=PKN2 PE=1 SV=1	R	NA	C#STSNNR	C#STSNNR	NA	1	1	NA	0.135993	0.138912	2
Q04637	662	EIF4G1	EIF4G1_C662	IF4G1_HUMAN Eukaryotic translation initiation factor 4 gamma 1 OS=Homo sapiens OX=9606 GN=EIF4G1 PE=1 SV=4	N	NA	C#GPDFTPSFANLGR	C#GPDFTPSFANLGR	NA	1	1	NA	0.139823	0.140359	2
Q16204	27	CCDC6	CCDC6_C27	CCDC6_HUMAN Coiled-coil domain-containing protein 6 OS=Homo sapiens OX=9606 GN=CCDC6 PE=1 SV=2	S	NA	C#SSTSGGGGGGGGGGGGGK	C#SSTSGGGGGGGGGGGGGK	NA	1	1	NA	0.142872	0.00655038	2
P35250	270	RFC2	RFC2_C270	RFC2_HUMAN Replication factor C subunit 2 OS=Homo sapiens OX=9606 GN=RFC2 PE=1 SV=3	H	NA	C#VNANIDEAYK	C#VNANIDEAYK	NA	1	1	NA	0.144146	0.035072	2
O14802	961	POLR3A	POLR3A_C961	RPC1_HUMAN DNA-directed RNA polymerase III subunit RPC1 OS=Homo sapiens OX=9606 GN=POLR3A PE=1 SV=2	C	NA	C#QDSFLQEIK	C#QDSFLQEIK	NA	1	1	NA	0.1462	0.226847	2
P00367	327	GLUD1	GLUD1_C327	DHE3_HUMAN Glutamate dehydrogenase 1, mitochondrial OS=Homo sapiens OX=9606 GN=GLUD1 PE=1 SV=2	K	NA	C#IAVGESDGSIWNPDGIDPK	C#IAVGESDGSIWNPDGIDPK	NA	1	1	NA	0.149711	0.0458275	2
Q9H0C8	190	ILKAP	ILKAP_C190	ILKAP_HUMAN Integrin-linked kinase-associated serine/threonine phosphatase 2C OS=Homo sapiens OX=9606 GN=ILKAP PE=1 SV=1	R	NA	C#LLDTFK	C#LLDTFK	NA	1	1	NA	0.151367	0.0743791	2
P15924	367	DSP	DSP_C367	DESP_HUMAN Desmoplakin OS=Homo sapiens OX=9606 GN=DSP PE=1 SV=3	K	NA	C#IDVHLK	C#IDVHLK	NA	1	3	NA	0.153397	0.321075	2
O15382	342	BCAT2	BCAT2_C342	BCAT2_HUMAN Branched-chain-amino-acid aminotransferase, mitochondrial OS=Homo sapiens OX=9606 GN=BCAT2 PE=1 SV=2	A	NA	C#QVCPVHR	C#QVCPVHR	NA	1	1	NA	0.157799	0.116294	2
Q13616	752	CUL1	CUL1_C752	CUL1_HUMAN Cullin-1 OS=Homo sapiens OX=9606 GN=CUL1 PE=1 SV=2	K	NA	C#IDILIEK	C#IDILIEK	NA	1	1	NA	0.157957	0.17348	2
Q7L576	1241	CYFIP1	CYFIP1_C1241	CYFP1_HUMAN Cytoplasmic FMR1-interacting protein 1 OS=Homo sapiens OX=9606 GN=CYFIP1 PE=1 SV=1	R	NA	C#FQPPIHQSLASS	C#FQPPIHQSLASS	NA	1	1	NA	0.160446	0.00726079	2
Q9BXJ9	322	NAA15	NAA15_C322	NAA15_HUMAN N-alpha-acetyltransferase 15, NatA auxiliary subunit OS=Homo sapiens OX=9606 GN=NAA15 PE=1 SV=1	G	NA	C#PPVFNTLR	C#PPVFNTLR	NA	1	1	NA	0.162732	0.146293	2
Q9NSD9	548	FARSB	FARSB_C548	SYFB_HUMAN Phenylalanine--tRNA ligase beta subunit OS=Homo sapiens OX=9606 GN=FARSB PE=1 SV=3	R	NA	C#AEIFAR	C#AEIFAR	NA	1	2	NA	0.165685	0.0924586	2
O14980	34	XPO1	XPO1_C34	XPO1_HUMAN Exportin-1 OS=Homo sapiens OX=9606 GN=XPO1 PE=1 SV=1	N	NA	C#LYHGEGAQQR	C#LYHGEGAQQR	NA	1	1	NA	0.167001	0.0164842	2
Q14974	455	KPNB1	KPNB1_C455	IMB1_HUMAN Importin subunit beta-1 OS=Homo sapiens OX=9606 GN=KPNB1 PE=1 SV=2	Q	NA	C#LIEGLSAEPR	C#LIEGLSAEPR	NA	1	1	NA	0.174154	0.195604	2
P60891	41	PRPS1	PRPS1_C41	PRPS1_HUMAN Ribose-phosphate pyrophosphokinase 1 OS=Homo sapiens OX=9606 GN=PRPS1 PE=1 SV=2	T	NA	C#VEIGESVR	C#VEIGESVR	NA	1	1	NA	0.174728	0.38837	2
Q9BTT0	123	ANP32E	ANP32E_C123	AN32E_HUMAN Acidic leucine-rich nuclear phosphoprotein 32 family member E OS=Homo sapiens OX=9606 GN=ANP32E PE=1 SV=1	N	NA	C#EITNLEDYR	C#EITNLEDYR	NA	1	1	NA	0.176156	0.0409112	2
Q9UI30	33	TRMT112	TRMT112_C33	TR112_HUMAN Multifunctional methyltransferase subunit TRM112-like protein OS=Homo sapiens OX=9606 GN=TRMT112 PE=1 SV=1	I	NA	C#PVEFNPNFVAR	C#PVEFNPNFVAR	NA	1	1	NA	0.179865	0.204403	2
Q96SN8	528	CDK5RAP2	CDK5RAP2_C528	CK5P2_HUMAN CDK5 regulatory subunit-associated protein 2 OS=Homo sapiens OX=9606 GN=CDK5RAP2 PE=1 SV=5	K	NA	C#SSQQPPGSK	C#SSQQPPGSK	NA	1	1	NA	0.182317	0.280296	2
Q9NXV2	28	KCTD5	KCTD5_C28	KCTD5_HUMAN BTB/POZ domain-containing protein KCTD5 OS=Homo sapiens OX=9606 GN=KCTD5 PE=1 SV=1	R	NA	C#SAGLGALAQR	C#SAGLGALAQRPGSVSK C#SAGLGALAQR	NA	1	2	NA	0.182718	0.0100836	2
O75116	804	ROCK2	ROCK2_C804	ROCK2_HUMAN Rho-associated protein kinase 2 OS=Homo sapiens OX=9606 GN=ROCK2 PE=1 SV=4	R	NA	C#LTQNDLK	C#LTQNDLK	NA	1	1	NA	0.184482	0.0888652	2
Q00765	18	REEP5	REEP5_C18	REEP5_HUMAN Receptor expression-enhancing protein 5 OS=Homo sapiens OX=9606 GN=REEP5 PE=1 SV=3	N	NA	C#MTDLLAK	C#MTDLLAK	NA	1	1	NA	0.186517	0.197044	2
P45880	76	VDAC2	VDAC2_C76	VDAC2_HUMAN Voltage-dependent anion-selective channel protein 2 OS=Homo sapiens OX=9606 GN=VDAC2 PE=1 SV=2	W	NA	C#EYGLTFTEK	C#EYGLTFTEK	NA	2	2	NA	0.234	0.128905	2
O15550	79	KDM6A	KDM6A_C79	KDM6A_HUMAN Lysine-specific demethylase 6A OS=Homo sapiens OX=9606 GN=KDM6A PE=1 SV=2	R	NA	C#YESLILK	C#YESLILK	NA	1	1	NA	0.191223	0.18773	2
Q86TU7	36	SETD3	SETD3_C36	SETD3_HUMAN Actin-histidine N-methyltransferase OS=Homo sapiens OX=9606 GN=SETD3 PE=1 SV=1	K	NA	C#SSPAPGPGK	C#SSPAPGPGK	NA	1	2	NA	0.192298	0.16394	2
Q7L2J0	54	MEPCE	MEPCE_C54	MEPCE_HUMAN 7SK snRNA methylphosphate capping enzyme OS=Homo sapiens OX=9606 GN=MEPCE PE=1 SV=1	R	NA	C#APSAGSPAAAVGR	C#APSAGSPAAAVGR	NA	1	1	NA	0.193256	0.0484044	2
P07814	744	EPRS	EPRS_C744	SYEP_HUMAN Bifunctional glutamate/proline--tRNA ligase OS=Homo sapiens OX=9606 GN=EPRS PE=1 SV=5	N	NA	C#TTSEDSLVLYNR	C#TTSEDSLVLYNR	NA	1	1	NA	0.193716	0.00747239	2
O75794	212	CDC123	CDC123_C212	CD123_HUMAN Cell division cycle protein 123 homolog OS=Homo sapiens OX=9606 GN=CDC123 PE=1 SV=1	R	NA	C#IQDFFK	C#IQDFFK	NA	1	1	NA	0.195275	0.0727672	2
Q99460	104	PSMD1	PSMD1_C104	PSMD1_HUMAN 26S proteasome non-ATPase regulatory subunit 1 OS=Homo sapiens OX=9606 GN=PSMD1 PE=1 SV=2	K	NA	C#IDHYTK	C#IDHYTK	NA	1	2	NA	0.19624	0.089063	2
Q96PZ0	443	PUS7	PUS7_C443	PUS7_HUMAN Pseudouridylate synthase 7 homolog OS=Homo sapiens OX=9606 GN=PUS7 PE=1 SV=2	R	NA	C#VEGQLLR	C#VEGQLLR	NA	1	1	NA	0.196837	0.0991147	2
Q00839	497	HNRNPU	HNRNPU_C497	HNRPU_HUMAN Heterogeneous nuclear ribonucleoprotein U OS=Homo sapiens OX=9606 GN=HNRNPU PE=1 SV=6	D	NA	C#EVVMMIGLPGAGK	C#EVVMMIGLPGAGK	NA	1	1	NA	0.199296	0.00881978	2
Q15075	346	EEA1	EEA1_C346	EEA1_HUMAN Early endosome antigen 1 OS=Homo sapiens OX=9606 GN=EEA1 PE=1 SV=2	D	NA	C#QQLQSR	C#QQLQSR	NA	1	1	NA	0.199373	0.258765	2
P46060	82	RANGAP1	RANGAP1_C82	RAGP1_HUMAN Ran GTPase-activating protein 1 OS=Homo sapiens OX=9606 GN=RANGAP1 PE=1 SV=1	R	NA	C#HWSDMFTGR	C#HWSDMFTGR	NA	1	5	NA	0.201219	0.0906718	2
Q9UPW6	219	SATB2	SATB2_C219	SATB2_HUMAN DNA-binding protein SATB2 OS=Homo sapiens OX=9606 GN=SATB2 PE=1 SV=2	K	NA	C#QEFGR	C#QEFGR	NA	1	1	NA	0.210271	0.279883	2
Q86VP6	1007	CAND1	CAND1_C1007	CAND1_HUMAN Cullin-associated NEDD8-dissociated protein 1 OS=Homo sapiens OX=9606 GN=CAND1 PE=1 SV=2	N	NA	C#IGDFLK	C#IGDFLK	NA	1	1	NA	0.211185	0.300454	2
Q15393	547	SF3B3	SF3B3_C547	SF3B3_HUMAN Splicing factor 3B subunit 3 OS=Homo sapiens OX=9606 GN=SF3B3 PE=1 SV=4	K	NA	C#AVNQR	C#AVNQR	NA	1	1	NA	0.21502	0.240235	2
P49915	554	GMPS	GMPS_C554	GUAA_HUMAN GMP synthase [glutamine-hydrolyzing] OS=Homo sapiens OX=9606 GN=GMPS PE=1 SV=1	M	NA	C#HNVNR	C#HNVNR	NA	2	1	NA	0.293273	0.157721	2
Q9H9B1	553	EHMT1	EHMT1_C553	EHMT1_HUMAN Histone-lysine N-methyltransferase EHMT1 OS=Homo sapiens OX=9606 GN=EHMT1 PE=1 SV=4	R	NA	C#TNSVVK	C#TNSVVK	NA	1	1	NA	0.217076	0.0451459	2
O00541	153	PES1	PES1_C153	PESC_HUMAN Pescadillo homolog OS=Homo sapiens OX=9606 GN=PES1 PE=1 SV=1	K	NA	C#HVQTIQLCR	C#HVQTIQLCR	NA	2	2	NA	0.270119	0.25751	2
Q6P158	199	DHX57	DHX57_C199	DHX57_HUMAN Putative ATP-dependent RNA helicase DHX57 OS=Homo sapiens OX=9606 GN=DHX57 PE=1 SV=2	R	NA	C#QAVLR	C#QAVLR	NA	1	1	NA	0.240219	0.293767	2
Q15269	158	PWP2	PWP2_C158	PWP2_HUMAN Periodic tryptophan protein 2 homolog OS=Homo sapiens OX=9606 GN=PWP2 PE=2 SV=2	R	NA	C#FVVGSK	C#FVVGSK	NA	1	1	NA	0.24228	0.121344	2
O60566	700	BUB1B	BUB1B_C700	BUB1B_HUMAN Mitotic checkpoint serine/threonine-protein kinase BUB1 beta OS=Homo sapiens OX=9606 GN=BUB1B PE=1 SV=3	K	NA	C#LQIPEK	C#LQIPEK	NA	1	1	NA	0.242645	0.18699	2
Q86VP6	71	CAND1	CAND1_C71	CAND1_HUMAN Cullin-associated NEDD8-dissociated protein 1 OS=Homo sapiens OX=9606 GN=CAND1 PE=1 SV=2	K	NA	C#LGPLVSK	C#LGPLVSK	NA	2	1	NA	0.259083	0.0226457	2
O94826	442	TOMM70	TOMM70_C442	TOM70_HUMAN Mitochondrial import receptor subunit TOM70 OS=Homo sapiens OX=9606 GN=TOMM70 PE=1 SV=1	K	NA	C#FALYR	C#FALYR	NA	2	2	NA	0.309845	0.249928	2
P35520	370	CBS	CBS_C370	CBS_HUMAN Cystathionine beta-synthase OS=Homo sapiens OX=9606 GN=CBS PE=1 SV=2	R	NA	C#VVILPDSVR	C#VVILPDSVR	NA	1	1	NA	0.252606	0.0315357	2
P49327	779	FASN	FASN_C779	FAS_HUMAN Fatty acid synthase OS=Homo sapiens OX=9606 GN=FASN PE=1 SV=3	S	NA	C#TIIPLMK	C#TIIPLMK	NA	1	1	NA	0.261932	0.187885	2
Q05048	296	CSTF1	CSTF1_C296	CSTF1_HUMAN Cleavage stimulation factor subunit 1 OS=Homo sapiens OX=9606 GN=CSTF1 PE=1 SV=1	R	NA	C#ITTFEK	C#ITTFEK	NA	2	1	NA	0.282745	0.0993212	2
P62633	119	CNBP	CNBP_C119	CNBP_HUMAN Cellular nucleic acid-binding protein OS=Homo sapiens OX=9606 GN=CNBP PE=1 SV=1	K	NA	C#YSCGEFGHIQK	C#YSCGEFGHIQK	NA	1	2	NA	0.267326	0.0378118	2
P42858	1961	HTT	HTT_C1961	HD_HUMAN Huntingtin OS=Homo sapiens OX=9606 GN=HTT PE=1 SV=2	R	NA	C#ENLSTPTMLK	C#ENLSTPTMLK	NA	1	3	NA	0.270533	0.308716	2
P46777	100	RPL5	RPL5_C100	RL5_HUMAN 60S ribosomal protein L5 OS=Homo sapiens OX=9606 GN=RPL5 PE=1 SV=3	Y	NA	C#TGLLLAR	C#TGLLLAR	NA	1	1	NA	0.273255	0.131566	2
Q1KMD3	538	HNRNPUL2	HNRNPUL2_C538	HNRL2_HUMAN Heterogeneous nuclear ribonucleoprotein U-like protein 2 OS=Homo sapiens OX=9606 GN=HNRNPUL2 PE=1 SV=1	Q	NA	C#NVYNSGQR	C#NVYNSGQR	NA	1	1	NA	0.27343	0.116019	2
P51610	326	HCFC1	HCFC1_C326	HCFC1_HUMAN Host cell factor 1 OS=Homo sapiens OX=9606 GN=HCFC1 PE=1 SV=2	H	NA	C#AVAINTR	C#AVAINTR	NA	1	2	NA	0.274853	0.236588	2
Q5J8M3	69	EMC4	EMC4_C69	EMC4_HUMAN ER membrane protein complex subunit 4 OS=Homo sapiens OX=9606 GN=EMC4 PE=1 SV=2	R	NA	C#WDIALGPLK	C#WDIALGPLK	NA	1	1	NA	0.276829	0.20346	2
P54136	34	RARS	RARS_C34	SYRC_HUMAN Arginine--tRNA ligase, cytoplasmic OS=Homo sapiens OX=9606 GN=RARS PE=1 SV=2	G	NA	C#LGASPNLEQLQEENLK	C#LGASPNLEQLQEENLK	NA	1	2	NA	0.277403	0.0038073	2
P78316	580	NOP14	NOP14_C580	NOP14_HUMAN Nucleolar protein 14 OS=Homo sapiens OX=9606 GN=NOP14 PE=1 SV=3	K	NA	C#PILSLQDVVK	C#PILSLQDVVK	NA	1	1	NA	0.277607	0.00231139	2
O75533	1035	SF3B1	SF3B1_C1035	SF3B1_HUMAN Splicing factor 3B subunit 1 OS=Homo sapiens OX=9606 GN=SF3B1 PE=1 SV=3	N	NA	C#IDLVGR	C#IDLVGR	NA	1	1	NA	0.278559	0.390954	2
Q9H3G5	320	CPVL	CPVL_C320	CPVL_HUMAN Probable serine carboxypeptidase CPVL OS=Homo sapiens OX=9606 GN=CPVL PE=1 SV=2	R	NA	C#TEPEDQLYYVK	C#TEPEDQLYYVK	NA	1	1	NA	0.282842	0.0484334	2
Q9UIA9	47	XPO7	XPO7_C47	XPO7_HUMAN Exportin-7 OS=Homo sapiens OX=9606 GN=XPO7 PE=1 SV=3	K	NA	C#QLLLER	C#QLLLER	NA	1	1	NA	0.284187	0.105779	2
Q9UN37	60	VPS4A	VPS4A_C60	VPS4A_HUMAN Vacuolar protein sorting-associated protein 4A OS=Homo sapiens OX=9606 GN=VPS4A PE=1 SV=1	K	NA	C#VQYLDR	C#VQYLDR	NA	1	1	NA	0.284195	0.105022	2
Q96F86	91	EDC3	EDC3_C91	EDC3_HUMAN Enhancer of mRNA-decapping protein 3 OS=Homo sapiens OX=9606 GN=EDC3 PE=1 SV=1	G	NA	C#QVGINQNGTGK	C#QVGINQNGTGK	NA	1	1	NA	0.290799	0.222352	2
P46087	487	NOP2	NOP2_C487	NOP2_HUMAN Probable 28S rRNA (cytosine(4447)-C(5))-methyltransferase OS=Homo sapiens OX=9606 GN=NOP2 PE=1 SV=2	R	NA	C#AHLQK	C#AHLQK	NA	1	1	NA	0.294872	0.213992	2
P25205	134	MCM3	MCM3_C134	MCM3_HUMAN DNA replication licensing factor MCM3 OS=Homo sapiens OX=9606 GN=MCM3 PE=1 SV=3	K	NA	C#SLVRPK	C#SLVRPK	NA	1	2	NA	0.295204	0.167915	2
Q5VT66	273	2019-03-01	43525_C273	MARC1_HUMAN Mitochondrial amidoxime-reducing component 1 OS=Homo sapiens OX=9606 GN=MARC1 PE=1 SV=1	R	NA	C#ILTTVDPDTGVMSR	C#ILTTVDPDTGVMSR	NA	1	1	NA	0.299105	0.0673071	2
Q9P2J5	92	LARS	LARS_C92	SYLC_HUMAN Leucine--tRNA ligase, cytoplasmic OS=Homo sapiens OX=9606 GN=LARS PE=1 SV=2	H	NA	C#TGMPIK	C#TGMPIK	NA	1	1	NA	0.300602	0.218261	2
O95260	79	ATE1	ATE1_C79	ATE1_HUMAN Arginyl-tRNA--protein transferase 1 OS=Homo sapiens OX=9606 GN=ATE1 PE=1 SV=2	R	NA	C#RPLQFQPSK	C#RPLQFQPSK	NA	1	1	NA	0.305808	0.116239	2
P35606	351	COPB2	COPB2_C351	COPB2_HUMAN Coatomer subunit beta' OS=Homo sapiens OX=9606 GN=COPB2 PE=1 SV=2	S	NA	C#EIYPQTIQHNPNGR	C#EIYPQTIQHNPNGR	NA	1	1	NA	0.305958	0.152543	2
Q9C0C9	353	UBE2O	UBE2O_C353	UBE2O_HUMAN (E3-independent) E2 ubiquitin-conjugating enzyme OS=Homo sapiens OX=9606 GN=UBE2O PE=1 SV=3	R	NA	C#LYVFPAK	C#LYVFPAK	NA	1	1	NA	0.307988	0.102965	2
P11717	1957	IGF2R	IGF2R_C1957	MPRI_HUMAN Cation-independent mannose-6-phosphate receptor OS=Homo sapiens OX=9606 GN=IGF2R PE=1 SV=3	K	NA	C#DEDEDIGRPQVFSEVR	C#DEDEDIGRPQVFSEVR	NA	1	1	NA	0.312414	0.187925	2
P28370	1016	SMARCA1	SMARCA1_C1016	SMCA1_HUMAN Probable global transcription activator SNF2L1 OS=Homo sapiens OX=9606 GN=SMARCA1 PE=1 SV=2	R	NA	C#NTLISLIEK	C#NTLISLIEK	NA	1	1	NA	0.325641	0.0376516	2
P49368	455	CCT3	CCT3_C455	TCPG_HUMAN T-complex protein 1 subunit gamma OS=Homo sapiens OX=9606 GN=CCT3 PE=1 SV=4	N	NA	C#GASTIR	C#GASTIR	NA	1	1	NA	0.326349	0.395974	2
P61927	37	RPL37	RPL37_C37	RL37_HUMAN 60S ribosomal protein L37 OS=Homo sapiens OX=9606 GN=RPL37 PE=1 SV=2	K	NA	C#GYPAK	C#GYPAK	NA	1	1	NA	0.326619	0.101131	2
Q7Z3K3	380	POGZ	POGZ_C380	POGZ_HUMAN Pogo transposable element with ZNF domain OS=Homo sapiens OX=9606 GN=POGZ PE=1 SV=2	R	NA	C#NAQFR	C#NAQFR	NA	1	1	NA	0.327464	0.214379	2
Q9C0C2	136	TNKS1BP1	TNKS1BP1_C136	TB182_HUMAN 182 kDa tankyrase-1-binding protein OS=Homo sapiens OX=9606 GN=TNKS1BP1 PE=1 SV=4	R	NA	C#AAPGGVR	C#AAPGGVR	NA	1	1	NA	0.329774	0.0878399	2
P49915	213	GMPS	GMPS_C213	GUAA_HUMAN GMP synthase [glutamine-hydrolyzing] OS=Homo sapiens OX=9606 GN=GMPS PE=1 SV=1	G	NA	C#SGTFTVQNR	C#SGTFTVQNR	NA	1	1	NA	0.340348	0.253063	2
O43257	140	ZNHIT1	ZNHIT1_C140	ZNHI1_HUMAN Zinc finger HIT domain-containing protein 1 OS=Homo sapiens OX=9606 GN=ZNHIT1 PE=1 SV=1	R	NA	C#LGTHQETR	C#LGTHQETR	NA	2	1	NA	0.369448	0.164555	2
Q13200	251	PSMD2	PSMD2_C251	PSMD2_HUMAN 26S proteasome non-ATPase regulatory subunit 2 OS=Homo sapiens OX=9606 GN=PSMD2 PE=1 SV=3	R	NA	C#ALGVFR	C#ALGVFR	NA	1	2	NA	0.345546	0.251974	2
Q13907	86	IDI1	IDI1_C86	IDI1_HUMAN Isopentenyl-diphosphate Delta-isomerase 1 OS=Homo sapiens OX=9606 GN=IDI1 PE=1 SV=2	C	NA	C#SHPLSNPAELEESDALGVR	C#SHPLSNPAELEESDALGVR	NA	1	2	NA	0.358028	0.0387856	2
Q5VTL8	29	PRPF38B	PRPF38B_C29	PR38B_HUMAN Pre-mRNA-splicing factor 38B OS=Homo sapiens OX=9606 GN=PRPF38B PE=1 SV=1	Q	NA	C#GGGGATKPAVSGK	C#GGGGATKPAVSGK	NA	1	1	NA	0.361516	0.0264336	2
O14979	277	HNRNPDL	HNRNPDL_C277	HNRDL_HUMAN Heterogeneous nuclear ribonucleoprotein D-like OS=Homo sapiens OX=9606 GN=HNRNPDL PE=1 SV=3	F	NA	C#FITYTDEEPVKK	C#FITYTDEEPVKK	NA	1	1	NA	0.368269	0.304993	2
Q7Z5G4	24	GOLGA7	GOLGA7_C24	GOGA7_HUMAN Golgin subfamily A member 7 OS=Homo sapiens OX=9606 GN=GOLGA7 PE=1 SV=2	R	NA	C#QFQTK	C#QFQTK	NA	1	1	NA	0.388921	0.317634	2
P62979	149	RPS27A	RPS27A_C149	RS27A_HUMAN Ubiquitin-40S ribosomal protein S27a OS=Homo sapiens OX=9606 GN=RPS27A PE=1 SV=2	Y	NA	C#FNKPEDK	C#FNKPEDK	NA	1	1	NA	0.391857	0.0803538	2
P68104	31	EEF1A1	EEF1A1_C31	EF1A1_HUMAN Elongation factor 1-alpha 1 OS=Homo sapiens OX=9606 GN=EEF1A1 PE=1 SV=1	K	NA	C#GGIDKR	C#GGIDKR	NA	1	2	NA	0.397534	0.165482	2
O14787	609	TNPO2	TNPO2_C609	TNPO2_HUMAN Transportin-2 OS=Homo sapiens OX=9606 GN=TNPO2 PE=1 SV=3	R	NA	C#VTLVQK	C#VTLVQK	NA	1	1	NA	0.397608	0.206119	2
Q9C0C9	182	UBE2O	UBE2O_C182	UBE2O_HUMAN (E3-independent) E2 ubiquitin-conjugating enzyme OS=Homo sapiens OX=9606 GN=UBE2O PE=1 SV=3	N	NA	C#IIYPVNSK	C#IIYPVNSK	NA	1	1	NA	0.399869	0.275585	2
Q96QE3	909	ATAD5	ATAD5_C909	ATAD5_HUMAN ATPase family AAA domain-containing protein 5 OS=Homo sapiens OX=9606 GN=ATAD5 PE=1 SV=4	K	NA	C#GIALGEFSTLNSK	C#GIALGEFSTLNSK	NA	1	1	NA	0.399882	0.17656	2
O60306	1245	AQR	AQR_C1245	AQR_HUMAN RNA helicase aquarius OS=Homo sapiens OX=9606 GN=AQR PE=1 SV=4	R	NA	C#GNNPLIGRPNK	C#GNNPLIGRPNK	NA	1	1	NA	0.40043	0.109817	2
O15347	104	HMGB3	HMGB3_C104	HMGB3_HUMAN High mobility group protein B3 OS=Homo sapiens OX=9606 GN=HMGB3 PE=1 SV=4	F	NA	C#SEFRPK	C#SEFRPK	NA	1	1	NA	0.403668	0.355127	2
Q9Y277	65	VDAC3	VDAC3_C65	VDAC3_HUMAN Voltage-dependent anion-selective channel protein 3 OS=Homo sapiens OX=9606 GN=VDAC3 PE=1 SV=1	V	NA	C#NYGLTFTQK	C#NYGLTFTQK	NA	1	1	NA	0.406043	0.16722	2
Q96L58	32	B3GALT6	B3GALT6_C32	B3GT6_HUMAN Beta-1,3-galactosyltransferase 6 OS=Homo sapiens OX=9606 GN=B3GALT6 PE=1 SV=2	R	C#AAEPGDPR	NA	NA	1	NA	NA	0.294282	NA	NA	1
O95376	280	ARIH2	ARIH2_C280	ARI2_HUMAN E3 ubiquitin-protein ligase ARIH2 OS=Homo sapiens OX=9606 GN=ARIH2 PE=1 SV=1	K	C#ADDSETANYISAHTK	NA	NA	1	NA	NA	0.0457912	NA	NA	1
P62829	28	RPL23	RPL23_C28	RL23_HUMAN 60S ribosomal protein L23 OS=Homo sapiens OX=9606 GN=RPL23 PE=1 SV=1	N	C#ADNTGAK	NA	NA	1	NA	NA	0.290377	NA	NA	1
Q9Y462	542	ZNF711	ZNF711_C542	ZN711_HUMAN Zinc finger protein 711 OS=Homo sapiens OX=9606 GN=ZNF711 PE=1 SV=2	R	C#ADQSNLK	NA	NA	1	NA	NA	0.110914	NA	NA	1
Q92878	133	RAD50	RAD50_C133	RAD50_HUMAN DNA repair protein RAD50 OS=Homo sapiens OX=9606 GN=RAD50 PE=1 SV=1	K	C#AEIDR	NA	NA	1	NA	NA	0.306836	NA	NA	1
Q13948	421	CUX1	CUX1_C421	CASP_HUMAN Protein CASP OS=Homo sapiens OX=9606 GN=CUX1 PE=1 SV=2	R	C#AELQVR	NA	NA	1	NA	NA	0.181629	NA	NA	1
P46013	3229	MKI67	MKI67_C3229	KI67_HUMAN Proliferation marker protein Ki-67 OS=Homo sapiens OX=9606 GN=MKI67 PE=1 SV=2	R	C#AENPK	NA	NA	1	NA	NA	0.251359	NA	NA	1
Q5SRE5	285	NUP188	NUP188_C285	NU188_HUMAN Nucleoporin NUP188 homolog OS=Homo sapiens OX=9606 GN=NUP188 PE=1 SV=1	K	C#ALDDR	NA	NA	1	NA	NA	0.124937	NA	NA	1
Q8TEQ0	121	SNX29	SNX29_C121	SNX29_HUMAN Sorting nexin-29 OS=Homo sapiens OX=9606 GN=SNX29 PE=1 SV=3	R	C#ALNEHSLER	NA	NA	1	NA	NA	0.284857	NA	NA	1
Q3KQU3	382	MAP7D1	MAP7D1_C382	MA7D1_HUMAN MAP7 domain-containing protein 1 OS=Homo sapiens OX=9606 GN=MAP7D1 PE=1 SV=1	R	C#APAGER	NA	NA	1	NA	NA	0.369888	NA	NA	1
O15523	221	DDX3Y	DDX3Y_C221	DDX3Y_HUMAN ATP-dependent RNA helicase DDX3Y OS=Homo sapiens OX=9606 GN=DDX3Y PE=1 SV=2	A	C#AQTGSGK	NA	NA	1	NA	NA	0.2972	NA	NA	1
Q92830	817	KAT2A	KAT2A_C817	KAT2A_HUMAN Histone acetyltransferase KAT2A OS=Homo sapiens OX=9606 GN=KAT2A PE=1 SV=3	R	C#ASALEK	NA	NA	1	NA	NA	0.186166	NA	NA	1
P48735	113	IDH2	IDH2_C113	IDHP_HUMAN Isocitrate dehydrogenase [NADP], mitochondrial OS=Homo sapiens OX=9606 GN=IDH2 PE=1 SV=2	K	C#ATITPDEAR	NA	NA	1	NA	NA	0.00985971	NA	NA	1
Q8IVT5	62	KSR1	KSR1_C62	KSR1_HUMAN Kinase suppressor of Ras 1 OS=Homo sapiens OX=9606 GN=KSR1 PE=1 SV=3	K	C#AVSNDLTQQEIR	NA	NA	1	NA	NA	0.00578923	NA	NA	1
O94826	588	TOMM70	TOMM70_C588	TOM70_HUMAN Mitochondrial import receptor subunit TOM70 OS=Homo sapiens OX=9606 GN=TOMM70 PE=1 SV=1	L	C#DAAHAQTEVAK	NA	NA	1	NA	NA	0.0039653	NA	NA	1
O43237	234	DYNC1LI2	DYNC1LI2_C234	DC1L2_HUMAN Cytoplasmic dynein 1 light intermediate chain 2 OS=Homo sapiens OX=9606 GN=DYNC1LI2 PE=1 SV=1	K	C#DAVSVLEK	NA	NA	1	NA	NA	0.0939936	NA	NA	1
Q92841	431	DDX17	DDX17_C431	DDX17_HUMAN Probable ATP-dependent RNA helicase DDX17 OS=Homo sapiens OX=9606 GN=DDX17 PE=1 SV=2	R	C#DDLTR	NA	NA	2	NA	NA	0.29778	NA	NA	1
P29590	227	PML	PML_C227	PML_HUMAN Protein PML OS=Homo sapiens OX=9606 GN=PML PE=1 SV=3	K	C#DISAEIQQR	NA	NA	1	NA	NA	0.0146192	NA	NA	1
Q8NB78	465	KDM1B	KDM1B_C465	KDM1B_HUMAN Lysine-specific histone demethylase 1B OS=Homo sapiens OX=9606 GN=KDM1B PE=1 SV=3	R	C#DLIQEGGR	NA	NA	1	NA	NA	0.13505	NA	NA	1
O43149	2553	ZZEF1	ZZEF1_C2553	ZZEF1_HUMAN Zinc finger ZZ-type and EF-hand domain-containing protein 1 OS=Homo sapiens OX=9606 GN=ZZEF1 PE=1 SV=6	R	C#DQATAESNPVTQK	NA	NA	1	NA	NA	0.258763	NA	NA	1
Q9NYF8	688	BCLAF1	BCLAF1_C688	BCLF1_HUMAN Bcl-2-associated transcription factor 1 OS=Homo sapiens OX=9606 GN=BCLAF1 PE=1 SV=2	R	C#DSADLR	NA	NA	1	NA	NA	0.128247	NA	NA	1
Q5T160	74	RARS2	RARS2_C74	SYRM_HUMAN Probable arginine--tRNA ligase, mitochondrial OS=Homo sapiens OX=9606 GN=RARS2 PE=1 SV=1	R	C#DTVVSEISTGQR	NA	NA	1	NA	NA	0.0029165	NA	NA	1
Q08379	356	GOLGA2	GOLGA2_C356	GOGA2_HUMAN Golgin subfamily A member 2 OS=Homo sapiens OX=9606 GN=GOLGA2 PE=1 SV=3	R	C#EAPDANQQLQQAMEER	NA	NA	1	NA	NA	0.0355688	NA	NA	1
O43542	221	XRCC3	XRCC3_C221	XRCC3_HUMAN DNA repair protein XRCC3 OS=Homo sapiens OX=9606 GN=XRCC3 PE=1 SV=1	R	C#EFDSQASAPR	NA	NA	1	NA	NA	0.2827	NA	NA	1
Q96T17	278	MAP7D2	MAP7D2_C278	MA7D2_HUMAN MAP7 domain-containing protein 2 OS=Homo sapiens OX=9606 GN=MAP7D2 PE=1 SV=2	R	C#EFSGGIPK	NA	NA	1	NA	NA	0.276456	NA	NA	1
Q92973	153	TNPO1	TNPO1_C153	TNPO1_HUMAN Transportin-1 OS=Homo sapiens OX=9606 GN=TNPO1 PE=1 SV=2	T	C#EGAFGALQK	NA	NA	1	NA	NA	0.141102	NA	NA	1
Q9Y3P9	250	RABGAP1	RABGAP1_C250	RBGP1_HUMAN Rab GTPase-activating protein 1 OS=Homo sapiens OX=9606 GN=RABGAP1 PE=1 SV=3	R	C#EIQEAVSR	NA	NA	1	NA	NA	0.183187	NA	NA	1
Q7Z417	234	NUFIP2	NUFIP2_C234	NUFP2_HUMAN Nuclear fragile X mental retardation-interacting protein 2 OS=Homo sapiens OX=9606 GN=NUFIP2 PE=1 SV=1	G	C#ENLNIVQDK	NA	NA	1	NA	NA	0.0913219	NA	NA	1
P23396	134	RPS3	RPS3_C134	RS3_HUMAN 40S ribosomal protein S3 OS=Homo sapiens OX=9606 GN=RPS3 PE=1 SV=2	G	C#EVVVSGK	NA	NA	1	NA	NA	0.309764	NA	NA	1
P22102	93	GART	GART_C93	PUR2_HUMAN Trifunctional purine biosynthetic protein adenosine-3 OS=Homo sapiens OX=9606 GN=GART PE=1 SV=1	Q	C#FGPTAEAAQLESSK	NA	NA	1	NA	NA	0.343478	NA	NA	1
Q9H9A7	268	RMI1	RMI1_C268	RMI1_HUMAN RecQ-mediated genome instability protein 1 OS=Homo sapiens OX=9606 GN=RMI1 PE=1 SV=3	R	C#FTTGSSSNTIPTR	NA	NA	1	NA	NA	0.301665	NA	NA	1
P82933	233	MRPS9	MRPS9_C233	RT09_HUMAN 28S ribosomal protein S9, mitochondrial OS=Homo sapiens OX=9606 GN=MRPS9 PE=1 SV=2	Q	C#GAAEEEFVQR	NA	NA	1	NA	NA	0.191288	NA	NA	1
Q96GX9	16	APIP	APIP_C16	MTNB_HUMAN Methylthioribulose-1-phosphate dehydratase OS=Homo sapiens OX=9606 GN=APIP PE=1 SV=1	R	C#GAQDKEHPR	NA	NA	1	NA	NA	0.135714	NA	NA	1
O95163	453	ELP1	ELP1_C453	ELP1_HUMAN Elongator complex protein 1 OS=Homo sapiens OX=9606 GN=ELP1 PE=1 SV=3	K	C#GDCPSADPTVK	NA	NA	1	NA	NA	0.194812	NA	NA	1
P48556	112	PSMD8	PSMD8_C112	PSMD8_HUMAN 26S proteasome non-ATPase regulatory subunit 8 OS=Homo sapiens OX=9606 GN=PSMD8 PE=1 SV=2	K	C#GEELGR	NA	NA	1	NA	NA	0.0941222	NA	NA	1
O94829	848	IPO13	IPO13_C848	IPO13_HUMAN Importin-13 OS=Homo sapiens OX=9606 GN=IPO13 PE=1 SV=3	R	C#GEVESVGK	NA	NA	1	NA	NA	0.0131597	NA	NA	1
A2RRP1	1453	NBAS	NBAS_C1453	NBAS_HUMAN Neuroblastoma-amplified sequence OS=Homo sapiens OX=9606 GN=NBAS PE=1 SV=2	K	C#GGAYQIGTTANEDLEK	NA	NA	1	NA	NA	0.00663467	NA	NA	1
Q9NQX0	150	PRDM6	PRDM6_C150	PRDM6_HUMAN Putative histone-lysine N-methyltransferase PRDM6 OS=Homo sapiens OX=9606 GN=PRDM6 PE=1 SV=2	K	C#GGGGGGGGEGR	NA	NA	1	NA	NA	0.220326	NA	NA	1
Q99873	33	PRMT1	PRMT1_C33	ANM1_HUMAN Protein arginine N-methyltransferase 1 OS=Homo sapiens OX=9606 GN=PRMT1 PE=1 SV=3	S	C#GQAESSEKPNAEDMTSK	NA	NA	1	NA	NA	0.277467	NA	NA	1
O95613	321	PCNT	PCNT_C321	PCNT_HUMAN Pericentrin OS=Homo sapiens OX=9606 GN=PCNT PE=1 SV=4	R	C#GQEAAELK	NA	NA	1	NA	NA	0.297743	NA	NA	1
Q9Y217	383	MTMR6	MTMR6_C383	MTMR6_HUMAN Myotubularin-related protein 6 OS=Homo sapiens OX=9606 GN=MTMR6 PE=1 SV=3	R	C#GQLDGDPK	NA	NA	1	NA	NA	0.0929977	NA	NA	1
Q8IWS0	28	PHF6	PHF6_C28	PHF6_HUMAN PHD finger protein 6 OS=Homo sapiens OX=9606 GN=PHF6 PE=1 SV=1	E	C#GQLLISENQK	NA	NA	1	NA	NA	0.101118	NA	NA	1
Q02543	64	RPL18A	RPL18A_C64	RL18A_HUMAN 60S ribosomal protein L18a OS=Homo sapiens OX=9606 GN=RPL18A PE=1 SV=2	Y	C#GQVFEK	NA	NA	1	NA	NA	0.353961	NA	NA	1
Q15365	109	PCBP1	PCBP1_C109	PCBP1_HUMAN Poly(rC)-binding protein 1 OS=Homo sapiens OX=9606 GN=PCBP1 PE=1 SV=2	Q	C#GSLIGK	NA	NA	1	NA	NA	0.192611	NA	NA	1
O43896	229	KIF1C	KIF1C_C229	KIF1C_HUMAN Kinesin-like protein KIF1C OS=Homo sapiens OX=9606 GN=KIF1C PE=1 SV=3	R	C#HDQLTGLDSEK	NA	NA	1	NA	NA	0.31629	NA	NA	1
O15523	315	DDX3Y	DDX3Y_C315	DDX3Y_HUMAN ATP-dependent RNA helicase DDX3Y OS=Homo sapiens OX=9606 GN=DDX3Y PE=1 SV=2	G	C#HLLVATPGR	NA	NA	1	NA	NA	0.347604	NA	NA	1
Q96TC7	128	RMDN3	RMDN3_C128	RMD3_HUMAN Regulator of microtubule dynamics protein 3 OS=Homo sapiens OX=9606 GN=RMDN3 PE=1 SV=2	R	C#HMEENQR	NA	NA	1	NA	NA	0.238253	NA	NA	1
Q7Z7H8	180	MRPL10	MRPL10_C180	RM10_HUMAN 39S ribosomal protein L10, mitochondrial OS=Homo sapiens OX=9606 GN=MRPL10 PE=1 SV=3	G	C#IDDTILSR	NA	NA	1	NA	NA	0.381115	NA	NA	1
O00159	625	MYO1C	MYO1C_C625	MYO1C_HUMAN Unconventional myosin-Ic OS=Homo sapiens OX=9606 GN=MYO1C PE=1 SV=4	R	C#IKPNDAK	NA	NA	1	NA	NA	0.0844234	NA	NA	1
O00410	972	IPO5	IPO5_C972	IPO5_HUMAN Importin-5 OS=Homo sapiens OX=9606 GN=IPO5 PE=1 SV=4	N	C#ISAVGK	NA	NA	1	NA	NA	0.352203	NA	NA	1
P78527	1904	PRKDC	PRKDC_C1904	PRKDC_HUMAN DNA-dependent protein kinase catalytic subunit OS=Homo sapiens OX=9606 GN=PRKDC PE=1 SV=3	S	C#ITEGNELTK	NA	NA	1	NA	NA	0.0844551	NA	NA	1
Q7Z406	695	MYH14	MYH14_C695	MYH14_HUMAN Myosin-14 OS=Homo sapiens OX=9606 GN=MYH14 PE=1 SV=2	R	C#IVPNHEK	NA	NA	1	NA	NA	0.0802519	NA	NA	1
P21359	93	NF1	NF1_C93	NF1_HUMAN Neurofibromin OS=Homo sapiens OX=9606 GN=NF1 PE=1 SV=2	K	C#LAGQPK	NA	NA	1	NA	NA	0.351485	NA	NA	1
Q99460	141	PSMD1	PSMD1_C141	PSMD1_HUMAN 26S proteasome non-ATPase regulatory subunit 1 OS=Homo sapiens OX=9606 GN=PSMD1 PE=1 SV=2	R	C#LDDHK	NA	NA	1	NA	NA	0.142664	NA	NA	1
A0A0U1RR11	225	CENPVL1	CENPVL1_C225	CENL1_HUMAN Centromere protein V-like protein 1 OS=Homo sapiens OX=9606 GN=CENPVL1 PE=2 SV=1	H	C#LDEGTVR	NA	NA	1	NA	NA	0.171224	NA	NA	1
P15924	1499	DSP	DSP_C1499	DESP_HUMAN Desmoplakin OS=Homo sapiens OX=9606 GN=DSP PE=1 SV=3	K	C#LEDENAR	NA	NA	1	NA	NA	0.282994	NA	NA	1
Q9Y6K9	54	IKBKG	IKBKG_C54	NEMO_HUMAN NF-kappa-B essential modulator OS=Homo sapiens OX=9606 GN=IKBKG PE=1 SV=2	R	C#LEENQELR	NA	NA	1	NA	NA	0.181897	NA	NA	1
P38606	394	ATP6V1A	ATP6V1A_C394	VATA_HUMAN V-type proton ATPase catalytic subunit A OS=Homo sapiens OX=9606 GN=ATP6V1A PE=1 SV=2	K	C#LGNPER	NA	NA	1	NA	NA	0.157662	NA	NA	1
Q96RU2	952	USP28	USP28_C952	UBP28_HUMAN Ubiquitin carboxyl-terminal hydrolase 28 OS=Homo sapiens OX=9606 GN=USP28 PE=1 SV=1	K	C#LLELNAK	NA	NA	1	NA	NA	0.0822441	NA	NA	1
Q9UGU0	1163	TCF20	TCF20_C1163	TCF20_HUMAN Transcription factor 20 OS=Homo sapiens OX=9606 GN=TCF20 PE=1 SV=3	R	C#LMSSDGLPNK	NA	NA	1	NA	NA	0.353174	NA	NA	1
Q08999	368	RBL2	RBL2_C368	RBL2_HUMAN Retinoblastoma-like protein 2 OS=Homo sapiens OX=9606 GN=RBL2 PE=1 SV=3	R	C#LNAGSGTETAER	NA	NA	1	NA	NA	0.118634	NA	NA	1
Q9BTE3	602	MCMBP	MCMBP_C602	MCMBP_HUMAN Mini-chromosome maintenance complex-binding protein OS=Homo sapiens OX=9606 GN=MCMBP PE=1 SV=2	R	C#LSLSAGQTTLSR	NA	NA	1	NA	NA	0.310672	NA	NA	1
O43929	16	ORC4	ORC4_C16	ORC4_HUMAN Origin recognition complex subunit 4 OS=Homo sapiens OX=9606 GN=ORC4 PE=1 SV=2	E	C#LSQVQR	NA	NA	1	NA	NA	0.36637	NA	NA	1
Q7L1I2	141	SV2B	SV2B_C141	SV2B_HUMAN Synaptic vesicle glycoprotein 2B OS=Homo sapiens OX=9606 GN=SV2B PE=1 SV=1	M	C#LSSSK	NA	NA	1	NA	NA	0.303237	NA	NA	1
Q96EK7	246	FAM120B	FAM120B_C246	F120B_HUMAN Constitutive coactivator of peroxisome proliferator-activated receptor gamma OS=Homo sapiens OX=9606 GN=FAM120B PE=1 SV=1	K	C#LSSYTSVK	NA	NA	1	NA	NA	0.313889	NA	NA	1
P50748	390	KNTC1	KNTC1_C390	KNTC1_HUMAN Kinetochore-associated protein 1 OS=Homo sapiens OX=9606 GN=KNTC1 PE=1 SV=1	R	C#LTEALPENR	NA	NA	1	NA	NA	0.0784627	NA	NA	1
Q86UP2	1105	KTN1	KTN1_C1105	KTN1_HUMAN Kinectin OS=Homo sapiens OX=9606 GN=KTN1 PE=1 SV=1	E	C#MAGTSGSEEVK	NA	NA	1	NA	NA	0.0774442	NA	NA	1
Q12756	356	KIF1A	KIF1A_C356	KIF1A_HUMAN Kinesin-like protein KIF1A OS=Homo sapiens OX=9606 GN=KIF1A PE=1 SV=2	R	C#NAVINEDPNNK	NA	NA	1	NA	NA	0.0031956	NA	NA	1
O60264	891	SMARCA5	SMARCA5_C891	SMCA5_HUMAN SWI/SNF-related matrix-associated actin-dependent regulator of chromatin subfamily A member 5 OS=Homo sapiens OX=9606 GN=SMARCA5 PE=1 SV=1	R	C#NELQDIEK	NA	NA	2	NA	NA	0.0884274	NA	NA	1
Q8N108	263	MIER1	MIER1_C263	MIER1_HUMAN Mesoderm induction early response protein 1 OS=Homo sapiens OX=9606 GN=MIER1 PE=1 SV=2	K	C#NFDTEEALR	NA	NA	1	NA	NA	0.368771	NA	NA	1
Q9BZ95	495	NSD3	NSD3_C495	NSD3_HUMAN Histone-lysine N-methyltransferase NSD3 OS=Homo sapiens OX=9606 GN=NSD3 PE=1 SV=1	K	C#NMSPVVK	NA	NA	1	NA	NA	0.156139	NA	NA	1
Q92526	233	CCT6B	CCT6B_C233	TCPW_HUMAN T-complex protein 1 subunit zeta-2 OS=Homo sapiens OX=9606 GN=CCT6B PE=1 SV=5	I	C#NVSLEYEK	NA	NA	1	NA	NA	0.122574	NA	NA	1
Q7Z2W4	96	ZC3HAV1	ZC3HAV1_C96	ZCCHV_HUMAN Zinc finger CCCH-type antiviral protein 1 OS=Homo sapiens OX=9606 GN=ZC3HAV1 PE=1 SV=3	R	C#NYSQSER	NA	NA	1	NA	NA	0.341948	NA	NA	1
Q9P0K7	110	RAI14	RAI14_C110	RAI14_HUMAN Ankycorbin OS=Homo sapiens OX=9606 GN=RAI14 PE=1 SV=2	K	C#PAESVDSSGK	NA	NA	1	NA	NA	0.0093698	NA	NA	1
Q9UPZ6	752	THSD7A	THSD7A_C752	THS7A_HUMAN Thrombospondin type-1 domain-containing protein 7A OS=Homo sapiens OX=9606 GN=THSD7A PE=1 SV=4	K	C#PESIR	NA	NA	1	NA	NA	0.312553	NA	NA	1
Q08211	1029	DHX9	DHX9_C1029	DHX9_HUMAN ATP-dependent RNA helicase A OS=Homo sapiens OX=9606 GN=DHX9 PE=1 SV=4	N	C#PFSSQDMK	NA	NA	1	NA	NA	0.347161	NA	NA	1
Q92667	376	AKAP1	AKAP1_C376	AKAP1_HUMAN A-kinase anchor protein 1, mitochondrial OS=Homo sapiens OX=9606 GN=AKAP1 PE=1 SV=1	V	C#QASQLQGQK	NA	NA	1	NA	NA	0.11232	NA	NA	1
Q6P1R4	312	DUS1L	DUS1L_C312	DUS1L_HUMAN tRNA-dihydrouridine(16/17) synthase [NAD(P)(+)]-like OS=Homo sapiens OX=9606 GN=DUS1L PE=1 SV=1	R	C#QEEISR	NA	NA	1	NA	NA	0.0985971	NA	NA	1
P07814	1377	EPRS	EPRS_C1377	SYEP_HUMAN Bifunctional glutamate/proline--tRNA ligase OS=Homo sapiens OX=9606 GN=EPRS PE=1 SV=5	S	C#QFVAVR	NA	NA	1	NA	NA	0.356971	NA	NA	1
Q96RR1	226	TWNK	TWNK_C226	PEO1_HUMAN Twinkle protein, mitochondrial OS=Homo sapiens OX=9606 GN=TWNK PE=1 SV=1	K	C#QGDGVSYEETTIPR	NA	NA	1	NA	NA	0.180986	NA	NA	1
Q9C0D5	1808	TANC1	TANC1_C1808	TANC1_HUMAN Protein TANC1 OS=Homo sapiens OX=9606 GN=TANC1 PE=1 SV=3	K	C#QIPVHSQENR	NA	NA	1	NA	NA	0.0517659	NA	NA	1
Q9Y6K9	131	IKBKG	IKBKG_C131	NEMO_HUMAN NF-kappa-B essential modulator OS=Homo sapiens OX=9606 GN=IKBKG PE=1 SV=2	R	C#QQQMAEDK	NA	NA	2	NA	NA	0.254798	NA	NA	1
Q9Y6N1	121	COX11	COX11_C121	COX11_HUMAN Cytochrome c oxidase assembly protein COX11, mitochondrial OS=Homo sapiens OX=9606 GN=COX11 PE=1 SV=3	Y	C#QTTGLGGSAVAGHASDK	NA	NA	1	NA	NA	0.174504	NA	NA	1
A6NHR9	1656	SMCHD1	SMCHD1_C1656	SMHD1_HUMAN Structural maintenance of chromosomes flexible hinge domain-containing protein 1 OS=Homo sapiens OX=9606 GN=SMCHD1 PE=1 SV=2	K	C#QVEEAR	NA	NA	1	NA	NA	0.332198	NA	NA	1
Q9NQW6	978	ANLN	ANLN_C978	ANLN_HUMAN Anillin OS=Homo sapiens OX=9606 GN=ANLN PE=1 SV=2	K	C#QVNSSVEER	NA	NA	1	NA	NA	0.173229	NA	NA	1
O15254	550	ACOX3	ACOX3_C550	ACOX3_HUMAN Peroxisomal acyl-coenzyme A oxidase 3 OS=Homo sapiens OX=9606 GN=ACOX3 PE=1 SV=2	K	C#QVSHGR	NA	NA	1	NA	NA	0.255757	NA	NA	1
Q96PZ0	421	PUS7	PUS7_C421	PUS7_HUMAN Pseudouridylate synthase 7 homolog OS=Homo sapiens OX=9606 GN=PUS7 PE=1 SV=2	K	C#REEWAK	NA	NA	1	NA	NA	0.373223	NA	NA	1
Q6YHU6	1148	THADA	THADA_C1148	THADA_HUMAN Thyroid adenoma-associated protein OS=Homo sapiens OX=9606 GN=THADA PE=1 SV=1	K	C#SDPSSK	NA	NA	1	NA	NA	0.283093	NA	NA	1
Q14527	360	HLTF	HLTF_C360	HLTF_HUMAN Helicase-like transcription factor OS=Homo sapiens OX=9606 GN=HLTF PE=1 SV=2	R	C#SEQPSISDIK	NA	NA	2	NA	NA	0.0498226	NA	NA	1
P78345	80	RPP38	RPP38_C80	RPP38_HUMAN Ribonuclease P protein subunit p38 OS=Homo sapiens OX=9606 GN=RPP38 PE=1 SV=2	K	C#SIAVDISENLK	NA	NA	1	NA	NA	0.0119283	NA	NA	1
P54136	369	RARS	RARS_C369	SYRC_HUMAN Arginine--tRNA ligase, cytoplasmic OS=Homo sapiens OX=9606 GN=RARS PE=1 SV=2	G	C#SIPLTIVK	NA	NA	1	NA	NA	0.209694	NA	NA	1
Q9H4L7	106	SMARCAD1	SMARCAD1_C106	SMRCD_HUMAN SWI/SNF-related matrix-associated actin-dependent regulator of chromatin subfamily A containing DEAD/H box 1 OS=Homo sapiens OX=9606 GN=SMARCAD1 PE=1 SV=2	N	C#SNTVQEK	NA	NA	1	NA	NA	0.305458	NA	NA	1
Q9P0K8	42	FOXJ2	FOXJ2_C42	FOXJ2_HUMAN Forkhead box protein J2 OS=Homo sapiens OX=9606 GN=FOXJ2 PE=1 SV=1	K	C#SPGSPTDPNATLSK	NA	NA	1	NA	NA	0.159527	NA	NA	1
Q8WUY9	59	DEPDC1B	DEPDC1B_C59	DEP1B_HUMAN DEP domain-containing protein 1B OS=Homo sapiens OX=9606 GN=DEPDC1B PE=1 SV=2	R	C#SQNFGPEVTR	NA	NA	1	NA	NA	0.110975	NA	NA	1
P78527	3014	PRKDC	PRKDC_C3014	PRKDC_HUMAN DNA-dependent protein kinase catalytic subunit OS=Homo sapiens OX=9606 GN=PRKDC PE=1 SV=3	Y	C#STASIDSENPPDLNK	NA	NA	1	NA	NA	0.253597	NA	NA	1
P49790	404	NUP153	NUP153_C404	NU153_HUMAN Nuclear pore complex protein Nup153 OS=Homo sapiens OX=9606 GN=NUP153 PE=1 SV=2	K	C#STGYEK	NA	NA	1	NA	NA	0.0831872	NA	NA	1
P09874	256	PARP1	PARP1_C256	PARP1_HUMAN Poly [ADP-ribose] polymerase 1 OS=Homo sapiens OX=9606 GN=PARP1 PE=1 SV=4	V	C#STNDLK	NA	NA	1	NA	NA	0.253803	NA	NA	1
O95297	203	MPZL1	MPZL1_C203	MPZL1_HUMAN Myelin protein zero-like protein 1 OS=Homo sapiens OX=9606 GN=MPZL1 PE=1 SV=1	G	C#STSESLSPVK	NA	NA	1	NA	NA	0.10545	NA	NA	1
P47712	726	PLA2G4A	PLA2G4A_C726	PA24A_HUMAN Cytosolic phospholipase A2 OS=Homo sapiens OX=9606 GN=PLA2G4A PE=1 SV=2	R	C#SVSLSNVEAR	NA	NA	1	NA	NA	0.150314	NA	NA	1
Q3SXM5	265	HSDL1	HSDL1_C265	HSDL1_HUMAN Inactive hydroxysteroid dehydrogenase-like protein 1 OS=Homo sapiens OX=9606 GN=HSDL1 PE=1 SV=3	R	C#SWLVPSPK	NA	NA	1	NA	NA	0.239763	NA	NA	1
P52948	1312	NUP98	NUP98_C1312	NUP98_HUMAN Nuclear pore complex protein Nup98-Nup96 OS=Homo sapiens OX=9606 GN=NUP98 PE=1 SV=4	S	C#TATPQIEEEVSLTQK	NA	NA	1	NA	NA	0.309574	NA	NA	1
Q7Z3D4	174	LYSMD3	LYSMD3_C174	LYSM3_HUMAN LysM and putative peptidoglycan-binding domain-containing protein 3 OS=Homo sapiens OX=9606 GN=LYSMD3 PE=1 SV=2	K	C#TDNKR	NA	NA	1	NA	NA	0.313608	NA	NA	1
Q92879	119	CELF1	CELF1_C119	CELF1_HUMAN CUGBP Elav-like family member 1 OS=Homo sapiens OX=9606 GN=CELF1 PE=1 SV=2	K	C#TENDIR	NA	NA	1	NA	NA	0.138019	NA	NA	1
Q9H8V3	308	ECT2	ECT2_C308	ECT2_HUMAN Protein ECT2 OS=Homo sapiens OX=9606 GN=ECT2 PE=1 SV=4	R	C#THLVVEENIVK	NA	NA	1	NA	NA	0.00686521	NA	NA	1
Q96FV9	49	THOC1	THOC1_C49	THOC1_HUMAN THO complex subunit 1 OS=Homo sapiens OX=9606 GN=THOC1 PE=1 SV=1	K	C#TLDQAFR	NA	NA	1	NA	NA	0.0510365	NA	NA	1
P16615	344	ATP2A2	ATP2A2_C344	AT2A2_HUMAN Sarcoplasmic/endoplasmic reticulum calcium ATPase 2 OS=Homo sapiens OX=9606 GN=ATP2A2 PE=1 SV=1	G	C#TSVICSDK	NA	NA	1	NA	NA	0.171314	NA	NA	1
Q9NRL3	337	STRN4	STRN4_C337	STRN4_HUMAN Striatin-4 OS=Homo sapiens OX=9606 GN=STRN4 PE=1 SV=2	R	C#TVDGSPHELESR	NA	NA	1	NA	NA	0.090157	NA	NA	1
Q13363	38	CTBP1	CTBP1_C38	CTBP1_HUMAN C-terminal-binding protein 1 OS=Homo sapiens OX=9606 GN=CTBP1 PE=1 SV=2	D	C#TVEMPILK	NA	NA	1	NA	NA	0.134156	NA	NA	1
Q14687	777	GSE1	GSE1_C777	GSE1_HUMAN Genetic suppressor element 1 OS=Homo sapiens OX=9606 GN=GSE1 PE=1 SV=3	R	C#VAEQPPLK	NA	NA	1	NA	NA	0.100037	NA	NA	1
Q14566	302	MCM6	MCM6_C302	MCM6_HUMAN DNA replication licensing factor MCM6 OS=Homo sapiens OX=9606 GN=MCM6 PE=1 SV=1	C	C#VAPTNPR	NA	NA	1	NA	NA	0.331943	NA	NA	1
Q9Y223	453	GNE	GNE_C453	GLCNE_HUMAN Bifunctional UDP-N-acetylglucosamine 2-epimerase/N-acetylmannosamine kinase OS=Homo sapiens OX=9606 GN=GNE PE=1 SV=1	M	C#VEAAAEAVK	NA	NA	1	NA	NA	0.143828	NA	NA	1
O75600	404	GCAT	GCAT_C404	KBL_HUMAN 2-amino-3-ketobutyrate coenzyme A ligase, mitochondrial OS=Homo sapiens OX=9606 GN=GCAT PE=1 SV=1	R	C#VEAFVEVGR	NA	NA	1	NA	NA	0.126955	NA	NA	1
Q15149	3667	PLEC	PLEC_C3667	PLEC_HUMAN Plectin OS=Homo sapiens OX=9606 GN=PLEC PE=1 SV=3	R	C#VEDPETGLR	NA	NA	2	NA	NA	0.326477	NA	NA	1
P48735	402	IDH2	IDH2_C402	IDHP_HUMAN Isocitrate dehydrogenase [NADP], mitochondrial OS=Homo sapiens OX=9606 GN=IDH2 PE=1 SV=2	V	C#VETVESGAMTK	NA	NA	1	NA	NA	0.133067	NA	NA	1
Q99714	58	HSD17B10	HSD17B10_C58	HCD2_HUMAN 3-hydroxyacyl-CoA dehydrogenase type-2 OS=Homo sapiens OX=9606 GN=HSD17B10 PE=1 SV=3	N	C#VFAPADVTSEK	NA	NA	1	NA	NA	0.338025	NA	NA	1
P52948	1476	NUP98	NUP98_C1476	NUP98_HUMAN Nuclear pore complex protein Nup98-Nup96 OS=Homo sapiens OX=9606 GN=NUP98 PE=1 SV=4	G	C#VIAEEQNSQTPLR	NA	NA	1	NA	NA	0.262571	NA	NA	1
Q9BSD7	110	NTPCR	NTPCR_C110	NTPCR_HUMAN Cancer-related nucleoside-triphosphatase OS=Homo sapiens OX=9606 GN=NTPCR PE=1 SV=1	V	C#VIDEIGK	NA	NA	1	NA	NA	0.25543	NA	NA	1
Q8TD26	594	CHD6	CHD6_C594	CHD6_HUMAN Chromodomain-helicase-DNA-binding protein 6 OS=Homo sapiens OX=9606 GN=CHD6 PE=1 SV=4	S	C#VIIDEAHR	NA	NA	1	NA	NA	0.381741	NA	NA	1
Q5T9A4	492	ATAD3B	ATAD3B_C492	ATD3B_HUMAN ATPase family AAA domain-containing protein 3B OS=Homo sapiens OX=9606 GN=ATAD3B PE=1 SV=1	N	C#VLKPATEGK	NA	NA	1	NA	NA	0.190902	NA	NA	1
P43246	199	MSH2	MSH2_C199	MSH2_HUMAN DNA mismatch repair protein Msh2 OS=Homo sapiens OX=9606 GN=MSH2 PE=1 SV=1	E	C#VLPGGETAGDMGK	NA	NA	1	NA	NA	0.254972	NA	NA	1
Q96I24	125	FUBP3	FUBP3_C125	FUBP3_HUMAN Far upstream element-binding protein 3 OS=Homo sapiens OX=9606 GN=FUBP3 PE=1 SV=2	P	C#VLTGTPESIEQAK	NA	NA	1	NA	NA	0.283402	NA	NA	1
Q149N8	688	SHPRH	SHPRH_C688	SHPRH_HUMAN E3 ubiquitin-protein ligase SHPRH OS=Homo sapiens OX=9606 GN=SHPRH PE=1 SV=2	K	C#VNYDEK	NA	NA	1	NA	NA	0.372766	NA	NA	1
P14543	839	NID1	NID1_C839	NID1_HUMAN Nidogen-1 OS=Homo sapiens OX=9606 GN=NID1 PE=1 SV=3	R	C#VPGEVEK	NA	NA	2	NA	NA	0.377043	NA	NA	1
Q14573	36	ITPR3	ITPR3_C36	ITPR3_HUMAN Inositol 1,4,5-trisphosphate receptor type 3 OS=Homo sapiens OX=9606 GN=ITPR3 PE=1 SV=2	R	C#VVEPAAGDLDNPPKK	NA	NA	1	NA	NA	0.366519	NA	NA	1
Q15477	579	SKIV2L	SKIV2L_C579	SKIV2_HUMAN Helicase SKI2W OS=Homo sapiens OX=9606 GN=SKIV2L PE=1 SV=3	R	NA	C#DEQASGLTSLDLTTSSEK	NA	NA	1	NA	NA	0.000694059	NA	1
P62424	199	RPL7A	RPL7A_C199	RL7A_HUMAN 60S ribosomal protein L7a OS=Homo sapiens OX=9606 GN=RPL7A PE=1 SV=2	T	NA	C#TTVAFTQVNSEDK	NA	NA	1	NA	NA	0.00124626	NA	1
Q8WV74	71	NUDT8	NUDT8_C71	NUDT8_HUMAN Nucleoside diphosphate-linked moiety X motif 8 OS=Homo sapiens OX=9606 GN=NUDT8 PE=1 SV=2	K	NA	C#DPADQDVVHTALR	NA	NA	1	NA	NA	0.0024765	NA	1
O75116	247	ROCK2	ROCK2_C247	ROCK2_HUMAN Rho-associated protein kinase 2 OS=Homo sapiens OX=9606 GN=ROCK2 PE=1 SV=4	H	NA	C#DTAVGTPDYISPEVLK	NA	NA	1	NA	NA	0.00543379	NA	1
Q99439	175	CNN2	CNN2_C175	CNN2_HUMAN Calponin-2 OS=Homo sapiens OX=9606 GN=CNN2 PE=1 SV=4	K	NA	C#ASQSGMTAYGTR	NA	NA	2	NA	NA	0.0133122	NA	1
P60891	265	PRPS1	PRPS1_C265	PRPS1_HUMAN Ribose-phosphate pyrophosphokinase 1 OS=Homo sapiens OX=9606 GN=PRPS1 PE=1 SV=2	A	NA	C#FEAVVVTNTIPQEDK	NA	NA	1	NA	NA	0.00617624	NA	1
P82675	377	MRPS5	MRPS5_C377	RT05_HUMAN 28S ribosomal protein S5, mitochondrial OS=Homo sapiens OX=9606 GN=MRPS5 PE=1 SV=2	E	NA	C#GPLPIVVASPR	NA	NA	1	NA	NA	0.0105415	NA	1
Q9NR30	682	DDX21	DDX21_C682	DDX21_HUMAN Nucleolar RNA helicase 2 OS=Homo sapiens OX=9606 GN=DDX21 PE=1 SV=5	V	NA	C#FDVPTASVTEIQEK	NA	NA	1	NA	NA	0.0137316	NA	1
P36542	103	ATP5F1C	ATP5F1C_C103	ATPG_HUMAN ATP synthase subunit gamma, mitochondrial OS=Homo sapiens OX=9606 GN=ATP5F1C PE=1 SV=1	L	NA	C#GAIHSSIAK	NA	NA	1	NA	NA	0.0151248	NA	1
O43175	254	PHGDH	PHGDH_C254	SERA_HUMAN D-3-phosphoglycerate dehydrogenase OS=Homo sapiens OX=9606 GN=PHGDH PE=1 SV=4	Q	NA	C#AGAALDVFTEEPPR	NA	NA	1	NA	NA	0.0161191	NA	1
Q9UBU9	588	NXF1	NXF1_C588	NXF1_HUMAN Nuclear RNA export factor 1 OS=Homo sapiens OX=9606 GN=NXF1 PE=1 SV=1	K	NA	C#LQDNNWDYTR	NA	NA	1	NA	NA	0.0166756	NA	1
P62826	112	RAN	RAN_C112	RAN_HUMAN GTP-binding nuclear protein Ran OS=Homo sapiens OX=9606 GN=RAN PE=1 SV=3	V	NA	C#ENIPIVLCGNK	NA	NA	1	NA	NA	0.0223409	NA	1
Q9NZI7	69	UBP1	UBP1_C69	UBIP1_HUMAN Upstream-binding protein 1 OS=Homo sapiens OX=9606 GN=UBP1 PE=1 SV=1	M	NA	C#AATSPAVK	NA	NA	1	NA	NA	0.023787	NA	1
Q86W42	279	THOC6	THOC6_C279	THOC6_HUMAN THO complex subunit 6 homolog OS=Homo sapiens OX=9606 GN=THOC6 PE=1 SV=1	R	NA	C#VNQWQLSGELK	NA	NA	1	NA	NA	0.0241218	NA	1
Q9BYP7	278	WNK3	WNK3_C278	WNK3_HUMAN Serine/threonine-protein kinase WNK3 OS=Homo sapiens OX=9606 GN=WNK3 PE=1 SV=3	K	NA	C#DNIFITGPTGSVK	NA	NA	1	NA	NA	0.0270673	NA	1
O75643	1278	SNRNP200	SNRNP200_C1278	U520_HUMAN U5 small nuclear ribonucleoprotein 200 kDa helicase OS=Homo sapiens OX=9606 GN=SNRNP200 PE=1 SV=2	S	NA	C#ETQLPVSFR	NA	NA	1	NA	NA	0.0276669	NA	1
Q92552	49	MRPS27	MRPS27_C49	RT27_HUMAN 28S ribosomal protein S27, mitochondrial OS=Homo sapiens OX=9606 GN=MRPS27 PE=1 SV=3	Y	NA	C#LADLASLMDK	NA	NA	1	NA	NA	0.0308199	NA	1
Q9NP92	316	MRPS30	MRPS30_C316	RT30_HUMAN 39S ribosomal protein S30, mitochondrial OS=Homo sapiens OX=9606 GN=MRPS30 PE=1 SV=2	N	NA	C#ADQIEVVFR	NA	NA	1	NA	NA	0.0336442	NA	1
P12277	283	CKB	CKB_C283	KCRB_HUMAN Creatine kinase B-type OS=Homo sapiens OX=9606 GN=CKB PE=1 SV=1	T	NA	C#PSNLGTGLR	NA	NA	1	NA	NA	0.036976	NA	1
Q9H832	154	UBE2Z	UBE2Z_C154	UBE2Z_HUMAN Ubiquitin-conjugating enzyme E2 Z OS=Homo sapiens OX=9606 GN=UBE2Z PE=1 SV=2	R	NA	C#PPDYPIHPPR	NA	NA	2	NA	NA	0.075925	NA	1
Q96EP5	63	DAZAP1	DAZAP1_C63	DAZP1_HUMAN DAZ-associated protein 1 OS=Homo sapiens OX=9606 GN=DAZAP1 PE=1 SV=1	N	NA	C#VGTVLASR	NA	NA	1	NA	NA	0.0448613	NA	1
P54577	442	YARS	YARS_C442	SYYC_HUMAN Tyrosine--tRNA ligase, cytoplasmic OS=Homo sapiens OX=9606 GN=YARS PE=1 SV=4	L	NA	C#ASIEGINR	NA	NA	1	NA	NA	0.0452516	NA	1
O95793	523	STAU1	STAU1_C523	STAU1_HUMAN Double-stranded RNA-binding protein Staufen homolog 1 OS=Homo sapiens OX=9606 GN=STAU1 PE=1 SV=2	N	NA	C#SSQPPLISHGIGK	NA	NA	1	NA	NA	0.0501541	NA	1
O60264	1001	SMARCA5	SMARCA5_C1001	SMCA5_HUMAN SWI/SNF-related matrix-associated actin-dependent regulator of chromatin subfamily A member 5 OS=Homo sapiens OX=9606 GN=SMARCA5 PE=1 SV=1	R	NA	C#NTLITLIER	NA	NA	1	NA	NA	0.0515655	NA	1
P22314	278	UBA1	UBA1_C278	UBA1_HUMAN Ubiquitin-like modifier-activating enzyme 1 OS=Homo sapiens OX=9606 GN=UBA1 PE=1 SV=3	I	NA	C#DTSNFSDYIR	NA	NA	1	NA	NA	0.0519271	NA	1
O00410	180	IPO5	IPO5_C180	IPO5_HUMAN Importin-5 OS=Homo sapiens OX=9606 GN=IPO5 PE=1 SV=4	Q	NA	C#MQDQEHPSIR	NA	NA	1	NA	NA	0.0530767	NA	1
Q6UB35	291	MTHFD1L	MTHFD1L_C291	C1TM_HUMAN Monofunctional C1-tetrahydrofolate synthase, mitochondrial OS=Homo sapiens OX=9606 GN=MTHFD1L PE=1 SV=1	N	NA	C#SHDFLSGK	NA	NA	1	NA	NA	0.0553551	NA	1
P36776	909	LONP1	LONP1_C909	LONM_HUMAN Lon protease homolog, mitochondrial OS=Homo sapiens OX=9606 GN=LONP1 PE=1 SV=2	T	NA	C#IVLPAENK	NA	NA	2	NA	NA	0.0904183	NA	1
Q9Y3F4	340	STRAP	STRAP_C340	STRAP_HUMAN Serine-threonine kinase receptor-associated protein OS=Homo sapiens OX=9606 GN=STRAP PE=1 SV=1	D	NA	C#IFPSAPDVK	NA	NA	1	NA	NA	0.0622048	NA	1
Q9ULT8	209	HECTD1	HECTD1_C209	HECD1_HUMAN E3 ubiquitin-protein ligase HECTD1 OS=Homo sapiens OX=9606 GN=HECTD1 PE=1 SV=3	R	NA	C#FASLADR	NA	NA	1	NA	NA	0.0640145	NA	1
P62937	62	PPIA	PPIA_C62	PPIA_HUMAN Peptidyl-prolyl cis-trans isomerase A OS=Homo sapiens OX=9606 GN=PPIA PE=1 SV=2	M	NA	C#QGGDFTR	NA	NA	2	NA	NA	0.0714316	NA	1
Q8TEX9	42	IPO4	IPO4_C42	IPO4_HUMAN Importin-4 OS=Homo sapiens OX=9606 GN=IPO4 PE=1 SV=2	L	NA	C#DLLASAADPQIR	NA	NA	2	NA	NA	0.15895	NA	1
P39687	123	ANP32A	ANP32A_C123	AN32A_HUMAN Acidic leucine-rich nuclear phosphoprotein 32 family member A OS=Homo sapiens OX=9606 GN=ANP32A PE=1 SV=1	N	NA	C#EVTNLNDYR	NA	NA	1	NA	NA	0.066374	NA	1
O00151	73	PDLIM1	PDLIM1_C73	PDLI1_HUMAN PDZ and LIM domain protein 1 OS=Homo sapiens OX=9606 GN=PDLIM1 PE=1 SV=4	G	NA	C#TDNLTLTVAR	NA	NA	1	NA	NA	0.216244	NA	1
P54136	638	RARS	RARS_C638	SYRC_HUMAN Arginine--tRNA ligase, cytoplasmic OS=Homo sapiens OX=9606 GN=RARS PE=1 SV=2	L	NA	C#EAVAAVMAK	NA	NA	2	NA	NA	0.204918	NA	1
Q9BQ67	90	GRWD1	GRWD1_C90	GRWD1_HUMAN Glutamate-rich WD repeat-containing protein 1 OS=Homo sapiens OX=9606 GN=GRWD1 PE=1 SV=1	L	NA	C#AGTQAESAQSNR	NA	NA	1	NA	NA	0.0686432	NA	1
P39023	253	RPL3	RPL3_C253	RL3_HUMAN 60S ribosomal protein L3 OS=Homo sapiens OX=9606 GN=RPL3 PE=1 SV=2	A	NA	C#IGAWHPAR	NA	NA	1	NA	NA	0.0697374	NA	1
Q8IXT5	204	RBM12B	RBM12B_C204	RB12B_HUMAN RNA-binding protein 12B OS=Homo sapiens OX=9606 GN=RBM12B PE=1 SV=2	S	NA	C#VDASGGLK	NA	NA	1	NA	NA	0.0733543	NA	1
Q9BY32	116	ITPA	ITPA_C116	ITPA_HUMAN Inosine triphosphate pyrophosphatase OS=Homo sapiens OX=9606 GN=ITPA PE=1 SV=2	L	NA	C#TFALSTGDPSQPVR	NA	NA	1	NA	NA	0.0753515	NA	1
Q8NDX6	50	ZNF740	ZNF740_C50	ZN740_HUMAN Zinc finger protein 740 OS=Homo sapiens OX=9606 GN=ZNF740 PE=1 SV=1	R	NA	C#SSQGHR	NA	NA	1	NA	NA	0.077139	NA	1
Q9Y4G6	1089	TLN2	TLN2_C1089	TLN2_HUMAN Talin-2 OS=Homo sapiens OX=9606 GN=TLN2 PE=1 SV=4	K	NA	C#AQDLGSTSK	NA	NA	1	NA	NA	0.0816243	NA	1
O15355	351	PPM1G	PPM1G_C351	PPM1G_HUMAN Protein phosphatase 1G OS=Homo sapiens OX=9606 GN=PPM1G PE=1 SV=1	R	NA	C#VVSEAGK	NA	NA	1	NA	NA	0.0840954	NA	1
O75131	100	CPNE3	CPNE3_C100	CPNE3_HUMAN Copine-3 OS=Homo sapiens OX=9606 GN=CPNE3 PE=1 SV=1	E	NA	C#TLGQIVSSK	NA	NA	1	NA	NA	0.0872974	NA	1
Q9H2C0	30	GAN	GAN_C30	GAN_HUMAN Gigaxonin OS=Homo sapiens OX=9606 GN=GAN PE=1 SV=1	F	NA	C#DAHLVLDGEEIPVQK	NA	NA	1	NA	NA	0.0878663	NA	1
Q9Y5L0	125	TNPO3	TNPO3_C125	TNPO3_HUMAN Transportin-3 OS=Homo sapiens OX=9606 GN=TNPO3 PE=1 SV=3	G	NA	C#VQTLVEK	NA	NA	1	NA	NA	0.095122	NA	1
Q5TAX3	204	TUT4	TUT4_C204	TUT4_HUMAN Terminal uridylyltransferase 4 OS=Homo sapiens OX=9606 GN=TUT4 PE=1 SV=3	K	NA	C#ALQNSPR	NA	NA	1	NA	NA	0.0969564	NA	1
P00558	50	PGK1	PGK1_C50	PGK1_HUMAN Phosphoglycerate kinase 1 OS=Homo sapiens OX=9606 GN=PGK1 PE=1 SV=3	F	NA	C#LDNGAK	NA	NA	1	NA	NA	0.100531	NA	1
O43390	226	HNRNPR	HNRNPR_C226	HNRPR_HUMAN Heterogeneous nuclear ribonucleoprotein R OS=Homo sapiens OX=9606 GN=HNRNPR PE=1 SV=1	L	NA	C#DSYEIRPGK	NA	NA	1	NA	NA	0.106857	NA	1
O43491	867	EPB41L2	EPB41L2_C867	E41L2_HUMAN Band 4.1-like protein 2 OS=Homo sapiens OX=9606 GN=EPB41L2 PE=1 SV=1	C	NA	C#SEPPVVK	NA	NA	2	NA	NA	0.196464	NA	1
P55265	649	ADAR	ADAR_C649	DSRAD_HUMAN Double-stranded RNA-specific adenosine deaminase OS=Homo sapiens OX=9606 GN=ADAR PE=1 SV=4	Y	NA	C#VAVGAQTFPSVSAPSK	NA	NA	1	NA	NA	0.112656	NA	1
O00267	740	SUPT5H	SUPT5H_C740	SPT5H_HUMAN Transcription elongation factor SPT5 OS=Homo sapiens OX=9606 GN=SUPT5H PE=1 SV=1	T	NA	C#QTISVDR	NA	NA	1	NA	NA	0.113088	NA	1
Q08211	438	DHX9	DHX9_C438	DHX9_HUMAN ATP-dependent RNA helicase A OS=Homo sapiens OX=9606 GN=DHX9 PE=1 SV=4	E	NA	C#NIVVTQPR	NA	NA	1	NA	NA	0.114726	NA	1
P50991	295	CCT4	CCT4_C295	TCPD_HUMAN T-complex protein 1 subunit delta OS=Homo sapiens OX=9606 GN=CCT4 PE=1 SV=4	G	NA	C#NVLLIQK	NA	NA	1	NA	NA	0.121691	NA	1
O43390	240	HNRNPR	HNRNPR_C240	HNRPR_HUMAN Heterogeneous nuclear ribonucleoprotein R OS=Homo sapiens OX=9606 GN=HNRNPR PE=1 SV=1	V	NA	C#ISVANNR	NA	NA	1	NA	NA	0.127264	NA	1
O75947	101	ATP5PD	ATP5PD_C101	ATP5H_HUMAN ATP synthase subunit d, mitochondrial OS=Homo sapiens OX=9606 GN=ATP5PD PE=1 SV=3	S	NA	C#AEWVSLSK	NA	NA	2	NA	NA	0.200136	NA	1
O60563	160	CCNT1	CCNT1_C160	CCNT1_HUMAN Cyclin-T1 OS=Homo sapiens OX=9606 GN=CCNT1 PE=1 SV=1	K	NA	C#TQLVR	NA	NA	1	NA	NA	0.131797	NA	1
Q6YHU6	1126	THADA	THADA_C1126	THADA_HUMAN Thyroid adenoma-associated protein OS=Homo sapiens OX=9606 GN=THADA PE=1 SV=1	R	NA	C#PNVSLQK	NA	NA	1	NA	NA	0.133257	NA	1
Q8NI27	1111	THOC2	THOC2_C1111	THOC2_HUMAN THO complex subunit 2 OS=Homo sapiens OX=9606 GN=THOC2 PE=1 SV=2	H	NA	C#LETGEYTHIR	NA	NA	1	NA	NA	0.138597	NA	1
P46940	1534	IQGAP1	IQGAP1_C1534	IQGA1_HUMAN Ras GTPase-activating-like protein IQGAP1 OS=Homo sapiens OX=9606 GN=IQGAP1 PE=1 SV=1	T	NA	C#LDNLASK	NA	NA	1	NA	NA	0.138639	NA	1
P00750	419	PLAT	PLAT_C419	TPA_HUMAN Tissue-type plasminogen activator OS=Homo sapiens OX=9606 GN=PLAT PE=1 SV=1	R	NA	C#AQESSVVR	NA	NA	1	NA	NA	0.140613	NA	1
O96013	58	PAK4	PAK4_C58	PAK4_HUMAN Serine/threonine-protein kinase PAK 4 OS=Homo sapiens OX=9606 GN=PAK4 PE=1 SV=1	A	NA	C#ITSIQPGAPK	NA	NA	1	NA	NA	0.142342	NA	1
P45880	13	VDAC2	VDAC2_C13	VDAC2_HUMAN Voltage-dependent anion-selective channel protein 2 OS=Homo sapiens OX=9606 GN=VDAC2 PE=1 SV=2	M	NA	C#IPPSYADLGK	NA	NA	2	NA	NA	0.25905	NA	1
Q9Y2S7	143	POLDIP2	POLDIP2_C143	PDIP2_HUMAN Polymerase delta-interacting protein 2 OS=Homo sapiens OX=9606 GN=POLDIP2 PE=1 SV=1	D	NA	C#PHISQR	NA	NA	1	NA	NA	0.145166	NA	1
P38646	66	HSPA9	HSPA9_C66	GRP75_HUMAN Stress-70 protein, mitochondrial OS=Homo sapiens OX=9606 GN=HSPA9 PE=1 SV=2	S	NA	C#VAVMEGK	NA	NA	1	NA	NA	0.151434	NA	1
Q969Z3	272	2019-03-02	43526_C272	MARC2_HUMAN Mitochondrial amidoxime reducing component 2 OS=Homo sapiens OX=9606 GN=MARC2 PE=1 SV=1	R	NA	C#ILTTVDPDTGVIDR	NA	NA	1	NA	NA	0.154358	NA	1
P54136	293	RARS	RARS_C293	SYRC_HUMAN Arginine--tRNA ligase, cytoplasmic OS=Homo sapiens OX=9606 GN=RARS PE=1 SV=2	Q	NA	C#VVLLQGK	NA	NA	1	NA	NA	0.158247	NA	1
Q00839	594	HNRNPU	HNRNPU_C594	HNRPU_HUMAN Heterogeneous nuclear ribonucleoprotein U OS=Homo sapiens OX=9606 GN=HNRNPU PE=1 SV=6	M	NA	C#LFAGFQR	NA	NA	2	NA	NA	0.195159	NA	1
O00571	317	DDX3X	DDX3X_C317	DDX3X_HUMAN ATP-dependent RNA helicase DDX3X OS=Homo sapiens OX=9606 GN=DDX3X PE=1 SV=3	G	NA	C#HLLVATPGR	NA	NA	1	NA	NA	0.164187	NA	1
P41252	336	IARS	IARS_C336	SYIC_HUMAN Isoleucine--tRNA ligase, cytoplasmic OS=Homo sapiens OX=9606 GN=IARS PE=1 SV=2	V	NA	C#MDFNIIR	NA	NA	1	NA	NA	0.164628	NA	1
P30154	402	PPP2R1B	PPP2R1B_C402	2AAB_HUMAN Serine/threonine-protein phosphatase 2A 65 kDa regulatory subunit A beta isoform OS=Homo sapiens OX=9606 GN=PPP2R1B PE=1 SV=3	D	NA	C#VNEVIGIR	NA	NA	1	NA	NA	0.166109	NA	1
P14373	284	TRIM27	TRIM27_C284	TRI27_HUMAN Zinc finger protein RFP OS=Homo sapiens OX=9606 GN=TRIM27 PE=1 SV=1	K	NA	C#LFLTESLK	NA	NA	1	NA	NA	0.166668	NA	1
Q9BXP5	490	SRRT	SRRT_C490	SRRT_HUMAN Serrate RNA effector molecule homolog OS=Homo sapiens OX=9606 GN=SRRT PE=1 SV=1	E	NA	C#ELSPGVNR	NA	NA	1	NA	NA	0.166861	NA	1
O00635	237	TRIM38	TRIM38_C237	TRI38_HUMAN E3 ubiquitin-protein ligase TRIM38 OS=Homo sapiens OX=9606 GN=TRIM38 PE=1 SV=1	K	NA	C#QGSAQK	NA	NA	1	NA	NA	0.172097	NA	1
Q9BTD8	385	RBM42	RBM42_C385	RBM42_HUMAN RNA-binding protein 42 OS=Homo sapiens OX=9606 GN=RBM42 PE=1 SV=1	F	NA	C#GDLGNEVNDDILAR	NA	NA	1	NA	NA	0.17647	NA	1
O00154	288	ACOT7	ACOT7_C288	BACH_HUMAN Cytosolic acyl coenzyme A thioester hydrolase OS=Homo sapiens OX=9606 GN=ACOT7 PE=1 SV=3	G	NA	C#VITISGR	NA	NA	1	NA	NA	0.177185	NA	1
A0A0B4J2D5	177	GATD3B	GATD3B_C177	GAL3B_HUMAN Glutamine amidotransferase-like class 1 domain-containing protein 3B, mitochondrial OS=Homo sapiens OX=9606 GN=GATD3B PE=1 SV=1	C	NA	C#IAPVLAAK	NA	NA	1	NA	NA	0.179784	NA	1
Q8TCG1	445	CIP2A	CIP2A_C445	CIP2A_HUMAN Protein CIP2A OS=Homo sapiens OX=9606 GN=CIP2A PE=1 SV=2	K	NA	C#TTLIEQQFTYGK	NA	NA	1	NA	NA	0.183989	NA	1
Q9UPU5	179	USP24	USP24_C179	UBP24_HUMAN Ubiquitin carboxyl-terminal hydrolase 24 OS=Homo sapiens OX=9606 GN=USP24 PE=1 SV=3	R	NA	C#MPEAFK	NA	NA	1	NA	NA	0.184396	NA	1
Q9NVU7	87	SDAD1	SDAD1_C87	SDA1_HUMAN Protein SDA1 homolog OS=Homo sapiens OX=9606 GN=SDAD1 PE=1 SV=3	S	NA	C#NHTVLDPDLR	NA	NA	1	NA	NA	0.187265	NA	1
Q9BZE4	174	GTPBP4	GTPBP4_C174	NOG1_HUMAN Nucleolar GTP-binding protein 1 OS=Homo sapiens OX=9606 GN=GTPBP4 PE=1 SV=3	L	NA	C#GYPNVGK	NA	NA	1	NA	NA	0.187493	NA	1
P62241	100	RPS8	RPS8_C100	RS8_HUMAN 40S ribosomal protein S8 OS=Homo sapiens OX=9606 GN=RPS8 PE=1 SV=2	N	NA	C#IVLIDSTPYR	NA	NA	1	NA	NA	0.190985	NA	1
Q3KQU3	251	MAP7D1	MAP7D1_C251	MA7D1_HUMAN MAP7 domain-containing protein 1 OS=Homo sapiens OX=9606 GN=MAP7D1 PE=1 SV=1	R	NA	C#SVSAVNLPK	NA	NA	1	NA	NA	0.192094	NA	1
P61764	552	STXBP1	STXBP1_C552	STXB1_HUMAN Syntaxin-binding protein 1 OS=Homo sapiens OX=9606 GN=STXBP1 PE=1 SV=1	R	NA	C#AYEVTQANGK	NA	NA	1	NA	NA	0.193237	NA	1
O75131	54	CPNE3	CPNE3_C54	CPNE3_HUMAN Copine-3 OS=Homo sapiens OX=9606 GN=CPNE3 PE=1 SV=1	N	NA	C#LNPQFSK	NA	NA	1	NA	NA	0.194997	NA	1
Q9UBX3	240	SLC25A10	SLC25A10_C240	DIC_HUMAN Mitochondrial dicarboxylate carrier OS=Homo sapiens OX=9606 GN=SLC25A10 PE=1 SV=2	H	NA	C#AVETAK	NA	NA	1	NA	NA	0.201776	NA	1
O75607	79	NPM3	NPM3_C79	NPM3_HUMAN Nucleoplasmin-3 OS=Homo sapiens OX=9606 GN=NPM3 PE=1 SV=3	E	NA	C#NVVEVVAR	NA	NA	1	NA	NA	0.202344	NA	1
Q5MNZ6	63	WDR45B	WDR45B_C63	WIPI3_HUMAN WD repeat domain phosphoinositide-interacting protein 3 OS=Homo sapiens OX=9606 GN=WDR45B PE=1 SV=2	R	NA	C#NYLALVGGGK	NA	NA	1	NA	NA	0.20252	NA	1
Q29RF7	508	PDS5A	PDS5A_C508	PDS5A_HUMAN Sister chromatid cohesion protein PDS5 homolog A OS=Homo sapiens OX=9606 GN=PDS5A PE=1 SV=1	K	NA	C#QNMLR	NA	NA	1	NA	NA	0.204536	NA	1
Q14166	528	TTLL12	TTLL12_C528	TTL12_HUMAN Tubulin--tyrosine ligase-like protein 12 OS=Homo sapiens OX=9606 GN=TTLL12 PE=1 SV=2	H	NA	C#EEFIPEFEK	NA	NA	1	NA	NA	0.209144	NA	1
P17987	147	TCP1	TCP1_C147	TCPA_HUMAN T-complex protein 1 subunit alpha OS=Homo sapiens OX=9606 GN=TCP1 PE=1 SV=1	D	NA	C#LINAAK	NA	NA	1	NA	NA	0.213777	NA	1
Q9H3S7	425	PTPN23	PTPN23_C425	PTN23_HUMAN Tyrosine-protein phosphatase non-receptor type 23 OS=Homo sapiens OX=9606 GN=PTPN23 PE=1 SV=1	K	NA	C#AALSVRPDTVR	NA	NA	1	NA	NA	0.215904	NA	1
Q9P2N7	601	KLHL13	KLHL13_C601	KLH13_HUMAN Kelch-like protein 13 OS=Homo sapiens OX=9606 GN=KLHL13 PE=1 SV=3	R	NA	C#MVEIVQK	NA	NA	1	NA	NA	0.217605	NA	1
Q99829	53	CPNE1	CPNE1_C53	CPNE1_HUMAN Copine-1 OS=Homo sapiens OX=9606 GN=CPNE1 PE=1 SV=1	N	NA	C#SSPEFSK	NA	NA	1	NA	NA	0.225224	NA	1
Q14204	1977	DYNC1H1	DYNC1H1_C1977	DYHC1_HUMAN Cytoplasmic dynein 1 heavy chain 1 OS=Homo sapiens OX=9606 GN=DYNC1H1 PE=1 SV=5	Q	NA	C#IQEALR	NA	NA	1	NA	NA	0.230037	NA	1
Q13155	306	AIMP2	AIMP2_C306	AIMP2_HUMAN Aminoacyl tRNA synthase complex-interacting multifunctional protein 2 OS=Homo sapiens OX=9606 GN=AIMP2 PE=1 SV=2	S	NA	C#ENLAPFNTALK	NA	NA	1	NA	NA	0.231036	NA	1
O60825	105	PFKFB2	PFKFB2_C105	F262_HUMAN 6-phosphofructo-2-kinase/fructose-2,6-bisphosphatase 2 OS=Homo sapiens OX=9606 GN=PFKFB2 PE=1 SV=2	Q	NA	C#ALVALEDVK	NA	NA	1	NA	NA	0.233694	NA	1
Q7L0Y3	123	TRMT10C	TRMT10C_C123	TM10C_HUMAN tRNA methyltransferase 10 homolog C OS=Homo sapiens OX=9606 GN=TRMT10C PE=1 SV=2	E	NA	C#VSNTAK	NA	NA	1	NA	NA	0.234113	NA	1
Q00534	15	CDK6	CDK6_C15	CDK6_HUMAN Cyclin-dependent kinase 6 OS=Homo sapiens OX=9606 GN=CDK6 PE=1 SV=1	E	NA	C#VAEIGEGAYGK	NA	NA	1	NA	NA	0.236544	NA	1
P52732	25	KIF11	KIF11_C25	KIF11_HUMAN Kinesin-like protein KIF11 OS=Homo sapiens OX=9606 GN=KIF11 PE=1 SV=2	R	NA	C#RPFNLAER	NA	NA	1	NA	NA	0.245159	NA	1
Q04760	61	GLO1	GLO1_C61	LGUL_HUMAN Lactoylglutathione lyase OS=Homo sapiens OX=9606 GN=GLO1 PE=1 SV=4	K	NA	C#DFPIMK	NA	NA	1	NA	NA	0.246791	NA	1
Q4J6C6	227	PREPL	PREPL_C227	PPCEL_HUMAN Prolyl endopeptidase-like OS=Homo sapiens OX=9606 GN=PREPL PE=1 SV=1	R	NA	C#HDVYR	NA	NA	1	NA	NA	0.249027	NA	1
O00410	266	IPO5	IPO5_C266	IPO5_HUMAN Importin-5 OS=Homo sapiens OX=9606 GN=IPO5 PE=1 SV=4	L	NA	C#GDTSLNNMQR	NA	NA	1	NA	NA	0.251035	NA	1
P32969	74	RPL9	RPL9_C74	RL9_HUMAN 60S ribosomal protein L9 OS=Homo sapiens OX=9606 GN=RPL9 PE=1 SV=1	I	NA	C#SHVQNMIK	NA	NA	1	NA	NA	0.261013	NA	1
Q9ULT8	316	HECTD1	HECTD1_C316	HECD1_HUMAN E3 ubiquitin-protein ligase HECTD1 OS=Homo sapiens OX=9606 GN=HECTD1 PE=1 SV=3	R	NA	C#VLDTMR	NA	NA	1	NA	NA	0.261025	NA	1
Q96HW7	666	INTS4	INTS4_C666	INT4_HUMAN Integrator complex subunit 4 OS=Homo sapiens OX=9606 GN=INTS4 PE=1 SV=2	R	NA	C#QLLILK	NA	NA	1	NA	NA	0.263728	NA	1
P05166	90	PCCB	PCCB_C90	PCCB_HUMAN Propionyl-CoA carboxylase beta chain, mitochondrial OS=Homo sapiens OX=9606 GN=PCCB PE=1 SV=3	R	NA	C#ADFGMAADK	NA	NA	1	NA	NA	0.264101	NA	1
Q8IX12	465	CCAR1	CCAR1_C465	CCAR1_HUMAN Cell division cycle and apoptosis regulator protein 1 OS=Homo sapiens OX=9606 GN=CCAR1 PE=1 SV=2	S	NA	C#ALAEDPQELR	NA	NA	1	NA	NA	0.265281	NA	1
P13797	566	PLS3	PLS3_C566	PLST_HUMAN Plastin-3 OS=Homo sapiens OX=9606 GN=PLS3 PE=1 SV=4	G	NA	C#INYDLVK	NA	NA	1	NA	NA	0.266847	NA	1
O00139	537	KIF2A	KIF2A_C537	KIF2A_HUMAN Kinesin-like protein KIF2A OS=Homo sapiens OX=9606 GN=KIF2A PE=1 SV=3	S	NA	C#ENTLNTLR	NA	NA	1	NA	NA	0.271394	NA	1
Q9P2D3	95	HEATR5B	HEATR5B_C95	HTR5B_HUMAN HEAT repeat-containing protein 5B OS=Homo sapiens OX=9606 GN=HEATR5B PE=1 SV=2	K	NA	C#NDIIR	NA	NA	1	NA	NA	0.273673	NA	1
P20585	142	MSH3	MSH3_C142	MSH3_HUMAN DNA mismatch repair protein Msh3 OS=Homo sapiens OX=9606 GN=MSH3 PE=1 SV=4	C	NA	C#DSALPQSR	NA	NA	1	NA	NA	0.273941	NA	1
O43175	48	PHGDH	PHGDH_C48	SERA_HUMAN D-3-phosphoglycerate dehydrogenase OS=Homo sapiens OX=9606 GN=PHGDH PE=1 SV=4	D	NA	C#EGLIVR	NA	NA	1	NA	NA	0.276101	NA	1
O15371	196	EIF3D	EIF3D_C196	EIF3D_HUMAN Eukaryotic translation initiation factor 3 subunit D OS=Homo sapiens OX=9606 GN=EIF3D PE=1 SV=1	C	NA	C#GALEYYDK	NA	NA	1	NA	NA	0.278468	NA	1
P13639	136	EEF2	EEF2_C136	EF2_HUMAN Elongation factor 2 OS=Homo sapiens OX=9606 GN=EEF2 PE=1 SV=4	V	NA	C#VQTETVLR	NA	NA	1	NA	NA	0.280232	NA	1
P13489	362	RNH1	RNH1_C362	RINI_HUMAN Ribonuclease inhibitor OS=Homo sapiens OX=9606 GN=RNH1 PE=1 SV=2	L	NA	C#QGLGQPGSVLR	NA	NA	1	NA	NA	0.280831	NA	1
Q9P289	77	STK26	STK26_C77	STK26_HUMAN Serine/threonine-protein kinase 26 OS=Homo sapiens OX=9606 GN=STK26 PE=1 SV=2	Q	NA	C#DSSYVTK	NA	NA	1	NA	NA	0.283246	NA	1
Q08211	242	DHX9	DHX9_C242	DHX9_HUMAN ATP-dependent RNA helicase A OS=Homo sapiens OX=9606 GN=DHX9 PE=1 SV=4	S	NA	C#ALSLVR	NA	NA	1	NA	NA	0.285546	NA	1
O60678	2	PRMT3	PRMT3_C2	ANM3_HUMAN Protein arginine N-methyltransferase 3 OS=Homo sapiens OX=9606 GN=PRMT3 PE=1 SV=4	M	NA	C#SLASGATGGR	NA	NA	1	NA	NA	0.291895	NA	1
P23919	31	DTYMK	DTYMK_C31	KTHY_HUMAN Thymidylate kinase OS=Homo sapiens OX=9606 GN=DTYMK PE=1 SV=4	L	NA	C#AAGHR	NA	NA	1	NA	NA	0.292881	NA	1
Q13155	291	AIMP2	AIMP2_C291	AIMP2_HUMAN Aminoacyl tRNA synthase complex-interacting multifunctional protein 2 OS=Homo sapiens OX=9606 GN=AIMP2 PE=1 SV=2	G	NA	C#SVTVPANVQR	NA	NA	1	NA	NA	0.293894	NA	1
Q96KG9	446	SCYL1	SCYL1_C446	SCYL1_HUMAN N-terminal kinase-like protein OS=Homo sapiens OX=9606 GN=SCYL1 PE=1 SV=1	R	NA	C#NTTVCLGK	NA	NA	1	NA	NA	0.298168	NA	1
Q12769	1166	NUP160	NUP160_C1166	NU160_HUMAN Nuclear pore complex protein Nup160 OS=Homo sapiens OX=9606 GN=NUP160 PE=1 SV=3	E	NA	C#TAAPTNR	NA	NA	1	NA	NA	0.29924	NA	1
P14618	358	PKM	PKM_C358	KPYM_HUMAN Pyruvate kinase PKM OS=Homo sapiens OX=9606 GN=PKM PE=1 SV=4	D	NA	C#IMLSGETAK	NA	NA	1	NA	NA	0.304126	NA	1
Q13263	232	TRIM28	TRIM28_C232	TIF1B_HUMAN Transcription intermediary factor 1-beta OS=Homo sapiens OX=9606 GN=TRIM28 PE=1 SV=5	D	NA	C#QLNAHK	NA	NA	1	NA	NA	0.307221	NA	1
Q9NS91	64	RAD18	RAD18_C64	RAD18_HUMAN E3 ubiquitin-protein ligase RAD18 OS=Homo sapiens OX=9606 GN=RAD18 PE=1 SV=2	C	NA	C#VTVTEPDLK	NA	NA	1	NA	NA	0.307346	NA	1
O75528	162	TADA3	TADA3_C162	TADA3_HUMAN Transcriptional adapter 3 OS=Homo sapiens OX=9606 GN=TADA3 PE=1 SV=1	Y	NA	C#ADITSEEVR	NA	NA	1	NA	NA	0.309656	NA	1
Q96J01	25	THOC3	THOC3_C25	THOC3_HUMAN THO complex subunit 3 OS=Homo sapiens OX=9606 GN=THOC3 PE=1 SV=1	W	NA	C#SVSSGPSR	NA	NA	1	NA	NA	0.309746	NA	1
O75439	62	PMPCB	PMPCB_C62	MPPB_HUMAN Mitochondrial-processing peptidase subunit beta OS=Homo sapiens OX=9606 GN=PMPCB PE=1 SV=2	T	NA	C#LESGLR	NA	NA	1	NA	NA	0.30997	NA	1
P78527	111	PRKDC	PRKDC_C111	PRKDC_HUMAN DNA-dependent protein kinase catalytic subunit OS=Homo sapiens OX=9606 GN=PRKDC PE=1 SV=3	T	NA	C#TSVYTK	NA	NA	1	NA	NA	0.311536	NA	1
P49792	1791	RANBP2	RANBP2_C1791	RBP2_HUMAN E3 SUMO-protein ligase RanBP2 OS=Homo sapiens OX=9606 GN=RANBP2 PE=1 SV=2	C	NA	C#VQNESSSLK	NA	NA	1	NA	NA	0.311984	NA	1
P62837	111	UBE2D2	UBE2D2_C111	UB2D2_HUMAN Ubiquitin-conjugating enzyme E2 D2 OS=Homo sapiens OX=9606 GN=UBE2D2 PE=1 SV=1	L	NA	C#DPNPDDPLVPEIAR	NA	NA	1	NA	NA	0.314305	NA	1
P11586	236	MTHFD1	MTHFD1_C236	C1TC_HUMAN C-1-tetrahydrofolate synthase, cytoplasmic OS=Homo sapiens OX=9606 GN=MTHFD1 PE=1 SV=3	D	NA	C#GINYVPDDK	NA	NA	1	NA	NA	0.314582	NA	1
Q96EA4	416	SPDL1	SPDL1_C416	SPDLY_HUMAN Protein Spindly OS=Homo sapiens OX=9606 GN=SPDL1 PE=1 SV=2	R	NA	C#LQLSESENMK	NA	NA	1	NA	NA	0.315532	NA	1
Q13151	36	HNRNPA0	HNRNPA0_C36	ROA0_HUMAN Heterogeneous nuclear ribonucleoprotein A0 OS=Homo sapiens OX=9606 GN=HNRNPA0 PE=1 SV=1	D	NA	C#VVVVNPQTK	NA	NA	1	NA	NA	0.315589	NA	1
O00273	154	DFFA	DFFA_C154	DFFA_HUMAN DNA fragmentation factor subunit alpha OS=Homo sapiens OX=9606 GN=DFFA PE=1 SV=1	P	NA	C#SDLAQELR	NA	NA	1	NA	NA	0.317741	NA	1
Q13098	175	GPS1	GPS1_C175	CSN1_HUMAN COP9 signalosome complex subunit 1 OS=Homo sapiens OX=9606 GN=GPS1 PE=1 SV=4	D	NA	C#GDLSNALK	NA	NA	1	NA	NA	0.317944	NA	1
P55265	392	ADAR	ADAR_C392	DSRAD_HUMAN Double-stranded RNA-specific adenosine deaminase OS=Homo sapiens OX=9606 GN=ADAR PE=1 SV=4	T	NA	C#NIPTSNASNNMVTTEK	NA	NA	1	NA	NA	0.318296	NA	1
Q7Z6K5	183	ARPIN	ARPIN_C183	ARPIN_HUMAN Arpin OS=Homo sapiens OX=9606 GN=ARPIN PE=1 SV=1	K	NA	C#NFTGDGK	NA	NA	1	NA	NA	0.319812	NA	1
P13804	53	ETFA	ETFA_C53	ETFA_HUMAN Electron transfer flavoprotein subunit alpha, mitochondrial OS=Homo sapiens OX=9606 GN=ETFA PE=1 SV=1	S	NA	C#LVAGTK	NA	NA	1	NA	NA	0.320855	NA	1
Q13613	12	MTMR1	MTMR1_C12	MTMR1_HUMAN Myotubularin-related protein 1 OS=Homo sapiens OX=9606 GN=MTMR1 PE=1 SV=4	G	NA	C#EGGGGPNPGPAGGR	NA	NA	1	NA	NA	0.322618	NA	1
Q9UQ35	872	SRRM2	SRRM2_C872	SRRM2_HUMAN Serine/arginine repetitive matrix protein 2 OS=Homo sapiens OX=9606 GN=SRRM2 PE=1 SV=2	S	NA	C#FESSPDPELK	NA	NA	1	NA	NA	0.327412	NA	1
P50991	252	CCT4	CCT4_C252	TCPD_HUMAN T-complex protein 1 subunit delta OS=Homo sapiens OX=9606 GN=CCT4 PE=1 SV=4	F	NA	C#LSAPK	NA	NA	1	NA	NA	0.329687	NA	1
P54132	318	BLM	BLM_C318	BLM_HUMAN Bloom syndrome protein OS=Homo sapiens OX=9606 GN=BLM PE=1 SV=1	K	NA	C#LSTLK	NA	NA	1	NA	NA	0.335479	NA	1
Q9P2J5	936	LARS	LARS_C936	SYLC_HUMAN Leucine--tRNA ligase, cytoplasmic OS=Homo sapiens OX=9606 GN=LARS PE=1 SV=2	H	NA	C#TIYVAK	NA	NA	1	NA	NA	0.337507	NA	1
P52272	653	HNRNPM	HNRNPM_C653	HNRPM_HUMAN Heterogeneous nuclear ribonucleoprotein M OS=Homo sapiens OX=9606 GN=HNRNPM PE=1 SV=3	A	NA	C#QIFVR	NA	NA	1	NA	NA	0.338235	NA	1
P63104	94	YWHAZ	YWHAZ_C94	1433Z_HUMAN 14-3-3 protein zeta/delta OS=Homo sapiens OX=9606 GN=YWHAZ PE=1 SV=1	I	NA	C#NDVLSLLEK	NA	NA	1	NA	NA	0.33862	NA	1
P78406	217	RAE1	RAE1_C217	RAE1L_HUMAN mRNA export factor OS=Homo sapiens OX=9606 GN=RAE1 PE=1 SV=1	R	NA	C#VAIFK	NA	NA	1	NA	NA	0.342379	NA	1
P00488	328	F13A1	F13A1_C328	F13A_HUMAN Coagulation factor XIII A chain OS=Homo sapiens OX=9606 GN=F13A1 PE=1 SV=4	R	NA	C#LGIPAR	NA	NA	1	NA	NA	0.343465	NA	1
Q13263	177	TRIM28	TRIM28_C177	TIF1B_HUMAN Transcription intermediary factor 1-beta OS=Homo sapiens OX=9606 GN=TRIM28 PE=1 SV=5	T	NA	C#VEAHQR	NA	NA	1	NA	NA	0.34574	NA	1
O15269	438	SPTLC1	SPTLC1_C438	SPTC1_HUMAN Serine palmitoyltransferase 1 OS=Homo sapiens OX=9606 GN=SPTLC1 PE=1 SV=1	K	NA	C#LPPPSIR	NA	NA	1	NA	NA	0.346798	NA	1
Q8TBC4	237	UBA3	UBA3_C237	UBA3_HUMAN NEDD8-activating enzyme E1 catalytic subunit OS=Homo sapiens OX=9606 GN=UBA3 PE=1 SV=2	M	NA	C#TIASMPR	NA	NA	1	NA	NA	0.348326	NA	1
P0DMV8	306	HSPA1A	HSPA1A_C306	HS71A_HUMAN Heat shock 70 kDa protein 1A OS=Homo sapiens OX=9606 GN=HSPA1A PE=1 SV=1	L	NA	C#SDIFR	NA	NA	1	NA	NA	0.350577	NA	1
Q9NVP1	472	DDX18	DDX18_C472	DDX18_HUMAN ATP-dependent RNA helicase DDX18 OS=Homo sapiens OX=9606 GN=DDX18 PE=1 SV=2	F	NA	C#NADSGTLLCTDVAAR	NA	NA	1	NA	NA	0.352533	NA	1
Q9UG01	1430	IFT172	IFT172_C1430	IF172_HUMAN Intraflagellar transport protein 172 homolog OS=Homo sapiens OX=9606 GN=IFT172 PE=1 SV=2	K	NA	C#IETATK	NA	NA	1	NA	NA	0.352596	NA	1
Q08211	1099	DHX9	DHX9_C1099	DHX9_HUMAN ATP-dependent RNA helicase A OS=Homo sapiens OX=9606 GN=DHX9 PE=1 SV=4	A	NA	C#ITGLR	NA	NA	1	NA	NA	0.35312	NA	1
P26640	917	VARS	VARS_C917	SYVC_HUMAN Valine--tRNA ligase OS=Homo sapiens OX=9606 GN=VARS PE=1 SV=4	E	NA	C#GTDALR	NA	NA	1	NA	NA	0.357502	NA	1
Q8IX18	124	DHX40	DHX40_C124	DHX40_HUMAN Probable ATP-dependent RNA helicase DHX40 OS=Homo sapiens OX=9606 GN=DHX40 PE=1 SV=2	K	NA	C#TLGSK	NA	NA	1	NA	NA	0.362227	NA	1
P39023	336	RPL3	RPL3_C336	RL3_HUMAN 60S ribosomal protein L3 OS=Homo sapiens OX=9606 GN=RPL3 PE=1 SV=2	G	NA	C#VVGTK	NA	NA	1	NA	NA	0.365726	NA	1
Q86U86	1233	PBRM1	PBRM1_C1233	PB1_HUMAN Protein polybromo-1 OS=Homo sapiens OX=9606 GN=PBRM1 PE=1 SV=1	K	NA	C#AVLSFK	NA	NA	1	NA	NA	0.377548	NA	1
P48426	343	PIP4K2A	PIP4K2A_C343	PI42A_HUMAN Phosphatidylinositol 5-phosphate 4-kinase type-2 alpha OS=Homo sapiens OX=9606 GN=PIP4K2A PE=1 SV=2	K	NA	C#HENSPR	NA	NA	1	NA	NA	0.378933	NA	1
P20700	443	LMNB1	LMNB1_C443	LMNB1_HUMAN Lamin-B1 OS=Homo sapiens OX=9606 GN=LMNB1 PE=1 SV=2	V	NA	C#IEEIDVDGK	NA	NA	1	NA	NA	0.37955	NA	1
P13637	508	ATP1A3	ATP1A3_C508	AT1A3_HUMAN Sodium/potassium-transporting ATPase subunit alpha-3 OS=Homo sapiens OX=9606 GN=ATP1A3 PE=1 SV=3	R	NA	C#STILLQGK	NA	NA	1	NA	NA	0.389004	NA	1
P55060	842	CSE1L	CSE1L_C842	XPO2_HUMAN Exportin-2 OS=Homo sapiens OX=9606 GN=CSE1L PE=1 SV=3	I	NA	C#AVGITK	NA	NA	1	NA	NA	0.393463	NA	1
Q96BN8	17	OTULIN	OTULIN_C17	OTUL_HUMAN Ubiquitin thioesterase otulin OS=Homo sapiens OX=9606 GN=OTULIN PE=1 SV=3	S	NA	C#AETPAR	NA	NA	1	NA	NA	0.393938	NA	1
Q8WUA4	310	GTF3C2	GTF3C2_C310	TF3C2_HUMAN General transcription factor 3C polypeptide 2 OS=Homo sapiens OX=9606 GN=GTF3C2 PE=1 SV=2	K	NA	C#LHLTK	NA	NA	1	NA	NA	0.395434	NA	1
Q15392	499	DHCR24	DHCR24_C499	DHC24_HUMAN Delta(24)-sterol reductase OS=Homo sapiens OX=9606 GN=DHCR24 PE=1 SV=2	G	NA	C#QDAFPEVYDK	NA	NA	1	NA	NA	0.397466	NA	1
P10155	71	RO60	RO60_C71	RO60_HUMAN 60 kDa SS-A/Ro ribonucleoprotein OS=Homo sapiens OX=9606 GN=RO60 PE=1 SV=2	G	NA	C#EVIQEIK	NA	NA	1	NA	NA	0.398357	NA	1
Q7Z7H8	64	MRPL10	MRPL10_C64	RM10_HUMAN 39S ribosomal protein L10, mitochondrial OS=Homo sapiens OX=9606 GN=MRPL10 PE=1 SV=3	S	NA	C#LPSPPSPPQEEIGLIR	NA	NA	1	NA	NA	0.400881	NA	1
P05198	218	EIF2S1	EIF2S1_C218	IF2A_HUMAN Eukaryotic translation initiation factor 2 subunit 1 OS=Homo sapiens OX=9606 GN=EIF2S1 PE=1 SV=3	N	NA	C#STENMPIK	NA	NA	1	NA	NA	0.403726	NA	1
Q9BPX3	202	NCAPG	NCAPG_C202	CND3_HUMAN Condensin complex subunit 3 OS=Homo sapiens OX=9606 GN=NCAPG PE=1 SV=1	S	NA	C#IAPSAK	NA	NA	1	NA	NA	0.404146	NA	1
P48643	253	CCT5	CCT5_C253	TCPE_HUMAN T-complex protein 1 subunit epsilon OS=Homo sapiens OX=9606 GN=CCT5 PE=1 SV=1	T	NA	C#PFEPPKPK	NA	NA	1	NA	NA	0.404437	NA	1
P51970	66	NDUFA8	NDUFA8_C66	NDUA8_HUMAN NADH dehydrogenase [ubiquinone] 1 alpha subcomplex subunit 8 OS=Homo sapiens OX=9606 GN=NDUFA8 PE=1 SV=3	K	NA	C#ALDFFR	NA	NA	1	NA	NA	0.40445	NA	1
Q08J23	184	NSUN2	NSUN2_C184	NSUN2_HUMAN tRNA (cytosine(34)-C(5))-methyltransferase OS=Homo sapiens OX=9606 GN=NSUN2 PE=1 SV=2	M	NA	C#AAPGSK	NA	NA	1	NA	NA	0.405043	NA	1
P26640	41	VARS	VARS_C41	SYVC_HUMAN Valine--tRNA ligase OS=Homo sapiens OX=9606 GN=VARS PE=1 SV=4	I	NA	C#LQPPPTSR	NA	NA	1	NA	NA	0.406946	NA	1
Q14152	78	EIF3A	EIF3A_C78	EIF3A_HUMAN Eukaryotic translation initiation factor 3 subunit A OS=Homo sapiens OX=9606 GN=EIF3A PE=1 SV=1	I	NA	C#QQVNIK	NA	NA	1	NA	NA	0.407088	NA	1
P38646	317	HSPA9	HSPA9_C317	GRP75_HUMAN Stress-70 protein, mitochondrial OS=Homo sapiens OX=9606 GN=HSPA9 PE=1 SV=2	K	NA	NA	C#ELSSSVQTDINLPYLTMDSSGPK	NA	NA	1	NA	NA	5.93e-05	1
O14654	206	IRS4	IRS4_C206	IRS4_HUMAN Insulin receptor substrate 4 OS=Homo sapiens OX=9606 GN=IRS4 PE=1 SV=1	R	NA	NA	C#GTLGAQPDGEPAALAAAAAAEPPFYK	NA	NA	1	NA	NA	7.08e-05	1
P0DMV8	574	HSPA1A	HSPA1A_C574	HS71A_HUMAN Heat shock 70 kDa protein 1A OS=Homo sapiens OX=9606 GN=HSPA1A PE=1 SV=1	K	NA	NA	C#QEVISWLDANTLAEKDEFEHK C#QEVISWLDANTLAEK	NA	NA	3	NA	NA	0.0113795	1
Q9NY12	88	GAR1	GAR1_C88	GAR1_HUMAN H/ACA ribonucleoprotein complex subunit 1 OS=Homo sapiens OX=9606 GN=GAR1 PE=1 SV=1	K	NA	NA	C#TTDENKVPYFNAPVYLENK	NA	NA	1	NA	NA	0.000279804	1
O14980	723	XPO1	XPO1_C723	XPO1_HUMAN Exportin-1 OS=Homo sapiens OX=9606 GN=XPO1 PE=1 SV=1	K	NA	NA	C#LSENISAAIQANGEMVTK	NA	NA	1	NA	NA	0.000298656	1
P39687	87	ANP32A	ANP32A_C87	AN32A_HUMAN Acidic leucine-rich nuclear phosphoprotein 32 family member A OS=Homo sapiens OX=9606 GN=ANP32A PE=1 SV=1	K	NA	NA	C#PNLTHLNLSGNK	NA	NA	1	NA	NA	0.000468264	1
Q9Y617	98	PSAT1	PSAT1_C98	SERC_HUMAN Phosphoserine aminotransferase OS=Homo sapiens OX=9606 GN=PSAT1 PE=1 SV=2	R	NA	NA	C#ADYVVTGAWSAK	NA	NA	2	NA	NA	0.00577343	1
P43243	230	MATR3	MATR3_C230	MATR3_HUMAN Matrin-3 OS=Homo sapiens OX=9606 GN=MATR3 PE=1 SV=2	R	NA	NA	C#RDDSFFGETSHNYHK	NA	NA	1	NA	NA	0.000670953	1
Q9UGI8	46	TES	TES_C46	TES_HUMAN Testin OS=Homo sapiens OX=9606 GN=TES PE=1 SV=1	K	NA	NA	C#GQEEHDVLLSNEEDRK C#GQEEHDVLLSNEEDR	NA	NA	3	NA	NA	0.00201126	1
P51659	425	HSD17B4	HSD17B4_C425	DHB4_HUMAN Peroxisomal multifunctional enzyme type 2 OS=Homo sapiens OX=9606 GN=HSD17B4 PE=1 SV=3	K	NA	NA	C#EAVVADVLDK	NA	NA	1	NA	NA	0.000759091	1
Q07020	134	RPL18	RPL18_C134	RL18_HUMAN 60S ribosomal protein L18 OS=Homo sapiens OX=9606 GN=RPL18 PE=1 SV=2	G	NA	NA	C#GTVLLSGPR	NA	NA	1	NA	NA	0.0213653	1
P07900	420	HSP90AA1	HSP90AA1_C420	HS90A_HUMAN Heat shock protein HSP 90-alpha OS=Homo sapiens OX=9606 GN=HSP90AA1 PE=1 SV=5	K	NA	NA	C#LELFTELAEDKENYK C#LELFTELAEDKENYKK	NA	NA	3	NA	NA	0.00330071	1
Q9NYV4	862	CDK12	CDK12_C862	CDK12_HUMAN Cyclin-dependent kinase 12 OS=Homo sapiens OX=9606 GN=CDK12 PE=1 SV=2	K	NA	NA	C#SNILLNNSGQIK	NA	NA	1	NA	NA	0.000978061	1
Q15435	112	PPP1R7	PPP1R7_C112	PP1R7_HUMAN Protein phosphatase 1 regulatory subunit 7 OS=Homo sapiens OX=9606 GN=PPP1R7 PE=1 SV=1	K	NA	NA	C#IENLEELQSLR	NA	NA	1	NA	NA	0.00116337	1
Q14566	242	MCM6	MCM6_C242	MCM6_HUMAN DNA replication licensing factor MCM6 OS=Homo sapiens OX=9606 GN=MCM6 PE=1 SV=1	K	NA	NA	C#DFTGTLIVVPDVSK	NA	NA	1	NA	NA	0.00137274	1
O75694	974	NUP155	NUP155_C974	NU155_HUMAN Nuclear pore complex protein Nup155 OS=Homo sapiens OX=9606 GN=NUP155 PE=1 SV=1	K	NA	NA	C#ITDTLQELVNQSK	NA	NA	2	NA	NA	0.00256365	1
P04150	367	NR3C1	NR3C1_C367	GCR_HUMAN Glucocorticoid receptor OS=Homo sapiens OX=9606 GN=NR3C1 PE=1 SV=1	R	NA	NA	C#QGSGDDNLTSLGTLNFPGR	NA	NA	1	NA	NA	0.00143096	1
O75794	289	CDC123	CDC123_C289	CD123_HUMAN Cell division cycle protein 123 homolog OS=Homo sapiens OX=9606 GN=CDC123 PE=1 SV=1	R	NA	NA	C#TNSEVTVQPSPYLSYR	NA	NA	2	NA	NA	0.00387388	1
P15880	229	RPS2	RPS2_C229	RS2_HUMAN 40S ribosomal protein S2 OS=Homo sapiens OX=9606 GN=RPS2 PE=1 SV=2	G	NA	NA	C#TATLGNFAK	NA	NA	1	NA	NA	0.0129323	1
Q99536	50	VAT1	VAT1_C50	VAT1_HUMAN Synaptic vesicle membrane protein VAT-1 homolog OS=Homo sapiens OX=9606 GN=VAT1 PE=1 SV=2	R	NA	NA	C#LVLTGFGGYDK	NA	NA	1	NA	NA	0.00201206	1
Q9P2R3	34	ANKFY1	ANKFY1_C34	ANFY1_HUMAN Rabankyrin-5 OS=Homo sapiens OX=9606 GN=ANKFY1 PE=1 SV=2	R	NA	NA	C#ALLAAQANK	NA	NA	1	NA	NA	0.00251611	1
Q5VTR2	960	RNF20	RNF20_C960	BRE1A_HUMAN E3 ubiquitin-protein ligase BRE1A OS=Homo sapiens OX=9606 GN=RNF20 PE=1 SV=2	K	NA	NA	C#NAAFGANDFHR	NA	NA	2	NA	NA	0.080824	1
Q16850	449	CYP51A1	CYP51A1_C449	CP51A_HUMAN Lanosterol 14-alpha demethylase OS=Homo sapiens OX=9606 GN=CYP51A1 PE=1 SV=3	R	NA	NA	C#IGENFAYVQIK	NA	NA	1	NA	NA	0.00320981	1
Q13427	10	PPIG	PPIG_C10	PPIG_HUMAN Peptidyl-prolyl cis-trans isomerase G OS=Homo sapiens OX=9606 GN=PPIG PE=1 SV=2	R	NA	NA	C#FFDIAINNQPAGR	NA	NA	2	NA	NA	0.00416628	1
Q8N726	100	CDKN2A	CDKN2A_C100	ARF_HUMAN Tumor suppressor ARF OS=Homo sapiens OX=9606 GN=CDKN2A PE=1 SV=2	R	NA	NA	C#PGGLPGHAGGAAPGR	NA	NA	1	NA	NA	0.0033046	1
P52294	469	KPNA1	KPNA1_C469	IMA5_HUMAN Importin subunit alpha-5 OS=Homo sapiens OX=9606 GN=KPNA1 PE=1 SV=3	Y	NA	NA	C#ALIEEAYGLDK	NA	NA	1	NA	NA	0.00363136	1
P61247	96	RPS3A	RPS3A_C96	RS3A_HUMAN 40S ribosomal protein S3a OS=Homo sapiens OX=9606 GN=RPS3A PE=1 SV=2	N	NA	NA	C#LTNFHGMDLTR	NA	NA	2	NA	NA	0.0105441	1
Q9ULW0	145	TPX2	TPX2_C145	TPX2_HUMAN Targeting protein for Xklp2 OS=Homo sapiens OX=9606 GN=TPX2 PE=1 SV=2	R	NA	NA	C#ATPVIIDEILPSKK C#ATPVIIDEILPSK	NA	NA	4	NA	NA	0.0356889	1
O75592	1169	MYCBP2	MYCBP2_C1169	MYCB2_HUMAN E3 ubiquitin-protein ligase MYCBP2 OS=Homo sapiens OX=9606 GN=MYCBP2 PE=1 SV=4	R	NA	NA	C#SILSPELALPTGSR	NA	NA	1	NA	NA	0.00461867	1
Q9P2R7	384	SUCLA2	SUCLA2_C384	SUCB1_HUMAN Succinate--CoA ligase [ADP-forming] subunit beta, mitochondrial OS=Homo sapiens OX=9606 GN=SUCLA2 PE=1 SV=3	R	NA	NA	C#DVIAQGIVMAVK	NA	NA	2	NA	NA	0.0178508	1
Q14247	246	CTTN	CTTN_C246	SRC8_HUMAN Src substrate cortactin OS=Homo sapiens OX=9606 GN=CTTN PE=1 SV=2	K	NA	NA	C#ALGWDHQEK	NA	NA	1	NA	NA	0.00471223	1
Q6P2E9	4	EDC4	EDC4_C4	EDC4_HUMAN Enhancer of mRNA-decapping protein 4 OS=Homo sapiens OX=9606 GN=EDC4 PE=1 SV=1	S	NA	NA	C#ASIDIEDATQHLR	NA	NA	1	NA	NA	0.00510092	1
Q9BZH6	1000	WDR11	WDR11_C1000	WDR11_HUMAN WD repeat-containing protein 11 OS=Homo sapiens OX=9606 GN=WDR11 PE=1 SV=1	K	NA	NA	C#TDQLLLLGQTDR	NA	NA	1	NA	NA	0.00533058	1
P33992	482	MCM5	MCM5_C482	MCM5_HUMAN DNA replication licensing factor MCM5 OS=Homo sapiens OX=9606 GN=MCM5 PE=1 SV=5	R	NA	NA	C#SVLAAANSVFGR	NA	NA	2	NA	NA	0.180764	1
Q6NXT6	487	TAPT1	TAPT1_C487	TAPT1_HUMAN Transmembrane anterior posterior transformation protein 1 homolog OS=Homo sapiens OX=9606 GN=TAPT1 PE=1 SV=1	K	NA	NA	C#KPSQGLSTEENLSASITK	NA	NA	1	NA	NA	0.00602808	1
O95487	562	SEC24B	SEC24B_C562	SC24B_HUMAN Protein transport protein Sec24B OS=Homo sapiens OX=9606 GN=SEC24B PE=1 SV=2	R	NA	NA	C#TLTNIPQTQALLNK	NA	NA	1	NA	NA	0.00678327	1
Q8ND82	242	ZNF280C	ZNF280C_C242	Z280C_HUMAN Zinc finger protein 280C OS=Homo sapiens OX=9606 GN=ZNF280C PE=1 SV=1	K	NA	NA	C#NVQFNLLDPLK	NA	NA	1	NA	NA	0.0082405	1
Q969Z0	246	TBRG4	TBRG4_C246	FAKD4_HUMAN FAST kinase domain-containing protein 4 OS=Homo sapiens OX=9606 GN=TBRG4 PE=1 SV=1	K	NA	NA	C#LELVEHFGPNELR	NA	NA	2	NA	NA	0.0091081	1
P18858	846	LIG1	LIG1_C846	DNLI1_HUMAN DNA ligase 1 OS=Homo sapiens OX=9606 GN=LIG1 PE=1 SV=1	K	NA	NA	C#ADLSLSPIYPAAR	NA	NA	1	NA	NA	0.00877243	1
Q6ZN55	656	ZNF574	ZNF574_C656	ZN574_HUMAN Zinc finger protein 574 OS=Homo sapiens OX=9606 GN=ZNF574 PE=1 SV=2	R	NA	NA	C#AAAAAQAPR	NA	NA	1	NA	NA	0.00890507	1
P26639	254	TARS	TARS_C254	SYTC_HUMAN Threonine--tRNA ligase, cytoplasmic OS=Homo sapiens OX=9606 GN=TARS PE=1 SV=3	R	NA	NA	C#GPLIDLCR	NA	NA	1	NA	NA	0.00941576	1
Q8NFH5	255	NUP35	NUP35_C255	NUP35_HUMAN Nucleoporin NUP35 OS=Homo sapiens OX=9606 GN=NUP35 PE=1 SV=1	R	NA	NA	C#ALSSPSLAFTPPIK	NA	NA	2	NA	NA	0.0914646	1
Q13501	290	SQSTM1	SQSTM1_C290	SQSTM_HUMAN Sequestosome-1 OS=Homo sapiens OX=9606 GN=SQSTM1 PE=1 SV=1	C	NA	NA	C#SDPSKPGGNVEGATQSLAEQMR	NA	NA	1	NA	NA	0.010965	1
Q9H9E3	25	COG4	COG4_C25	COG4_HUMAN Conserved oligomeric Golgi complex subunit 4 OS=Homo sapiens OX=9606 GN=COG4 PE=1 SV=3	R	NA	NA	C#SEISAELIR	NA	NA	1	NA	NA	0.0115024	1
Q92888	815	ARHGEF1	ARHGEF1_C815	ARHG1_HUMAN Rho guanine nucleotide exchange factor 1 OS=Homo sapiens OX=9606 GN=ARHGEF1 PE=1 SV=2	F	NA	NA	C#RPGPEGQLAATALR	NA	NA	1	NA	NA	0.0120071	1
Q9Y2H6	211	FNDC3A	FNDC3A_C211	FND3A_HUMAN Fibronectin type-III domain-containing protein 3A OS=Homo sapiens OX=9606 GN=FNDC3A PE=1 SV=4	K	NA	NA	C#PSPINEHNGLIK	NA	NA	1	NA	NA	0.0136658	1
O60684	467	KPNA6	KPNA6_C467	IMA7_HUMAN Importin subunit alpha-7 OS=Homo sapiens OX=9606 GN=KPNA6 PE=1 SV=1	Y	NA	NA	C#GLIEEAYGLDK	NA	NA	1	NA	NA	0.0142422	1
P22102	646	GART	GART_C646	PUR2_HUMAN Trifunctional purine biosynthetic protein adenosine-3 OS=Homo sapiens OX=9606 GN=GART PE=1 SV=1	G	NA	NA	C#GDQTLGDLLLTPTR	NA	NA	1	NA	NA	0.0143483	1
Q9UBB4	134	ATXN10	ATXN10_C134	ATX10_HUMAN Ataxin-10 OS=Homo sapiens OX=9606 GN=ATXN10 PE=1 SV=1	R	NA	NA	C#GLQFLGNIASR	NA	NA	1	NA	NA	0.0143611	1
Q6P1N9	168	TATDN1	TATDN1_C168	TATD1_HUMAN Putative deoxyribonuclease TATDN1 OS=Homo sapiens OX=9606 GN=TATDN1 PE=1 SV=2	R	NA	NA	C#VGGVVHSFDGTK	NA	NA	1	NA	NA	0.016291	1
Q99613	79	EIF3C	EIF3C_C79	EIF3C_HUMAN Eukaryotic translation initiation factor 3 subunit C OS=Homo sapiens OX=9606 GN=EIF3C PE=1 SV=1	K	NA	NA	C#LEEFELLGK	NA	NA	1	NA	NA	0.0169397	1
Q92616	1275	GCN1	GCN1_C1275	GCN1_HUMAN eIF-2-alpha kinase activator GCN1 OS=Homo sapiens OX=9606 GN=GCN1 PE=1 SV=6	K	NA	NA	C#MLDAALATLNTHGK	NA	NA	1	NA	NA	0.0174751	1
P21333	810	FLNA	FLNA_C810	FLNA_HUMAN Filamin-A OS=Homo sapiens OX=9606 GN=FLNA PE=1 SV=4	K	NA	NA	C#APGVVGPAEADIDFDIIR	NA	NA	1	NA	NA	0.0177641	1
P52732	740	KIF11	KIF11_C740	KIF11_HUMAN Kinesin-like protein KIF11 OS=Homo sapiens OX=9606 GN=KIF11 PE=1 SV=2	K	NA	NA	C#ENIQKPLSSVQENIQQK	NA	NA	1	NA	NA	0.0182683	1
Q8TAV0	58	FAM76A	FAM76A_C58	FA76A_HUMAN Protein FAM76A OS=Homo sapiens OX=9606 GN=FAM76A PE=2 SV=1	K	NA	NA	C#AQNVQLYGTPK	NA	NA	1	NA	NA	0.0190129	1
Q9H2J7	367	SLC6A15	SLC6A15_C367	S6A15_HUMAN Sodium-dependent neutral amino acid transporter B(0)AT2 OS=Homo sapiens OX=9606 GN=SLC6A15 PE=1 SV=1	K	NA	NA	C#ITQNSETIMK	NA	NA	1	NA	NA	0.0190963	1
P30419	483	NMT1	NMT1_C483	NMT1_HUMAN Glycylpeptide N-tetradecanoyltransferase 1 OS=Homo sapiens OX=9606 GN=NMT1 PE=1 SV=2	K	NA	NA	C#PSMGAEK	NA	NA	2	NA	NA	0.118288	1
Q7L2E3	484	DHX30	DHX30_C484	DHX30_HUMAN ATP-dependent RNA helicase DHX30 OS=Homo sapiens OX=9606 GN=DHX30 PE=1 SV=1	R	NA	NA	C#NVIITQPR	NA	NA	1	NA	NA	0.0194637	1
Q96SW2	205	CRBN	CRBN_C205	CRBN_HUMAN Protein cereblon OS=Homo sapiens OX=9606 GN=CRBN PE=1 SV=1	K	NA	NA	C#QIFPSKPVSR	NA	NA	3	NA	NA	0.0375847	1
Q9UHG3	445	PCYOX1	PCYOX1_C445	PCYOX_HUMAN Prenylcysteine oxidase 1 OS=Homo sapiens OX=9606 GN=PCYOX1 PE=1 SV=3	K	NA	NA	C#PSIILHDR	NA	NA	1	NA	NA	0.0198417	1
Q10567	129	AP1B1	AP1B1_C129	AP1B1_HUMAN AP-1 complex subunit beta-1 OS=Homo sapiens OX=9606 GN=AP1B1 PE=1 SV=2	K	NA	NA	C#LKDEDPYVR	NA	NA	1	NA	NA	0.0210368	1
P35520	109	CBS	CBS_C109	CBS_HUMAN Cystathionine beta-synthase OS=Homo sapiens OX=9606 GN=CBS PE=1 SV=2	K	NA	NA	C#EFFNAGGSVK	NA	NA	1	NA	NA	0.0235976	1
P13861	359	PRKAR2A	PRKAR2A_C359	KAP2_HUMAN cAMP-dependent protein kinase type II-alpha regulatory subunit OS=Homo sapiens OX=9606 GN=PRKAR2A PE=1 SV=2	K	NA	NA	C#LVMDVQAFER	NA	NA	2	NA	NA	0.116402	1
Q99707	467	MTR	MTR_C467	METH_HUMAN Methionine synthase OS=Homo sapiens OX=9606 GN=MTR PE=1 SV=2	K	NA	NA	C#IVNSISLK	NA	NA	1	NA	NA	0.0280728	1
Q8N5C6	120	SRBD1	SRBD1_C120	SRBD1_HUMAN S1 RNA-binding domain-containing protein 1 OS=Homo sapiens OX=9606 GN=SRBD1 PE=1 SV=2	K	NA	NA	C#AAQPHTVR	NA	NA	1	NA	NA	0.0281578	1
Q9UG01	647	IFT172	IFT172_C647	IF172_HUMAN Intraflagellar transport protein 172 homolog OS=Homo sapiens OX=9606 GN=IFT172 PE=1 SV=2	R	NA	NA	C#FSALGQVAK	NA	NA	1	NA	NA	0.0292625	1
P36551	239	CPOX	CPOX_C239	HEM6_HUMAN Oxygen-dependent coproporphyrinogen-III oxidase, mitochondrial OS=Homo sapiens OX=9606 GN=CPOX PE=1 SV=3	F	NA	NA	C#AMGVSSVIHPK	NA	NA	2	NA	NA	0.0608945	1
P23921	662	RRM1	RRM1_C662	RIR1_HUMAN Ribonucleoside-diphosphate reductase large subunit OS=Homo sapiens OX=9606 GN=RRM1 PE=1 SV=1	A	NA	NA	C#NGSIQSIPEIPDDLK	NA	NA	1	NA	NA	0.0309945	1
Q14008	343	CKAP5	CKAP5_C343	CKAP5_HUMAN Cytoskeleton-associated protein 5 OS=Homo sapiens OX=9606 GN=CKAP5 PE=1 SV=3	K	NA	NA	C#LTGLAVGLR	NA	NA	1	NA	NA	0.0310504	1
Q8N0U8	58	VKORC1L1	VKORC1L1_C58	VKORL_HUMAN Vitamin K epoxide reductase complex subunit 1-like protein 1 OS=Homo sapiens OX=9606 GN=VKORC1L1 PE=1 SV=2	K	NA	NA	C#SAALASR	NA	NA	1	NA	NA	0.0315309	1
P28370	906	SMARCA1	SMARCA1_C906	SMCA1_HUMAN Probable global transcription activator SNF2L1 OS=Homo sapiens OX=9606 GN=SMARCA1 PE=1 SV=2	R	NA	NA	C#NELQDIEK	NA	NA	1	NA	NA	0.0345759	1
P63244	249	RACK1	RACK1_C249	RACK1_HUMAN Receptor of activated protein C kinase 1 OS=Homo sapiens OX=9606 GN=RACK1 PE=1 SV=3	L	NA	NA	C#AATGPSIK	NA	NA	1	NA	NA	0.0349403	1
Q15274	111	QPRT	QPRT_C111	NADC_HUMAN Nicotinate-nucleotide pyrophosphorylase [carboxylating] OS=Homo sapiens OX=9606 GN=QPRT PE=1 SV=3	R	NA	NA	C#SGIASAAAAAVEAAR	NA	NA	1	NA	NA	0.0364859	1
Q8N1G2	593	CMTR1	CMTR1_C593	CMTR1_HUMAN Cap-specific mRNA (nucleoside-2'-O-)-methyltransferase 1 OS=Homo sapiens OX=9606 GN=CMTR1 PE=1 SV=1	R	NA	NA	C#MVSGSEQK	NA	NA	2	NA	NA	0.102291	1
O15344	580	MID1	MID1_C580	TRI18_HUMAN E3 ubiquitin-protein ligase Midline-1 OS=Homo sapiens OX=9606 GN=MID1 PE=1 SV=1	R	NA	NA	C#NNNWVVR	NA	NA	1	NA	NA	0.0372612	1
P35520	165	CBS	CBS_C165	CBS_HUMAN Cystathionine beta-synthase OS=Homo sapiens OX=9606 GN=CBS PE=1 SV=2	R	NA	NA	C#IIVMPEK	NA	NA	1	NA	NA	0.0390474	1
P11387	300	TOP1	TOP1_C300	TOP1_HUMAN DNA topoisomerase 1 OS=Homo sapiens OX=9606 GN=TOP1 PE=1 SV=2	K	NA	NA	C#DFTQMSQYFK	NA	NA	3	NA	NA	0.0981714	1
P53396	20	ACLY	ACLY_C20	ACLY_HUMAN ATP-citrate synthase OS=Homo sapiens OX=9606 GN=ACLY PE=1 SV=3	I	NA	NA	C#TTSAIQNR	NA	NA	1	NA	NA	0.0417048	1
Q96B54	115	ZNF428	ZNF428_C115	ZN428_HUMAN Zinc finger protein 428 OS=Homo sapiens OX=9606 GN=ZNF428 PE=1 SV=2	C	NA	NA	C#PATAPQEAPAPEGR	NA	NA	1	NA	NA	0.0425852	1
A5YKK6	219	CNOT1	CNOT1_C219	CNOT1_HUMAN CCR4-NOT transcription complex subunit 1 OS=Homo sapiens OX=9606 GN=CNOT1 PE=1 SV=2	R	NA	NA	C#PVVLAPLLYPEK	NA	NA	1	NA	NA	0.0437319	1
Q9H6R3	498	ACSS3	ACSS3_C498	ACSS3_HUMAN Acyl-CoA synthetase short-chain family member 3, mitochondrial OS=Homo sapiens OX=9606 GN=ACSS3 PE=1 SV=1	R	NA	NA	C#LGNIVVK	NA	NA	1	NA	NA	0.0471035	1
Q8NFC6	2164	BOD1L1	BOD1L1_C2164	BD1L1_HUMAN Biorientation of chromosomes in cell division protein 1-like 1 OS=Homo sapiens OX=9606 GN=BOD1L1 PE=1 SV=2	K	NA	NA	C#AESLQPVAAAVEER	NA	NA	1	NA	NA	0.0475534	1
Q9Y5X1	427	SNX9	SNX9_C427	SNX9_HUMAN Sorting nexin-9 OS=Homo sapiens OX=9606 GN=SNX9 PE=1 SV=1	R	NA	NA	C#TGPLPK	NA	NA	1	NA	NA	0.0483045	1
O43913	409	ORC5	ORC5_C409	ORC5_HUMAN Origin recognition complex subunit 5 OS=Homo sapiens OX=9606 GN=ORC5 PE=1 SV=1	K	NA	NA	C#TVSLDFIR	NA	NA	1	NA	NA	0.050312	1
P49756	110	RBM25	RBM25_C110	RBM25_HUMAN RNA-binding protein 25 OS=Homo sapiens OX=9606 GN=RBM25 PE=1 SV=3	K	NA	NA	C#GLVLSWK	NA	NA	1	NA	NA	0.0507539	1
Q96SB3	272	PPP1R9B	PPP1R9B_C272	NEB2_HUMAN Neurabin-2 OS=Homo sapiens OX=9606 GN=PPP1R9B PE=1 SV=3	R	NA	NA	C#PAGQQPPQHR	NA	NA	1	NA	NA	0.0538978	1
O15228	73	GNPAT	GNPAT_C73	GNPAT_HUMAN Dihydroxyacetone phosphate acyltransferase OS=Homo sapiens OX=9606 GN=GNPAT PE=1 SV=1	K	NA	NA	C#SVLNSEEIHYVIK	NA	NA	1	NA	NA	0.0554069	1
P13010	339	XRCC5	XRCC5_C339	XRCC5_HUMAN X-ray repair cross-complementing protein 5 OS=Homo sapiens OX=9606 GN=XRCC5 PE=1 SV=3	K	NA	NA	C#FSVLGFCK	NA	NA	1	NA	NA	0.0554519	1
Q05655	344	PRKCD	PRKCD_C344	KPCD_HUMAN Protein kinase C delta type OS=Homo sapiens OX=9606 GN=PRKCD PE=1 SV=2	K	NA	NA	C#NINNFIFHK	NA	NA	2	NA	NA	0.0813303	1
P29558	194	RBMS1	RBMS1_C194	RBMS1_HUMAN RNA-binding motif, single-stranded-interacting protein 1 OS=Homo sapiens OX=9606 GN=RBMS1 PE=1 SV=3	K	NA	NA	C#EAVIGHFNGK	NA	NA	1	NA	NA	0.0565926	1
Q15345	297	LRRC41	LRRC41_C297	LRC41_HUMAN Leucine-rich repeat-containing protein 41 OS=Homo sapiens OX=9606 GN=LRRC41 PE=1 SV=3	R	NA	NA	C#AAALMASR	NA	NA	1	NA	NA	0.0615558	1
Q9UID3	190	VPS51	VPS51_C190	VPS51_HUMAN Vacuolar protein sorting-associated protein 51 homolog OS=Homo sapiens OX=9606 GN=VPS51 PE=1 SV=2	K	NA	NA	C#VELGAYGQAVR	NA	NA	1	NA	NA	0.0621546	1
P46937	343	YAP1	YAP1_C343	YAP1_HUMAN Transcriptional coactivator YAP1 OS=Homo sapiens OX=9606 GN=YAP1 PE=1 SV=2	K	NA	NA	C#QELALR	NA	NA	1	NA	NA	0.0623151	1
Q9UJX4	670	ANAPC5	ANAPC5_C670	APC5_HUMAN Anaphase-promoting complex subunit 5 OS=Homo sapiens OX=9606 GN=ANAPC5 PE=1 SV=2	K	NA	NA	C#QVASAASYDQPK	NA	NA	1	NA	NA	0.0633497	1
Q9NV70	566	EXOC1	EXOC1_C566	EXOC1_HUMAN Exocyst complex component 1 OS=Homo sapiens OX=9606 GN=EXOC1 PE=1 SV=4	N	NA	NA	C#GTPLPVSSEK	NA	NA	1	NA	NA	0.0636518	1
Q9UHB9	562	SRP68	SRP68_C562	SRP68_HUMAN Signal recognition particle subunit SRP68 OS=Homo sapiens OX=9606 GN=SRP68 PE=1 SV=2	F	NA	NA	C#LDPSLVTK	NA	NA	1	NA	NA	0.0637377	1
Q9UBF8	89	PI4KB	PI4KB_C89	PI4KB_HUMAN Phosphatidylinositol 4-kinase beta OS=Homo sapiens OX=9606 GN=PI4KB PE=1 SV=1	R	NA	NA	C#LDDPPAQIR	NA	NA	1	NA	NA	0.0665291	1
P49321	708	NASP	NASP_C708	NASP_HUMAN Nuclear autoantigenic sperm protein OS=Homo sapiens OX=9606 GN=NASP PE=1 SV=2	N	NA	NA	C#VTDISHLVR	NA	NA	1	NA	NA	0.0688365	1
Q53GG5	297	PDLIM3	PDLIM3_C297	PDLI3_HUMAN PDZ and LIM domain protein 3 OS=Homo sapiens OX=9606 GN=PDLIM3 PE=1 SV=1	K	NA	NA	C#GSGIVGAVVK	NA	NA	1	NA	NA	0.0734257	1
P62316	63	SNRPD2	SNRPD2_C63	SMD2_HUMAN Small nuclear ribonucleoprotein Sm D2 OS=Homo sapiens OX=9606 GN=SNRPD2 PE=1 SV=1	H	NA	NA	C#NMVLENVK	NA	NA	1	NA	NA	0.0735905	1
Q86Y56	173	DNAAF5	DNAAF5_C173	DAAF5_HUMAN Dynein assembly factor 5, axonemal OS=Homo sapiens OX=9606 GN=DNAAF5 PE=1 SV=4	R	NA	NA	C#SLLDPFAAVR	NA	NA	1	NA	NA	0.0748666	1
P48059	222	LIMS1	LIMS1_C222	LIMS1_HUMAN LIM and senescent cell antigen-like-containing domain protein 1 OS=Homo sapiens OX=9606 GN=LIMS1 PE=1 SV=4	K	NA	NA	C#EKPFLGHR	NA	NA	1	NA	NA	0.0774214	1
P13798	292	APEH	APEH_C292	ACPH_HUMAN Acylamino-acid-releasing enzyme OS=Homo sapiens OX=9606 GN=APEH PE=1 SV=4	K	NA	NA	C#ELLSDDSLAVSSPR	NA	NA	1	NA	NA	0.0788649	1
A1L0T0	276	ILVBL	ILVBL_C276	ILVBL_HUMAN Acetolactate synthase-like protein OS=Homo sapiens OX=9606 GN=ILVBL PE=1 SV=2	R	NA	NA	C#VEILSR	NA	NA	1	NA	NA	0.0789187	1
P11279	338	LAMP1	LAMP1_C338	LAMP1_HUMAN Lysosome-associated membrane glycoprotein 1 OS=Homo sapiens OX=9606 GN=LAMP1 PE=1 SV=3	K	NA	NA	C#NAEEHVR	NA	NA	1	NA	NA	0.0824595	1
Q96SI9	195	STRBP	STRBP_C195	STRBP_HUMAN Spermatid perinuclear RNA-binding protein OS=Homo sapiens OX=9606 GN=STRBP PE=1 SV=1	K	NA	NA	C#LNALASLR	NA	NA	1	NA	NA	0.0828332	1
Q13426	130	XRCC4	XRCC4_C130	XRCC4_HUMAN DNA repair protein XRCC4 OS=Homo sapiens OX=9606 GN=XRCC4 PE=1 SV=2	Y	NA	NA	C#LDTIAENQAK	NA	NA	1	NA	NA	0.0831773	1
Q15637	282	SF1	SF1_C282	SF01_HUMAN Splicing factor 1 OS=Homo sapiens OX=9606 GN=SF1 PE=1 SV=4	K	NA	NA	C#GGAGHIASDCK	NA	NA	1	NA	NA	0.0854243	1
A5YKK6	1932	CNOT1	CNOT1_C1932	CNOT1_HUMAN CCR4-NOT transcription complex subunit 1 OS=Homo sapiens OX=9606 GN=CNOT1 PE=1 SV=2	K	NA	NA	C#YHNLDAFVR	NA	NA	1	NA	NA	0.0892912	1
Q14789	1055	GOLGB1	GOLGB1_C1055	GOGB1_HUMAN Golgin subfamily B member 1 OS=Homo sapiens OX=9606 GN=GOLGB1 PE=1 SV=2	K	NA	NA	C#QEIEIYLK	NA	NA	1	NA	NA	0.0896774	1
Q7L1Q6	35	BZW1	BZW1_C35	BZW1_HUMAN Basic leucine zipper and W2 domain-containing protein 1 OS=Homo sapiens OX=9606 GN=BZW1 PE=1 SV=1	D	NA	NA	C#IIQGLTETGTDLEAVAK	NA	NA	1	NA	NA	0.0897493	1
Q96CX2	50	KCTD12	KCTD12_C50	KCD12_HUMAN BTB/POZ domain-containing protein KCTD12 OS=Homo sapiens OX=9606 GN=KCTD12 PE=1 SV=1	R	NA	NA	C#TVVSVPDSLLWR	NA	NA	1	NA	NA	0.0901652	1
Q5JTZ9	555	AARS2	AARS2_C555	SYAM_HUMAN Alanine--tRNA ligase, mitochondrial OS=Homo sapiens OX=9606 GN=AARS2 PE=1 SV=1	R	NA	NA	C#GLLLDR	NA	NA	2	NA	NA	0.228211	1
Q15738	104	NSDHL	NSDHL_C104	NSDHL_HUMAN Sterol-4-alpha-carboxylate 3-dehydrogenase, decarboxylating OS=Homo sapiens OX=9606 GN=NSDHL PE=1 SV=2	H	NA	NA	C#ASPPPSSNNK	NA	NA	1	NA	NA	0.0962442	1
P22087	268	FBL	FBL_C268	FBRL_HUMAN rRNA 2'-O-methyltransferase fibrillarin OS=Homo sapiens OX=9606 GN=FBL PE=1 SV=2	N	NA	NA	C#IDSTASAEAVFASEVK	NA	NA	1	NA	NA	0.096687	1
Q8NF37	514	LPCAT1	LPCAT1_C514	PCAT1_HUMAN Lysophosphatidylcholine acyltransferase 1 OS=Homo sapiens OX=9606 GN=LPCAT1 PE=1 SV=2	F	NA	NA	C#ADFSPENSDAGR	NA	NA	1	NA	NA	0.100184	1
Q9BW85	83	YJU2	YJU2_C83	YJU2_HUMAN Splicing factor YJU2 OS=Homo sapiens OX=9606 GN=YJU2 PE=1 SV=1	R	NA	NA	C#LAEITFK	NA	NA	1	NA	NA	0.101475	1
Q5VTR2	905	RNF20	RNF20_C905	BRE1A_HUMAN E3 ubiquitin-protein ligase BRE1A OS=Homo sapiens OX=9606 GN=RNF20 PE=1 SV=2	K	NA	NA	C#DEILMEEIK	NA	NA	1	NA	NA	0.102131	1
Q16851	276	UGP2	UGP2_C276	UGPA_HUMAN UTP--glucose-1-phosphate uridylyltransferase OS=Homo sapiens OX=9606 GN=UGP2 PE=1 SV=5	R	NA	NA	C#EFVMEVTNK	NA	NA	1	NA	NA	0.102727	1
Q92621	141	NUP205	NUP205_C141	NU205_HUMAN Nuclear pore complex protein Nup205 OS=Homo sapiens OX=9606 GN=NUP205 PE=1 SV=3	R	NA	NA	C#IANSLK	NA	NA	1	NA	NA	0.105231	1
P46782	172	RPS5	RPS5_C172	RS5_HUMAN 40S ribosomal protein S5 OS=Homo sapiens OX=9606 GN=RPS5 PE=1 SV=4	E	NA	NA	C#LADELINAAK	NA	NA	1	NA	NA	0.106156	1
Q15527	93	SURF2	SURF2_C93	SURF2_HUMAN Surfeit locus protein 2 OS=Homo sapiens OX=9606 GN=SURF2 PE=1 SV=3	K	NA	NA	C#PEHVLR	NA	NA	1	NA	NA	0.106839	1
Q9UIG0	1348	BAZ1B	BAZ1B_C1348	BAZ1B_HUMAN Tyrosine-protein kinase BAZ1B OS=Homo sapiens OX=9606 GN=BAZ1B PE=1 SV=2	K	NA	NA	C#EEILHK	NA	NA	1	NA	NA	0.108706	1
O14744	449	PRMT5	PRMT5_C449	ANM5_HUMAN Protein arginine N-methyltransferase 5 OS=Homo sapiens OX=9606 GN=PRMT5 PE=1 SV=4	E	NA	NA	C#LDGAQHFLK	NA	NA	1	NA	NA	0.110182	1
P40939	550	HADHA	HADHA_C550	ECHA_HUMAN Trifunctional enzyme subunit alpha, mitochondrial OS=Homo sapiens OX=9606 GN=HADHA PE=1 SV=2	R	NA	NA	C#LAPMMSEVIR	NA	NA	2	NA	NA	0.169423	1
Q14789	1964	GOLGB1	GOLGB1_C1964	GOGB1_HUMAN Golgin subfamily B member 1 OS=Homo sapiens OX=9606 GN=GOLGB1 PE=1 SV=2	K	NA	NA	C#VSELEEEKQQLVK	NA	NA	1	NA	NA	0.111541	1
P49756	83	RBM25	RBM25_C83	RBM25_HUMAN RNA-binding protein 25 OS=Homo sapiens OX=9606 GN=RBM25 PE=1 SV=3	N	NA	NA	C#GPTTTVFVGNISEK	NA	NA	1	NA	NA	0.112379	1
Q04446	473	GBE1	GBE1_C473	GLGB_HUMAN 1,4-alpha-glucan-branching enzyme OS=Homo sapiens OX=9606 GN=GBE1 PE=1 SV=3	K	NA	NA	C#IAYAESHDQALVGDK	NA	NA	1	NA	NA	0.11322	1
P49023	546	PXN	PXN_C546	PAXI_HUMAN Paxillin OS=Homo sapiens OX=9606 GN=PXN PE=1 SV=3	R	NA	NA	C#ITAMAK	NA	NA	1	NA	NA	0.115987	1
Q6ZW49	900	PAXIP1	PAXIP1_C900	PAXI1_HUMAN PAX-interacting protein 1 OS=Homo sapiens OX=9606 GN=PAXIP1 PE=1 SV=2	K	NA	NA	C#THLIASK	NA	NA	1	NA	NA	0.120925	1
Q5VWN6	847	TASOR2	TASOR2_C847	TASO2_HUMAN Protein TASOR 2 OS=Homo sapiens OX=9606 GN=TASOR2 PE=1 SV=1	K	NA	NA	C#SADSLLETNEISR	NA	NA	1	NA	NA	0.121548	1
Q13136	189	PPFIA1	PPFIA1_C189	LIPA1_HUMAN Liprin-alpha-1 OS=Homo sapiens OX=9606 GN=PPFIA1 PE=1 SV=1	R	NA	NA	C#SLLEEELGATHK	NA	NA	1	NA	NA	0.123128	1
P29372	61	MPG	MPG_C61	3MG_HUMAN DNA-3-methyladenine glycosylase OS=Homo sapiens OX=9606 GN=MPG PE=1 SV=3	R	NA	NA	C#LGPPTTPGPYR	NA	NA	2	NA	NA	0.232896	1
Q69YN2	176	CWF19L1	CWF19L1_C176	C19L1_HUMAN CWF19-like protein 1 OS=Homo sapiens OX=9606 GN=CWF19L1 PE=1 SV=2	K	NA	NA	C#GSALVSSLATGLKPR	NA	NA	1	NA	NA	0.128458	1
Q6PL18	387	ATAD2	ATAD2_C387	ATAD2_HUMAN ATPase family AAA domain-containing protein 2 OS=Homo sapiens OX=9606 GN=ATAD2 PE=1 SV=1	R	NA	NA	C#LPLNFR	NA	NA	1	NA	NA	0.128951	1
Q8WYP5	1261	AHCTF1	AHCTF1_C1261	ELYS_HUMAN Protein ELYS OS=Homo sapiens OX=9606 GN=AHCTF1 PE=1 SV=3	K	NA	NA	C#AVPVETEWLK	NA	NA	1	NA	NA	0.13328	1
Q5HYJ3	60	FAM76B	FAM76B_C60	FA76B_HUMAN Protein FAM76B OS=Homo sapiens OX=9606 GN=FAM76B PE=1 SV=3	K	NA	NA	C#AQNVK	NA	NA	1	NA	NA	0.137132	1
P98175	222	RBM10	RBM10_C222	RBM10_HUMAN RNA-binding protein 10 OS=Homo sapiens OX=9606 GN=RBM10 PE=1 SV=3	K	NA	NA	C#GVQNFK	NA	NA	1	NA	NA	0.137843	1
O00567	112	NOP56	NOP56_C112	NOP56_HUMAN Nucleolar protein 56 OS=Homo sapiens OX=9606 GN=NOP56 PE=1 SV=4	N	NA	NA	C#QTGGVIAEILR	NA	NA	1	NA	NA	0.139232	1
Q9H582	370	ZNF644	ZNF644_C370	ZN644_HUMAN Zinc finger protein 644 OS=Homo sapiens OX=9606 GN=ZNF644 PE=1 SV=2	K	NA	NA	C#GEESSPVHTSTFLSNTLK	NA	NA	1	NA	NA	0.139562	1
Q13643	10	FHL3	FHL3_C10	FHL3_HUMAN Four and a half LIM domains protein 3 OS=Homo sapiens OX=9606 GN=FHL3 PE=1 SV=4	K	NA	NA	C#NESLYGR	NA	NA	1	NA	NA	0.13981	1
P43304	285	GPD2	GPD2_C285	GPDM_HUMAN Glycerol-3-phosphate dehydrogenase, mitochondrial OS=Homo sapiens OX=9606 GN=GPD2 PE=1 SV=3	K	NA	NA	C#VINATGPFTDSVR	NA	NA	1	NA	NA	0.149528	1
Q9H0Q3	63	FXYD6	FXYD6_C63	FXYD6_HUMAN FXYD domain-containing ion transport regulator 6 OS=Homo sapiens OX=9606 GN=FXYD6 PE=1 SV=1	K	NA	NA	C#SFNQKPR	NA	NA	2	NA	NA	0.164411	1
Q9BUB4	349	ADAT1	ADAT1_C349	ADAT1_HUMAN tRNA-specific adenosine deaminase 1 OS=Homo sapiens OX=9606 GN=ADAT1 PE=1 SV=1	R	NA	NA	C#QNVSALPK	NA	NA	1	NA	NA	0.15255	1
P19623	89	SRM	SRM_C89	SPEE_HUMAN Spermidine synthase OS=Homo sapiens OX=9606 GN=SRM PE=1 SV=1	L	NA	NA	C#SHPNPR	NA	NA	2	NA	NA	0.222017	1
Q9NNW5	380	WDR6	WDR6_C380	WDR6_HUMAN WD repeat-containing protein 6 OS=Homo sapiens OX=9606 GN=WDR6 PE=1 SV=1	K	NA	NA	C#WEQLLEDK	NA	NA	1	NA	NA	0.157708	1
P78527	3293	PRKDC	PRKDC_C3293	PRKDC_HUMAN DNA-dependent protein kinase catalytic subunit OS=Homo sapiens OX=9606 GN=PRKDC PE=1 SV=3	G	NA	NA	C#SEQVLTVLK	NA	NA	1	NA	NA	0.162834	1
P57678	720	GEMIN4	GEMIN4_C720	GEMI4_HUMAN Gem-associated protein 4 OS=Homo sapiens OX=9606 GN=GEMIN4 PE=1 SV=2	R	NA	NA	C#ISIDR	NA	NA	1	NA	NA	0.163312	1
Q5UIP0	2274	RIF1	RIF1_C2274	RIF1_HUMAN Telomere-associated protein RIF1 OS=Homo sapiens OX=9606 GN=RIF1 PE=1 SV=2	K	NA	NA	C#LISEMAK	NA	NA	1	NA	NA	0.165239	1
P32969	134	RPL9	RPL9_C134	RL9_HUMAN 60S ribosomal protein L9 OS=Homo sapiens OX=9606 GN=RPL9 PE=1 SV=1	A	NA	NA	C#SVSQAQK	NA	NA	1	NA	NA	0.16617	1
Q70CQ2	2364	USP34	USP34_C2364	UBP34_HUMAN Ubiquitin carboxyl-terminal hydrolase 34 OS=Homo sapiens OX=9606 GN=USP34 PE=1 SV=2	K	NA	NA	C#PNQIVR	NA	NA	1	NA	NA	0.169229	1
Q9UMZ2	1134	SYNRG	SYNRG_C1134	SYNRG_HUMAN Synergin gamma OS=Homo sapiens OX=9606 GN=SYNRG PE=1 SV=2	R	NA	NA	C#LGSALNVIK	NA	NA	1	NA	NA	0.169426	1
P51610	149	HCFC1	HCFC1_C149	HCFC1_HUMAN Host cell factor 1 OS=Homo sapiens OX=9606 GN=HCFC1 PE=1 SV=2	K	NA	NA	C#YLFGGLANDSEDPK	NA	NA	1	NA	NA	0.176348	1
Q9H488	126	POFUT1	POFUT1_C126	OFUT1_HUMAN GDP-fucose protein O-fucosyltransferase 1 OS=Homo sapiens OX=9606 GN=POFUT1 PE=1 SV=1	Y	NA	NA	C#FEVAAQR	NA	NA	1	NA	NA	0.179653	1
Q92551	248	IP6K1	IP6K1_C248	IP6K1_HUMAN Inositol hexakisphosphate kinase 1 OS=Homo sapiens OX=9606 GN=IP6K1 PE=1 SV=3	K	NA	NA	C#EQSTSATLGVR	NA	NA	1	NA	NA	0.180165	1
P09960	26	LTA4H	LTA4H_C26	LKHA4_HUMAN Leukotriene A-4 hydrolase OS=Homo sapiens OX=9606 GN=LTA4H PE=1 SV=2	R	NA	NA	C#SVDFTR	NA	NA	2	NA	NA	0.200351	1
Q9Y3P9	346	RABGAP1	RABGAP1_C346	RBGP1_HUMAN Rab GTPase-activating protein 1 OS=Homo sapiens OX=9606 GN=RABGAP1 PE=1 SV=3	R	NA	NA	C#FGLLLSPGK	NA	NA	1	NA	NA	0.182102	1
O75369	416	FLNB	FLNB_C416	FLNB_HUMAN Filamin-B OS=Homo sapiens OX=9606 GN=FLNB PE=1 SV=2	R	NA	NA	C#VYKPMQPGPHVVK	NA	NA	1	NA	NA	0.182588	1
P15735	201	PHKG2	PHKG2_C201	PHKG2_HUMAN Phosphorylase b kinase gamma catalytic chain, liver/testis isoform OS=Homo sapiens OX=9606 GN=PHKG2 PE=1 SV=1	K	NA	NA	C#SMDETHPGYGK	NA	NA	1	NA	NA	0.184311	1
Q9Y4X5	347	ARIH1	ARIH1_C347	ARI1_HUMAN E3 ubiquitin-protein ligase ARIH1 OS=Homo sapiens OX=9606 GN=ARIH1 PE=1 SV=2	K	NA	NA	C#HVTIEK	NA	NA	1	NA	NA	0.185583	1
Q12789	136	GTF3C1	GTF3C1_C136	TF3C1_HUMAN General transcription factor 3C polypeptide 1 OS=Homo sapiens OX=9606 GN=GTF3C1 PE=1 SV=4	R	NA	NA	C#TMVEAFDR	NA	NA	2	NA	NA	0.24183	1
P07686	360	HEXB	HEXB_C360	HEXB_HUMAN Beta-hexosaminidase subunit beta OS=Homo sapiens OX=9606 GN=HEXB PE=1 SV=3	K	NA	NA	C#WESNPK	NA	NA	1	NA	NA	0.187203	1
Q9H6D7	241	HAUS4	HAUS4_C241	HAUS4_HUMAN HAUS augmin-like complex subunit 4 OS=Homo sapiens OX=9606 GN=HAUS4 PE=1 SV=1	R	NA	NA	C#LTLLQR	NA	NA	1	NA	NA	0.190459	1
Q5T0N5	247	FNBP1L	FNBP1L_C247	FBP1L_HUMAN Formin-binding protein 1-like OS=Homo sapiens OX=9606 GN=FNBP1L PE=1 SV=3	K	NA	NA	C#LEGMILAAK	NA	NA	1	NA	NA	0.193237	1
Q7Z5K2	133	WAPL	WAPL_C133	WAPL_HUMAN Wings apart-like protein homolog OS=Homo sapiens OX=9606 GN=WAPL PE=1 SV=1	K	NA	NA	C#FPLEDTLLGK	NA	NA	1	NA	NA	0.193426	1
O60313	375	OPA1	OPA1_C375	OPA1_HUMAN Dynamin-like 120 kDa protein, mitochondrial OS=Homo sapiens OX=9606 GN=OPA1 PE=1 SV=3	G	NA	NA	C#TVSPETISLNVK	NA	NA	1	NA	NA	0.195227	1
Q92922	462	SMARCC1	SMARCC1_C462	SMRC1_HUMAN SWI/SNF complex subunit SMARCC1 OS=Homo sapiens OX=9606 GN=SMARCC1 PE=1 SV=3	N	NA	NA	C#IHVIER	NA	NA	1	NA	NA	0.195656	1
Q9H7D7	316	WDR26	WDR26_C316	WDR26_HUMAN WD repeat-containing protein 26 OS=Homo sapiens OX=9606 GN=WDR26 PE=1 SV=3	R	NA	NA	C#LYHNTK	NA	NA	1	NA	NA	0.199184	1
P46379	856	BAG6	BAG6_C856	BAG6_HUMAN Large proline-rich protein BAG6 OS=Homo sapiens OX=9606 GN=BAG6 PE=1 SV=2	H	NA	NA	C#TDSGFGAR	NA	NA	1	NA	NA	0.199638	1
Q9BS26	241	ERP44	ERP44_C241	ERP44_HUMAN Endoplasmic reticulum resident protein 44 OS=Homo sapiens OX=9606 GN=ERP44 PE=1 SV=1	K	NA	NA	C#VPLVR	NA	NA	1	NA	NA	0.202705	1
Q9BUT1	145	BDH2	BDH2_C145	BDH2_HUMAN 3-hydroxybutyrate dehydrogenase type 2 OS=Homo sapiens OX=9606 GN=BDH2 PE=1 SV=2	R	NA	NA	C#VYSTTK	NA	NA	1	NA	NA	0.204973	1
Q9NZ32	37	ACTR10	ACTR10_C37	ARP10_HUMAN Actin-related protein 10 OS=Homo sapiens OX=9606 GN=ACTR10 PE=1 SV=1	R	NA	NA	C#IIPSVIK	NA	NA	1	NA	NA	0.209474	1
Q86VP6	802	CAND1	CAND1_C802	CAND1_HUMAN Cullin-associated NEDD8-dissociated protein 1 OS=Homo sapiens OX=9606 GN=CAND1 PE=1 SV=2	K	NA	NA	C#VAALTR	NA	NA	1	NA	NA	0.209742	1
Q7Z7A3	210	CTU1	CTU1_C210	CTU1_HUMAN Cytoplasmic tRNA 2-thiolation protein 1 OS=Homo sapiens OX=9606 GN=CTU1 PE=1 SV=1	R	NA	NA	C#RPLQFASQK	NA	NA	1	NA	NA	0.212321	1
Q9HCN8	100	SDF2L1	SDF2L1_C100	SDF2L_HUMAN Stromal cell-derived factor 2-like protein 1 OS=Homo sapiens OX=9606 GN=SDF2L1 PE=1 SV=2	R	NA	NA	C#GQAVR	NA	NA	1	NA	NA	0.212885	1
P53794	575	SLC5A3	SLC5A3_C575	SC5A3_HUMAN Sodium/myo-inositol cotransporter OS=Homo sapiens OX=9606 GN=SLC5A3 PE=1 SV=2	R	NA	NA	C#SENNETINHIIPNGK	NA	NA	1	NA	NA	0.218118	1
Q9C0J8	120	WDR33	WDR33_C120	WDR33_HUMAN pre-mRNA 3' end processing protein WDR33 OS=Homo sapiens OX=9606 GN=WDR33 PE=1 SV=2	K	NA	NA	C#PVFVVR	NA	NA	1	NA	NA	0.220211	1
Q8WUY1	85	THEM6	THEM6_C85	THEM6_HUMAN Protein THEM6 OS=Homo sapiens OX=9606 GN=THEM6 PE=1 SV=2	R	NA	NA	C#GVLGALR	NA	NA	1	NA	NA	0.222174	1
Q8IX01	371	SUGP2	SUGP2_C371	SUGP2_HUMAN SURP and G-patch domain-containing protein 2 OS=Homo sapiens OX=9606 GN=SUGP2 PE=1 SV=2	K	NA	NA	C#SLKPEHR	NA	NA	1	NA	NA	0.229107	1
Q7Z6B0	247	CCDC91	CCDC91_C247	CCD91_HUMAN Coiled-coil domain-containing protein 91 OS=Homo sapiens OX=9606 GN=CCDC91 PE=1 SV=2	K	NA	NA	C#EELLNAQHQR	NA	NA	1	NA	NA	0.229263	1
Q9BRX2	204	PELO	PELO_C204	PELO_HUMAN Protein pelota homolog OS=Homo sapiens OX=9606 GN=PELO PE=1 SV=2	K	NA	NA	C#ILVASPGFVR	NA	NA	1	NA	NA	0.231658	1
O15226	424	NKRF	NKRF_C424	NKRF_HUMAN NF-kappa-B-repressing factor OS=Homo sapiens OX=9606 GN=NKRF PE=1 SV=2	Q	NA	NA	C#HTGSSPR	NA	NA	1	NA	NA	0.234251	1
Q8TAQ2	80	SMARCC2	SMARCC2_C80	SMRC2_HUMAN SWI/SNF complex subunit SMARCC2 OS=Homo sapiens OX=9606 GN=SMARCC2 PE=1 SV=1	K	NA	NA	C#FLDFK	NA	NA	1	NA	NA	0.236882	1
O43156	940	TTI1	TTI1_C940	TTI1_HUMAN TELO2-interacting protein 1 homolog OS=Homo sapiens OX=9606 GN=TTI1 PE=1 SV=3	K	NA	NA	C#GDFLR	NA	NA	1	NA	NA	0.238993	1
Q9NV35	28	NUDT15	NUDT15_C28	NUD15_HUMAN Nucleotide triphosphate diphosphatase NUDT15 OS=Homo sapiens OX=9606 GN=NUDT15 PE=1 SV=1	R	NA	NA	C#VLLGK	NA	NA	1	NA	NA	0.24017	1
Q14571	1397	ITPR2	ITPR2_C1397	ITPR2_HUMAN Inositol 1,4,5-trisphosphate receptor type 2 OS=Homo sapiens OX=9606 GN=ITPR2 PE=1 SV=2	K	NA	NA	C#NSLLPLDDIVR	NA	NA	1	NA	NA	0.242269	1
Q9P2J5	1053	LARS	LARS_C1053	SYLC_HUMAN Leucine--tRNA ligase, cytoplasmic OS=Homo sapiens OX=9606 GN=LARS PE=1 SV=2	C	NA	NA	C#PGKPLNVFR	NA	NA	1	NA	NA	0.248	1
O75152	588	ZC3H11A	ZC3H11A_C588	ZC11A_HUMAN Zinc finger CCCH domain-containing protein 11A OS=Homo sapiens OX=9606 GN=ZC3H11A PE=1 SV=3	S	NA	NA	C#NTQVAEKPVLTAVPGITR	NA	NA	1	NA	NA	0.256435	1
Q2M296	113	MTHFSD	MTHFSD_C113	MTHSD_HUMAN Methenyltetrahydrofolate synthase domain-containing protein OS=Homo sapiens OX=9606 GN=MTHFSD PE=1 SV=2	K	NA	NA	C#ATSQGVR	NA	NA	1	NA	NA	0.258791	1
P15924	1100	DSP	DSP_C1100	DESP_HUMAN Desmoplakin OS=Homo sapiens OX=9606 GN=DSP PE=1 SV=3	K	NA	NA	C#YGQIK	NA	NA	1	NA	NA	0.258812	1
P49736	315	MCM2	MCM2_C315	MCM2_HUMAN DNA replication licensing factor MCM2 OS=Homo sapiens OX=9606 GN=MCM2 PE=1 SV=4	S	NA	NA	C#TGVLPQLSMVK	NA	NA	1	NA	NA	0.259886	1
Q69YU5	22	C12orf73	C12orf73_C22	CL073_HUMAN Uncharacterized protein C12orf73 OS=Homo sapiens OX=9606 GN=C12orf73 PE=3 SV=2	M	NA	NA	C#AGAEVVHR	NA	NA	1	NA	NA	0.260556	1
Q96PK6	90	RBM14	RBM14_C90	RBM14_HUMAN RNA-binding protein 14 OS=Homo sapiens OX=9606 GN=RBM14 PE=1 SV=2	A	NA	NA	C#TSQELR	NA	NA	1	NA	NA	0.263752	1
Q75N03	112	CBLL1	CBLL1_C112	HAKAI_HUMAN E3 ubiquitin-protein ligase Hakai OS=Homo sapiens OX=9606 GN=CBLL1 PE=1 SV=1	K	NA	NA	C#GLPIK	NA	NA	1	NA	NA	0.265491	1
Q9P287	141	BCCIP	BCCIP_C141	BCCIP_HUMAN BRCA2 and CDKN1A-interacting protein OS=Homo sapiens OX=9606 GN=BCCIP PE=1 SV=1	Q	NA	NA	C#VEQIQELVLR	NA	NA	1	NA	NA	0.266366	1
P15924	2259	DSP	DSP_C2259	DESP_HUMAN Desmoplakin OS=Homo sapiens OX=9606 GN=DSP PE=1 SV=3	S	NA	NA	C#IAGIYNETTK	NA	NA	1	NA	NA	0.266937	1
P25789	163	PSMA4	PSMA4_C163	PSA4_HUMAN Proteasome subunit alpha type-4 OS=Homo sapiens OX=9606 GN=PSMA4 PE=1 SV=1	T	NA	NA	C#IGNNSAAAVSMLK	NA	NA	1	NA	NA	0.26774	1
Q9NR30	418	DDX21	DDX21_C418	DDX21_HUMAN Nucleolar RNA helicase 2 OS=Homo sapiens OX=9606 GN=DDX21 PE=1 SV=5	K	NA	NA	C#HWTQR	NA	NA	2	NA	NA	0.29653	1
Q9Y4E5	741	ZNF451	ZNF451_C741	ZN451_HUMAN E3 SUMO-protein ligase ZNF451 OS=Homo sapiens OX=9606 GN=ZNF451 PE=1 SV=2	R	NA	NA	C#LQIMLDK	NA	NA	1	NA	NA	0.277133	1
Q8WYP5	521	AHCTF1	AHCTF1_C521	ELYS_HUMAN Protein ELYS OS=Homo sapiens OX=9606 GN=AHCTF1 PE=1 SV=3	R	NA	NA	C#LVAGLLSPR	NA	NA	1	NA	NA	0.277242	1
Q12965	790	MYO1E	MYO1E_C790	MYO1E_HUMAN Unconventional myosin-Ie OS=Homo sapiens OX=9606 GN=MYO1E PE=1 SV=2	K	NA	NA	C#LYLIGR	NA	NA	1	NA	NA	0.279969	1
O00213	511	APBB1	APBB1_C511	APBB1_HUMAN Amyloid-beta A4 precursor protein-binding family B member 1 OS=Homo sapiens OX=9606 GN=APBB1 PE=1 SV=2	R	NA	NA	C#LVNGLSLDHSK	NA	NA	1	NA	NA	0.284675	1
Q9UIA9	606	XPO7	XPO7_C606	XPO7_HUMAN Exportin-7 OS=Homo sapiens OX=9606 GN=XPO7 PE=1 SV=3	R	NA	NA	C#EPITSK	NA	NA	1	NA	NA	0.28921	1
O14593	205	RFXANK	RFXANK_C205	RFXK_HUMAN DNA-binding protein RFXANK OS=Homo sapiens OX=9606 GN=RFXANK PE=1 SV=2	K	NA	NA	C#VEALLAR	NA	NA	1	NA	NA	0.294456	1
Q9NYF8	242	BCLAF1	BCLAF1_C242	BCLF1_HUMAN Bcl-2-associated transcription factor 1 OS=Homo sapiens OX=9606 GN=BCLAF1 PE=1 SV=2	S	NA	NA	C#SDAPMLSTVHSAK	NA	NA	1	NA	NA	0.296546	1
Q9UKD2	33	MRTO4	MRTO4_C33	MRT4_HUMAN mRNA turnover protein 4 homolog OS=Homo sapiens OX=9606 GN=MRTO4 PE=1 SV=2	K	NA	NA	C#VDTYK	NA	NA	1	NA	NA	0.300463	1
Q6ZRQ5	1068	MMS22L	MMS22L_C1068	MMS22_HUMAN Protein MMS22-like OS=Homo sapiens OX=9606 GN=MMS22L PE=1 SV=3	K	NA	NA	C#IVQVIR	NA	NA	1	NA	NA	0.304913	1
Q9BTU6	124	PI4K2A	PI4K2A_C124	P4K2A_HUMAN Phosphatidylinositol 4-kinase type 2-alpha OS=Homo sapiens OX=9606 GN=PI4K2A PE=1 SV=1	R	NA	NA	C#IFPER	NA	NA	1	NA	NA	0.312706	1
P00558	108	PGK1	PGK1_C108	PGK1_HUMAN Phosphoglycerate kinase 1 OS=Homo sapiens OX=9606 GN=PGK1 PE=1 SV=3	A	NA	NA	C#ANPAAGSVILLENLR	NA	NA	1	NA	NA	0.314591	1
Q96GA7	38	SDSL	SDSL_C38	SDSL_HUMAN Serine dehydratase-like OS=Homo sapiens OX=9606 GN=SDSL PE=1 SV=1	K	NA	NA	C#ENVQPSGSFK	NA	NA	1	NA	NA	0.316352	1
Q9NVE7	537	PANK4	PANK4_C537	PANK4_HUMAN Pantothenate kinase 4 OS=Homo sapiens OX=9606 GN=PANK4 PE=1 SV=1	R	NA	NA	C#FPGVVR	NA	NA	1	NA	NA	0.324836	1
O95071	2267	UBR5	UBR5_C2267	UBR5_HUMAN E3 ubiquitin-protein ligase UBR5 OS=Homo sapiens OX=9606 GN=UBR5 PE=1 SV=2	R	NA	NA	C#ATTPMAVHR	NA	NA	1	NA	NA	0.328938	1
Q15172	359	PPP2R5A	PPP2R5A_C359	2A5A_HUMAN Serine/threonine-protein phosphatase 2A 56 kDa regulatory subunit alpha isoform OS=Homo sapiens OX=9606 GN=PPP2R5A PE=1 SV=1	K	NA	NA	C#VSSSHFQVAER	NA	NA	1	NA	NA	0.329005	1
Q69YN4	1008	VIRMA	VIRMA_C1008	VIR_HUMAN Protein virilizer homolog OS=Homo sapiens OX=9606 GN=VIRMA PE=1 SV=2	R	NA	NA	C#TLTLLK	NA	NA	1	NA	NA	0.329448	1
Q9UBF2	44	COPG2	COPG2_C44	COPG2_HUMAN Coatomer subunit gamma-2 OS=Homo sapiens OX=9606 GN=COPG2 PE=1 SV=1	R	NA	NA	C#LHILTK	NA	NA	1	NA	NA	0.339226	1
Q8NFC6	2599	BOD1L1	BOD1L1_C2599	BD1L1_HUMAN Biorientation of chromosomes in cell division protein 1-like 1 OS=Homo sapiens OX=9606 GN=BOD1L1 PE=1 SV=2	K	NA	NA	C#EQDLTIK	NA	NA	1	NA	NA	0.339804	1
P10606	116	COX5B	COX5B_C116	COX5B_HUMAN Cytochrome c oxidase subunit 5B, mitochondrial OS=Homo sapiens OX=9606 GN=COX5B PE=1 SV=2	R	NA	NA	C#GAHYK	NA	NA	1	NA	NA	0.341173	1
Q8IY67	297	RAVER1	RAVER1_C297	RAVR1_HUMAN Ribonucleoprotein PTB-binding 1 OS=Homo sapiens OX=9606 GN=RAVER1 PE=1 SV=1	F	NA	NA	C#APGPPGR	NA	NA	1	NA	NA	0.341705	1
O15228	54	GNPAT	GNPAT_C54	GNPAT_HUMAN Dihydroxyacetone phosphate acyltransferase OS=Homo sapiens OX=9606 GN=GNPAT PE=1 SV=1	K	NA	NA	C#YTPLVYK	NA	NA	1	NA	NA	0.34663	1
Q9Y366	386	IFT52	IFT52_C386	IFT52_HUMAN Intraflagellar transport protein 52 homolog OS=Homo sapiens OX=9606 GN=IFT52 PE=1 SV=3	K	NA	NA	C#GDILGVTSK	NA	NA	1	NA	NA	0.349254	1
Q9BYT8	272	NLN	NLN_C272	NEUL_HUMAN Neurolysin, mitochondrial OS=Homo sapiens OX=9606 GN=NLN PE=1 SV=1	R	NA	NA	C#KEENTIILQQLLPLR	NA	NA	1	NA	NA	0.352047	1
Q96A33	215	CCDC47	CCDC47_C215	CCD47_HUMAN Coiled-coil domain-containing protein 47 OS=Homo sapiens OX=9606 GN=CCDC47 PE=1 SV=1	C	NA	NA	C#EGMLIQLR	NA	NA	1	NA	NA	0.354	1
P16615	498	ATP2A2	ATP2A2_C498	AT2A2_HUMAN Sarcoplasmic/endoplasmic reticulum calcium ATPase 2 OS=Homo sapiens OX=9606 GN=ATP2A2 PE=1 SV=1	Y	NA	NA	C#TPNKPSR	NA	NA	1	NA	NA	0.362705	1
P15735	294	PHKG2	PHKG2_C294	PHKG2_HUMAN Phosphorylase b kinase gamma catalytic chain, liver/testis isoform OS=Homo sapiens OX=9606 GN=PHKG2 PE=1 SV=1	R	NA	NA	C#EGSQPWNLTPR	NA	NA	1	NA	NA	0.363204	1
P53621	1185	COPA	COPA_C1185	COPA_HUMAN Coatomer subunit alpha OS=Homo sapiens OX=9606 GN=COPA PE=1 SV=2	K	NA	NA	C#PLSGACYSPEFK	NA	NA	1	NA	NA	0.365497	1
P42684	982	ABL2	ABL2_C982	ABL2_HUMAN Tyrosine-protein kinase ABL2 OS=Homo sapiens OX=9606 GN=ABL2 PE=1 SV=1	K	NA	NA	C#APPPPPVMR	NA	NA	1	NA	NA	0.368838	1
Q5VTE6	407	ANGEL2	ANGEL2_C407	ANGE2_HUMAN Protein angel homolog 2 OS=Homo sapiens OX=9606 GN=ANGEL2 PE=2 SV=1	N	NA	NA	C#VYEVQQVPK	NA	NA	1	NA	NA	0.369642	1
O15371	19	EIF3D	EIF3D_C19	EIF3D_HUMAN Eukaryotic translation initiation factor 3 subunit D OS=Homo sapiens OX=9606 GN=EIF3D PE=1 SV=1	P	NA	NA	C#AVPEQFR	NA	NA	1	NA	NA	0.372032	1
O43920	33	NDUFS5	NDUFS5_C33	NDUS5_HUMAN NADH dehydrogenase [ubiquinone] iron-sulfur protein 5 OS=Homo sapiens OX=9606 GN=NDUFS5 PE=1 SV=3	R	NA	NA	C#HAFEK	NA	NA	1	NA	NA	0.373702	1
O75074	227	LRP3	LRP3_C227	LRP3_HUMAN Low-density lipoprotein receptor-related protein 3 OS=Homo sapiens OX=9606 GN=LRP3 PE=2 SV=2	R	NA	NA	C#LPVER	NA	NA	1	NA	NA	0.379384	1
P49585	37	PCYT1A	PCYT1A_C37	PCY1A_HUMAN Choline-phosphate cytidylyltransferase A OS=Homo sapiens OX=9606 GN=PCYT1A PE=1 SV=2	R	NA	NA	C#AVGLR	NA	NA	1	NA	NA	0.379592	1
O76021	197	RSL1D1	RSL1D1_C197	RL1D1_HUMAN Ribosomal L1 domain-containing protein 1 OS=Homo sapiens OX=9606 GN=RSL1D1 PE=1 SV=3	D	NA	NA	C#IGGTVLNISK	NA	NA	1	NA	NA	0.382138	1
Q8TD55	388	PLEKHO2	PLEKHO2_C388	PKHO2_HUMAN Pleckstrin homology domain-containing family O member 2 OS=Homo sapiens OX=9606 GN=PLEKHO2 PE=1 SV=1	R	NA	NA	C#SSLGDLLGEGPR	NA	NA	1	NA	NA	0.38281	1
P35637	428	FUS	FUS_C428	FUS_HUMAN RNA-binding protein FUS OS=Homo sapiens OX=9606 GN=FUS PE=1 SV=1	K	NA	NA	C#PNPTCENMNFSWR	NA	NA	1	NA	NA	0.384083	1
Q9NVU0	553	POLR3E	POLR3E_C553	RPC5_HUMAN DNA-directed RNA polymerase III subunit RPC5 OS=Homo sapiens OX=9606 GN=POLR3E PE=1 SV=1	G	NA	NA	C#ASTPVAR	NA	NA	1	NA	NA	0.385657	1
P49757	37	NUMB	NUMB_C37	NUMB_HUMAN Protein numb homolog OS=Homo sapiens OX=9606 GN=NUMB PE=1 SV=2	K	NA	NA	C#SFPVK	NA	NA	1	NA	NA	0.38851	1
P25205	243	MCM3	MCM3_C243	MCM3_HUMAN DNA replication licensing factor MCM3 OS=Homo sapiens OX=9606 GN=MCM3 PE=1 SV=3	R	NA	NA	C#LPGKK	NA	NA	1	NA	NA	0.39009	1
P24390	29	KDELR1	KDELR1_C29	ERD21_HUMAN ER lumen protein-retaining receptor 1 OS=Homo sapiens OX=9606 GN=KDELR1 PE=1 SV=1	S	NA	NA	C#AGISGK	NA	NA	1	NA	NA	0.392727	1
P09874	311	PARP1	PARP1_C311	PARP1_HUMAN Poly [ADP-ribose] polymerase 1 OS=Homo sapiens OX=9606 GN=PARP1 PE=1 SV=4	Y	NA	NA	C#TGDVTAWTK	NA	NA	1	NA	NA	0.392928	1
Q9HAD4	138	WDR41	WDR41_C138	WDR41_HUMAN WD repeat-containing protein 41 OS=Homo sapiens OX=9606 GN=WDR41 PE=1 SV=3	K	NA	NA	C#LTVLQR	NA	NA	1	NA	NA	0.394865	1
P78345	176	RPP38	RPP38_C176	RPP38_HUMAN Ribonuclease P protein subunit p38 OS=Homo sapiens OX=9606 GN=RPP38 PE=1 SV=2	K	NA	NA	C#VLALAFK	NA	NA	1	NA	NA	0.397225	1
Q5THK1	428	PRR14L	PRR14L_C428	PR14L_HUMAN Protein PRR14L OS=Homo sapiens OX=9606 GN=PRR14L PE=1 SV=1	R	NA	NA	C#SGEKEPVVSPK	NA	NA	1	NA	NA	0.399181	1
Q14974	765	KPNB1	KPNB1_C765	IMB1_HUMAN Importin subunit beta-1 OS=Homo sapiens OX=9606 GN=KPNB1 PE=1 SV=2	S	NA	NA	C#LEAYTGIVQGLK	NA	NA	1	NA	NA	0.399839	1
